# Supplementary material for: Genome Sequence, Assembly and Characterization of Two Metschnikowia fructicola Strains Used as Biocontrol Agents of Postharvest Diseases
Source: Front Microbiol. 2018 Apr 3;9:593. doi: 10.3389/fmicb.2018.00593 (PMC5891927; doi:10.3389/fmicb.2018.00593)
Supplement: TABLE S1 — Annotation of Mf transcripts. [file Table_1.XLSX]

## Sheet: Supplementary_table_1_MF_blast2
Tags	Description	SeqName	Length	#Hits	e-Value	sim mean	#GO	GO IDs	GO Names	Enzyme Codes	Enzyme Names	InterPro IDs	InterPro GO IDs	InterPro GO Names
[INTERPRO, BLASTED, MAPPED, ANNOTATED]	gene_ID_unitig0_1	A0A1A0HIB0_9ASCOUrea transport OS=Metschnikowia bicuspidata bicuspidata NRRL YB-4993 GN=METBIDRAFT_30271 PE=3 SV=1	567	20	0	81.1	3	P:GO:0055085; C:GO:0016021; F:GO:0005215	P:transmembrane transport; C:integral component of membrane; F:transporter activity	PTHR11819 (PANTHER); PTHR11819:SF180 (PANTHER); IPR001734 (PROSITE_PROFILES); TMhelix (TMHMM); TMhelix (TMHMM); TMhelix (TMHMM); TMhelix (TMHMM); TMhelix (TMHMM); TMhelix (TMHMM); TMhelix (TMHMM); TMhelix (TMHMM); TMhelix (TMHMM); TMhelix (TMHMM); TMhelix (TMHMM); TMhelix (TMHMM); TMhelix (TMHMM)	P:GO:0055085; C:GO:0016020; P:GO:0006810; F:GO:0005215	P:transmembrane transport; C:membrane; P:transport; F:transporter activity
[INTERPRO, BLASTED, MAPPED, ANNOTATED]	gene_ID_unitig0_2	A0A1A0HJ87_9ASCOPurine nucleoside permease OS=Metschnikowia bicuspidata bicuspidata NRRL YB-4993 GN=METBIDRAFT_76825 PE=3 SV=1	397	20	0	77.9	5	P:GO:0055085; F:GO:0003824; P:GO:0009116; F:GO:0015506; P:GO:0015858	P:transmembrane transport; F:catalytic activity; P:nucleoside metabolic process; F:nucleoside:proton symporter activity; P:nucleoside transport	IPR009486 (PFAM); IPR009486 (PIRSF); G3DSA:3.40.50.1580 (GENE3D); PTHR38643 (PANTHER)	P:GO:0055085	P:transmembrane transport
[INTERPRO, BLASTED, MAPPED, ANNOTATED]	gene_ID_unitig0_3	A0A1L0BJC5_9ASCOCIC11C00000005907 OS=	1090	20	0	61.35	5	P:GO:0006281; F:GO:0097159; F:GO:1901363; P:GO:0006310; C:GO:0044427	P:DNA repair; F:organic cyclic compound binding; F:heterocyclic compound binding; P:DNA recombination; C:chromosomal part	Coil (COILS); Coil (COILS); Coil (COILS); Coil (COILS); Coil (COILS); Coil (COILS); Coil (COILS); PF13476 (PFAM); G3DSA:1.10.287.620 (GENE3D); G3DSA:3.40.50.300 (GENE3D); G3DSA:3.40.50.300 (GENE3D); G3DSA:1.20.5.340 (GENE3D); mobidb-lite (MOBIDB_LITE); IPR027132 (PTHR19306:PANTHER); PTHR19306 (PANTHER); cd03276 (CDD); IPR027417 (SUPERFAMILY); IPR027417 (SUPERFAMILY)	P:GO:0006281; C:GO:0030915; P:GO:0000724	P:DNA repair; C:Smc5-Smc6 complex; P:double-strand break repair via homologous recombination
[INTERPRO, BLASTED, MAPPED]	gene_ID_unitig0_4	A0A1L0G4U0_9ASCOCIC11C00000001544 OS=	447	20	1.5959e-179	51.85	3	P:GO:0008150; C:GO:0005575; F:GO:0003674	P:biological_process; C:cellular_component; F:molecular_function	IPR011990 (G3DSA:1.25.40.GENE3D)	F:GO:0005515	F:protein binding
[INTERPRO, BLASTED, MAPPED, ANNOTATED]	gene_ID_unitig0_5	A0A1L0BK88_9ASCOCIC11C00000004541 OS=	378	20	0	68.4	10	F:GO:0022892; P:GO:0055085; P:GO:1902580; F:GO:0043022; P:GO:0072655; C:GO:0044455; P:GO:0051649; C:GO:0005743; P:GO:0007006; P:GO:0051205	F:substrate-specific transporter activity; P:transmembrane transport; P:single-organism cellular localization; F:ribosome binding; P:establishment of protein localization to mitochondrion; C:mitochondrial membrane part; P:establishment of localization in cell; C:mitochondrial inner membrane; P:mitochondrial membrane organization; P:protein insertion into membrane	Coil (COILS); IPR001708 (PFAM); IPR028055 (TIGRFAM); IPR001708 (PANTHER); PTHR12428:SF25 (PANTHER); TMhelix (TMHMM); TMhelix (TMHMM)	C:GO:0016021; P:GO:0051205	C:integral component of membrane; P:protein insertion into membrane
[INTERPRO, BLASTED, MAPPED, ANNOTATED]	gene_ID_unitig0_6_partial	A0A1L0BJB6_9ASCOCIC11C00000000254 OS=	878	20	0	70.1	5	C:GO:0030427; F:GO:0098772; P:GO:0007165; C:GO:0044444; C:GO:0071944	C:site of polarized growth; F:molecular function regulator; P:signal transduction; C:cytoplasmic part; C:cell periphery	IPR000198 (SMART); G3DSA:1.20.870.10 (GENE3D); G3DSA:1.10.555.10 (GENE3D); IPR000651 (PFAM); IPR000198 (PFAM); PTHR23182:SF9 (PANTHER); PTHR23182 (PANTHER); IPR000198 (PROSITE_PROFILES); cd00159 (CDD); IPR023578 (SUPERFAMILY); IPR008936 (SUPERFAMILY); IPR023578 (SUPERFAMILY)	P:GO:0007165	P:signal transduction
[INTERPRO, BLASTED, MAPPED]	gene_ID_unitig4_1	A0A1L0GN46_9ASCOCIC11C00000002163 OS=	349	20	1.00814e-157	65.25	3	F:GO:0018064; C:GO:0005829; P:GO:0042038	F:protein-histidine N-methyltransferase activity; C:cytosol; P:peptidyl-histidine methylation, to form tele-methylhistidine	G3DSA:3.40.50.150 (GENE3D); PTHR14614 (PANTHER); PTHR14614:SF64 (PANTHER)	no GO terms	no GO terms
[INTERPRO, BLASTED, MAPPED, ANNOTATED]	gene_ID_unitig4_2	A0A1L0GL19_9ASCOCIC11C00000005812 OS=	1233	20	0	83.7	3	C:GO:0005635; C:GO:0005829; P:GO:0071528	C:nuclear envelope; C:cytosol; P:tRNA re-export from nucleus	IPR013598 (PFAM); IPR011989 (G3DSA:1.25.10.GENE3D); mobidb-lite (MOBIDB_LITE); PTHR11223:SF7 (PANTHER); PTHR11223 (PANTHER); IPR016024 (SUPERFAMILY)	F:GO:0005488	F:binding
[INTERPRO, BLASTED, MAPPED, ANNOTATED]	gene_ID_unitig4_3	A0A1A0HK13_9ASCOBSD-domain-containing OS=Metschnikowia bicuspidata bicuspidata NRRL YB-4993 GN=METBIDRAFT_134619 PE=4 SV=1	947	20	0	75.35	11	P:GO:0000463; P:GO:0000055; C:GO:0005737; P:GO:0006351; F:GO:1901981; F:GO:0042134; C:GO:0043234; C:GO:0005730; P:GO:0000027; P:GO:0000466; C:GO:0030687	P:maturation of LSU-rRNA from tricistronic rRNA transcript (SSU-rRNA, 5.8S rRNA, LSU-rRNA); P:ribosomal large subunit export from nucleus; C:cytoplasm; P:transcription, DNA-templated; F:phosphatidylinositol phosphate binding; F:rRNA primary transcript binding; C:protein complex; C:nucleolus; P:ribosomal large subunit assembly; P:maturation of 5.8S rRNA from tricistronic rRNA transcript (SSU-rRNA,…	Coil (COILS); IPR007109 (SMART); IPR005607 (SMART); IPR005607 (G3DSA:1.10.3970.GENE3D); IPR013876 (PFAM); G3DSA:3.40.50.10480 (GENE3D); IPR007109 (PFAM); IPR005607 (PFAM); IPR011993 (G3DSA:2.30.29.GENE3D); mobidb-lite (MOBIDB_LITE); mobidb-lite (MOBIDB_LITE); mobidb-lite (MOBIDB_LITE); PTHR22734:SF5 (PANTHER); PTHR22734 (PANTHER); IPR005607 (PROSITE_PROFILES); IPR007109 (PROSITE_PROFILES); cd1322…	no GO terms	no GO terms
[INTERPRO, BLASTED]	gene_ID_unitig4_4	A0A1L0DLU4_9ASCOCIC11C00000001333 OS=	282	20	4.0794e-126	58.55	IPR002539 (PFAM); G3DSA:3.10.129.10 (GENE3D); G3DSA:3.10.129.10 (GENE3D); PTHR28152 (PANTHER); PTHR28152:SF3 (PANTHER); IPR029069 (SUPERFAMILY); TMhelix (TMHMM)	no GO terms	no GO terms
[INTERPRO, BLASTED, MAPPED, ANNOTATED]	gene_ID_unitig4_5	A0A1A0HKU6_9ASCOSuperoxide dismutase	154	20	6.8322e-101	88.95	5	C:GO:0005737; F:GO:0046872; P:GO:0019430; P:GO:0055114; F:GO:0004784	C:cytoplasm; F:metal ion binding; P:removal of superoxide radicals; P:oxidation-reduction process; F:superoxide dismutase activity	EC:1.15.1.1	Superoxide dismutase	IPR001424 (PRINTS); IPR001424 (G3DSA:2.60.40.GENE3D); IPR001424 (PFAM); PTHR10003 (PANTHER); PTHR10003:SF48 (PANTHER); IPR018152 (PROSITE_PATTERNS); IPR018152 (PROSITE_PATTERNS); IPR001424 (CDD); IPR001424 (SUPERFAMILY)	P:GO:0006801; F:GO:0046872; P:GO:0055114; F:GO:0004784
[INTERPRO, BLASTED, MAPPED, ANNOTATED]	gene_ID_unitig4_6	A0A1A0HKK0_9ASCOPhox OS=Metschnikowia bicuspidata bicuspidata NRRL YB-4993 GN=METBIDRAFT_36764 PE=4 SV=1	157	20	6.56037e-78	69.95	2	C:GO:0005768; C:GO:0016020	C:endosome; C:membrane	IPR001683 (SMART); IPR001683 (PFAM); IPR001683 (G3DSA:3.30.1520.GENE3D); PTHR10555 (PANTHER); PTHR10555:SF162 (PANTHER); IPR001683 (PROSITE_PROFILES); cd07280 (CDD); IPR001683 (SUPERFAMILY)	F:GO:0035091	F:phosphatidylinositol binding
[INTERPRO, BLASTED, MAPPED, ANNOTATED]	gene_ID_unitig4_7	A0A1A0HKG3_9ASCOThioredoxin reductase OS=Metschnikowia bicuspidata bicuspidata NRRL YB-4993 GN=METBIDRAFT_36616 PE=3 SV=1	320	20	0	89.25	7	C:GO:0005634; F:GO:0008198; P:GO:0019430; F:GO:0004791; C:GO:0005829; P:GO:0045454; P:GO:0055114	C:nucleus; F:ferrous iron binding; P:removal of superoxide radicals; F:thioredoxin-disulfide reductase activity; C:cytosol; P:cell redox homeostasis; P:oxidation-reduction process	EC:1.8.1.9	Thioredoxin-disulfide reductase	PR00368 (PRINTS); IPR000103 (PRINTS); IPR005982 (TIGRFAM); IPR023753 (PFAM); G3DSA:3.40.50.720 (GENE3D); G3DSA:3.40.50.720 (GENE3D); PTHR42863 (PANTHER); PTHR42863:SF9 (PANTHER); IPR008255 (PROSITE_PATTERNS); IPR023753 (SUPERFAMILY)	F:GO:0016491; C:GO:0005737; P:GO:0019430; F:GO:0004791; P:GO:0055114
[INTERPRO, BLASTED, MAPPED, ANNOTATED]	gene_ID_unitig4_8	A0A1A0HK09_9ASCOt-SNARE OS=Metschnikowia bicuspidata bicuspidata NRRL YB-4993 GN=METBIDRAFT_10650 PE=3 SV=1	293	20	1.54721e-153	70.15	8	C:GO:0043229; P:GO:0016192; P:GO:0046907; C:GO:0016020; P:GO:0016043; C:GO:0012505; C:GO:0044444; C:GO:0043227	C:intracellular organelle; P:vesicle-mediated transport; P:intracellular transport; C:membrane; P:cellular component organization; C:endomembrane system; C:cytoplasmic part; C:membrane-bounded organelle	Coil (COILS); Coil (COILS); Coil (COILS); IPR000727 (SMART); G3DSA:1.20.58.70 (GENE3D); G3DSA:1.20.5.110 (GENE3D); PF14523 (PFAM); IPR000727 (PFAM); PTHR19957:SF169 (PANTHER); PTHR19957 (PANTHER); IPR006012 (PROSITE_PATTERNS); IPR000727 (PROSITE_PROFILES); cd15840 (CDD); IPR010989 (SUPERFAMILY); TMhelix (TMHMM)	P:GO:0016192; C:GO:0016020; F:GO:0005484; P:GO:0006886	P:vesicle-mediated transport; C:membrane; F:SNAP receptor activity; P:intracellular protein transport
[INTERPRO, BLASTED, MAPPED, ANNOTATED]	gene_ID_unitig4_9	A0A1A0HL28_9ASCOProbable cytosolic iron-sulfur assembly 1 OS=Metschnikowia bicuspidata bicuspidata NRRL YB-4993 GN=CIA1 PE=3 SV=1	389	20	0	77.55	5	C:GO:0005634; P:GO:0000055; P:GO:0002098; C:GO:0097361; P:GO:0016226	C:nucleus; P:ribosomal large subunit export from nucleus; P:tRNA wobble uridine modification; C:CIA complex; P:iron-sulfur cluster assembly	IPR020472 (PRINTS); IPR001680 (SMART); IPR015943 (G3DSA:2.130.10.GENE3D); IPR015943 (G3DSA:2.130.10.GENE3D); G3DSA:2.40.50.140 (GENE3D); IPR001680 (PFAM); G3DSA:2.140.10.10 (GENE3D); PTHR19920:SF1 (PANTHER); PTHR19920 (PANTHER); IPR019775 (PROSITE_PATTERNS); IPR019775 (PROSITE_PATTERNS); IPR001680 (PROSITE_PROFILES); IPR017986 (PROSITE_PROFILES); IPR001680 (PROSITE_PROFILES); IPR001680 (PROSITE_P…	F:GO:0005515; C:GO:0097361; P:GO:0016226	F:protein binding; C:CIA complex; P:iron-sulfur cluster assembly
[INTERPRO, BLASTED, MAPPED]	gene_ID_unitig4_10	A0A1A0HKU1_9ASCO HIR OS=Metschnikowia bicuspidata bicuspidata NRRL YB-4993 GN=METBIDRAFT_10648 PE=3 SV=1	986	20	0	64.4	3	C:GO:0005634; P:GO:0006351; P:GO:0006355	C:nucleus; P:transcription, DNA-templated; P:regulation of transcription, DNA-templated	IPR001680 (SMART); IPR001680 (PFAM); G3DSA:2.140.10.30 (GENE3D); IPR015943 (G3DSA:2.130.10.GENE3D); IPR015943 (G3DSA:2.130.10.GENE3D); IPR011494 (PFAM); IPR019015 (PFAM); mobidb-lite (MOBIDB_LITE); IPR031120 (PANTHER); PTHR13831:SF2 (PANTHER); IPR017986 (PROSITE_PROFILES); IPR001680 (PROSITE_PROFILES); SSF75011 (SUPERFAMILY); IPR017986 (SUPERFAMILY)	C:GO:0005634; F:GO:0005515; P:GO:0006351; P:GO:0006355; P:GO:0006325	C:nucleus; F:protein binding; P:transcription, DNA-templated; P:regulation of transcription, DNA-templated; P:chromatin organization
[INTERPRO, BLASTED, MAPPED, ANNOTATED]	gene_ID_unitig4_11	Q6BIR6_DEBHADEHA2G08206p OS=Debaryomyces hansenii (strain ATCC 36239 CBS 767 JCM 1990 NBRC 0083 IGC 2968) GN=DEHA2G08206g PE=4 SV=1	243	20	1.87016e-153	89.35	10	C:GO:0005956; F:GO:0030291; C:GO:0034456; P:GO:0006468; P:GO:0006974; P:GO:0071901; F:GO:0016301; P:GO:0006359; P:GO:0006356; C:GO:0032545	C:protein kinase CK2 complex; F:protein serine/threonine kinase inhibitor activity; C:UTP-C complex; P:protein phosphorylation; P:cellular response to DNA damage stimulus; P:negative regulation of protein serine/threonine kinase activity; F:kinase activity; P:regulation of transcription from RNA polymerase III promoter; P:regulation of transcription from RNA polymerase I promoter; C:CURI complex	IPR000704 (PRINTS); IPR000704 (SMART); G3DSA:2.20.25.20 (GENE3D); IPR000704 (PFAM); IPR016149 (G3DSA:1.10.1820.GENE3D); PTHR22746:SF14 (PANTHER); PTHR22746 (PANTHER); IPR000704 (PROSITE_PATTERNS); IPR000704 (SUPERFAMILY)	C:GO:0005956; F:GO:0019887	C:protein kinase CK2 complex; F:protein kinase regulator activity
[INTERPRO, BLASTED, MAPPED, ANNOTATED]	gene_ID_unitig4_12	A0A1A0HKF9_9ASCOTryptophanyl-tRNA synthetase OS=Metschnikowia bicuspidata bicuspidata NRRL YB-4993 GN=METBIDRAFT_35514 PE=3 SV=1	368	20	0	79.5	4	F:GO:0005524; P:GO:0070183; C:GO:0005739; F:GO:0004830	F:ATP binding; P:mitochondrial tryptophanyl-tRNA aminoacylation; C:mitochondrion; F:tryptophan-tRNA ligase activity	EC:6.1.1.2	Tryptophan--tRNA ligase	IPR002306 (PRINTS); IPR002305 (PFAM); IPR002306 (TIGRFAM); G3DSA:1.10.240.10 (GENE3D); IPR014729 (G3DSA:3.40.50.GENE3D); PTHR43766 (PANTHER); IPR001412 (PROSITE_PATTERNS); IPR002306 (CDD); SSF52374 (SUPERFAMILY)	F:GO:0000166; F:GO:0005524; P:GO:0006418; F:GO:0004812; C:GO:0005737; P:GO:0006436; F:GO:0004830
[INTERPRO, BLASTED, MAPPED, ANNOTATED]	gene_ID_unitig4_13	A0A1L0G440_9ASCOCIC11C00000005419 OS=	742	20	0	62.5	1	F:GO:0005488	F:binding	IPR013088 (G3DSA:3.30.50.GENE3D); mobidb-lite (MOBIDB_LITE); mobidb-lite (MOBIDB_LITE); mobidb-lite (MOBIDB_LITE); mobidb-lite (MOBIDB_LITE); mobidb-lite (MOBIDB_LITE); PTHR39147 (PANTHER); IPR000679 (PROSITE_PROFILES); SSF57716 (SUPERFAMILY)	F:GO:0008270; F:GO:0003700; P:GO:0006355; F:GO:0043565	F:zinc ion binding; F:transcription factor activity, sequence-specific DNA binding; P:regulation of transcription, DNA-templated; F:sequence-specific DNA binding
[INTERPRO, BLASTED, MAPPED]	gene_ID_unitig5_1	A0A1L0D2Z5_9ASCOCIC11C00000003577 OS=	891	20	0	53	5	P:GO:0008150; C:GO:0016020; C:GO:0016021; C:GO:0005575; F:GO:0003674	P:biological_process; C:membrane; C:integral component of membrane; C:cellular_component; F:molecular_function	Coil (COILS); Coil (COILS); Coil (COILS); Coil (COILS); G3DSA:1.20.5.340 (GENE3D); G3DSA:1.20.5.320 (GENE3D); mobidb-lite (MOBIDB_LITE); mobidb-lite (MOBIDB_LITE); PTHR43696 (PANTHER); SSF57997 (SUPERFAMILY); TMhelix (TMHMM); TMhelix (TMHMM)	no GO terms	no GO terms
[INTERPRO, BLASTED, MAPPED]	gene_ID_unitig5_2	A0A1L0BJF7_9ASCOCIC11C00000005839 OS=	182	20	1.22438e-98	68.25	4	F:GO:0010181; F:GO:0016491; P:GO:0055114; C:GO:0005575	F:FMN binding; F:oxidoreductase activity; P:oxidation-reduction process; C:cellular_component	IPR002563 (SMART); IPR012349 (G3DSA:2.30.110.GENE3D); IPR002563 (PFAM); PTHR30466 (PANTHER); PTHR30466:SF10 (PANTHER); IPR012349 (SUPERFAMILY)	F:GO:0010181; F:GO:0048037	F:FMN binding; F:cofactor binding
[INTERPRO, BLASTED, MAPPED]	gene_ID_unitig5_3	A0A1L0D1J8_9ASCOCIC11C00000004632 OS=	1614	20	0	51.5	6	C:GO:0005634; F:GO:0003824; P:GO:0008152; P:GO:0006508; F:GO:0008233; F:GO:0016787	C:nucleus; F:catalytic activity; P:metabolic process; P:proteolysis; F:peptidase activity; F:hydrolase activity	Coil (COILS); PF03568 (PFAM); mobidb-lite (MOBIDB_LITE); IPR005314 (PANTHER); IPR030397 (PROSITE_PROFILES)	C:GO:0005634; P:GO:0006508; F:GO:0008233	C:nucleus; P:proteolysis; F:peptidase activity
[INTERPRO, BLASTED, MAPPED, ANNOTATED]	gene_ID_unitig5_4	A0A1L0DD53_9ASCOCIC11C00000005187 OS=	810	20	0	64.55	7	C:GO:0005634; C:GO:0032153; F:GO:0046872; C:GO:0005829; C:GO:0044732; P:GO:0006513; P:GO:0007116	C:nucleus; C:cell division site; F:metal ion binding; C:cytosol; C:mitotic spindle pole body; P:protein monoubiquitination; P:regulation of cell budding	IPR011989 (G3DSA:1.25.10.GENE3D); IPR002893 (PFAM); mobidb-lite (MOBIDB_LITE); mobidb-lite (MOBIDB_LITE); mobidb-lite (MOBIDB_LITE); mobidb-lite (MOBIDB_LITE); PTHR12197:SF233 (PANTHER); PTHR12197 (PANTHER); IPR002893 (PROSITE_PROFILES); SSF144232 (SUPERFAMILY)	no GO terms	no GO terms
[INTERPRO, BLASTED, MAPPED]	gene_ID_unitig5_5	A0A1L0D304_9ASCOCIC11C00000005272 OS=	245	20	7.60131e-142	57.8	6	P:GO:0008150; P:GO:0016311; C:GO:0005575; F:GO:0016158; F:GO:0003674; F:GO:0016787	P:biological_process; P:dephosphorylation; C:cellular_component; F:3-phytase activity; F:molecular_function; F:hydrolase activity	PF11274 (PFAM); IPR023393 (G3DSA:3.30.530.GENE3D); PTHR40370 (PANTHER); SSF55961 (SUPERFAMILY)	no GO terms	no GO terms
[INTERPRO, BLASTED, MAPPED, ANNOTATED]	gene_ID_unitig5_6	A0A1A0HIX9_9ASCOp-loop containing nucleoside triphosphate hydrolase OS=Metschnikowia bicuspidata bicuspidata NRRL YB-4993 GN=METBIDRAFT_30330 PE=4 SV=1	1509	20	0	66.05	2	C:GO:0043229; P:GO:0006259	C:intracellular organelle; P:DNA metabolic process	Coil (COILS); IPR003593 (SMART); IPR003959 (PFAM); G3DSA:1.10.8.60 (GENE3D); G3DSA:3.40.50.300 (GENE3D); mobidb-lite (MOBIDB_LITE); mobidb-lite (MOBIDB_LITE); PTHR23389 (PANTHER); PTHR23389:SF11 (PANTHER); cd00009 (CDD); IPR027417 (SUPERFAMILY)	F:GO:0005524	F:ATP binding
[INTERPRO, BLASTED, MAPPED, ANNOTATED]	gene_ID_unitig5_7	A0A1L0BFG2_9ASCOCIC11C00000003165 OS=	299	20	0	87.25	14	C:GO:0060187; P:GO:0010570; C:GO:0032153; P:GO:0015031; C:GO:0000139; P:GO:0006892; F:GO:0008526; F:GO:0008525; C:GO:0005634; P:GO:0006657; C:GO:0005628; C:GO:0035838; P:GO:0015914; P:GO:0031322	C:cell pole; P:regulation of filamentous growth; C:cell division site; P:protein transport; C:Golgi membrane; P:post-Golgi vesicle-mediated transport; F:phosphatidylinositol transporter activity; F:phosphatidylcholine transporter activity; C:nucleus; P:CDP-choline pathway; C:prospore membrane; C:growing cell tip; P:phospholipid transport; P:ascospore-type prospore-specific spindle pole body remod…	IPR001071 (PRINTS); IPR011074 (SMART); IPR001251 (SMART); IPR011074 (PFAM); IPR001251 (G3DSA:3.40.525.GENE3D); IPR001251 (PFAM); PTHR23324 (PANTHER); PTHR23324:SF113 (PANTHER); IPR001251 (PROSITE_PROFILES); IPR001251 (CDD); IPR011074 (SUPERFAMILY); IPR001251 (SUPERFAMILY)	P:GO:0006810; C:GO:0005622; F:GO:0005215	P:transport; C:intracellular; F:transporter activity
[INTERPRO, BLASTED, MAPPED, ANNOTATED]	gene_ID_unitig5_8	A0A1A0HJA9_9ASCORho GTPase activation OS=Metschnikowia bicuspidata bicuspidata NRRL YB-4993 GN=METBIDRAFT_36529 PE=4 SV=1	1183	20	0	68.05	16	C:GO:0009277; P:GO:0007264; F:GO:0005096; P:GO:0007015; P:GO:0007114; P:GO:0009652; P:GO:0009405; C:GO:0001411; P:GO:0030448; C:GO:0000131; C:GO:0005935; P:GO:0000282; P:GO:0043087; P:GO:0030011; P:GO:0071257; P:GO:0051666	C:fungal-type cell wall; P:small GTPase mediated signal transduction; F:GTPase activator activity; P:actin filament organization; P:cell budding; P:thigmotropism; P:patho_	genesis; C:hyphal tip; P:hyphal growth; C:incipient cellular bud site; C:cellular bud neck; P:cellular bud site selection; P:regulation of GTPase activity; P:maintenance of cell polarity; P:cellular response to electrical stimulus; P:actin cortical patch localization	IPR001936 (SMART); IPR000008 (SMART); G3DSA:1.10.506.10 (GENE3D); IPR000008 (PFAM); IPR001936 (PFAM); IPR000008 (G3DSA:2.60.40.GENE3D); mobidb-lite (MOBIDB_LITE); mobidb-lite (MOBIDB_LITE); PTHR10194:SF121 (PANTHER); PTHR10194 (PANTHER); IPR023152 (PROSITE_PATTERNS); IPR001936 (PROSITE_PROFILES); IPR000008 (PROSITE_PROFILES); cd00030 (CDD); cd05137 (CDD); IPR000008 (SUPERFAMILY); IPR008936 (SUPER…	P:GO:0007165; P:GO:0043087	P:signal transduction; P:regulation of GTPase activity
[INTERPRO, BLASTED, MAPPED, ANNOTATED]	gene_ID_unitig5_9	A0A1L0G0X1_9ASCOCIC11C00000005605 OS=	960	20	0	70.6	4	F:GO:0000166; P:GO:0000184; F:GO:0043167; F:GO:0016787	F:nucleotide binding; P:nuclear-transcribed mRNA catabolic process, nonsense-mediated decay; F:ion binding; F:hydrolase activity	Coil (COILS); IPR003593 (SMART); PF13086 (PFAM); PF13087 (PFAM); G3DSA:3.40.50.300 (GENE3D); IPR018999 (PFAM); G3DSA:3.40.50.300 (GENE3D); mobidb-lite (MOBIDB_LITE); PTHR10887:SF414 (PANTHER); PTHR10887 (PANTHER); cd00046 (CDD); IPR027417 (SUPERFAMILY)	F:GO:0003677; F:GO:0005524; F:GO:0008270; P:GO:0000184; C:GO:0005737; F:GO:0004386	F:DNA binding; F:ATP binding; F:zinc ion binding; P:nuclear-transcribed mRNA catabolic process, nonsense-mediated decay; C:cytoplasm; F:helicase activity
[INTERPRO, BLASTED, MAPPED, ANNOTATED]	gene_ID_unitig5_10	A0A1L0BG12_9ASCOCIC11C00000003979 OS=	93	20	4.27642e-46	70.75	1	C:GO:0016020	C:membrane	TMhelix (TMHMM)	no GO terms	no GO terms
[INTERPRO, BLASTED, MAPPED, ANNOTATED]	gene_ID_unitig5_11	A0A1A0HIY4_9ASCOPhospholipid-transporting ATPase OS=Metschnikowia bicuspidata bicuspidata NRRL YB-4993 GN=METBIDRAFT_34674 PE=3 SV=1	1724	20	0	76.3	5	F:GO:0000287; F:GO:0005524; P:GO:0045332; C:GO:0016021; F:GO:0004012	F:magnesium ion binding; F:ATP binding; P:phospholipid translocation; C:integral component of membrane; F:phospholipid-translocating ATPase activity	EC:3.6.1.3; EC:3.6.3.1; EC:3.6.1.15	Adenosinetriphosphatase; Phospholipid-translocating ATPase; Nucleoside-triphosphate phosphatase	SM00212 (SMART); IPR023299 (G3DSA:3.40.1110.GENE3D); IPR006539 (TIGRFAM); PF00122 (PFAM); IPR016135 (G3DSA:3.10.110.GENE3D); IPR000608 (PFAM); IPR032630 (PFAM); PF13246 (PFAM); G3DSA:2.70.150.10 (GENE3D); IPR001757 (TIGRFAM); IPR023214 (G3DSA:3.40.50.GENE3D); IPR032631 (PFAM); mobidb-lite (MOBIDB_LITE); mobidb-lite (MOBIDB_LITE); mobidb-lite (MOBIDB_LITE); mobidb-lite (MOBIDB_LITE); mobidb-lite (…	F:GO:0000166; F:GO:0000287; F:GO:0005524; C:GO:0016021; P:GO:0015914; F:GO:0004012
[INTERPRO, BLASTED, MAPPED, ANNOTATED]	gene_ID_unitig5_12	A0A1A0HIZ8_9ASCOMitochondrial carrier OS=Metschnikowia bicuspidata bicuspidata NRRL YB-4993 GN=METBIDRAFT_37689 PE=3 SV=1	300	20	0	95.5	5	P:GO:0055085; C:GO:0016021; C:GO:0005743; C:GO:0005886; F:GO:0005215	P:transmembrane transport; C:integral component of membrane; C:mitochondrial inner membrane; C:plasma membrane; F:transporter activity	IPR002113 (PRINTS); IPR002067 (PRINTS); IPR018108 (PFAM); IPR023395 (G3DSA:1.50.40.GENE3D); PTHR24089 (PANTHER); PTHR24089:SF453 (PANTHER); IPR018108 (PROSITE_PROFILES); IPR018108 (PROSITE_PROFILES); IPR018108 (PROSITE_PROFILES); IPR023395 (SUPERFAMILY); TMhelix (TMHMM); TMhelix (TMHMM); TMhelix (TMHMM)	P:GO:0055085; P:GO:0006810; C:GO:0005743; F:GO:0005215	P:transmembrane transport; P:transport; C:mitochondrial inner membrane; F:transporter activity
[INTERPRO, BLASTED, MAPPED, ANNOTATED]	gene_ID_unitig9_1	A0A1L0D5Z7_9ASCOCIC11C00000000713 OS=	501	20	0	63.2	4	P:GO:0000122; C:GO:0005634; F:GO:0043565; P:GO:0048518	P:negative regulation of transcription from RNA polymerase II promoter; C:nucleus; F:sequence-specific DNA binding; P:positive regulation of biological process	IPR013087 (SMART); G3DSA:3.30.160.60 (GENE3D); PF00096 (PFAM); G3DSA:3.30.160.60 (GENE3D); G3DSA:2.20.25.10 (GENE3D); mobidb-lite (MOBIDB_LITE); mobidb-lite (MOBIDB_LITE); mobidb-lite (MOBIDB_LITE); mobidb-lite (MOBIDB_LITE); mobidb-lite (MOBIDB_LITE); PTHR14596 (PANTHER); IPR013087 (PROSITE_PATTERNS); IPR013087 (PROSITE_PATTERNS); IPR013087 (PROSITE_PROFILES); IPR013087 (PROSITE_PROFILES); IPR01…	F:GO:0003676	F:nucleic acid binding
[INTERPRO, BLASTED, MAPPED]	gene_ID_unitig9_2	A0A1L0D2B4_9ASCOCIC11C00000003466 OS=	919	20	0	57.5	10	F:GO:0003677; C:GO:0005634; F:GO:0008270; P:GO:0006351; F:GO:0046872; C:GO:0016020; C:GO:0016021; P:GO:0006355; F:GO:0000981; P:GO:0006357	F:DNA binding; C:nucleus; F:zinc ion binding; P:transcription, DNA-templated; F:metal ion binding; C:membrane; C:integral component of membrane; P:regulation of transcription, DNA-templated; F:RNA polymerase II transcription factor activity, sequence-specific DNA binding; P:regulation of transcription from RNA polymerase II promoter	IPR001138 (SMART); IPR007219 (SMART); IPR001138 (G3DSA:4.10.240.GENE3D); IPR001138 (PFAM); IPR007219 (PFAM); mobidb-lite (MOBIDB_LITE); mobidb-lite (MOBIDB_LITE); mobidb-lite (MOBIDB_LITE); PTHR31944:SF106 (PANTHER); PTHR31944 (PANTHER); IPR001138 (PROSITE_PATTERNS); IPR001138 (PROSITE_PROFILES); IPR001138 (CDD); cd12148 (CDD); IPR001138 (SUPERFAMILY)	C:GO:0005634; F:GO:0003677; F:GO:0008270; P:GO:0006351; P:GO:0006355; F:GO:0000981	C:nucleus; F:DNA binding; F:zinc ion binding; P:transcription, DNA-templated; P:regulation of transcription, DNA-templated; F:RNA polymerase II transcription factor activity, sequence-specific DNA binding
[INTERPRO, BLASTED, MAPPED]	gene_ID_unitig9_3	A0A1L0BK83_9ASCOCIC11C00000004557 OS=	272	20	3.5661e-107	56.1	5	P:GO:0008150; F:GO:0019901; C:GO:0005575; F:GO:0003674; P:GO:0000079	P:biological_process; F:protein kinase binding; C:cellular_component; F:molecular_function; P:regulation of cyclin-dependent protein serine/threonine kinase activity	IPR006671 (PFAM); IPR013763 (G3DSA:1.10.472.GENE3D); PTHR15615 (PANTHER); IPR013763 (SUPERFAMILY)	no GO terms	no GO terms
[INTERPRO, BLASTED, MAPPED, ANNOTATED]	gene_ID_unitig9_4	A0A1A0HK50_9ASCOGluconolactonase ly OS=Metschnikowia bicuspidata bicuspidata NRRL YB-4993 GN=METBIDRAFT_77027 PE=4 SV=1	331	20	1.41135e-166	65.65	1	P:GO:0030308	P:negative regulation of cell growth	IPR005511 (PRINTS); IPR013658 (PFAM); IPR011042 (G3DSA:2.120.10.GENE3D); PTHR10907:SF67 (PANTHER); PTHR10907 (PANTHER); SSF63829 (SUPERFAMILY)	no GO terms	no GO terms
[INTERPRO, BLASTED]	gene_ID_unitig9_5	A0A1L0BGP6_9ASCOCIC11C00000005561 OS=	153	20	1.12394e-56	62.4	IPR007529 (PFAM); PTHR13483 (PANTHER); PTHR13483:SF12 (PANTHER); IPR007529 (PROSITE_PROFILES); SSF144232 (SUPERFAMILY)	no GO terms	no GO terms
[INTERPRO, BLASTED, MAPPED, ANNOTATED]	gene_ID_unitig9_6	A0A1A0HJW5_9ASCOD123-domain-containing OS=Metschnikowia bicuspidata bicuspidata NRRL YB-4993 GN=METBIDRAFT_10341 PE=4 SV=1	343	20	0	69.1	4	C:GO:0005737; F:GO:0043167; P:GO:0051726; P:GO:0007049	C:cytoplasm; F:ion binding; P:regulation of cell cycle; P:cell cycle	IPR009772 (PFAM); mobidb-lite (MOBIDB_LITE); IPR009772 (PTHR15323:PANTHER); PTHR15323 (PANTHER)	P:GO:0007049	P:cell cycle
[INTERPRO, BLASTED, MAPPED, ANNOTATED]	gene_ID_unitig9_7	A0A1A0HE56_9ASCORtt106-domain-containing OS=Metschnikowia bicuspidata bicuspidata NRRL YB-4993 GN=METBIDRAFT_77727 PE=4 SV=1	387	20	2.79857e-122	53.25	1	P:GO:0009987	P:cellular process	Coil (COILS); IPR013719 (SMART); IPR013719 (PFAM); mobidb-lite (MOBIDB_LITE); IPR011993 (SUPERFAMILY)	no GO terms	no GO terms
[INTERPRO, BLASTED, MAPPED, ANNOTATED]	gene_ID_unitig9_8	A0A1A0HJK3_9ASCOT-complex 1 subunit delta OS=Metschnikowia bicuspidata bicuspidata NRRL YB-4993 GN=METBIDRAFT_38485 PE=3 SV=1	531	20	0	93.5	5	C:GO:0005634; C:GO:0005832; F:GO:0005524; F:GO:0051082; P:GO:0006457	C:nucleus; C:chaperonin-containing T-complex; F:ATP binding; F:unfolded protein binding; P:protein folding	IPR017998 (PRINTS); IPR012717 (TIGRFAM); IPR002423 (PFAM); IPR027413 (G3DSA:1.10.560.GENE3D); IPR027409 (G3DSA:3.50.7.GENE3D); IPR027413 (G3DSA:1.10.560.GENE3D); mobidb-lite (MOBIDB_LITE); PTHR11353 (PANTHER); IPR012717 (PTHR11353:PANTHER); IPR002194 (PROSITE_PATTERNS); IPR002194 (PROSITE_PATTERNS); IPR002194 (PROSITE_PATTERNS); IPR012717 (CDD); SSF54849 (SUPERFAMILY); IPR027409 (SUPERFAMILY); SS…	F:GO:0005524; F:GO:0051082; P:GO:0006457	F:ATP binding; F:unfolded protein binding; P:protein folding
[INTERPRO, BLASTED, MAPPED, ANNOTATED]	gene_ID_unitig9_9	A0A1L0BK76_9ASCOCIC11C00000000506 OS=	547	20	0	68.55	3	C:GO:0005634; P:GO:0000462; P:GO:0000479	C:nucleus; P:maturation of SSU-rRNA from tricistronic rRNA transcript (SSU-rRNA, 5.8S rRNA, LSU-rRNA); P:endonucleolytic cleavage of tricistronic rRNA transcript (SSU-rRNA, 5.8S rRNA, LSU-rRNA)	Coil (COILS); Coil (COILS); IPR018972 (PFAM); G3DSA:3.10.450.50 (GENE3D); mobidb-lite (MOBIDB_LITE); mobidb-lite (MOBIDB_LITE); mobidb-lite (MOBIDB_LITE); mobidb-lite (MOBIDB_LITE); mobidb-lite (MOBIDB_LITE); PTHR13237:SF10 (PANTHER); PTHR13237 (PANTHER)	no GO terms	no GO terms
[INTERPRO, BLASTED]	gene_ID_unitig9_10	A0A1A0HGS0_9ASCOUncharacterized protein OS=Metschnikowia bicuspidata var. bicuspidata NRRL YB-4993 GN=METBIDRAFT_29616 PE=4 SV=1	430	1	1.18203e-10	42	no IPS match	no IPS match	no IPS match
[INTERPRO, BLASTED, MAPPED, ANNOTATED]	gene_ID_unitig9_11	A0A1L0BG52_9ASCOCIC11C00000003868 OS=	401	20	9.41553e-110	55.15	1	F:GO:0016740	F:transferase activity	IPR007811 (PFAM); mobidb-lite (MOBIDB_LITE); mobidb-lite (MOBIDB_LITE); mobidb-lite (MOBIDB_LITE); mobidb-lite (MOBIDB_LITE); mobidb-lite (MOBIDB_LITE); IPR007811 (PANTHER); PTHR13408:SF9 (PANTHER)	F:GO:0003677; F:GO:0003899; P:GO:0006383; C:GO:0005666	F:DNA binding; F:DNA-directed 5'-3' RNA polymerase activity; P:transcription from RNA polymerase III promoter; C:DNA-directed RNA polymerase III complex
[INTERPRO, BLASTED, MAPPED, ANNOTATED]	gene_ID_unitig9_12	A0A1A0HJJ7_9ASCORNA helicase OS=Metschnikowia bicuspidata bicuspidata NRRL YB-4993 GN=METBIDRAFT_10335 PE=3 SV=1	989	20	0	84.5	7	C:GO:0032040; F:GO:0005524; F:GO:0003723; C:GO:0005829; P:GO:0006364; C:GO:0005730; F:GO:0004004	C:small-subunit processome; F:ATP binding; F:RNA binding; C:cytosol; P:rRNA processing; C:nucleolus; F:ATP-dependent RNA helicase activity	EC:3.6.1.3; EC:3.6.1.15	Adenosinetriphosphatase; Nucleoside-triphosphate phosphatase	Coil (COILS); Coil (COILS); IPR025313 (SMART); IPR014001 (SMART); IPR001650 (SMART); IPR011545 (PFAM); IPR001650 (PFAM); IPR025313 (PFAM); G3DSA:3.40.50.300 (GENE3D); IPR013921 (PFAM); G3DSA:3.40.50.300 (GENE3D); mobidb-lite (MOBIDB_LITE); PTHR24031 (PANTHER); PTHR24031:SF473 (PANTHER); IPR000629 (PROSITE_PATTERNS); IPR014014 (PROSITE_PROFILES); IPR014001 (PROSITE_PROFILES); IPR001650 (PROSITE_PR…	F:GO:0003676; F:GO:0005524; C:GO:0016592; F:GO:0001104; P:GO:0006357
[INTERPRO, BLASTED, MAPPED, ANNOTATED]	gene_ID_unitig9_13	A0A1L0BDP0_9ASCOCIC11C00000005291 OS=	802	20	0	71.45	4	P:GO:0044260; C:GO:0005737; P:GO:0044238; P:GO:0043412	P:cellular macromolecule metabolic process; C:cytoplasm; P:primary metabolic process; P:macromolecule modification	Coil (COILS); IPR020472 (PRINTS); IPR001680 (SMART); IPR001680 (PFAM); IPR015943 (G3DSA:2.130.10.GENE3D); G3DSA:2.40.50.140 (GENE3D); IPR015943 (G3DSA:2.130.10.GENE3D); IPR015943 (G3DSA:2.130.10.GENE3D); G3DSA:2.80.10.50 (GENE3D); mobidb-lite (MOBIDB_LITE); PTHR42968 (PANTHER); PTHR42968:SF6 (PANTHER); IPR019775 (PROSITE_PATTERNS); IPR001680 (PROSITE_PROFILES); IPR001680 (PROSITE_PROFILES); IPR01…	F:GO:0005515	F:protein binding
[INTERPRO, BLASTED, MAPPED, ANNOTATED]	gene_ID_unitig9_14	A0A1A0HK35_9ASCOClathrin light chain OS=Metschnikowia bicuspidata bicuspidata NRRL YB-4993 GN=METBIDRAFT_118879 PE=3 SV=1	218	20	2.36816e-118	73.5	8	P:GO:0031505; C:GO:0005768; C:GO:0030130; P:GO:0045807; C:GO:0030132; F:GO:0005198; P:GO:0006886; P:GO:0006897	P:fungal-type cell wall organization; C:endosome; C:clathrin coat of trans-Golgi network vesicle; P:positive regulation of endocytosis; C:clathrin coat of coated pit; F:structural molecule activity; P:intracellular protein transport; P:endocytosis	Coil (COILS); Coil (COILS); Coil (COILS); IPR000996 (PFAM); mobidb-lite (MOBIDB_LITE); mobidb-lite (MOBIDB_LITE); PTHR10639:SF12 (PANTHER); IPR000996 (PANTHER)	P:GO:0016192; C:GO:0030130; F:GO:0005198; C:GO:0030132; P:GO:0006886	P:vesicle-mediated transport; C:clathrin coat of trans-Golgi network vesicle; F:structural molecule activity; C:clathrin coat of coated pit; P:intracellular protein transport
[INTERPRO, BLASTED, MAPPED]	gene_ID_unitig9_15	A0A1L0BEM5_9ASCOCIC11C00000005048 OS=	394	20	1.55551e-96	52.85	5	P:GO:0008150; C:GO:0016020; C:GO:0016021; C:GO:0005575; F:GO:0003674	P:biological_process; C:membrane; C:integral component of membrane; C:cellular_component; F:molecular_function	TMhelix (TMHMM); TMhelix (TMHMM); TMhelix (TMHMM)	no GO terms	no GO terms
[INTERPRO, BLASTED]	gene_ID_unitig9_16	C4Y166_CLAL4Uncharacterized protein OS=Clavispora lusitaniae (strain ATCC 42720) GN=CLUG_01948 PE=4 SV=1	142	1	0.000152791	44	no IPS match	no IPS match	no IPS match
[INTERPRO, BLASTED, MAPPED]	gene_ID_unitig9_17	A0A1L0BDN0_9ASCOCIC11C00000003544 OS=	440	20	6.04115e-63	48.4	5	P:GO:0008150; C:GO:0005737; C:GO:0005575; F:GO:0003674; F:GO:0016853	P:biological_process; C:cytoplasm; C:cellular_component; F:molecular_function; F:isomerase activity	Coil (COILS); mobidb-lite (MOBIDB_LITE); mobidb-lite (MOBIDB_LITE); mobidb-lite (MOBIDB_LITE); mobidb-lite (MOBIDB_LITE)	no GO terms	no GO terms
[INTERPRO, BLASTED, MAPPED, ANNOTATED]	gene_ID_unitig9_18	A0A1A0HJH5_9ASCOF-actin capping beta subunit OS=Metschnikowia bicuspidata bicuspidata NRRL YB-4993 GN=METBIDRAFT_36834 PE=4 SV=1	289	20	0	79.85	13	C:GO:0032153; C:GO:0043332; C:GO:0005884; P:GO:1902404; F:GO:0051015; C:GO:0005634; P:GO:0030447; P:GO:0051016; C:GO:0051286; C:GO:0005829; C:GO:0008290; P:GO:0030036; C:GO:0030479	C:cell division site; C:mating projection tip; C:actin filament; P:mitotic actomyosin contractile ring contraction; F:actin filament binding; C:nucleus; P:filamentous growth; P:barbed-end actin filament capping; C:cell tip; C:cytosol; C:F-actin capping protein complex; P:actin cytoskeleton organization; C:actin cortical patch	IPR001698 (PRINTS); IPR001698 (PFAM); IPR001698 (PANTHER); IPR019771 (PROSITE_PATTERNS); SSF90096 (SUPERFAMILY)	P:GO:0051016; F:GO:0003779; C:GO:0005737; C:GO:0008290; P:GO:0030036	P:barbed-end actin filament capping; F:actin binding; C:cytoplasm; C:F-actin capping protein complex; P:actin cytoskeleton organization
[INTERPRO, BLASTED, MAPPED, ANNOTATED]	gene_ID_unitig9_19	A0A1A0HJ31_9ASCOPhosphate transporter OS=Metschnikowia bicuspidata bicuspidata NRRL YB-4993 GN=METBIDRAFT_38294 PE=3 SV=1	567	20	0	79	8	F:GO:0005315; F:GO:0042802; C:GO:0016021; F:GO:0015319; F:GO:0048249; P:GO:0035725; C:GO:0005886; P:GO:0035435	F:inorganic phosphate transmembrane transporter activity; F:identical protein binding; C:integral component of membrane; F:sodium:inorganic phosphate symporter activity; F:high-affinity phosphate transmembrane transporter activity; P:sodium ion transmembrane transport; C:plasma membrane; P:phosphate ion transmembrane transport	IPR001204 (PFAM); mobidb-lite (MOBIDB_LITE); IPR001204 (PANTHER); PTHR11101:SF70 (PANTHER); TMhelix (TMHMM); TMhelix (TMHMM); TMhelix (TMHMM); TMhelix (TMHMM); TMhelix (TMHMM); TMhelix (TMHMM); TMhelix (TMHMM); TMhelix (TMHMM); TMhelix (TMHMM)	F:GO:0005315; P:GO:0006817; C:GO:0016020	F:inorganic phosphate transmembrane transporter activity; P:phosphate ion transport; C:membrane
[INTERPRO, BLASTED]	gene_ID_unitig9_20	A0A1L0D5Q3_9ASCOCIC11C00000002606 OS=	1128	20	0	48.95	IPR005135 (G3DSA:3.60.10.GENE3D); IPR000477 (PFAM); G3DSA:3.30.70.270 (GENE3D); PTHR19446 (PANTHER); PTHR19446:SF418 (PANTHER); IPR000477 (PROSITE_PROFILES); cd01650 (CDD); IPR005135 (SUPERFAMILY); SSF56672 (SUPERFAMILY)	no GO terms	no GO terms
[INTERPRO, BLASTED, MAPPED, ANNOTATED]	gene_ID_unitig9_21	A0A1A0HJU6_9ASCOHIRA-interacting 5 OS=Metschnikowia bicuspidata bicuspidata NRRL YB-4993 GN=METBIDRAFT_10327 PE=4 SV=1	252	20	5.2283e-152	84.4	8	F:GO:0015078; C:GO:0005759; F:GO:0005506; C:GO:0045263; P:GO:0006880; F:GO:0051536; P:GO:0015986; P:GO:0016226	F:hydrogen ion transmembrane transporter activity; C:mitochondrial matrix; F:iron ion binding; C:proton-transporting ATP synthase complex, coupling factor F(o); P:intracellular sequestering of iron ion; F:iron-sulfur cluster binding; P:ATP synthesis coupled proton transport; P:iron-sulfur cluster assembly	IPR014824 (SMART); IPR034904 (G3DSA:3.30.300.GENE3D); IPR014824 (G3DSA:3.30.1370.GENE3D); IPR001075 (PFAM); PIRSF036773 (PIRSF); IPR014824 (PFAM); PTHR11178:SF34 (PANTHER); PTHR11178 (PANTHER); IPR001075 (PRODOM); IPR034904 (SUPERFAMILY); IPR014824 (SUPERFAMILY)	F:GO:0005506; F:GO:0051536; P:GO:0016226	F:iron ion binding; F:iron-sulfur cluster binding; P:iron-sulfur cluster assembly
[INTERPRO, BLASTED, MAPPED, ANNOTATED]	gene_ID_unitig9_22	A0A1L0BDM7_9ASCOCIC11C00000003393 OS=	578	20	0	62.3	1	C:GO:0016020	C:membrane	PTHR38644 (PANTHER); PTHR38644:SF2 (PANTHER)	no GO terms	no GO terms
[INTERPRO, BLASTED, MAPPED, ANNOTATED]	gene_ID_unitig9_23	A0A1L0DB60_9ASCOCIC11C00000005237 OS=	526	20	0	57	1	P:GO:0006325	P:chromatin organization	mobidb-lite (MOBIDB_LITE)	no GO terms	no GO terms
[INTERPRO, BLASTED, MAPPED, ANNOTATED]	gene_ID_unitig9_24	A0A1A0HJH0_9ASCONatural resistance-associated macrophage OS=Metschnikowia bicuspidata bicuspidata NRRL YB-4993 GN=METBIDRAFT_37134 PE=4 SV=1	541	20	0	80.1	6	P:GO:0006879; P:GO:0006826; C:GO:0000329; C:GO:0016021; C:GO:0005886; F:GO:0005215	P:cellular iron ion homeostasis; P:iron ion transport; C:fungal-type vacuole membrane; C:integral component of membrane; C:plasma membrane; F:transporter activity	IPR001046 (PRINTS); IPR001046 (TIGRFAM); IPR001046 (PFAM); IPR001046 (PANTHER); PTHR11706:SF62 (PANTHER); TMhelix (TMHMM); TMhelix (TMHMM); TMhelix (TMHMM); TMhelix (TMHMM); TMhelix (TMHMM); TMhelix (TMHMM); TMhelix (TMHMM); TMhelix (TMHMM); TMhelix (TMHMM); TMhelix (TMHMM); TMhelix (TMHMM)	C:GO:0016020; P:GO:0006810; F:GO:0005215	C:membrane; P:transport; F:transporter activity
[INTERPRO, BLASTED, MAPPED, ANNOTATED]	gene_ID_unitig9_25	A0A1L0DLA4_9ASCOCIC11C00000005325 OS=	1301	20	0	74.2	15	F:GO:0008094; F:GO:0008270; C:GO:0035861; P:GO:0000209; P:GO:0006289; P:GO:0042276; F:GO:0000403; F:GO:0009378; F:GO:0000400; P:GO:0006302; C:GO:0000781; F:GO:0005524; C:GO:0000790; P:GO:0032508; P:GO:0010994	F:DNA-dependent ATPase activity; F:zinc ion binding; C:site of double-strand break; P:protein polyubiquitination; P:nucleotide-excision repair; P:error-prone translesion synthesis; F:Y-form DNA binding; F:four-way junction helicase activity; F:four-way junction DNA binding; P:double-strand break repair; C:chromosome, telomeric region; F:ATP binding; C:nuclear chromatin; P:DNA duplex unwinding; P:…	EC:3.6.1.3; EC:3.6.1.15	Adenosinetriphosphatase; Nucleoside-triphosphate phosphatase	IPR001650 (SMART); IPR001841 (SMART); IPR014001 (SMART); IPR014905 (SMART); IPR001650 (PFAM); IPR014905 (PFAM); G3DSA:3.40.50.10810 (GENE3D); IPR001841 (PFAM); IPR000330 (PFAM); IPR013083 (G3DSA:3.30.40.GENE3D); G3DSA:3.40.50.300 (GENE3D); mobidb-lite (MOBIDB_LITE); mobidb-lite (MOBIDB_LITE); mobidb-lite (MOBIDB_LITE); PTHR10799 (PANTHER); PTHR10799:SF895 (PANTHER); IPR017907 (PROSITE_PATTERNS); …	F:GO:0003676; F:GO:0005524; F:GO:0008270; F:GO:0016818
[INTERPRO, NO-BLAST]	gene_ID_unitig9_26	---NA---	156	G3DSA:2.60.200.20 (GENE3D); IPR000253 (PFAM); IPR000253 (PROSITE_PROFILES); cd00060 (CDD); IPR008984 (SUPERFAMILY)	F:GO:0005515	F:protein binding
[INTERPRO, BLASTED, MAPPED, ANNOTATED]	gene_ID_unitig9_27	A0A1A0HJI0_9ASCOHistone acetyltransferase OS=Metschnikowia bicuspidata bicuspidata NRRL YB-4993 GN=METBIDRAFT_77011 PE=3 SV=1	337	20	9.80875e-156	66.35	5	P:GO:0043967; F:GO:0016407; C:GO:0031981; P:GO:0006355; C:GO:0044427	P:histone H4 acetylation; F:acetyltransferase activity; C:nuclear lumen; P:regulation of transcription, DNA-templated; C:chromosomal part	G3DSA:3.40.630.30 (GENE3D); G3DSA:3.30.60.60 (GENE3D); IPR002717 (PFAM); PTHR10615 (PANTHER); PTHR10615:SF137 (PANTHER); IPR002717 (PROSITE_PROFILES); IPR016181 (SUPERFAMILY)	F:GO:0016747; P:GO:0006355	F:transferase activity, transferring acyl groups other than amino-acyl groups; P:regulation of transcription, DNA-templated
[INTERPRO, BLASTED, MAPPED, ANNOTATED]	gene_ID_unitig9_28	A0A1A0HJ21_9ASCOSynaptobrevin-domain-containing OS=Metschnikowia bicuspidata bicuspidata NRRL YB-4993 GN=METBIDRAFT_77009 PE=3 SV=1	283	20	1.31052e-144	72.6	6	P:GO:0006906; C:GO:0000329; C:GO:0016021; F:GO:0005484; C:GO:0031201; P:GO:0042144	P:vesicle fusion; C:fungal-type vacuole membrane; C:integral component of membrane; F:SNAP receptor activity; C:SNARE complex; P:vacuole fusion, non-autophagic	IPR001388 (PRINTS); G3DSA:1.20.5.110 (GENE3D); IPR001388 (PFAM); G3DSA:3.30.450.50 (GENE3D); PTHR21136:SF146 (PANTHER); PTHR21136 (PANTHER); IPR001388 (PROSITE_PROFILES); cd15843 (CDD); SSF58038 (SUPERFAMILY); TMhelix (TMHMM)	P:GO:0016192; C:GO:0016021	P:vesicle-mediated transport; C:integral component of membrane
[INTERPRO, BLASTED, MAPPED, ANNOTATED]	gene_ID_unitig9_29	A0A1A0HJG5_9ASCOHistone-fold-containing (Fragment) OS=Metschnikowia bicuspidata bicuspidata NRRL YB-4993 GN=METBIDRAFT_17485 PE=4 SV=1	238	20	2.13108e-65	67.05	15	P:GO:0006273; P:GO:0090399; F:GO:0031492; P:GO:0006272; F:GO:0003690; P:GO:0042276; P:GO:0006348; C:GO:0008623; C:GO:0008622; P:GO:0042766; C:GO:0000781; F:GO:0003887; F:GO:0046982; P:GO:0043044; P:GO:0070868	P:lagging strand elongation; P:replicative senescence; F:nucleosomal DNA binding; P:leading strand elongation; F:double-stranded DNA binding; P:error-prone translesion synthesis; P:chromatin silencing at telomere; C:CHRAC; C:epsilon DNA polymerase complex; P:nucleosome mobilization; C:chromosome, telomeric region; F:DNA-directed DNA polymerase activity; F:protein heterodimerization activity; P:AT…	EC:2.7.7.7	DNA-directed DNA polymerase	IPR003958 (PFAM); G3DSA:1.10.20.10 (GENE3D); mobidb-lite (MOBIDB_LITE); PTHR11064:SF60 (PANTHER); PTHR11064 (PANTHER); IPR009072 (SUPERFAMILY)	F:GO:0046982
[INTERPRO, NO-BLAST]	gene_ID_unitig9_30	---NA---	269	Coil (COILS); mobidb-lite (MOBIDB_LITE)	no GO terms	no GO terms
[INTERPRO, BLASTED, MAPPED, ANNOTATED]	gene_ID_unitig9_31	A0A1A0HK19_9ASCOp-loop containing nucleoside triphosphate hydrolase OS=Metschnikowia bicuspidata bicuspidata NRRL YB-4993 GN=METBIDRAFT_30485 PE=4 SV=1	1316	20	0	75.05	9	F:GO:0003676; C:GO:0032040; F:GO:0005524; P:GO:0000462; F:GO:0003724; C:GO:0005739; F:GO:0008026; C:GO:0005730; C:GO:0030686	F:nucleic acid binding; C:small-subunit processome; F:ATP binding; P:maturation of SSU-rRNA from tricistronic rRNA transcript (SSU-rRNA, 5.8S rRNA, LSU-rRNA); F:RNA helicase activity; C:mitochondrion; F:ATP-dependent helicase activity; C:nucleolus; C:90S preribosome	EC:3.6.1.3; EC:3.6.1.15	Adenosinetriphosphatase; Nucleoside-triphosphate phosphatase	Coil (COILS); Coil (COILS); IPR007502 (SMART); IPR001650 (SMART); IPR014001 (SMART); G3DSA:3.40.50.300 (GENE3D); IPR011709 (PFAM); IPR001650 (PFAM); IPR011545 (PFAM); G3DSA:3.40.50.300 (GENE3D); IPR007502 (PFAM); mobidb-lite (MOBIDB_LITE); mobidb-lite (MOBIDB_LITE); mobidb-lite (MOBIDB_LITE); mobidb-lite (MOBIDB_LITE); PTHR18934:SF157 (PANTHER); PTHR18934 (PANTHER); IPR002464 (PROSITE_PATTERNS); …	F:GO:0003676; F:GO:0005524; F:GO:0004386
[INTERPRO, BLASTED, MAPPED, ANNOTATED]	gene_ID_unitig9_32	A0A1L0BCZ2_9ASCOCIC11C00000000020 OS=	1288	20	0	61.1	2	C:GO:0005634; F:GO:0016787	C:nucleus; F:hydrolase activity	IPR013783 (G3DSA:2.60.40.GENE3D); PTHR28206 (PANTHER); PTHR28206:SF2 (PANTHER); TMhelix (TMHMM)	no GO terms	no GO terms
[INTERPRO, BLASTED, MAPPED, ANNOTATED]	gene_ID_unitig9_33	A0A1A0HJH6_9ASCOTranscriptional coactivator pterin dehydratase (Fragment) OS=Metschnikowia bicuspidata bicuspidata NRRL YB-4993 GN=METBIDRAFT_18592 PE=4 SV=1	155	20	4.50901e-53	61.45	3	P:GO:0036180; P:GO:0036170; P:GO:0009267	P:filamentous growth of a population of unicellular organisms in response to biotic stimulus; P:filamentous growth of a population of unicellular organisms in response to starvation; P:cellular response to starvation	IPR001533 (G3DSA:3.30.1360.GENE3D); IPR001533 (PFAM); PTHR12599 (PANTHER); PTHR12599:SF12 (PANTHER); cd00488 (CDD); IPR001533 (SUPERFAMILY)	P:GO:0006729; F:GO:0008124	P:tetrahydrobiopterin biosynthetic process; F:4-alpha-hydroxytetrahydrobiopterin dehydratase activity
[INTERPRO, BLASTED]	gene_ID_unitig9_34	A0A1A0HGS0_9ASCOUncharacterized protein OS=Metschnikowia bicuspidata var. bicuspidata NRRL YB-4993 GN=METBIDRAFT_29616 PE=4 SV=1	262	1	6.03992e-14	44	no IPS match	no IPS match	no IPS match
[INTERPRO, BLASTED, MAPPED, ANNOTATED]	gene_ID_unitig9_35	A0A1A0HK14_9ASCOClathrin mu subunit OS=Metschnikowia bicuspidata bicuspidata NRRL YB-4993 GN=METBIDRAFT_37345 PE=3 SV=1	589	20	0	59.9	1	P:GO:0006810	P:transport	IPR028565 (PFAM); G3DSA:2.60.40.1170 (GENE3D); G3DSA:3.30.450.60 (GENE3D); mobidb-lite (MOBIDB_LITE); PTHR10529 (PANTHER); PTHR10529:SF334 (PANTHER); IPR018240 (PROSITE_PATTERNS); IPR028565 (PROSITE_PROFILES); IPR011012 (SUPERFAMILY); IPR028565 (SUPERFAMILY)	P:GO:0016192; C:GO:0030131; P:GO:0006886; P:GO:0006810	P:vesicle-mediated transport; C:clathrin adaptor complex; P:intracellular protein transport; P:transport
[INTERPRO, BLASTED, MAPPED]	gene_ID_unitig9_36	A0A1L0D0M2_9ASCOCIC11C00000000772 OS=	967	20	0	60.7	5	C:GO:0005634; F:GO:0008270; P:GO:0006355; F:GO:0000981; P:GO:0006357	C:nucleus; F:zinc ion binding; P:regulation of transcription, DNA-templated; F:RNA polymerase II transcription factor activity, sequence-specific DNA binding; P:regulation of transcription from RNA polymerase II promoter	IPR001138 (SMART); IPR021858 (PFAM); IPR001138 (PFAM); IPR001138 (G3DSA:4.10.240.GENE3D); mobidb-lite (MOBIDB_LITE); mobidb-lite (MOBIDB_LITE); mobidb-lite (MOBIDB_LITE); mobidb-lite (MOBIDB_LITE); PTHR31263:SF34 (PANTHER); PTHR31263 (PANTHER); IPR001138 (PROSITE_PATTERNS); IPR001138 (PROSITE_PROFILES); IPR001138 (CDD); IPR001138 (SUPERFAMILY)	C:GO:0005634; F:GO:0008270; P:GO:0006355; F:GO:0000981	C:nucleus; F:zinc ion binding; P:regulation of transcription, DNA-templated; F:RNA polymerase II transcription factor activity, sequence-specific DNA binding
[INTERPRO, BLASTED, MAPPED, ANNOTATED]	gene_ID_unitig9_37	A0A1L0DB30_9ASCOCIC11C00000004812 OS=	318	20	3.46259e-151	64.75	1	C:GO:0044424	C:intracellular part	IPR023214 (PFAM); IPR023214 (G3DSA:3.40.50.GENE3D); PTHR12725 (PANTHER); PTHR12725:SF97 (PANTHER); cd01427 (CDD); IPR023214 (SUPERFAMILY)	no GO terms	no GO terms
[INTERPRO, BLASTED, MAPPED, ANNOTATED]	gene_ID_unitig9_38	A0A1L0BQ19_9ASCOCIC11C00000002610 OS=	579	20	0	68.2	7	F:GO:0097159; F:GO:1901363; F:GO:0016491; C:GO:0005739; C:GO:0016020; F:GO:0043167; P:GO:0044710	F:organic cyclic compound binding; F:heterocyclic compound binding; F:oxidoreductase activity; C:mitochondrion; C:membrane; F:ion binding; P:single-organism metabolic process	IPR001199 (SMART); IPR013785 (G3DSA:3.20.20.GENE3D); IPR001199 (PFAM); IPR000262 (PFAM); IPR001199 (G3DSA:3.10.120.GENE3D); mobidb-lite (MOBIDB_LITE); PTHR10578:SF85 (PANTHER); PTHR10578 (PANTHER); IPR018506 (PROSITE_PATTERNS); IPR008259 (PROSITE_PATTERNS); IPR012133 (PROSITE_PROFILES); IPR001199 (PROSITE_PROFILES); cd02922 (CDD); SSF51395 (SUPERFAMILY); IPR001199 (SUPERFAMILY)	F:GO:0010181; F:GO:0003824; F:GO:0016491; P:GO:0055114; F:GO:0020037	F:FMN binding; F:catalytic activity; F:oxidoreductase activity; P:oxidation-reduction process; F:heme binding
[INTERPRO, BLASTED]	gene_ID_unitig9_39	W6Q1X6_PENRFGenomic 164S02 OS=Penicillium roqueforti (strain FM164) GN=PROQFM164_S02g000429 PE=4 SV=1	267	20	6.333e-21	44.95	no IPS match	no IPS match	no IPS match
[INTERPRO, BLASTED, MAPPED, ANNOTATED]	gene_ID_unitig9_40	A0A1A0HJ10_9ASCOMannan endo-1,6-alpha-mannosidase OS=Metschnikowia bicuspidata bicuspidata NRRL YB-4993 GN=METBIDRAFT_34643 PE=3 SV=1	451	20	0	75.35	11	P:GO:0031505; P:GO:0009272; C:GO:0009277; F:GO:0008496; P:GO:0035690; P:GO:0016052; C:GO:0016021; P:GO:0007124; P:GO:0036180; P:GO:0007117; C:GO:0046658	P:fungal-type cell wall organization; P:fungal-type cell wall bio_	genesis; C:fungal-type cell wall; F:mannan endo-1,6-alpha-mannosidase activity; P:cellular response to drug; P:carbohydrate catabolic process; C:integral component of membrane; P:pseudohyphal growth; P:filamentous growth of a population of unicellular organisms in response to biotic stimulus; P:budding cell bud growth; C:anchored component of plasma membrane	EC:3.2.1.101; EC:3.2.1.24	Mannan endo-1,6-alpha-mannosidase; Alpha-mannosidase	IPR014480 (PIRSF); IPR005198 (PFAM); G3DSA:1.50.10.20 (GENE3D); mobidb-lite (MOBIDB_LITE); PTHR12145:SF31 (PANTHER); IPR005198 (PANTHER); IPR008928 (SUPERFAMILY)
[INTERPRO, BLASTED, MAPPED, ANNOTATED]	gene_ID_unitig9_41	A0A1A0HJS3_9ASCOPhospho-2-dehydro-3-deoxyheptonate aldolase OS=Metschnikowia bicuspidata bicuspidata NRRL YB-4993 GN=METBIDRAFT_118455 PE=3 SV=1	373	20	0	89.5	5	C:GO:0005634; P:GO:0009073; C:GO:0005739; F:GO:0003849; P:GO:0009423	C:nucleus; P:aromatic amino acid family biosynthetic process; C:mitochondrion; F:3-deoxy-7-phosphoheptulonate synthase activity; P:chorismate biosynthetic process	EC:2.5.1.54	3-deoxy-7-phosphoheptulonate synthase	IPR006218 (PFAM); IPR006219 (TIGRFAM); IPR013785 (G3DSA:3.20.20.GENE3D); IPR006219 (PIRSF); PTHR21225:SF16 (PANTHER); IPR006219 (PANTHER); SSF51569 (SUPERFAMILY)	P:GO:0009073; F:GO:0003824; F:GO:0003849; P:GO:0009058
[INTERPRO, BLASTED, MAPPED, ANNOTATED]	gene_ID_unitig9_42	A0A1L0BGV4_9ASCOCIC11C00000003864 OS=	602	20	0	78.05	4	P:GO:0006855; F:GO:0015297; C:GO:0016021; F:GO:0015238	P:drug transmembrane transport; F:antiporter activity; C:integral component of membrane; F:drug transmembrane transporter activity	IPR002528 (PFAM); IPR002528 (TIGRFAM); mobidb-lite (MOBIDB_LITE); PTHR11206:SF200 (PANTHER); PTHR11206 (PANTHER); cd13132 (CDD); TMhelix (TMHMM); TMhelix (TMHMM); TMhelix (TMHMM); TMhelix (TMHMM); TMhelix (TMHMM); TMhelix (TMHMM); TMhelix (TMHMM); TMhelix (TMHMM); TMhelix (TMHMM); TMhelix (TMHMM); TMhelix (TMHMM)	P:GO:0006855; P:GO:0055085; F:GO:0015297; C:GO:0016020; F:GO:0015238	P:drug transmembrane transport; P:transmembrane transport; F:antiporter activity; C:membrane; F:drug transmembrane transporter activity
[INTERPRO, BLASTED, MAPPED, ANNOTATED]	gene_ID_unitig9_43	A0A1A0HJG6_9ASCOUbiquitinyl hydrolase 1 OS=Metschnikowia bicuspidata bicuspidata NRRL YB-4993 GN=METBIDRAFT_10308 PE=3 SV=1	789	20	0	71.65	3	F:GO:0046872; F:GO:0036459; P:GO:0006511	F:metal ion binding; F:thiol-dependent ubiquitinyl hydrolase activity; P:ubiquitin-dependent protein catabolic process	EC:3.4.19.12	Ubiquitinyl hydrolase 1	Coil (COILS); IPR001607 (SMART); IPR015940 (SMART); IPR001607 (PFAM); IPR015940 (PFAM); IPR001394 (PFAM); IPR013083 (G3DSA:3.30.40.GENE3D); IPR016652 (PIRSF); G3DSA:3.90.70.10 (GENE3D); IPR013083 (G3DSA:3.30.40.GENE3D); PTHR24006 (PANTHER); PTHR24006:SF530 (PANTHER); IPR018200 (PROSITE_PATTERNS); IPR018200 (PROSITE_PATTERNS); IPR028889 (PROSITE_PROFILES); IPR001607 (PROSITE_PROFILES); IPR015940 (…	P:GO:0016579; F:GO:0004843; F:GO:0008270; F:GO:0005515; F:GO:0036459; P:GO:0006511
[INTERPRO, BLASTED, MAPPED, ANNOTATED]	gene_ID_unitig9_44	A0A1A0HJF0_9ASCOGlycoside hydrolase OS=Metschnikowia bicuspidata bicuspidata NRRL YB-4993 GN=METBIDRAFT_76995 PE=3 SV=1	363	20	8.52392e-152	63.4	2	P:GO:0071704; F:GO:0016798	P:organic substance metabolic process; F:hydrolase activity, acting on glycosyl bonds	IPR011583 (SMART); G3DSA:3.20.20.80 (GENE3D); IPR001223 (PFAM); PTHR11177 (PANTHER); PTHR11177:SF248 (PANTHER); IPR001579 (PROSITE_PATTERNS); cd06548 (CDD); IPR017853 (SUPERFAMILY)	P:GO:0005975; F:GO:0008061; F:GO:0004553	P:carbohydrate metabolic process; F:chitin binding; F:hydrolase activity, hydrolyzing O-glycosyl compounds
[INTERPRO, BLASTED, MAPPED, ANNOTATED]	gene_ID_unitig9_45	A0A1A0HJ05_9ASCOVacuolar sorting-associated 74 OS=Metschnikowia bicuspidata bicuspidata NRRL YB-4993 GN=METBIDRAFT_34289 PE=4 SV=1	337	20	0	84.25	11	C:GO:0005634; F:GO:0070273; P:GO:0006890; P:GO:0030968; P:GO:0034067; C:GO:0016021; C:GO:0005829; C:GO:0019898; C:GO:0005797; F:GO:0019899; P:GO:0060304	C:nucleus; F:phosphatidylinositol-4-phosphate binding; P:retrograde vesicle-mediated transport, Golgi to ER; P:endoplasmic reticulum unfolded protein response; P:protein localization to Golgi apparatus; C:integral component of membrane; C:cytosol; C:extrinsic component of membrane; C:Golgi medial cisterna; F:enzyme binding; P:regulation of phosphatidylinositol dephosphorylation	IPR008628 (PFAM); G3DSA:1.10.3630.10 (GENE3D); mobidb-lite (MOBIDB_LITE); IPR008628 (PANTHER); PTHR12704:SF7 (PANTHER)	F:GO:0070273	F:phosphatidylinositol-4-phosphate binding
[INTERPRO, BLASTED, MAPPED, ANNOTATED]	gene_ID_unitig9_46	A0A1L0BPF4_9ASCOCIC11C00000000521 OS=	2340	20	0	59.8	9	C:GO:0043231; C:GO:0098588; F:GO:0043167; C:GO:0044444; C:GO:0044446; F:GO:0016301; P:GO:0044699; C:GO:0098805; P:GO:0006796	C:intracellular membrane-bounded organelle; C:bounding membrane of organelle; F:ion binding; C:cytoplasmic part; C:intracellular organelle part; F:kinase activity; P:single-organism process; C:whole membrane; P:phosphate-containing compound metabolic process	Coil (COILS); IPR000306 (SMART); IPR002498 (SMART); IPR002498 (PFAM); IPR027483 (G3DSA:3.30.810.GENE3D); IPR013083 (G3DSA:3.30.40.GENE3D); G3DSA:3.30.260.10 (GENE3D); IPR000306 (PFAM); IPR002423 (PFAM); IPR027484 (G3DSA:3.30.800.GENE3D); IPR027409 (G3DSA:3.50.7.GENE3D); mobidb-lite (MOBIDB_LITE); mobidb-lite (MOBIDB_LITE); mobidb-lite (MOBIDB_LITE); mobidb-lite (MOBIDB_LITE); mobidb-lite (MOBIDB_…	F:GO:0005524; F:GO:0016307; F:GO:0046872; P:GO:0046488	F:ATP binding; F:phosphatidylinositol phosphate kinase activity; F:metal ion binding; P:phosphatidylinositol metabolic process
[INTERPRO, BLASTED, MAPPED, ANNOTATED]	gene_ID_unitig9_47	A0A1A0HJR8_9ASCOPali-domain-containing OS=Metschnikowia bicuspidata bicuspidata NRRL YB-4993 GN=METBIDRAFT_76992 PE=4 SV=1	527	20	0	48.7	1	C:GO:0044464	C:cell part	IPR009571 (PFAM); G3DSA:1.10.3720.10 (GENE3D); mobidb-lite (MOBIDB_LITE); mobidb-lite (MOBIDB_LITE); mobidb-lite (MOBIDB_LITE); PTHR28013 (PANTHER); IPR000515 (SUPERFAMILY); TMhelix (TMHMM); TMhelix (TMHMM); TMhelix (TMHMM); TMhelix (TMHMM)	C:GO:0016020; P:GO:0006810; C:GO:0005886	C:membrane; P:transport; C:plasma membrane
[INTERPRO, BLASTED, MAPPED, ANNOTATED]	gene_ID_unitig9_48	A0A1A0HJG1_9ASCOt-SNARE OS=Metschnikowia bicuspidata bicuspidata NRRL YB-4993 GN=METBIDRAFT_34929 PE=3 SV=1	494	20	1.0122e-163	73.55	11	C:GO:0005802; P:GO:0032527; P:GO:0006906; F:GO:0005484; C:GO:0031201; C:GO:0031303; P:GO:0006897; P:GO:0009306; P:GO:0006675; P:GO:0032258; P:GO:0006896	C:trans-Golgi network; P:protein exit from endoplasmic reticulum; P:vesicle fusion; F:SNAP receptor activity; C:SNARE complex; C:integral component of endosome membrane; P:endocytosis; P:protein secretion; P:mannosyl-inositol phosphorylceramide metabolic process; P:CVT pathway; P:Golgi to vacuole transport	IPR000727 (SMART); IPR000727 (PFAM); G3DSA:1.20.58.70 (GENE3D); IPR007667 (PFAM); G3DSA:1.20.5.110 (GENE3D); mobidb-lite (MOBIDB_LITE); PTHR19957 (PANTHER); PTHR19957:SF184 (PANTHER); IPR006012 (PROSITE_PATTERNS); IPR007667 (PROSITE_PROFILES); IPR000727 (PROSITE_PROFILES); cd15845 (CDD); IPR010989 (SUPERFAMILY); TMhelix (TMHMM); TMhelix (TMHMM); TMhelix (TMHMM)	P:GO:0016192; C:GO:0016020; F:GO:0005484; P:GO:0006886	P:vesicle-mediated transport; C:membrane; F:SNAP receptor activity; P:intracellular protein transport
[INTERPRO, BLASTED, MAPPED, ANNOTATED]	gene_ID_unitig9_49	A0A1A0HJR3_9ASCOWD40 repeat OS=Metschnikowia bicuspidata bicuspidata NRRL YB-4993 GN=METBIDRAFT_36187 PE=4 SV=1	548	20	0	79.15	4	F:GO:0097027; P:GO:0007096; P:GO:0050790; F:GO:0010997	F:ubiquitin-protein transferase activator activity; P:regulation of exit from mitosis; P:regulation of catalytic activity; F:anaphase-promoting complex binding	IPR001680 (SMART); IPR015943 (G3DSA:2.130.10.GENE3D); IPR001680 (PFAM); IPR024977 (PFAM); mobidb-lite (MOBIDB_LITE); mobidb-lite (MOBIDB_LITE); mobidb-lite (MOBIDB_LITE); IPR033010 (PANTHER); IPR019775 (PROSITE_PATTERNS); IPR019775 (PROSITE_PATTERNS); IPR019775 (PROSITE_PATTERNS); IPR017986 (PROSITE_PROFILES); IPR001680 (PROSITE_PROFILES); IPR001680 (PROSITE_PROFILES); IPR001680 (PROSITE_PROFILES…	F:GO:0005515; F:GO:0097027; P:GO:1904668; F:GO:0010997	F:protein binding; F:ubiquitin-protein transferase activator activity; P:positive regulation of ubiquitin protein ligase activity; F:anaphase-promoting complex binding
[INTERPRO, BLASTED, MAPPED, ANNOTATED]	gene_ID_unitig9_50	A0A1A0HJE0_9ASCOAromatic amino acid aminotransferase OS=Metschnikowia bicuspidata bicuspidata NRRL YB-4993 GN=METBIDRAFT_118266 PE=4 SV=1	491	20	0	81.4	7	F:GO:0009042; F:GO:0030170; P:GO:0009072; F:GO:0008793; C:GO:0016021; F:GO:0047536; P:GO:0009058	F:valine-pyruvate transaminase activity; F:pyridoxal phosphate binding; P:aromatic amino acid family metabolic process; F:aromatic-amino-acid:2-oxoglutarate aminotransferase activity; C:integral component of membrane; F:2-aminoadipate transaminase activity; P:biosynthetic process	EC:2.6.1.66; EC:2.6.1.57; EC:2.6.1.39	Valine--pyruvate transaminase; Aromatic-amino-acid transaminase; 2-aminoadipate transaminase	IPR015422 (G3DSA:3.90.1150.GENE3D); IPR015421 (G3DSA:3.40.640.GENE3D); IPR004839 (PFAM); PTHR42790:SF6 (PANTHER); PTHR42790 (PANTHER); cd00609 (CDD); IPR015424 (SUPERFAMILY)	F:GO:0030170; F:GO:0003824; P:GO:0009058
[INTERPRO, BLASTED, MAPPED, ANNOTATED]	gene_ID_unitig9_51	A0A1A0HIZ4_9ASCO HIR OS=Metschnikowia bicuspidata bicuspidata NRRL YB-4993 GN=METBIDRAFT_65768 PE=3 SV=1	967	20	0	65.65	1	P:GO:0007059	P:chromosome segregation	IPR001680 (SMART); IPR001680 (PFAM); G3DSA:1.10.10.670 (GENE3D); IPR011494 (PFAM); G3DSA:2.40.50.140 (GENE3D); IPR015943 (G3DSA:2.130.10.GENE3D); IPR015943 (G3DSA:2.130.10.GENE3D); IPR019015 (PFAM); mobidb-lite (MOBIDB_LITE); mobidb-lite (MOBIDB_LITE); IPR031120 (PANTHER); IPR001680 (PROSITE_PROFILES); IPR001680 (PROSITE_PROFILES); IPR001680 (PROSITE_PROFILES); IPR017986 (PROSITE_PROFILES); cd002…	C:GO:0005634; F:GO:0005515; P:GO:0006351; P:GO:0006355; P:GO:0006325	C:nucleus; F:protein binding; P:transcription, DNA-templated; P:regulation of transcription, DNA-templated; P:chromatin organization
[INTERPRO, BLASTED, MAPPED, ANNOTATED]	gene_ID_unitig9_52	A0A1A0HJZ1_9ASCOGolgi to ER traffic 1 OS=Metschnikowia bicuspidata bicuspidata NRRL YB-4993 GN=GET1 PE=3 SV=1	210	20	1.90323e-110	66.45	5	C:GO:0044432; C:GO:0005794; P:GO:0045048; C:GO:0044425; P:GO:0006810	C:endoplasmic reticulum part; C:Golgi apparatus; P:protein insertion into ER membrane; C:membrane part; P:transport	IPR028945 (PFAM); PTHR11760 (PANTHER); PTHR11760:SF28 (PANTHER); IPR027538 (HAMAP); TMhelix (TMHMM); TMhelix (TMHMM); TMhelix (TMHMM)	C:GO:0043529; P:GO:0071816	C:GET complex; P:tail-anchored membrane protein insertion into ER membrane
[INTERPRO, BLASTED, MAPPED, ANNOTATED]	gene_ID_unitig9_53	A0A1A0HJQ8_9ASCOCasein kinase II subunit beta OS=Metschnikowia bicuspidata bicuspidata NRRL YB-4993 GN=METBIDRAFT_76985 PE=3 SV=1	266	20	1.92668e-164	84.4	10	C:GO:0005956; F:GO:0030291; P:GO:0035690; C:GO:0034456; P:GO:0006468; P:GO:0006974; P:GO:0071901; F:GO:0016301; P:GO:0006359; P:GO:0006356	C:protein kinase CK2 complex; F:protein serine/threonine kinase inhibitor activity; P:cellular response to drug; C:UTP-C complex; P:protein phosphorylation; P:cellular response to DNA damage stimulus; P:negative regulation of protein serine/threonine kinase activity; F:kinase activity; P:regulation of transcription from RNA polymerase III promoter; P:regulation of transcription from RNA polymeras…	IPR000704 (PRINTS); IPR000704 (SMART); IPR000704 (PFAM); G3DSA:2.20.25.20 (GENE3D); IPR016149 (G3DSA:1.10.1820.GENE3D); mobidb-lite (MOBIDB_LITE); IPR000704 (PANTHER); PTHR11740:SF11 (PANTHER); IPR000704 (PROSITE_PATTERNS); IPR000704 (SUPERFAMILY)	C:GO:0005956; F:GO:0019887	C:protein kinase CK2 complex; F:protein kinase regulator activity
[INTERPRO, BLASTED, MAPPED, ANNOTATED]	gene_ID_unitig9_54	A0A1L0BAJ3_9ASCOCIC11C00000001790 OS=	224	20	1.29713e-107	72.75	3	C:GO:0016020; P:GO:0022607; P:GO:0044237	C:membrane; P:cellular component assembly; P:cellular metabolic process	Coil (COILS); IPR009073 (G3DSA:1.20.1280.GENE3D); IPR001623 (G3DSA:1.10.287.GENE3D); IPR009073 (PFAM); IPR004640 (TIGRFAM); IPR004640 (PANTHER); PTHR14021:SF16 (PANTHER); IPR009073 (SUPERFAMILY); IPR001623 (SUPERFAMILY)	F:GO:0051087; P:GO:0097428; F:GO:0001671; P:GO:0051259	F:chaperone binding; P:protein maturation by iron-sulfur cluster transfer; F:ATPase activator activity; P:protein oligomerization
[INTERPRO, BLASTED, MAPPED, ANNOTATED]	gene_ID_unitig9_55	A0A1L0CXM5_9ASCOCIC11C00000002770 OS=	747	20	0	88	9	C:GO:0005789; F:GO:0008270; P:GO:0006888; F:GO:0005096; C:GO:0000139; P:GO:0006886; C:GO:0030127; P:GO:0043547; P:GO:0003400	C:endoplasmic reticulum membrane; F:zinc ion binding; P:ER to Golgi vesicle-mediated transport; F:GTPase activator activity; C:Golgi membrane; P:intracellular protein transport; C:COPII vesicle coat; P:positive regulation of GTPase activity; P:regulation of COPII vesicle coating	IPR012990 (PFAM); IPR006896 (PFAM); IPR029006 (G3DSA:3.40.20.GENE3D); IPR002035 (G3DSA:3.40.50.GENE3D); G3DSA:2.30.30.380 (GENE3D); G3DSA:2.60.40.1670 (GENE3D); IPR006900 (PFAM); IPR006895 (PFAM); IPR007123 (PFAM); PTHR11141:SF12 (PANTHER); PTHR11141 (PANTHER); cd11287 (CDD); IPR002035 (SUPERFAMILY); IPR006895 (SUPERFAMILY); IPR006900 (SUPERFAMILY); SSF81995 (SUPERFAMILY); IPR007123 (SUPERFAMILY)	P:GO:0006888; F:GO:0008270; P:GO:0006886; C:GO:0030127	P:ER to Golgi vesicle-mediated transport; F:zinc ion binding; P:intracellular protein transport; C:COPII vesicle coat
[INTERPRO, BLASTED, MAPPED, ANNOTATED]	gene_ID_unitig9_56	A0A1L0DJU4_9ASCOCIC11C00000005874 OS=	344	20	0	74.35	3	C:GO:0005634; P:GO:0006464; F:GO:0008641	C:nucleus; P:cellular protein modification process; F:small protein activating enzyme activity	G3DSA:3.40.50.720 (GENE3D); IPR000594 (PFAM); PTHR10953:SF174 (PANTHER); PTHR10953 (PANTHER); IPR000594 (SUPERFAMILY)	F:GO:0008641	F:small protein activating enzyme activity
[INTERPRO, BLASTED, MAPPED, ANNOTATED]	gene_ID_unitig9_57	A0A1L0D9M5_9ASCOCIC11C00000005519 OS=	641	20	0	63.5	3	P:GO:0016458; C:GO:0005634; F:GO:0005488	P:_	gene silencing; C:nucleus; F:binding	Coil (COILS); Coil (COILS); IPR026216 (PRINTS); IPR021006 (PFAM)	C:GO:0005634; P:GO:0016575; C:GO:0070823	C:nucleus; P:histone deacetylation; C:HDA1 complex
[INTERPRO, BLASTED, MAPPED]	gene_ID_unitig9_58	A0A1L0BR46_9ASCOCIC11C00000003003 OS=	470	20	4.72036e-172	62.3	1	F:GO:0003674	F:molecular_function	IPR020472 (PRINTS); IPR014906 (SMART); IPR001680 (SMART); IPR001680 (PFAM); G3DSA:2.80.10.50 (GENE3D); G3DSA:2.80.10.50 (GENE3D); G3DSA:2.40.50.140 (GENE3D); G3DSA:1.10.10.670 (GENE3D); PTHR19846 (PANTHER); PTHR19846:SF1 (PANTHER); IPR019775 (PROSITE_PATTERNS); IPR001680 (PROSITE_PROFILES); IPR001680 (PROSITE_PROFILES); IPR001680 (PROSITE_PROFILES); IPR001680 (PROSITE_PROFILES); IPR017986 (PROSIT…	F:GO:0005515	F:protein binding
[INTERPRO, BLASTED, MAPPED, ANNOTATED]	gene_ID_unitig9_59	A0A1E4RJN3_9ASCOClavaminate synthase OS=Hyphopichia burtonii NRRL Y-1933 GN=HYPBUDRAFT_107513 PE=4 SV=1	344	20	3.59723e-150	70.75	1	F:GO:0016491	F:oxidoreductase activity	IPR027443 (G3DSA:2.60.120.GENE3D); PTHR10209 (PANTHER); PTHR10209:SF243 (PANTHER); SSF51197 (SUPERFAMILY)	no GO terms	no GO terms
[INTERPRO, BLASTED, MAPPED]	gene_ID_unitig9_60	A0A1L0BBU9_9ASCOCIC11C00000001434 OS=	1044	20	0	47.55	9	P:GO:0007120; C:GO:0005935; F:GO:0046872; F:GO:0003824; P:GO:0006508; C:GO:0043332; P:GO:0007323; F:GO:0008233; F:GO:0004222	P:axial cellular bud site selection; C:cellular bud neck; F:metal ion binding; F:catalytic activity; P:proteolysis; C:mating projection tip; P:peptide pheromone maturation; F:peptidase activity; F:metalloendopeptidase activity	G3DSA:3.30.830.10 (GENE3D); IPR007863 (PFAM); G3DSA:3.30.830.10 (GENE3D); G3DSA:3.30.830.10 (GENE3D); IPR011765 (PFAM); G3DSA:3.30.830.10 (GENE3D); PTHR43690:SF4 (PANTHER); PTHR43690 (PANTHER); IPR011249 (SUPERFAMILY); IPR011249 (SUPERFAMILY); IPR011249 (SUPERFAMILY); IPR011249 (SUPERFAMILY)	F:GO:0046872; F:GO:0003824	F:metal ion binding; F:catalytic activity
[INTERPRO, BLASTED, MAPPED]	gene_ID_unitig9_61	A0A1L0BDX5_9ASCOCIC11C00000002255 OS=	151	20	1.93147e-64	63.55	5	P:GO:0008150; F:GO:0016757; F:GO:0016740; C:GO:0005575; F:GO:0003674	P:biological_process; F:transferase activity, transferring glycosyl groups; F:transferase activity; C:cellular_component; F:molecular_function	mobidb-lite (MOBIDB_LITE); mobidb-lite (MOBIDB_LITE)	no GO terms	no GO terms
[INTERPRO, BLASTED, MAPPED, ANNOTATED]	gene_ID_unitig9_62	A0A1B7SL08_9ASCOAmine oxidase OS=Ogataea polymorpha GN=OGAPODRAFT_92472 PE=3 SV=1	1313	20	0	84.8	6	P:GO:0009308; F:GO:0005507; F:GO:0048038; P:GO:0035690; F:GO:0008131; P:GO:0055114	P:amine metabolic process; F:copper ion binding; F:quinone binding; P:cellular response to drug; F:primary amine oxidase activity; P:oxidation-reduction process	EC:1.4.3.21	Primary-amine oxidase	IPR000269 (PRINTS); IPR015798 (PFAM); G3DSA:3.10.450.40 (GENE3D); G3DSA:3.10.450.40 (GENE3D); IPR015798 (G3DSA:2.70.98.GENE3D); IPR000269 (PANTHER); PTHR10638:SF45 (PANTHER); IPR000269 (PROSITE_PATTERNS); IPR000269 (PROSITE_PATTERNS); IPR016182 (SUPERFAMILY); IPR016182 (SUPERFAMILY); IPR015798 (SUPERFAMILY); IPR015798 (SUPERFAMILY); IPR016182 (SUPERFAMILY); IPR016182 (SUPERFAMILY)	P:GO:0009308; F:GO:0005507; F:GO:0048038; F:GO:0008131; P:GO:0055114
[INTERPRO, BLASTED, MAPPED]	gene_ID_unitig9_63	A0A1L0CXL9_9ASCOCIC11C00000000551 OS=	225	20	1.28525e-67	63.95	3	P:GO:0008150; C:GO:0005575; F:GO:0003674	P:biological_process; C:cellular_component; F:molecular_function	mobidb-lite (MOBIDB_LITE)	no GO terms	no GO terms
[INTERPRO, BLASTED, MAPPED, ANNOTATED]	gene_ID_unitig9_64	A0A1A0HJB8_9ASCONADP(+)-dependent dehydrogenase OS=Metschnikowia bicuspidata bicuspidata NRRL YB-4993 GN=METBIDRAFT_117972 PE=3 SV=1	894	20	4.16124e-169	83.05	7	F:GO:0004090; F:GO:0050255; C:GO:0005634; F:GO:0031132; P:GO:0055114; C:GO:0005840; F:GO:0016620	F:carbonyl reductase (NADPH) activity; F:ribitol 2-dehydrogenase activity; C:nucleus; F:serine 3-dehydrogenase activity; P:oxidation-reduction process; C:ribosome; F:oxidoreductase activity, acting on the aldehyde or oxo group of donors, NAD or NADP as acceptor	EC:1.1.1.56; EC:1.1.1.276; EC:1.1.1.184	Ribitol 2-dehydrogenase; Serine 3-dehydrogenase (NADP(+)); Carbonyl reductase (NADPH)	IPR002347 (PRINTS); IPR002347 (PRINTS); G3DSA:3.40.50.720 (GENE3D); IPR002347 (PFAM); IPR005036 (PFAM); IPR013783 (G3DSA:2.60.40.GENE3D); G3DSA:3.40.50.720 (GENE3D); mobidb-lite (MOBIDB_LITE); mobidb-lite (MOBIDB_LITE); mobidb-lite (MOBIDB_LITE); PTHR42901:SF1 (PANTHER); PTHR42901 (PANTHER); IPR020904 (PROSITE_PATTERNS); IPR005036 (PROSITE_PROFILES); cd05346 (CDD); IPR016040 (SUPERFAMILY)	F:GO:0005515; F:GO:0016491
[INTERPRO, BLASTED, MAPPED, ANNOTATED]	gene_ID_unitig9_65	A0A1A0HIX5_9ASCOCytoplasmic tRNA 2-thiolation 1 OS=Metschnikowia bicuspidata bicuspidata NRRL YB-4993 GN=NCS6 PE=3 SV=1	388	20	0	86.65	7	P:GO:0008360; F:GO:0016779; P:GO:0006450; F:GO:0000049; P:GO:0002143; P:GO:0032447; C:GO:0002144	P:regulation of cell shape; F:nucleotidyltransferase activity; P:regulation of translational fidelity; F:tRNA binding; P:tRNA wobble position uridine thiolation; P:protein urmylation; C:cytosolic tRNA wobble base thiouridylase complex	IPR011063 (PFAM); IPR035107 (PIRSF); IPR014729 (G3DSA:3.40.50.GENE3D); IPR032442 (PFAM); IPR000541 (PTHR11807:PANTHER); PTHR11807 (PANTHER); IPR020554 (PROSITE_PATTERNS); IPR000541 (HAMAP); cd01993 (CDD); SSF52402 (SUPERFAMILY)	P:GO:0008033; P:GO:0002098; F:GO:0000049; P:GO:0034227	P:tRNA processing; P:tRNA wobble uridine modification; F:tRNA binding; P:tRNA thio-modification
[INTERPRO, BLASTED, MAPPED, ANNOTATED]	gene_ID_unitig9_66	A0A1A0HJW9_9ASCOEukaryotic translation initiation factor 3 subunit C OS=Metschnikowia bicuspidata bicuspidata NRRL YB-4993 GN=NIP1 PE=3 SV=1	828	20	0	74.35	11	C:GO:0043614; F:GO:0003743; P:GO:0001731; C:GO:0010494; C:GO:0071541; C:GO:0016282; C:GO:0071540; C:GO:0005829; C:GO:0033290; F:GO:0031369; P:GO:0006446	C:multi-eIF complex; F:translation initiation factor activity; P:formation of translation preinitiation complex; C:cytoplasmic stress granule; C:eukaryotic translation initiation factor 3 complex, eIF3m; C:eukaryotic 43S preinitiation complex; C:eukaryotic translation initiation factor 3 complex, eIF3e; C:cytosol; C:eukaryotic 48S preinitiation complex; F:translation initiation factor binding; P:…	Coil (COILS); SM00753 (SMART); IPR000717 (SMART); IPR008905 (PFAM); IPR011991 (G3DSA:1.10.10.GENE3D); IPR000717 (PFAM); mobidb-lite (MOBIDB_LITE); mobidb-lite (MOBIDB_LITE); PTHR13937:SF4 (PANTHER); PTHR13937 (PANTHER); IPR027516 (HAMAP)	F:GO:0003743; F:GO:0005515; F:GO:0003723; P:GO:0006413; F:GO:0031369; C:GO:0005852	F:translation initiation factor activity; F:protein binding; F:RNA binding; P:translational initiation; F:translation initiation factor binding; C:eukaryotic translation initiation factor 3 complex
[INTERPRO, BLASTED, MAPPED, ANNOTATED]	gene_ID_unitig9_67	A0A1L0DB06_9ASCOCIC11C00000004628 OS=	420	20	0	67.3	1	C:GO:0005737	C:cytoplasm	G3DSA:1.20.1280.50 (GENE3D); PTHR12874 (PANTHER); PTHR12874:SF15 (PANTHER); IPR001810 (SUPERFAMILY)	F:GO:0005515	F:protein binding
[INTERPRO, BLASTED, MAPPED, ANNOTATED]	gene_ID_unitig9_68	C4Y892_CLAL4Glycylpeptide N-tetradecanoyltransferase OS=Clavispora lusitaniae (strain ATCC 42720) GN=CLUG_04420 PE=3 SV=1	439	20	0	82.75	6	F:GO:0008144; C:GO:0005829; P:GO:0001302; P:GO:0009405; F:GO:0004379; P:GO:0018008	F:drug binding; C:cytosol; P:replicative cell aging; P:patho_	genesis; F:glycylpeptide N-tetradecanoyltransferase activity; P:N-terminal peptidyl-glycine N-myristoylation	EC:2.3.1.97	Glycylpeptide N-tetradecanoyltransferase	IPR022677 (PFAM); G3DSA:3.40.630.30 (GENE3D); IPR022676 (PFAM); IPR000903 (PIRSF); G3DSA:3.40.630.30 (GENE3D); PTHR11377:SF11 (PANTHER); IPR000903 (PANTHER); IPR022678 (PROSITE_PATTERNS); IPR022678 (PROSITE_PATTERNS); IPR016181 (SUPERFAMILY); IPR016181 (SUPERFAMILY)
[INTERPRO, BLASTED, MAPPED]	gene_ID_unitig9_69	A0A1L0DCQ5_9ASCOCIC11C00000004378 OS=	368	20	8.65588e-146	56.2	3	P:GO:0008150; C:GO:0005575; F:GO:0003674	P:biological_process; C:cellular_component; F:molecular_function	Coil (COILS); mobidb-lite (MOBIDB_LITE); mobidb-lite (MOBIDB_LITE); mobidb-lite (MOBIDB_LITE)	no GO terms	no GO terms
[INTERPRO, BLASTED, MAPPED, ANNOTATED]	gene_ID_unitig9_70	A0A1A0HJC6_9ASCOPeriodic tryptophan 1 OS=Metschnikowia bicuspidata bicuspidata NRRL YB-4993 GN=METBIDRAFT_36827 PE=4 SV=1	560	20	0	80.65	2	C:GO:0005829; C:GO:0005730	C:cytosol; C:nucleolus	Coil (COILS); IPR001680 (SMART); IPR015943 (G3DSA:2.130.10.GENE3D); mobidb-lite (MOBIDB_LITE); mobidb-lite (MOBIDB_LITE); PTHR14091:SF5 (PANTHER); PTHR14091 (PANTHER); IPR019775 (PROSITE_PATTERNS); IPR017986 (PROSITE_PROFILES); IPR001680 (PROSITE_PROFILES); IPR017986 (SUPERFAMILY)	F:GO:0005515	F:protein binding
[INTERPRO, BLASTED, MAPPED, ANNOTATED]	gene_ID_unitig9_71	A0A1L0BRN4_9ASCOCIC11C00000001028 OS=	381	20	0	79.15	10	F:GO:0003779; F:GO:0005509; C:GO:0043332; P:GO:0007015; C:GO:0010008; P:GO:0006897; F:GO:0030674; P:GO:0030476; C:GO:0005886; C:GO:0030479	F:actin binding; F:calcium ion binding; C:mating projection tip; P:actin filament organization; C:endosome membrane; P:endocytosis; F:protein binding, bridging; P:ascospore wall assembly; C:plasma membrane; C:actin cortical patch	Coil (COILS); Coil (COILS); IPR002048 (SMART); IPR000261 (SMART); IPR000261 (PFAM); IPR025604 (PFAM); G3DSA:1.10.238.10 (GENE3D); G3DSA:1.10.238.10 (GENE3D); PTHR11216 (PANTHER); PTHR11216:SF86 (PANTHER); IPR018247 (PROSITE_PATTERNS); IPR002048 (PROSITE_PROFILES); IPR000261 (PROSITE_PROFILES); IPR000261 (PROSITE_PROFILES); cd00052 (CDD); IPR011992 (SUPERFAMILY); IPR011992 (SUPERFAMILY)	F:GO:0005515; F:GO:0005509; P:GO:0007015; P:GO:0006897	F:protein binding; F:calcium ion binding; P:actin filament organization; P:endocytosis
[INTERPRO, BLASTED, MAPPED, ANNOTATED]	gene_ID_unitig9_72	A0A1A0HIW7_9ASCOOr F420H2 dehydrogenase OS=Metschnikowia bicuspidata bicuspidata NRRL YB-4993 GN=METBIDRAFT_117845 PE=3 SV=1	284	20	2.42343e-180	85	4	F:GO:0008137; P:GO:0055114; C:GO:0005743; C:GO:0070469	F:NADH dehydrogenase (ubiquinone) activity; P:oxidation-reduction process; C:mitochondrial inner membrane; C:respiratory chain	EC:1.6.99.5; EC:1.6.99.3; EC:1.6.5.3	Acting on NADH or NADPH; NADH dehydrogenase; NADH:ubiquinone reductase (H(+)-translocating)	IPR001268 (PFAM); IPR010218 (TIGRFAM); mobidb-lite (MOBIDB_LITE); PTHR10884 (PANTHER); PTHR10884:SF13 (PANTHER); IPR020396 (PROSITE_PATTERNS); IPR001268 (PRODOM); IPR010218 (HAMAP); SSF143243 (SUPERFAMILY)	F:GO:0008137; P:GO:0055114; F:GO:0016651
[INTERPRO, BLASTED, MAPPED]	gene_ID_unitig9_73	A0A1L0BR77_9ASCOCIC11C00000003244 OS=	723	20	0	52.15	5	C:GO:0005634; F:GO:0008270; P:GO:0006355; F:GO:0000981; P:GO:0006357	C:nucleus; F:zinc ion binding; P:regulation of transcription, DNA-templated; F:RNA polymerase II transcription factor activity, sequence-specific DNA binding; P:regulation of transcription from RNA polymerase II promoter	IPR001138 (G3DSA:4.10.240.GENE3D); mobidb-lite (MOBIDB_LITE); mobidb-lite (MOBIDB_LITE); IPR001138 (PROSITE_PATTERNS); IPR001138 (CDD); IPR001138 (SUPERFAMILY)	C:GO:0005634; F:GO:0008270; P:GO:0006355; F:GO:0000981	C:nucleus; F:zinc ion binding; P:regulation of transcription, DNA-templated; F:RNA polymerase II transcription factor activity, sequence-specific DNA binding
[INTERPRO, BLASTED, MAPPED]	gene_ID_unitig9_74	A0A1L0DNE9_9ASCOCIC11C00000000572 OS=	677	20	6.62649e-175	52.8	12	F:GO:0004842; C:GO:0005634; F:GO:0061630; F:GO:0008270; F:GO:0003723; C:GO:0005737; P:GO:0071630; F:GO:0046872; P:GO:0000209; P:GO:0042787; F:GO:0016874; P:GO:0051788	F:ubiquitin-protein transferase activity; C:nucleus; F:ubiquitin protein ligase activity; F:zinc ion binding; F:RNA binding; C:cytoplasm; P:ubiquitin-dependent catabolism of misfolded proteins by nucleus-associated proteasome; F:metal ion binding; P:protein polyubiquitination; P:protein ubiquitination involved in ubiquitin-dependent protein catabolic process; F:ligase activity; P:response to misf…	IPR013083 (G3DSA:3.30.40.GENE3D); IPR001841 (PFAM); mobidb-lite (MOBIDB_LITE); mobidb-lite (MOBIDB_LITE); mobidb-lite (MOBIDB_LITE); mobidb-lite (MOBIDB_LITE); PTHR22763 (PANTHER); IPR001841 (PROSITE_PROFILES); IPR001841 (CDD); SSF57850 (SUPERFAMILY)	no GO terms	no GO terms
[INTERPRO, BLASTED, MAPPED, ANNOTATED]	gene_ID_unitig9_75	A0A1L0DAY2_9ASCOCIC11C00000002137 OS=	266	20	1.27837e-147	74.75	5	C:GO:0005634; F:GO:0008175; P:GO:0031591; C:GO:0005829; P:GO:0030488	C:nucleus; F:tRNA methyltransferase activity; P:wybutosine biosynthetic process; C:cytosol; P:tRNA methylation	Coil (COILS); IPR003827 (PFAM); IPR003827 (G3DSA:3.30.1960.GENE3D); mobidb-lite (MOBIDB_LITE); PTHR23245:SF42 (PANTHER); PTHR23245 (PANTHER); IPR003827 (SUPERFAMILY)	no GO terms	no GO terms
[INTERPRO, BLASTED, MAPPED, ANNOTATED]	gene_ID_unitig9_76	Q6BY65_DEBHADEHA2A12056p OS=Debaryomyces hansenii (strain ATCC 36239 CBS 767 JCM 1990 NBRC 0083 IGC 2968) GN=DEHA2A12056g PE=4 SV=2	1196	20	4.11643e-170	59.7	4	P:GO:0015031; C:GO:0044444; P:GO:0034613; P:GO:0048193	P:protein transport; C:cytoplasmic part; P:cellular protein localization; P:Golgi vesicle transport	Coil (COILS); Coil (COILS); Coil (COILS); Coil (COILS); Coil (COILS); Coil (COILS); Coil (COILS); Coil (COILS); Coil (COILS); Coil (COILS); Coil (COILS); Coil (COILS); Coil (COILS); Coil (COILS); Coil (COILS); Coil (COILS); IPR000237 (SMART); G3DSA:1.20.5.170 (GENE3D); G3DSA:1.20.5.50 (GENE3D); G3DSA:1.20.5.50 (GENE3D); IPR000237 (PFAM); G3DSA:1.20.5.340 (GENE3D); IPR000237 (G3DSA:1.10.220.GENE3D…	P:GO:0000042; F:GO:0005515	P:protein targeting to Golgi; F:protein binding
[INTERPRO, BLASTED, MAPPED, ANNOTATED]	gene_ID_unitig9_77	A0A1A0HJV2_9ASCOCell division control 25 OS=Metschnikowia bicuspidata bicuspidata NRRL YB-4993 GN=METBIDRAFT_117810 PE=4 SV=1	1316	20	0	69.55	11	P:GO:0071333; C:GO:0043231; C:GO:0016020; F:GO:0005088; P:GO:0036180; P:GO:0036170; P:GO:0007265; C:GO:0044444; P:GO:0009267; P:GO:0051726; P:GO:0019933	P:cellular response to glucose stimulus; C:intracellular membrane-bounded organelle; C:membrane; F:Ras guanyl-nucleotide exchange factor activity; P:filamentous growth of a population of unicellular organisms in response to biotic stimulus; P:filamentous growth of a population of unicellular organisms in response to starvation; P:Ras protein signal transduction; C:cytoplasmic part; P:cellular res…	IPR001452 (PRINTS); IPR001452 (SMART); IPR001895 (SMART); IPR000651 (SMART); G3DSA:2.30.30.40 (GENE3D); IPR001452 (PFAM); IPR001895 (PFAM); G3DSA:2.30.30.40 (GENE3D); IPR001895 (G3DSA:1.10.840.GENE3D); IPR000651 (PFAM); mobidb-lite (MOBIDB_LITE); mobidb-lite (MOBIDB_LITE); mobidb-lite (MOBIDB_LITE); PTHR23113:SF248 (PANTHER); PTHR23113 (PANTHER); IPR019804 (PROSITE_PATTERNS); IPR000651 (PROSITE_P…	F:GO:0005515; P:GO:0007264; F:GO:0005085	F:protein binding; P:small GTPase mediated signal transduction; F:guanyl-nucleotide exchange factor activity
[INTERPRO, BLASTED, MAPPED, ANNOTATED]	gene_ID_unitig9_78	A0A1A0HJ98_9ASCOVacuolar sorting-associated 26 OS=Metschnikowia bicuspidata bicuspidata NRRL YB-4993 GN=METBIDRAFT_38314 PE=4 SV=1	307	20	1.64176e-172	82.45	4	C:GO:0005634; C:GO:0005829; P:GO:0006886; P:GO:0042147	C:nucleus; C:cytosol; P:intracellular protein transport; P:retrograde transport, endosome to Golgi	IPR028934 (PFAM); IPR028934 (PANTHER); PTHR12233:SF9 (PANTHER)	no GO terms	no GO terms
[INTERPRO, BLASTED, MAPPED, ANNOTATED]	gene_ID_unitig9_79	A0A1A0HIV4_9ASCOMitochondrial carrier OS=Metschnikowia bicuspidata bicuspidata NRRL YB-4993 GN=METBIDRAFT_35385 PE=3 SV=1	391	20	0	81.5	2	C:GO:0016021; P:GO:0006810	C:integral component of membrane; P:transport	IPR023395 (G3DSA:1.50.40.GENE3D); IPR018108 (PFAM); PTHR24089:SF568 (PANTHER); PTHR24089 (PANTHER); IPR018108 (PROSITE_PROFILES); IPR023395 (SUPERFAMILY); TMhelix (TMHMM); TMhelix (TMHMM); TMhelix (TMHMM)	no GO terms	no GO terms
[INTERPRO, BLASTED, MAPPED, ANNOTATED]	gene_ID_unitig9_80	A0A1A0HJM2_9ASCOSec7-domain-containing OS=Metschnikowia bicuspidata bicuspidata NRRL YB-4993 GN=METBIDRAFT_76961 PE=4 SV=1	1721	20	0	69.1	1	P:GO:0065007	P:biological regulation	Coil (COILS); IPR001754 (SMART); IPR000904 (SMART); IPR001754 (PFAM); IPR011989 (G3DSA:1.25.10.GENE3D); G3DSA:1.10.220.20 (GENE3D); IPR000904 (PFAM); IPR013785 (G3DSA:3.20.20.GENE3D); IPR014732 (TIGRFAM); IPR032691 (PFAM); IPR023394 (G3DSA:1.10.1000.GENE3D); mobidb-lite (MOBIDB_LITE); PTHR10663 (PANTHER); PTHR10663:SF238 (PANTHER); IPR018089 (PROSITE_PATTERNS); IPR000904 (PROSITE_PROFILES); cd001…	P:GO:0006207; F:GO:0003824; F:GO:0005086; F:GO:0004590; P:GO:0008152; P:GO:0032012; P:GO:0044205; F:GO:0005488	P:'de novo' pyrimidine nucleobase biosynthetic process; F:catalytic activity; F:ARF guanyl-nucleotide exchange factor activity; F:orotidine-5'-phosphate decarboxylase activity; P:metabolic process; P:regulation of ARF protein signal transduction; P:'de novo' UMP biosynthetic process; F:binding
[INTERPRO, BLASTED, MAPPED]	gene_ID_unitig9_81	A0A1L0D5D9_9ASCOCIC11C00000003590 OS=	708	20	0	55.05	9	F:GO:0008270; P:GO:0061587; P:GO:0060195; F:GO:0046872; P:GO:0030174; C:GO:0000118; C:GO:0032221; P:GO:0016575; P:GO:0006368	F:zinc ion binding; P:transfer RNA _	gene-mediated silencing; P:negative regulation of antisense RNA transcription; F:metal ion binding; P:regulation of DNA-dependent DNA replication initiation; C:histone deacetylase complex; C:Rpd3S complex; P:histone deacetylation; P:transcription elongation from RNA polymerase II promoter	IPR001965 (SMART); IPR013083 (G3DSA:3.30.40.GENE3D); IPR013083 (G3DSA:3.30.40.GENE3D); IPR019787 (PFAM); mobidb-lite (MOBIDB_LITE); mobidb-lite (MOBIDB_LITE); mobidb-lite (MOBIDB_LITE); PTHR24102:SF20 (PANTHER); PTHR24102 (PANTHER); IPR019786 (PROSITE_PATTERNS); IPR019787 (PROSITE_PROFILES); cd15535 (CDD); IPR011011 (SUPERFAMILY); IPR011011 (SUPERFAMILY)	no GO terms	no GO terms
[INTERPRO, BLASTED, MAPPED]	gene_ID_unitig9_82	A0A1L0DH42_9ASCOCIC11C00000003470 OS=	152	20	9.73721e-35	58	1	C:GO:0005840	C:ribosome	G3DSA:3.40.30.10 (GENE3D); IPR007741 (PFAM); PTHR13274 (PANTHER); PTHR13274:SF3 (PANTHER)	no GO terms	no GO terms
[INTERPRO, BLASTED]	gene_ID_unitig9_83	A0A1A0H738_9ASCOUncharacterized protein OS=Metschnikowia bicuspidata var. bicuspidata NRRL YB-4993 GN=METBIDRAFT_83818 PE=4 SV=1	340	1	5.81425e-08	51	mobidb-lite (MOBIDB_LITE)	no GO terms	no GO terms
[INTERPRO, BLASTED, MAPPED, ANNOTATED]	gene_ID_unitig9_84	A0A1A0HJU2_9ASCOArginine biosynthesis bifunctional mitochondrial OS=Metschnikowia bicuspidata bicuspidata NRRL YB-4993 GN=METBIDRAFT_117304 PE=3 SV=1	434	20	0	83.35	6	P:GO:0031505; F:GO:0004358; P:GO:0006526; P:GO:0006592; C:GO:0005759; F:GO:0004042	P:fungal-type cell wall organization; F:glutamate N-acetyltransferase activity; P:arginine biosynthetic process; P:ornithine biosynthetic process; C:mitochondrial matrix; F:acetyl-CoA:L-glutamate N-acetyltransferase activity	EC:2.3.1.1; EC:2.3.1.35	Amino-acid N-acetyltransferase; Glutamate N-acetyltransferase	IPR016117 (G3DSA:3.60.70.GENE3D); IPR002813 (TIGRFAM); IPR002813 (PFAM); PTHR23100:SF4 (PANTHER); IPR002813 (PANTHER); PD004193 (PRODOM); IPR002813 (HAMAP); IPR002813 (CDD); IPR016117 (SUPERFAMILY)	F:GO:0004358; P:GO:0006526
[INTERPRO, BLASTED]	gene_ID_unitig9_85	A0A1A0HIU5_9ASCONAD(P)-binding OS=Metschnikowia bicuspidata bicuspidata NRRL YB-4993 GN=METBIDRAFT_76958 PE=3 SV=1	351	20	1.37659e-166	70.7	IPR002347 (PRINTS); IPR002347 (PRINTS); G3DSA:3.40.50.720 (GENE3D); IPR002347 (PFAM); PTHR43550 (PANTHER); PTHR43550:SF1 (PANTHER); cd05339 (CDD); IPR016040 (SUPERFAMILY)	no GO terms	no GO terms
[INTERPRO, BLASTED, MAPPED, ANNOTATED]	gene_ID_unitig9_86	A0A1A0HJT7_9ASCODUF1762-domain-containing OS=Metschnikowia bicuspidata bicuspidata NRRL YB-4993 GN=METBIDRAFT_36002 PE=4 SV=1	332	20	2.77234e-136	62	2	P:GO:0051641; C:GO:0044424	P:cellular localization; C:intracellular part	IPR013883 (PFAM); mobidb-lite (MOBIDB_LITE); mobidb-lite (MOBIDB_LITE); PTHR28063 (PANTHER); PTHR28063:SF2 (PANTHER)	no GO terms	no GO terms
[INTERPRO, BLASTED, MAPPED]	gene_ID_unitig9_87	A0A1A0HJL3_9ASCODNA-directed RNA polymerase OS=Metschnikowia bicuspidata bicuspidata NRRL YB-4993 GN=METBIDRAFT_10255 PE=3 SV=1	1052	20	0	54.5	5	F:GO:0003677; F:GO:0016779; F:GO:0003899; P:GO:0006351; F:GO:0016740	F:DNA binding; F:nucleotidyltransferase activity; F:DNA-directed 5'-3' RNA polymerase activity; P:transcription, DNA-templated; F:transferase activity	IPR029262 (SMART); G3DSA:1.10.150.20 (GENE3D); IPR024075 (G3DSA:1.10.287.GENE3D); G3DSA:3.30.70.370 (GENE3D); IPR029262 (PFAM); IPR029262 (G3DSA:1.10.1320.GENE3D); IPR002092 (PFAM); G3DSA:1.10.287.280 (GENE3D); PTHR10102:SF5 (PANTHER); IPR002092 (PANTHER); IPR002092 (PROSITE_PATTERNS); IPR002092 (PROSITE_PATTERNS); SSF56672 (SUPERFAMILY)	F:GO:0003677; F:GO:0003899; P:GO:0006351	F:DNA binding; F:DNA-directed 5'-3' RNA polymerase activity; P:transcription, DNA-templated
[INTERPRO, BLASTED, MAPPED, ANNOTATED]	gene_ID_unitig9_88	A0A1A0HJA1_9ASCOTransport particle component OS=Metschnikowia bicuspidata bicuspidata NRRL YB-4993 GN=METBIDRAFT_37549 PE=4 SV=1	213	20	7.61603e-117	73.7	2	C:GO:0030008; C:GO:0044431	C:TRAPP complex; C:Golgi apparatus part	G3DSA:3.30.1380.20 (GENE3D); IPR007194 (PFAM); PTHR12817:SF6 (PANTHER); PTHR12817 (PANTHER); cd14944 (CDD); IPR024096 (SUPERFAMILY)	no GO terms	no GO terms
[INTERPRO, BLASTED, MAPPED]	gene_ID_unitig9_89	A0A1L0D6R2_9ASCOCIC11C00000002185 OS=	810	20	1.89929e-168	46.5	3	P:GO:0035023; F:GO:0005089; P:GO:0043547	P:regulation of Rho protein signal transduction; F:Rho guanyl-nucleotide exchange factor activity; P:positive regulation of GTPase activity	G3DSA:1.20.900.10 (GENE3D); IPR000219 (PFAM); mobidb-lite (MOBIDB_LITE); mobidb-lite (MOBIDB_LITE); mobidb-lite (MOBIDB_LITE); IPR000219 (PROSITE_PROFILES); IPR000219 (SUPERFAMILY)	P:GO:0035023; F:GO:0005089	P:regulation of Rho protein signal transduction; F:Rho guanyl-nucleotide exchange factor activity
[INTERPRO, BLASTED, MAPPED, ANNOTATED]	gene_ID_unitig9_90	A0A1L0D6W7_9ASCOCIC11C00000001954 OS=	587	20	0	73.9	4	F:GO:0000166; F:GO:0003676; C:GO:0005737; P:GO:0032995	F:nucleotide binding; F:nucleic acid binding; C:cytoplasm; P:regulation of fungal-type cell wall bio_	genesis	IPR000504 (SMART); IPR000504 (PFAM); G3DSA:3.30.70.330 (GENE3D); G3DSA:3.30.70.330 (GENE3D); mobidb-lite (MOBIDB_LITE); mobidb-lite (MOBIDB_LITE); mobidb-lite (MOBIDB_LITE); mobidb-lite (MOBIDB_LITE); PTHR10501 (PANTHER); IPR000504 (PROSITE_PROFILES); IPR000504 (SUPERFAMILY); IPR000504 (SUPERFAMILY)	F:GO:0003676	F:nucleic acid binding
[INTERPRO, BLASTED, MAPPED, ANNOTATED]	gene_ID_unitig9_91	A0A1A0HJK8_9ASCOKinase OS=Metschnikowia bicuspidata bicuspidata NRRL YB-4993 GN=METBIDRAFT_30422 PE=4 SV=1	380	20	7.63521e-145	64.3	3	F:GO:0000166; F:GO:0004672; P:GO:0016310	F:nucleotide binding; F:protein kinase activity; P:phosphorylation	IPR000719 (SMART); G3DSA:3.30.200.20 (GENE3D); IPR000719 (PFAM); G3DSA:1.10.510.10 (GENE3D); mobidb-lite (MOBIDB_LITE); PTHR24343 (PANTHER); IPR008271 (PROSITE_PATTERNS); IPR000719 (PROSITE_PROFILES); IPR011009 (SUPERFAMILY)	F:GO:0005524; F:GO:0004672; P:GO:0006468	F:ATP binding; F:protein kinase activity; P:protein phosphorylation
[INTERPRO, BLASTED, MAPPED]	gene_ID_unitig9_92	A0A1L0DIF4_9ASCOCIC11C00000003845 OS=	627	20	1.7059e-144	49.3	4	P:GO:0008150; C:GO:0005737; F:GO:0008289; C:GO:0009898	P:biological_process; C:cytoplasm; F:lipid binding; C:cytoplasmic side of plasma membrane	Coil (COILS); Coil (COILS); G3DSA:1.20.120.330 (GENE3D); G3DSA:2.30.30.40 (GENE3D); mobidb-lite (MOBIDB_LITE); IPR027267 (SUPERFAMILY)	no GO terms	no GO terms
[INTERPRO, BLASTED, MAPPED, ANNOTATED]	gene_ID_unitig9_93	A0A1A0HJ78_9ASCOAlpha beta-hydrolase OS=Metschnikowia bicuspidata bicuspidata NRRL YB-4993 GN=METBIDRAFT_117038 PE=4 SV=1	483	20	0	71.75	1	F:GO:0008233	F:peptidase activity	IPR002410 (PRINTS); IPR029058 (G3DSA:3.40.50.GENE3D); IPR000073 (PFAM); PTHR43248:SF1 (PANTHER); PTHR43248 (PANTHER); IPR029058 (SUPERFAMILY)	P:GO:0006508; F:GO:0008233	P:proteolysis; F:peptidase activity
[INTERPRO, BLASTED, MAPPED]	gene_ID_unitig9_94	A0A1L0BK65_9ASCOCIC11C00000004627 OS=	316	20	4.94269e-79	60.05	8	P:GO:0034063; C:GO:0010494; P:GO:0045947; C:GO:0005737; F:GO:0031370; P:GO:0033962; F:GO:0003729; C:GO:0000932	P:stress granule assembly; C:cytoplasmic stress granule; P:negative regulation of translational initiation; C:cytoplasm; F:eukaryotic initiation factor 4G binding; P:cytoplasmic mRNA processing body assembly; F:mRNA binding; C:P-body	IPR025609 (SMART); IPR019050 (SMART); IPR025609 (PFAM); mobidb-lite (MOBIDB_LITE); mobidb-lite (MOBIDB_LITE); PTHR13586:SF6 (PANTHER); PTHR13586 (PANTHER); IPR025761 (PROSITE_PROFILES); IPR025768 (PROSITE_PROFILES); IPR025762 (PROSITE_PROFILES); IPR025609 (CDD); IPR010920 (SUPERFAMILY)	no GO terms	no GO terms
[INTERPRO, BLASTED, MAPPED, ANNOTATED]	gene_ID_unitig9_95	A0A1L0D886_9ASCOCIC11C00000001780 OS=	436	20	0	79.25	13	P:GO:0034243; P:GO:0006366; C:GO:0000775; C:GO:0005730; P:GO:0006348; F:GO:0000991; C:GO:0000781; F:GO:0003677; F:GO:0001076; P:GO:0030702; C:GO:0072686; P:GO:0034401; P:GO:0016973	P:regulation of transcription elongation from RNA polymerase II promoter; P:transcription from RNA polymerase II promoter; C:chromosome, centromeric region; C:nucleolus; P:chromatin silencing at telomere; F:transcription factor activity, core RNA polymerase II binding; C:chromosome, telomeric region; F:DNA binding; F:transcription factor activity, RNA polymerase II transcription factor binding; P…	Coil (COILS); IPR017923 (PFAM); G3DSA:1.20.930.10 (GENE3D); mobidb-lite (MOBIDB_LITE); mobidb-lite (MOBIDB_LITE); mobidb-lite (MOBIDB_LITE); PTHR22908 (PANTHER); PTHR22908:SF71 (PANTHER); IPR017923 (PROSITE_PROFILES)	C:GO:0005634	C:nucleus
[INTERPRO, BLASTED, MAPPED, ANNOTATED]	gene_ID_unitig9_96	A0A1L0DIE6_9ASCOCIC11C00000002396 OS=	145	20	6.13972e-101	99.3	3	F:GO:0003735; C:GO:0015935; P:GO:0006412	F:structural constituent of ribosome; C:small ribosomal subunit; P:translation	IPR006032 (PIRSF); G3DSA:2.40.50.140 (GENE3D); IPR005680 (TIGRFAM); IPR006032 (PFAM); IPR006032 (PANTHER); PTHR11652:SF30 (PANTHER); IPR006032 (PROSITE_PATTERNS); IPR005680 (CDD); IPR012340 (SUPERFAMILY)	F:GO:0003735; C:GO:0015935; C:GO:0005840; C:GO:0005622; P:GO:0006412	F:structural constituent of ribosome; C:small ribosomal subunit; C:ribosome; C:intracellular; P:translation
[INTERPRO, BLASTED, MAPPED, ANNOTATED]	gene_ID_unitig9_97	A0A1A0HJ73_9ASCOMitochondrial carrier OS=Metschnikowia bicuspidata bicuspidata NRRL YB-4993 GN=METBIDRAFT_35058 PE=3 SV=1	346	20	0	78.2	5	P:GO:0006635; C:GO:0005779; F:GO:0000295; P:GO:0007031; P:GO:0015867	P:fatty acid beta-oxidation; C:integral component of peroxisomal membrane; F:adenine nucleotide transmembrane transporter activity; P:peroxisome organization; P:ATP transport	IPR023395 (G3DSA:1.50.40.GENE3D); IPR018108 (PFAM); PTHR24089:SF457 (PANTHER); PTHR24089 (PANTHER); IPR018108 (PROSITE_PROFILES); IPR018108 (PROSITE_PROFILES); IPR018108 (PROSITE_PROFILES); IPR023395 (SUPERFAMILY); TMhelix (TMHMM); TMhelix (TMHMM)	no GO terms	no GO terms
[INTERPRO, BLASTED, MAPPED]	gene_ID_unitig9_98	A0A1L0BPT0_9ASCOCIC11C00000001937 OS=	417	20	0	61.55	3	P:GO:0008150; C:GO:0005737; F:GO:0003674	P:biological_process; C:cytoplasm; F:molecular_function	IPR001680 (SMART); IPR015943 (G3DSA:2.130.10.GENE3D); IPR015943 (G3DSA:2.130.10.GENE3D); IPR001680 (PROSITE_PROFILES); IPR017986 (PROSITE_PROFILES); IPR006594 (PROSITE_PROFILES); IPR017986 (SUPERFAMILY)	F:GO:0005515	F:protein binding
[INTERPRO, BLASTED, MAPPED, ANNOTATED]	gene_ID_unitig9_99	A0A1A0HJ85_9ASCONADH-cytochrome b5 reductase OS=Metschnikowia bicuspidata bicuspidata NRRL YB-4993 GN=METBIDRAFT_34080 PE=3 SV=1	790	20	0	74.9	8	C:GO:0031307; F:GO:0004128; C:GO:0005758; P:GO:0006696; P:GO:0034599; P:GO:0055114; P:GO:0006397; F:GO:0016787	C:integral component of mitochondrial outer membrane; F:cytochrome-b5 reductase activity, acting on NAD(P)H; C:mitochondrial intermembrane space; P:ergosterol biosynthetic process; P:cellular response to oxidative stress; P:oxidation-reduction process; P:mRNA processing; F:hydrolase activity	EC:1.6.2.2	Cytochrome-b5 reductase	IPR001709 (PRINTS); IPR001834 (PRINTS); IPR007708 (SMART); IPR001433 (PFAM); IPR007708 (PFAM); IPR029052 (G3DSA:3.60.21.GENE3D); G3DSA:3.40.50.80 (GENE3D); IPR008333 (PFAM); G3DSA:2.40.30.10 (GENE3D); mobidb-lite (MOBIDB_LITE); PTHR12849 (PANTHER); PTHR12849:SF1 (PANTHER); IPR017927 (PROSITE_PROFILES); cd06183 (CDD); IPR029052 (SUPERFAMILY); IPR017938 (SUPERFAMILY); SSF52343 (SUPERFAMILY)	F:GO:0016788; F:GO:0016491; P:GO:0055114; P:GO:0006397
[INTERPRO, BLASTED, MAPPED, ANNOTATED]	gene_ID_unitig9_100	A0A1A0HIS5_9ASCOATP-dependent (S)-NAD(P)H-hydrate dehydratase OS=Metschnikowia bicuspidata bicuspidata NRRL YB-4993 GN=METBIDRAFT_76943 PE=3 SV=1	356	20	0	75	5	F:GO:0000166; C:GO:0005737; F:GO:0047453; P:GO:0046496; F:GO:0052855	F:nucleotide binding; C:cytoplasm; F:ATP-dependent NAD(P)H-hydrate dehydratase activity; P:nicotinamide nucleotide metabolic process; F:ADP-dependent NAD(P)H-hydrate dehydratase activity	EC:4.2.1.93	ATP-dependent NAD(P)H-hydrate dehydratase	IPR000631 (TIGRFAM); IPR000631 (PFAM); IPR029056 (G3DSA:3.40.1190.GENE3D); PTHR12592 (PANTHER); PTHR12592:SF2 (PANTHER); IPR017953 (PROSITE_PATTERNS); IPR000631 (PROSITE_PROFILES); IPR000631 (HAMAP); IPR000631 (CDD); IPR029056 (SUPERFAMILY)	F:GO:0052855
[INTERPRO, BLASTED]	gene_ID_unitig9_101	A0A1L0G6N2_9ASCOCIC11C00000003150 OS=	431	20	6.95785e-111	49.55	mobidb-lite (MOBIDB_LITE); mobidb-lite (MOBIDB_LITE); mobidb-lite (MOBIDB_LITE); PTHR10130:SF8 (PANTHER); IPR024111 (PANTHER)	no GO terms	no GO terms
[INTERPRO, BLASTED, MAPPED, ANNOTATED]	gene_ID_unitig9_102	A0A1A0HJ80_9ASCOGlycerol-3-phosphate dehydrogenase	370	20	0	89.75	7	P:GO:0005975; F:GO:0042803; C:GO:0009331; F:GO:0051287; P:GO:0046168; P:GO:0055114; F:GO:0004367	P:carbohydrate metabolic process; F:protein homodimerization activity; C:glycerol-3-phosphate dehydrogenase complex; F:NAD binding; P:glycerol-3-phosphate catabolic process; P:oxidation-reduction process; F:glycerol-3-phosphate dehydrogenase [NAD+] activity	EC:1.1.1.8; EC:1.1.1.94	Glycerol-3-phosphate dehydrogenase (NAD(+)); Glycerol-3-phosphate dehydrogenase (NAD(P)(+))	IPR006168 (PRINTS); IPR011128 (PFAM); IPR006109 (PFAM); IPR006168 (PIRSF); IPR017751 (TIGRFAM); IPR013328 (G3DSA:1.10.1040.GENE3D); G3DSA:3.40.50.720 (GENE3D); PTHR11728 (PANTHER); PTHR11728:SF22 (PANTHER); IPR006168 (PROSITE_PATTERNS); IPR008927 (SUPERFAMILY); IPR016040 (SUPERFAMILY)	P:GO:0006072; P:GO:0005975; F:GO:0042803; F:GO:0016616; C:GO:0009331; F:GO:0051287; P:GO:0046168; F:GO:0016491; P:GO:0055114; F:GO:0004367
[INTERPRO, BLASTED, MAPPED, ANNOTATED]	gene_ID_unitig9_103	A0A1L0D6Z4_9ASCOCIC11C00000000268 OS=	471	20	4.71772e-104	74.4	1	F:GO:0016787	F:hydrolase activity	G3DSA:3.90.79.10 (GENE3D); IPR000086 (PFAM); mobidb-lite (MOBIDB_LITE); mobidb-lite (MOBIDB_LITE); PTHR12992 (PANTHER); PTHR12992:SF20 (PANTHER); IPR000086 (PROSITE_PROFILES); cd03426 (CDD); IPR015797 (SUPERFAMILY)	F:GO:0016787	F:hydrolase activity
[INTERPRO, BLASTED]	gene_ID_unitig9_104	A0A1L0BNM1_9ASCOCIC11C00000002103 OS=	341	20	9.54178e-56	50.15	mobidb-lite (MOBIDB_LITE); mobidb-lite (MOBIDB_LITE); PTHR31996:SF3 (PANTHER); PTHR31996 (PANTHER); PD102351 (PRODOM)	no GO terms	no GO terms
[INTERPRO, BLASTED]	gene_ID_unitig9_105	A0A1A0HJR2_9ASCOBrix-domain-containing OS=Metschnikowia bicuspidata bicuspidata NRRL YB-4993 GN=METBIDRAFT_34430 PE=4 SV=1	418	20	0	79.6	Coil (COILS); IPR007109 (SMART); G3DSA:3.40.50.10480 (GENE3D); IPR007109 (PFAM); mobidb-lite (MOBIDB_LITE); mobidb-lite (MOBIDB_LITE); PTHR12661 (PANTHER); PTHR12661:SF9 (PANTHER); IPR007109 (PROSITE_PROFILES)	no GO terms	no GO terms
[INTERPRO, BLASTED, MAPPED, ANNOTATED]	gene_ID_unitig9_106	A0A1A0HJI8_9ASCODEAD-domain-containing OS=Metschnikowia bicuspidata bicuspidata NRRL YB-4993 GN=METBIDRAFT_10235 PE=3 SV=1	480	20	0	89.3	6	C:GO:0005634; F:GO:0005524; P:GO:0000462; F:GO:0003723; C:GO:0005829; F:GO:0004004	C:nucleus; F:ATP binding; P:maturation of SSU-rRNA from tricistronic rRNA transcript (SSU-rRNA, 5.8S rRNA, LSU-rRNA); F:RNA binding; C:cytosol; F:ATP-dependent RNA helicase activity	EC:3.6.1.3; EC:3.6.1.15	Adenosinetriphosphatase; Nucleoside-triphosphate phosphatase	IPR014001 (SMART); IPR001650 (SMART); G3DSA:3.40.50.300 (GENE3D); IPR011545 (PFAM); G3DSA:3.40.50.300 (GENE3D); IPR001650 (PFAM); mobidb-lite (MOBIDB_LITE); PTHR24031 (PANTHER); PTHR24031:SF405 (PANTHER); IPR000629 (PROSITE_PATTERNS); IPR001650 (PROSITE_PROFILES); IPR014014 (PROSITE_PROFILES); IPR014001 (PROSITE_PROFILES); cd00079 (CDD); cd00268 (CDD); IPR027417 (SUPERFAMILY)	F:GO:0003676; F:GO:0005524
[INTERPRO, BLASTED, MAPPED]	gene_ID_unitig9_107	A0A1A0HJ75_9ASCOFYVE-domain-containing OS=Metschnikowia bicuspidata bicuspidata NRRL YB-4993 GN=METBIDRAFT_36392 PE=4 SV=1	325	20	3.70013e-135	55.7	8	F:GO:0004842; F:GO:0008270; F:GO:0046872; C:GO:0000329; C:GO:0005770; F:GO:0032266; F:GO:0016874; P:GO:0016567	F:ubiquitin-protein transferase activity; F:zinc ion binding; F:metal ion binding; C:fungal-type vacuole membrane; C:late endosome; F:phosphatidylinositol-3-phosphate binding; F:ligase activity; P:protein ubiquitination	IPR001841 (SMART); IPR000306 (SMART); IPR013083 (G3DSA:3.30.40.GENE3D); IPR000306 (PFAM); IPR013083 (G3DSA:3.30.40.GENE3D); IPR001841 (PFAM); mobidb-lite (MOBIDB_LITE); PTHR13510 (PANTHER); IPR001841 (PROSITE_PROFILES); IPR017455 (PROSITE_PROFILES); IPR001841 (CDD); IPR011011 (SUPERFAMILY); SSF57850 (SUPERFAMILY)	F:GO:0046872	F:metal ion binding
[INTERPRO, BLASTED, MAPPED, ANNOTATED]	gene_ID_unitig9_108	A0A1L0DIC5_9ASCOCIC11C00000003079 OS=	126	20	7.97412e-54	70.85	8	P:GO:0000122; C:GO:0070847; C:GO:0016592; C:GO:0005829; F:GO:0001106; F:GO:0001105; P:GO:0045944; F:GO:0001103	P:negative regulation of transcription from RNA polymerase II promoter; C:core mediator complex; C:mediator complex; C:cytosol; F:RNA polymerase II transcription corepressor activity; F:RNA polymerase II transcription coactivator activity; P:positive regulation of transcription from RNA polymerase II promoter; F:RNA polymerase II repressing transcription factor binding	IPR021384 (PFAM); mobidb-lite (MOBIDB_LITE); IPR021384 (PANTHER); PTHR13381:SF1 (PANTHER); SSF140718 (SUPERFAMILY)	no GO terms	no GO terms
[INTERPRO, BLASTED, MAPPED]	gene_ID_unitig12_1	A0A1L0BJ95_9ASCOCIC11C00000002465 OS=	919	20	0	57.55	10	F:GO:0003677; C:GO:0005634; F:GO:0008270; P:GO:0006351; F:GO:0046872; C:GO:0016020; C:GO:0016021; P:GO:0006355; F:GO:0000981; P:GO:0006357	F:DNA binding; C:nucleus; F:zinc ion binding; P:transcription, DNA-templated; F:metal ion binding; C:membrane; C:integral component of membrane; P:regulation of transcription, DNA-templated; F:RNA polymerase II transcription factor activity, sequence-specific DNA binding; P:regulation of transcription from RNA polymerase II promoter	IPR007219 (SMART); IPR001138 (SMART); IPR007219 (PFAM); IPR001138 (PFAM); IPR001138 (G3DSA:4.10.240.GENE3D); mobidb-lite (MOBIDB_LITE); mobidb-lite (MOBIDB_LITE); mobidb-lite (MOBIDB_LITE); PTHR31944 (PANTHER); PTHR31944:SF106 (PANTHER); IPR001138 (PROSITE_PATTERNS); IPR001138 (PROSITE_PROFILES); IPR001138 (CDD); cd12148 (CDD); IPR001138 (SUPERFAMILY)	C:GO:0005634; F:GO:0003677; F:GO:0008270; P:GO:0006351; P:GO:0006355; F:GO:0000981	C:nucleus; F:DNA binding; F:zinc ion binding; P:transcription, DNA-templated; P:regulation of transcription, DNA-templated; F:RNA polymerase II transcription factor activity, sequence-specific DNA binding
[INTERPRO, BLASTED, MAPPED, ANNOTATED]	gene_ID_unitig12_2	A0A1L0BG67_9ASCOCIC11C00000004790 OS=	584	20	5.70802e-91	65.4	4	P:GO:0000122; C:GO:0005634; F:GO:0043565; P:GO:0048518	P:negative regulation of transcription from RNA polymerase II promoter; C:nucleus; F:sequence-specific DNA binding; P:positive regulation of biological process	IPR013087 (SMART); G3DSA:3.30.160.60 (GENE3D); G3DSA:3.30.160.60 (GENE3D); PF00096 (PFAM); G3DSA:3.30.160.60 (GENE3D); mobidb-lite (MOBIDB_LITE); mobidb-lite (MOBIDB_LITE); mobidb-lite (MOBIDB_LITE); mobidb-lite (MOBIDB_LITE); mobidb-lite (MOBIDB_LITE); PTHR14596 (PANTHER); IPR013087 (PROSITE_PATTERNS); IPR013087 (PROSITE_PATTERNS); IPR013087 (PROSITE_PROFILES); IPR013087 (PROSITE_PROFILES); IPR0…	F:GO:0003676	F:nucleic acid binding
[INTERPRO, BLASTED, MAPPED, ANNOTATED]	gene_ID_unitig12_3	A0A1L0DGB5_9ASCOCIC11C00000001404 OS=	325	20	1.94815e-128	63.4	5	C:GO:0005634; P:GO:0016239; F:GO:0016538; P:GO:0045859; C:GO:0000307	C:nucleus; P:positive regulation of macroautophagy; F:cyclin-dependent protein serine/threonine kinase regulator activity; P:regulation of protein kinase activity; C:cyclin-dependent protein kinase holoenzyme complex	IPR013763 (G3DSA:1.10.472.GENE3D); PTHR15615 (PANTHER); PTHR15615:SF38 (PANTHER)	no GO terms	no GO terms
[INTERPRO, BLASTED, MAPPED, ANNOTATED]	gene_ID_unitig12_4	C5E4S8_ZYGRCZYRO0E08470p OS=Zygosaccharomyces rouxii (strain ATCC 2623 CBS 732 NBRC 1130 NCYC 568 NRRL Y-229) GN=ZYRO0E08470g PE=4 SV=1	230	20	3.09651e-52	70.95	2	F:GO:0016740; P:GO:0009987	F:transferase activity; P:cellular process	Coil (COILS); Coil (COILS); IPR019098 (SMART); IPR019098 (PFAM); mobidb-lite (MOBIDB_LITE)	no GO terms	no GO terms
[INTERPRO, BLASTED, MAPPED, ANNOTATED]	gene_ID_unitig12_5	A0A1L0BJV0_9ASCOCIC11C00000003136 OS=	123	20	4.02493e-75	74.2	7	C:GO:0046540; C:GO:0005682; C:GO:0005829; C:GO:0071004; C:GO:0005686; C:GO:0005685; P:GO:0000398	C:U4/U6 x U5 tri-snRNP complex; C:U5 snRNP; C:cytosol; C:U2-type prespliceosome; C:U2 snRNP; C:U1 snRNP; P:mRNA splicing, via spliceosome	IPR001163 (SMART); G3DSA:2.30.30.100 (GENE3D); IPR001163 (PFAM); mobidb-lite (MOBIDB_LITE); PTHR10701:SF8 (PANTHER); PTHR10701 (PANTHER); cd01717 (CDD); IPR010920 (SUPERFAMILY)	no GO terms	no GO terms
[INTERPRO, BLASTED, MAPPED]	gene_ID_unitig12_6	B9W6M9_CANDCTransposable element OS=Candida dubliniensis (strain CD36 ATCC MYA-646 CBS 7987 NCPF 3949 NRRL Y-17841) GN=Cd36_00730 PE=4 SV=1	624	7	9.93215e-33	46.14	4	F:GO:0003676; C:GO:0016020; C:GO:0016021; P:GO:0015074	F:nucleic acid binding; C:membrane; C:integral component of membrane; P:DNA integration	no IPS match	no IPS match	no IPS match
[INTERPRO, BLASTED, MAPPED, ANNOTATED]	gene_ID_unitig12_7	A0A1A0HJL9_9ASCOSPT16-domain-containing OS=Metschnikowia bicuspidata bicuspidata NRRL YB-4993 GN=METBIDRAFT_77033 PE=4 SV=1	1249	20	0	82.5	12	P:GO:0051301; P:GO:0006281; C:GO:0035101; C:GO:0000790; P:GO:0006261; P:GO:0034401; C:GO:0031298; C:GO:0044732; P:GO:0034724; P:GO:0006334; P:GO:0006368; P:GO:0045899	P:cell division; P:DNA repair; C:FACT complex; C:nuclear chromatin; P:DNA-dependent DNA replication; P:chromatin organization involved in regulation of transcription; C:replication fork protection complex; C:mitotic spindle pole body; P:DNA replication-independent nucleosome organization; P:nucleosome assembly; P:transcription elongation from RNA polymerase II promoter; P:positive regulation of R…	PR00449 (PRINTS); SM00173 (SMART); IPR013953 (SMART); SM00176 (SMART); SM00174 (SMART); IPR013719 (SMART); SM00175 (SMART); IPR029148 (SMART); IPR013953 (PFAM); G3DSA:3.40.50.300 (GENE3D); G3DSA:3.90.230.10 (GENE3D); IPR029149 (G3DSA:3.40.350.GENE3D); IPR000994 (PFAM); IPR013719 (PFAM); IPR005225 (TIGRFAM); IPR001806 (PFAM); IPR029148 (PFAM); G3DSA:3.30.70.1390 (GENE3D); mobidb-lite (MOBIDB_LITE)…	F:GO:0005525; F:GO:0003924	F:GTP binding; F:GTPase activity
[INTERPRO, BLASTED, MAPPED, ANNOTATED]	gene_ID_unitig12_8	A0A1A0HJY1_9ASCODNA primase large subunit OS=Metschnikowia bicuspidata bicuspidata NRRL YB-4993 GN=METBIDRAFT_37309 PE=3 SV=1	514	20	0	78.7	10	C:GO:0005635; F:GO:0003896; F:GO:0003677; C:GO:0005658; F:GO:0046872; C:GO:0005829; F:GO:0051539; C:GO:1990077; P:GO:0006269; P:GO:0006302	C:nuclear envelope; F:DNA primase activity; F:DNA binding; C:alpha DNA polymerase:primase complex; F:metal ion binding; C:cytosol; F:4 iron, 4 sulfur cluster binding; C:primosome complex; P:DNA replication, synthesis of RNA primer; P:double-strand break repair	EC:2.7.7.6	DNA-directed RNA polymerase	IPR016558 (PIRSF); IPR007238 (PFAM); mobidb-lite (MOBIDB_LITE); PTHR10537 (PANTHER); IPR016558 (CDD)	F:GO:0003896; F:GO:0016779; P:GO:0006269
[INTERPRO, BLASTED, MAPPED, ANNOTATED]	gene_ID_unitig12_9	A0A1L0D4J7_9ASCOCIC11C00000003913 OS=	301	20	7.26174e-142	74.1	1	C:GO:0016020	C:membrane	PTHR12652 (PANTHER); PTHR12652:SF32 (PANTHER)	no GO terms	no GO terms
[INTERPRO, BLASTED, MAPPED, ANNOTATED]	gene_ID_unitig12_10	A0A1A0HJ63_9ASCOXanthine uracil permease OS=Metschnikowia bicuspidata bicuspidata NRRL YB-4993 GN=METBIDRAFT_30525 PE=4 SV=1	569	20	0	85.15	3	P:GO:0055085; C:GO:0016021; F:GO:0005215	P:transmembrane transport; C:integral component of membrane; F:transporter activity	IPR006043 (PFAM); IPR006042 (TIGRFAM); PTHR42810 (PANTHER); PTHR42810:SF3 (PANTHER); TMhelix (TMHMM); TMhelix (TMHMM); TMhelix (TMHMM); TMhelix (TMHMM); TMhelix (TMHMM); TMhelix (TMHMM); TMhelix (TMHMM); TMhelix (TMHMM); TMhelix (TMHMM); TMhelix (TMHMM); TMhelix (TMHMM)	P:GO:0055085; C:GO:0016020; P:GO:0006810; F:GO:0005215	P:transmembrane transport; C:membrane; P:transport; F:transporter activity
[INTERPRO, BLASTED, MAPPED, ANNOTATED]	gene_ID_unitig12_11	A0A1L0BJ81_9ASCOCIC11C00000004099 OS=	873	20	0	63.3	1	C:GO:0016020	C:membrane	Coil (COILS); IPR007074 (PFAM); mobidb-lite (MOBIDB_LITE); PTHR15407:SF36 (PANTHER); IPR009644 (PANTHER)	no GO terms	no GO terms
[INTERPRO, BLASTED, MAPPED, ANNOTATED]	gene_ID_unitig12_12	A0A1A0HJM3_9ASCOHLH-domain-containing (Fragment) OS=Metschnikowia bicuspidata bicuspidata NRRL YB-4993 GN=METBIDRAFT_28357 PE=4 SV=1	262	20	7.75891e-103	82.25	22	P:GO:0009086; C:GO:0089713; P:GO:0061432; P:GO:0006021; P:GO:1900375; F:GO:0000978; P:GO:0061427; P:GO:0006366; P:GO:0007059; F:GO:0046983; P:GO:1900478; C:GO:0000776; P:GO:0000103; F:GO:0001103; F:GO:0001102; C:GO:0005634; F:GO:0001078; F:GO:0001077; P:GO:0006338; F:GO:0001076; C:GO:0005739; F:GO:0019237	P:methionine biosynthetic process; C:Cbf-1Met4-Met28 complex; P:regulation of transcription from RNA polymerase II promoter in response to methionine; P:inositol biosynthetic process; P:positive regulation of inositol biosynthetic process by positive regulation of transcription from RNA polymerase II promoter; F:RNA polymerase II core promoter proximal region sequence-specific DNA binding; P:nega…	Coil (COILS); IPR011598 (SMART); IPR011598 (PFAM); IPR011598 (G3DSA:4.10.280.GENE3D); mobidb-lite (MOBIDB_LITE); mobidb-lite (MOBIDB_LITE); PTHR12565 (PANTHER); PTHR12565:SF213 (PANTHER); IPR011598 (PROSITE_PROFILES); IPR011598 (CDD); IPR011598 (SUPERFAMILY)	F:GO:0046983	F:protein dimerization activity
[INTERPRO, BLASTED, MAPPED, ANNOTATED]	gene_ID_unitig12_13	A0A1A0HK69_9ASCOPyruvate decarboxylase OS=Metschnikowia bicuspidata bicuspidata NRRL YB-4993 GN=METBIDRAFT_38271 PE=3 SV=1	562	20	0	87.55	8	F:GO:0000287; F:GO:0030976; F:GO:0004737; C:GO:0005737; C:GO:0005886; C:GO:0030446; C:GO:0009986; C:GO:0030445	F:magnesium ion binding; F:thiamine pyrophosphate binding; F:pyruvate decarboxylase activity; C:cytoplasm; C:plasma membrane; C:hyphal cell wall; C:cell surface; C:yeast-form cell wall	EC:4.1.1.1	Pyruvate decarboxylase	IPR012000 (PFAM); G3DSA:3.40.50.970 (GENE3D); G3DSA:3.40.50.970 (GENE3D); IPR012110 (PIRSF); IPR012001 (PFAM); IPR029035 (G3DSA:3.40.50.GENE3D); IPR011766 (PFAM); PTHR43452:SF4 (PANTHER); PTHR43452 (PANTHER); IPR000399 (PROSITE_PATTERNS); cd02005 (CDD); cd07038 (CDD); IPR029061 (SUPERFAMILY); IPR029061 (SUPERFAMILY); IPR029035 (SUPERFAMILY)	F:GO:0030976; F:GO:0000287; F:GO:0003824; F:GO:0016831
[INTERPRO, BLASTED, MAPPED, ANNOTATED]	gene_ID_unitig12_14	A0A1A0HJ68_9ASCOMitochondrial ABC transporter OS=Metschnikowia bicuspidata bicuspidata NRRL YB-4993 GN=METBIDRAFT_77041 PE=4 SV=1	681	20	0	87.35	7	P:GO:0006879; F:GO:0005524; F:GO:0042626; P:GO:0006811; P:GO:0055085; C:GO:0016021; C:GO:0005743	P:cellular iron ion homeostasis; F:ATP binding; F:ATPase activity, coupled to transmembrane movement of substances; P:ion transport; P:transmembrane transport; C:integral component of membrane; C:mitochondrial inner membrane	EC:3.6.1.3; EC:3.6.1.15	Adenosinetriphosphatase; Nucleoside-triphosphate phosphatase	IPR003593 (SMART); G3DSA:1.20.1560.10 (GENE3D); IPR011527 (PFAM); G3DSA:3.40.50.300 (GENE3D); IPR003439 (PFAM); mobidb-lite (MOBIDB_LITE); PTHR24221 (PANTHER); PTHR24221:SF281 (PANTHER); IPR017871 (PROSITE_PATTERNS); IPR011527 (PROSITE_PROFILES); IPR003439 (PROSITE_PROFILES); cd03253 (CDD); IPR011527 (SUPERFAMILY); IPR027417 (SUPERFAMILY); TMhelix (TMHMM); TMhelix (TMHMM); TMhelix (TMHMM); TMheli…	F:GO:0016887; F:GO:0005524; F:GO:0042626; P:GO:0055085; C:GO:0016021; P:GO:0006810
[INTERPRO, BLASTED, MAPPED, ANNOTATED]	gene_ID_unitig12_15	A0A1L0DE13_9ASCOCIC11C00000003626 OS=	928	20	0	63.2	1	F:GO:0070011	F:peptidase activity, acting on L-amino acid peptides	IPR014782 (PRINTS); G3DSA:2.60.40.1730 (GENE3D); G3DSA:1.10.390.10 (GENE3D); IPR014782 (PFAM); IPR024571 (PFAM); IPR001930 (PANTHER); IPR033514 (PTHR11533:PANTHER); SSF55486 (SUPERFAMILY); SSF63737 (SUPERFAMILY)	F:GO:0008270; P:GO:0006508; F:GO:0008237	F:zinc ion binding; P:proteolysis; F:metallopeptidase activity
[INTERPRO, BLASTED]	gene_ID_unitig12_16	A0A1A0HJM8_9ASCOUncharacterized protein OS=Metschnikowia bicuspidata var. bicuspidata NRRL YB-4993 GN=METBIDRAFT_10360 PE=4 SV=1	209	3	6.82844e-11	64.67	mobidb-lite (MOBIDB_LITE)	no GO terms	no GO terms
[INTERPRO, BLASTED, MAPPED, ANNOTATED]	gene_ID_unitig12_17	A0A1A0HK74_9ASCOKinase OS=Metschnikowia bicuspidata bicuspidata NRRL YB-4993 GN=METBIDRAFT_34241 PE=3 SV=1	440	20	0	93.1	18	P:GO:0006281; F:GO:0042802; C:GO:0033551; P:GO:0007067; P:GO:0002098; F:GO:0004674; P:GO:0006468; C:GO:0005886; P:GO:0051455; C:GO:0005634; F:GO:0005524; C:GO:0005934; P:GO:0006888; C:GO:0005737; C:GO:0005935; P:GO:0042273; C:GO:0005816; P:GO:0042274	P:DNA repair; F:identical protein binding; C:monopolin complex; P:mitotic nuclear division; P:tRNA wobble uridine modification; F:protein serine/threonine kinase activity; P:protein phosphorylation; C:plasma membrane; P:attachment of spindle microtubules to kinetochore involved in homologous chromosome segregation; C:nucleus; F:ATP binding; C:cellular bud tip; P:ER to Golgi vesicle-mediated trans…	genesis; C:spindle pole body; P:ribosomal small subunit bio_	genesis	EC:2.7.11	Transferring phosphorus-containing groups
[INTERPRO, BLASTED, MAPPED, ANNOTATED]	gene_ID_unitig12_18	A0A1A0HJ72_9ASC pseudouridine synthase OS=Metschnikowia bicuspidata bicuspidata NRRL YB-4993 GN=METBIDRAFT_34192 PE=3 SV=1	505	20	0	77.7	6	C:GO:0005634; F:GO:0003723; P:GO:0031119; P:GO:0031120; F:GO:0009982; P:GO:1990481	C:nucleus; F:RNA binding; P:tRNA pseudouridine synthesis; P:snRNA pseudouridine synthesis; F:pseudouridine synthase activity; P:mRNA pseudouridine synthesis	EC:5.4.99.12	tRNA pseudouridine(38-40) synthase	IPR001406 (TIGRFAM); IPR020095 (G3DSA:3.30.70.GENE3D); G3DSA:3.30.70.580 (GENE3D); IPR020097 (PFAM); mobidb-lite (MOBIDB_LITE); PTHR11142:SF17 (PANTHER); IPR001406 (PANTHER); cd02568 (CDD); IPR020103 (SUPERFAMILY)	P:GO:0001522; F:GO:0003723; P:GO:0009451; F:GO:0009982
[INTERPRO, BLASTED, MAPPED, ANNOTATED]	gene_ID_unitig12_19	A0A1A0HJL6_9ASCO60S ribosome subunit bio_	genesis NIP7 OS=Metschnikowia bicuspidata bicuspidata NRRL YB-4993 GN=METBIDRAFT_30534 PE=3 SV=1	181	20	4.33079e-131	94.05	7	P:GO:0000463; C:GO:0005634; F:GO:0003723; C:GO:0005737; P:GO:0042255; P:GO:1902626; C:GO:0030687	P:maturation of LSU-rRNA from tricistronic rRNA transcript (SSU-rRNA, 5.8S rRNA, LSU-rRNA); C:nucleus; F:RNA binding; C:cytoplasm; P:ribosome assembly; P:assembly of large subunit precursor of preribosome; C:preribosome, large subunit precursor	IPR002478 (SMART); IPR016686 (PIRSF); IPR002478 (G3DSA:2.30.130.GENE3D); IPR005155 (PFAM); PTHR23415 (PANTHER); PTHR23415:SF25 (PANTHER); IPR002478 (PROSITE_PROFILES); IPR015947 (SUPERFAMILY); SSF88802 (SUPERFAMILY)	C:GO:0005634; F:GO:0003723; P:GO:0042255	C:nucleus; F:RNA binding; P:ribosome assembly
[INTERPRO, BLASTED, MAPPED, ANNOTATED]	gene_ID_unitig12_20	A0A1L0DG83_9ASCOCIC11C00000000729 OS=	481	20	0	64.25	2	C:GO:0005739; C:GO:0005840	C:mitochondrion; C:ribosome	G3DSA:3.40.50.300 (GENE3D); IPR017082 (PIRSF); IPR019368 (PFAM); PTHR12810 (PANTHER)	P:GO:0032543; C:GO:0005763	P:mitochondrial translation; C:mitochondrial small ribosomal subunit
[INTERPRO, BLASTED, MAPPED, ANNOTATED]	gene_ID_unitig12_21	A0A1A0HJZ5_9ASCOp-loop containing nucleoside triphosphate hydrolase OS=Metschnikowia bicuspidata bicuspidata NRRL YB-4993 GN=METBIDRAFT_86235 PE=4 SV=1	571	20	0	75.45	6	F:GO:0005524; P:GO:0016070; F:GO:1990400; C:GO:0005759; P:GO:1902775; F:GO:0004004	F:ATP binding; P:RNA metabolic process; F:mitochondrial ribosomal large subunit rRNA binding; C:mitochondrial matrix; P:mitochondrial large ribosomal subunit assembly; F:ATP-dependent RNA helicase activity	EC:3.6.1.3; EC:3.6.1.15	Adenosinetriphosphatase; Nucleoside-triphosphate phosphatase	IPR014001 (SMART); IPR001650 (SMART); IPR001650 (PFAM); IPR011545 (PFAM); G3DSA:3.40.50.300 (GENE3D); G3DSA:3.40.50.300 (GENE3D); PTHR24031 (PANTHER); PTHR24031:SF406 (PANTHER); IPR001650 (PROSITE_PROFILES); IPR014001 (PROSITE_PROFILES); cd00079 (CDD); IPR027417 (SUPERFAMILY)	F:GO:0003676; F:GO:0005524
[INTERPRO, BLASTED, MAPPED, ANNOTATED]	gene_ID_unitig12_22	A0A1L0BJS0_9ASCOCIC11C00000005489 OS=	388	20	0	72.1	6	F:GO:0000210; C:GO:0005634; C:GO:0005777; P:GO:0006734; F:GO:0046872; C:GO:0005829	F:NAD+ diphosphatase activity; C:nucleus; C:peroxisome; P:NADH metabolic process; F:metal ion binding; C:cytosol	EC:3.6.1.22; EC:3.6.1.9	NAD(+) diphosphatase; Nucleotide diphosphatase	IPR000086 (PFAM); G3DSA:3.90.79.10 (GENE3D); PTHR42904 (PANTHER); PTHR42904:SF2 (PANTHER); IPR000086 (PROSITE_PROFILES); cd03429 (CDD); IPR015797 (SUPERFAMILY)	F:GO:0016787
[INTERPRO, BLASTED, MAPPED, ANNOTATED]	gene_ID_unitig12_23	A0A1A0HJ77_9ASCOPLC-like phosphodiesterase OS=Metschnikowia bicuspidata bicuspidata NRRL YB-4993 GN=METBIDRAFT_38433 PE=4 SV=1	379	20	0	67.05	4	C:GO:0043229; P:GO:0046475; P:GO:0036164; F:GO:0008081	C:intracellular organelle; P:glycerophospholipid catabolic process; P:cell-abiotic substrate adhesion; F:phosphoric diester hydrolase activity	IPR017946 (G3DSA:3.20.20.GENE3D); IPR030395 (PFAM); PTHR42758:SF2 (PANTHER); PTHR42758 (PANTHER); IPR030395 (PROSITE_PROFILES); IPR017946 (SUPERFAMILY)	P:GO:0006629; F:GO:0008081	P:lipid metabolic process; F:phosphoric diester hydrolase activity
[INTERPRO, BLASTED, MAPPED, ANNOTATED]	gene_ID_unitig12_24	A0A1L0BKD5_9ASCOCIC11C00000002043 OS=	320	20	4.54535e-150	64.65	3	C:GO:1902494; C:GO:0005684; P:GO:0000398	C:catalytic complex; C:U2-type spliceosomal complex; P:mRNA splicing, via spliceosome	Coil (COILS); IPR004015 (PFAM); mobidb-lite (MOBIDB_LITE); mobidb-lite (MOBIDB_LITE); mobidb-lite (MOBIDB_LITE); PTHR12096:SF1 (PANTHER); IPR017862 (PANTHER)	C:GO:0005681; P:GO:0000398	C:spliceosomal complex; P:mRNA splicing, via spliceosome
[INTERPRO, BLASTED, MAPPED]	gene_ID_unitig12_25	A0A1L0D2G1_9ASCOCIC11C00000005523 OS=	1197	20	0	60.8	1	F:GO:0003674	F:molecular_function	Coil (COILS); Coil (COILS); Coil (COILS); Coil (COILS); IPR013136 (PFAM); IPR028941 (PFAM); IPR018501 (PFAM); IPR028942 (PFAM); G3DSA:1.20.5.170 (GENE3D); mobidb-lite (MOBIDB_LITE); mobidb-lite (MOBIDB_LITE); mobidb-lite (MOBIDB_LITE); mobidb-lite (MOBIDB_LITE); mobidb-lite (MOBIDB_LITE); mobidb-lite (MOBIDB_LITE); mobidb-lite (MOBIDB_LITE); PTHR32075 (PANTHER); IPR013136 (PROSITE_PROFILES)	no GO terms	no GO terms
[INTERPRO, BLASTED, MAPPED, ANNOTATED]	gene_ID_unitig12_26	A0A1A0HK00_9ASCO OS=Metschnikowia bicuspidata bicuspidata NRRL YB-4993 GN=METBIDRAFT_77052 PE=3 SV=1	366	20	0	81.05	3	F:GO:0008270; P:GO:0055114; F:GO:0008106	F:zinc ion binding; P:oxidation-reduction process; F:alcohol dehydrogenase (NADP+) activity	EC:1.1.1.2	Alcohol dehydrogenase (NADP(+))	IPR020843 (SMART); G3DSA:3.90.180.10 (GENE3D); IPR013154 (PFAM); G3DSA:3.40.50.20 (GENE3D); IPR013149 (PFAM); PTHR42683 (PANTHER); PTHR42683:SF7 (PANTHER); IPR029752 (PROSITE_PATTERNS); IPR002328 (PROSITE_PATTERNS); cd05283 (CDD); IPR016040 (SUPERFAMILY); IPR011032 (SUPERFAMILY)	F:GO:0008270; F:GO:0016491; P:GO:0055114
[INTERPRO, BLASTED, MAPPED, ANNOTATED]	gene_ID_unitig12_27	A0A1L0D3V6_9ASCOCIC11C00000002765 OS=	323	20	0	82.3	5	P:GO:0034551; F:GO:0043022; P:GO:0070131; C:GO:0032592; C:GO:0005761	P:mitochondrial respiratory chain complex III assembly; F:ribosome binding; P:positive regulation of mitochondrial translation; C:integral component of mitochondrial membrane; C:mitochondrial ribosome	IPR021150 (PFAM); mobidb-lite (MOBIDB_LITE); IPR007129 (PANTHER)	no GO terms	no GO terms
[INTERPRO, BLASTED, MAPPED, ANNOTATED]	gene_ID_unitig12_28	A0A1L0BKE1_9ASCOCIC11C00000000551 OS=	276	20	6.48684e-143	73.8	3	C:GO:0000329; C:GO:0005783; C:GO:0005794	C:fungal-type vacuole membrane; C:endoplasmic reticulum; C:Golgi apparatus	G3DSA:3.40.630.30 (GENE3D); PTHR42791:SF4 (PANTHER); PTHR42791 (PANTHER); IPR016181 (SUPERFAMILY)	no GO terms	no GO terms
[INTERPRO, BLASTED, MAPPED, ANNOTATED]	gene_ID_unitig12_29	A0A1A0HJM4_9ASCOSignal recognition particle subunit SRP72 OS=Metschnikowia bicuspidata bicuspidata NRRL YB-4993 GN=METBIDRAFT_36375 PE=3 SV=1	663	20	0	61.95	2	C:GO:0030529; C:GO:0044444	C:intracellular ribonucleoprotein complex; C:cytoplasmic part	IPR011990 (G3DSA:1.25.40.GENE3D); IPR031545 (PFAM); IPR026270 (PIRSF); IPR011990 (G3DSA:1.25.40.GENE3D); IPR011990 (G3DSA:1.25.40.GENE3D); mobidb-lite (MOBIDB_LITE); mobidb-lite (MOBIDB_LITE); IPR026270 (PANTHER); IPR011990 (SUPERFAMILY)	F:GO:0005515; P:GO:0006614	F:protein binding; P:SRP-dependent cotranslational protein targeting to membrane
[INTERPRO, BLASTED, MAPPED]	gene_ID_unitig12_30	A0A1L0BGX8_9ASCOCIC11C00000001502 OS=	224	20	4.90769e-117	56.95	3	P:GO:0008150; C:GO:0005575; F:GO:0003674	P:biological_process; C:cellular_component; F:molecular_function	mobidb-lite (MOBIDB_LITE)	no GO terms	no GO terms
[INTERPRO, BLASTED, MAPPED, ANNOTATED]	gene_ID_unitig12_31	A0A1A0HK05_9ASCOAminomethyltransferase OS=Metschnikowia bicuspidata bicuspidata NRRL YB-4993 GN=METBIDRAFT_10376 PE=3 SV=1	496	20	0	80.7	7	F:GO:0008483; F:GO:0004375; P:GO:0055114; F:GO:0004047; P:GO:0006546; P:GO:0006730; P:GO:0032259	F:transaminase activity; F:glycine dehydrogenase (decarboxylating) activity; P:oxidation-reduction process; F:aminomethyltransferase activity; P:glycine catabolic process; P:one-carbon metabolic process; P:methylation	EC:2.1.2.10; EC:1.4.4.2	Aminomethyltransferase; Glycine dehydrogenase (aminomethyl-transferring)	G3DSA:3.30.1360.120 (GENE3D); G3DSA:3.30.1360.120 (GENE3D); IPR006222 (PFAM); IPR013977 (PFAM); G3DSA:4.10.1250.10 (GENE3D); IPR006223 (TIGRFAM); PIRSF006487 (PIRSF); IPR013977 (G3DSA:2.40.30.GENE3D); PTHR43757:SF2 (PANTHER); PTHR43757 (PANTHER); IPR029043 (SUPERFAMILY); SSF103025 (SUPERFAMILY); TMhelix (TMHMM); TMhelix (TMHMM)	F:GO:0004047; P:GO:0006546
[INTERPRO, BLASTED, MAPPED, ANNOTATED]	gene_ID_unitig12_32	A0A1L0DE49_9ASCOCIC11C00000000360 OS=	2843	20	0	54.65	5	P:GO:0044260; F:GO:0016740; P:GO:0044238; P:GO:0006796; P:GO:0050896	P:cellular macromolecule metabolic process; F:transferase activity; P:primary metabolic process; P:phosphate-containing compound metabolic process; P:response to stimulus	Coil (COILS); IPR021668 (SMART); IPR003152 (SMART); IPR000403 (SMART); IPR011989 (G3DSA:1.25.10.GENE3D); IPR021668 (PFAM); IPR003152 (PFAM); IPR000403 (PFAM); IPR000403 (G3DSA:1.10.1070.GENE3D); G3DSA:3.30.1010.10 (GENE3D); IPR015519 (PTHR11139:PANTHER); PTHR11139 (PANTHER); IPR018936 (PROSITE_PATTERNS); IPR003152 (PROSITE_PROFILES); IPR014009 (PROSITE_PROFILES); IPR000403 (PROSITE_PROFILES); cd0…	P:GO:0006281; P:GO:0000077; F:GO:0005515; P:GO:0090399; P:GO:0000723; P:GO:0016572; F:GO:0004674; P:GO:0006974; F:GO:0016301; P:GO:0010212	P:DNA repair; P:DNA damage checkpoint; F:protein binding; P:replicative senescence; P:telomere maintenance; P:histone phosphorylation; F:protein serine/threonine kinase activity; P:cellular response to DNA damage stimulus; F:kinase activity; P:response to ionizing radiation
[INTERPRO, BLASTED, MAPPED]	gene_ID_unitig12_33	A0A1L0D3W9_9ASCOCIC11C00000001917 OS=	431	17	1.77661e-107	50	3	F:GO:0003677; P:GO:0006310; P:GO:0006302	F:DNA binding; P:DNA recombination; P:double-strand break repair	Coil (COILS); G3DSA:1.20.5.370 (GENE3D); mobidb-lite (MOBIDB_LITE); mobidb-lite (MOBIDB_LITE)	no GO terms	no GO terms
[INTERPRO, BLASTED, MAPPED, ANNOTATED]	gene_ID_unitig12_34	A0A1L0DG61_9ASCOCIC11C00000004395 OS=	596	20	0	85.15	8	F:GO:0000166; C:GO:0005634; P:GO:0006338; C:GO:0000932; C:GO:0005829; F:GO:0008266; P:GO:0000398; P:GO:1902625	F:nucleotide binding; C:nucleus; P:chromatin remodeling; C:P-body; C:cytosol; F:poly(U) RNA binding; P:mRNA splicing, via spliceosome; P:negative regulation of induction of conjugation with cellular fusion by negative regulation of transcription from RNA polymerase II promoter	IPR000504 (SMART); G3DSA:3.30.70.330 (GENE3D); G3DSA:3.30.70.330 (GENE3D); G3DSA:3.30.70.330 (GENE3D); G3DSA:3.30.70.330 (GENE3D); IPR000504 (PFAM); mobidb-lite (MOBIDB_LITE); mobidb-lite (MOBIDB_LITE); PTHR42664 (PANTHER); IPR000504 (PROSITE_PROFILES); IPR000504 (PROSITE_PROFILES); IPR000504 (PROSITE_PROFILES); IPR000504 (PROSITE_PROFILES); IPR000504 (SUPERFAMILY); IPR000504 (SUPERFAMILY)	F:GO:0003676	F:nucleic acid binding
[INTERPRO, BLASTED, MAPPED]	gene_ID_unitig12_35	A0A1L0D4F3_9ASCOCIC11C00000000690 OS=	253	20	1.35546e-98	61.65	2	C:GO:0016020; C:GO:0016021	C:membrane; C:integral component of membrane	IPR019150 (PFAM); mobidb-lite (MOBIDB_LITE); IPR019150 (PANTHER); PTHR13050:SF8 (PANTHER); TMhelix (TMHMM)	no GO terms	no GO terms
[INTERPRO, BLASTED, MAPPED, ANNOTATED]	gene_ID_unitig12_36	A0A1A0HK94_9ASCOWSC-domain-containing OS=Metschnikowia bicuspidata bicuspidata NRRL YB-4993 GN=METBIDRAFT_77060 PE=4 SV=1	394	20	8.60521e-122	61.25	1	C:GO:0044464	C:cell part	IPR002889 (SMART); IPR002889 (PFAM); G3DSA:1.20.5.100 (GENE3D); mobidb-lite (MOBIDB_LITE); mobidb-lite (MOBIDB_LITE); IPR002889 (PROSITE_PROFILES); cd12087 (CDD); TMhelix (TMHMM)	no GO terms	no GO terms
[INTERPRO, BLASTED, MAPPED, ANNOTATED]	gene_ID_unitig12_37	A0A1A0HJ91_9ASCORibosomal L14b L23e OS=Metschnikowia bicuspidata bicuspidata NRRL YB-4993 GN=METBIDRAFT_65987 PE=3 SV=1	137	20	5.59082e-95	97.15	3	F:GO:0003735; C:GO:0005840; P:GO:0006412	F:structural constituent of ribosome; C:ribosome; P:translation	IPR000218 (SMART); IPR000218 (PFAM); IPR000218 (G3DSA:2.40.150.GENE3D); IPR000218 (PANTHER); PTHR11761:SF18 (PANTHER); IPR019972 (PROSITE_PATTERNS); IPR000218 (HAMAP); IPR000218 (SUPERFAMILY)	F:GO:0003735; C:GO:0005840; P:GO:0006412	F:structural constituent of ribosome; C:ribosome; P:translation
[INTERPRO, BLASTED, MAPPED]	gene_ID_unitig12_38	A0A1L0BHT9_9ASCOCIC11C00000002802 OS=	818	20	0	65.25	5	F:GO:0005546; C:GO:0031932; P:GO:0038203; P:GO:0016197; P:GO:0030036	F:phosphatidylinositol-4,5-bisphosphate binding; C:TORC2 complex; P:TORC2 signaling; P:endosomal transport; P:actin cytoskeleton organization	Coil (COILS); IPR001849 (SMART); IPR001849 (PFAM); IPR011993 (G3DSA:2.30.29.GENE3D); G3DSA:1.20.1460.10 (GENE3D); mobidb-lite (MOBIDB_LITE); mobidb-lite (MOBIDB_LITE); mobidb-lite (MOBIDB_LITE); mobidb-lite (MOBIDB_LITE); IPR033191 (PTHR31941:PANTHER); PTHR31941 (PANTHER); IPR001849 (PROSITE_PROFILES); cd13311 (CDD); IPR011993 (SUPERFAMILY)	F:GO:0005546; C:GO:0031932; P:GO:0038203; P:GO:0016197; P:GO:0030036	F:phosphatidylinositol-4,5-bisphosphate binding; C:TORC2 complex; P:TORC2 signaling; P:endosomal transport; P:actin cytoskeleton organization
[INTERPRO, BLASTED, MAPPED, ANNOTATED]	gene_ID_unitig12_39	A0A1L0G1Z8_9ASCOCIC11C00000000711 OS=	172	20	1.57992e-76	74.3	10	F:GO:0008270; F:GO:0061630; P:GO:0043161; P:GO:0016925; F:GO:0032184; P:GO:0000723; P:GO:0033234; C:GO:0033768; P:GO:0006974; P:GO:0016567	F:zinc ion binding; F:ubiquitin protein ligase activity; P:proteasome-mediated ubiquitin-dependent protein catabolic process; P:protein sumoylation; F:SUMO polymer binding; P:telomere maintenance; P:negative regulation of protein sumoylation; C:SUMO-targeted ubiquitin ligase complex; P:cellular response to DNA damage stimulus; P:protein ubiquitination	IPR001841 (SMART); IPR013083 (G3DSA:3.30.40.GENE3D); IPR027370 (PFAM); mobidb-lite (MOBIDB_LITE); PTHR23041 (PANTHER); IPR017907 (PROSITE_PATTERNS); IPR001841 (PROSITE_PROFILES); IPR001841 (CDD); SSF57850 (SUPERFAMILY)	no GO terms	no GO terms
[INTERPRO, BLASTED, MAPPED, ANNOTATED]	gene_ID_unitig12_40	A0A1A0HJ96_9ASCOUPF0005-domain-containing OS=Metschnikowia bicuspidata bicuspidata NRRL YB-4993 GN=METBIDRAFT_37252 PE=3 SV=1	253	20	5.44276e-162	79.55	7	P:GO:0030968; C:GO:0005739; P:GO:0006915; C:GO:0016021; C:GO:0005783; C:GO:0000324; P:GO:0019722	P:endoplasmic reticulum unfolded protein response; C:mitochondrion; P:apoptotic process; C:integral component of membrane; C:endoplasmic reticulum; C:fungal-type vacuole; P:calcium-mediated signaling	IPR006214 (PFAM); PTHR23291:SF58 (PANTHER); IPR006214 (PANTHER); cd10429 (CDD); TMhelix (TMHMM); TMhelix (TMHMM); TMhelix (TMHMM); TMhelix (TMHMM); TMhelix (TMHMM); TMhelix (TMHMM)	no GO terms	no GO terms
[INTERPRO, BLASTED, MAPPED, ANNOTATED]	gene_ID_unitig12_41	A0A1A0HJN5_9ASCO26S proteasome subunit P45 OS=Metschnikowia bicuspidata bicuspidata NRRL YB-4993 GN=METBIDRAFT_30553 PE=3 SV=1	441	20	0	97.1	13	C:GO:0008540; C:GO:0061638; F:GO:0008233; P:GO:1901800; P:GO:0006511; C:GO:0005634; F:GO:0005524; P:GO:0031503; P:GO:0043171; P:GO:0070651; P:GO:0070682; C:GO:0005829; F:GO:0036402	C:proteasome regulatory particle, base subcomplex; C:CENP-A containing chromatin; F:peptidase activity; P:positive regulation of proteasomal protein catabolic process; P:ubiquitin-dependent protein catabolic process; C:nucleus; F:ATP binding; P:protein complex localization; P:peptide catabolic process; P:nonfunctional rRNA decay; P:proteasome regulatory particle assembly; C:cytosol; F:proteasome-…	EC:3.6.1.3; EC:3.6.1.15	Adenosinetriphosphatase; Nucleoside-triphosphate phosphatase	IPR003593 (SMART); G3DSA:1.10.8.60 (GENE3D); IPR003959 (PFAM); IPR005937 (TIGRFAM); G3DSA:3.40.50.300 (GENE3D); mobidb-lite (MOBIDB_LITE); PTHR23073:SF40 (PANTHER); PTHR23073 (PANTHER); IPR003960 (PROSITE_PATTERNS); cd00009 (CDD); IPR027417 (SUPERFAMILY)	F:GO:0005524; C:GO:0005737; P:GO:0030163; F:GO:0016787
[INTERPRO, BLASTED, MAPPED, ANNOTATED]	gene_ID_unitig12_42	A0A1A0HJQ7_9ASCOThioredoxin OS=Metschnikowia bicuspidata bicuspidata NRRL YB-4993 GN=METBIDRAFT_34132 PE=4 SV=1	142	20	3.82901e-74	74.25	6	F:GO:0015035; C:GO:0005739; P:GO:0006662; P:GO:0034599; P:GO:0045454; P:GO:0055114	F:protein disulfide oxidoreductase activity; C:mitochondrion; P:glycerol ether metabolic process; P:cellular response to oxidative stress; P:cell redox homeostasis; P:oxidation-reduction process	PR00421 (PRINTS); IPR005746 (TIGRFAM); G3DSA:3.40.30.10 (GENE3D); IPR005746 (PIRSF); IPR013766 (PFAM); IPR005746 (PANTHER); PTHR10438:SF344 (PANTHER); IPR017937 (PROSITE_PATTERNS); IPR013766 (PROSITE_PROFILES); cd02947 (CDD); IPR012336 (SUPERFAMILY)	F:GO:0015035; P:GO:0006662; P:GO:0045454	F:protein disulfide oxidoreductase activity; P:glycerol ether metabolic process; P:cell redox homeostasis
[INTERPRO, BLASTED, MAPPED, ANNOTATED]	gene_ID_unitig12_43	A0A1A0HK20_9ASCOARM repeat-containing OS=Metschnikowia bicuspidata bicuspidata NRRL YB-4993 GN=METBIDRAFT_77067 PE=4 SV=1	706	20	0	81.3	9	C:GO:0005634; F:GO:0005086; P:GO:0042273; F:GO:0000900; P:GO:0032012; C:GO:0015934; P:GO:0017148; P:GO:0043547; F:GO:0003730	C:nucleus; F:ARF guanyl-nucleotide exchange factor activity; P:ribosomal large subunit bio_	genesis; F:translation repressor activity, nucleic acid binding; P:regulation of ARF protein signal transduction; C:large ribosomal subunit; P:negative regulation of translation; P:positive regulation of GTPase activity; F:mRNA 3'-UTR binding	IPR001313 (SMART); IPR011989 (G3DSA:1.25.10.GENE3D); IPR012959 (PFAM); mobidb-lite (MOBIDB_LITE); PTHR13389 (PANTHER); IPR033133 (PROSITE_PROFILES); IPR001313 (PROSITE_PROFILES); IPR001313 (PROSITE_PROFILES); IPR001313 (PROSITE_PROFILES); IPR001313 (PROSITE_PROFILES); IPR001313 (PROSITE_PROFILES); IPR016024 (SUPERFAMILY)	F:GO:0003723; F:GO:0005488	F:RNA binding; F:binding
[INTERPRO, BLASTED, MAPPED, ANNOTATED]	gene_ID_unitig12_44	A0A1L0BH20_9ASCOCIC11C00000004825 OS=	196	20	5.13034e-100	75.1	4	F:GO:0009055; C:GO:0016020; F:GO:0008137; P:GO:0055114	F:electron carrier activity; C:membrane; F:NADH dehydrogenase (ubiquinone) activity; P:oxidation-reduction process	EC:1.6.99.5; EC:1.6.99.3; EC:1.6.5.3	Acting on NADH or NADPH; NADH dehydrogenase; NADH:ubiquinone reductase (H(+)-translocating)	Coil (COILS); IPR007763 (PFAM); mobidb-lite (MOBIDB_LITE); PTHR32470:SF3 (PANTHER); PTHR32470 (PANTHER)	F:GO:0009055; C:GO:0016020; F:GO:0008137
[INTERPRO, BLASTED, MAPPED, ANNOTATED]	gene_ID_unitig12_45	A0A1L0DLT6_9ASCOAlpha-mannosidase OS=	1179	20	0	77.7	7	F:GO:0008270; C:GO:0000329; F:GO:0004571; P:GO:0006013; C:GO:0005829; P:GO:0009313; F:GO:0030246	F:zinc ion binding; C:fungal-type vacuole membrane; F:mannosyl-oligosaccharide 1,2-alpha-mannosidase activity; P:mannose metabolic process; C:cytosol; P:oligosaccharide catabolic process; F:carbohydrate binding	EC:3.2.1.113; EC:3.2.1.24	Mannosyl-oligosaccharide 1,2-alpha-mannosidase; Alpha-mannosidase	IPR015341 (SMART); IPR010259 (G3DSA:3.30.70.GENE3D); IPR015341 (G3DSA:1.20.1270.GENE3D); IPR015341 (PFAM); IPR010259 (PFAM); IPR000602 (PFAM); IPR027291 (G3DSA:3.20.110.GENE3D); IPR011682 (PFAM); PTHR11607:SF49 (PANTHER); PTHR11607 (PANTHER); IPR009020 (SUPERFAMILY); IPR011330 (SUPERFAMILY); IPR011013 (SUPERFAMILY); IPR028995 (SUPERFAMILY)	P:GO:0005975; F:GO:0004559; F:GO:0003824; P:GO:0006013; F:GO:0030246
[INTERPRO, BLASTED, MAPPED, ANNOTATED]	gene_ID_unitig12_46	A0A1A0HJR0_9ASCOShwachman-Bodian-diamond syndrome OS=Metschnikowia bicuspidata bicuspidata NRRL YB-4993 GN=METBIDRAFT_36439 PE=4 SV=1	253	20	4.68769e-173	86.55	5	F:GO:0005085; C:GO:0005829; P:GO:0042256; C:GO:0005730; P:GO:0043547	F:guanyl-nucleotide exchange factor activity; C:cytosol; P:mature ribosome assembly; C:nucleolus; P:positive regulation of GTPase activity	IPR002140 (TIGRFAM); IPR019783 (PFAM); IPR019783 (G3DSA:3.30.1250.GENE3D); IPR018978 (PFAM); G3DSA:3.30.70.240 (GENE3D); PTHR10927 (PANTHER); IPR018023 (PROSITE_PATTERNS); SSF109728 (SUPERFAMILY); IPR019783 (SUPERFAMILY)	P:GO:0042254; P:GO:0042256	P:ribosome bio_	genesis; P:mature ribosome assembly
[INTERPRO, BLASTED, MAPPED, ANNOTATED]	gene_ID_unitig12_47	A0A1A0HK25_9ASCONucleotide-diphospho-sugar transferase OS=Metschnikowia bicuspidata bicuspidata NRRL YB-4993 GN=METBIDRAFT_10393 PE=4 SV=1	714	20	0	78.75	9	F:GO:0003743; F:GO:0016779; F:GO:0005085; C:GO:0005829; C:GO:0032045; C:GO:0005851; P:GO:0006413; P:GO:0006446; P:GO:0043547	F:translation initiation factor activity; F:nucleotidyltransferase activity; F:guanyl-nucleotide exchange factor activity; C:cytosol; C:guanyl-nucleotide exchange factor complex; C:eukaryotic translation initiation factor 2B complex; P:translational initiation; P:regulation of translational initiation; P:positive regulation of GTPase activity	IPR003307 (SMART); IPR001451 (PFAM); IPR003307 (PFAM); IPR005835 (PFAM); G3DSA:1.25.40.180 (GENE3D); G3DSA:2.160.10.10 (GENE3D); IPR029044 (G3DSA:3.90.550.GENE3D); PTHR22572 (PANTHER); PTHR22572:SF134 (PANTHER); IPR003307 (PROSITE_PROFILES); cd11558 (CDD); cd05787 (CDD); cd04197 (CDD); IPR011004 (SUPERFAMILY); IPR016024 (SUPERFAMILY); IPR029044 (SUPERFAMILY)	F:GO:0016779; F:GO:0005515; P:GO:0009058; F:GO:0005488	F:nucleotidyltransferase activity; F:protein binding; P:biosynthetic process; F:binding
[INTERPRO, BLASTED, MAPPED, ANNOTATED]	gene_ID_unitig12_48	A0A1A0HKA8_9ASCOSqualene monooxygenase OS=Metschnikowia bicuspidata bicuspidata NRRL YB-4993 GN=METBIDRAFT_121010 PE=4 SV=1	489	20	0	78.4	17	F:GO:0008144; P:GO:0035690; P:GO:0036187; P:GO:0036180; P:GO:0006696; P:GO:0036170; C:GO:0005783; P:GO:0036171; C:GO:0044422; P:GO:0009267; C:GO:0005886; C:GO:0005811; F:GO:0004506; F:GO:0050660; C:GO:0016021; P:GO:0055114; P:GO:0051668	F:drug binding; P:cellular response to drug; P:cell growth mode switching, budding to filamentous; P:filamentous growth of a population of unicellular organisms in response to biotic stimulus; P:ergosterol biosynthetic process; P:filamentous growth of a population of unicellular organisms in response to starvation; C:endoplasmic reticulum; P:filamentous growth of a population of unicellular organ…	EC:1.14.13.132; EC:1.14.13	Acting on paired donors, with incorporation or reduction of molecular oxygen. The oxygen incorporated need not be derived from O(2); Acting on paired donors, with incorporation or reduction of molecular oxygen. The oxygen incorporated need not be derived from O(2)	PR00420 (PRINTS); IPR013698 (PFAM); IPR023753 (G3DSA:3.50.50.GENE3D); PTHR10835 (PANTHER); PTHR10835:SF3 (PANTHER); IPR023753 (SUPERFAMILY); TMhelix (TMHMM); TMhelix (TMHMM)	F:GO:0004506; F:GO:0050660; F:GO:0016491; C:GO:0016021; P:GO:0055114
[INTERPRO, BLASTED, MAPPED, ANNOTATED]	gene_ID_unitig12_49	A0A1A0HJA5_9ASCOCalcium proton exchanger OS=Metschnikowia bicuspidata bicuspidata NRRL YB-4993 GN=METBIDRAFT_77073 PE=3 SV=1	411	20	0	85.85	8	P:GO:0071805; F:GO:0015386; C:GO:0000329; C:GO:0016021; P:GO:0070588; C:GO:0005783; F:GO:0015369; P:GO:0006874	P:potassium ion transmembrane transport; F:potassium:proton antiporter activity; C:fungal-type vacuole membrane; C:integral component of membrane; P:calcium ion transmembrane transport; C:endoplasmic reticulum; F:calcium:proton antiporter activity; P:cellular calcium ion homeostasis	IPR004837 (PFAM); IPR004798 (TIGRFAM); IPR004713 (TIGRFAM); PTHR31503 (PANTHER); IPR030177 (PTHR31503:PANTHER); TMhelix (TMHMM); TMhelix (TMHMM); TMhelix (TMHMM); TMhelix (TMHMM); TMhelix (TMHMM); TMhelix (TMHMM); TMhelix (TMHMM); TMhelix (TMHMM); TMhelix (TMHMM); TMhelix (TMHMM); TMhelix (TMHMM)	P:GO:0055085; P:GO:0006812; F:GO:0015386; P:GO:0006816; C:GO:0016021; F:GO:0008324; F:GO:0015085; F:GO:0015369	P:transmembrane transport; P:cation transport; F:potassium:proton antiporter activity; P:calcium ion transport; C:integral component of membrane; F:cation transmembrane transporter activity; F:calcium ion transmembrane transporter activity; F:calcium:proton antiporter activity
[INTERPRO, BLASTED, MAPPED, ANNOTATED]	gene_ID_unitig12_50	A0A1A0HJP6_9ASCOCyclin OS=Metschnikowia bicuspidata bicuspidata NRRL YB-4993 GN=METBIDRAFT_120981 PE=4 SV=1	277	20	1.34917e-127	75.65	2	F:GO:0019901; P:GO:0000079	F:protein kinase binding; P:regulation of cyclin-dependent protein serine/threonine kinase activity	IPR013763 (G3DSA:1.10.472.GENE3D); IPR012104 (PIRSF); IPR006671 (PFAM); mobidb-lite (MOBIDB_LITE); PTHR15615 (PANTHER); PTHR15615:SF47 (PANTHER); IPR013763 (SUPERFAMILY)	F:GO:0019901; P:GO:0051726; P:GO:0000079	F:protein kinase binding; P:regulation of cell cycle; P:regulation of cyclin-dependent protein serine/threonine kinase activity
[INTERPRO, BLASTED, MAPPED, ANNOTATED]	gene_ID_unitig12_51	A0A1A0HJR6_9ASCOT-complex 1 OS=Metschnikowia bicuspidata bicuspidata NRRL YB-4993 GN=METBIDRAFT_77076 PE=3 SV=1	554	20	0	93.7	5	C:GO:0005634; C:GO:0005832; F:GO:0005524; F:GO:0051082; P:GO:0006457	C:nucleus; C:chaperonin-containing T-complex; F:ATP binding; F:unfolded protein binding; P:protein folding	IPR017998 (PRINTS); IPR012715 (TIGRFAM); IPR027409 (G3DSA:3.50.7.GENE3D); IPR002423 (PFAM); IPR027413 (G3DSA:1.10.560.GENE3D); IPR027413 (G3DSA:1.10.560.GENE3D); PTHR11353 (PANTHER); IPR012715 (PTHR11353:PANTHER); IPR002194 (PROSITE_PATTERNS); IPR002194 (PROSITE_PATTERNS); IPR002194 (PROSITE_PATTERNS); IPR012715 (CDD); IPR027409 (SUPERFAMILY); SSF48592 (SUPERFAMILY); SSF54849 (SUPERFAMILY)	F:GO:0005524; F:GO:0051082; P:GO:0006457	F:ATP binding; F:unfolded protein binding; P:protein folding
[INTERPRO, BLASTED, MAPPED, ANNOTATED]	gene_ID_unitig12_52	A0A1L0BEX8_9ASCO3-oxoacyl-[acyl-carrier- ] synthase OS=	435	20	0	80.5	3	F:GO:0016747; C:GO:0005739; P:GO:0006633	F:transferase activity, transferring acyl groups other than amino-acyl groups; C:mitochondrion; P:fatty acid biosynthetic process	IPR020841 (SMART); IPR017568 (TIGRFAM); IPR016039 (G3DSA:3.40.47.GENE3D); IPR016039 (G3DSA:3.40.47.GENE3D); IPR014031 (PFAM); IPR017568 (PIRSF); IPR014030 (PFAM); PTHR11712 (PANTHER); PTHR11712:SF313 (PANTHER); IPR018201 (PROSITE_PATTERNS); cd00834 (CDD); IPR016039 (SUPERFAMILY); IPR016039 (SUPERFAMILY)	F:GO:0016747; F:GO:0003824; P:GO:0008152; P:GO:0006633	F:transferase activity, transferring acyl groups other than amino-acyl groups; F:catalytic activity; P:metabolic process; P:fatty acid biosynthetic process
[INTERPRO, BLASTED, MAPPED, ANNOTATED]	gene_ID_unitig12_53	A0A1A0HJS0_9ASCOBeta-glucan synthesis-associated OS=Metschnikowia bicuspidata bicuspidata NRRL YB-4993 GN=METBIDRAFT_121488 PE=4 SV=1	1308	20	0	76.6	3	P:GO:0005975; C:GO:0016021; F:GO:0004553	P:carbohydrate metabolic process; C:integral component of membrane; F:hydrolase activity, hydrolyzing O-glycosyl compounds	G3DSA:2.60.120.200 (GENE3D); IPR005629 (PFAM); mobidb-lite (MOBIDB_LITE); mobidb-lite (MOBIDB_LITE); mobidb-lite (MOBIDB_LITE); PTHR31361:SF13 (PANTHER); PTHR31361 (PANTHER); IPR000757 (PROSITE_PROFILES); IPR000757 (PROSITE_PROFILES); cd02180 (CDD); cd02180 (CDD); IPR013320 (SUPERFAMILY); IPR013320 (SUPERFAMILY); TMhelix (TMHMM); TMhelix (TMHMM); TMhelix (TMHMM)	P:GO:0005975; F:GO:0004553	P:carbohydrate metabolic process; F:hydrolase activity, hydrolyzing O-glycosyl compounds
[INTERPRO, BLASTED, MAPPED, ANNOTATED]	gene_ID_unitig12_54	A0A1A0HK34_9ASCOAutophagy-related 9 OS=Metschnikowia bicuspidata bicuspidata NRRL YB-4993 GN=METBIDRAFT_77080 PE=3 SV=1	919	20	0	69.9	10	C:GO:0000407; C:GO:0098588; P:GO:0006914; C:GO:0016021; C:GO:0031410; C:GO:0005783; C:GO:0005794; C:GO:0044446; C:GO:0098805; P:GO:0032258	C:pre-autophagosomal structure; C:bounding membrane of organelle; P:autophagy; C:integral component of membrane; C:cytoplasmic vesicle; C:endoplasmic reticulum; C:Golgi apparatus; C:intracellular organelle part; C:whole membrane; P:CVT pathway	IPR007241 (PFAM); mobidb-lite (MOBIDB_LITE); mobidb-lite (MOBIDB_LITE); mobidb-lite (MOBIDB_LITE); mobidb-lite (MOBIDB_LITE); PTHR13038:SF19 (PANTHER); IPR007241 (PANTHER); TMhelix (TMHMM); TMhelix (TMHMM); TMhelix (TMHMM); TMhelix (TMHMM); TMhelix (TMHMM)	no GO terms	no GO terms
[INTERPRO, BLASTED, MAPPED, ANNOTATED]	gene_ID_unitig12_55	A0A1A0HKB9_9ASCONop14 OS=Metschnikowia bicuspidata bicuspidata NRRL YB-4993 GN=METBIDRAFT_36587 PE=4 SV=1	809	20	0	69.5	6	P:GO:0000462; F:GO:0030515; P:GO:0035690; P:GO:0000479; C:GO:0005730; C:GO:0030686	P:maturation of SSU-rRNA from tricistronic rRNA transcript (SSU-rRNA, 5.8S rRNA, LSU-rRNA); F:snoRNA binding; P:cellular response to drug; P:endonucleolytic cleavage of tricistronic rRNA transcript (SSU-rRNA, 5.8S rRNA, LSU-rRNA); C:nucleolus; C:90S preribosome	Coil (COILS); Coil (COILS); Coil (COILS); IPR007276 (PFAM); mobidb-lite (MOBIDB_LITE); mobidb-lite (MOBIDB_LITE); mobidb-lite (MOBIDB_LITE); PTHR23183:SF1 (PANTHER); IPR007276 (PANTHER)	C:GO:0032040	C:small-subunit processome
[INTERPRO, BLASTED, MAPPED, ANNOTATED]	gene_ID_unitig14_1	A0A1L0G5F2_9ASCOCIC11C00000002711 OS=	387	20	8.3075e-99	77.55	8	C:GO:0035838; P:GO:0090002; C:GO:0016021; P:GO:0070941; C:GO:0000502; C:GO:0005794; C:GO:0005886; C:GO:0032126	C:growing cell tip; P:establishment of protein localization to plasma membrane; C:integral component of membrane; P:eisosome assembly; C:proteasome complex; C:Golgi apparatus; C:plasma membrane; C:eisosome	IPR002110 (SMART); IPR020683 (G3DSA:1.25.40.GENE3D); IPR020683 (G3DSA:1.25.40.GENE3D); IPR020683 (G3DSA:1.25.40.GENE3D); IPR008253 (PFAM); IPR020683 (PFAM); PF13637 (PFAM); PTHR28165 (PANTHER); PTHR28165:SF3 (PANTHER); IPR020683 (PROSITE_PROFILES); IPR002110 (PROSITE_PROFILES); IPR002110 (PROSITE_PROFILES); IPR002110 (PROSITE_PROFILES); cd00204 (CDD); cd00204 (CDD); IPR020683 (SUPERFAMILY); TMhel…	F:GO:0005515; C:GO:0016020	F:protein binding; C:membrane
[INTERPRO, BLASTED, MAPPED, ANNOTATED]	gene_ID_unitig14_2	A0A1L0G0E6_9ASCOCIC11C00000001801 OS=	733	20	0	76.95	11	C:GO:0005887; F:GO:0022891; P:GO:0009749; P:GO:0036168; P:GO:0034605; P:GO:0055085; P:GO:0007165; P:GO:0019660; P:GO:0008643; F:GO:0004872; P:GO:0009405	C:integral component of plasma membrane; F:substrate-specific transmembrane transporter activity; P:response to glucose; P:filamentous growth of a population of unicellular organisms in response to heat; P:cellular response to heat; P:transmembrane transport; P:signal transduction; P:glycolytic fermentation; P:carbohydrate transport; F:receptor activity; P:patho_	genesis	IPR003663 (PRINTS); G3DSA:1.20.1250.20 (GENE3D); IPR003663 (TIGRFAM); IPR005828 (PFAM); G3DSA:1.20.1250.20 (GENE3D); mobidb-lite (MOBIDB_LITE); mobidb-lite (MOBIDB_LITE); mobidb-lite (MOBIDB_LITE); PTHR23500:SF199 (PANTHER); PTHR23500 (PANTHER); IPR005829 (PROSITE_PATTERNS); IPR005829 (PROSITE_PATTERNS); IPR020846 (PROSITE_PROFILES); IPR020846 (CDD); IPR020846 (SUPERFAMILY); TMhelix (TMHMM); TMhe…	F:GO:0022891; P:GO:0055085; F:GO:0022857; C:GO:0016020; C:GO:0016021; F:GO:0005215	F:substrate-specific transmembrane transporter activity; P:transmembrane transport; F:transmembrane transporter activity; C:membrane; C:integral component of membrane; F:transporter activity
[INTERPRO, BLASTED, MAPPED, ANNOTATED]	gene_ID_unitig14_3	A0A1A0HK39_9ASCOUndecaprenyl diphosphate synthase OS=Metschnikowia bicuspidata bicuspidata NRRL YB-4993 GN=METBIDRAFT_35011 PE=4 SV=1	278	20	1.89723e-164	79.25	7	C:GO:0005635; C:GO:0005811; P:GO:0019408; C:GO:0016021; P:GO:0006486; C:GO:0005783; F:GO:0045547	C:nuclear envelope; C:lipid particle; P:dolichol biosynthetic process; C:integral component of membrane; P:protein glycosylation; C:endoplasmic reticulum; F:dehydrodolichyl diphosphate synthase activity	IPR001441 (G3DSA:3.40.1180.GENE3D); PTHR21528 (PANTHER); IPR001441 (SUPERFAMILY); TMhelix (TMHMM)	F:GO:0016765	F:transferase activity, transferring alkyl or aryl (other than methyl) groups
[INTERPRO, BLASTED, MAPPED, ANNOTATED]	gene_ID_unitig14_4	A0A1A0HKC3_9ASCOARF SAR superfamily OS=Metschnikowia bicuspidata bicuspidata NRRL YB-4993 GN=METBIDRAFT_10407 PE=3 SV=1	181	20	4.37858e-131	96.95	4	F:GO:0005525; P:GO:0007264; P:GO:0035690; C:GO:0005622	F:GTP binding; P:small GTPase mediated signal transduction; P:cellular response to drug; C:intracellular	Coil (COILS); IPR006689 (PRINTS); SM00178 (SMART); SM00175 (SMART); SM00177 (SMART); IPR005225 (TIGRFAM); IPR006689 (PFAM); G3DSA:3.40.50.300 (GENE3D); PTHR11711:SF220 (PANTHER); PTHR11711 (PANTHER); IPR024156 (PROSITE_PROFILES); cd04150 (CDD); IPR027417 (SUPERFAMILY)	F:GO:0005525; P:GO:0007264; C:GO:0005622	F:GTP binding; P:small GTPase mediated signal transduction; C:intracellular
[INTERPRO, BLASTED, MAPPED, ANNOTATED]	gene_ID_unitig14_5	A0A1L0DDP5_9ASCOCIC11C00000000359 OS=	119	20	9.73701e-73	85.8	6	P:GO:0000463; F:GO:0003735; F:GO:0003729; C:GO:0022625; C:GO:0005730; P:GO:0006412	P:maturation of LSU-rRNA from tricistronic rRNA transcript (SSU-rRNA, 5.8S rRNA, LSU-rRNA); F:structural constituent of ribosome; F:mRNA binding; C:cytosolic large ribosomal subunit; C:nucleolus; P:translation	Coil (COILS); IPR001854 (TIGRFAM); G3DSA:1.10.287.310 (GENE3D); IPR001854 (PFAM); PTHR13872 (PANTHER); PTHR13872:SF34 (PANTHER); IPR001854 (HAMAP); IPR001854 (CDD); IPR001854 (SUPERFAMILY)	F:GO:0003735; C:GO:0005840; C:GO:0005622; P:GO:0006412	F:structural constituent of ribosome; C:ribosome; C:intracellular; P:translation
[INTERPRO, BLASTED, MAPPED, ANNOTATED]	gene_ID_unitig14_6	A0A1L0GEG6_9ASCOCIC11C00000003163 OS=	1031	20	0	70.4	7	P:GO:0071361; C:GO:0005634; C:GO:0000151; C:GO:0005737; F:GO:0034450; P:GO:0030433; P:GO:0016567	P:cellular response to ethanol; C:nucleus; C:ubiquitin ligase complex; C:cytoplasm; F:ubiquitin-ubiquitin ligase activity; P:ER-associated ubiquitin-dependent protein catabolic process; P:protein ubiquitination	Coil (COILS); IPR003613 (SMART); IPR003613 (PFAM); IPR019474 (PFAM); mobidb-lite (MOBIDB_LITE); PTHR13931 (PANTHER); PTHR13931:SF16 (PANTHER); IPR003613 (PROSITE_PROFILES); SSF57850 (SUPERFAMILY)	F:GO:0004842; C:GO:0000151; F:GO:0034450; P:GO:0016567; P:GO:0006511	F:ubiquitin-protein transferase activity; C:ubiquitin ligase complex; F:ubiquitin-ubiquitin ligase activity; P:protein ubiquitination; P:ubiquitin-dependent protein catabolic process
[INTERPRO, BLASTED, MAPPED, ANNOTATED]	gene_ID_unitig14_7	A0A1A0HJT1_9ASCOE set domain-containing OS=Metschnikowia bicuspidata bicuspidata NRRL YB-4993 GN=METBIDRAFT_35934 PE=4 SV=1	198	20	1.03355e-129	85	13	F:GO:0005094; P:GO:0007264; P:GO:0036180; P:GO:0007015; P:GO:0036170; P:GO:0009267; P:GO:0030448; C:GO:0005634; C:GO:0005934; P:GO:0032889; C:GO:0005935; P:GO:0050790; C:GO:0005829	F:Rho GDP-dissociation inhibitor activity; P:small GTPase mediated signal transduction; P:filamentous growth of a population of unicellular organisms in response to biotic stimulus; P:actin filament organization; P:filamentous growth of a population of unicellular organisms in response to starvation; P:cellular response to starvation; P:hyphal growth; C:nucleus; C:cellular bud tip; P:regulation o…	IPR024792 (G3DSA:2.70.50.GENE3D); IPR000406 (PFAM); IPR000406 (PANTHER); PTHR10980:SF22 (PANTHER); IPR014756 (SUPERFAMILY)	F:GO:0005094; C:GO:0005737	F:Rho GDP-dissociation inhibitor activity; C:cytoplasm
[INTERPRO, BLASTED, MAPPED, ANNOTATED]	gene_ID_unitig14_8	A0A1A0HK43_9ASCO -helicase-domain-containing OS=Metschnikowia bicuspidata bicuspidata NRRL YB-4993 GN=METBIDRAFT_10411 PE=4 SV=1	878	20	0	64.1	2	F:GO:0004386; P:GO:0009987	F:helicase activity; P:cellular process	EC:3.6.1.15	Nucleoside-triphosphate phosphatase	IPR014017 (PFAM); IPR034739 (PFAM); G3DSA:3.40.50.300 (GENE3D); G3DSA:3.40.50.300 (GENE3D); G3DSA:3.40.50.300 (GENE3D); mobidb-lite (MOBIDB_LITE); IPR000212 (PANTHER); PTHR11070:SF39 (PANTHER); IPR014017 (PROSITE_PROFILES); IPR014016 (PROSITE_PROFILES); cd00046 (CDD); IPR027417 (SUPERFAMILY)	F:GO:0005524; F:GO:0003677; F:GO:0004003; F:GO:0016787
[INTERPRO, BLASTED, MAPPED]	gene_ID_unitig14_9	A0A1L0D5S0_9ASCOCIC11C00000001929 OS=	583	20	0	54.95	5	P:GO:0008150; C:GO:0016020; C:GO:0016021; C:GO:0005575; F:GO:0003674	P:biological_process; C:membrane; C:integral component of membrane; C:cellular_component; F:molecular_function	PTHR35518 (PANTHER); PTHR35518:SF4 (PANTHER); TMhelix (TMHMM)	no GO terms	no GO terms
[INTERPRO, BLASTED, MAPPED, ANNOTATED]	gene_ID_unitig14_10	A0A1L0G5L3_9ASCOCIC11C00000001045 OS=	302	20	0	91.65	2	C:GO:0016021; C:GO:0005886	C:integral component of membrane; C:plasma membrane	IPR000163 (PRINTS); IPR001107 (SMART); IPR001107 (PFAM); IPR000163 (PANTHER); IPR000163 (CDD); IPR001107 (SUPERFAMILY); TMhelix (TMHMM)	C:GO:0016020	C:membrane
[INTERPRO, NO-BLAST]	gene_ID_unitig14_11	---NA---	1091	G3DSA:2.60.120.380 (GENE3D); mobidb-lite (MOBIDB_LITE); mobidb-lite (MOBIDB_LITE); mobidb-lite (MOBIDB_LITE); mobidb-lite (MOBIDB_LITE); mobidb-lite (MOBIDB_LITE)	no GO terms	no GO terms
[INTERPRO, BLASTED, MAPPED]	gene_ID_unitig14_12	A0A1A0HJR5_9ASCOSH3-domain-containing OS=Metschnikowia bicuspidata bicuspidata NRRL YB-4993 GN=METBIDRAFT_36423 PE=4 SV=1	296	20	2.26955e-112	59.55	2	C:GO:0005737; F:GO:0003674	C:cytoplasm; F:molecular_function	IPR001452 (PRINTS); IPR001452 (SMART); IPR011511 (PFAM); G3DSA:2.30.30.40 (GENE3D); G3DSA:2.30.30.40 (GENE3D); mobidb-lite (MOBIDB_LITE); mobidb-lite (MOBIDB_LITE); PTHR11216 (PANTHER); PTHR11216:SF93 (PANTHER); IPR001452 (PROSITE_PROFILES); cd00174 (CDD); IPR001452 (SUPERFAMILY)	F:GO:0005515	F:protein binding
[INTERPRO, BLASTED, MAPPED, ANNOTATED]	gene_ID_unitig14_13	A0A1A0HJT6_9ASCOAcetolactate synthase small subunit mitochondrial OS=Metschnikowia bicuspidata bicuspidata NRRL YB-4993 GN=METBIDRAFT_77094 PE=4 SV=1	297	20	0	89.3	7	F:GO:0003984; C:GO:0005948; P:GO:0050790; F:GO:0016597; P:GO:0009082; F:GO:0030234; C:GO:0042645	F:acetolactate synthase activity; C:acetolactate synthase complex; P:regulation of catalytic activity; F:amino acid binding; P:branched-chain amino acid biosynthetic process; F:enzyme regulator activity; C:mitochondrial nucleoid	EC:2.2.1.6	Acetolactate synthase	IPR004789 (TIGRFAM); IPR002912 (PFAM); IPR019455 (PFAM); G3DSA:3.30.70.1150 (GENE3D); G3DSA:3.30.70.260 (GENE3D); mobidb-lite (MOBIDB_LITE); PTHR31242 (PANTHER); PTHR31242:SF3 (PANTHER); PD002844 (PRODOM); IPR002912 (PROSITE_PROFILES); cd04878 (CDD); SSF55021 (SUPERFAMILY); SSF55021 (SUPERFAMILY)	F:GO:0003984; P:GO:0009082
[INTERPRO, BLASTED, MAPPED]	gene_ID_unitig14_14	A0A1L0BU27_9ASCOCIC11C00000001517 OS=	1014	20	0	54.55	7	F:GO:0003677; C:GO:0005634; F:GO:0008270; F:GO:0046872; P:GO:0006355; F:GO:0000981; P:GO:0006357	F:DNA binding; C:nucleus; F:zinc ion binding; F:metal ion binding; P:regulation of transcription, DNA-templated; F:RNA polymerase II transcription factor activity, sequence-specific DNA binding; P:regulation of transcription from RNA polymerase II promoter	IPR001138 (SMART); IPR001138 (PFAM); IPR001138 (G3DSA:4.10.240.GENE3D); mobidb-lite (MOBIDB_LITE); mobidb-lite (MOBIDB_LITE); PTHR31944:SF105 (PANTHER); PTHR31944 (PANTHER); IPR001138 (PROSITE_PATTERNS); IPR001138 (PROSITE_PROFILES); cd12148 (CDD); IPR001138 (CDD); IPR001138 (SUPERFAMILY); TMhelix (TMHMM)	C:GO:0005634; F:GO:0008270; P:GO:0006355; F:GO:0000981	C:nucleus; F:zinc ion binding; P:regulation of transcription, DNA-templated; F:RNA polymerase II transcription factor activity, sequence-specific DNA binding
[INTERPRO, BLASTED, MAPPED, ANNOTATED]	gene_ID_unitig14_15	A0A1L0DCX8_9ASCOCIC11C00000002367 OS=	172	20	8.33996e-74	84.85	5	C:GO:0016602; F:GO:0046982; F:GO:0043565; P:GO:0000436; P:GO:0043457	C:CCAAT-binding factor complex; F:protein heterodimerization activity; F:sequence-specific DNA binding; P:carbon catabolite activation of transcription from RNA polymerase II promoter; P:regulation of cellular respiration	PR00615 (PRINTS); IPR003958 (PFAM); G3DSA:1.10.20.10 (GENE3D); mobidb-lite (MOBIDB_LITE); PTHR11064:SF55 (PANTHER); PTHR11064 (PANTHER); IPR018247 (PROSITE_PATTERNS); IPR009072 (SUPERFAMILY)	F:GO:0046982	F:protein heterodimerization activity
[INTERPRO, BLASTED, MAPPED, ANNOTATED]	gene_ID_unitig14_16	A0A1L0DN00_9ASCOCIC11C00000003555 OS=	568	20	0	72.75	4	C:GO:0005933; C:GO:0030427; P:GO:0000902; F:GO:0035091	C:cellular bud; C:site of polarized growth; P:cell morpho_	genesis; F:phosphatidylinositol binding	IPR001452 (PRINTS); IPR001683 (SMART); IPR001452 (SMART); IPR001683 (G3DSA:3.30.1520.GENE3D); IPR001452 (PFAM); G3DSA:2.30.30.40 (GENE3D); IPR001683 (PFAM); G3DSA:3.10.20.90 (GENE3D); G3DSA:2.30.30.40 (GENE3D); mobidb-lite (MOBIDB_LITE); mobidb-lite (MOBIDB_LITE); PTHR15706 (PANTHER); IPR001683 (PROSITE_PROFILES); IPR001452 (PROSITE_PROFILES); IPR001452 (PROSITE_PROFILES); cd11878 (CDD); cd06890 …	F:GO:0005515; F:GO:0035091	F:protein binding; F:phosphatidylinositol binding
[INTERPRO, BLASTED]	gene_ID_unitig14_17	A0A1A0HJU1_9ASCOUncharacterized protein OS=Metschnikowia bicuspidata var. bicuspidata NRRL YB-4993 GN=METBIDRAFT_121629 PE=4 SV=1	1007	1	9.7047e-18	44	mobidb-lite (MOBIDB_LITE); mobidb-lite (MOBIDB_LITE); mobidb-lite (MOBIDB_LITE); mobidb-lite (MOBIDB_LITE); mobidb-lite (MOBIDB_LITE)	no GO terms	no GO terms
[INTERPRO, BLASTED]	gene_ID_unitig14_18	A0A1L0BR94_9ASCOCIC11C00000005011 OS=	220	20	1.74515e-96	71.95	G3DSA:3.40.30.10 (GENE3D); IPR012336 (PFAM); PTHR13887:SF34 (PANTHER); PTHR13887 (PANTHER); IPR012336 (SUPERFAMILY)	no GO terms	no GO terms
[INTERPRO, BLASTED, MAPPED, ANNOTATED]	gene_ID_unitig14_19	A0A1A0HKD9_9ASC -splicing endonuclease subunit Sen2 OS=Metschnikowia bicuspidata bicuspidata NRRL YB-4993 GN=METBIDRAFT_52286 PE=3 SV=1	491	20	0	60.7	5	P:GO:0090305; P:GO:0008033; P:GO:0035690; F:GO:0004518; C:GO:0044424	P:nucleic acid phosphodiester bond hydrolysis; P:tRNA processing; P:cellular response to drug; F:nuclease activity; C:intracellular part	G3DSA:1.10.20.10 (GENE3D); G3DSA:3.40.1350.10 (GENE3D); IPR006677 (PFAM); IPR003958 (PFAM); IPR006676 (TIGRFAM); G3DSA:3.40.1170.20 (GENE3D); mobidb-lite (MOBIDB_LITE); IPR006676 (PANTHER); IPR009072 (SUPERFAMILY); IPR006677 (SUPERFAMILY)	F:GO:0046982; P:GO:0006388; F:GO:0000213	F:protein heterodimerization activity; P:tRNA splicing, via endonucleolytic cleavage and ligation; F:tRNA-intron endonuclease activity
[INTERPRO, BLASTED, MAPPED, ANNOTATED]	gene_ID_unitig14_20	A0A1A0HJS5_9ASCOPentulose kinase OS=Metschnikowia bicuspidata bicuspidata NRRL YB-4993 GN=METBIDRAFT_30590 PE=4 SV=1	1569	20	0	84.8	7	F:GO:0008271; P:GO:0005975; C:GO:0016021; P:GO:1902358; P:GO:0016310; F:GO:0016773; F:GO:0016301	F:secondary active sulfate transmembrane transporter activity; P:carbohydrate metabolic process; C:integral component of membrane; P:sulfate transmembrane transport; P:phosphorylation; F:phosphotransferase activity, alcohol group as acceptor; F:kinase activity	IPR001902 (TIGRFAM); IPR002645 (G3DSA:3.30.750.GENE3D); G3DSA:3.30.420.40 (GENE3D); IPR011547 (PFAM); G3DSA:3.30.420.40 (GENE3D); IPR002645 (PFAM); IPR006003 (TIGRFAM); IPR018484 (PFAM); IPR018485 (PFAM); mobidb-lite (MOBIDB_LITE); mobidb-lite (MOBIDB_LITE); PTHR43435:SF4 (PANTHER); PTHR43435 (PANTHER); IPR018045 (PROSITE_PATTERNS); IPR002645 (PROSITE_PROFILES); IPR006003 (CDD); cd07042 (CDD); SS…	P:GO:0008272; F:GO:0008271; P:GO:0005975; P:GO:0055085; C:GO:0016020; C:GO:0016021; F:GO:0016773; F:GO:0015116	P:sulfate transport; F:secondary active sulfate transmembrane transporter activity; P:carbohydrate metabolic process; P:transmembrane transport; C:membrane; C:integral component of membrane; F:phosphotransferase activity, alcohol group as acceptor; F:sulfate transmembrane transporter activity
[INTERPRO, BLASTED, MAPPED, ANNOTATED]	gene_ID_unitig14_21	A0A1A0HK58_9ASCOEukaryotic initiation factor 4A OS=Metschnikowia bicuspidata bicuspidata NRRL YB-4993 GN=METBIDRAFT_10425 PE=3 SV=1	396	20	0	95.1	5	F:GO:0003743; F:GO:0005524; C:GO:0005737; F:GO:0004386; P:GO:0006413	F:translation initiation factor activity; F:ATP binding; C:cytoplasm; F:helicase activity; P:translational initiation	EC:3.6.1.15	Nucleoside-triphosphate phosphatase	IPR001650 (SMART); IPR014001 (SMART); IPR001650 (PFAM); G3DSA:3.40.50.300 (GENE3D); G3DSA:3.40.50.300 (GENE3D); IPR011545 (PFAM); PTHR24031 (PANTHER); PTHR24031:SF379 (PANTHER); IPR000629 (PROSITE_PATTERNS); IPR014001 (PROSITE_PROFILES); IPR014014 (PROSITE_PROFILES); IPR001650 (PROSITE_PROFILES); cd00268 (CDD); cd00079 (CDD); IPR027417 (SUPERFAMILY)	F:GO:0003676; F:GO:0005524
[INTERPRO, BLASTED, MAPPED]	gene_ID_unitig14_22	A0A1A0HKE4_9ASCONucleotide-diphospho-sugar transferase OS=Metschnikowia bicuspidata bicuspidata NRRL YB-4993 GN=METBIDRAFT_37130 PE=4 SV=1	559	20	0	51.85	3	F:GO:0016757; F:GO:0008466; F:GO:0016740	F:transferase activity, transferring glycosyl groups; F:glycogenin glucosyltransferase activity; F:transferase activity	IPR002495 (PFAM); IPR029044 (G3DSA:3.90.550.GENE3D); mobidb-lite (MOBIDB_LITE); PTHR11183:SF72 (PANTHER); PTHR11183 (PANTHER); IPR029044 (SUPERFAMILY)	F:GO:0016757	F:transferase activity, transferring glycosyl groups
[INTERPRO, BLASTED, MAPPED, ANNOTATED]	gene_ID_unitig14_23	A0A1A0HJT0_9ASCOS-adenosyl-L-methionine-dependent methyltransferase OS=Metschnikowia bicuspidata bicuspidata NRRL YB-4993 GN=METBIDRAFT_77104 PE=3 SV=1	553	20	0	79.2	7	F:GO:0051908; P:GO:0000738; P:GO:0000737; F:GO:0030697; P:GO:0030488; F:GO:0000014; P:GO:0006302	F:double-stranded DNA 5'-3' exodeoxyribonuclease activity; P:DNA catabolic process, exonucleolytic; P:DNA catabolic process, endonucleolytic; F:S-adenosylmethionine-dependent tRNA (m5U54) methyltransferase activity; P:tRNA methylation; F:single-stranded DNA endodeoxyribonuclease activity; P:double-strand break repair	EC:2.1.1.35; EC:3.1.11; EC:3.1.15	tRNA (uracil(54)-C(5))-methyltransferase; Acting on ester bonds; Acting on ester bonds	IPR002792 (PFAM); G3DSA:3.40.50.150 (GENE3D); IPR010280 (PFAM); G3DSA:2.40.50.140 (GENE3D); PTHR11061:SF39 (PANTHER); IPR010280 (PANTHER); IPR030390 (PROSITE_PATTERNS); IPR030391 (PROSITE_PATTERNS); IPR002792 (PROSITE_PROFILES); IPR010280 (PROSITE_PROFILES); IPR025795 (PROSITE_PROFILES); cd02440 (CDD); IPR029063 (SUPERFAMILY)	F:GO:0008173; P:GO:0008033; P:GO:0006396; F:GO:0030697
[INTERPRO, BLASTED, MAPPED, ANNOTATED]	gene_ID_unitig14_24	A0A1L0BQX9_9ASCOCIC11C00000002812 OS=	808	20	0	72.95	1	C:GO:0016021	C:integral component of membrane	PR00449 (PRINTS); SM00174 (SMART); IPR000326 (SMART); SM00175 (SMART); SM00173 (SMART); SM00176 (SMART); IPR000326 (PFAM); IPR000326 (G3DSA:1.20.144.GENE3D); IPR005225 (TIGRFAM); IPR001806 (PFAM); G3DSA:3.40.50.300 (GENE3D); G3DSA:3.30.70.1390 (GENE3D); mobidb-lite (MOBIDB_LITE); PTHR14969 (PANTHER); PTHR14969:SF29 (PANTHER); IPR003578 (PROSITE_PROFILES); cd03388 (CDD); IPR027417 (SUPERFAMILY); I…	F:GO:0005525; P:GO:0007264; F:GO:0003924; C:GO:0005622	F:GTP binding; P:small GTPase mediated signal transduction; F:GTPase activity; C:intracellular
[INTERPRO, BLASTED, MAPPED, ANNOTATED]	gene_ID_unitig14_25	B9WDC5_CANDCCell wall OS=Candida dubliniensis (strain CD36 ATCC MYA-646 CBS 7987 NCPF 3949 NRRL Y-17841) GN=Cd36_81470 PE=4 SV=1	453	20	0	63.15	1	C:GO:0009986	C:cell surface	IPR018805 (PFAM); G3DSA:2.60.120.200 (GENE3D); IPR018807 (PFAM); mobidb-lite (MOBIDB_LITE); PTHR31737 (PANTHER)	no GO terms	no GO terms
[INTERPRO, BLASTED, MAPPED]	gene_ID_unitig14_26	B5RTI7_DEBHADEHA2D15246p OS=Debaryomyces hansenii (strain ATCC 36239 CBS 767 JCM 1990 NBRC 0083 IGC 2968) GN=DEHA2D15246g PE=4 SV=1	1096	20	0	55.1	5	P:GO:0005975; C:GO:0005739; P:GO:0016310; F:GO:0016773; F:GO:0016301	P:carbohydrate metabolic process; C:mitochondrion; P:phosphorylation; F:phosphotransferase activity, alcohol group as acceptor; F:kinase activity	IPR001138 (SMART); IPR001138 (G3DSA:4.10.240.GENE3D); IPR001138 (PFAM); G3DSA:3.30.420.40 (GENE3D); G3DSA:3.30.420.40 (GENE3D); IPR018485 (PFAM); mobidb-lite (MOBIDB_LITE); PTHR43435:SF1 (PANTHER); PTHR43435 (PANTHER); IPR001138 (PROSITE_PATTERNS); IPR001138 (PROSITE_PROFILES); IPR001138 (CDD); SSF53067 (SUPERFAMILY); IPR001138 (SUPERFAMILY)	C:GO:0005634; P:GO:0005975; F:GO:0008270; P:GO:0006355; F:GO:0016773; F:GO:0000981	C:nucleus; P:carbohydrate metabolic process; F:zinc ion binding; P:regulation of transcription, DNA-templated; F:phosphotransferase activity, alcohol group as acceptor; F:RNA polymerase II transcription factor activity, sequence-specific DNA binding
[INTERPRO, BLASTED, MAPPED, ANNOTATED]	gene_ID_unitig14_27	A0A1A0HJV5_9ASCOSerine threonine- phosphatase OS=Metschnikowia bicuspidata bicuspidata NRRL YB-4993 GN=METBIDRAFT_34791 PE=3 SV=1	338	20	0	90.65	2	F:GO:0004721; P:GO:0006470	F:phosphoprotein phosphatase activity; P:protein dephosphorylation	EC:3.1.3.16; EC:3.1.3.41	Protein-serine/threonine phosphatase; 4-nitrophenylphosphatase	IPR006186 (PRINTS); IPR006186 (SMART); IPR029052 (G3DSA:3.60.21.GENE3D); IPR004843 (PFAM); PTHR11668 (PANTHER); PTHR11668:SF339 (PANTHER); IPR006186 (PROSITE_PATTERNS); cd07415 (CDD); IPR029052 (SUPERFAMILY)	F:GO:0016787
[INTERPRO, NO-BLAST]	gene_ID_unitig14_28	---NA---	362	IPR018871 (PFAM); G3DSA:2.60.120.380 (GENE3D)	no GO terms	no GO terms
[INTERPRO, BLASTED, MAPPED, ANNOTATED]	gene_ID_unitig14_29	A0A1A0HK68_9ASCONAD(P)-binding OS=Metschnikowia bicuspidata bicuspidata NRRL YB-4993 GN=METBIDRAFT_36507 PE=4 SV=1	552	20	0	87.4	3	F:GO:0050662; F:GO:0008137; P:GO:0055114	F:coenzyme binding; F:NADH dehydrogenase (ubiquinone) activity; P:oxidation-reduction process	EC:1.6.99.5; EC:1.6.99.3; EC:1.6.5.3	Acting on NADH or NADPH; NADH dehydrogenase; NADH:ubiquinone reductase (H(+)-translocating)	Coil (COILS); IPR018020 (G3DSA:1.10.3330.GENE3D); IPR018020 (PFAM); IPR016040 (PFAM); G3DSA:3.40.50.720 (GENE3D); mobidb-lite (MOBIDB_LITE); PTHR12126 (PANTHER); PTHR12126:SF9 (PANTHER); cd05271 (CDD); IPR018020 (SUPERFAMILY); IPR016040 (SUPERFAMILY)	no GO terms
[INTERPRO, BLASTED, MAPPED, ANNOTATED]	gene_ID_unitig14_30	M3K3J1_CANMXVacuolar H+-ATPase V1 subunit A OS=Candida maltosa (strain Xu316) GN=G210_5299 PE=4 SV=1	1077	20	0	74	11	F:GO:0000166; P:GO:0090304; P:GO:0015992; P:GO:0044260; C:GO:0016020; F:GO:0004518; P:GO:0080144; C:GO:0044444; P:GO:0030908; P:GO:0044763; P:GO:0055080	F:nucleotide binding; P:nucleic acid metabolic process; P:proton transport; P:cellular macromolecule metabolic process; C:membrane; F:nuclease activity; P:amino acid homeostasis; C:cytoplasmic part; P:protein splicing; P:single-organism cellular process; P:cation homeostasis	Coil (COILS); IPR003587 (SMART); IPR027434 (G3DSA:3.10.28.GENE3D); G3DSA:2.170.16.10 (GENE3D); IPR027434 (G3DSA:3.10.28.GENE3D); IPR031686 (PFAM); IPR000194 (PFAM); IPR004100 (PFAM); G3DSA:3.40.50.300 (GENE3D); G3DSA:2.40.50.100 (GENE3D); IPR007869 (PFAM); IPR024034 (G3DSA:1.10.1140.GENE3D); IPR007868 (PFAM); mobidb-lite (MOBIDB_LITE); IPR022878 (PANTHER); PTHR43607:SF1 (PANTHER); IPR020003 (PROS…	F:GO:0005524; F:GO:0003677; P:GO:0015992; P:GO:0016539; F:GO:0004519; P:GO:0046034; P:GO:0030908	F:ATP binding; F:DNA binding; P:proton transport; P:intein-mediated protein splicing; F:endonuclease activity; P:ATP metabolic process; P:protein splicing
[INTERPRO, BLASTED]	gene_ID_unitig14_31	A0A1L0DR73_9ASCOCIC11C00000000423 OS=	377	7	5.35483e-90	47.14	mobidb-lite (MOBIDB_LITE); mobidb-lite (MOBIDB_LITE)	no GO terms	no GO terms
[INTERPRO, BLASTED, MAPPED, ANNOTATED]	gene_ID_unitig14_32	A0A1L0C3T4_9ASCOCIC11C00000004841 OS=	368	20	1.06566e-139	63.05	1	C:GO:0016020	C:membrane	Coil (COILS); IPR018786 (PFAM); mobidb-lite (MOBIDB_LITE); PTHR28062 (PANTHER); PTHR28062:SF2 (PANTHER)	no GO terms	no GO terms
[INTERPRO, BLASTED, MAPPED, ANNOTATED]	gene_ID_unitig14_33	A0A1L0C608_9ASCOCIC11C00000005944 OS=	377	20	0	68.45	1	C:GO:0016020	C:membrane	mobidb-lite (MOBIDB_LITE); PTHR36819 (PANTHER); TMhelix (TMHMM); TMhelix (TMHMM); TMhelix (TMHMM); TMhelix (TMHMM)	no GO terms	no GO terms
[INTERPRO, BLASTED, MAPPED, ANNOTATED]	gene_ID_unitig14_34	A0A1L0DCT4_9ASCOCIC11C00000001354 OS=	781	20	0	79.2	12	F:GO:0003688; F:GO:0004842; F:GO:0031625; P:GO:0000086; P:GO:0000082; C:GO:0005829; P:GO:0031146; C:GO:0043224; P:GO:1903467; F:GO:0030674; F:GO:0016874; P:GO:0042787	F:DNA replication origin binding; F:ubiquitin-protein transferase activity; F:ubiquitin protein ligase binding; P:G2/M transition of mitotic cell cycle; P:G1/S transition of mitotic cell cycle; C:cytosol; P:SCF-dependent proteasomal ubiquitin-dependent protein catabolic process; C:nuclear SCF ubiquitin ligase complex; P:negative regulation of mitotic DNA replication initiation; F:protein binding,…	Coil (COILS); IPR016158 (SMART); IPR019559 (SMART); G3DSA:1.20.1310.10 (GENE3D); G3DSA:4.10.1030.10 (GENE3D); G3DSA:1.20.1310.10 (GENE3D); IPR001373 (PFAM); IPR019559 (PFAM); IPR011991 (G3DSA:1.10.10.GENE3D); IPR011991 (G3DSA:1.10.10.GENE3D); G3DSA:1.20.1310.10 (GENE3D); G3DSA:1.20.1310.10 (GENE3D); PTHR11932 (PANTHER); PTHR11932:SF113 (PANTHER); IPR016157 (PROSITE_PATTERNS); IPR016158 (PROSITE_P…	F:GO:0031625; C:GO:0031461; P:GO:0006511	F:ubiquitin protein ligase binding; C:cullin-RING ubiquitin ligase complex; P:ubiquitin-dependent protein catabolic process
[INTERPRO, BLASTED, MAPPED, ANNOTATED]	gene_ID_unitig14_35	A0A1L0DB25_9ASCOCIC11C00000004560 OS=	1300	20	0	60.2	1	F:GO:0003824	F:catalytic activity	IPR014001 (SMART); G3DSA:3.40.50.300 (GENE3D); IPR001650 (PFAM); IPR000330 (PFAM); G3DSA:3.40.50.10810 (GENE3D); mobidb-lite (MOBIDB_LITE); PTHR10799:SF920 (PANTHER); PTHR10799 (PANTHER); IPR014001 (PROSITE_PROFILES); IPR001650 (PROSITE_PROFILES); cd00046 (CDD); cd00079 (CDD); IPR027417 (SUPERFAMILY); IPR027417 (SUPERFAMILY)	F:GO:0005524	F:ATP binding
[INTERPRO, BLASTED, MAPPED, ANNOTATED]	gene_ID_unitig14_36	A0A1A0HJW4_9ASCOBRO-1domain-containing OS=Metschnikowia bicuspidata bicuspidata NRRL YB-4993 GN=METBIDRAFT_37172 PE=4 SV=1	948	20	0	61.7	4	P:GO:0071285; P:GO:0045324; C:GO:0010008; P:GO:0006623	P:cellular response to lithium ion; P:late endosome to vacuole transport; C:endosome membrane; P:protein targeting to vacuole	Coil (COILS); Coil (COILS); IPR004328 (SMART); IPR025304 (PFAM); G3DSA:1.20.120.560 (GENE3D); G3DSA:1.25.40.280 (GENE3D); IPR004328 (PFAM); mobidb-lite (MOBIDB_LITE); mobidb-lite (MOBIDB_LITE); PTHR23030:SF29 (PANTHER); PTHR23030 (PANTHER); IPR004328 (PROSITE_PROFILES)	F:GO:0005515	F:protein binding
[INTERPRO, BLASTED, MAPPED, ANNOTATED]	gene_ID_unitig14_37	A0A1L0DMU2_9ASCOCIC11C00000004275 OS=	453	20	1.58685e-174	70	12	P:GO:0031505; P:GO:0005975; P:GO:0044406; C:GO:0030428; P:GO:0070783; C:GO:0005576; P:GO:0009405; C:GO:0030446; C:GO:0009986; C:GO:0030445; C:GO:0046658; F:GO:0016798	P:fungal-type cell wall organization; P:carbohydrate metabolic process; P:adhesion of symbiont to host; C:cell septum; P:growth of unicellular organism as a thread of attached cells; C:extracellular region; P:patho_	genesis; C:hyphal cell wall; C:cell surface; C:yeast-form cell wall; C:anchored component of plasma membrane; F:hydrolase activity, acting on glycosyl bonds	IPR001002 (G3DSA:3.30.60.GENE3D); IPR000757 (PFAM); G3DSA:2.60.120.200 (GENE3D); IPR017168 (PIRSF); mobidb-lite (MOBIDB_LITE); PTHR10963 (PANTHER); PTHR10963:SF43 (PANTHER); IPR000757 (PROSITE_PROFILES); cd06923 (CDD); IPR013320 (SUPERFAMILY); TMhelix (TMHMM)	P:GO:0005975; F:GO:0008061; C:GO:0005618; P:GO:0071555; F:GO:0004553; F:GO:0016798	P:carbohydrate metabolic process; F:chitin binding; C:cell wall; P:cell wall organization; F:hydrolase activity, hydrolyzing O-glycosyl compounds; F:hydrolase activity, acting on glycosyl bonds
[INTERPRO, BLASTED, MAPPED, ANNOTATED]	gene_ID_unitig14_38	A0A1L0DMU2_9ASCOCIC11C00000004275 OS=	456	20	0	75.15	15	P:GO:0044406; F:GO:0016757; C:GO:0005576; F:GO:0004553; P:GO:0009405; P:GO:0006037; C:GO:0009986; C:GO:0046658; C:GO:0000144; P:GO:0031505; C:GO:0030428; P:GO:0070783; C:GO:0016021; C:GO:0030446; C:GO:0030445	P:adhesion of symbiont to host; F:transferase activity, transferring glycosyl groups; C:extracellular region; F:hydrolase activity, hydrolyzing O-glycosyl compounds; P:patho_	genesis; P:cell wall chitin metabolic process; C:cell surface; C:anchored component of plasma membrane; C:cellular bud neck septin ring; P:fungal-type cell wall organization; C:cell septum; P:growth of unicellular organism as a thread of attached cells; C:integral component of membrane; C:hyphal cell wall; C:yeast-form cell wall	G3DSA:2.60.120.200 (GENE3D); IPR001002 (G3DSA:3.30.60.GENE3D); IPR017168 (PIRSF); IPR000757 (PFAM); mobidb-lite (MOBIDB_LITE); PTHR10963:SF43 (PANTHER); PTHR10963 (PANTHER); IPR000757 (PROSITE_PROFILES); cd06923 (CDD); IPR013320 (SUPERFAMILY)	P:GO:0005975; F:GO:0008061; C:GO:0005618; P:GO:0071555; F:GO:0004553; F:GO:0016798	P:carbohydrate metabolic process; F:chitin binding; C:cell wall; P:cell wall organization; F:hydrolase activity, hydrolyzing O-glycosyl compounds; F:hydrolase activity, acting on glycosyl bonds
[INTERPRO, BLASTED, MAPPED, ANNOTATED]	gene_ID_unitig14_39	A0A1A0HKG0_9ASCOCoatomer subunit alpha OS=Metschnikowia bicuspidata bicuspidata NRRL YB-4993 GN=METBIDRAFT_38366 PE=4 SV=1	1212	20	0	85.8	7	P:GO:0006888; F:GO:0043130; P:GO:0006890; F:GO:0005198; C:GO:0000139; P:GO:0006886; C:GO:0030126	P:ER to Golgi vesicle-mediated transport; F:ubiquitin binding; P:retrograde vesicle-mediated transport, Golgi to ER; F:structural molecule activity; C:Golgi membrane; P:intracellular protein transport; C:COPI vesicle coat	IPR020472 (PRINTS); IPR001680 (SMART); G3DSA:2.40.50.140 (GENE3D); G3DSA:1.10.10.670 (GENE3D); G3DSA:2.80.10.50 (GENE3D); IPR010714 (PFAM); IPR016391 (PIRSF); IPR015943 (G3DSA:2.130.10.GENE3D); IPR015943 (G3DSA:2.130.10.GENE3D); IPR006692 (PFAM); IPR001680 (PFAM); PTHR19876 (PANTHER); PTHR19876:SF13 (PANTHER); IPR019775 (PROSITE_PATTERNS); IPR019775 (PROSITE_PATTERNS); IPR017986 (PROSITE_PROFILES…	C:GO:0030117; F:GO:0005515; P:GO:0016192; F:GO:0005198; P:GO:0006886; C:GO:0030126	C:membrane coat; F:protein binding; P:vesicle-mediated transport; F:structural molecule activity; P:intracellular protein transport; C:COPI vesicle coat
[INTERPRO, BLASTED, MAPPED, ANNOTATED]	gene_ID_unitig14_40	A0A1L0BQT9_9ASCOSerine threonine- phosphatase OS=	595	20	0	82.55	4	C:GO:0005634; F:GO:0004721; C:GO:0005737; P:GO:0006470	C:nucleus; F:phosphoprotein phosphatase activity; C:cytoplasm; P:protein dephosphorylation	EC:3.1.3.16; EC:3.1.3.41	Protein-serine/threonine phosphatase; 4-nitrophenylphosphatase	IPR006186 (PRINTS); IPR019734 (SMART); IPR006186 (SMART); PF13414 (PFAM); G3DSA:1.10.287.1110 (GENE3D); PIRSF033096 (PIRSF); IPR004843 (PFAM); IPR011990 (G3DSA:1.25.40.GENE3D); IPR029052 (G3DSA:3.60.21.GENE3D); G3DSA:1.10.150.160 (GENE3D); IPR013235 (PFAM); mobidb-lite (MOBIDB_LITE); PTHR11668 (PANTHER); IPR011236 (PTHR11668:PANTHER); IPR006186 (PROSITE_PATTERNS); IPR019734 (PROSITE_PROFILES); IP…	F:GO:0004721; F:GO:0005515; P:GO:0006470; F:GO:0016787
[INTERPRO, BLASTED, MAPPED]	gene_ID_unitig14_41	A0A1L0DNX9_9ASCOCIC11C00000000257 OS=	550	20	1.80095e-148	48.35	2	C:GO:0005634; F:GO:0042393	C:nucleus; F:histone binding	Coil (COILS); IPR013087 (SMART); IPR018465 (PFAM); G3DSA:3.30.160.60 (GENE3D); mobidb-lite (MOBIDB_LITE)	F:GO:0003676; C:GO:0005634; F:GO:0042393	F:nucleic acid binding; C:nucleus; F:histone binding
[INTERPRO, BLASTED, MAPPED, ANNOTATED]	gene_ID_unitig14_42	A0A1A0HJW8_9ASCOATP-dependent metallopeptidase Hfl OS=Metschnikowia bicuspidata bicuspidata NRRL YB-4993 GN=METBIDRAFT_30608 PE=3 SV=1	792	20	0	85.55	11	C:GO:0005745; F:GO:0016887; F:GO:0005524; F:GO:0008270; C:GO:0097002; P:GO:0006461; P:GO:0002181; P:GO:0006465; F:GO:0004222; P:GO:0001302; C:GO:0005886	C:m-AAA complex; F:ATPase activity; F:ATP binding; F:zinc ion binding; C:mitochondrial inner boundary membrane; P:protein complex assembly; P:cytoplasmic translation; P:signal peptide processing; F:metalloendopeptidase activity; P:replicative cell aging; C:plasma membrane	EC:3.4.24; EC:3.6.1.3; EC:3.6.1.15	Acting on peptide bonds (peptidases); Adenosinetriphosphatase; Nucleoside-triphosphate phosphatase	IPR003593 (SMART); IPR005936 (TIGRFAM); IPR000642 (PFAM); G3DSA:1.10.8.60 (GENE3D); G3DSA:3.40.50.300 (GENE3D); IPR003959 (PFAM); mobidb-lite (MOBIDB_LITE); PTHR43655 (PANTHER); PTHR43655:SF14 (PANTHER); IPR003960 (PROSITE_PATTERNS); IPR005936 (HAMAP); cd00009 (CDD); SSF140990 (SUPERFAMILY); IPR027417 (SUPERFAMILY); TMhelix (TMHMM); TMhelix (TMHMM)	F:GO:0005524; C:GO:0016020; P:GO:0006508; F:GO:0004222
[INTERPRO, BLASTED, MAPPED]	gene_ID_unitig14_43	A0A1L0E169_9ASCOCIC11C00000001604 OS=	383	18	1.76725e-135	43.33	7	P:GO:0046020; F:GO:0003677; C:GO:0005634; P:GO:2000218; P:GO:1900240; P:GO:2000221; F:GO:0008134	P:negative regulation of transcription from RNA polymerase II promoter by pheromones; F:DNA binding; C:nucleus; P:negative regulation of invasive growth in response to glucose limitation; P:negative regulation of phenotypic switching; P:negative regulation of pseudohyphal growth; F:transcription factor binding	Coil (COILS); mobidb-lite (MOBIDB_LITE); mobidb-lite (MOBIDB_LITE)	no GO terms	no GO terms
[INTERPRO, BLASTED, MAPPED, ANNOTATED]	gene_ID_unitig14_44	A0A1L0DR91_9ASCOCIC11C00000005075 OS=	1291	20	0	76.2	14	P:GO:0007160; P:GO:0016337; P:GO:0006493; P:GO:0006057; C:GO:0005794; C:GO:0005576; P:GO:0043710; F:GO:0000026; P:GO:0009405; C:GO:0005886; P:GO:0031505; P:GO:0030447; P:GO:0097502; P:GO:0051834	P:cell-matrix adhesion; P:single organismal cell-cell adhesion; P:protein O-linked glycosylation; P:mannoprotein biosynthetic process; C:Golgi apparatus; C:extracellular region; P:cell adhesion involved in multi-species biofilm formation; F:alpha-1,2-mannosyltransferase activity; P:patho_	genesis; C:plasma membrane; P:fungal-type cell wall organization; P:filamentous growth; P:mannosylation; P:evasion or tolerance of defenses of other organism involved in symbiotic interaction	IPR002685 (PFAM); IPR029044 (G3DSA:3.90.550.GENE3D); mobidb-lite (MOBIDB_LITE); mobidb-lite (MOBIDB_LITE); mobidb-lite (MOBIDB_LITE); IPR002685 (PANTHER); PTHR31121:SF15 (PANTHER); IPR029044 (SUPERFAMILY); IPR029044 (SUPERFAMILY); IPR029044 (SUPERFAMILY); TMhelix (TMHMM)	F:GO:0000030; C:GO:0016020; P:GO:0006486	F:mannosyltransferase activity; C:membrane; P:protein glycosylation
[INTERPRO, BLASTED]	gene_ID_unitig14_45	A0A1L0BQL7_9ASCOCIC11C00000002781 OS=	710	20	3.92494e-143	50.85	Coil (COILS); IPR000195 (SMART); G3DSA:1.10.8.270 (GENE3D); IPR000195 (PFAM); mobidb-lite (MOBIDB_LITE); mobidb-lite (MOBIDB_LITE); PTHR22957 (PANTHER); PTHR22957:SF357 (PANTHER); IPR000195 (PROSITE_PROFILES); IPR000195 (SUPERFAMILY); IPR000195 (SUPERFAMILY)	no GO terms	no GO terms
[INTERPRO, BLASTED, MAPPED, ANNOTATED]	gene_ID_unitig14_46	A0A1A0HJX3_9ASCONuclear localization factor and ER translocation component OS=Metschnikowia bicuspidata bicuspidata NRRL YB-4993 GN=METBIDRAFT_77125 PE=4 SV=1	565	20	0	73.7	9	C:GO:0031967; C:GO:0005634; C:GO:0098796; P:GO:0006515; C:GO:0000835; P:GO:0015031; P:GO:0030433; C:GO:0031090; P:GO:0071218	C:organelle envelope; C:nucleus; C:membrane protein complex; P:misfolded or incompletely synthesized protein catabolic process; C:ER ubiquitin ligase complex; P:protein transport; P:ER-associated ubiquitin-dependent protein catabolic process; C:organelle membrane; P:cellular response to misfolded protein	IPR016563 (PIRSF); IPR007717 (PFAM); IPR007716 (PFAM); PTHR12710 (PANTHER); IPR007717 (CDD)	P:GO:0006511	P:ubiquitin-dependent protein catabolic process
[INTERPRO, BLASTED, MAPPED, ANNOTATED]	gene_ID_unitig14_47	A0A1A0HK88_9ASCOHeat shock 70 OS=Metschnikowia bicuspidata bicuspidata NRRL YB-4993 GN=METBIDRAFT_77126 PE=3 SV=1	698	20	0	87.15	5	C:GO:0005634; F:GO:0005524; P:GO:0035690; C:GO:0005829; P:GO:0009405	C:nucleus; F:ATP binding; P:cellular response to drug; C:cytosol; P:patho_	genesis	Coil (COILS); IPR013126 (PRINTS); G3DSA:3.30.420.40 (GENE3D); IPR013126 (PFAM); G3DSA:3.30.420.40 (GENE3D); IPR029048 (G3DSA:1.20.1270.GENE3D); IPR029047 (G3DSA:2.60.34.GENE3D); G3DSA:3.90.640.10 (GENE3D); mobidb-lite (MOBIDB_LITE); PTHR19375 (PANTHER); PTHR19375:SF275 (PANTHER); cd10228 (CDD); SSF53067 (SUPERFAMILY); IPR029048 (SUPERFAMILY); SSF53067 (SUPERFAMILY); IPR029047 (SUPERFAMILY)	no GO terms	no GO terms
[INTERPRO, BLASTED, MAPPED, ANNOTATED]	gene_ID_unitig14_48	A0A1A0HKG9_9ASCOKinase OS=Metschnikowia bicuspidata bicuspidata NRRL YB-4993 GN=METBIDRAFT_77127 PE=4 SV=1	777	20	0	73	8	F:GO:0005524; P:GO:0042307; C:GO:0005737; P:GO:0042493; P:GO:0006376; F:GO:0004674; P:GO:0006468; P:GO:0030003	F:ATP binding; P:positive regulation of protein import into nucleus; C:cytoplasm; P:response to drug; P:mRNA splice site selection; F:protein serine/threonine kinase activity; P:protein phosphorylation; P:cellular cation homeostasis	EC:2.7.11	Transferring phosphorus-containing groups	Coil (COILS); IPR000719 (SMART); G3DSA:1.10.510.10 (GENE3D); IPR000719 (PFAM); G3DSA:3.30.200.20 (GENE3D); mobidb-lite (MOBIDB_LITE); mobidb-lite (MOBIDB_LITE); mobidb-lite (MOBIDB_LITE); mobidb-lite (MOBIDB_LITE); PTHR24055:SF274 (PANTHER); PTHR24055 (PANTHER); IPR008271 (PROSITE_PATTERNS); IPR017441 (PROSITE_PATTERNS); IPR000719 (PROSITE_PROFILES); IPR011009 (SUPERFAMILY)	F:GO:0005524; F:GO:0004672; P:GO:0006468
[INTERPRO, BLASTED, MAPPED, ANNOTATED]	gene_ID_unitig14_49	A0A1L0DNY5_9ASCOElongator complex 3 OS=	549	20	0	95.8	4	F:GO:0004402; C:GO:0005829; P:GO:0016573; F:GO:0051536	F:histone acetyltransferase activity; C:cytosol; P:histone acetylation; F:iron-sulfur cluster binding	EC:2.3.1.48	Histone acetyltransferase	IPR006638 (SMART); G3DSA:3.40.630.30 (GENE3D); IPR000182 (PFAM); IPR005910 (TIGRFAM); IPR007197 (PFAM); IPR032432 (PFAM); IPR005910 (PIRSF); IPR013785 (G3DSA:3.20.20.GENE3D); PTHR11135:SF9 (PANTHER); PTHR11135 (PANTHER); IPR000182 (PROSITE_PROFILES); cd01335 (CDD); SSF102114 (SUPERFAMILY); IPR016181 (SUPERFAMILY)	F:GO:0003824; F:GO:0051536; F:GO:0008080
[INTERPRO, BLASTED, MAPPED, ANNOTATED]	gene_ID_unitig14_50	A0A1A0HJV8_9ASCOMBA1 OS=Metschnikowia bicuspidata bicuspidata NRRL YB-4993 GN=METBIDRAFT_77129 PE=4 SV=1	293	20	7.69005e-162	70	7	P:GO:0032979; P:GO:0097034; P:GO:0097033; F:GO:0043022; P:GO:0070131; P:GO:0007007; C:GO:0005743	P:protein insertion into mitochondrial membrane from inner side; P:mitochondrial respiratory chain complex IV bio_	genesis; P:mitochondrial respiratory chain complex III bio_	genesis; F:ribosome binding; P:positive regulation of mitochondrial translation; P:inner mitochondrial membrane organization; C:mitochondrial inner membrane	IPR024621 (PFAM); PTHR13333 (PANTHER)	P:GO:0032979; C:GO:0005743
[INTERPRO, BLASTED, MAPPED, ANNOTATED]	gene_ID_unitig14_51	G8YMP0_PICSOPiso0_001258 OS=Pichia sorbitophila (strain ATCC MYA-4447 BCRC 22081 CBS 7064 NBRC 10061 NRRL Y-12695) GN=Piso0_001258 PE=4 SV=1	398	20	1.05635e-61	76.45	1	F:GO:0046872	F:metal ion binding	IPR000571 (SMART); G3DSA:4.10.1000.10 (GENE3D); G3DSA:4.10.1000.10 (GENE3D); IPR000571 (PFAM); mobidb-lite (MOBIDB_LITE); mobidb-lite (MOBIDB_LITE); mobidb-lite (MOBIDB_LITE); mobidb-lite (MOBIDB_LITE); PTHR11224:SF50 (PANTHER); PTHR11224 (PANTHER); IPR000571 (PROSITE_PROFILES); IPR000571 (PROSITE_PROFILES); IPR000571 (SUPERFAMILY)	F:GO:0046872	F:metal ion binding
[INTERPRO, NO-BLAST]	gene_ID_unitig14_52	---NA---	148	no IPS match	no IPS match	no IPS match
[INTERPRO, BLASTED]	gene_ID_unitig14_53	A0A1L0GN96_9ASCOCIC11C00000004735 OS=	277	4	2.15313e-49	54.75	mobidb-lite (MOBIDB_LITE); mobidb-lite (MOBIDB_LITE)	no GO terms	no GO terms
[INTERPRO, BLASTED, MAPPED, ANNOTATED]	gene_ID_unitig14_54	A0A1L0C255_9ASCOCIC11C00000005132 OS=	589	20	0	59.2	1	C:GO:0016020	C:membrane	mobidb-lite (MOBIDB_LITE); PTHR13205:SF16 (PANTHER); IPR032974 (PANTHER); TMhelix (TMHMM); TMhelix (TMHMM); TMhelix (TMHMM); TMhelix (TMHMM); TMhelix (TMHMM); TMhelix (TMHMM); TMhelix (TMHMM); TMhelix (TMHMM); TMhelix (TMHMM); TMhelix (TMHMM); TMhelix (TMHMM)	no GO terms	no GO terms
[INTERPRO, BLASTED, MAPPED, ANNOTATED]	gene_ID_unitig14_55	A0A1A0HJH2_9ASCOClass I glutamine amidotransferase OS=Metschnikowia bicuspidata bicuspidata NRRL YB-4993 GN=METBIDRAFT_35629 PE=4 SV=1	233	20	4.54299e-147	69.5	3	F:GO:0019172; P:GO:0019243; C:GO:0005829	F:glyoxalase III activity; P:methylglyoxal catabolic process to D-lactate via S-lactoyl-glutathione; C:cytosol	IPR029062 (G3DSA:3.40.50.GENE3D); IPR002818 (PFAM); PTHR43824 (PANTHER); PTHR43824:SF3 (PANTHER); IPR029062 (SUPERFAMILY)	no GO terms	no GO terms
[INTERPRO, BLASTED, MAPPED, ANNOTATED]	gene_ID_unitig14_56	A0A1A0HJW2_9ASCOAP-3 complex subunit delta OS=Metschnikowia bicuspidata bicuspidata NRRL YB-4993 GN=METBIDRAFT_77132 PE=3 SV=1	1069	20	0	70.1	4	C:GO:0005634; C:GO:0030123; P:GO:0006623; P:GO:0006896	C:nucleus; C:AP-3 adaptor complex; P:protein targeting to vacuole; P:Golgi to vacuole transport	Coil (COILS); IPR017105 (PIRSF); IPR011989 (G3DSA:1.25.10.GENE3D); IPR002553 (PFAM); mobidb-lite (MOBIDB_LITE); mobidb-lite (MOBIDB_LITE); mobidb-lite (MOBIDB_LITE); IPR017105 (PTHR22781:PANTHER); PTHR22781 (PANTHER); cd00020 (CDD); IPR016024 (SUPERFAMILY)	C:GO:0030117; P:GO:0016192; P:GO:0015031; C:GO:0030123; P:GO:0006886; F:GO:0005488	C:membrane coat; P:vesicle-mediated transport; P:protein transport; C:AP-3 adaptor complex; P:intracellular protein transport; F:binding
[INTERPRO, BLASTED, MAPPED]	gene_ID_unitig14_57	A0A1L0C1Y1_9ASCOCIC11C00000001187 OS=	256	20	2.47549e-50	61.4	1	F:GO:0003674	F:molecular_function	Coil (COILS); IPR019371 (PFAM); mobidb-lite (MOBIDB_LITE); mobidb-lite (MOBIDB_LITE); PTHR37787 (PANTHER)	no GO terms	no GO terms
[INTERPRO, BLASTED, MAPPED, ANNOTATED]	gene_ID_unitig14_58	A0A1L0BZS9_9ASCOCIC11C00000001795 OS=	718	20	0	67.95	2	C:GO:0044424; F:GO:0016787	C:intracellular part; F:hydrolase activity	G3DSA:2.100.10.30 (GENE3D); IPR024079 (G3DSA:3.40.390.GENE3D); IPR021917 (PFAM); PTHR21054:SF3 (PANTHER); PTHR21054 (PANTHER); IPR001229 (PROSITE_PROFILES); IPR001229 (SUPERFAMILY)	F:GO:0008237	F:metallopeptidase activity
[INTERPRO, BLASTED, MAPPED]	gene_ID_unitig14_59	A0A1A0HK99_9ASCOPhospholipase D nuclease OS=Metschnikowia bicuspidata bicuspidata NRRL YB-4993 GN=METBIDRAFT_30620 PE=4 SV=1	598	20	0	63.6	4	P:GO:0006281; C:GO:0005634; F:GO:0003824; F:GO:0008081	P:DNA repair; C:nucleus; F:catalytic activity; F:phosphoric diester hydrolase activity	Coil (COILS); IPR027415 (G3DSA:3.30.870.GENE3D); IPR010347 (PFAM); G3DSA:3.30.870.10 (GENE3D); mobidb-lite (MOBIDB_LITE); IPR010347 (PANTHER); PTHR12415:SF3 (PANTHER); cd09196 (CDD); SSF56024 (SUPERFAMILY); SSF56024 (SUPERFAMILY)	C:GO:0005634; P:GO:0006281; F:GO:0008081	C:nucleus; P:DNA repair; F:phosphoric diester hydrolase activity
[INTERPRO, BLASTED, MAPPED, ANNOTATED]	gene_ID_unitig14_60	A0A1A0HKH9_9ASCOStructural maintenance of chromosomes OS=Metschnikowia bicuspidata bicuspidata NRRL YB-4993 GN=METBIDRAFT_35348 PE=3 SV=1	1749	20	0	70.75	9	C:GO:0005634; P:GO:0006281; P:GO:0007062; P:GO:0045132; P:GO:0006310; C:GO:0005694; F:GO:0005488; P:GO:0070192; P:GO:0007127	C:nucleus; P:DNA repair; P:sister chromatid cohesion; P:meiotic chromosome segregation; P:DNA recombination; C:chromosome; F:binding; P:chromosome organization involved in meiotic cell cycle; P:meiosis I	Coil (COILS); Coil (COILS); Coil (COILS); Coil (COILS); Coil (COILS); Coil (COILS); Coil (COILS); Coil (COILS); Coil (COILS); Coil (COILS); Coil (COILS); IPR010935 (SMART); IPR001199 (SMART); IPR010935 (PFAM); IPR001199 (G3DSA:3.10.120.GENE3D); IPR005804 (PFAM); G3DSA:3.40.50.300 (GENE3D); IPR003395 (PFAM); IPR001199 (PFAM); G3DSA:1.20.5.50 (GENE3D); G3DSA:3.40.50.300 (GENE3D); mobidb-lite (MOBID…	F:GO:0005524; P:GO:0006281; F:GO:0005515; P:GO:0051276; P:GO:0006629; P:GO:0007064; C:GO:0008278; C:GO:0005694; F:GO:0003682	F:ATP binding; P:DNA repair; F:protein binding; P:chromosome organization; P:lipid metabolic process; P:mitotic sister chromatid cohesion; C:cohesin complex; C:chromosome; F:chromatin binding
[INTERPRO, BLASTED, MAPPED]	gene_ID_unitig14_61	A0A1L0C016_9ASCOCIC11C00000003672 OS=	289	20	2.58649e-77	60.55	1	F:GO:0046872	F:metal ion binding	IPR000571 (SMART); IPR000571 (PFAM); IPR019496 (PFAM); G3DSA:4.10.1000.10 (GENE3D); mobidb-lite (MOBIDB_LITE); mobidb-lite (MOBIDB_LITE); mobidb-lite (MOBIDB_LITE); PTHR13309 (PANTHER); IPR000571 (PROSITE_PROFILES); IPR000571 (SUPERFAMILY)	F:GO:0046872	F:metal ion binding
[INTERPRO, BLASTED, MAPPED, ANNOTATED]	gene_ID_unitig14_62	A0A1A0HJY8_9ASCOSerine-tRNA ligase OS=Metschnikowia bicuspidata bicuspidata NRRL YB-4993 GN=METBIDRAFT_10468 PE=4 SV=1	457	20	0	91.65	5	P:GO:0097056; F:GO:0005524; C:GO:0005829; F:GO:0004828; P:GO:0006434	P:selenocysteinyl-tRNA(Sec) biosynthetic process; F:ATP binding; C:cytosol; F:serine-tRNA ligase activity; P:seryl-tRNA aminoacylation	EC:6.1.1.11	Serine--tRNA ligase	Coil (COILS); IPR002317 (PRINTS); IPR002317 (TIGRFAM); IPR002314 (PFAM); IPR002317 (PIRSF); IPR015866 (PFAM); G3DSA:3.30.930.10 (GENE3D); G3DSA:1.10.287.40 (GENE3D); IPR002317 (PANTHER); PTHR11778:SF14 (PANTHER); IPR006195 (PROSITE_PROFILES); IPR033729 (CDD); IPR010978 (SUPERFAMILY); SSF55681 (SUPERFAMILY)	F:GO:0000166; F:GO:0005524; P:GO:0006418; F:GO:0004812; C:GO:0005737; F:GO:0004828; P:GO:0006434
[INTERPRO, BLASTED, MAPPED, ANNOTATED]	gene_ID_unitig14_63	A0A1L0GN73_9ASCOCIC11C00000005833 OS=	470	20	0	71.9	2	P:GO:0006281; C:GO:0044424	P:DNA repair; C:intracellular part	IPR020472 (PRINTS); IPR001680 (SMART); IPR015943 (G3DSA:2.130.10.GENE3D); IPR001680 (PFAM); mobidb-lite (MOBIDB_LITE); PTHR22850 (PANTHER); PTHR22850:SF160 (PANTHER); IPR019775 (PROSITE_PATTERNS); IPR019775 (PROSITE_PATTERNS); IPR019775 (PROSITE_PATTERNS); IPR001680 (PROSITE_PROFILES); IPR001680 (PROSITE_PROFILES); IPR001680 (PROSITE_PROFILES); IPR017986 (PROSITE_PROFILES); IPR001680 (PROSITE_PRO…	F:GO:0005515	F:protein binding
[INTERPRO, BLASTED, MAPPED, ANNOTATED]	gene_ID_unitig15_1_partial	A0A1L0C316_9ASCOCIC11C00000002141 OS=	385	20	4.41655e-159	66.2	4	F:GO:0000166; F:GO:0003676; P:GO:0043628; P:GO:0006401	F:nucleotide binding; F:nucleic acid binding; P:ncRNA 3'-end processing; P:RNA catabolic process	IPR006569 (SMART); IPR008942 (G3DSA:1.25.40.GENE3D); mobidb-lite (MOBIDB_LITE); mobidb-lite (MOBIDB_LITE); PTHR23189:SF57 (PANTHER); PTHR23189 (PANTHER); IPR006569 (PROSITE_PROFILES); IPR008942 (SUPERFAMILY)	no GO terms	no GO terms
[INTERPRO, BLASTED, MAPPED, ANNOTATED]	gene_ID_unitig15_2	A0A1L0C5P2_9ASCOCIC11C00000000077 OS=	265	20	6.80511e-158	75.2	2	F:GO:0003735; C:GO:0005762	F:structural constituent of ribosome; C:mitochondrial large ribosomal subunit	G3DSA:3.90.79.10 (GENE3D); IPR021757 (PFAM); PTHR13124:SF13 (PANTHER); PTHR13124 (PANTHER)	no GO terms	no GO terms
[INTERPRO, BLASTED, MAPPED, ANNOTATED]	gene_ID_unitig15_3	A0A1A0HJ23_9ASCODUF1692-domain-containing OS=Metschnikowia bicuspidata bicuspidata NRRL YB-4993 GN=METBIDRAFT_30358 PE=4 SV=1	416	20	0	79.6	4	P:GO:0006888; C:GO:0030173; C:GO:0030176; C:GO:0030134	P:ER to Golgi vesicle-mediated transport; C:integral component of Golgi membrane; C:integral component of endoplasmic reticulum membrane; C:ER to Golgi transport vesicle	IPR012936 (PFAM); PF13850 (PFAM); PTHR10984 (PANTHER); PTHR10984:SF39 (PANTHER); TMhelix (TMHMM); TMhelix (TMHMM)	no GO terms	no GO terms
[INTERPRO, BLASTED, MAPPED]	gene_ID_unitig15_4	A0A1A0HJ09_9ASCOWD40 repeat OS=Metschnikowia bicuspidata bicuspidata NRRL YB-4993 GN=METBIDRAFT_37089 PE=4 SV=1	400	20	8.29317e-116	57.05	2	P:GO:0008150; C:GO:0000346	P:biological_process; C:transcription export complex	IPR001680 (SMART); IPR011042 (G3DSA:2.120.10.GENE3D); IPR001680 (PFAM); IPR015943 (G3DSA:2.130.10.GENE3D); mobidb-lite (MOBIDB_LITE); PTHR22839 (PANTHER); IPR017986 (PROSITE_PROFILES); IPR001680 (PROSITE_PROFILES); IPR001680 (PROSITE_PROFILES); IPR017986 (SUPERFAMILY)	F:GO:0005515	F:protein binding
[INTERPRO, BLASTED, MAPPED, ANNOTATED]	gene_ID_unitig15_5	A0A1L0DN39_9ASCOCIC11C00000005099 OS=	791	20	0	72.55	3	P:GO:0035023; F:GO:0005089; P:GO:0043547	P:regulation of Rho protein signal transduction; F:Rho guanyl-nucleotide exchange factor activity; P:positive regulation of GTPase activity	Coil (COILS); IPR000219 (SMART); IPR000270 (SMART); IPR000270 (PFAM); IPR010481 (PFAM); G3DSA:1.20.900.10 (GENE3D); PF15411 (PFAM); IPR000219 (PFAM); IPR011993 (G3DSA:2.30.29.GENE3D); G3DSA:3.10.20.90 (GENE3D); mobidb-lite (MOBIDB_LITE); mobidb-lite (MOBIDB_LITE); PTHR22826 (PANTHER); PTHR22826:SF166 (PANTHER); IPR000219 (PROSITE_PROFILES); IPR001849 (PROSITE_PROFILES); IPR000270 (PROSITE_PROFILE…	P:GO:0035023; F:GO:0005515; F:GO:0005089	P:regulation of Rho protein signal transduction; F:protein binding; F:Rho guanyl-nucleotide exchange factor activity
[INTERPRO, BLASTED, MAPPED, ANNOTATED]	gene_ID_unitig15_6	A0A1L0DQC5_9ASCOCIC11C00000005900 OS=	660	20	0	84	3	F:GO:0004174; P:GO:0055114; F:GO:0051536	F:electron-transferring-flavoprotein dehydrogenase activity; P:oxidation-reduction process; F:iron-sulfur cluster binding	EC:1.5.5.1	Electron-transferring-flavoprotein dehydrogenase	IPR023753 (G3DSA:3.50.50.GENE3D); PF05187 (PFAM); IPR006076 (PFAM); PTHR10617 (PANTHER); PTHR10617:SF120 (PANTHER); SSF54373 (SUPERFAMILY); SSF54862 (SUPERFAMILY); IPR023753 (SUPERFAMILY)	F:GO:0016491; P:GO:0055114
[INTERPRO, BLASTED, MAPPED, ANNOTATED]	gene_ID_unitig15_7	A0A1L0GF31_9ASCOCIC11C00000001022 OS=	516	20	0	63.25	2	C:GO:0005737; C:GO:0043231	C:cytoplasm; C:intracellular membrane-bounded organelle	mobidb-lite (MOBIDB_LITE); mobidb-lite (MOBIDB_LITE); mobidb-lite (MOBIDB_LITE)	no GO terms	no GO terms
[INTERPRO, BLASTED, MAPPED]	gene_ID_unitig15_8	A0A1A0HIL3_9ASCOClavaminate synthase OS=Metschnikowia bicuspidata bicuspidata NRRL YB-4993 GN=METBIDRAFT_34094 PE=4 SV=1	517	20	0	56.95	1	C:GO:0005634	C:nucleus	PF13621 (PFAM); G3DSA:2.60.120.650 (GENE3D); mobidb-lite (MOBIDB_LITE); PTHR12461 (PANTHER); PTHR12461:SF56 (PANTHER); IPR003347 (PROSITE_PROFILES); SSF51197 (SUPERFAMILY)	no GO terms	no GO terms
[INTERPRO, BLASTED, MAPPED, ANNOTATED]	gene_ID_unitig15_9	A0A1L0DFT1_9ASCOCIC11C00000002973 OS=	430	20	0	64.95	8	P:GO:0030448; P:GO:0044182; P:GO:1900429; F:GO:0016538; P:GO:0035690; P:GO:0000082; P:GO:0007114; P:GO:0000079	P:hyphal growth; P:filamentous growth of a population of unicellular organisms; P:negative regulation of filamentous growth of a population of unicellular organisms; F:cyclin-dependent protein serine/threonine kinase regulator activity; P:cellular response to drug; P:G1/S transition of mitotic cell cycle; P:cell budding; P:regulation of cyclin-dependent protein serine/threonine kinase activity	IPR013763 (SMART); PIRSF001771 (PIRSF); IPR013763 (G3DSA:1.10.472.GENE3D); IPR013763 (G3DSA:1.10.472.GENE3D); IPR006671 (PFAM); PTHR10177 (PANTHER); PTHR10177:SF312 (PANTHER); IPR006671 (PROSITE_PATTERNS); cd00043 (CDD); IPR013763 (SUPERFAMILY)	no GO terms	no GO terms
[INTERPRO, BLASTED, MAPPED, ANNOTATED]	gene_ID_unitig15_10	A0A1A0HJD0_9ASCOCysteine ase OS=Metschnikowia bicuspidata bicuspidata NRRL YB-4993 GN=METBIDRAFT_34203 PE=4 SV=1	325	20	6.65118e-147	64.95	1	C:GO:0005737	C:cytoplasm	Coil (COILS); Coil (COILS); IPR003323 (PFAM); mobidb-lite (MOBIDB_LITE); mobidb-lite (MOBIDB_LITE); mobidb-lite (MOBIDB_LITE); PTHR12419:SF38 (PANTHER); PTHR12419 (PANTHER); IPR003323 (PROSITE_PROFILES); SSF54001 (SUPERFAMILY)	no GO terms	no GO terms
[INTERPRO, BLASTED, MAPPED, ANNOTATED]	gene_ID_unitig15_11	A0A1A0HIZ9_9ASCOCytochrome c heme lyase OS=Metschnikowia bicuspidata bicuspidata NRRL YB-4993 GN=METBIDRAFT_30346 PE=3 SV=1	268	20	3.21158e-163	80.75	5	C:GO:0005758; F:GO:0046872; P:GO:0018063; F:GO:0004408; C:GO:0005743	C:mitochondrial intermembrane space; F:metal ion binding; P:cytochrome c-heme linkage; F:holocytochrome-c synthase activity; C:mitochondrial inner membrane	EC:4.4.1.17	Holocytochrome-c synthase	IPR000511 (PFAM); mobidb-lite (MOBIDB_LITE); IPR000511 (PANTHER); PTHR12743:SF4 (PANTHER); IPR000511 (PROSITE_PATTERNS); IPR000511 (PROSITE_PATTERNS)	C:GO:0005739; F:GO:0004408
[INTERPRO, BLASTED]	gene_ID_unitig15_12	A0A1L0BU72_9ASCOCIC11C00000005578 OS=	756	20	0	57.95	IPR011990 (G3DSA:1.25.40.GENE3D); G3DSA:3.30.2320.10 (GENE3D); mobidb-lite (MOBIDB_LITE)	F:GO:0005515	F:protein binding
[INTERPRO, BLASTED, MAPPED, ANNOTATED]	gene_ID_unitig15_13	A0A1L0BU83_9ASCOCIC11C00000001727 OS=	273	20	8.93555e-88	57.55	2	C:GO:0005783; C:GO:0044425	C:endoplasmic reticulum; C:membrane part	IPR019383 (PFAM); mobidb-lite (MOBIDB_LITE); PTHR13254:SF4 (PANTHER); PTHR13254 (PANTHER)	no GO terms	no GO terms
[INTERPRO, BLASTED, MAPPED, ANNOTATED]	gene_ID_unitig15_14	A0A1A0HJC5_9ASCOPseudouridine synthase (Fragment) OS=Metschnikowia bicuspidata bicuspidata NRRL YB-4993 GN=METBIDRAFT_18859 PE=3 SV=1	424	20	0	69.55	6	C:GO:0005634; F:GO:0003723; C:GO:0005739; F:GO:0009982; P:GO:1990481; P:GO:0006400	C:nucleus; F:RNA binding; C:mitochondrion; F:pseudouridine synthase activity; P:mRNA pseudouridine synthesis; P:tRNA modification	EC:5.4.99.12	tRNA pseudouridine(38-40) synthase	Coil (COILS); IPR002501 (PFAM); G3DSA:3.30.2350.10 (GENE3D); mobidb-lite (MOBIDB_LITE); IPR014780 (PANTHER); IPR014780 (HAMAP); IPR020103 (SUPERFAMILY)	P:GO:0001522; F:GO:0003723; P:GO:0009451; P:GO:0006396; F:GO:0009982
[INTERPRO, BLASTED, MAPPED]	gene_ID_unitig15_15	A0A1L0GF51_9ASCOCIC11C00000000467 OS=	371	20	2.77632e-152	65.45	3	P:GO:0008150; C:GO:0005575; F:GO:0003674	P:biological_process; C:cellular_component; F:molecular_function	no IPS match	no IPS match	no IPS match
[INTERPRO, BLASTED]	gene_ID_unitig15_16	A0A1L0CUV1_9ASCOCIC11C00000005903 OS=	196	20	1.41018e-71	58.7	mobidb-lite (MOBIDB_LITE); mobidb-lite (MOBIDB_LITE)	no GO terms	no GO terms
[INTERPRO, BLASTED, MAPPED, ANNOTATED]	gene_ID_unitig15_17	A0A1L0BH00_9ASCOCIC11C00000000609 OS=	162	20	5.30335e-72	67	2	F:GO:0016791; P:GO:0016311	F:phosphatase activity; P:dephosphorylation	EC:3.1.3.41	4-nitrophenylphosphatase	IPR002589 (SMART); G3DSA:3.40.220.10 (GENE3D); IPR002589 (PFAM); PTHR12521 (PANTHER); PTHR12521:SF1 (PANTHER); IPR002589 (PROSITE_PROFILES); cd02901 (CDD); SSF52949 (SUPERFAMILY)	no GO terms
[INTERPRO, BLASTED, MAPPED, ANNOTATED]	gene_ID_unitig15_18	A0A1L0BG25_9ASCOCIC11C00000000355 OS=	688	20	0	92.2	14	P:GO:0016559; C:GO:0000329; C:GO:0005770; P:GO:0060988; C:GO:0005794; C:GO:0005741; P:GO:0006897; P:GO:0006623; F:GO:0005525; C:GO:0005777; P:GO:0045053; F:GO:0003924; P:GO:0030036; C:GO:0030479	P:peroxisome fission; C:fungal-type vacuole membrane; C:late endosome; P:lipid tube assembly; C:Golgi apparatus; C:mitochondrial outer membrane; P:endocytosis; P:protein targeting to vacuole; F:GTP binding; C:peroxisome; P:protein retention in Golgi apparatus; F:GTPase activity; P:actin cytoskeleton organization; C:actin cortical patch	EC:3.6.1.15	Nucleoside-triphosphate phosphatase	IPR022812 (PRINTS); IPR003130 (SMART); IPR001401 (SMART); IPR000375 (PFAM); IPR022812 (PFAM); G3DSA:3.40.50.300 (GENE3D); IPR003130 (PFAM); mobidb-lite (MOBIDB_LITE); PTHR11566:SF123 (PANTHER); IPR022812 (PANTHER); IPR019762 (PROSITE_PATTERNS); IPR030381 (PROSITE_PROFILES); IPR020850 (PROSITE_PROFILES); cd08771 (CDD); IPR027417 (SUPERFAMILY)	F:GO:0005525; F:GO:0003924
[INTERPRO, BLASTED, MAPPED, ANNOTATED]	gene_ID_unitig15_19	A0A1L0D563_9ASCOCIC11C00000004681 OS=	456	20	0	70.95	3	F:GO:0005524; F:GO:0004674; P:GO:0006468	F:ATP binding; F:protein serine/threonine kinase activity; P:protein phosphorylation	EC:2.7.11	Transferring phosphorus-containing groups	IPR000719 (SMART); IPR000961 (SMART); G3DSA:1.10.510.10 (GENE3D); IPR000719 (PFAM); G3DSA:3.30.200.20 (GENE3D); PTHR24351 (PANTHER); PTHR24351:SF111 (PANTHER); IPR008271 (PROSITE_PATTERNS); IPR000961 (PROSITE_PROFILES); IPR000719 (PROSITE_PROFILES); cd05123 (CDD); IPR011009 (SUPERFAMILY)	F:GO:0005524; F:GO:0004672; P:GO:0006468; F:GO:0004674
[INTERPRO, BLASTED, MAPPED, ANNOTATED]	gene_ID_unitig15_20	A0A1A0HJB4_9ASCOS-adenosylmethionine decarboxylase OS=Metschnikowia bicuspidata bicuspidata NRRL YB-4993 GN=METBIDRAFT_35684 PE=4 SV=1	431	20	0	70.45	4	F:GO:0016829; P:GO:0006596; C:GO:0044424; P:GO:0097164	F:lyase activity; P:polyamine biosynthetic process; C:intracellular part; P:ammonium ion metabolic process	IPR016067 (G3DSA:3.60.90.GENE3D); IPR001985 (TIGRFAM); IPR001985 (PFAM); IPR001985 (PIRSF); mobidb-lite (MOBIDB_LITE); PTHR11570:SF8 (PANTHER); PTHR11570 (PANTHER); IPR018166 (PROSITE_PATTERNS); IPR016067 (SUPERFAMILY)	P:GO:0008295; P:GO:0006597; F:GO:0004014	P:spermidine biosynthetic process; P:spermine biosynthetic process; F:adenosylmethionine decarboxylase activity
[INTERPRO, BLASTED, MAPPED, ANNOTATED]	gene_ID_unitig15_21	A0A1A0HIZ8_9ASCOMitochondrial carrier OS=Metschnikowia bicuspidata bicuspidata NRRL YB-4993 GN=METBIDRAFT_37689 PE=3 SV=1	300	20	0	95.5	5	P:GO:0055085; C:GO:0016021; C:GO:0005743; C:GO:0005886; F:GO:0005215	P:transmembrane transport; C:integral component of membrane; C:mitochondrial inner membrane; C:plasma membrane; F:transporter activity	IPR002113 (PRINTS); IPR002067 (PRINTS); IPR018108 (PFAM); IPR023395 (G3DSA:1.50.40.GENE3D); PTHR24089 (PANTHER); PTHR24089:SF453 (PANTHER); IPR018108 (PROSITE_PROFILES); IPR018108 (PROSITE_PROFILES); IPR018108 (PROSITE_PROFILES); IPR023395 (SUPERFAMILY); TMhelix (TMHMM); TMhelix (TMHMM); TMhelix (TMHMM)	P:GO:0055085; P:GO:0006810; C:GO:0005743; F:GO:0005215	P:transmembrane transport; P:transport; C:mitochondrial inner membrane; F:transporter activity
[INTERPRO, BLASTED, MAPPED, ANNOTATED]	gene_ID_unitig15_23_partial	A0A1A0HIY4_9ASCOPhospholipid-transporting ATPase OS=Metschnikowia bicuspidata bicuspidata NRRL YB-4993 GN=METBIDRAFT_34674 PE=3 SV=1	123	20	1.16134e-62	78.9	7	F:GO:0000287; F:GO:0005524; P:GO:0045332; C:GO:0016021; F:GO:0004012; C:GO:0005622; C:GO:0005886	F:magnesium ion binding; F:ATP binding; P:phospholipid translocation; C:integral component of membrane; F:phospholipid-translocating ATPase activity; C:intracellular; C:plasma membrane	EC:3.6.1.3; EC:3.6.3.1; EC:3.6.1.15	Adenosinetriphosphatase; Phospholipid-translocating ATPase; Nucleoside-triphosphate phosphatase	IPR023299 (G3DSA:3.40.1110.GENE3D); IPR026871 (PTHR24092:PANTHER); IPR006539 (PANTHER)	F:GO:0000166; F:GO:0000287; F:GO:0005524; C:GO:0016021; P:GO:0015914; F:GO:0004012
[INTERPRO, NO-BLAST]	gene_ID_unitig19_1	---NA---	119	mobidb-lite (MOBIDB_LITE)	no GO terms	no GO terms
[INTERPRO, BLASTED, MAPPED, ANNOTATED]	gene_ID_unitig19_2	A0A1A0HHI8_9ASCOFAD NAD(P)-binding domain-containing OS=Metschnikowia bicuspidata bicuspidata NRRL YB-4993 GN=METBIDRAFT_34031 PE=4 SV=1	547	20	0	84.3	3	F:GO:0008137; P:GO:0055114; C:GO:0005886	F:NADH dehydrogenase (ubiquinone) activity; P:oxidation-reduction process; C:plasma membrane	EC:1.6.99.5; EC:1.6.99.3; EC:1.6.5.3	Acting on NADH or NADPH; NADH dehydrogenase; NADH:ubiquinone reductase (H(+)-translocating)	PR00368 (PRINTS); IPR023753 (PFAM); IPR023753 (G3DSA:3.50.50.GENE3D); IPR023753 (G3DSA:3.50.50.GENE3D); PTHR43706 (PANTHER); PTHR43706:SF11 (PANTHER); IPR023753 (SUPERFAMILY); IPR023753 (SUPERFAMILY)	F:GO:0016491; P:GO:0055114
[INTERPRO, BLASTED, MAPPED]	gene_ID_unitig19_3	A0A1L0DY69_9ASCOCIC11C00000005712 OS=	181	20	1.25942e-77	63.75	1	F:GO:0003674	F:molecular_function	Coil (COILS); IPR009851 (PFAM); PTHR13678 (PANTHER); PTHR13678:SF14 (PANTHER); IPR009851 (PROSITE_PROFILES); SSF140111 (SUPERFAMILY)	no GO terms	no GO terms
[INTERPRO, BLASTED, MAPPED, ANNOTATED]	gene_ID_unitig19_4	A0A1A0HI03_9ASCOMFS _	general substrate transporter OS=Metschnikowia bicuspidata bicuspidata NRRL YB-4993 GN=METBIDRAFT_76487 PE=4 SV=1	615	20	0	71.05	2	P:GO:0055085; C:GO:0016021	P:transmembrane transport; C:integral component of membrane	Coil (COILS); Coil (COILS); IPR011701 (PFAM); G3DSA:1.20.1250.20 (GENE3D); G3DSA:1.20.1250.20 (GENE3D); mobidb-lite (MOBIDB_LITE); PTHR23502:SF112 (PANTHER); PTHR23502 (PANTHER); IPR020846 (PROSITE_PROFILES); IPR020846 (CDD); IPR020846 (SUPERFAMILY); TMhelix (TMHMM); TMhelix (TMHMM); TMhelix (TMHMM); TMhelix (TMHMM); TMhelix (TMHMM); TMhelix (TMHMM); TMhelix (TMHMM); TMhelix (TMHMM); TMhelix (TMH…	P:GO:0055085; C:GO:0016021	P:transmembrane transport; C:integral component of membrane
[INTERPRO, BLASTED, MAPPED]	gene_ID_unitig19_5	A0A1L0C383_9ASCOCIC11C00000001993 OS=	882	20	0	62.85	3	F:GO:0003677; P:GO:0000083; C:GO:0030907	F:DNA binding; P:regulation of transcription involved in G1/S transition of mitotic cell cycle; C:MBF transcription complex	IPR002110 (SMART); IPR018004 (SMART); IPR018004 (PFAM); IPR003163 (G3DSA:3.10.260.GENE3D); IPR020683 (G3DSA:1.25.40.GENE3D); mobidb-lite (MOBIDB_LITE); mobidb-lite (MOBIDB_LITE); PTHR43828 (PANTHER); IPR029793 (PTHR43828:PANTHER); IPR003163 (PROSITE_PROFILES); IPR020683 (PROSITE_PROFILES); cd00204 (CDD); IPR020683 (SUPERFAMILY); IPR003163 (SUPERFAMILY)	F:GO:0003677; F:GO:0005515; P:GO:0000083; C:GO:0030907	F:DNA binding; F:protein binding; P:regulation of transcription involved in G1/S transition of mitotic cell cycle; C:MBF transcription complex
[INTERPRO, BLASTED, MAPPED, ANNOTATED]	gene_ID_unitig19_6	A0A1L0C0N7_9ASCOCIC11C00000002675 OS=	311	20	6.51417e-124	64.2	1	C:GO:0005886	C:plasma membrane	TMhelix (TMHMM)	no GO terms	no GO terms
[INTERPRO, BLASTED, MAPPED]	gene_ID_unitig19_7	A0A1L0DY61_9ASCOCIC11C00000004783 OS=	361	20	3.50321e-107	56.9	5	P:GO:0008150; C:GO:0016020; C:GO:0016021; C:GO:0005575; F:GO:0003674	P:biological_process; C:membrane; C:integral component of membrane; C:cellular_component; F:molecular_function	IPR019273 (PFAM); mobidb-lite (MOBIDB_LITE); mobidb-lite (MOBIDB_LITE); PTHR22166:SF20 (PANTHER); PTHR22166 (PANTHER); TMhelix (TMHMM); TMhelix (TMHMM)	no GO terms	no GO terms
[INTERPRO, BLASTED, MAPPED, ANNOTATED]	gene_ID_unitig19_8	A0A1A0HHX0_9ASCONascent polypeptide-associated complex subunit alpha OS=Metschnikowia bicuspidata bicuspidata NRRL YB-4993 GN=METBIDRAFT_29931 PE=4 SV=1	174	20	2.92529e-92	83.4	10	C:GO:0005634; C:GO:0005854; F:GO:0070273; F:GO:0080025; F:GO:0051082; F:GO:0070300; F:GO:0032266; P:GO:0051083; P:GO:0006620; C:GO:0009986	C:nucleus; C:nascent polypeptide-associated complex; F:phosphatidylinositol-4-phosphate binding; F:phosphatidylinositol-3,5-bisphosphate binding; F:unfolded protein binding; F:phosphatidic acid binding; F:phosphatidylinositol-3-phosphate binding; P:'de novo' cotranslational protein folding; P:posttranslational protein targeting to membrane; C:cell surface	IPR002715 (SMART); IPR002715 (PFAM); G3DSA:1.10.8.10 (GENE3D); IPR016641 (PIRSF); mobidb-lite (MOBIDB_LITE); IPR016641 (PANTHER); IPR002715 (PROSITE_PROFILES)	C:GO:0005854	C:nascent polypeptide-associated complex
[INTERPRO, NO-BLAST]	gene_ID_unitig19_9	---NA---	264	Coil (COILS); mobidb-lite (MOBIDB_LITE)	no GO terms	no GO terms
[INTERPRO, BLASTED, MAPPED, ANNOTATED]	gene_ID_unitig19_10	A0A1A0HI09_9ASCOPhospholipid-transporting ATPase OS=Metschnikowia bicuspidata bicuspidata NRRL YB-4993 GN=METBIDRAFT_76492 PE=3 SV=1	1493	20	0	80.2	5	F:GO:0000287; F:GO:0005524; P:GO:0045332; C:GO:0016021; F:GO:0004012	F:magnesium ion binding; F:ATP binding; P:phospholipid translocation; C:integral component of membrane; F:phospholipid-translocating ATPase activity	EC:3.6.1.3; EC:3.6.3.1; EC:3.6.1.15	Adenosinetriphosphatase; Phospholipid-translocating ATPase; Nucleoside-triphosphate phosphatase	PR00119 (PRINTS); PF00122 (PFAM); IPR001757 (TIGRFAM); PF13246 (PFAM); G3DSA:1.20.1110.10 (GENE3D); IPR032630 (PFAM); G3DSA:2.70.150.10 (GENE3D); IPR032631 (PFAM); IPR006539 (TIGRFAM); IPR023299 (G3DSA:3.40.1110.GENE3D); mobidb-lite (MOBIDB_LITE); mobidb-lite (MOBIDB_LITE); IPR026871 (PTHR24092:PANTHER); IPR006539 (PANTHER); IPR018303 (PROSITE_PATTERNS); IPR008250 (SUPERFAMILY); IPR023298 (SUPERF…	F:GO:0000287; F:GO:0000166; F:GO:0005524; C:GO:0016021; P:GO:0015914; F:GO:0004012
[INTERPRO, BLASTED, MAPPED, ANNOTATED]	gene_ID_unitig19_11	A0A1L0DN08_9ASCOCIC11C00000000310 OS=	1007	20	0	68.8	2	P:GO:0016071; C:GO:0005849	P:mRNA metabolic process; C:mRNA cleavage factor complex	IPR022712 (SMART); IPR025069 (PFAM); IPR001279 (PFAM); IPR001279 (G3DSA:3.60.15.GENE3D); IPR022712 (PFAM); mobidb-lite (MOBIDB_LITE); mobidb-lite (MOBIDB_LITE); PTHR11203 (PANTHER); IPR027075 (PTHR11203:PANTHER); IPR001279 (SUPERFAMILY)	C:GO:0005847; P:GO:0006378; P:GO:0006379	C:mRNA cleavage and polyadenylation specificity factor complex; P:mRNA polyadenylation; P:mRNA cleavage
[INTERPRO, BLASTED, MAPPED, ANNOTATED]	gene_ID_unitig19_12	A0A1A0HHJ8_9ASCONucleolar complex-associated 3 OS=Metschnikowia bicuspidata bicuspidata NRRL YB-4993 GN=METBIDRAFT_76495 PE=4 SV=1	695	20	0	74.95	8	C:GO:0005656; P:GO:0006270; C:GO:0030691; C:GO:0016020; P:GO:0006267; F:GO:0003682; P:GO:0006364; C:GO:0005730	C:nuclear pre-replicative complex; P:DNA replication initiation; C:Noc2p-Noc3p complex; C:membrane; P:pre-replicative complex assembly involved in nuclear cell cycle DNA replication; F:chromatin binding; P:rRNA processing; C:nucleolus	Coil (COILS); IPR005612 (PFAM); IPR016903 (PIRSF); IPR011501 (PFAM); mobidb-lite (MOBIDB_LITE); mobidb-lite (MOBIDB_LITE); PTHR14428:SF6 (PANTHER); PTHR14428 (PANTHER)	no GO terms	no GO terms
[INTERPRO, BLASTED, MAPPED, ANNOTATED]	gene_ID_unitig19_13	A0A1A0HI14_9ASCO6-phosphogluconate decarboxylating OS=Metschnikowia bicuspidata bicuspidata NRRL YB-4993 GN=METBIDRAFT_106293 PE=3 SV=1	494	20	0	93.5	5	F:GO:0050661; P:GO:0009051; F:GO:0004616; C:GO:0005829; P:GO:0055114	F:NADP binding; P:pentose-phosphate shunt, oxidative branch; F:phosphogluconate dehydrogenase (decarboxylating) activity; C:cytosol; P:oxidation-reduction process	EC:1.1.1.44	Phosphogluconate dehydrogenase (NADP(+)-dependent, decarboxylating)	IPR006183 (PRINTS); IPR006114 (SMART); IPR013328 (G3DSA:1.10.1040.GENE3D); IPR006113 (TIGRFAM); IPR006114 (PFAM); IPR006113 (PIRSF); G3DSA:3.40.50.720 (GENE3D); G3DSA:1.20.5.320 (GENE3D); IPR006115 (PFAM); PTHR11811 (PANTHER); PTHR11811:SF40 (PANTHER); IPR006184 (PROSITE_PATTERNS); IPR008927 (SUPERFAMILY); IPR016040 (SUPERFAMILY)	F:GO:0004616; P:GO:0006098; F:GO:0016491; P:GO:0055114
[INTERPRO, BLASTED, MAPPED, ANNOTATED]	gene_ID_unitig19_14	A0A1A0HHX5_9ASCOCytochrome P450 OS=Metschnikowia bicuspidata bicuspidata NRRL YB-4993 GN=METBIDRAFT_76496 PE=3 SV=1	522	20	0	87.25	15	P:GO:0036180; P:GO:0006696; P:GO:0036170; C:GO:0005783; F:GO:0000249; P:GO:0009267; P:GO:0006897; P:GO:0006623; C:GO:0005886; F:GO:0020037; F:GO:0005506; F:GO:0070330; P:GO:0071210; C:GO:0016021; P:GO:0055114	P:filamentous growth of a population of unicellular organisms in response to biotic stimulus; P:ergosterol biosynthetic process; P:filamentous growth of a population of unicellular organisms in response to starvation; C:endoplasmic reticulum; F:C-22 sterol desaturase activity; P:cellular response to starvation; P:endocytosis; P:protein targeting to vacuole; C:plasma membrane; F:heme binding; F:ir…	EC:1.14.14.1; EC:1.14.14; EC:1.14.19	Unspecific monooxygenase; Acting on paired donors, with incorporation or reduction of molecular oxygen. The oxygen incorporated need not be derived from O(2); Acting on paired donors, with incorporation or reduction of molecular oxygen. The oxygen incorporated need not be derived from O(2)	IPR002403 (PRINTS); IPR001128 (PFAM); G3DSA:1.10.630.10 (GENE3D); PTHR24286 (PANTHER); PTHR24286:SF111 (PANTHER); IPR017972 (PROSITE_PATTERNS); IPR001128 (SUPERFAMILY)	F:GO:0005506; F:GO:0016705; P:GO:0055114; F:GO:0004497; F:GO:0020037
[INTERPRO, BLASTED, MAPPED, ANNOTATED]	gene_ID_unitig19_15	A0A1A0HH30_9ASCOSulfate adenylyltransferase OS=Metschnikowia bicuspidata bicuspidata NRRL YB-4993 GN=MET3 PE=3 SV=1	528	20	0	83.1	7	P:GO:0009086; F:GO:0005524; P:GO:0070814; C:GO:0005739; P:GO:0019344; P:GO:0019379; F:GO:0004781	P:methionine biosynthetic process; F:ATP binding; P:hydrogen sulfide biosynthetic process; C:mitochondrion; P:cysteine biosynthetic process; P:sulfate assimilation, phosphoadenylyl sulfate reduction by phosphoadenylyl-sulfate reductase (thioredoxin); F:sulfate adenylyltransferase (ATP) activity	EC:2.7.7.4	Sulfate adenylyltransferase	IPR014729 (G3DSA:3.40.50.GENE3D); IPR024951 (PFAM); IPR002650 (TIGRFAM); IPR025980 (PFAM); G3DSA:3.10.400.10 (GENE3D); PTHR42700 (PANTHER); IPR027535 (HAMAP); IPR002650 (CDD); IPR027417 (SUPERFAMILY); SSF52374 (SUPERFAMILY); IPR015947 (SUPERFAMILY)	P:GO:0000096; F:GO:0004781; P:GO:0000103
[INTERPRO, BLASTED, MAPPED, ANNOTATED]	gene_ID_unitig19_16	A0A1L0DCA2_9ASCOCIC11C00000003885 OS=	86	14	1.80365e-34	67.93	1	C:GO:0016020	C:membrane	Coil (COILS); mobidb-lite (MOBIDB_LITE); TMhelix (TMHMM)	no GO terms	no GO terms
[INTERPRO, BLASTED, MAPPED, ANNOTATED]	gene_ID_unitig19_17	A0A1A0HHK3_9ASCOSPRY-domain-containing OS=Metschnikowia bicuspidata bicuspidata NRRL YB-4993 GN=METBIDRAFT_85705 PE=4 SV=1	398	20	0	77.65	6	P:GO:0043328; P:GO:0016192; C:GO:0016021; C:GO:0010008; C:GO:0000324; C:GO:0005774	P:protein targeting to vacuole involved in ubiquitin-dependent protein catabolic process via the multivesicular body sorting pathway; P:vesicle-mediated transport; C:integral component of membrane; C:endosome membrane; C:fungal-type vacuole; C:vacuolar membrane	IPR003877 (SMART); IPR003877 (PFAM); PTHR12864 (PANTHER); PTHR12864:SF34 (PANTHER); IPR001870 (PROSITE_PROFILES); cd12910 (CDD); IPR013320 (SUPERFAMILY); TMhelix (TMHMM)	F:GO:0005515	F:protein binding
[INTERPRO, BLASTED]	gene_ID_unitig19_18	Q6BYN0_DEBHADEHA2A08294p OS=Debaryomyces hansenii (strain ATCC 36239 CBS 767 JCM 1990 NBRC 0083 IGC 2968) GN=DEHA2A08294g PE=4 SV=2	321	16	1.97581e-144	50.56	mobidb-lite (MOBIDB_LITE)	no GO terms	no GO terms
[INTERPRO, BLASTED, MAPPED, ANNOTATED]	gene_ID_unitig19_19	A0A1A0HHY0_9ASCOMagnesium-dependent phosphatase-1 OS=Metschnikowia bicuspidata bicuspidata NRRL YB-4993 GN=METBIDRAFT_35704 PE=4 SV=1	175	20	2.84496e-108	72.35	2	F:GO:0016791; P:GO:0016311	F:phosphatase activity; P:dephosphorylation	EC:3.1.3.41	4-nitrophenylphosphatase	IPR010036 (PFAM); IPR010036 (TIGRFAM); IPR010033 (TIGRFAM); IPR023214 (G3DSA:3.40.50.GENE3D); PTHR17901:SF17 (PANTHER); IPR010036 (PANTHER); IPR023214 (SUPERFAMILY)	F:GO:0016791
[INTERPRO, BLASTED, MAPPED]	gene_ID_unitig19_20	A0A1L0BTG9_9ASCOCIC11C00000001857 OS=	578	20	1.56904e-161	51.25	1	F:GO:0008270	F:zinc ion binding	Coil (COILS); IPR000433 (SMART); IPR000433 (PFAM); mobidb-lite (MOBIDB_LITE); PTHR12268 (PANTHER); PTHR12268:SF18 (PANTHER); IPR000433 (PROSITE_PROFILES); cd02249 (CDD); SSF57850 (SUPERFAMILY)	F:GO:0008270	F:zinc ion binding
[INTERPRO, BLASTED, MAPPED, ANNOTATED]	gene_ID_unitig19_21	A0A1A0HHK8_9ASCOHMG-box OS=Metschnikowia bicuspidata bicuspidata NRRL YB-4993 GN=METBIDRAFT_29942 PE=4 SV=1	289	20	4.56762e-86	62.7	2	F:GO:0003677; P:GO:0009987	F:DNA binding; P:cellular process	Coil (COILS); Coil (COILS); IPR009071 (SMART); IPR009071 (G3DSA:1.10.30.GENE3D); IPR009071 (PFAM); mobidb-lite (MOBIDB_LITE); PTHR13711 (PANTHER); IPR009071 (PROSITE_PROFILES); cd01390 (CDD); IPR009071 (SUPERFAMILY)	no GO terms	no GO terms
[INTERPRO, BLASTED, MAPPED, ANNOTATED]	gene_ID_unitig19_22	A0A1L0BQ65_9ASCOCIC11C00000003931 OS=	2518	20	0	62.8	4	C:GO:0005634; P:GO:0000462; C:GO:0030684; P:GO:0000479	C:nucleus; P:maturation of SSU-rRNA from tricistronic rRNA transcript (SSU-rRNA, 5.8S rRNA, LSU-rRNA); C:preribosome; P:endonucleolytic cleavage of tricistronic rRNA transcript (SSU-rRNA, 5.8S rRNA, LSU-rRNA)	Coil (COILS); IPR011989 (G3DSA:1.25.10.GENE3D); IPR011989 (G3DSA:1.25.10.GENE3D); IPR011430 (PFAM); IPR011989 (G3DSA:1.25.10.GENE3D); mobidb-lite (MOBIDB_LITE); PTHR17695:SF12 (PANTHER); PTHR17695 (PANTHER); IPR016024 (SUPERFAMILY); IPR016024 (SUPERFAMILY); IPR016024 (SUPERFAMILY)	F:GO:0005488	F:binding
[INTERPRO, BLASTED, MAPPED, ANNOTATED]	gene_ID_unitig19_23	A0A1L0E1E5_9ASCOCIC11C00000000679 OS=	407	20	0	86.1	1	C:GO:0016021	C:integral component of membrane	Coil (COILS); IPR003734 (PFAM); mobidb-lite (MOBIDB_LITE); PTHR16255:SF14 (PANTHER); PTHR16255 (PANTHER); TMhelix (TMHMM)	no GO terms	no GO terms
[INTERPRO, BLASTED, MAPPED]	gene_ID_unitig19_24	A0A1L0GQR4_9ASCOCIC11C00000005545 OS=	515	20	9.7857e-93	65.25	2	C:GO:0005634; P:GO:0075307	C:nucleus; P:positive regulation of conidium formation	mobidb-lite (MOBIDB_LITE); PTHR39463 (PANTHER)	no GO terms	no GO terms
[INTERPRO, BLASTED, MAPPED]	gene_ID_unitig19_25	A0A1A0HHY9_9ASCOAltered inheritance of mitochondria mitochondrial OS=Metschnikowia bicuspidata bicuspidata NRRL YB-4993 GN=METBIDRAFT_106434 PE=3 SV=1	410	20	0	56.7	4	C:GO:0031305; C:GO:0005739; P:GO:0007007; F:GO:0003674	C:integral component of mitochondrial inner membrane; C:mitochondrion; P:inner mitochondrial membrane organization; F:molecular_function	IPR002838 (G3DSA:3.60.160.GENE3D); IPR002838 (PFAM); PTHR36959 (PANTHER); PTHR36959:SF3 (PANTHER)	no GO terms	no GO terms
[INTERPRO, BLASTED, MAPPED, ANNOTATED]	gene_ID_unitig19_26	A0A1A0HI28_9ASCOPhosphatidylinositol-4-phosphate 5-kinase OS=Metschnikowia bicuspidata bicuspidata NRRL YB-4993 GN=METBIDRAFT_35886 PE=4 SV=1	642	20	0	79.55	5	C:GO:0005634; F:GO:0016308; P:GO:0031321; P:GO:0046854; C:GO:0005886	C:nucleus; F:-1phosphatidylinositol-4-phosphate 5-kinase activity; P:ascospore-type prospore assembly; P:phosphatidylinositol phosphorylation; C:plasma membrane	EC:2.7.1.68	-1phosphatidylinositol-4-phosphate 5-kinase	IPR002498 (SMART); IPR002498 (PFAM); IPR027483 (G3DSA:3.30.810.GENE3D); IPR027484 (G3DSA:3.30.800.GENE3D); mobidb-lite (MOBIDB_LITE); IPR023610 (PANTHER); PTHR23086:SF64 (PANTHER); IPR002498 (PROSITE_PROFILES); SSF56104 (SUPERFAMILY)	F:GO:0016307; P:GO:0046488
[INTERPRO, BLASTED, MAPPED, ANNOTATED]	gene_ID_unitig19_27	A0A1A0HHL8_9ASCOSucraseferredoxin OS=Metschnikowia bicuspidata bicuspidata NRRL YB-4993 GN=METBIDRAFT_34915 PE=4 SV=1	565	20	1.88547e-177	74.05	1	C:GO:0005737	C:cytoplasm	IPR009737 (PFAM); G3DSA:3.40.30.10 (GENE3D); IPR030108 (PTHR31902:PANTHER); PTHR31902 (PANTHER); IPR009737 (CDD); IPR012336 (SUPERFAMILY)	no GO terms	no GO terms
[INTERPRO, BLASTED, MAPPED, ANNOTATED]	gene_ID_unitig19_28	A0A1A0HHL9_9ASCOThioredoxin OS=Metschnikowia bicuspidata bicuspidata NRRL YB-4993 GN=METBIDRAFT_29952 PE=4 SV=1	390	20	0	63.35	1	C:GO:0005623	C:cell	Coil (COILS); G3DSA:3.40.30.10 (GENE3D); IPR011679 (G3DSA:1.20.1150.GENE3D); IPR011679 (PFAM); IPR013766 (PFAM); G3DSA:3.40.30.10 (GENE3D),SFLDG00345 (SFLD); PTHR18929 (PANTHER); IPR013766 (PROSITE_PROFILES); IPR013766 (PROSITE_PROFILES); IPR011679 (SUPERFAMILY); IPR012336 (SUPERFAMILY); IPR012336 (SUPERFAMILY)	C:GO:0005783; P:GO:0045454	C:endoplasmic reticulum; P:cell redox homeostasis
[INTERPRO, BLASTED]	gene_ID_unitig19_29	A0A1A0HHZ4_9ASCOGlutaredoxin OS=Metschnikowia bicuspidata bicuspidata NRRL YB-4993 GN=METBIDRAFT_36122 PE=3 SV=1	107	20	1.79181e-52	71.1	IPR008554 (PFAM); G3DSA:3.40.30.10 (GENE3D); PTHR33558 (PANTHER); PTHR33558:SF2 (PANTHER); IPR012336 (SUPERFAMILY)	no GO terms	no GO terms
[INTERPRO, BLASTED]	gene_ID_unitig19_30	A0A1A0HI33_9ASCOUncharacterized protein OS=Metschnikowia bicuspidata var. bicuspidata NRRL YB-4993 GN=METBIDRAFT_9761 PE=4 SV=1	131	2	1.20752e-20	63	no IPS match	no IPS match	no IPS match
[INTERPRO, BLASTED, MAPPED, ANNOTATED]	gene_ID_unitig19_31	A0A1A0HK00_9ASCO OS=Metschnikowia bicuspidata bicuspidata NRRL YB-4993 GN=METBIDRAFT_77052 PE=3 SV=1	365	20	0	80.3	3	F:GO:0008270; P:GO:0055114; F:GO:0008106	F:zinc ion binding; P:oxidation-reduction process; F:alcohol dehydrogenase (NADP+) activity	EC:1.1.1.2	Alcohol dehydrogenase (NADP(+))	IPR020843 (SMART); G3DSA:3.90.180.10 (GENE3D); IPR013154 (PFAM); G3DSA:3.40.50.20 (GENE3D); IPR013149 (PFAM); PTHR42683 (PANTHER); PTHR42683:SF7 (PANTHER); IPR002328 (PROSITE_PATTERNS); IPR029752 (PROSITE_PATTERNS); cd05283 (CDD); IPR016040 (SUPERFAMILY); IPR011032 (SUPERFAMILY)	F:GO:0008270; F:GO:0016491; P:GO:0055114
[INTERPRO, BLASTED, MAPPED, ANNOTATED]	gene_ID_unitig19_32	A0A1A0HHM3_9ASCONAD(P)-binding OS=Metschnikowia bicuspidata bicuspidata NRRL YB-4993 GN=METBIDRAFT_80941 PE=4 SV=1	290	20	5.00937e-169	77.15	8	C:GO:0005811; F:GO:0000140; F:GO:0004806; C:GO:0005783; P:GO:0055114; P:GO:0019433; C:GO:0005741; P:GO:0006654	C:lipid particle; F:acylglycerone-phosphate reductase activity; F:triglyceride lipase activity; C:endoplasmic reticulum; P:oxidation-reduction process; P:triglyceride catabolic process; C:mitochondrial outer membrane; P:phosphatidic acid biosynthetic process	EC:1.1.1.101; EC:3.1.1.1; EC:3.1.1.3	Acylglycerone-phosphate reductase; Carboxylesterase; Triacylglycerol lipase	IPR002347 (PRINTS); IPR002347 (PFAM); G3DSA:3.40.50.720 (GENE3D); PTHR43490:SF3 (PANTHER); PTHR43490 (PANTHER); IPR020904 (PROSITE_PATTERNS); cd05374 (CDD); IPR016040 (SUPERFAMILY)	F:GO:0016491
[INTERPRO, BLASTED, MAPPED, ANNOTATED]	gene_ID_unitig19_33	A0A1A0HHM5_9ASCONAD(P)-binding OS=Metschnikowia bicuspidata bicuspidata NRRL YB-4993 GN=METBIDRAFT_76510 PE=4 SV=1	405	20	0	67.7	2	F:GO:0016491; P:GO:0055114	F:oxidoreductase activity; P:oxidation-reduction process	G3DSA:3.40.50.720 (GENE3D); IPR004104 (PFAM); IPR000683 (PFAM); G3DSA:3.30.360.10 (GENE3D); PTHR43377 (PANTHER); PTHR43377:SF3 (PANTHER); SSF55347 (SUPERFAMILY); IPR016040 (SUPERFAMILY)	F:GO:0016491; P:GO:0008152; P:GO:0055114	F:oxidoreductase activity; P:metabolic process; P:oxidation-reduction process
[INTERPRO, BLASTED, MAPPED]	gene_ID_unitig19_34	A0A1A0HHZ9_9ASCODUF676-domain-containing OS=Metschnikowia bicuspidata bicuspidata NRRL YB-4993 GN=METBIDRAFT_36681 PE=4 SV=1	686	20	0	64.9	4	P:GO:0008150; C:GO:0005575; F:GO:0003674; F:GO:0016787	P:biological_process; C:cellular_component; F:molecular_function; F:hydrolase activity	IPR007751 (PFAM); IPR029058 (G3DSA:3.40.50.GENE3D); IPR016445 (PIRSF); mobidb-lite (MOBIDB_LITE); PTHR12482 (PANTHER); PTHR12482:SF28 (PANTHER); IPR029058 (SUPERFAMILY)	no GO terms	no GO terms
[INTERPRO, NO-BLAST]	gene_ID_unitig19_35	---NA---	156	no IPS match	no IPS match	no IPS match
[INTERPRO, BLASTED, MAPPED, ANNOTATED]	gene_ID_unitig19_36	A0A1L0E1D0_9ASCOCIC11C00000001966 OS=	858	20	0	50.15	3	P:GO:1901360; F:GO:0003824; P:GO:0019752	P:organic cyclic compound metabolic process; F:catalytic activity; P:carboxylic acid metabolic process	G3DSA:3.40.50.720 (GENE3D); IPR013708 (PFAM); IPR006151 (PFAM); IPR013785 (G3DSA:3.20.20.GENE3D); G3DSA:3.40.50.300 (GENE3D); IPR031322 (PFAM); IPR001381 (PFAM); G3DSA:3.40.50.10860 (GENE3D); PTHR21090:SF24 (PANTHER); PTHR21090 (PANTHER); cd01065 (CDD); SSF53223 (SUPERFAMILY); IPR016040 (SUPERFAMILY); IPR027417 (SUPERFAMILY)	F:GO:0003855; F:GO:0003824; P:GO:0055114; F:GO:0004764	F:3-dehydroquinate dehydratase activity; F:catalytic activity; P:oxidation-reduction process; F:shikimate 3-dehydrogenase (NADP+) activity
[INTERPRO, BLASTED, MAPPED, ANNOTATED]	gene_ID_unitig19_37	A0A1L0BQF7_9ASCOCIC11C00000001199 OS=	448	20	0	71.4	4	C:GO:0016020; C:GO:0005829; P:GO:0019336; F:GO:0018678	C:membrane; C:cytosol; P:phenol-containing compound catabolic process; F:4-hydroxybenzoate -1hydroxylase activity	EC:1.14.13; EC:1.14.13.64	Acting on paired donors, with incorporation or reduction of molecular oxygen. The oxygen incorporated need not be derived from O(2); 4-hydroxybenzoate -1hydroxylase	PR00420 (PRINTS); IPR023753 (G3DSA:3.50.50.GENE3D); IPR002938 (PFAM); PTHR13789 (PANTHER); PTHR13789:SF283 (PANTHER); SSF54373 (SUPERFAMILY); IPR023753 (SUPERFAMILY); TMhelix (TMHMM)	F:GO:0071949; F:GO:0016491; P:GO:0055114
[INTERPRO, BLASTED, MAPPED, ANNOTATED]	gene_ID_unitig19_38	A0A1A0HH53_9ASCO2-oxoglutarate E1 component OS=Metschnikowia bicuspidata bicuspidata NRRL YB-4993 GN=METBIDRAFT_76512 PE=4 SV=1	1002	20	0	90.95	3	F:GO:0030976; F:GO:0004591; P:GO:0006099	F:thiamine pyrophosphate binding; F:oxoglutarate dehydrogenase (succinyl-transferring) activity; P:tricarboxylic acid cycle	EC:1.2.4.2	Oxoglutarate dehydrogenase (succinyl-transferring)	IPR005475 (SMART); IPR011603 (TIGRFAM); IPR031717 (PFAM); G3DSA:1.10.287.1150 (GENE3D); IPR001017 (PFAM); G3DSA:3.40.50.970 (GENE3D); IPR011603 (PIRSF); G3DSA:3.40.50.970 (GENE3D); IPR005475 (PFAM); IPR032106 (PFAM); PTHR23152:SF12 (PANTHER); IPR011603 (PANTHER); cd02016 (CDD); IPR029061 (SUPERFAMILY); IPR029061 (SUPERFAMILY)	F:GO:0030976; F:GO:0016624; F:GO:0004591; P:GO:0008152; P:GO:0006099; P:GO:0055114
[INTERPRO, NO-BLAST]	gene_ID_unitig19_39	---NA---	291	mobidb-lite (MOBIDB_LITE)	no GO terms	no GO terms
[INTERPRO, BLASTED, MAPPED, ANNOTATED]	gene_ID_unitig19_40	A0A1A0HHM8_9ASCOPresequence translocated-associated motor subunit mitochondrial OS=Metschnikowia bicuspidata bicuspidata NRRL YB-4993 GN=METBIDRAFT_29957 PE=4 SV=1	180	20	2.02818e-100	76.25	4	P:GO:0030150; C:GO:0016021; C:GO:0001405; C:GO:0005886	P:protein import into mitochondrial matrix; C:integral component of membrane; C:presequence translocase-associated import motor; C:plasma membrane	IPR013875 (PFAM); PTHR28021 (PANTHER); PTHR28021:SF2 (PANTHER); TMhelix (TMHMM); TMhelix (TMHMM)	no GO terms	no GO terms
[INTERPRO, BLASTED, MAPPED, ANNOTATED]	gene_ID_unitig19_41	A0A1L0BQG2_9ASCOCIC11C00000001653 OS=	1271	20	0	77.05	18	P:GO:0061587; P:GO:0006284; P:GO:0007010; P:GO:0007059; F:GO:0004386; C:GO:0000775; P:GO:0006337; P:GO:0007126; P:GO:0006302; P:GO:0006368; F:GO:0005524; P:GO:0000086; P:GO:0043044; F:GO:0070577; F:GO:0015616; P:GO:0016584; P:GO:0031055; C:GO:0016586	P:transfer RNA _	gene-mediated silencing; P:base-excision repair; P:cytoskeleton organization; P:chromosome segregation; F:helicase activity; C:chromosome, centromeric region; P:nucleosome disassembly; P:meiotic nuclear division; P:double-strand break repair; P:transcription elongation from RNA polymerase II promoter; F:ATP binding; P:G2/M transition of mitotic cell cycle; P:ATP-dependent chromatin remodeling; F:…	EC:3.6.1.3; EC:3.6.1.15	Adenosinetriphosphatase; Nucleoside-triphosphate phosphatase	Coil (COILS); Coil (COILS); Coil (COILS); IPR001487 (PRINTS); IPR001650 (SMART); IPR001487 (SMART); IPR029295 (SMART); IPR014001 (SMART); IPR000330 (PFAM); IPR029295 (PFAM); IPR014012 (PFAM); G3DSA:3.40.50.300 (GENE3D); G3DSA:3.40.50.10810 (GENE3D); IPR001650 (PFAM); IPR001487 (PFAM); IPR001487 (G3DSA:1.20.920.GENE3D); mobidb-lite (MOBIDB_LITE); PTHR10799:SF799 (PANTHER); PTHR10799 (PANTHER); IPR…
[INTERPRO, BLASTED, MAPPED, ANNOTATED]	gene_ID_unitig19_42	A0A1A0HAQ6_9ASCOAmino acid transporter OS=Metschnikowia bicuspidata bicuspidata NRRL YB-4993 GN=METBIDRAFT_78069 PE=4 SV=1	561	20	0	77.55	3	C:GO:0016021; F:GO:0015171; P:GO:0003333	C:integral component of membrane; F:amino acid transmembrane transporter activity; P:amino acid transmembrane transport	IPR002293 (PFAM); IPR002293 (PIRSF); PTHR11785:SF471 (PANTHER); PTHR11785 (PANTHER); TMhelix (TMHMM); TMhelix (TMHMM); TMhelix (TMHMM); TMhelix (TMHMM); TMhelix (TMHMM); TMhelix (TMHMM); TMhelix (TMHMM); TMhelix (TMHMM); TMhelix (TMHMM); TMhelix (TMHMM); TMhelix (TMHMM)	C:GO:0016020; F:GO:0015171; P:GO:0003333	C:membrane; F:amino acid transmembrane transporter activity; P:amino acid transmembrane transport
[INTERPRO, BLASTED, MAPPED, ANNOTATED]	gene_ID_unitig19_43	A0A1A0HI04_9ASCORibosomal L6 OS=Metschnikowia bicuspidata bicuspidata NRRL YB-4993 GN=METBIDRAFT_64312 PE=4 SV=1	191	20	4.12589e-131	93.15	4	F:GO:0003735; C:GO:0005840; F:GO:0019843; P:GO:0006412	F:structural constituent of ribosome; C:ribosome; F:rRNA binding; P:translation	IPR020040 (G3DSA:3.90.930.GENE3D); IPR000702 (PIRSF); IPR020040 (PFAM); IPR020040 (G3DSA:3.90.930.GENE3D); PTHR11655:SF20 (PANTHER); IPR000702 (PANTHER); IPR002359 (PROSITE_PATTERNS); IPR020040 (SUPERFAMILY); IPR020040 (SUPERFAMILY)	F:GO:0003735; F:GO:0019843; C:GO:0005840; C:GO:0005622; P:GO:0006412	F:structural constituent of ribosome; F:rRNA binding; C:ribosome; C:intracellular; P:translation
[INTERPRO, BLASTED, MAPPED, ANNOTATED]	gene_ID_unitig19_44	A0A1A0HI43_9ASCOPDT-domain-containing OS=Metschnikowia bicuspidata bicuspidata NRRL YB-4993 GN=METBIDRAFT_29960 PE=4 SV=1	316	20	1.72888e-159	65.3	3	C:GO:0005737; P:GO:0008152; F:GO:0016829	C:cytoplasm; P:metabolic process; F:lyase activity	G3DSA:3.40.190.10 (GENE3D); IPR002912 (PFAM); IPR008242 (PIRSF); G3DSA:3.40.190.10 (GENE3D); IPR001086 (PFAM); G3DSA:3.30.70.260 (GENE3D); PTHR21022 (PANTHER); PTHR21022:SF11 (PANTHER); IPR001086 (PROSITE_PROFILES); IPR002912 (PROSITE_PROFILES); cd13532 (CDD); cd04905 (CDD); SSF55021 (SUPERFAMILY); SSF53850 (SUPERFAMILY)	F:GO:0004106; P:GO:0009094; C:GO:0005737; F:GO:0004664	F:chorismate mutase activity; P:L-phenylalanine biosynthetic process; C:cytoplasm; F:prephenate dehydratase activity
[INTERPRO, BLASTED, MAPPED, ANNOTATED]	gene_ID_unitig19_45	A0A1A0HH58_9ASCORING U-box OS=Metschnikowia bicuspidata bicuspidata NRRL YB-4993 GN=METBIDRAFT_29961 PE=4 SV=1	128	20	1.58665e-70	78.7	10	F:GO:0008270; F:GO:0061630; C:GO:0035361; P:GO:0000082; C:GO:0005829; P:GO:0031146; C:GO:0043224; C:GO:0031463; F:GO:0030674; P:GO:0042787	F:zinc ion binding; F:ubiquitin protein ligase activity; C:Cul8-RING ubiquitin ligase complex; P:G1/S transition of mitotic cell cycle; C:cytosol; P:SCF-dependent proteasomal ubiquitin-dependent protein catabolic process; C:nuclear SCF ubiquitin ligase complex; C:Cul3-RING ubiquitin ligase complex; F:protein binding, bridging; P:protein ubiquitination involved in ubiquitin-dependent protein catab…	IPR024766 (PFAM); IPR013083 (G3DSA:3.30.40.GENE3D); mobidb-lite (MOBIDB_LITE); PTHR11210:SF38 (PANTHER); PTHR11210 (PANTHER); IPR001841 (PROSITE_PROFILES); IPR001841 (CDD); SSF57850 (SUPERFAMILY)	F:GO:0008270	F:zinc ion binding
[INTERPRO, BLASTED, MAPPED, ANNOTATED]	gene_ID_unitig19_46	A0A1L0GB34_9ASCOAP complex subunit beta OS=	722	20	0	79.85	7	C:GO:0005768; P:GO:0016192; C:GO:0030121; P:GO:0016197; F:GO:0008565; P:GO:0006886; P:GO:0070317	C:endosome; P:vesicle-mediated transport; C:AP-1 adaptor complex; P:endosomal transport; F:protein transporter activity; P:intracellular protein transport; P:negative regulation of G0 to G1 transition	IPR016342 (PIRSF); IPR002553 (PFAM); IPR011989 (G3DSA:1.25.10.GENE3D); mobidb-lite (MOBIDB_LITE); mobidb-lite (MOBIDB_LITE); PTHR11134:SF19 (PANTHER); IPR026739 (PANTHER); cd00020 (CDD); IPR016024 (SUPERFAMILY)	C:GO:0030117; P:GO:0016192; P:GO:0015031; F:GO:0008565; P:GO:0006886; F:GO:0005488	C:membrane coat; P:vesicle-mediated transport; P:protein transport; F:protein transporter activity; P:intracellular protein transport; F:binding
[INTERPRO, BLASTED, MAPPED, ANNOTATED]	gene_ID_unitig19_47	A0A1A0HHN3_9ASCOMED7-domain-containing OS=Metschnikowia bicuspidata bicuspidata NRRL YB-4993 GN=METBIDRAFT_29965 PE=4 SV=1	230	20	1.34511e-97	72.05	5	P:GO:0000122; C:GO:0070847; C:GO:0016592; P:GO:0045944; F:GO:0001104	P:negative regulation of transcription from RNA polymerase II promoter; C:core mediator complex; C:mediator complex; P:positive regulation of transcription from RNA polymerase II promoter; F:RNA polymerase II transcription cofactor activity	IPR009244 (PFAM); mobidb-lite (MOBIDB_LITE); PTHR21428:SF12 (PANTHER); IPR009244 (PANTHER); SSF140718 (SUPERFAMILY)	C:GO:0016592; F:GO:0001104; P:GO:0006357	C:mediator complex; F:RNA polymerase II transcription cofactor activity; P:regulation of transcription from RNA polymerase II promoter
[INTERPRO, BLASTED, MAPPED, ANNOTATED]	gene_ID_unitig19_48	A0A1A0HI08_9ASCOMog1p OS=Metschnikowia bicuspidata bicuspidata NRRL YB-4993 GN=METBIDRAFT_76523 PE=4 SV=1	187	20	9.01111e-93	57.4	3	P:GO:0006913; C:GO:0005737; P:GO:0006886	P:nucleocytoplasmic transport; C:cytoplasm; P:intracellular protein transport	G3DSA:3.40.1000.10 (GENE3D); IPR007681 (PFAM); PTHR15837 (PANTHER); IPR016123 (SUPERFAMILY)	no GO terms	no GO terms
[INTERPRO, BLASTED, MAPPED, ANNOTATED]	gene_ID_unitig19_49	A0A1L0BQH9_9ASCOCIC11C00000000942 OS=	394	20	0	78.95	3	P:GO:0097502; F:GO:0000009; C:GO:0000136	P:mannosylation; F:alpha-1,6-mannosyltransferase activity; C:alpha-1,6-mannosyltransferase complex	Coil (COILS); IPR007577 (PFAM); PTHR31834:SF11 (PANTHER); PTHR31834 (PANTHER); IPR029044 (SUPERFAMILY); TMhelix (TMHMM)	no GO terms	no GO terms
[INTERPRO, BLASTED, MAPPED]	gene_ID_unitig19_50	A0A1L0CTX6_9ASCOCIC11C00000000171 OS=	432	20	4.87437e-136	63.65	5	P:GO:0016042; C:GO:0016020; C:GO:0016021; F:GO:0004806; F:GO:0016787	P:lipid catabolic process; C:membrane; C:integral component of membrane; F:triglyceride lipase activity; F:hydrolase activity	IPR029058 (G3DSA:3.40.50.GENE3D); IPR005152 (PFAM); IPR005152 (PIRSF); PTHR34853 (PANTHER); PTHR34853:SF3 (PANTHER); IPR029058 (SUPERFAMILY)	P:GO:0016042; F:GO:0004806	P:lipid catabolic process; F:triglyceride lipase activity
[INTERPRO, BLASTED, MAPPED, ANNOTATED]	gene_ID_unitig19_51	A0A1A0HI13_9ASCOSaccharopine dehydrogenase OS=Metschnikowia bicuspidata bicuspidata NRRL YB-4993 GN=METBIDRAFT_38422 PE=4 SV=1	444	20	0	89.7	4	F:GO:0004755; C:GO:0005737; P:GO:0055114; P:GO:0019878	F:saccharopine dehydrogenase (NADP+, L-glutamate-forming) activity; C:cytoplasm; P:oxidation-reduction process; P:lysine biosynthetic process via aminoadipic acid	EC:1.5.1.10	Saccharopine dehydrogenase (NADP(+), L-glutamate-forming)	IPR032095 (PFAM); G3DSA:3.30.360.10 (GENE3D); IPR005097 (PFAM); G3DSA:3.40.50.720 (GENE3D); PTHR11133:SF16 (PANTHER); PTHR11133 (PANTHER); IPR001313 (PROSITE_PROFILES); IPR016040 (SUPERFAMILY); SSF55347 (SUPERFAMILY)	F:GO:0003723; F:GO:0016491; P:GO:0055114
[INTERPRO, BLASTED, MAPPED, ANNOTATED]	gene_ID_unitig19_52	A0A1L0DMG5_9ASCOCIC11C00000001424 OS=	496	20	0	58.75	1	C:GO:0005737	C:cytoplasm	IPR003008 (G3DSA:3.40.50.GENE3D); IPR029209 (PFAM); IPR019605 (PFAM); PTHR13391:SF1 (PANTHER); PTHR13391 (PANTHER); IPR003008 (SUPERFAMILY)	F:GO:0003924	F:GTPase activity
[INTERPRO, BLASTED, MAPPED, ANNOTATED]	gene_ID_unitig19_53	A0A1A0H653_9ASCONAD(P)-binding OS=Metschnikowia bicuspidata bicuspidata NRRL YB-4993 GN=METBIDRAFT_13677 PE=4 SV=1	339	20	0	77.15	3	F:GO:0050662; F:GO:0016616; P:GO:0044710	F:coenzyme binding; F:oxidoreductase activity, acting on the CH-OH group of donors, NAD or NADP as acceptor; P:single-organism metabolic process	IPR001509 (PFAM); G3DSA:3.40.50.720 (GENE3D); PTHR10366 (PANTHER); PTHR10366:SF518 (PANTHER); cd05227 (CDD); IPR016040 (SUPERFAMILY)	F:GO:0050662; F:GO:0003824	F:coenzyme binding; F:catalytic activity
[INTERPRO, BLASTED, MAPPED, ANNOTATED]	gene_ID_unitig19_54	A0A1A0HH68_9ASCO -domain-containing OS=Metschnikowia bicuspidata bicuspidata NRRL YB-4993 GN=METBIDRAFT_29973 PE=4 SV=1	355	20	0	68.15	5	P:GO:0010033; F:GO:0005515; F:GO:0043167; P:GO:0006457; P:GO:0006950	P:response to organic substance; F:protein binding; F:ion binding; P:protein folding; P:response to stress	IPR001623 (PRINTS); IPR001623 (SMART); IPR001623 (G3DSA:1.10.287.GENE3D); G3DSA:2.10.230.10 (GENE3D); G3DSA:2.60.260.20 (GENE3D); IPR002939 (PFAM); IPR001305 (PFAM); IPR001623 (PFAM); G3DSA:2.60.260.20 (GENE3D); PTHR43096:SF10 (PANTHER); PTHR43096 (PANTHER); IPR001305 (PROSITE_PROFILES); IPR001623 (PROSITE_PROFILES); IPR001623 (CDD); IPR001305 (CDD); IPR008971 (SUPERFAMILY); IPR001305 (SUPERFAMIL…	F:GO:0031072; F:GO:0051082; P:GO:0006457	F:heat shock protein binding; F:unfolded protein binding; P:protein folding
[INTERPRO, BLASTED, MAPPED, ANNOTATED]	gene_ID_unitig19_55	A0A1A0HHP1_9ASCOPIG-X-domain-containing OS=Metschnikowia bicuspidata bicuspidata NRRL YB-4993 GN=METBIDRAFT_76528 PE=4 SV=1	458	20	6.41772e-173	56	4	P:GO:0019538; C:GO:0016020; C:GO:0005783; P:GO:0044710	P:protein metabolic process; C:membrane; C:endoplasmic reticulum; P:single-organism metabolic process	IPR013233 (SMART); IPR013233 (PFAM); PTHR28533 (PANTHER)	C:GO:0005789; P:GO:0006506	C:endoplasmic reticulum membrane; P:GPI anchor biosynthetic process
[INTERPRO, NO-BLAST]	gene_ID_unitig19_56	---NA---	227	no IPS match	no IPS match	no IPS match
[INTERPRO, BLASTED, MAPPED, ANNOTATED]	gene_ID_unitig19_57	A0A1A0HHP3_9ASCOPhosphatidyl-N-methylethanolamine N-methyltransferase OS=Metschnikowia bicuspidata bicuspidata NRRL YB-4993 GN=METBIDRAFT_29976 PE=3 SV=1	204	20	4.77598e-129	85.4	7	F:GO:0004481; C:GO:0005739; C:GO:0016021; F:GO:0080101; P:GO:0006656; F:GO:0000773; P:GO:0032259	F:methylene-fatty-acyl-phospholipid synthase activity; C:mitochondrion; C:integral component of membrane; F:phosphatidyl-N-dimethylethanolamine N-methyltransferase activity; P:phosphatidylcholine biosynthetic process; F:phosphatidyl-N-methylethanolamine N-methyltransferase activity; P:methylation	EC:2.1.1.16; EC:2.1.1.71	Methylene-fatty-acyl-phospholipid synthase; Phosphatidyl-N-methylethanolamine N-methyltransferase	IPR024960 (PIRSF); IPR007318 (PFAM); IPR024960 (PANTHER); PTHR15458:SF11 (PANTHER); IPR024960 (PROSITE_PROFILES); IPR024960 (HAMAP); TMhelix (TMHMM); TMhelix (TMHMM); TMhelix (TMHMM); TMhelix (TMHMM)	F:GO:0008170; P:GO:0006644
[INTERPRO, BLASTED]	gene_ID_unitig19_58	A0A1L0C482_9ASCOCIC11C00000004816 OS=	314	20	3.98896e-126	69.1	IPR018618 (PFAM); PTHR15898 (PANTHER); PTHR15898:SF12 (PANTHER)	no GO terms	no GO terms
[INTERPRO, BLASTED, MAPPED]	gene_ID_unitig19_59	A0A1L0C658_9ASCOCIC11C00000002851 OS=	311	20	2.09702e-124	57.05	5	P:GO:0008150; C:GO:0005634; C:GO:0005737; C:GO:0005675; F:GO:0003674	P:biological_process; C:nucleus; C:cytoplasm; C:holo TFIIH complex; F:molecular_function	IPR031349 (PFAM); mobidb-lite (MOBIDB_LITE); PTHR37781 (PANTHER)	no GO terms	no GO terms
[INTERPRO, BLASTED, MAPPED]	gene_ID_unitig19_60	A0A1L0BQT5_9ASCOCIC11C00000002114 OS=	175	20	2.58816e-89	60.1	3	P:GO:0008150; C:GO:0005575; F:GO:0003674	P:biological_process; C:cellular_component; F:molecular_function	no IPS match	no IPS match	no IPS match
[INTERPRO, BLASTED]	gene_ID_unitig19_61	B5RT21_DEBHADEHA2B01452p OS=Debaryomyces hansenii (strain ATCC 36239 CBS 767 JCM 1990 NBRC 0083 IGC 2968) GN=DEHA2B01452g PE=4 SV=1	281	20	3.20119e-36	48.55	IPR021031 (PFAM); mobidb-lite (MOBIDB_LITE)	no GO terms	no GO terms
[INTERPRO, BLASTED, MAPPED]	gene_ID_unitig19_62	A0A1A0HHP6_9ASCODNA glycosylase OS=Metschnikowia bicuspidata bicuspidata NRRL YB-4993 GN=METBIDRAFT_36812 PE=4 SV=1	273	20	3.69719e-121	59.85	2	P:GO:0006281; F:GO:0019104	P:DNA repair; F:DNA N-glycosylase activity	IPR005122 (G3DSA:3.40.470.GENE3D); IPR005122 (PFAM); mobidb-lite (MOBIDB_LITE); PTHR12159 (PANTHER); IPR015637 (CDD); IPR005122 (SUPERFAMILY)	P:GO:0006281; F:GO:0019104	P:DNA repair; F:DNA N-glycosylase activity
[INTERPRO, BLASTED, MAPPED, ANNOTATED]	gene_ID_unitig19_63	A0A1L0BQD8_9ASCOCIC11C00000005668 OS=	375	20	1.08018e-91	64.25	2	C:GO:0016020; P:GO:0006611	C:membrane; P:protein export from nucleus	IPR018767 (SMART); IPR018767 (PFAM); mobidb-lite (MOBIDB_LITE); mobidb-lite (MOBIDB_LITE); PTHR28136 (PANTHER); PTHR28136:SF2 (PANTHER); TMhelix (TMHMM); TMhelix (TMHMM)	C:GO:0031965; P:GO:0055088	C:nuclear membrane; P:lipid homeostasis
[INTERPRO, BLASTED, MAPPED]	gene_ID_unitig19_64	A0A1L0BQJ9_9ASCOCIC11C00000001557 OS=	697	20	0	53.05	6	F:GO:0003677; C:GO:0005634; F:GO:0008270; P:GO:0006355; F:GO:0000981; P:GO:0006357	F:DNA binding; C:nucleus; F:zinc ion binding; P:regulation of transcription, DNA-templated; F:RNA polymerase II transcription factor activity, sequence-specific DNA binding; P:regulation of transcription from RNA polymerase II promoter	IPR001138 (SMART); IPR001138 (G3DSA:4.10.240.GENE3D); IPR001138 (PFAM); IPR021858 (PFAM); mobidb-lite (MOBIDB_LITE); PTHR31263 (PANTHER); PTHR31263:SF25 (PANTHER); IPR001138 (PROSITE_PATTERNS); IPR001138 (PROSITE_PROFILES); IPR001138 (CDD); IPR001138 (SUPERFAMILY)	C:GO:0005634; F:GO:0008270; P:GO:0006355; F:GO:0000981	C:nucleus; F:zinc ion binding; P:regulation of transcription, DNA-templated; F:RNA polymerase II transcription factor activity, sequence-specific DNA binding
[INTERPRO, BLASTED, MAPPED, ANNOTATED]	gene_ID_unitig19_65	A0A1L0BQU4_9ASCOCIC11C00000005266 OS=	1234	20	0	58.15	2	P:GO:0006810; F:GO:0016787	P:transport; F:hydrolase activity	IPR003593 (SMART); G3DSA:3.40.50.300 (GENE3D); IPR003439 (PFAM); G3DSA:1.20.1560.10 (GENE3D); G3DSA:3.40.50.300 (GENE3D); IPR011527 (PFAM); PTHR24221 (PANTHER); IPR017871 (PROSITE_PATTERNS); IPR017871 (PROSITE_PATTERNS); IPR003439 (PROSITE_PROFILES); IPR003439 (PROSITE_PROFILES); IPR011527 (PROSITE_PROFILES); IPR011527 (PROSITE_PROFILES); cd03228 (CDD); IPR027417 (SUPERFAMILY); IPR027417 (SUPERFA…	F:GO:0016887; F:GO:0005524; F:GO:0042626; P:GO:0055085; C:GO:0016021; P:GO:0006810	F:ATPase activity; F:ATP binding; F:ATPase activity, coupled to transmembrane movement of substances; P:transmembrane transport; C:integral component of membrane; P:transport
[INTERPRO, BLASTED, MAPPED, ANNOTATED]	gene_ID_unitig19_66_partial	A0A1A0HH78_9ASCOUbiquitin-activating enzyme E1 OS=Metschnikowia bicuspidata bicuspidata NRRL YB-4993 GN=METBIDRAFT_34070 PE=3 SV=1	665	20	0	78.65	6	C:GO:0005634; F:GO:0005524; F:GO:0016407; C:GO:0005737; F:GO:0004839; P:GO:0016567	C:nucleus; F:ATP binding; F:acetyltransferase activity; C:cytoplasm; F:ubiquitin activating enzyme activity; P:protein ubiquitination	IPR018965 (SMART); IPR000594 (PFAM); IPR018965 (PFAM); IPR023318 (G3DSA:1.10.10.GENE3D); IPR019572 (PFAM); G3DSA:3.40.50.720 (GENE3D); G3DSA:3.40.50.720 (GENE3D); IPR023318 (G3DSA:1.10.10.GENE3D); PTHR10953:SF182 (PANTHER); PTHR10953 (PANTHER); IPR000594 (SUPERFAMILY); IPR000594 (SUPERFAMILY); IPR000594 (SUPERFAMILY)	F:GO:0008641; F:GO:0016881	F:small protein activating enzyme activity; F:acid-amino acid ligase activity
[INTERPRO, BLASTED, MAPPED, ANNOTATED]	gene_ID_unitig20_1	A0A1L0D5K7_9ASCOCIC11C00000002489 OS=	743	20	0	67.75	5	F:GO:0000030; P:GO:0006493; P:GO:0097502; C:GO:0044425; C:GO:0005886	F:mannosyltransferase activity; P:protein O-linked glycosylation; P:mannosylation; C:membrane part; C:plasma membrane	IPR016093 (SMART); IPR003342 (PFAM); G3DSA:2.80.10.50 (GENE3D); IPR016093 (PFAM); IPR032421 (PFAM); mobidb-lite (MOBIDB_LITE); IPR027005 (PANTHER); IPR016093 (PROSITE_PROFILES); IPR016093 (PROSITE_PROFILES); IPR016093 (PROSITE_PROFILES); IPR016093 (SUPERFAMILY); TMhelix (TMHMM); TMhelix (TMHMM); TMhelix (TMHMM); TMhelix (TMHMM); TMhelix (TMHMM); TMhelix (TMHMM); TMhelix (TMHMM); TMhelix (TMHMM); …	P:GO:0006493; F:GO:0000030; C:GO:0016020	P:protein O-linked glycosylation; F:mannosyltransferase activity; C:membrane
[INTERPRO, BLASTED, MAPPED, ANNOTATED]	gene_ID_unitig20_2	A0A1L0BPR2_9ASCOCIC11C00000000558 OS=	452	20	0	76.7	2	C:GO:0005739; C:GO:0019005	C:mitochondrion; C:SCF ubiquitin ligase complex	IPR032675 (G3DSA:3.80.10.GENE3D); SSF52047 (SUPERFAMILY)	no GO terms	no GO terms
[INTERPRO, BLASTED, MAPPED, ANNOTATED]	gene_ID_unitig20_3	A0A1A0HJP9_9ASCO40S ribosomal S27 OS=Metschnikowia bicuspidata bicuspidata NRRL YB-4993 GN=METBIDRAFT_37809 PE=3 SV=1	115	20	2.60613e-54	97.05	4	F:GO:0003735; F:GO:0046872; C:GO:0005840; P:GO:0006412	F:structural constituent of ribosome; F:metal ion binding; C:ribosome; P:translation	IPR023407 (G3DSA:2.20.25.GENE3D); IPR000592 (PFAM); PTHR11594:SF7 (PANTHER); IPR000592 (PANTHER); IPR000592 (PROSITE_PATTERNS); IPR000592 (PRODOM); IPR000592 (HAMAP); IPR011332 (SUPERFAMILY)	F:GO:0003735; C:GO:0005840; C:GO:0005622; P:GO:0006412	F:structural constituent of ribosome; C:ribosome; C:intracellular; P:translation
[INTERPRO, BLASTED, MAPPED, ANNOTATED]	gene_ID_unitig20_4	A0A1A0HJH8_9ASCOMitochondrial ribosomal OS=Metschnikowia bicuspidata bicuspidata NRRL YB-4993 GN=METBIDRAFT_65582 PE=4 SV=1	817	20	0	68.3	5	P:GO:0044260; F:GO:0003824; P:GO:0034641; C:GO:0005840; P:GO:0044238	P:cellular macromolecule metabolic process; F:catalytic activity; P:cellular nitrogen compound metabolic process; C:ribosome; P:primary metabolic process	Coil (COILS); IPR016522 (PIRSF); PF13489 (PFAM); IPR015324 (PFAM); G3DSA:3.40.50.150 (GENE3D); mobidb-lite (MOBIDB_LITE); mobidb-lite (MOBIDB_LITE); PTHR13184:SF6 (PANTHER); PTHR13184 (PANTHER); IPR029063 (SUPERFAMILY)	F:GO:0008168; P:GO:0006412	F:methyltransferase activity; P:translation
[INTERPRO, BLASTED, MAPPED, ANNOTATED]	gene_ID_unitig20_5	A0A1A0HJP4_9ASCOMICOS complex subunit OS=Metschnikowia bicuspidata bicuspidata NRRL YB-4993 GN=METBIDRAFT_34678 PE=4 SV=1	244	20	2.50473e-125	69.1	2	C:GO:0016021; C:GO:0005743	C:integral component of membrane; C:mitochondrial inner membrane	IPR019166 (PFAM); PTHR28268:SF2 (PANTHER); IPR033181 (PANTHER); TMhelix (TMHMM); TMhelix (TMHMM)	P:GO:0042407; C:GO:0061617	P:cristae formation; C:MICOS complex
[INTERPRO, BLASTED, MAPPED]	gene_ID_unitig20_6	A0A1L0BLC0_9ASCOCIC11C00000003809 OS=	321	20	0	51.8	5	P:GO:0008150; C:GO:0016020; C:GO:0016021; C:GO:0005575; F:GO:0003674	P:biological_process; C:membrane; C:integral component of membrane; C:cellular_component; F:molecular_function	Coil (COILS); mobidb-lite (MOBIDB_LITE)	no GO terms	no GO terms
[INTERPRO, BLASTED, MAPPED, ANNOTATED]	gene_ID_unitig20_7	A0A1A0HJ60_9ASCOMitochondrial carrier OS=Metschnikowia bicuspidata bicuspidata NRRL YB-4993 GN=METBIDRAFT_34961 PE=3 SV=1	374	20	0	74.1	2	C:GO:0016020; P:GO:0006810	C:membrane; P:transport	IPR002067 (PRINTS); IPR023395 (G3DSA:1.50.40.GENE3D); IPR018108 (PFAM); PTHR24089:SF434 (PANTHER); PTHR24089 (PANTHER); IPR018108 (PROSITE_PROFILES); IPR018108 (PROSITE_PROFILES); IPR018108 (PROSITE_PROFILES); IPR023395 (SUPERFAMILY)	P:GO:0055085	P:transmembrane transport
[INTERPRO, BLASTED, MAPPED, ANNOTATED]	gene_ID_unitig20_8	A0A1A0HJ43_9ASCOKontroller of growth OS=Metschnikowia bicuspidata bicuspidata NRRL YB-4993 GN=METBIDRAFT_35216 PE=4 SV=1	1448	20	0	84.15	8	F:GO:0043130; P:GO:0001558; C:GO:0000329; C:GO:0005739; P:GO:0031929; P:GO:0009267; C:GO:0031931; C:GO:0005886	F:ubiquitin binding; P:regulation of cell growth; C:fungal-type vacuole membrane; C:mitochondrion; P:TOR signaling; P:cellular response to starvation; C:TORC1 complex; C:plasma membrane	PR01547 (PRINTS); IPR029347 (SMART); IPR001680 (SMART); IPR029347 (PFAM); IPR011989 (G3DSA:1.25.10.GENE3D); IPR015943 (G3DSA:2.130.10.GENE3D); IPR015943 (G3DSA:2.130.10.GENE3D); G3DSA:3.40.50.1460 (GENE3D); mobidb-lite (MOBIDB_LITE); mobidb-lite (MOBIDB_LITE); PTHR12848:SF18 (PANTHER); IPR004083 (PANTHER); IPR019775 (PROSITE_PATTERNS); IPR001680 (PROSITE_PROFILES); IPR017986 (PROSITE_PROFILES); I…	F:GO:0005515; P:GO:0031929; F:GO:0005488; C:GO:0031931	F:protein binding; P:TOR signaling; F:binding; C:TORC1 complex
[INTERPRO, BLASTED, MAPPED]	gene_ID_unitig20_9	A0A1L0BLP7_9ASCOCIC11C00000002855 OS=	192	20	3.19371e-50	53.4	8	P:GO:0045292; F:GO:0046872; F:GO:0005509; C:GO:0001527; C:GO:0005684; C:GO:0005576; P:GO:0030500; P:GO:0031214	P:mRNA cis splicing, via spliceosome; F:metal ion binding; F:calcium ion binding; C:microfibril; C:U2-type spliceosomal complex; C:extracellular region; P:regulation of bone mineralization; P:biomineral tissue development	IPR009730 (PFAM); mobidb-lite (MOBIDB_LITE); mobidb-lite (MOBIDB_LITE)	no GO terms	no GO terms
[INTERPRO, BLASTED, MAPPED, ANNOTATED]	gene_ID_unitig20_10	A0A1L0BLB0_9ASCOCIC11C00000003045 OS=	246	20	4.15525e-156	79.85	4	F:GO:0016702; F:GO:0005506; P:GO:0019451; P:GO:0055114	F:oxidoreductase activity, acting on single donors with incorporation of molecular oxygen, incorporation of two atoms of oxygen; F:iron ion binding; P:L-cysteine catabolic process to pyruvate, using cysteine dioxygenase; P:oxidation-reduction process	EC:1.13.11	Acting on single donors with incorporation of molecular oxygen (oxygenases). The oxygen incorporated need not be derived from O(2)	IPR014710 (G3DSA:2.60.120.GENE3D); IPR010300 (PFAM); IPR010300 (PANTHER); IPR011051 (SUPERFAMILY)	F:GO:0016702; F:GO:0005506; P:GO:0055114
[INTERPRO, BLASTED, MAPPED, ANNOTATED]	gene_ID_unitig20_11	A0A1L0BKC7_9ASCOCIC11C00000005667 OS=	479	20	0	61.1	1	C:GO:0016020	C:membrane	IPR004695 (PFAM); PTHR31686:SF4 (PANTHER); PTHR31686 (PANTHER); TMhelix (TMHMM); TMhelix (TMHMM); TMhelix (TMHMM); TMhelix (TMHMM); TMhelix (TMHMM); TMhelix (TMHMM); TMhelix (TMHMM); TMhelix (TMHMM); TMhelix (TMHMM); TMhelix (TMHMM)	P:GO:0055085; C:GO:0016021	P:transmembrane transport; C:integral component of membrane
[INTERPRO, BLASTED, MAPPED]	gene_ID_unitig20_12	A0A1L0G6I6_9ASCOCIC11C00000003442 OS=	719	20	2.73942e-131	45.95	2	C:GO:1990071; P:GO:0006891	C:TRAPPII protein complex; P:intra-Golgi vesicle-mediated transport	IPR024662 (PFAM); mobidb-lite (MOBIDB_LITE); mobidb-lite (MOBIDB_LITE); mobidb-lite (MOBIDB_LITE); PTHR28159 (PANTHER); PTHR28159:SF2 (PANTHER)	C:GO:1990071; P:GO:0006891	C:TRAPPII protein complex; P:intra-Golgi vesicle-mediated transport
[INTERPRO, BLASTED, MAPPED, ANNOTATED]	gene_ID_unitig20_13	A0A1L0G5G0_9ASCOCIC11C00000001479 OS=	689	20	0	65.3	3	C:GO:0043231; C:GO:0044444; F:GO:0008233	C:intracellular membrane-bounded organelle; C:cytoplasmic part; F:peptidase activity	IPR024080 (G3DSA:1.20.1050.GENE3D); IPR001567 (PFAM); G3DSA:1.10.1370.10 (GENE3D); PTHR11804 (PANTHER); PTHR11804:SF65 (PANTHER); SSF55486 (SUPERFAMILY)	P:GO:0006508; F:GO:0004222	P:proteolysis; F:metalloendopeptidase activity
[INTERPRO, BLASTED, MAPPED, ANNOTATED]	gene_ID_unitig20_14	A0A1A0HJ50_9ASCOGlycyl-tRNA synthetase OS=Metschnikowia bicuspidata bicuspidata NRRL YB-4993 GN=METBIDRAFT_30378 PE=4 SV=1	656	20	0	88.7	4	F:GO:0004820; F:GO:0005524; P:GO:0006426; C:GO:0005737	F:glycine-tRNA ligase activity; F:ATP binding; P:glycyl-tRNA aminoacylation; C:cytoplasm	EC:6.1.1.14	Glycine--tRNA ligase	IPR002315 (PRINTS); IPR004154 (G3DSA:3.40.50.GENE3D); IPR004154 (PFAM); G3DSA:3.30.930.10 (GENE3D); IPR002315 (TIGRFAM); IPR002314 (PFAM); IPR027031 (PANTHER); PTHR10745:SF10 (PANTHER); IPR006195 (PROSITE_PROFILES); IPR033731 (CDD); cd00858 (CDD); IPR004154 (SUPERFAMILY); SSF55681 (SUPERFAMILY)	F:GO:0000166; F:GO:0005524; F:GO:0004820; P:GO:0006418; P:GO:0006426; F:GO:0004812; C:GO:0005737
[INTERPRO, BLASTED, MAPPED, ANNOTATED]	gene_ID_unitig20_15	A0A1L0D175_9ASCOCIC11C00000001042 OS=	548	20	0	71.1	4	F:GO:0000166; F:GO:0050662; C:GO:0016020; F:GO:0016709	F:nucleotide binding; F:coenzyme binding; C:membrane; F:oxidoreductase activity, acting on paired donors, with incorporation or reduction of molecular oxygen, NAD(P)H as one donor, and incorporation of one atom of oxygen	EC:1.14.13	Acting on paired donors, with incorporation or reduction of molecular oxygen. The oxygen incorporated need not be derived from O(2)	IPR023753 (G3DSA:3.50.50.GENE3D); IPR020946 (PFAM); IPR023753 (G3DSA:3.50.50.GENE3D); PTHR42877 (PANTHER); PTHR42877:SF4 (PANTHER); IPR023753 (SUPERFAMILY)	F:GO:0050661; F:GO:0016491; F:GO:0050660; P:GO:0055114; F:GO:0004499
[INTERPRO, BLASTED, MAPPED]	gene_ID_unitig20_16	A0A1L0BKD4_9ASCOCIC11C00000005746 OS=	645	20	0	57.5	2	C:GO:0016020; C:GO:0016021	C:membrane; C:integral component of membrane	IPR022535 (PFAM); IPR025969 (PFAM); IPR015672 (PANTHER); TMhelix (TMHMM); TMhelix (TMHMM); TMhelix (TMHMM); TMhelix (TMHMM)	C:GO:0016020	C:membrane
[INTERPRO, BLASTED, MAPPED, ANNOTATED]	gene_ID_unitig20_17	A0A1L0G6H8_9ASCOCIC11C00000000840 OS=	237	20	1.66435e-139	82.4	11	C:GO:0005634; F:GO:0003735; F:GO:0000150; P:GO:0006351; P:GO:0006310; P:GO:0006355; P:GO:0034599; P:GO:0090297; C:GO:0005762; F:GO:0003697; P:GO:0000002	C:nucleus; F:structural constituent of ribosome; F:recombinase activity; P:transcription, DNA-templated; P:DNA recombination; P:regulation of transcription, DNA-templated; P:cellular response to oxidative stress; P:positive regulation of mitochondrial DNA replication; C:mitochondrial large ribosomal subunit; F:single-stranded DNA binding; P:mitochondrial genome maintenance	IPR024629 (PFAM); PTHR28184 (PANTHER)	no GO terms	no GO terms
[INTERPRO, NO-BLAST]	gene_ID_unitig20_18	---NA---	114	no IPS match	no IPS match	no IPS match
[INTERPRO, BLASTED, MAPPED, ANNOTATED]	gene_ID_unitig20_19	A0A1L0BLN3_9ASCOCIC11C00000001542 OS=	617	20	0	55.95	1	F:GO:0005488	F:binding	IPR001138 (G3DSA:4.10.240.GENE3D); IPR007219 (PFAM); mobidb-lite (MOBIDB_LITE); PTHR31944 (PANTHER); IPR001138 (PROSITE_PROFILES); cd12148 (CDD); IPR001138 (CDD); IPR001138 (SUPERFAMILY); TMhelix (TMHMM)	C:GO:0005634; F:GO:0003677; F:GO:0008270; P:GO:0006351; P:GO:0006355; F:GO:0000981	C:nucleus; F:DNA binding; F:zinc ion binding; P:transcription, DNA-templated; P:regulation of transcription, DNA-templated; F:RNA polymerase II transcription factor activity, sequence-specific DNA binding
[INTERPRO, BLASTED, MAPPED, ANNOTATED]	gene_ID_unitig20_20	A0A1A0HIN6_9ASCO26S proteasome subunit P45 OS=Metschnikowia bicuspidata bicuspidata NRRL YB-4993 GN=METBIDRAFT_37019 PE=3 SV=1	445	20	0	94.9	9	C:GO:0005634; F:GO:0005524; C:GO:0008540; P:GO:0070682; C:GO:0005829; P:GO:0045732; F:GO:0008233; P:GO:0006511; P:GO:0045899	C:nucleus; F:ATP binding; C:proteasome regulatory particle, base subcomplex; P:proteasome regulatory particle assembly; C:cytosol; P:positive regulation of protein catabolic process; F:peptidase activity; P:ubiquitin-dependent protein catabolic process; P:positive regulation of RNA polymerase II transcriptional preinitiation complex assembly	Coil (COILS); IPR003593 (SMART); G3DSA:3.40.50.300 (GENE3D); IPR005937 (TIGRFAM); IPR003959 (PFAM); G3DSA:1.10.8.60 (GENE3D); mobidb-lite (MOBIDB_LITE); PTHR23073 (PANTHER); PTHR23073:SF46 (PANTHER); IPR003960 (PROSITE_PATTERNS); cd00009 (CDD); IPR027417 (SUPERFAMILY)	F:GO:0005524; C:GO:0005737; P:GO:0030163; F:GO:0016787	F:ATP binding; C:cytoplasm; P:protein catabolic process; F:hydrolase activity
[INTERPRO, BLASTED, MAPPED, ANNOTATED]	gene_ID_unitig20_21	A0A1L0BL07_9ASCOCIC11C00000003406 OS=	196	20	3.92098e-134	87.5	7	F:GO:0001056; F:GO:0003677; P:GO:0001023; C:GO:0000790; C:GO:0005829; P:GO:0042797; C:GO:0005666	F:RNA polymerase III activity; F:DNA binding; P:transcription initiation from RNA polymerase III type 2 promoter; C:nuclear chromatin; C:cytosol; P:tRNA transcription from RNA polymerase III promoter; C:DNA-directed RNA polymerase III complex	EC:2.7.7.6	DNA-directed RNA polymerase	IPR005576 (G3DSA:3.30.1490.GENE3D); G3DSA:2.40.50.140 (GENE3D); IPR004519 (TIGRFAM); IPR005576 (PFAM); IPR013238 (PFAM); PTHR12709:SF7 (PANTHER); PTHR12709 (PANTHER); cd04330 (CDD); IPR005576 (SUPERFAMILY); IPR012340 (SUPERFAMILY)	F:GO:0003677; F:GO:0003899; P:GO:0006351
[INTERPRO, BLASTED, MAPPED, ANNOTATED]	gene_ID_unitig20_22	A0A1L0BLM6_9ASCOCIC11C00000002652 OS=	456	20	0	79.95	2	C:GO:0005739; C:GO:0016021	C:mitochondrion; C:integral component of membrane	IPR000504 (SMART); G3DSA:3.30.70.330 (GENE3D); IPR000504 (PFAM); mobidb-lite (MOBIDB_LITE); PTHR15241 (PANTHER); IPR000504 (PROSITE_PROFILES); IPR000504 (SUPERFAMILY); TMhelix (TMHMM); TMhelix (TMHMM)	F:GO:0003676	F:nucleic acid binding
[INTERPRO, NO-BLAST]	gene_ID_unitig20_23	---NA---	372	mobidb-lite (MOBIDB_LITE); mobidb-lite (MOBIDB_LITE)	no GO terms	no GO terms
[INTERPRO, BLASTED, MAPPED, ANNOTATED]	gene_ID_unitig20_24	A0A1L0G5K3_9ASCOCIC11C00000003888 OS=	661	20	3.0403e-85	50	4	F:GO:0046983; P:GO:0031325; C:GO:0044424; P:GO:0009987	F:protein dimerization activity; P:positive regulation of cellular metabolic process; C:intracellular part; P:cellular process	IPR011598 (SMART); IPR011598 (G3DSA:4.10.280.GENE3D); IPR011598 (PFAM); mobidb-lite (MOBIDB_LITE); mobidb-lite (MOBIDB_LITE); mobidb-lite (MOBIDB_LITE); mobidb-lite (MOBIDB_LITE); mobidb-lite (MOBIDB_LITE); PTHR10985:SF112 (PANTHER); PTHR10985 (PANTHER); IPR011598 (PROSITE_PROFILES); IPR011598 (CDD); IPR011598 (SUPERFAMILY)	F:GO:0046983	F:protein dimerization activity
[INTERPRO, BLASTED]	gene_ID_unitig20_25	A0A1L0DI82_9ASCOCIC11C00000003677 OS=	372	20	1.30721e-99	60.05	IPR028094 (SMART); IPR028094 (PFAM); mobidb-lite (MOBIDB_LITE); mobidb-lite (MOBIDB_LITE); mobidb-lite (MOBIDB_LITE); PTHR41391 (PANTHER)	no GO terms	no GO terms
[INTERPRO, BLASTED, MAPPED, ANNOTATED]	gene_ID_unitig20_26	A0A1A0HJE9_9ASCODihydropteroate synthase OS=Metschnikowia bicuspidata bicuspidata NRRL YB-4993 GN=METBIDRAFT_37497 PE=4 SV=1	775	20	0	66.5	5	P:GO:0009396; C:GO:0005739; F:GO:0016829; F:GO:0016772; F:GO:0005488	P:folic acid-containing compound biosynthetic process; C:mitochondrion; F:lyase activity; F:transferase activity, transferring phosphorus-containing groups; F:binding	IPR006157 (SMART); G3DSA:3.30.1130.10 (GENE3D); G3DSA:3.30.1130.10 (GENE3D); IPR000550 (TIGRFAM); IPR000550 (PFAM); IPR000550 (G3DSA:3.30.70.GENE3D); G3DSA:3.20.20.20 (GENE3D); IPR006157 (TIGRFAM); IPR006157 (PFAM); IPR000489 (PFAM); mobidb-lite (MOBIDB_LITE); PTHR20941 (PANTHER); IPR000489 (PROSITE_PATTERNS); IPR000489 (PROSITE_PATTERNS); IPR000489 (PROSITE_PROFILES); IPR006390 (CDD); IPR000550 …	P:GO:0042558; P:GO:0009396; F:GO:0004150; F:GO:0003848; P:GO:0006760; F:GO:0004156; P:GO:0044237	P:pteridine-containing compound metabolic process; P:folic acid-containing compound biosynthetic process; F:dihydroneopterin aldolase activity; F:2-amino-4-hydroxy-6-hydroxymethyldihydropteridine diphosphokinase activity; P:folic acid-containing compound metabolic process; F:dihydropteroate synthase activity; P:cellular metabolic process
[INTERPRO, BLASTED, MAPPED]	gene_ID_unitig20_27	A0A1L0DN04_9ASCOCIC11C00000000765 OS=	135	20	4.65701e-54	59.7	3	P:GO:0008150; C:GO:0005575; F:GO:0003674	P:biological_process; C:cellular_component; F:molecular_function	mobidb-lite (MOBIDB_LITE); PTHR38699 (PANTHER); PTHR38699:SF2 (PANTHER)	no GO terms	no GO terms
[INTERPRO, NO-BLAST]	gene_ID_unitig20_28	---NA---	219	no IPS match	no IPS match	no IPS match
[INTERPRO, BLASTED, MAPPED, ANNOTATED]	gene_ID_unitig20_29	A0A1A0HIM6_9ASCOInsert subdomain of RNA polymerase alpha subunit OS=Metschnikowia bicuspidata bicuspidata NRRL YB-4993 GN=METBIDRAFT_38386 PE=4 SV=1	305	20	0	86.45	7	F:GO:0003677; F:GO:0003899; P:GO:0006351; P:GO:0042493; C:GO:0005829; F:GO:0046983; C:GO:0005665	F:DNA binding; F:DNA-directed 5'-3' RNA polymerase activity; P:transcription, DNA-templated; P:response to drug; C:cytosol; F:protein dimerization activity; C:DNA-directed RNA polymerase II, core complex	EC:2.7.7.6	DNA-directed RNA polymerase	IPR011263 (SMART); IPR011263 (PFAM); G3DSA:3.30.1360.10 (GENE3D); IPR011262 (G3DSA:2.170.120.GENE3D); IPR011262 (PFAM); PTHR11800 (PANTHER); PTHR11800:SF14 (PANTHER); IPR001514 (PROSITE_PATTERNS); cd07031 (CDD); IPR009025 (SUPERFAMILY); IPR011262 (SUPERFAMILY)	F:GO:0003677; F:GO:0003899; P:GO:0006351; F:GO:0046983
[INTERPRO, BLASTED, MAPPED, ANNOTATED]	gene_ID_unitig20_30	A0A1L0DQR4_9ASCO-1(5-phosphoribosyl)-5-[(5-phosphoribosylamino)methylideneamino] imidazole-4-carboxamide isomerase OS=	273	20	3.42867e-159	81.1	3	C:GO:0005737; F:GO:0003949; P:GO:0000105	C:cytoplasm; F:-1(5-phosphoribosyl)-5-[(5-phosphoribosylamino)methylideneamino]imidazole-4-carboxamide isomerase activity; P:histidine biosynthetic process	EC:5.3.1.16	-1(5-phosphoribosyl)-5-	IPR006062 (PFAM); IPR011858 (TIGRFAM); IPR013785 (G3DSA:3.20.20.GENE3D); PTHR43090 (PANTHER); cd04723 (CDD); IPR011060 (SUPERFAMILY)	F:GO:0003824; P:GO:0008152; F:GO:0003949; P:GO:0000105
[INTERPRO, BLASTED, MAPPED, ANNOTATED]	gene_ID_unitig20_31	A0A1L0GSF8_9ASCOCIC11C00000000534 OS=	325	20	1.11767e-164	71.7	1	C:GO:0005634	C:nucleus	Coil (COILS); Coil (COILS); mobidb-lite (MOBIDB_LITE); mobidb-lite (MOBIDB_LITE); PTHR28096 (PANTHER); PTHR28096:SF2 (PANTHER)	no GO terms	no GO terms
[INTERPRO, BLASTED, MAPPED, ANNOTATED]	gene_ID_unitig20_32	A0A1A0HIM2_9ASCOATP-dependent metallopeptidase Hfl OS=Metschnikowia bicuspidata bicuspidata NRRL YB-4993 GN=METBIDRAFT_76910 PE=3 SV=1	1378	20	0	89.55	9	P:GO:0045041; F:GO:0005524; P:GO:0006515; P:GO:0051604; F:GO:0004176; P:GO:0006457; C:GO:0031942; F:GO:0004222; P:GO:0001300	P:protein import into mitochondrial intermembrane space; F:ATP binding; P:misfolded or incompletely synthesized protein catabolic process; P:protein maturation; F:ATP-dependent peptidase activity; P:protein folding; C:i-AAA complex; F:metalloendopeptidase activity; P:chronological cell aging	EC:3.4.24; EC:3.6.1.3; EC:3.6.1.15	Acting on peptide bonds (peptidases); Adenosinetriphosphatase; Nucleoside-triphosphate phosphatase	Coil (COILS); IPR003593 (SMART); IPR003959 (PFAM); IPR005936 (TIGRFAM); G3DSA:1.10.8.60 (GENE3D); IPR022816 (PFAM); IPR000642 (PFAM); G3DSA:3.40.50.300 (GENE3D); mobidb-lite (MOBIDB_LITE); mobidb-lite (MOBIDB_LITE); mobidb-lite (MOBIDB_LITE); mobidb-lite (MOBIDB_LITE); PTHR23076:SF89 (PANTHER); PTHR23076 (PANTHER); IPR003960 (PROSITE_PATTERNS); IPR005936 (HAMAP); cd00009 (CDD); IPR027417 (SUPERFA…	F:GO:0005524; P:GO:0007076; C:GO:0016020; P:GO:0006508; F:GO:0004222; C:GO:0000796
[INTERPRO, BLASTED, MAPPED, ANNOTATED]	gene_ID_unitig20_33	A0A1L0C316_9ASCOCIC11C00000002141 OS=	716	20	0	64.7	4	F:GO:0000166; F:GO:0003676; P:GO:0043628; P:GO:0006401	F:nucleotide binding; F:nucleic acid binding; P:ncRNA 3'-end processing; P:RNA catabolic process	IPR006569 (SMART); IPR000504 (SMART); IPR008942 (G3DSA:1.25.40.GENE3D); G3DSA:3.30.70.330 (GENE3D); IPR000504 (PFAM); mobidb-lite (MOBIDB_LITE); mobidb-lite (MOBIDB_LITE); mobidb-lite (MOBIDB_LITE); PTHR23189:SF57 (PANTHER); PTHR23189 (PANTHER); IPR006569 (PROSITE_PROFILES); IPR000504 (PROSITE_PROFILES); IPR008942 (SUPERFAMILY); IPR000504 (SUPERFAMILY)	F:GO:0003676	F:nucleic acid binding
[INTERPRO, BLASTED, MAPPED, ANNOTATED]	gene_ID_unitig20_34	A0A1L0C5P2_9ASCOCIC11C00000000077 OS=	265	20	1.10232e-157	75.05	2	F:GO:0003735; C:GO:0005762	F:structural constituent of ribosome; C:mitochondrial large ribosomal subunit	G3DSA:3.90.79.10 (GENE3D); IPR021757 (PFAM); PTHR13124:SF13 (PANTHER); PTHR13124 (PANTHER)	no GO terms	no GO terms
[INTERPRO, BLASTED, MAPPED, ANNOTATED]	gene_ID_unitig20_35	A0A1A0HJ23_9ASCODUF1692-domain-containing OS=Metschnikowia bicuspidata bicuspidata NRRL YB-4993 GN=METBIDRAFT_30358 PE=4 SV=1	416	20	0	79.6	4	P:GO:0006888; C:GO:0030173; C:GO:0030176; C:GO:0030134	P:ER to Golgi vesicle-mediated transport; C:integral component of Golgi membrane; C:integral component of endoplasmic reticulum membrane; C:ER to Golgi transport vesicle	PF13850 (PFAM); IPR012936 (PFAM); PTHR10984 (PANTHER); PTHR10984:SF39 (PANTHER); TMhelix (TMHMM); TMhelix (TMHMM)	no GO terms	no GO terms
[INTERPRO, BLASTED, MAPPED]	gene_ID_unitig23_1_partial	A0A1L0G3X3_9ASCOCIC11C00000003150 OS=	1698	20	0	59.55	3	F:GO:0004842; F:GO:0016874; P:GO:0016567	F:ubiquitin-protein transferase activity; F:ligase activity; P:protein ubiquitination	IPR010314 (PFAM); IPR010309 (PFAM); IPR011989 (G3DSA:1.25.10.GENE3D); mobidb-lite (MOBIDB_LITE); mobidb-lite (MOBIDB_LITE); IPR016024 (SUPERFAMILY)	F:GO:0005488	F:binding
[INTERPRO, BLASTED, MAPPED, ANNOTATED]	gene_ID_unitig23_2	A0A1A0HI01_9ASCOSm-like ribonucleo OS=Metschnikowia bicuspidata bicuspidata NRRL YB-4993 GN=METBIDRAFT_34148 PE=4 SV=1	88	20	6.48644e-53	90.3	8	C:GO:0046540; C:GO:0005682; C:GO:0005829; C:GO:0019013; C:GO:0071004; C:GO:0005686; C:GO:0005685; P:GO:0000398	C:U4/U6 x U5 tri-snRNP complex; C:U5 snRNP; C:cytosol; C:viral nucleocapsid; C:U2-type prespliceosome; C:U2 snRNP; C:U1 snRNP; P:mRNA splicing, via spliceosome	IPR001163 (SMART); IPR001163 (PFAM); G3DSA:2.30.30.100 (GENE3D); PTHR11193:SF3 (PANTHER); IPR027078 (PANTHER); IPR027078 (CDD); IPR010920 (SUPERFAMILY)	C:GO:0005681; P:GO:0000398	C:spliceosomal complex; P:mRNA splicing, via spliceosome
[INTERPRO, BLASTED]	gene_ID_unitig23_3	A0A1L0D9E3_9ASCOCIC11C00000004265 OS=	105	3	2.85565e-22	62.33	mobidb-lite (MOBIDB_LITE)	no GO terms	no GO terms
[INTERPRO, BLASTED, MAPPED]	gene_ID_unitig23_4	A0A1A0HH63_9ASCOUncharacterized protein OS=Metschnikowia bicuspidata var. bicuspidata NRRL YB-4993 GN=METBIDRAFT_9776 PE=4 SV=1	946	20	9.04339e-65	48.85	3	F:GO:0003677; P:GO:0015074; P:GO:0006310	F:DNA binding; P:DNA integration; P:DNA recombination	Coil (COILS); G3DSA:1.10.287.540 (GENE3D); IPR022210 (PFAM); IPR031872 (PFAM); mobidb-lite (MOBIDB_LITE); mobidb-lite (MOBIDB_LITE)	no GO terms	no GO terms
[INTERPRO, BLASTED, MAPPED, ANNOTATED]	gene_ID_unitig23_5	A0A1A0HIS4_9ASCORecombination Rad52 OS=Metschnikowia bicuspidata bicuspidata NRRL YB-4993 GN=METBIDRAFT_35260 PE=4 SV=1	499	20	4.25098e-152	64.8	13	P:GO:0000709; P:GO:0000727; P:GO:0006277; C:GO:0000228; P:GO:0000722; P:GO:0000733; P:GO:0000730; P:GO:0006301; P:GO:0030447; F:GO:0000150; P:GO:0045002; P:GO:0071478; P:GO:0070887	P:meiotic joint molecule formation; P:double-strand break repair via break-induced replication; P:DNA amplification; C:nuclear chromosome; P:telomere maintenance via recombination; P:DNA strand renaturation; P:DNA recombinase assembly; P:postreplication repair; P:filamentous growth; F:recombinase activity; P:double-strand break repair via single-strand annealing; P:cellular response to radiation;…	IPR007232 (PFAM); mobidb-lite (MOBIDB_LITE); mobidb-lite (MOBIDB_LITE); mobidb-lite (MOBIDB_LITE); mobidb-lite (MOBIDB_LITE); mobidb-lite (MOBIDB_LITE); PTHR12132:SF7 (PANTHER); IPR007232 (PANTHER); SSF54768 (SUPERFAMILY)	P:GO:0006281; P:GO:0006310	P:DNA repair; P:DNA recombination
[INTERPRO, BLASTED, MAPPED, ANNOTATED]	gene_ID_unitig23_6	A0A1L0BLJ6_9ASCOCIC11C00000005476 OS=	433	20	0	78.3	6	C:GO:0005634; F:GO:0005524; F:GO:0019781; C:GO:0005829; P:GO:0045116; F:GO:0016881	C:nucleus; F:ATP binding; F:NEDD8 activating enzyme activity; C:cytosol; P:protein neddylation; F:acid-amino acid ligase activity	IPR014929 (SMART); G3DSA:3.40.50.720 (GENE3D); IPR014929 (G3DSA:3.10.20.GENE3D); IPR014929 (PFAM); IPR000594 (PFAM); PTHR10953 (PANTHER); IPR030468 (PTHR10953:PANTHER); IPR033127 (PROSITE_PATTERNS); cd01488 (CDD); IPR000594 (SUPERFAMILY)	F:GO:0005524; F:GO:0019781; P:GO:0045116; F:GO:0016881; F:GO:0008641	F:ATP binding; F:NEDD8 activating enzyme activity; P:protein neddylation; F:acid-amino acid ligase activity; F:small protein activating enzyme activity
[INTERPRO, BLASTED, MAPPED, ANNOTATED]	gene_ID_unitig23_7	A0A1A0HHZ6_9ASCOAlpha beta-hydrolase OS=Metschnikowia bicuspidata bicuspidata NRRL YB-4993 GN=METBIDRAFT_38622 PE=4 SV=1	429	20	0	77.45	3	F:GO:0004623; P:GO:0035965; C:GO:0005743	F:phospholipase A2 activity; P:cardiolipin acyl-chain remodeling; C:mitochondrial inner membrane	EC:3.1.1.1; EC:3.1.1.4	Carboxylesterase; Phospholipase A(2)	IPR000073 (PFAM); IPR029058 (G3DSA:3.40.50.GENE3D); PTHR42886:SF1 (PANTHER); PTHR42886 (PANTHER); IPR029058 (SUPERFAMILY)	no GO terms
[INTERPRO, BLASTED, MAPPED, ANNOTATED]	gene_ID_unitig23_8	A0A1L0BAU0_9ASCOCIC11C00000002763 OS=	621	20	0	81.15	10	C:GO:0033573; F:GO:0005381; F:GO:0005507; P:GO:1901684; P:GO:0006827; C:GO:0016021; P:GO:0046688; P:GO:0055114; F:GO:0004322; P:GO:0033215	C:high-affinity iron permease complex; F:iron ion transmembrane transporter activity; F:copper ion binding; P:arsenate ion transmembrane transport; P:high-affinity iron ion transmembrane transport; C:integral component of membrane; P:response to copper ion; P:oxidation-reduction process; F:ferroxidase activity; P:iron assimilation by reduction and transport	EC:1.16.3.1; EC:1.16.3	Ferroxidase; Oxidizing metal ions	IPR011707 (PFAM); IPR011706 (PFAM); IPR001117 (PFAM); IPR008972 (G3DSA:2.60.40.GENE3D); IPR008972 (G3DSA:2.60.40.GENE3D); IPR008972 (G3DSA:2.60.40.GENE3D); PTHR11709:SF197 (PANTHER); PTHR11709 (PANTHER); IPR033138 (PROSITE_PATTERNS); IPR002355 (PROSITE_PATTERNS); IPR033138 (PROSITE_PATTERNS); cd13877 (CDD); cd13899 (CDD); cd13851 (CDD); IPR008972 (SUPERFAMILY); IPR008972 (SUPERFAMILY); IPR008972 …	F:GO:0005507; F:GO:0016491; P:GO:0055114
[INTERPRO, BLASTED, MAPPED, ANNOTATED]	gene_ID_unitig23_9	A0A1L0G611_9ASCOCIC11C00000002386 OS=	183	20	2.4678e-132	95.5	8	C:GO:0032040; F:GO:0030515; P:GO:0042274; C:GO:0034457; C:GO:0019013; P:GO:0006364; C:GO:0005840; F:GO:0019843	C:small-subunit processome; F:snoRNA binding; P:ribosomal small subunit bio_	genesis; C:Mpp10 complex; C:viral nucleocapsid; P:rRNA processing; C:ribosome; F:rRNA binding	IPR001912 (SMART); IPR002942 (PFAM); IPR001912 (PFAM); IPR002942 (G3DSA:3.10.290.GENE3D); IPR022801 (PANTHER); PTHR11831:SF18 (PANTHER); IPR002942 (PROSITE_PROFILES); cd00165 (CDD); SSF55174 (SUPERFAMILY)	F:GO:0003723; F:GO:0019843; C:GO:0005622	F:RNA binding; F:rRNA binding; C:intracellular
[INTERPRO, BLASTED, MAPPED]	gene_ID_unitig23_10	A0A1L0BLA8_9ASCOCIC11C00000003827 OS=	686	20	1.66905e-177	49.3	4	P:GO:0008150; C:GO:0016020; C:GO:0016021; F:GO:0003674	P:biological_process; C:membrane; C:integral component of membrane; F:molecular_function	mobidb-lite (MOBIDB_LITE); mobidb-lite (MOBIDB_LITE); mobidb-lite (MOBIDB_LITE); mobidb-lite (MOBIDB_LITE); TMhelix (TMHMM)	no GO terms	no GO terms
[INTERPRO, BLASTED, MAPPED, ANNOTATED]	gene_ID_unitig23_11	A0A1L0BKW3_9ASCOCIC11C00000000042 OS=	711	20	0	69.4	5	F:GO:0000293; P:GO:0006826; F:GO:0008823; C:GO:0005886; C:GO:0009986	F:ferric-chelate reductase activity; P:iron ion transport; F:cupric reductase activity; C:plasma membrane; C:cell surface	EC:1.16.1; EC:1.16.1.7	Oxidizing metal ions; Ferric-chelate reductase (NADH)	IPR013112 (PFAM); G3DSA:3.40.50.80 (GENE3D); IPR013130 (PFAM); IPR013121 (PFAM); G3DSA:2.40.30.10 (GENE3D),SFLDG01168 (SFLD),SFLDS00052 (SFLD); mobidb-lite (MOBIDB_LITE); PTHR32361:SF19 (PANTHER); PTHR32361 (PANTHER); IPR017927 (PROSITE_PROFILES); cd06186 (CDD); SSF52343 (SUPERFAMILY); IPR017938 (SUPERFAMILY); TMhelix (TMHMM); TMhelix (TMHMM); TMhelix (TMHMM); TMhelix (TMHMM); TMhelix (TMHMM)	F:GO:0016491; P:GO:0055114
[INTERPRO, BLASTED]	gene_ID_unitig23_12	A0A1L0DHW5_9ASCOCIC11C00000000919 OS=	164	5	4.97256e-35	58	Coil (COILS); Coil (COILS); Coil (COILS); mobidb-lite (MOBIDB_LITE)	no GO terms	no GO terms
[INTERPRO, BLASTED, MAPPED]	gene_ID_unitig23_13	A0A1L0G5Z9_9ASCOCIC11C00000005925 OS=	221	20	1.33254e-83	57.1	7	F:GO:0004402; C:GO:0005634; C:GO:0005737; P:GO:0061187; P:GO:0016573; F:GO:0016740; F:GO:0008080	F:histone acetyltransferase activity; C:nucleus; C:cytoplasm; P:regulation of chromatin silencing at rDNA; P:histone acetylation; F:transferase activity; F:N-acetyltransferase activity	G3DSA:3.40.630.30 (GENE3D); IPR000182 (PFAM); PTHR20531 (PANTHER); PTHR20531:SF3 (PANTHER); IPR000182 (PROSITE_PROFILES); cd04301 (CDD); IPR016181 (SUPERFAMILY)	F:GO:0008080	F:N-acetyltransferase activity
[INTERPRO, BLASTED, MAPPED, ANNOTATED]	gene_ID_unitig23_14	A0A1L0BPB6_9ASCOCIC11C00000004718 OS=	2394	20	0	55.75	4	C:GO:0016020; C:GO:0005783; C:GO:0044446; P:GO:0006810	C:membrane; C:endoplasmic reticulum; C:intracellular organelle part; P:transport	Coil (COILS); IPR024340 (PFAM); IPR024298 (PFAM); mobidb-lite (MOBIDB_LITE); mobidb-lite (MOBIDB_LITE); mobidb-lite (MOBIDB_LITE); mobidb-lite (MOBIDB_LITE); mobidb-lite (MOBIDB_LITE); mobidb-lite (MOBIDB_LITE); mobidb-lite (MOBIDB_LITE); mobidb-lite (MOBIDB_LITE); mobidb-lite (MOBIDB_LITE); mobidb-lite (MOBIDB_LITE); PTHR13402:SF17 (PANTHER); IPR024880 (PANTHER); cd09233 (CDD)	P:GO:0048208	P:COPII vesicle coating
[INTERPRO, BLASTED, MAPPED, ANNOTATED]	gene_ID_unitig23_15	A0A1L0D673_9ASCOCIC11C00000002752 OS=	480	20	0	54.25	5	C:GO:0005634; F:GO:0003677; P:GO:0006351; P:GO:0006355; F:GO:0046983	C:nucleus; F:DNA binding; P:transcription, DNA-templated; P:regulation of transcription, DNA-templated; F:protein dimerization activity	IPR002100 (PRINTS); IPR002100 (SMART); IPR002100 (G3DSA:3.40.1810.GENE3D); IPR002100 (PFAM); mobidb-lite (MOBIDB_LITE); mobidb-lite (MOBIDB_LITE); mobidb-lite (MOBIDB_LITE); mobidb-lite (MOBIDB_LITE); PTHR11945 (PANTHER); PTHR11945:SF308 (PANTHER); IPR002100 (PROSITE_PROFILES); IPR002100 (SUPERFAMILY)	F:GO:0003677; F:GO:0046983	F:DNA binding; F:protein dimerization activity
[INTERPRO, BLASTED, MAPPED, ANNOTATED]	gene_ID_unitig23_16	C4Y811_CLAL440S ribosomal S6 OS=Clavispora lusitaniae (strain ATCC 42720) GN=CLUG_04339 PE=3 SV=1	236	20	9.35645e-169	94.6	3	F:GO:0003735; C:GO:0005840; P:GO:0006412	F:structural constituent of ribosome; C:ribosome; P:translation	IPR001377 (SMART); IPR014401 (PIRSF); IPR001377 (PFAM); PTHR11502:SF11 (PANTHER); IPR001377 (PANTHER); IPR018282 (PROSITE_PATTERNS)	F:GO:0003735; C:GO:0005840; C:GO:0005622; P:GO:0006412	F:structural constituent of ribosome; C:ribosome; C:intracellular; P:translation
[INTERPRO, BLASTED, MAPPED, ANNOTATED]	gene_ID_unitig23_17	A0A1A0HIV8_9ASCOPre-mRNA splicing factor OS=Metschnikowia bicuspidata bicuspidata NRRL YB-4993 GN=METBIDRAFT_38261 PE=4 SV=1	417	20	0	65.8	2	C:GO:0005634; P:GO:0006396	C:nucleus; P:RNA processing	IPR000061 (SMART); IPR000061 (PFAM); IPR022030 (PFAM); mobidb-lite (MOBIDB_LITE); PTHR15316 (PANTHER); PTHR15316:SF7 (PANTHER); IPR000061 (PROSITE_PROFILES); IPR000061 (PROSITE_PROFILES); IPR000061 (SUPERFAMILY); IPR000061 (SUPERFAMILY)	F:GO:0003723; P:GO:0006396	F:RNA binding; P:RNA processing
[INTERPRO, BLASTED, MAPPED]	gene_ID_unitig23_18	A0A1A0HDY7_9ASCOZinc finger 2 OS=Metschnikowia bicuspidata bicuspidata NRRL YB-4993 GN=METBIDRAFT_40431 PE=4 SV=1	371	20	2.08282e-18	48.05	12	F:GO:0003676; C:GO:0005634; F:GO:0008270; P:GO:0097236; F:GO:0046872; C:GO:0016020; C:GO:0016021; F:GO:0000977; P:GO:0006366; P:GO:0034225; P:GO:0045944; F:GO:0000981	F:nucleic acid binding; C:nucleus; F:zinc ion binding; P:positive regulation of transcription from RNA polymerase II promoter in response to zinc ion starvation; F:metal ion binding; C:membrane; C:integral component of membrane; F:RNA polymerase II regulatory region sequence-specific DNA binding; P:transcription from RNA polymerase II promoter; P:regulation of transcription from RNA polymerase II…	IPR013087 (SMART); G3DSA:3.30.160.60 (GENE3D); IPR022755 (PFAM); G3DSA:3.30.160.60 (GENE3D); G3DSA:2.20.28.30 (GENE3D); G3DSA:3.30.160.60 (GENE3D); G3DSA:3.30.160.60 (GENE3D); PF00096 (PFAM); IPR013083 (G3DSA:3.30.40.GENE3D); PTHR24390:SF50 (PANTHER); PTHR24390 (PANTHER); IPR013087 (PROSITE_PATTERNS); IPR013087 (PROSITE_PATTERNS); IPR013087 (PROSITE_PATTERNS); IPR013087 (PROSITE_PATTERNS); IPR013…	F:GO:0003676	F:nucleic acid binding
[INTERPRO, BLASTED, MAPPED, ANNOTATED]	gene_ID_unitig23_19	A0A1L0BL91_9ASCOCIC11C00000004757 OS=	1139	20	0	67	1	F:GO:0046872	F:metal ion binding	IPR004274 (SMART); IPR001841 (SMART); IPR004274 (PFAM); PF14599 (PFAM); IPR001841 (PFAM); IPR011948 (TIGRFAM); IPR023214 (G3DSA:3.40.50.GENE3D); G3DSA:2.20.28.10 (GENE3D); IPR013083 (G3DSA:3.30.40.GENE3D); IPR008913 (PFAM); mobidb-lite (MOBIDB_LITE); mobidb-lite (MOBIDB_LITE); mobidb-lite (MOBIDB_LITE); mobidb-lite (MOBIDB_LITE); mobidb-lite (MOBIDB_LITE); PTHR21319 (PANTHER); PTHR21319:SF24 (PAN…	F:GO:0008270; F:GO:0016791	F:zinc ion binding; F:phosphatase activity
[INTERPRO, BLASTED, MAPPED, ANNOTATED]	gene_ID_unitig23_20	A0A1A0HHY1_9ASCOPLP-dependent transferase OS=Metschnikowia bicuspidata bicuspidata NRRL YB-4993 GN=METBIDRAFT_34283 PE=4 SV=1	961	20	0	70.4	2	F:GO:0008483; P:GO:0008152	F:transaminase activity; P:metabolic process	IPR000796 (PRINTS); IPR015422 (G3DSA:3.90.1150.GENE3D); IPR004839 (PFAM); IPR015421 (G3DSA:3.40.640.GENE3D); IPR000796 (PANTHER); cd00609 (CDD); IPR015424 (SUPERFAMILY)	F:GO:0030170; F:GO:0003824; F:GO:0008483; P:GO:0006520; P:GO:0009058	F:pyridoxal phosphate binding; F:catalytic activity; F:transaminase activity; P:cellular amino acid metabolic process; P:biosynthetic process
[INTERPRO, BLASTED, MAPPED, ANNOTATED]	gene_ID_unitig23_21	A0A1L0BPD0_9ASCOCIC11C00000001620 OS=	593	20	7.33605e-115	72.65	14	P:GO:0006351; P:GO:0035690; P:GO:1900189; P:GO:0007155; P:GO:0044114; P:GO:0009405; P:GO:0006357; P:GO:0031505; C:GO:0005634; F:GO:0003677; P:GO:0030447; F:GO:0046872; P:GO:0044011; P:GO:0070417	P:transcription, DNA-templated; P:cellular response to drug; P:positive regulation of cell adhesion involved in single-species biofilm formation; P:cell adhesion; P:development of symbiont in host; P:patho_	genesis; P:regulation of transcription from RNA polymerase II promoter; P:fungal-type cell wall organization; C:nucleus; F:DNA binding; P:filamentous growth; F:metal ion binding; P:single-species biofilm formation on inanimate substrate; P:cellular response to cold	IPR013087 (SMART); G3DSA:3.30.160.60 (GENE3D); G3DSA:3.30.160.60 (GENE3D); PF00096 (PFAM); mobidb-lite (MOBIDB_LITE); mobidb-lite (MOBIDB_LITE); mobidb-lite (MOBIDB_LITE); mobidb-lite (MOBIDB_LITE); mobidb-lite (MOBIDB_LITE); PTHR14596 (PANTHER); PTHR14596:SF41 (PANTHER); IPR013087 (PROSITE_PATTERNS); IPR013087 (PROSITE_PATTERNS); IPR013087 (PROSITE_PROFILES); IPR013087 (PROSITE_PROFILES); IPR013…	F:GO:0003676	F:nucleic acid binding
[INTERPRO, BLASTED, MAPPED, ANNOTATED]	gene_ID_unitig23_22	C4Y802_CLAL4Malate dehydrogenase OS=Clavispora lusitaniae (strain ATCC 42720) GN=CLUG_04330 PE=3 SV=1	331	20	0	94.25	8	P:GO:0005975; F:GO:0030060; P:GO:0006108; C:GO:0005759; F:GO:0003729; P:GO:0006099; P:GO:0001302; P:GO:0001300	P:carbohydrate metabolic process; F:L-malate dehydrogenase activity; P:malate metabolic process; C:mitochondrial matrix; F:mRNA binding; P:tricarboxylic acid cycle; P:replicative cell aging; P:chronological cell aging	EC:1.1.1.37	Malate dehydrogenase	G3DSA:3.40.50.720 (GENE3D); IPR010097 (TIGRFAM); IPR001557 (PIRSF); IPR022383 (PFAM); G3DSA:3.90.110.10 (GENE3D); IPR001236 (PFAM); PTHR11540 (PANTHER); IPR001252 (PROSITE_PATTERNS); cd01337 (CDD); IPR016040 (SUPERFAMILY); IPR015955 (SUPERFAMILY)	P:GO:0005975; F:GO:0030060; F:GO:0016615; P:GO:0006108; F:GO:0016616; F:GO:0016491; F:GO:0003824; P:GO:0006099; P:GO:0055114; P:GO:0019752
[INTERPRO, BLASTED, MAPPED, ANNOTATED]	gene_ID_unitig23_23	A0A1L0DN67_9ASCOCIC11C00000000754 OS=	208	20	4.14314e-95	67.5	2	C:GO:0005737; P:GO:0035690	C:cytoplasm; P:cellular response to drug	IPR027485 (G3DSA:3.30.700.GENE3D); IPR002733 (PFAM); IPR023473 (TIGRFAM); G3DSA:3.30.1490.150 (GENE3D); IPR023473 (PANTHER); PTHR13016:SF5 (PANTHER); IPR002733 (PROSITE_PROFILES); IPR002733 (SUPERFAMILY)	no GO terms	no GO terms
[INTERPRO, BLASTED, MAPPED]	gene_ID_unitig23_24	A0A1A0H5U4_9ASCOOuter arm dynein light chain 1 OS=Metschnikowia bicuspidata bicuspidata NRRL YB-4993 GN=METBIDRAFT_13577 PE=4 SV=1	403	20	2.39879e-168	48.2	8	P:GO:0008150; F:GO:0003824; F:GO:0016849; C:GO:0005575; F:GO:0003674; P:GO:0035556; P:GO:0009190; C:GO:0005622	P:biological_process; F:catalytic activity; F:phosphorus-oxygen lyase activity; C:cellular_component; F:molecular_function; P:intracellular signal transduction; P:cyclic nucleotide biosynthetic process; C:intracellular	IPR003591 (SMART); IPR001611 (PFAM); IPR025875 (PFAM); IPR032675 (G3DSA:3.80.10.GENE3D); IPR032675 (G3DSA:3.80.10.GENE3D); PTHR24373 (PANTHER); IPR001611 (PROSITE_PROFILES); IPR001611 (PROSITE_PROFILES); IPR001611 (PROSITE_PROFILES); IPR001611 (PROSITE_PROFILES); IPR001611 (PROSITE_PROFILES); IPR001611 (PROSITE_PROFILES); SSF52075 (SUPERFAMILY)	F:GO:0005515	F:protein binding
[INTERPRO, BLASTED, MAPPED, ANNOTATED]	gene_ID_unitig23_25	A0A1L0DAM9_9ASCOCIC11C00000005895 OS=	349	20	2.89885e-111	71.4	1	C:GO:0016020	C:membrane	IPR028209 (SMART); IPR028209 (PFAM)	P:GO:0071230; P:GO:0007040; C:GO:0031902; P:GO:0032439; C:GO:0045121; C:GO:0071986; P:GO:0043410; P:GO:0042632; P:GO:0032008; P:GO:0001919	P:cellular response to amino acid stimulus; P:lysosome organization; C:late endosome membrane; P:endosome localization; C:membrane raft; C:Ragulator complex; P:positive regulation of MAPK cascade; P:cholesterol homeostasis; P:positive regulation of TOR signaling; P:regulation of receptor recycling
[INTERPRO, BLASTED, MAPPED]	gene_ID_unitig23_26	A0A1L0DN59_9ASCOCIC11C00000003446 OS=	395	20	5.71896e-119	55.65	4	P:GO:0043161; P:GO:0045721; P:GO:0007089; C:GO:0034657	P:proteasome-mediated ubiquitin-dependent protein catabolic process; P:negative regulation of gluconeo_	genesis; P:traversing start control point of mitotic cell cycle; C:GID complex	IPR006595 (SMART); IPR013144 (SMART); IPR006594 (SMART); IPR024964 (PFAM); IPR006594 (PFAM); mobidb-lite (MOBIDB_LITE); mobidb-lite (MOBIDB_LITE); PTHR12864:SF32 (PANTHER); PTHR12864 (PANTHER); IPR006595 (PROSITE_PROFILES); IPR006594 (PROSITE_PROFILES)	F:GO:0005515	F:protein binding
[INTERPRO, BLASTED, MAPPED, ANNOTATED]	gene_ID_unitig23_27	A0A1A0H5T2_9ASCOGlycoside hydrolase OS=Metschnikowia bicuspidata bicuspidata NRRL YB-4993 GN=METBIDRAFT_33465 PE=4 SV=1	832	20	0	72.9	6	F:GO:0003824; C:GO:0005783; P:GO:0044238; P:GO:0044710; P:GO:0071704; P:GO:0009987	F:catalytic activity; C:endoplasmic reticulum; P:primary metabolic process; P:single-organism metabolic process; P:organic substance metabolic process; P:cellular process	IPR031335 (PFAM); IPR031631 (PFAM); G3DSA:1.50.10.10 (GENE3D); IPR004888 (PANTHER); PTHR10412:SF13 (PANTHER); IPR008928 (SUPERFAMILY); TMhelix (TMHMM)	F:GO:0003824; F:GO:0004573; P:GO:0009311	F:catalytic activity; F:mannosyl-oligosaccharide glucosidase activity; P:oligosaccharide metabolic process
[INTERPRO, BLASTED, MAPPED, ANNOTATED]	gene_ID_unitig23_28	A0A1A0H5T9_9ASCOMetallo-hydrolase oxidoreductase OS=Metschnikowia bicuspidata bicuspidata NRRL YB-4993 GN=METBIDRAFT_221098 PE=4 SV=1	255	20	1.05516e-171	81.6	2	F:GO:0004416; P:GO:0019243	F:hydroxyacylglutathione hydrolase activity; P:methylglyoxal catabolic process to D-lactate via S-lactoyl-glutathione	EC:3.1.2.6	Hydroxyacylglutathione hydrolase	IPR001279 (SMART); IPR001279 (G3DSA:3.60.15.GENE3D); IPR032282 (PFAM); IPR001279 (PFAM); PTHR11935 (PANTHER); PTHR11935:SF119 (PANTHER); IPR001279 (SUPERFAMILY)	no GO terms
[INTERPRO, BLASTED, MAPPED, ANNOTATED]	gene_ID_unitig23_29	A0A1A0H5F7_9ASCO -tyrosine phosphatase OS=Metschnikowia bicuspidata bicuspidata NRRL YB-4993 GN=METBIDRAFT_79798 PE=4 SV=1	214	20	2.88982e-115	76.25	2	F:GO:0004725; P:GO:0035335	F:protein tyrosine phosphatase activity; P:peptidyl-tyrosine dephosphorylation	EC:3.1.3.16; EC:3.1.3.48; EC:3.1.3.41	Protein-serine/threonine phosphatase; Protein-tyrosine-phosphatase; 4-nitrophenylphosphatase	IPR020428 (PRINTS); IPR029021 (G3DSA:3.90.190.GENE3D); IPR004861 (PFAM); mobidb-lite (MOBIDB_LITE); PTHR31126:SF24 (PANTHER); PTHR31126 (PANTHER); IPR029021 (SUPERFAMILY)	F:GO:0004725
[INTERPRO, BLASTED, MAPPED]	gene_ID_unitig23_30	A0A1A0H5N8_9ASCOVhr-1domain-containing OS=Metschnikowia bicuspidata bicuspidata NRRL YB-4993 GN=METBIDRAFT_79797 PE=4 SV=1	570	20	0	58.6	5	P:GO:0090502; F:GO:0004525; P:GO:0090501; F:GO:0003723; P:GO:0006396	P:RNA phosphodiester bond hydrolysis, endonucleolytic; F:ribonuclease III activity; P:RNA phosphodiester bond hydrolysis; F:RNA binding; P:RNA processing	IPR000999 (G3DSA:1.10.1520.GENE3D); IPR007147 (PFAM); mobidb-lite (MOBIDB_LITE); mobidb-lite (MOBIDB_LITE); PD936484 (PRODOM)	F:GO:0004525; P:GO:0006396	F:ribonuclease III activity; P:RNA processing
[INTERPRO, BLASTED, MAPPED, ANNOTATED]	gene_ID_unitig23_31	A0A1A0H5B0_9ASCOArgininosuccinate synthase OS=Metschnikowia bicuspidata bicuspidata NRRL YB-4993 GN=METBIDRAFT_33462 PE=3 SV=1	416	20	0	95.2	4	F:GO:0005524; P:GO:0006526; C:GO:0005829; F:GO:0004055	F:ATP binding; P:arginine biosynthetic process; C:cytosol; F:argininosuccinate synthase activity	EC:6.3.4.5	Argininosuccinate synthase	IPR024074 (G3DSA:3.90.1260.GENE3D); G3DSA:1.20.5.470 (GENE3D); IPR014729 (G3DSA:3.40.50.GENE3D); IPR001518 (PFAM); IPR001518 (TIGRFAM); PTHR11587:SF7 (PANTHER); IPR001518 (PANTHER); IPR018223 (PROSITE_PATTERNS); IPR018223 (PROSITE_PATTERNS); IPR023434 (HAMAP); IPR023434 (CDD); SSF69864 (SUPERFAMILY); SSF52402 (SUPERFAMILY)	F:GO:0005524; P:GO:0006526; F:GO:0004055
[INTERPRO, BLASTED, MAPPED]	gene_ID_unitig23_32	Q6BXJ5_DEBHADEHA2B02442p OS=Debaryomyces hansenii (strain ATCC 36239 CBS 767 JCM 1990 NBRC 0083 IGC 2968) GN=DEHA2B02442g PE=4 SV=2	1049	20	0	56.2	6	P:GO:0008150; C:GO:0016020; C:GO:0016021; C:GO:0005783; C:GO:0005575; F:GO:0003674	P:biological_process; C:membrane; C:integral component of membrane; C:endoplasmic reticulum; C:cellular_component; F:molecular_function	Coil (COILS); PF13515 (PFAM); IPR018820 (PFAM); IPR018823 (PFAM); mobidb-lite (MOBIDB_LITE); PTHR37994 (PANTHER); TMhelix (TMHMM); TMhelix (TMHMM); TMhelix (TMHMM); TMhelix (TMHMM); TMhelix (TMHMM); TMhelix (TMHMM); TMhelix (TMHMM); TMhelix (TMHMM); TMhelix (TMHMM); TMhelix (TMHMM); TMhelix (TMHMM)	no GO terms	no GO terms
[INTERPRO, BLASTED, MAPPED, ANNOTATED]	gene_ID_unitig23_33	A0A1A0H5S6_9ASCOClavaminate synthase OS=Metschnikowia bicuspidata bicuspidata NRRL YB-4993 GN=METBIDRAFT_13568 PE=4 SV=1	569	20	0	70.55	3	F:GO:0051213; F:GO:0046872; P:GO:0016577	F:dioxygenase activity; F:metal ion binding; P:histone demethylation	IPR003347 (SMART); IPR001965 (SMART); IPR013083 (G3DSA:3.30.40.GENE3D); PF13621 (PFAM); G3DSA:2.60.120.650 (GENE3D); mobidb-lite (MOBIDB_LITE); PTHR23123 (PANTHER); IPR019786 (PROSITE_PATTERNS); IPR019787 (PROSITE_PROFILES); IPR003347 (PROSITE_PROFILES); cd15517 (CDD); SSF51197 (SUPERFAMILY); IPR011011 (SUPERFAMILY)	no GO terms	no GO terms
[INTERPRO, BLASTED, MAPPED, ANNOTATED]	gene_ID_unitig23_34	A0A1A0H5T4_9ASCOAlpha-ketoacid dehydrogenase kinase OS=Metschnikowia bicuspidata bicuspidata NRRL YB-4993 GN=METBIDRAFT_33460 PE=4 SV=1	431	20	0	77.35	4	C:GO:0005739; F:GO:0004740; P:GO:0018105; P:GO:0015976	C:mitochondrion; F:pyruvate dehydrogenase (acetyl-transferring) kinase activity; P:peptidyl-serine phosphorylation; P:carbon utilization	EC:2.7.11.2	[Pyruvate dehydrogenase (acetyl-transferring)] kinase	IPR003594 (SMART); IPR018955 (G3DSA:1.20.140.GENE3D); IPR003594 (PFAM); IPR003594 (G3DSA:3.30.565.GENE3D); IPR018955 (PFAM); PTHR11947 (PANTHER); PTHR11947:SF28 (PANTHER); IPR005467 (PROSITE_PROFILES); cd00075 (CDD); IPR018955 (SUPERFAMILY); IPR003594 (SUPERFAMILY)	no GO terms
[INTERPRO, BLASTED, MAPPED, ANNOTATED]	gene_ID_unitig23_35	A0A1L0BKM4_9ASCOCIC11C00000003821 OS=	645	20	0	57.3	1	C:GO:0044424	C:intracellular part	IPR018556 (PFAM); mobidb-lite (MOBIDB_LITE); mobidb-lite (MOBIDB_LITE); PTHR13357:SF4 (PANTHER); PTHR13357 (PANTHER)	no GO terms	no GO terms
[INTERPRO, BLASTED, MAPPED, ANNOTATED]	gene_ID_unitig23_36	A0A1L0G624_9ASCOCIC11C00000001516 OS=	1227	20	0	75	6	C:GO:0005634; P:GO:0006629; F:GO:0004861; F:GO:0008081; P:GO:0071901; P:GO:0006796	C:nucleus; P:lipid metabolic process; F:cyclin-dependent protein serine/threonine kinase inhibitor activity; F:phosphoric diester hydrolase activity; P:negative regulation of protein serine/threonine kinase activity; P:phosphate-containing compound metabolic process	IPR002110 (SMART); IPR004331 (PFAM); IPR020683 (G3DSA:1.25.40.GENE3D); IPR020683 (PFAM); IPR017946 (G3DSA:3.20.20.GENE3D); IPR020683 (G3DSA:1.25.40.GENE3D); IPR020683 (G3DSA:1.25.40.GENE3D); mobidb-lite (MOBIDB_LITE); PTHR10783:SF56 (PANTHER); PTHR10783 (PANTHER); IPR002110 (PROSITE_PROFILES); IPR030395 (PROSITE_PROFILES); IPR004331 (PROSITE_PROFILES); IPR002110 (PROSITE_PROFILES); IPR020683 (PRO…	F:GO:0005515; P:GO:0006629; F:GO:0008081	F:protein binding; P:lipid metabolic process; F:phosphoric diester hydrolase activity
[INTERPRO, BLASTED, MAPPED, ANNOTATED]	gene_ID_unitig23_37	A0A1L0BP92_9ASCOCIC11C00000001248 OS=	214	20	1.15824e-106	81.15	7	C:GO:0005634; P:GO:0006405; C:GO:0005737; P:GO:0006606; P:GO:0000082; F:GO:0008536; P:GO:0006511	C:nucleus; P:RNA export from nucleus; C:cytoplasm; P:protein import into nucleus; P:G1/S transition of mitotic cell cycle; F:Ran GTPase binding; P:ubiquitin-dependent protein catabolic process	IPR000156 (SMART); IPR011993 (G3DSA:2.30.29.GENE3D); IPR000156 (PFAM); mobidb-lite (MOBIDB_LITE); PTHR23138 (PANTHER); IPR000156 (PROSITE_PROFILES); cd13179 (CDD); IPR011993 (SUPERFAMILY)	P:GO:0046907	P:intracellular transport
[INTERPRO, BLASTED, MAPPED, ANNOTATED]	gene_ID_unitig23_38	A0A1L0BKX6_9ASCOCIC11C00000000479 OS=	1079	20	0	89.7	8	P:GO:0006406; C:GO:0005634; P:GO:0000055; C:GO:0005816; P:GO:0034501; F:GO:0008565; C:GO:0000776; F:GO:0008536	P:mRNA export from nucleus; C:nucleus; P:ribosomal large subunit export from nucleus; C:spindle pole body; P:protein localization to kinetochore; F:protein transporter activity; C:kinetochore; F:Ran GTPase binding	IPR014877 (SMART); IPR001494 (SMART); IPR001494 (PFAM); IPR011989 (G3DSA:1.25.10.GENE3D); IPR011989 (G3DSA:1.25.10.GENE3D); IPR014877 (PFAM); IPR013598 (PFAM); PTHR11223 (PANTHER); PTHR11223:SF9 (PANTHER); IPR001494 (PROSITE_PROFILES); IPR016024 (SUPERFAMILY)	P:GO:0006886; F:GO:0005488; F:GO:0008536	P:intracellular protein transport; F:binding; F:Ran GTPase binding
[INTERPRO, BLASTED, MAPPED, ANNOTATED]	gene_ID_unitig23_39	A0A1A0H5S9_9ASCOMalate dehydrogenase OS=Metschnikowia bicuspidata bicuspidata NRRL YB-4993 GN=METBIDRAFT_46687 PE=3 SV=1	335	20	0	88.35	7	P:GO:0006094; P:GO:0016558; F:GO:0030060; P:GO:0006108; C:GO:0005739; C:GO:0005829; P:GO:0006099	P:gluconeo_	genesis; P:protein import into peroxisome matrix; F:L-malate dehydrogenase activity; P:malate metabolic process; C:mitochondrion; C:cytosol; P:tricarboxylic acid cycle	EC:1.1.1.37	Malate dehydrogenase	G3DSA:3.90.110.10 (GENE3D); IPR022383 (PFAM); IPR010097 (TIGRFAM); IPR001557 (PIRSF); IPR001236 (PFAM); G3DSA:3.40.50.720 (GENE3D); PTHR11540:SF33 (PANTHER); PTHR11540 (PANTHER); IPR001252 (PROSITE_PATTERNS); cd01337 (CDD); IPR015955 (SUPERFAMILY); IPR016040 (SUPERFAMILY)
[INTERPRO, BLASTED, MAPPED, ANNOTATED]	gene_ID_unitig23_40	A0A1A0H5E7_9ASCOTrehalase OS=Metschnikowia bicuspidata bicuspidata NRRL YB-4993 GN=METBIDRAFT_47123 PE=3 SV=1	1217	20	0	79.95	5	P:GO:0030437; F:GO:0005509; P:GO:1903134; C:GO:0005829; F:GO:0004555	P:ascospore formation; F:calcium ion binding; P:trehalose catabolic process involved in cellular response to stress; C:cytosol; F:alpha,alpha-trehalase activity	EC:3.2.1.28	Alpha,alpha-trehalase	IPR001661 (PRINTS); G3DSA:1.50.10.10 (GENE3D); IPR011120 (PFAM); IPR008949 (G3DSA:1.10.600.GENE3D); IPR001661 (PFAM); IPR000092 (PFAM); mobidb-lite (MOBIDB_LITE); IPR001661 (PANTHER); PTHR23403:SF17 (PANTHER); IPR033749 (PROSITE_PATTERNS); IPR033749 (PROSITE_PATTERNS); IPR018232 (PROSITE_PATTERNS); IPR018232 (PROSITE_PATTERNS); cd00685 (CDD); IPR008928 (SUPERFAMILY); IPR008949 (SUPERFAMILY)	C:GO:0005737; F:GO:0003824; F:GO:0005509; P:GO:0005991; P:GO:0008299; P:GO:0005993; F:GO:0004555
[INTERPRO, BLASTED, MAPPED, ANNOTATED]	gene_ID_unitig23_41	A0A1A0H5A1_9ASCOTranslation OS=Metschnikowia bicuspidata bicuspidata NRRL YB-4993 GN=METBIDRAFT_46942 PE=3 SV=1	282	20	6.67164e-178	76.45	3	F:GO:0003735; C:GO:0005840; P:GO:0006412	F:structural constituent of ribosome; C:ribosome; P:translation	IPR000597 (PFAM); IPR019927 (TIGRFAM); G3DSA:4.10.960.10 (GENE3D); PTHR11229:SF7 (PANTHER); IPR019927 (PANTHER); IPR019926 (PROSITE_PATTERNS); IPR009000 (SUPERFAMILY)	F:GO:0003735; C:GO:0005840; C:GO:0005622; P:GO:0006412	F:structural constituent of ribosome; C:ribosome; C:intracellular; P:translation
[INTERPRO, BLASTED, MAPPED, ANNOTATED]	gene_ID_unitig23_42	A0A1A0H5R8_9ASCORibosomal L6 OS=Metschnikowia bicuspidata bicuspidata NRRL YB-4993 GN=METBIDRAFT_13558 PE=3 SV=1	219	20	6.69118e-131	75.7	5	C:GO:0005634; F:GO:0003735; F:GO:0019843; C:GO:0005762; P:GO:0006412	C:nucleus; F:structural constituent of ribosome; F:rRNA binding; C:mitochondrial large ribosomal subunit; P:translation	IPR019906 (PRINTS); IPR000702 (PIRSF); IPR020040 (G3DSA:3.90.930.GENE3D); IPR020040 (PFAM); IPR020040 (G3DSA:3.90.930.GENE3D); IPR000702 (PANTHER); IPR019906 (PTHR11655:PANTHER); IPR002358 (PROSITE_PATTERNS); IPR020040 (SUPERFAMILY); IPR020040 (SUPERFAMILY)	F:GO:0003735; F:GO:0019843; C:GO:0005840; C:GO:0005622; P:GO:0006412	F:structural constituent of ribosome; F:rRNA binding; C:ribosome; C:intracellular; P:translation
[INTERPRO, BLASTED, MAPPED, ANNOTATED]	gene_ID_unitig23_43	A0A1A0H5S4_9ASCOClathrin mu subunit OS=Metschnikowia bicuspidata bicuspidata NRRL YB-4993 GN=METBIDRAFT_46821 PE=3 SV=1	522	20	0	62.9	2	P:GO:0046907; P:GO:0015031	P:intracellular transport; P:protein transport	IPR001392 (PRINTS); IPR001392 (PIRSF); G3DSA:3.30.450.60 (GENE3D); G3DSA:2.60.40.1170 (GENE3D); IPR028565 (PFAM); PTHR10529 (PANTHER); PTHR10529:SF295 (PANTHER); IPR028565 (PROSITE_PROFILES); cd09252 (CDD); IPR011012 (SUPERFAMILY); IPR028565 (SUPERFAMILY)	P:GO:0016192; C:GO:0030131; P:GO:0006886; P:GO:0006810	P:vesicle-mediated transport; C:clathrin adaptor complex; P:intracellular protein transport; P:transport
[INTERPRO, BLASTED, MAPPED, ANNOTATED]	gene_ID_unitig23_44	Q6BJ56_DEBHADEHA2G05038p OS=Debaryomyces hansenii (strain ATCC 36239 CBS 767 JCM 1990 NBRC 0083 IGC 2968) GN=DEHA2G05038g PE=4 SV=2	87	20	6.65615e-32	82.7	4	P:GO:0050790; C:GO:0030176; P:GO:0019348; F:GO:0030234	P:regulation of catalytic activity; C:integral component of endoplasmic reticulum membrane; P:dolichol metabolic process; F:enzyme regulator activity	IPR009914 (PFAM); IPR009914 (PANTHER); TMhelix (TMHMM); TMhelix (TMHMM)	C:GO:0030176; P:GO:0019348; F:GO:0030234	C:integral component of endoplasmic reticulum membrane; P:dolichol metabolic process; F:enzyme regulator activity
[INTERPRO, BLASTED, MAPPED, ANNOTATED]	gene_ID_unitig23_45	A0A1L0G6C7_9ASCOCIC11C00000001651 OS=	1060	20	0	70.85	1	C:GO:0044464	C:cell part	IPR001680 (SMART); IPR015943 (G3DSA:2.130.10.GENE3D); IPR015943 (G3DSA:2.130.10.GENE3D); IPR015943 (G3DSA:2.130.10.GENE3D); IPR013905 (PFAM); mobidb-lite (MOBIDB_LITE); PTHR10241 (PANTHER); PTHR10241:SF36 (PANTHER); IPR017986 (SUPERFAMILY); IPR011047 (SUPERFAMILY)	F:GO:0005515	F:protein binding
[INTERPRO, BLASTED, MAPPED]	gene_ID_unitig23_46	A0A1L0BCJ2_9ASCOCIC11C00000003507 OS=	423	17	1.88324e-111	55.47	3	P:GO:0008150; C:GO:0005575; F:GO:0003674	P:biological_process; C:cellular_component; F:molecular_function	Coil (COILS); Coil (COILS); G3DSA:1.20.120.520 (GENE3D); mobidb-lite (MOBIDB_LITE); mobidb-lite (MOBIDB_LITE)	no GO terms	no GO terms
[INTERPRO, BLASTED, MAPPED, ANNOTATED]	gene_ID_unitig23_47	A0A1A0H5R9_9ASCOZincin OS=Metschnikowia bicuspidata bicuspidata NRRL YB-4993 GN=METBIDRAFT_79781 PE=3 SV=1	1237	20	0	76.65	4	F:GO:0046872; C:GO:0005739; P:GO:0006508; F:GO:0004222	F:metal ion binding; C:mitochondrion; P:proteolysis; F:metalloendopeptidase activity	EC:3.4.24	Acting on peptide bonds (peptidases)	Coil (COILS); Coil (COILS); IPR002317 (PRINTS); IPR015866 (PFAM); G3DSA:1.10.1370.10 (GENE3D); G3DSA:1.10.287.40 (GENE3D); IPR002314 (PFAM); IPR024080 (G3DSA:1.20.1050.GENE3D); G3DSA:3.30.930.10 (GENE3D); IPR001567 (PFAM); IPR002317 (TIGRFAM); PTHR11804 (PANTHER); IPR033851 (PTHR11804:PANTHER); IPR006195 (PROSITE_PROFILES); IPR033851 (CDD); IPR010978 (SUPERFAMILY); SSF55681 (SUPERFAMILY); SSF5548…	F:GO:0000166; F:GO:0005524; P:GO:0006418; P:GO:0006627; F:GO:0004812; C:GO:0005737; C:GO:0005759; P:GO:0006508; F:GO:0004828; F:GO:0004222; P:GO:0006434
[INTERPRO, BLASTED, MAPPED, ANNOTATED]	gene_ID_unitig23_48	A0A1A0H5E0_9ASCOPkinase-domain-containing (Fragment) OS=Metschnikowia bicuspidata bicuspidata NRRL YB-4993 GN=METBIDRAFT_27756 PE=4 SV=1	889	20	0	70.1	8	C:GO:0005634; F:GO:0005524; P:GO:0000196; C:GO:0032153; C:GO:0051286; C:GO:0005829; F:GO:0004674; C:GO:0044732	C:nucleus; F:ATP binding; P:MAPK cascade involved in cell wall organization or bio_	genesis; C:cell division site; C:cell tip; C:cytosol; F:protein serine/threonine kinase activity; C:mitotic spindle pole body	EC:2.7.11	Transferring phosphorus-containing groups	IPR000719 (SMART); IPR000719 (PFAM); G3DSA:1.10.510.10 (GENE3D); G3DSA:3.30.200.20 (GENE3D); mobidb-lite (MOBIDB_LITE); mobidb-lite (MOBIDB_LITE); mobidb-lite (MOBIDB_LITE); mobidb-lite (MOBIDB_LITE); mobidb-lite (MOBIDB_LITE); mobidb-lite (MOBIDB_LITE); PTHR24356 (PANTHER); PTHR24356:SF290 (PANTHER); IPR017441 (PROSITE_PATTERNS); IPR008271 (PROSITE_PATTERNS); IPR000719 (PROSITE_PROFILES); cd0558…
[INTERPRO, BLASTED, MAPPED, ANNOTATED]	gene_ID_unitig23_49	A0A1L0BKY2_9ASCOCIC11C00000001998 OS=	189	20	1.39359e-80	67.85	1	C:GO:0005737	C:cytoplasm	IPR019171 (PFAM); IPR016805 (PIRSF); PTHR31905 (PANTHER); PTHR31905:SF3 (PANTHER)	no GO terms	no GO terms
[INTERPRO, BLASTED, MAPPED]	gene_ID_unitig23_50	A0A1L0D8S0_9ASCOCIC11C00000001318 OS=	709	20	0	54.2	3	P:GO:0008150; C:GO:0005575; F:GO:0003674	P:biological_process; C:cellular_component; F:molecular_function	IPR019734 (SMART); IPR011990 (G3DSA:1.25.40.GENE3D); mobidb-lite (MOBIDB_LITE); mobidb-lite (MOBIDB_LITE); IPR013026 (PROSITE_PROFILES); IPR011990 (SUPERFAMILY)	F:GO:0005515	F:protein binding
[INTERPRO, BLASTED, MAPPED, ANNOTATED]	gene_ID_unitig23_51	A0A1L0BLL5_9ASCOCIC11C00000001633 OS=	199	20	5.19316e-136	94.9	3	C:GO:0005770; P:GO:0006623; P:GO:0032511	C:late endosome; P:protein targeting to vacuole; P:late endosome to vacuole transport via multivesicular body sorting pathway	Coil (COILS); IPR005024 (PFAM); G3DSA:3.90.20.10 (GENE3D); PTHR10476:SF24 (PANTHER); PTHR10476 (PANTHER)	P:GO:0007034	P:vacuolar transport
[INTERPRO, BLASTED, MAPPED, ANNOTATED]	gene_ID_unitig23_52	A0A1A0H5R4_9ASCOSuperoxide dismutase OS=Metschnikowia bicuspidata bicuspidata NRRL YB-4993 GN=METBIDRAFT_46645 PE=3 SV=1	224	20	1.57186e-156	87.85	7	P:GO:0001320; C:GO:0005759; P:GO:0019430; F:GO:0030145; P:GO:0055114; F:GO:0004784; P:GO:0001302	P:age-dependent response to reactive oxygen species involved in chronological cell aging; C:mitochondrial matrix; P:removal of superoxide radicals; F:manganese ion binding; P:oxidation-reduction process; F:superoxide dismutase activity; P:replicative cell aging	EC:1.15.1.1	Superoxide dismutase	IPR001189 (PRINTS); IPR001189 (PIRSF); IPR019831 (PFAM); G3DSA:1.10.287.990 (GENE3D); IPR019832 (PFAM); PTHR11404 (PANTHER); PTHR11404:SF28 (PANTHER); IPR019833 (PROSITE_PATTERNS); IPR019832 (SUPERFAMILY); IPR019831 (SUPERFAMILY)	P:GO:0006801; F:GO:0046872; P:GO:0055114; F:GO:0004784
[INTERPRO, BLASTED, MAPPED, ANNOTATED]	gene_ID_unitig23_53	A0A1L0BCI5_9ASCOVacuolar sorting-associated 17 OS=	552	20	0	73.15	5	P:GO:0016192; P:GO:0046907; C:GO:0016020; P:GO:0015031; C:GO:0044424	P:vesicle-mediated transport; P:intracellular transport; C:membrane; P:protein transport; C:intracellular part	IPR001683 (G3DSA:3.30.1520.GENE3D); IPR014461 (PIRSF); G3DSA:1.20.1270.60 (GENE3D); IPR001683 (PFAM); IPR015404 (PFAM); mobidb-lite (MOBIDB_LITE); PTHR10555 (PANTHER); PTHR10555:SF189 (PANTHER); cd06891 (CDD); IPR001683 (SUPERFAMILY)	C:GO:0030904; P:GO:0015031; F:GO:0035091; P:GO:0042147	C:retromer complex; P:protein transport; F:phosphatidylinositol binding; P:retrograde transport, endosome to Golgi
[INTERPRO, BLASTED, MAPPED, ANNOTATED]	gene_ID_unitig23_54	A0A1A0H5M0_9ASCOMitochondrial carrier OS=Metschnikowia bicuspidata bicuspidata NRRL YB-4993 GN=METBIDRAFT_33446 PE=4 SV=1	539	20	0	66.3	2	C:GO:0005739; C:GO:0016021	C:mitochondrion; C:integral component of membrane	IPR023395 (G3DSA:1.50.40.GENE3D); mobidb-lite (MOBIDB_LITE); mobidb-lite (MOBIDB_LITE); IPR023395 (SUPERFAMILY)	no GO terms	no GO terms
[INTERPRO, BLASTED, MAPPED, ANNOTATED]	gene_ID_unitig23_55	A0A1A0H586_9ASCOKinase OS=Metschnikowia bicuspidata bicuspidata NRRL YB-4993 GN=METBIDRAFT_33445 PE=4 SV=1	807	20	0	89.2	39	P:GO:0036178; P:GO:0036170; P:GO:1900233; P:GO:1900433; P:GO:0006468; P:GO:0007118; F:GO:0005524; C:GO:0030428; P:GO:0034605; P:GO:0071470; C:GO:0051285; P:GO:0097248; C:GO:0005829; P:GO:0031579; P:GO:0036244; F:GO:0042802; P:GO:0036168; P:GO:0061246; P:GO:0035690; P:GO:0000902; C:GO:0043332; P:GO:0036180; P:GO:1900442; P:GO:0000920; P:GO:0000226; P:GO:0009267; F:GO:0004674; C:GO:0001411; P:GO:00…	P:filamentous growth of a population of unicellular organisms in response to neutral pH; P:filamentous growth of a population of unicellular organisms in response to starvation; P:positive regulation of single-species biofilm formation on inanimate substrate; P:positive regulation of filamentous growth of a population of unicellular organisms in response to heat; P:protein phosphorylation; P:budd…	genesis; C:mating projection tip; P:filamentous growth of a population of unicellular organisms in response to biotic stimulus; P:positive regulation of filamentous growth of a population of unicellular organisms in response to neutral pH; P:cell separation after cytokinesis; P:microtubule cytoskeleton organization; P:cellular response to starvation; F:protein serine/threonine kinase activity; C:…	EC:2.7.11	Transferring phosphorus-containing groups	Coil (COILS); Coil (COILS); IPR000719 (SMART); IPR000961 (SMART); G3DSA:1.10.510.10 (GENE3D); G3DSA:3.30.200.20 (GENE3D); IPR000719 (PFAM); mobidb-lite (MOBIDB_LITE); mobidb-lite (MOBIDB_LITE); mobidb-lite (MOBIDB_LITE); mobidb-lite (MOBIDB_LITE); PTHR24356 (PANTHER); PTHR24356:SF259 (PANTHER); IPR008271 (PROSITE_PATTERNS); IPR017441 (PROSITE_PATTERNS); IPR000719 (PROSITE_PROFILES); IPR000961 (PR…
[INTERPRO, BLASTED, MAPPED, ANNOTATED]	gene_ID_unitig23_56	A0A1L0DQX2_9ASCOCIC11C00000004475 OS=	631	20	0	67	1	C:GO:0016020	C:membrane	IPR018827 (PFAM); IPR018825 (PFAM); mobidb-lite (MOBIDB_LITE); PTHR31685:SF5 (PANTHER); PTHR31685 (PANTHER); TMhelix (TMHMM); TMhelix (TMHMM); TMhelix (TMHMM); TMhelix (TMHMM); TMhelix (TMHMM); TMhelix (TMHMM); TMhelix (TMHMM); TMhelix (TMHMM); TMhelix (TMHMM)	no GO terms	no GO terms
[INTERPRO, BLASTED, MAPPED, ANNOTATED]	gene_ID_unitig23_57	A0A1A0H5Q9_9ASCOHomocysteine S-methyltransferase OS=Metschnikowia bicuspidata bicuspidata NRRL YB-4993 GN=METBIDRAFT_33444 PE=4 SV=1	332	20	0	61	1	F:GO:0016740	F:transferase activity	IPR003726 (G3DSA:3.20.20.GENE3D); IPR003726 (PFAM); PTHR21091:SF140 (PANTHER); PTHR21091 (PANTHER); IPR003726 (PROSITE_PROFILES); IPR003726 (SUPERFAMILY)	no GO terms	no GO terms
[INTERPRO, BLASTED, MAPPED, ANNOTATED]	gene_ID_unitig23_58	A0A1L0DEC1_9ASCOCIC11C00000001561 OS=	960	20	0	74.7	7	C:GO:0005634; C:GO:0005846; P:GO:0045292; C:GO:0072686; F:GO:0000339; C:GO:0005829; P:GO:0051028	C:nucleus; C:nuclear cap binding complex; P:mRNA cis splicing, via spliceosome; C:mitotic spindle; F:RNA cap binding; C:cytosol; P:mRNA transport	IPR003890 (PFAM); G3DSA:1.25.40.180 (GENE3D); G3DSA:1.25.40.180 (GENE3D); IPR015174 (PFAM); G3DSA:1.25.40.180 (GENE3D); IPR015172 (PFAM); mobidb-lite (MOBIDB_LITE); IPR027159 (PANTHER); IPR016024 (SUPERFAMILY); IPR016024 (SUPERFAMILY); IPR016024 (SUPERFAMILY)	P:GO:0016070; C:GO:0005846; P:GO:0045292; F:GO:0003723; F:GO:0005515; F:GO:0000339; F:GO:0005488; P:GO:0051028	P:RNA metabolic process; C:nuclear cap binding complex; P:mRNA cis splicing, via spliceosome; F:RNA binding; F:protein binding; F:RNA cap binding; F:binding; P:mRNA transport
[INTERPRO, BLASTED, MAPPED, ANNOTATED]	gene_ID_unitig23_59	A0A1A0H5L5_9ASCOp-loop containing nucleoside triphosphate hydrolase OS=Metschnikowia bicuspidata bicuspidata NRRL YB-4993 GN=METBIDRAFT_47071 PE=4 SV=1	321	20	0	81.35	6	F:GO:0016887; C:GO:0005634; F:GO:0005524; C:GO:0005829; C:GO:0030014; P:GO:0006357	F:ATPase activity; C:nucleus; F:ATP binding; C:cytosol; C:CCR4-NOT complex; P:regulation of transcription from RNA polymerase II promoter	EC:3.6.1.3; EC:3.6.1.15	Adenosinetriphosphatase; Nucleoside-triphosphate phosphatase	IPR003593 (SMART); G3DSA:3.40.50.300 (GENE3D); IPR003439 (PFAM); PTHR12847 (PANTHER); PTHR12847:SF8 (PANTHER); IPR003439 (PROSITE_PROFILES); IPR027417 (SUPERFAMILY)	F:GO:0016887; F:GO:0005524
[INTERPRO, BLASTED, MAPPED, ANNOTATED]	gene_ID_unitig23_60	A0A1A0H5P7_9ASCONucleoside diphosphate kinase OS=Metschnikowia bicuspidata bicuspidata NRRL YB-4993 GN=METBIDRAFT_60608 PE=3 SV=1	152	20	2.04177e-108	94.5	11	C:GO:0005634; F:GO:0005524; C:GO:0005758; F:GO:0042802; P:GO:0006228; P:GO:0061508; P:GO:0006241; P:GO:0006183; C:GO:0005829; F:GO:0004550; P:GO:0006974	C:nucleus; F:ATP binding; C:mitochondrial intermembrane space; F:identical protein binding; P:UTP biosynthetic process; P:CDP phosphorylation; P:CTP biosynthetic process; P:GTP biosynthetic process; C:cytosol; F:nucleoside diphosphate kinase activity; P:cellular response to DNA damage stimulus	EC:2.7.4.6	Nucleoside-diphosphate kinase	IPR001564 (PRINTS); IPR001564 (SMART); IPR001564 (PFAM); IPR034907 (G3DSA:3.30.70.GENE3D); PTHR11349:SF83 (PANTHER); PTHR11349 (PANTHER); IPR023005 (PROSITE_PATTERNS); IPR001564 (HAMAP); cd04413 (CDD); IPR034907 (SUPERFAMILY)	P:GO:0006228; P:GO:0006241; P:GO:0006183; P:GO:0006165; F:GO:0004550
[INTERPRO, BLASTED, MAPPED, ANNOTATED]	gene_ID_unitig23_61	A0A1A0H5Q4_9ASCOWD40 repeat OS=Metschnikowia bicuspidata bicuspidata NRRL YB-4993 GN=METBIDRAFT_79767 PE=4 SV=1	645	20	0	74.95	6	P:GO:0000122; F:GO:0003712; P:GO:0016573; F:GO:0017025; P:GO:0045944; C:GO:0000124	P:negative regulation of transcription from RNA polymerase II promoter; F:transcription cofactor activity; P:histone acetylation; F:TBP-class protein binding; P:positive regulation of transcription from RNA polymerase II promoter; C:SAGA complex	IPR001680 (SMART); IPR015943 (G3DSA:2.130.10.GENE3D); IPR001680 (PFAM); IPR015943 (G3DSA:2.130.10.GENE3D); mobidb-lite (MOBIDB_LITE); mobidb-lite (MOBIDB_LITE); PTHR19855 (PANTHER); PTHR19855:SF13 (PANTHER); IPR017986 (PROSITE_PROFILES); IPR001680 (PROSITE_PROFILES); IPR017986 (SUPERFAMILY)	F:GO:0005515	F:protein binding
[INTERPRO, BLASTED, MAPPED]	gene_ID_unitig23_62	A0A1L0DRC9_9ASCOCIC11C00000002280 OS=	639	20	0	56.75	4	P:GO:0016192; C:GO:0016020; C:GO:0016021; C:GO:0005622	P:vesicle-mediated transport; C:membrane; C:integral component of membrane; C:intracellular	IPR000195 (SMART); G3DSA:1.10.8.270 (GENE3D); IPR000195 (PFAM); mobidb-lite (MOBIDB_LITE); PTHR20913:SF12 (PANTHER); PTHR20913 (PANTHER); IPR000195 (PROSITE_PROFILES); IPR000195 (SUPERFAMILY)	no GO terms	no GO terms
[INTERPRO, BLASTED, MAPPED, ANNOTATED]	gene_ID_unitig23_63	A0A1A0H5L0_9ASCOTrimethyllysine dioxygenase OS=Metschnikowia bicuspidata bicuspidata NRRL YB-4993 GN=METBIDRAFT_46766 PE=4 SV=1	369	20	0	83.9	6	F:GO:0031418; F:GO:0050353; C:GO:0005737; F:GO:0005506; P:GO:0055114; P:GO:0045329	F:L-ascorbic acid binding; F:trimethyllysine dioxygenase activity; C:cytoplasm; F:iron ion binding; P:oxidation-reduction process; P:carnitine biosynthetic process	EC:1.14.11; EC:1.14.11.8	Acting on paired donors, with incorporation or reduction of molecular oxygen. The oxygen incorporated need not be derived from O(2); Trimethyllysine dioxygenase	G3DSA:3.60.130.10 (GENE3D); IPR003819 (PFAM); IPR012776 (TIGRFAM); PTHR10696:SF38 (PANTHER); PTHR10696 (PANTHER); cd00250 (CDD); SSF51197 (SUPERFAMILY)	F:GO:0050353; F:GO:0016491; F:GO:0005506; P:GO:0055114; P:GO:0045329
[INTERPRO, BLASTED, MAPPED, ANNOTATED]	gene_ID_unitig23_64	A0A1A0H576_9ASCOAldo keto reductase OS=Metschnikowia bicuspidata bicuspidata NRRL YB-4993 GN=METBIDRAFT_33438 PE=4 SV=1	318	20	0	88.3	9	P:GO:0071470; P:GO:0019388; F:GO:0003729; P:GO:0034599; P:GO:0055114; P:GO:0019568; F:GO:0032866; F:GO:0047935; P:GO:0042843	P:cellular response to osmotic stress; P:galactose catabolic process; F:mRNA binding; P:cellular response to oxidative stress; P:oxidation-reduction process; P:arabinose catabolic process; F:D-xylose:NADP reductase activity; F:glucose -1dehydrogenase (NADP+) activity; P:D-xylose catabolic process	EC:1.1.1.21; EC:1.1.1.119; EC:1.1.1.2	Aldehyde reductase; Glucose -1dehydrogenase (NADP(+)); Alcohol dehydrogenase (NADP(+))	IPR020471 (PRINTS); IPR020471 (PIRSF); IPR023210 (G3DSA:3.20.20.GENE3D); IPR023210 (PFAM); PTHR11732:SF321 (PANTHER); IPR020471 (PANTHER); IPR018170 (PROSITE_PATTERNS); IPR018170 (PROSITE_PATTERNS); IPR018170 (PROSITE_PATTERNS); IPR023210 (CDD); IPR023210 (SUPERFAMILY)	F:GO:0016491; P:GO:0055114
[INTERPRO, BLASTED, MAPPED, ANNOTATED]	gene_ID_unitig23_65	A0A1A0H5P2_9ASCOActin-related 2 3 complex subunit 5 OS=Metschnikowia bicuspidata bicuspidata NRRL YB-4993 GN=METBIDRAFT_46419 PE=3 SV=1	155	20	4.0588e-96	82.7	14	C:GO:0031097; P:GO:0035690; C:GO:0043332; F:GO:0005198; P:GO:0000147; C:GO:0005885; P:GO:0000001; C:GO:0005634; C:GO:0005826; P:GO:0034314; C:GO:0005829; F:GO:0003729; C:GO:0031315; C:GO:0030479	C:medial cortex; P:cellular response to drug; C:mating projection tip; F:structural molecule activity; P:actin cortical patch assembly; C:Arp2/3 protein complex; P:mitochondrion inheritance; C:nucleus; C:actomyosin contractile ring; P:Arp2/3 complex-mediated actin nucleation; C:cytosol; F:mRNA binding; C:extrinsic component of mitochondrial outer membrane; C:actin cortical patch	IPR006789 (PIRSF); IPR006789 (G3DSA:1.25.40.GENE3D); IPR006789 (PFAM); IPR006789 (PANTHER); PTHR12644:SF4 (PANTHER); IPR006789 (SUPERFAMILY)	P:GO:0030833; C:GO:0015629; P:GO:0034314; C:GO:0005885	P:regulation of actin filament polymerization; C:actin cytoskeleton; P:Arp2/3 complex-mediated actin nucleation; C:Arp2/3 protein complex
[INTERPRO, BLASTED, MAPPED]	gene_ID_unitig23_66	A0A1A0H5P9_9ASCODUF1892-domain-containing OS=Metschnikowia bicuspidata bicuspidata NRRL YB-4993 GN=METBIDRAFT_220720 PE=4 SV=1	134	20	5.41309e-58	75.2	2	P:GO:0008150; F:GO:0003674	P:biological_process; F:molecular_function	IPR015080 (G3DSA:3.10.20.GENE3D); IPR015080 (PFAM); mobidb-lite (MOBIDB_LITE); IPR015080 (SUPERFAMILY)	no GO terms	no GO terms
[INTERPRO, BLASTED, MAPPED, ANNOTATED]	gene_ID_unitig23_67	A0A1A0H5B9_9ASCOGlucose-6-phosphate isomerase OS=Metschnikowia bicuspidata bicuspidata NRRL YB-4993 GN=METBIDRAFT_46720 PE=3 SV=1	553	20	0	89.5	5	F:GO:0004347; P:GO:0006094; P:GO:0006098; C:GO:0005739; P:GO:0006096	F:glucose-6-phosphate isomerase activity; P:gluconeo_	genesis; P:pentose-phosphate shunt; C:mitochondrion; P:glycolytic process	EC:5.3.1.9	Glucose-6-phosphate isomerase	IPR001672 (PRINTS); IPR001672 (PFAM); IPR023096 (G3DSA:1.10.1390.GENE3D); G3DSA:3.40.50.10490 (GENE3D); G3DSA:3.40.50.10490 (GENE3D); G3DSA:3.40.50.10490 (GENE3D); IPR001672 (PANTHER); PTHR11469:SF17 (PANTHER); IPR018189 (PROSITE_PATTERNS); IPR018189 (PROSITE_PATTERNS); IPR001672 (HAMAP); IPR001672 (PROSITE_PROFILES); cd05016 (CDD); cd05015 (CDD); SSF53697 (SUPERFAMILY)
[INTERPRO, BLASTED]	gene_ID_unitig23_68	A0A1L0BUK2_9ASCOCIC11C00000001751 OS=	310	9	8.1685e-68	48.11	Coil (COILS); mobidb-lite (MOBIDB_LITE)	no GO terms	no GO terms
[INTERPRO, BLASTED, MAPPED]	gene_ID_unitig23_69	A0A1L0GF84_9ASCOCIC11C00000001323 OS=	351	20	1.18087e-106	50.35	5	P:GO:0008150; C:GO:0016020; C:GO:0016021; C:GO:0005575; F:GO:0003674	P:biological_process; C:membrane; C:integral component of membrane; C:cellular_component; F:molecular_function	no IPS match	no IPS match	no IPS match
[INTERPRO, BLASTED, MAPPED, ANNOTATED]	gene_ID_unitig23_70	A0A1L0BUB9_9ASCOCIC11C00000000714 OS=	774	20	0	57.4	1	P:GO:0006355	P:regulation of transcription, DNA-templated	IPR001138 (G3DSA:4.10.240.GENE3D); mobidb-lite (MOBIDB_LITE); PTHR31001:SF74 (PANTHER); PTHR31001 (PANTHER); IPR001138 (PROSITE_PATTERNS); IPR001138 (CDD); IPR001138 (SUPERFAMILY)	C:GO:0005634; F:GO:0008270; P:GO:0006355; F:GO:0000981	C:nucleus; F:zinc ion binding; P:regulation of transcription, DNA-templated; F:RNA polymerase II transcription factor activity, sequence-specific DNA binding
[INTERPRO, BLASTED, MAPPED, ANNOTATED]	gene_ID_unitig23_71	A0A1A0H5P4_9ASCOCation efflux family OS=Metschnikowia bicuspidata bicuspidata NRRL YB-4993 GN=METBIDRAFT_74370 PE=4 SV=1	554	20	0	72.25	3	P:GO:0006812; P:GO:0055085; C:GO:0016020	P:cation transport; P:transmembrane transport; C:membrane	G3DSA:1.20.1510.10 (GENE3D); IPR027470 (G3DSA:3.30.70.GENE3D); IPR002524 (PFAM); IPR002524 (TIGRFAM); mobidb-lite (MOBIDB_LITE); PTHR43840 (PANTHER); PTHR43840:SF14 (PANTHER); SSF160240 (SUPERFAMILY); SSF161111 (SUPERFAMILY); TMhelix (TMHMM); TMhelix (TMHMM); TMhelix (TMHMM); TMhelix (TMHMM); TMhelix (TMHMM)	P:GO:0055085; P:GO:0006812; C:GO:0016021; F:GO:0008324	P:transmembrane transport; P:cation transport; C:integral component of membrane; F:cation transmembrane transporter activity
[INTERPRO, BLASTED, MAPPED, ANNOTATED]	gene_ID_unitig23_72	A0A1A0H5B5_9ASCOActin-related 2 3 subunit 1 OS=Metschnikowia bicuspidata bicuspidata NRRL YB-4993 GN=METBIDRAFT_13529 PE=4 SV=1	640	20	0	84.3	8	C:GO:0032153; C:GO:0051286; F:GO:0043130; P:GO:0000281; P:GO:0034314; C:GO:0005829; C:GO:0030479; C:GO:0005885	C:cell division site; C:cell tip; F:ubiquitin binding; P:mitotic cytokinesis; P:Arp2/3 complex-mediated actin nucleation; C:cytosol; C:actin cortical patch; C:Arp2/3 protein complex	IPR001680 (SMART); IPR001680 (PFAM); IPR015943 (G3DSA:2.130.10.GENE3D); IPR024977 (PFAM); mobidb-lite (MOBIDB_LITE); IPR017383 (PANTHER); PTHR10709:SF20 (PANTHER); IPR001680 (PROSITE_PROFILES); IPR017986 (PROSITE_PROFILES); IPR017986 (SUPERFAMILY); TMhelix (TMHMM); TMhelix (TMHMM); TMhelix (TMHMM); TMhelix (TMHMM)	P:GO:0030833; F:GO:0005515; C:GO:0015629; P:GO:0034314; C:GO:0005885	P:regulation of actin filament polymerization; F:protein binding; C:actin cytoskeleton; P:Arp2/3 complex-mediated actin nucleation; C:Arp2/3 protein complex
[INTERPRO, BLASTED, MAPPED, ANNOTATED]	gene_ID_unitig23_73	A0A1L0BUD0_9ASCOCIC11C00000000276 OS=	139	20	8.41017e-31	59.05	4	C:GO:0015630; C:GO:0044430; P:GO:0022402; C:GO:0000776	C:microtubule cytoskeleton; C:cytoskeletal part; P:cell cycle process; C:kinetochore	IPR013965 (PFAM); mobidb-lite (MOBIDB_LITE); PTHR28017 (PANTHER)	C:GO:0072686; C:GO:0042729; P:GO:0008608	C:mitotic spindle; C:DASH complex; P:attachment of spindle microtubules to kinetochore
[INTERPRO, BLASTED, MAPPED, ANNOTATED]	gene_ID_unitig23_74	A0A1A0H5N1_9ASCOAdenylosuccinate lyase OS=Metschnikowia bicuspidata bicuspidata NRRL YB-4993 GN=METBIDRAFT_46842 PE=3 SV=1	481	20	0	94.6	7	F:GO:0004018; C:GO:0005634; P:GO:0044208; P:GO:0006189; C:GO:0005829; F:GO:0070626; P:GO:0006106	F:N6-(1,2-dicarboxyethyl)AMP AMP-lyase (fumarate-forming) activity; C:nucleus; P:'de novo' AMP biosynthetic process; P:'de novo' IMP biosynthetic process; C:cytosol; F:(S)-2-(5-amino--1(5-phospho-D-ribosyl)imidazole-4-carboxamido)succinate AMP-lyase (fumarate-forming) activity; P:fumarate metabolic process	EC:4.3.2.2	Adenylosuccinate lyase	Coil (COILS); IPR000362 (PRINTS); IPR019468 (SMART); G3DSA:1.20.200.10 (GENE3D); IPR019468 (PFAM); IPR024083 (G3DSA:1.10.275.GENE3D); IPR022761 (PFAM); IPR004769 (TIGRFAM); PTHR43172 (PANTHER); IPR020557 (PROSITE_PATTERNS); cd03302 (CDD); IPR008948 (SUPERFAMILY)	F:GO:0004018; P:GO:0009152; F:GO:0003824
[INTERPRO, BLASTED, MAPPED]	gene_ID_unitig23_75	A0A1L0BX54_9ASCOCIC11C00000005787 OS=	472	20	0	57.7	3	P:GO:0008150; C:GO:0005575; F:GO:0003674	P:biological_process; C:cellular_component; F:molecular_function	mobidb-lite (MOBIDB_LITE); mobidb-lite (MOBIDB_LITE); mobidb-lite (MOBIDB_LITE)	no GO terms	no GO terms
[INTERPRO, NO-BLAST]	gene_ID_unitig23_76	---NA---	247	mobidb-lite (MOBIDB_LITE)	no GO terms	no GO terms
[INTERPRO, BLASTED, MAPPED, ANNOTATED]	gene_ID_unitig23_77	A0A1L0DQZ7_9ASCOCIC11C00000005072 OS=	333	20	6.16794e-38	77.35	7	C:GO:0030428; C:GO:0005618; C:GO:0016021; P:GO:0007155; C:GO:0005576; P:GO:0009405; C:GO:0005886	C:cell septum; C:cell wall; C:integral component of membrane; P:cell adhesion; C:extracellular region; P:patho_	genesis; C:plasma membrane	IPR007567 (PFAM); G3DSA:1.20.5.510 (GENE3D); mobidb-lite (MOBIDB_LITE); mobidb-lite (MOBIDB_LITE); TMhelix (TMHMM); TMhelix (TMHMM)	no GO terms	no GO terms
[INTERPRO, BLASTED, MAPPED, ANNOTATED]	gene_ID_unitig23_78	A0A1A0HIA8_9ASCOGlutamate dehydrogenase OS=Metschnikowia bicuspidata bicuspidata NRRL YB-4993 GN=METBIDRAFT_38239 PE=3 SV=1	451	20	0	92.05	4	F:GO:0016639; C:GO:0005829; P:GO:0006520; P:GO:0055114	F:oxidoreductase activity, acting on the CH-NH2 group of donors, NAD or NADP as acceptor; C:cytosol; P:cellular amino acid metabolic process; P:oxidation-reduction process	IPR006095 (PRINTS); IPR006096 (SMART); IPR006096 (PFAM); IPR006097 (PFAM); G3DSA:1.10.285.10 (GENE3D); IPR014362 (PIRSF); G3DSA:3.40.50.10860 (GENE3D); G3DSA:3.40.50.720 (GENE3D); PTHR43571 (PANTHER); IPR033524 (PROSITE_PATTERNS); IPR033922 (CDD); IPR016040 (SUPERFAMILY); SSF53223 (SUPERFAMILY)	F:GO:0016491; F:GO:0016639; P:GO:0006520; P:GO:0055114; F:GO:0004352	F:oxidoreductase activity; F:oxidoreductase activity, acting on the CH-NH2 group of donors, NAD or NADP as acceptor; P:cellular amino acid metabolic process; P:oxidation-reduction process; F:glutamate dehydrogenase (NAD+) activity
[INTERPRO, BLASTED, MAPPED, ANNOTATED]	gene_ID_unitig23_79	A0A1L0DLA8_9ASCOCIC11C00000000101 OS=	450	20	0	68.3	2	P:GO:0045039; C:GO:0042721	P:protein import into mitochondrial inner membrane; C:mitochondrial inner membrane protein insertion complex	Coil (COILS); Coil (COILS); IPR021056 (PFAM); mobidb-lite (MOBIDB_LITE); PTHR12358 (PANTHER); IPR021056 (PTHR12358:PANTHER)	no GO terms	no GO terms
[INTERPRO, BLASTED, MAPPED, ANNOTATED]	gene_ID_unitig23_80	A0A1L0C0E3_9ASCOCIC11C00000003287 OS=	405	20	0	76	2	C:GO:0005737; C:GO:0016021	C:cytoplasm; C:integral component of membrane	IPR011629 (PFAM); G3DSA:3.40.50.300 (GENE3D); IPR011629 (G3DSA:3.30.1220.GENE3D); IPR003495 (PFAM); PTHR13748:SF50 (PANTHER); PTHR13748 (PANTHER); IPR027417 (SUPERFAMILY); IPR011629 (SUPERFAMILY)	no GO terms	no GO terms
[INTERPRO, BLASTED, MAPPED, ANNOTATED]	gene_ID_unitig23_81	A0A1A0HIM4_9ASCOMannosyltransferase OS=Metschnikowia bicuspidata bicuspidata NRRL YB-4993 GN=METBIDRAFT_34060 PE=3 SV=1	626	20	0	65.65	2	F:GO:0016740; P:GO:0044710	F:transferase activity; P:single-organism metabolic process	IPR005599 (PFAM); IPR005599 (PANTHER); PTHR22760:SF7 (PANTHER); TMhelix (TMHMM); TMhelix (TMHMM); TMhelix (TMHMM); TMhelix (TMHMM); TMhelix (TMHMM); TMhelix (TMHMM); TMhelix (TMHMM); TMhelix (TMHMM)	F:GO:0016757	F:transferase activity, transferring glycosyl groups
[INTERPRO, BLASTED]	gene_ID_unitig23_82	A0A1L0DKH4_9ASCOCIC11C00000003964 OS=	1279	20	0	43.9	Coil (COILS); IPR013665 (PFAM); mobidb-lite (MOBIDB_LITE)	no GO terms	no GO terms
[INTERPRO, BLASTED, MAPPED, ANNOTATED]	gene_ID_unitig23_83	A0A1A0HIA3_9ASCOPkinase-domain-containing OS=Metschnikowia bicuspidata bicuspidata NRRL YB-4993 GN=METBIDRAFT_36841 PE=4 SV=1	1594	20	0	59.95	6	P:GO:0050794; C:GO:0044464; F:GO:0016301; P:GO:0044699; P:GO:0009987; P:GO:0050896	P:regulation of cellular process; C:cell part; F:kinase activity; P:single-organism process; P:cellular process; P:response to stimulus	IPR000719 (SMART); G3DSA:1.10.150.50 (GENE3D); IPR000719 (PFAM); G3DSA:3.30.200.20 (GENE3D); G3DSA:1.10.510.10 (GENE3D); mobidb-lite (MOBIDB_LITE); mobidb-lite (MOBIDB_LITE); mobidb-lite (MOBIDB_LITE); mobidb-lite (MOBIDB_LITE); mobidb-lite (MOBIDB_LITE); mobidb-lite (MOBIDB_LITE); mobidb-lite (MOBIDB_LITE); mobidb-lite (MOBIDB_LITE); mobidb-lite (MOBIDB_LITE); mobidb-lite (MOBIDB_LITE); mobidb-l…	F:GO:0005524; F:GO:0005515; F:GO:0004672; P:GO:0006468	F:ATP binding; F:protein binding; F:protein kinase activity; P:protein phosphorylation
[INTERPRO, BLASTED, MAPPED, ANNOTATED]	gene_ID_unitig23_84	A0A1L0DKI1_9ASCOCIC11C00000005341 OS=	160	20	1.91977e-80	72.4	1	C:GO:0005840	C:ribosome	IPR028909 (PFAM); PTHR21349 (PANTHER); PTHR21349:SF5 (PANTHER); IPR028909 (SUPERFAMILY)	C:GO:0005840	C:ribosome
[INTERPRO, BLASTED, MAPPED]	gene_ID_unitig23_85	A0A1A0HIA5_9ASCOSAPS-domain-containing OS=Metschnikowia bicuspidata bicuspidata NRRL YB-4993 GN=METBIDRAFT_111985 PE=4 SV=1	931	20	0	72.75	1	F:GO:0003674	F:molecular_function	IPR007587 (PFAM); mobidb-lite (MOBIDB_LITE); mobidb-lite (MOBIDB_LITE); mobidb-lite (MOBIDB_LITE); mobidb-lite (MOBIDB_LITE); IPR007587 (PANTHER)	no GO terms	no GO terms
[INTERPRO, BLASTED, MAPPED, ANNOTATED]	gene_ID_unitig23_86	A0A1A0HI98_9ASCON-terminal nucleophile aminohydrolase OS=Metschnikowia bicuspidata bicuspidata NRRL YB-4993 GN=METBIDRAFT_9967 PE=4 SV=1	354	20	0	88.1	6	C:GO:0005737; F:GO:0008242; P:GO:0006508; P:GO:0006541; P:GO:0006751; F:GO:0016740	C:cytoplasm; F:omega peptidase activity; P:proteolysis; P:glutamine metabolic process; P:glutathione catabolic process; F:transferase activity	EC:3.4.19	Acting on peptide bonds (peptidases)	IPR029055 (G3DSA:3.60.20.GENE3D); IPR026869 (PFAM); PTHR43187 (PANTHER); IPR017932 (PROSITE_PROFILES); cd01908 (CDD); IPR029055 (SUPERFAMILY)	no GO terms
[INTERPRO, BLASTED, MAPPED, ANNOTATED]	gene_ID_unitig23_87	A0A1L0DN93_9ASCOCIC11C00000002194 OS=	990	20	0	76.7	3	F:GO:0003824; P:GO:0008152; C:GO:0016021	F:catalytic activity; P:metabolic process; C:integral component of membrane	IPR017849 (G3DSA:3.40.720.GENE3D); IPR002591 (PFAM); PTHR23071 (PANTHER); PTHR23071:SF2 (PANTHER); IPR017850 (SUPERFAMILY); TMhelix (TMHMM); TMhelix (TMHMM); TMhelix (TMHMM); TMhelix (TMHMM); TMhelix (TMHMM); TMhelix (TMHMM); TMhelix (TMHMM); TMhelix (TMHMM); TMhelix (TMHMM); TMhelix (TMHMM); TMhelix (TMHMM); TMhelix (TMHMM); TMhelix (TMHMM)	F:GO:0003824; P:GO:0008152	F:catalytic activity; P:metabolic process
[INTERPRO, BLASTED, MAPPED]	gene_ID_unitig23_88	A0A1L0DKI9_9ASCOCIC11C00000001500 OS=	408	20	8.48609e-78	53.35	2	C:GO:0016020; C:GO:0016021	C:membrane; C:integral component of membrane	Coil (COILS); mobidb-lite (MOBIDB_LITE); mobidb-lite (MOBIDB_LITE); mobidb-lite (MOBIDB_LITE)	no GO terms	no GO terms
[INTERPRO, BLASTED, MAPPED, ANNOTATED]	gene_ID_unitig23_89	A0A1L0DL83_9ASCOCIC11C00000001257 OS=	371	20	1.49662e-126	56.65	8	P:GO:0044182; P:GO:0048583; P:GO:0045893; P:GO:0033554; P:GO:0042221; C:GO:0044424; F:GO:0016301; P:GO:0048869	P:filamentous growth of a population of unicellular organisms; P:regulation of response to stimulus; P:positive regulation of transcription, DNA-templated; P:cellular response to stress; P:response to chemical; C:intracellular part; F:kinase activity; P:cellular developmental process	IPR000008 (SMART); IPR000008 (G3DSA:2.60.40.GENE3D); IPR000008 (PFAM); mobidb-lite (MOBIDB_LITE); mobidb-lite (MOBIDB_LITE); mobidb-lite (MOBIDB_LITE); mobidb-lite (MOBIDB_LITE); IPR000008 (PROSITE_PROFILES); IPR000008 (SUPERFAMILY)	no GO terms	no GO terms
[INTERPRO, BLASTED, MAPPED, ANNOTATED]	gene_ID_unitig23_90	A0A1L0DMJ6_9ASCO60S ribosomal L36 OS=	266	20	4.78382e-142	73.45	2	F:GO:0003735; C:GO:0005762	F:structural constituent of ribosome; C:mitochondrial large ribosomal subunit	IPR026569 (PFAM); IPR026569 (G3DSA:2.30.170.GENE3D); PTHR13528:SF7 (PANTHER); IPR026569 (PANTHER); IPR034704 (SUPERFAMILY)	F:GO:0003735	F:structural constituent of ribosome
[INTERPRO, BLASTED, MAPPED, ANNOTATED]	gene_ID_unitig23_91	A0A1A0HI94_9ASCO60S ribosomal L36 OS=Metschnikowia bicuspidata bicuspidata NRRL YB-4993 GN=METBIDRAFT_76691 PE=3 SV=1	99	20	4.88983e-52	86.1	3	F:GO:0003735; C:GO:0005840; P:GO:0006412	F:structural constituent of ribosome; C:ribosome; P:translation	IPR000509 (PFAM); PTHR10114:SF4 (PANTHER); IPR000509 (PANTHER); IPR000509 (PROSITE_PATTERNS)	F:GO:0003735; C:GO:0005840; C:GO:0005622; P:GO:0006412	F:structural constituent of ribosome; C:ribosome; C:intracellular; P:translation
[INTERPRO, BLASTED, MAPPED]	gene_ID_unitig23_92	A0A1L0DYD5_9ASCOCIC11C00000001996 OS=	801	20	0	51.35	3	P:GO:0031929; C:GO:0031931; F:GO:0003674	P:TOR signaling; C:TORC1 complex; F:molecular_function	Coil (COILS); IPR018857 (PFAM); mobidb-lite (MOBIDB_LITE); mobidb-lite (MOBIDB_LITE); mobidb-lite (MOBIDB_LITE)	P:GO:0031929; C:GO:0031931	P:TOR signaling; C:TORC1 complex
[INTERPRO, BLASTED, MAPPED, ANNOTATED]	gene_ID_unitig23_93	A0A1A0HIK8_9ASCOPAB-dependent poly(A)-specific ribonuclease subunit PAN2 OS=Metschnikowia bicuspidata bicuspidata NRRL YB-4993 GN=PAN2 PE=3 SV=1	1196	20	0	68.3	5	F:GO:0003676; P:GO:0090503; P:GO:0016071; F:GO:0004518; P:GO:0006301	F:nucleic acid binding; P:RNA phosphodiester bond hydrolysis, exonucleolytic; P:mRNA metabolic process; F:nuclease activity; P:postreplication repair	IPR013520 (SMART); IPR028881 (PFAM); IPR012337 (G3DSA:3.30.420.GENE3D); IPR013520 (PFAM); IPR015943 (G3DSA:2.130.10.GENE3D); G3DSA:3.90.70.10 (GENE3D); mobidb-lite (MOBIDB_LITE); mobidb-lite (MOBIDB_LITE); PTHR15728 (PANTHER); PTHR15728:SF1 (PANTHER); IPR030843 (HAMAP); IPR028889 (PROSITE_PROFILES); cd06143 (CDD); IPR012337 (SUPERFAMILY); IPR017986 (SUPERFAMILY); SSF54001 (SUPERFAMILY)	F:GO:0003676; F:GO:0004535; F:GO:0005515; C:GO:0031251; P:GO:0006397; P:GO:0000289	F:nucleic acid binding; F:poly(A)-specific ribonuclease activity; F:protein binding; C:PAN complex; P:mRNA processing; P:nuclear-transcribed mRNA poly(A) tail shortening
[INTERPRO, BLASTED]	gene_ID_unitig23_94	A0A1L0DMK3_9ASCOCIC11C00000001147 OS=	132	19	6.82361e-27	58.16	no IPS match	no IPS match	no IPS match
[INTERPRO, BLASTED, MAPPED]	gene_ID_unitig23_95	U3N7Y6_SACKUMating factor alpha 1 OS=Saccharomyces kudriavzevii GN=MFalpha1 PE=4 SV=1	164	20	1.43642e-73	58.65	5	P:GO:0007618; C:GO:0005576; P:GO:0019953; F:GO:0000772; P:GO:0000750	P:mating; C:extracellular region; P:sexual reproduction; F:mating pheromone activity; P:pheromone-dependent signal transduction involved in conjugation with cellular fusion	Coil (COILS); IPR016326 (PIRSF); IPR008675 (PFAM); IPR016326 (PRODOM)	P:GO:0007618; C:GO:0005576; P:GO:0000750; F:GO:0000772	P:mating; C:extracellular region; P:pheromone-dependent signal transduction involved in conjugation with cellular fusion; F:mating pheromone activity
[INTERPRO, BLASTED, MAPPED]	gene_ID_unitig23_96	A0A1L0DL67_9ASCOCIC11C00000001221 OS=	261	20	3.18526e-120	62.15	5	C:GO:0005634; F:GO:0003899; P:GO:0006351; P:GO:0042797; C:GO:0005666	C:nucleus; F:DNA-directed 5'-3' RNA polymerase activity; P:transcription, DNA-templated; P:tRNA transcription from RNA polymerase III promoter; C:DNA-directed RNA polymerase III complex	IPR006886 (PFAM); mobidb-lite (MOBIDB_LITE); IPR006886 (PTHR12069:PANTHER); PTHR12069 (PANTHER)	C:GO:0005634; F:GO:0003899; P:GO:0006351	C:nucleus; F:DNA-directed 5'-3' RNA polymerase activity; P:transcription, DNA-templated
[INTERPRO, BLASTED, MAPPED, ANNOTATED]	gene_ID_unitig23_97	A0A1A0HIQ2_9ASCODEAD-domain-containing OS=Metschnikowia bicuspidata bicuspidata NRRL YB-4993 GN=METBIDRAFT_76688 PE=3 SV=1	773	20	0	71.5	6	P:GO:0000463; F:GO:0005524; F:GO:0003723; F:GO:0004386; C:GO:0005730; P:GO:0000027	P:maturation of LSU-rRNA from tricistronic rRNA transcript (SSU-rRNA, 5.8S rRNA, LSU-rRNA); F:ATP binding; F:RNA binding; F:helicase activity; C:nucleolus; P:ribosomal large subunit assembly	EC:3.6.1.15	Nucleoside-triphosphate phosphatase	Coil (COILS); IPR014001 (SMART); IPR025313 (SMART); IPR001650 (SMART); G3DSA:3.40.50.300 (GENE3D); G3DSA:3.40.50.300 (GENE3D); IPR001650 (PFAM); IPR025313 (PFAM); IPR011545 (PFAM); mobidb-lite (MOBIDB_LITE); mobidb-lite (MOBIDB_LITE); mobidb-lite (MOBIDB_LITE); PTHR24031 (PANTHER); PTHR24031:SF409 (PANTHER); IPR014014 (PROSITE_PROFILES); IPR001650 (PROSITE_PROFILES); IPR014001 (PROSITE_PROFILES);…	F:GO:0003676; F:GO:0005524
[INTERPRO, BLASTED, MAPPED, ANNOTATED]	gene_ID_unitig23_98	A0A1A0HIK3_9ASCOScavenger mRNA decapping enzyme OS=Metschnikowia bicuspidata bicuspidata NRRL YB-4993 GN=METBIDRAFT_34095 PE=4 SV=1	305	20	3.51011e-172	76.45	5	C:GO:0005634; F:GO:0000340; P:GO:0000290; C:GO:0005829; F:GO:0016787	C:nucleus; F:RNA 7-methylguanosine cap binding; P:deadenylation-dependent decapping of nuclear-transcribed mRNA; C:cytosol; F:hydrolase activity	PF11969 (PFAM); IPR008594 (PFAM); IPR008594 (PIRSF); G3DSA:3.30.2240.10 (GENE3D); IPR011146 (G3DSA:3.30.428.GENE3D); IPR008594 (PANTHER); IPR019808 (PROSITE_PATTERNS); IPR011146 (SUPERFAMILY); IPR011145 (SUPERFAMILY)	F:GO:0003824; P:GO:0000290; F:GO:0016787	F:catalytic activity; P:deadenylation-dependent decapping of nuclear-transcribed mRNA; F:hydrolase activity
[INTERPRO, BLASTED, MAPPED]	gene_ID_unitig23_99	A0A1L0DKL5_9ASCOCIC11C00000000750 OS=	970	20	0	52.15	2	C:GO:0005575; F:GO:0003674	C:cellular_component; F:molecular_function	Coil (COILS); Coil (COILS); IPR011989 (G3DSA:1.25.10.GENE3D); mobidb-lite (MOBIDB_LITE); mobidb-lite (MOBIDB_LITE); mobidb-lite (MOBIDB_LITE); mobidb-lite (MOBIDB_LITE); mobidb-lite (MOBIDB_LITE); mobidb-lite (MOBIDB_LITE); mobidb-lite (MOBIDB_LITE); mobidb-lite (MOBIDB_LITE)	no GO terms	no GO terms
[INTERPRO, BLASTED, MAPPED, ANNOTATED]	gene_ID_unitig23_100	A0A1A0HHS8_9ASCOExtradiol ring-cleavage class III subunit B OS=Metschnikowia bicuspidata bicuspidata NRRL YB-4993 GN=METBIDRAFT_35837 PE=4 SV=1	369	20	5.63582e-172	66.5	2	F:GO:0016491; F:GO:0046872	F:oxidoreductase activity; F:metal ion binding	PF02900 (PFAM); G3DSA:3.40.830.10 (GENE3D); PTHR30096 (PANTHER); PTHR30096:SF5 (PANTHER); IPR014436 (CDD); IPR004183 (SUPERFAMILY)	P:GO:0006725; F:GO:0016701; F:GO:0008270; F:GO:0008198; F:GO:0016491; P:GO:0055114	P:cellular aromatic compound metabolic process; F:oxidoreductase activity, acting on single donors with incorporation of molecular oxygen; F:zinc ion binding; F:ferrous iron binding; F:oxidoreductase activity; P:oxidation-reduction process
[INTERPRO, BLASTED, MAPPED, ANNOTATED]	gene_ID_unitig23_101	A0A1A0HIP7_9ASCONADH alpha subunit 2 OS=Metschnikowia bicuspidata bicuspidata NRRL YB-4993 GN=METBIDRAFT_30133 PE=4 SV=1	92	20	6.11903e-51	80.35	2	F:GO:0008137; P:GO:0055114	F:NADH dehydrogenase (ubiquinone) activity; P:oxidation-reduction process	EC:1.6.99.5; EC:1.6.99.3; EC:1.6.5.3	Acting on NADH or NADPH; NADH dehydrogenase; NADH:ubiquinone reductase (H(+)-translocating)	IPR007741 (SMART); IPR016464 (PIRSF); G3DSA:3.40.30.10 (GENE3D); IPR007741 (PFAM); IPR016464 (PANTHER); IPR012336 (SUPERFAMILY)	no GO terms
[INTERPRO, BLASTED, MAPPED, ANNOTATED]	gene_ID_unitig23_102	A0A1L0C2T8_9ASCOCIC11C00000001686 OS=	1200	20	0	80.25	2	C:GO:0005634; C:GO:0044732	C:nucleus; C:mitotic spindle pole body	Coil (COILS); IPR012978 (PFAM); IPR011989 (G3DSA:1.25.10.GENE3D); IPR011989 (G3DSA:1.25.10.GENE3D); mobidb-lite (MOBIDB_LITE); mobidb-lite (MOBIDB_LITE); PTHR21576 (PANTHER); PTHR21576:SF48 (PANTHER); IPR016024 (SUPERFAMILY)	F:GO:0005488	F:binding
[INTERPRO, BLASTED, MAPPED, ANNOTATED]	gene_ID_unitig23_103	A0A1A0HI85_9ASCORibosomal S16 OS=Metschnikowia bicuspidata bicuspidata NRRL YB-4993 GN=METBIDRAFT_30131 PE=3 SV=1	135	20	8.49258e-80	79.2	3	F:GO:0003735; C:GO:0005763; P:GO:0006412	F:structural constituent of ribosome; C:mitochondrial small ribosomal subunit; P:translation	IPR023803 (G3DSA:3.30.1320.GENE3D); IPR000307 (PFAM); IPR000307 (TIGRFAM); PTHR12919:SF25 (PANTHER); IPR000307 (PANTHER); IPR020592 (PROSITE_PATTERNS); IPR000307 (HAMAP); IPR023803 (SUPERFAMILY)	F:GO:0003735; C:GO:0005840; C:GO:0005622; P:GO:0006412	F:structural constituent of ribosome; C:ribosome; C:intracellular; P:translation
[INTERPRO, BLASTED]	gene_ID_unitig23_104	A0A1L0C3C5_9ASCOCIC11C00000004436 OS=	483	5	0	55.8	no IPS match	no IPS match	no IPS match
[INTERPRO, BLASTED, MAPPED, ANNOTATED]	gene_ID_unitig23_105	Q6BKG1_DEBHA60S acidic ribosomal P0 OS=Debaryomyces hansenii (strain ATCC 36239 CBS 767 JCM 1990 NBRC 0083 IGC 2968) GN=DEHA2F22242g PE=3 SV=1	310	20	4.81177e-170	90.65	5	F:GO:0003735; P:GO:0002181; C:GO:0022625; F:GO:0070180; P:GO:0000027	F:structural constituent of ribosome; P:cytoplasmic translation; C:cytosolic large ribosomal subunit; F:large ribosomal subunit rRNA binding; P:ribosomal large subunit assembly	PF00428 (PFAM); IPR001790 (PFAM); IPR030670 (PIRSF); mobidb-lite (MOBIDB_LITE); PTHR21141 (PANTHER); PTHR21141:SF66 (PANTHER); cd05795 (CDD); SSF160369 (SUPERFAMILY)	P:GO:0042254; C:GO:0005622	P:ribosome bio_	genesis; C:intracellular
[INTERPRO, BLASTED, MAPPED, ANNOTATED]	gene_ID_unitig23_106	A0A1A0HIJ6_9ASCOEndopolyphosphatase OS=Metschnikowia bicuspidata bicuspidata NRRL YB-4993 GN=METBIDRAFT_76695 PE=4 SV=1	635	20	0	69.8	3	F:GO:0016462; C:GO:0005774; P:GO:0006797	F:pyrophosphatase activity; C:vacuolar membrane; P:polyphosphate metabolic process	IPR012358 (PIRSF); IPR029052 (G3DSA:3.60.21.GENE3D); PTHR10340:SF43 (PANTHER); PTHR10340 (PANTHER); cd00842 (CDD); IPR029052 (SUPERFAMILY); TMhelix (TMHMM)	F:GO:0000298; C:GO:0016021; C:GO:0005773	F:endopolyphosphatase activity; C:integral component of membrane; C:vacuole
[INTERPRO, BLASTED, MAPPED, ANNOTATED]	gene_ID_unitig23_107	A0A1A0HI73_9ASCOHomeobox-domain-containing OS=Metschnikowia bicuspidata bicuspidata NRRL YB-4993 GN=METBIDRAFT_37473 PE=4 SV=1	407	20	2.54663e-139	66.15	3	C:GO:0005634; P:GO:0006355; F:GO:0043565	C:nucleus; P:regulation of transcription, DNA-templated; F:sequence-specific DNA binding	IPR001356 (SMART); IPR001356 (PFAM); G3DSA:1.10.10.60 (GENE3D); mobidb-lite (MOBIDB_LITE); mobidb-lite (MOBIDB_LITE); mobidb-lite (MOBIDB_LITE); PTHR24326 (PANTHER); PTHR24326:SF430 (PANTHER); IPR017970 (PROSITE_PATTERNS); IPR001356 (PROSITE_PROFILES); cd00086 (CDD); IPR009057 (SUPERFAMILY)	F:GO:0003677; P:GO:0006355; F:GO:0043565	F:DNA binding; P:regulation of transcription, DNA-templated; F:sequence-specific DNA binding
[INTERPRO, BLASTED, MAPPED, ANNOTATED]	gene_ID_unitig23_108	A0A1A0HIN7_9ASCOEukaryotic translation initiation factor 3 subunit I OS=Metschnikowia bicuspidata bicuspidata NRRL YB-4993 GN=TIF34 PE=3 SV=1	353	20	0	88.9	12	C:GO:0043614; F:GO:0003743; P:GO:0001731; P:GO:0071470; C:GO:0071541; C:GO:0016282; C:GO:0022627; C:GO:0071540; C:GO:0034399; C:GO:0033290; P:GO:0006446; P:GO:0002188	C:multi-eIF complex; F:translation initiation factor activity; P:formation of translation preinitiation complex; P:cellular response to osmotic stress; C:eukaryotic translation initiation factor 3 complex, eIF3m; C:eukaryotic 43S preinitiation complex; C:cytosolic small ribosomal subunit; C:eukaryotic translation initiation factor 3 complex, eIF3e; C:nuclear periphery; C:eukaryotic 48S preinitiat…	IPR001680 (SMART); IPR001680 (PFAM); IPR015943 (G3DSA:2.130.10.GENE3D); PTHR42968 (PANTHER); IPR019775 (PROSITE_PATTERNS); IPR001680 (PROSITE_PROFILES); IPR027525 (HAMAP); IPR001680 (PROSITE_PROFILES); IPR017986 (PROSITE_PROFILES); IPR017986 (SUPERFAMILY)	F:GO:0003743; F:GO:0005515; C:GO:0005737; C:GO:0005852	F:translation initiation factor activity; F:protein binding; C:cytoplasm; C:eukaryotic translation initiation factor 3 complex
[INTERPRO, BLASTED, MAPPED, ANNOTATED]	gene_ID_unitig23_109	A0A1A0HIJ1_9ASCOAlpha beta-hydrolase OS=Metschnikowia bicuspidata bicuspidata NRRL YB-4993 GN=METBIDRAFT_76677 PE=4 SV=1	269	20	0	87.15	2	C:GO:0005739; F:GO:0008806	C:mitochondrion; F:carboxymethylenebutenolidase activity	EC:3.1.1.45; EC:3.1.1.1	Carboxymethylenebutenolidase; Carboxylesterase	IPR029058 (G3DSA:3.40.50.GENE3D); IPR002925 (PFAM); PTHR17630 (PANTHER); PTHR17630:SF59 (PANTHER); IPR029058 (SUPERFAMILY)	F:GO:0016787
[INTERPRO, BLASTED]	gene_ID_unitig23_110	A0A1L0C0V1_9ASCOCIC11C00000005017 OS=	61	20	4.61183e-23	88.3	Coil (COILS); IPR007513 (PFAM); mobidb-lite (MOBIDB_LITE); PTHR13596:SF7 (PANTHER); PTHR13596 (PANTHER)	no GO terms	no GO terms
[INTERPRO, BLASTED, MAPPED, ANNOTATED]	gene_ID_unitig23_111	A0A1A0HHH9_9ASCOATPase GET3 OS=Metschnikowia bicuspidata bicuspidata NRRL YB-4993 GN=GET3 PE=3 SV=1	348	20	0	92.35	17	F:GO:0016887; C:GO:0043529; F:GO:0042802; P:GO:0006890; F:GO:0005085; F:GO:0051082; P:GO:0045048; P:GO:0006620; P:GO:0043547; P:GO:0000750; C:GO:0005634; F:GO:0005524; P:GO:0009408; F:GO:0046872; C:GO:0005829; P:GO:0010038; P:GO:1990507	F:ATPase activity; C:GET complex; F:identical protein binding; P:retrograde vesicle-mediated transport, Golgi to ER; F:guanyl-nucleotide exchange factor activity; F:unfolded protein binding; P:protein insertion into ER membrane; P:posttranslational protein targeting to membrane; P:positive regulation of GTPase activity; P:pheromone-dependent signal transduction involved in conjugation with cellul…	EC:3.6.1.3; EC:3.6.1.15	Adenosinetriphosphatase; Nucleoside-triphosphate phosphatase	IPR016300 (TIGRFAM); IPR025723 (PFAM); G3DSA:3.40.50.300 (GENE3D); IPR016300 (PANTHER); IPR027542 (PTHR10803:PANTHER); IPR027542 (HAMAP); cd02035 (CDD); IPR027417 (SUPERFAMILY)	F:GO:0016887; F:GO:0005524
[INTERPRO, BLASTED]	gene_ID_unitig23_112	A0A1L0C0J8_9ASCOCIC11C00000003512 OS=	278	5	3.25195e-42	49.8	no IPS match	no IPS match	no IPS match
[INTERPRO, BLASTED, MAPPED, ANNOTATED]	gene_ID_unitig23_113	A0A1L0C0L7_9ASCOCIC11C00000004970 OS=	460	20	0	71.7	2	F:GO:0008270; C:GO:0005829	F:zinc ion binding; C:cytosol	IPR001841 (SMART); IPR013083 (G3DSA:3.30.40.GENE3D); IPR001841 (PFAM); IPR004331 (PFAM); PTHR23327 (PANTHER); PTHR23327:SF33 (PANTHER); IPR017907 (PROSITE_PATTERNS); IPR004331 (PROSITE_PROFILES); IPR001841 (PROSITE_PROFILES); IPR001841 (CDD); SSF57850 (SUPERFAMILY)	no GO terms	no GO terms
[INTERPRO, BLASTED, MAPPED]	gene_ID_unitig23_114	A0A1A0HHZ3_9ASCONEDD8-activating enzyme E1 regulatory subunit OS=Metschnikowia bicuspidata bicuspidata NRRL YB-4993 GN=METBIDRAFT_34755 PE=3 SV=1	516	20	0	65.7	4	F:GO:0019781; P:GO:0006464; P:GO:0045116; F:GO:0008641	F:NEDD8 activating enzyme activity; P:cellular protein modification process; P:protein neddylation; F:small protein activating enzyme activity	Coil (COILS); G3DSA:3.40.50.720 (GENE3D); IPR030667 (PIRSF); IPR000594 (PFAM); PTHR10953 (PANTHER); IPR030667 (PTHR10953:PANTHER); IPR000594 (SUPERFAMILY)	F:GO:0019781; P:GO:0045116; F:GO:0008641	F:NEDD8 activating enzyme activity; P:protein neddylation; F:small protein activating enzyme activity
[INTERPRO, BLASTED, MAPPED, ANNOTATED]	gene_ID_unitig23_115	A0A1A0HH10_9ASCORNA helicase OS=Metschnikowia bicuspidata bicuspidata NRRL YB-4993 GN=METBIDRAFT_29924 PE=3 SV=1	607	20	0	78.8	9	F:GO:0005524; F:GO:0003723; P:GO:0000470; F:GO:0004386; C:GO:0005730; C:GO:0030686; P:GO:0000027; P:GO:1902626; C:GO:0005654	F:ATP binding; F:RNA binding; P:maturation of LSU-rRNA; F:helicase activity; C:nucleolus; C:90S preribosome; P:ribosomal large subunit assembly; P:assembly of large subunit precursor of preribosome; C:nucleoplasm	EC:3.6.1.15	Nucleoside-triphosphate phosphatase	Coil (COILS); IPR025313 (SMART); IPR014001 (SMART); IPR001650 (SMART); IPR001650 (PFAM); G3DSA:3.40.50.300 (GENE3D); IPR025313 (PFAM); G3DSA:3.40.50.300 (GENE3D); IPR011545 (PFAM); mobidb-lite (MOBIDB_LITE); PTHR24031:SF474 (PANTHER); PTHR24031 (PANTHER); IPR000629 (PROSITE_PATTERNS); IPR014001 (PROSITE_PROFILES); IPR001650 (PROSITE_PROFILES); IPR014014 (PROSITE_PROFILES); cd00079 (CDD); IPR02741…	F:GO:0003676; F:GO:0005524
[INTERPRO, BLASTED, MAPPED, ANNOTATED]	gene_ID_unitig23_116	A0A1A0HHI5_9ASC pseudouridine synthase OS=Metschnikowia bicuspidata bicuspidata NRRL YB-4993 GN=METBIDRAFT_76481 PE=3 SV=1	438	20	0	73.2	6	C:GO:0005634; F:GO:0003723; P:GO:0031119; C:GO:0005829; F:GO:0009982; P:GO:1990481	C:nucleus; F:RNA binding; P:tRNA pseudouridine synthesis; C:cytosol; F:pseudouridine synthase activity; P:mRNA pseudouridine synthesis	EC:5.4.99.12	tRNA pseudouridine(38-40) synthase	IPR020095 (G3DSA:3.30.70.GENE3D); IPR001406 (TIGRFAM); G3DSA:3.30.70.580 (GENE3D); IPR020097 (PFAM); mobidb-lite (MOBIDB_LITE); IPR001406 (PANTHER); PTHR11142:SF19 (PANTHER); IPR001406 (HAMAP); cd02569 (CDD); IPR020103 (SUPERFAMILY)	P:GO:0001522; F:GO:0003723; P:GO:0009451; F:GO:0009982
[INTERPRO, BLASTED, MAPPED, ANNOTATED]	gene_ID_unitig23_117	A0A1L0C0W5_9ASCOCIC11C00000005204 OS=	652	20	0	70.85	2	F:GO:0016791; P:GO:0016311	F:phosphatase activity; P:dephosphorylation	EC:3.1.3.41	4-nitrophenylphosphatase	IPR029021 (G3DSA:3.90.190.GENE3D); IPR026893 (PFAM); IPR029058 (G3DSA:3.40.50.GENE3D); PTHR31126:SF32 (PANTHER); PTHR31126 (PANTHER); IPR016130 (PROSITE_PATTERNS); IPR000387 (PROSITE_PROFILES); IPR029058 (SUPERFAMILY); IPR029021 (SUPERFAMILY)	F:GO:0004725; F:GO:0016791; P:GO:0016311
[INTERPRO, BLASTED, MAPPED, ANNOTATED]	gene_ID_unitig23_118	A0A1L0GLU2_9ASCOCIC11C00000004358 OS=	145	20	2.44511e-73	66.95	3	C:GO:0031390; P:GO:0007064; P:GO:0035753	C:Ctf18 RFC-like complex; P:mitotic sister chromatid cohesion; P:maintenance of DNA trinucleotide repeats	IPR018607 (PFAM); PTHR28605 (PANTHER); PTHR28605:SF3 (PANTHER)	C:GO:0031390; P:GO:0007064	C:Ctf18 RFC-like complex; P:mitotic sister chromatid cohesion
[INTERPRO, BLASTED, MAPPED, ANNOTATED]	gene_ID_unitig23_119	A0A1L0C0L6_9ASCOCIC11C00000002245 OS=	472	20	0	72.3	1	C:GO:0016020	C:membrane	IPR021460 (PFAM); mobidb-lite (MOBIDB_LITE); PTHR35184 (PANTHER); PTHR35184:SF2 (PANTHER); TMhelix (TMHMM); TMhelix (TMHMM); TMhelix (TMHMM); TMhelix (TMHMM); TMhelix (TMHMM); TMhelix (TMHMM); TMhelix (TMHMM)	no GO terms	no GO terms
[INTERPRO, BLASTED, MAPPED, ANNOTATED]	gene_ID_unitig23_120	A0A0L0P989_9ASCOEndo--beta-glucanase OS=	925	20	1.34268e-171	58.3	4	F:GO:0004338; P:GO:0000920; C:GO:0005576; C:GO:0009986	F:glucan exo-1,3-beta-glucosidase activity; P:cell separation after cytokinesis; C:extracellular region; C:cell surface	EC:3.2.1.21; EC:3.2.1.58	Beta-glucosidase; Glucan 1,3-beta-glucosidase	G3DSA:1.10.287.1170 (GENE3D); G3DSA:2.70.98.30 (GENE3D); IPR005200 (PFAM); mobidb-lite (MOBIDB_LITE); PTHR31983:SF11 (PANTHER); IPR005200 (PANTHER)	F:GO:0052861
[INTERPRO, BLASTED, MAPPED, ANNOTATED]	gene_ID_unitig23_121_partial	A0A1A0HET7_9ASCOGlycoside hydrolase OS=Metschnikowia bicuspidata bicuspidata NRRL YB-4993 GN=METBIDRAFT_77810 PE=4 SV=1	101	20	5.97288e-23	64.95	2	C:GO:0044464; F:GO:0004553	C:cell part; F:hydrolase activity, hydrolyzing O-glycosyl compounds	IPR005200 (PFAM); PTHR31983:SF11 (PANTHER); IPR005200 (PANTHER)	F:GO:0052861	F:glucan endo-1,3-beta-glucanase activity, C-3 substituted reducing group
[INTERPRO, BLASTED, MAPPED]	gene_ID_unitig24_1	A0A1L0B8Z9_9ASCOCIC11C00000003634 OS=	826	20	0	61.7	4	F:GO:0003700; F:GO:0008270; P:GO:0006355; F:GO:0043565	F:transcription factor activity, sequence-specific DNA binding; F:zinc ion binding; P:regulation of transcription, DNA-templated; F:sequence-specific DNA binding	IPR000679 (PRINTS); IPR000679 (SMART); IPR000679 (PFAM); IPR013860 (PFAM); IPR011893 (PFAM); IPR013088 (G3DSA:3.30.50.GENE3D); G3DSA:3.40.30.10 (GENE3D); mobidb-lite (MOBIDB_LITE); mobidb-lite (MOBIDB_LITE); mobidb-lite (MOBIDB_LITE); PTHR10071 (PANTHER); PTHR10071:SF271 (PANTHER); IPR000679 (PROSITE_PATTERNS); IPR000679 (PROSITE_PROFILES); cd00202 (CDD); SSF57716 (SUPERFAMILY); IPR012336 (SUPERF…	F:GO:0008270; F:GO:0003700; P:GO:0006355; F:GO:0043565	F:zinc ion binding; F:transcription factor activity, sequence-specific DNA binding; P:regulation of transcription, DNA-templated; F:sequence-specific DNA binding
[INTERPRO, BLASTED, MAPPED, ANNOTATED]	gene_ID_unitig24_2	A0A1A0H4T9_9ASCODNA topoisomerase 2 OS=Metschnikowia bicuspidata bicuspidata NRRL YB-4993 GN=METBIDRAFT_79938 PE=3 SV=1	1442	20	0	79.3	14	P:GO:0007131; P:GO:0006271; P:GO:0000019; P:GO:0006333; P:GO:0006265; P:GO:0044774; C:GO:0000795; P:GO:0006268; F:GO:0003677; F:GO:0005524; C:GO:0097047; P:GO:0097046; P:GO:0031055; F:GO:0003918	P:reciprocal meiotic recombination; P:DNA strand elongation involved in DNA replication; P:regulation of mitotic recombination; P:chromatin assembly or disassembly; P:DNA topological change; P:mitotic DNA integrity checkpoint; C:synaptonemal complex; P:DNA unwinding involved in DNA replication; F:DNA binding; F:ATP binding; C:DNA replication termination region; P:replication fork progression beyo…	EC:3.6.1.3; EC:5.99.1; EC:5.99.1.3; EC:3.6.1.15	Adenosinetriphosphatase; Other isomerases; DNA topoisomerase (ATP-hydrolyzing); Nucleoside-triphosphate phosphatase	Coil (COILS); Coil (COILS); IPR001154 (PRINTS); IPR001241 (PRINTS); IPR001241 (SMART); IPR003594 (SMART); IPR002205 (SMART); IPR002205 (PFAM); G3DSA:3.30.1490.30 (GENE3D); IPR013759 (G3DSA:3.40.50.GENE3D); IPR006171 (PFAM); IPR003594 (PFAM); IPR013506 (PFAM); IPR013758 (G3DSA:3.90.199.GENE3D); IPR003594 (G3DSA:3.30.565.GENE3D); IPR014721 (G3DSA:3.30.230.GENE3D); IPR031660 (PFAM); IPR024946 (G3DSA…	F:GO:0003677; F:GO:0005524; F:GO:0003918; P:GO:0006265; P:GO:0006259
[INTERPRO, NO-BLAST]	gene_ID_unitig24_3	---NA---	118	mobidb-lite (MOBIDB_LITE)	no GO terms	no GO terms
[INTERPRO, BLASTED, MAPPED, ANNOTATED]	gene_ID_unitig24_4	A0A1A0H4G2_9ASCO -domain-containing OS=Metschnikowia bicuspidata bicuspidata NRRL YB-4993 GN=METBIDRAFT_47599 PE=4 SV=1	269	20	2.40791e-154	74.45	1	F:GO:0005488	F:binding	Coil (COILS); Coil (COILS); IPR001623 (PRINTS); IPR001623 (SMART); IPR001623 (G3DSA:1.10.287.GENE3D); IPR001623 (PFAM); PTHR24074:SF14 (PANTHER); PTHR24074 (PANTHER); IPR018253 (PROSITE_PATTERNS); IPR001623 (PROSITE_PROFILES); IPR001623 (CDD); IPR001623 (SUPERFAMILY)	no GO terms	no GO terms
[INTERPRO, BLASTED, MAPPED, ANNOTATED]	gene_ID_unitig24_5	A0A1A0H4W1_9ASCOPLP-dependent transferase OS=Metschnikowia bicuspidata bicuspidata NRRL YB-4993 GN=METBIDRAFT_13727 PE=3 SV=1	413	20	0	89.75	4	P:GO:0019265; C:GO:0005739; C:GO:0016021; F:GO:0008453	P:glycine biosynthetic process, by transamination of glyoxylate; C:mitochondrion; C:integral component of membrane; F:alanine-glyoxylate transaminase activity	EC:2.6.1.44	Alanine--glyoxylate transaminase	IPR015422 (G3DSA:3.90.1150.GENE3D); IPR024169 (PIRSF); IPR015421 (G3DSA:3.40.640.GENE3D); IPR000192 (PFAM); PTHR21152 (PANTHER); PTHR21152:SF26 (PANTHER); IPR020578 (PROSITE_PATTERNS); IPR015424 (SUPERFAMILY)	F:GO:0003824
[INTERPRO, BLASTED, MAPPED]	gene_ID_unitig24_6	A0A1A0H4X6_9ASCOWD40 repeat OS=Metschnikowia bicuspidata bicuspidata NRRL YB-4993 GN=METBIDRAFT_33594 PE=4 SV=1	408	20	6.08559e-180	52.3	3	C:GO:0005634; C:GO:0070209; F:GO:0003674	C:nucleus; C:ASTRA complex; F:molecular_function	IPR001680 (SMART); IPR015943 (G3DSA:2.130.10.GENE3D); IPR015943 (G3DSA:2.130.10.GENE3D); PTHR19854:SF17 (PANTHER); PTHR19854 (PANTHER); IPR019775 (PROSITE_PATTERNS); IPR017986 (PROSITE_PROFILES); IPR001680 (PROSITE_PROFILES); IPR017986 (SUPERFAMILY)	F:GO:0005515	F:protein binding
[INTERPRO, BLASTED, MAPPED, ANNOTATED]	gene_ID_unitig24_7	A0A1A0H4J4_9ASCOSWI5-dependent HO expression 3 (Fragment) OS=Metschnikowia bicuspidata bicuspidata NRRL YB-4993 GN=SHE3 PE=3 SV=1	433	20	9.99404e-157	67.15	9	P:GO:0001897; P:GO:0008298; C:GO:0016020; P:GO:0036180; F:GO:0003729; P:GO:0036170; C:GO:0005783; P:GO:0009267; P:GO:0006810	P:cytolysis by symbiont of host cells; P:intracellular mRNA localization; C:membrane; P:filamentous growth of a population of unicellular organisms in response to biotic stimulus; F:mRNA binding; P:filamentous growth of a population of unicellular organisms in response to starvation; C:endoplasmic reticulum; P:cellular response to starvation; P:transport	Coil (COILS); Coil (COILS); Coil (COILS); G3DSA:1.20.5.10 (GENE3D); G3DSA:1.20.5.340 (GENE3D); IPR031398 (PFAM); mobidb-lite (MOBIDB_LITE); SSF57997 (SUPERFAMILY)	P:GO:0048309; P:GO:0051028	P:endoplasmic reticulum inheritance; P:mRNA transport
[INTERPRO, BLASTED, MAPPED, ANNOTATED]	gene_ID_unitig24_8	A0A1L0BXY2_9ASCOCIC11C00000001275 OS=	1472	20	0	77.25	4	F:GO:0005524; F:GO:0042626; P:GO:0055085; C:GO:0016021	F:ATP binding; F:ATPase activity, coupled to transmembrane movement of substances; P:transmembrane transport; C:integral component of membrane	EC:3.6.1.3; EC:3.6.1.15	Adenosinetriphosphatase; Nucleoside-triphosphate phosphatase	Coil (COILS); IPR003593 (SMART); G3DSA:3.40.50.300 (GENE3D); IPR029481 (PFAM); IPR003439 (PFAM); IPR013525 (PFAM); IPR010929 (PFAM); mobidb-lite (MOBIDB_LITE); PTHR19241 (PANTHER); PTHR19241:SF364 (PANTHER); IPR017871 (PROSITE_PATTERNS); IPR003439 (PROSITE_PROFILES); IPR003439 (PROSITE_PROFILES); IPR034001 (CDD); IPR034003 (CDD); IPR027417 (SUPERFAMILY); IPR027417 (SUPERFAMILY); TMhelix (TMHMM); …	F:GO:0016887; F:GO:0005524; F:GO:0042626; C:GO:0016020; C:GO:0016021; P:GO:0006810
[INTERPRO, BLASTED]	gene_ID_unitig24_9	A0A1L0BG41_9ASCOCIC11C00000005579 OS=	654	20	2.00112e-89	52.55	Coil (COILS); Coil (COILS); IPR019194 (PFAM); mobidb-lite (MOBIDB_LITE); mobidb-lite (MOBIDB_LITE); mobidb-lite (MOBIDB_LITE)	no GO terms	no GO terms
[INTERPRO, BLASTED, MAPPED, ANNOTATED]	gene_ID_unitig24_10	A0A1A0H4X1_9ASCOSNase-domain-containing OS=Metschnikowia bicuspidata bicuspidata NRRL YB-4993 GN=METBIDRAFT_47363 PE=4 SV=1	228	20	3.49913e-141	82.3	5	P:GO:0090305; F:GO:0046872; F:GO:0004519; C:GO:0005739; C:GO:0016021	P:nucleic acid phosphodiester bond hydrolysis; F:metal ion binding; F:endonuclease activity; C:mitochondrion; C:integral component of membrane	IPR016071 (SMART); G3DSA:2.40.50.90 (GENE3D); IPR016071 (PFAM); mobidb-lite (MOBIDB_LITE); PTHR12302:SF6 (PANTHER); PTHR12302 (PANTHER); IPR016071 (PROSITE_PROFILES); IPR016071 (SUPERFAMILY); TMhelix (TMHMM)	no GO terms	no GO terms
[INTERPRO, BLASTED, MAPPED, ANNOTATED]	gene_ID_unitig24_11	A0A1A0H4I9_9ASCOPhosphoacetylglucosamine mutase OS=Metschnikowia bicuspidata bicuspidata NRRL YB-4993 GN=METBIDRAFT_47515 PE=4 SV=1	532	20	0	82	4	F:GO:0000287; P:GO:0034221; P:GO:0006045; F:GO:0004610	F:magnesium ion binding; P:fungal-type cell wall chitin biosynthetic process; P:N-acetylglucosamine biosynthetic process; F:phosphoacetylglucosamine mutase activity	EC:5.4.2.3	Phosphoacetylglucosamine mutase	IPR005843 (PFAM); G3DSA:3.40.120.10 (GENE3D); G3DSA:3.40.120.10 (GENE3D); IPR005843 (G3DSA:3.30.310.GENE3D); IPR016657 (PIRSF); G3DSA:3.40.120.10 (GENE3D); G3DSA:3.40.120.10 (GENE3D); IPR005844 (PFAM); PTHR22573:SF66 (PANTHER); PTHR22573 (PANTHER); IPR016066 (PROSITE_PATTERNS); IPR016657 (CDD); IPR016055 (SUPERFAMILY); IPR016055 (SUPERFAMILY); IPR005843 (SUPERFAMILY); IPR016055 (SUPERFAMILY); IPR…	F:GO:0000287; P:GO:0005975; F:GO:0016868; P:GO:0071704; F:GO:0004610
[INTERPRO, BLASTED, MAPPED, ANNOTATED]	gene_ID_unitig24_12	A0A1L0D6J4_9ASCOCIC11C00000001701 OS=	149	20	1.60483e-59	76.4	1	C:GO:0016021	C:integral component of membrane	mobidb-lite (MOBIDB_LITE); TMhelix (TMHMM)	no GO terms	no GO terms
[INTERPRO, BLASTED]	gene_ID_unitig24_13	A0A1L0D9Z5_9ASCOCIC11C00000003567 OS=	383	3	2.37534e-119	67	Coil (COILS); mobidb-lite (MOBIDB_LITE)	no GO terms	no GO terms
[INTERPRO, BLASTED, MAPPED, ANNOTATED]	gene_ID_unitig24_14	A0A1A0H4S3_9ASC adenine N(6)-methyltransferase OS=Metschnikowia bicuspidata bicuspidata NRRL YB-4993 GN=METBIDRAFT_33589 PE=3 SV=1	322	20	0	91.8	8	C:GO:0005634; P:GO:0000462; F:GO:0003723; C:GO:0072686; F:GO:0052909; P:GO:0031167; C:GO:0030686; F:GO:0000179	C:nucleus; P:maturation of SSU-rRNA from tricistronic rRNA transcript (SSU-rRNA, 5.8S rRNA, LSU-rRNA); F:RNA binding; C:mitotic spindle; F:18S rRNA (adenine(1779)-N(6)/adenine(1780)-N(6))-dimethyltransferase activity; P:rRNA methylation; C:90S preribosome; F:rRNA (adenine-N6,N6-)-dimethyltransferase activity	EC:2.1.1.183	18S rRNA (adenine(1779)-N(6)/adenine(1780)-N(6))-dimethyltransferase	IPR020598 (SMART); IPR011530 (TIGRFAM); G3DSA:3.40.50.150 (GENE3D); IPR001737 (PFAM); mobidb-lite (MOBIDB_LITE); IPR001737 (PANTHER); PTHR11727:SF19 (PANTHER); IPR020596 (PROSITE_PATTERNS); IPR001737 (PROSITE_PROFILES); cd02440 (CDD); IPR029063 (SUPERFAMILY)	P:GO:0000154; F:GO:0008649; P:GO:0006364; F:GO:0000179
[INTERPRO, BLASTED, MAPPED, ANNOTATED]	gene_ID_unitig24_15	A0A1A0H4E8_9ASCOGalactose oxidase OS=Metschnikowia bicuspidata bicuspidata NRRL YB-4993 GN=METBIDRAFT_33588 PE=4 SV=1	630	20	0	85.35	2	C:GO:0005737; C:GO:0016021	C:cytoplasm; C:integral component of membrane	Coil (COILS); Coil (COILS); PF13415 (PFAM); IPR015915 (G3DSA:2.120.10.GENE3D); IPR025183 (PFAM); mobidb-lite (MOBIDB_LITE); mobidb-lite (MOBIDB_LITE); mobidb-lite (MOBIDB_LITE); PTHR23244 (PANTHER); PTHR23244:SF375 (PANTHER); SSF117281 (SUPERFAMILY)	F:GO:0005515	F:protein binding
[INTERPRO, BLASTED, MAPPED, ANNOTATED]	gene_ID_unitig24_16	A0A1A0H4U6_9ASCOWD40 repeat OS=Metschnikowia bicuspidata bicuspidata NRRL YB-4993 GN=METBIDRAFT_33587 PE=4 SV=1	509	20	0	87.1	3	C:GO:0005829; P:GO:0042254; C:GO:0005730	C:cytosol; P:ribosome bio_	genesis; C:nucleolus	IPR001680 (SMART); IPR001680 (PFAM); IPR022052 (PFAM); IPR015943 (G3DSA:2.130.10.GENE3D); mobidb-lite (MOBIDB_LITE); mobidb-lite (MOBIDB_LITE); PTHR22850 (PANTHER); PTHR22850:SF165 (PANTHER); IPR019775 (PROSITE_PATTERNS); IPR001680 (PROSITE_PROFILES); IPR001680 (PROSITE_PROFILES); IPR017986 (PROSITE_PROFILES); IPR001680 (PROSITE_PROFILES); IPR017986 (SUPERFAMILY)	F:GO:0005515	F:protein binding
[INTERPRO, BLASTED, MAPPED]	gene_ID_unitig24_17	A0A1A0H4W2_9ASCOTPR (Fragment) OS=Metschnikowia bicuspidata bicuspidata NRRL YB-4993 GN=METBIDRAFT_33586 PE=4 SV=1	874	20	0	62.1	4	C:GO:0005634; C:GO:0046540; P:GO:0006396; P:GO:0000398	C:nucleus; C:U4/U6 x U5 tri-snRNP complex; P:RNA processing; P:mRNA splicing, via spliceosome	IPR003107 (SMART); IPR019734 (SMART); IPR011990 (G3DSA:1.25.40.GENE3D); IPR011990 (G3DSA:1.25.40.GENE3D); IPR010491 (PFAM); IPR011990 (G3DSA:1.25.40.GENE3D); IPR011990 (G3DSA:1.25.40.GENE3D); mobidb-lite (MOBIDB_LITE); mobidb-lite (MOBIDB_LITE); IPR027108 (PTHR11246:PANTHER); PTHR11246 (PANTHER); IPR011990 (SUPERFAMILY); IPR011990 (SUPERFAMILY)	C:GO:0005634; F:GO:0005515; P:GO:0006396; P:GO:0000398	C:nucleus; F:protein binding; P:RNA processing; P:mRNA splicing, via spliceosome
[INTERPRO, BLASTED, MAPPED, ANNOTATED]	gene_ID_unitig24_18	A0A1L0BAK7_9ASCOCIC11C00000005002 OS=	676	20	0	64.6	5	C:GO:0005634; P:GO:0030071; P:GO:0007093; C:GO:0043234; C:GO:0044446	C:nucleus; P:regulation of mitotic metaphase/anaphase transition; P:mitotic cell cycle checkpoint; C:protein complex; C:intracellular organelle part	Coil (COILS); Coil (COILS); Coil (COILS); Coil (COILS); Coil (COILS); Coil (COILS); Coil (COILS); Coil (COILS); Coil (COILS); G3DSA:1.20.5.400 (GENE3D); G3DSA:1.20.5.340 (GENE3D); IPR008672 (PFAM); G3DSA:1.20.1170.10 (GENE3D); mobidb-lite (MOBIDB_LITE); mobidb-lite (MOBIDB_LITE); IPR008672 (PANTHER); PTHR23168:SF1 (PANTHER)	P:GO:0007094	P:mitotic spindle assembly checkpoint
[INTERPRO, BLASTED, MAPPED, ANNOTATED]	gene_ID_unitig24_19	A0A1A0H4R8_9ASCOUBC OS=Metschnikowia bicuspidata bicuspidata NRRL YB-4993 GN=METBIDRAFT_84741 PE=3 SV=1	137	20	2.18057e-94	89.95	6	C:GO:0005634; C:GO:0005737; P:GO:0000209; C:GO:0031371; P:GO:0006301; P:GO:0010994	C:nucleus; C:cytoplasm; P:protein polyubiquitination; C:ubiquitin conjugating enzyme complex; P:postreplication repair; P:free ubiquitin chain polymerization	SM00212 (SMART); IPR000608 (PFAM); IPR016135 (G3DSA:3.10.110.GENE3D); PTHR24067:SF200 (PANTHER); PTHR24067 (PANTHER); IPR000608 (PROSITE_PROFILES); IPR016135 (SUPERFAMILY)	no GO terms	no GO terms
[INTERPRO, BLASTED, MAPPED]	gene_ID_unitig24_20	A0A1L0BG03_9ASCOCIC11C00000000256 OS=	137	20	4.27528e-66	66.85	2	C:GO:0042720; F:GO:0003674	C:mitochondrial inner membrane peptidase complex; F:molecular_function	IPR024645 (PFAM); mobidb-lite (MOBIDB_LITE); PD027755 (PRODOM)	C:GO:0042720	C:mitochondrial inner membrane peptidase complex
[INTERPRO, BLASTED, MAPPED, ANNOTATED]	gene_ID_unitig25_1	A0A1A0H4Q7_9ASCOFlavocytochrome c OS=Metschnikowia bicuspidata bicuspidata NRRL YB-4993 GN=METBIDRAFT_47522 PE=4 SV=1	650	20	0	80.1	4	F:GO:0046872; P:GO:0055114; F:GO:0000104; F:GO:0020037	F:metal ion binding; P:oxidation-reduction process; F:succinate dehydrogenase activity; F:heme binding	EC:1.3.99.1	Deleted entry	IPR001199 (PRINTS); IPR001199 (SMART); IPR003953 (PFAM); IPR001199 (PFAM); IPR023753 (G3DSA:3.50.50.GENE3D); IPR001199 (G3DSA:3.10.120.GENE3D); IPR010960 (TIGRFAM); mobidb-lite (MOBIDB_LITE); PTHR43400:SF4 (PANTHER); PTHR43400 (PANTHER); IPR018506 (PROSITE_PATTERNS); IPR001199 (PROSITE_PROFILES); IPR027477 (SUPERFAMILY); IPR023753 (SUPERFAMILY); IPR001199 (SUPERFAMILY)	F:GO:0016491; P:GO:0055114; F:GO:0000104; F:GO:0020037
[INTERPRO, BLASTED, MAPPED]	gene_ID_unitig25_2	A0A1A0H5P6_9ASCO aldo-keto reductase OS=Metschnikowia bicuspidata bicuspidata NRRL YB-4993 GN=METBIDRAFT_13698 PE=4 SV=1	285	20	7.42813e-163	69.55	2	F:GO:0016491; P:GO:0055114	F:oxidoreductase activity; P:oxidation-reduction process	IPR020471 (PRINTS); IPR020471 (PIRSF); IPR023210 (G3DSA:3.20.20.GENE3D); IPR023210 (PFAM); IPR020471 (PANTHER); PTHR11732:SF291 (PANTHER); IPR018170 (PROSITE_PATTERNS); IPR018170 (PROSITE_PATTERNS); IPR023210 (CDD); IPR023210 (SUPERFAMILY)	F:GO:0016491; P:GO:0055114	F:oxidoreductase activity; P:oxidation-reduction process
[INTERPRO, BLASTED, MAPPED, ANNOTATED]	gene_ID_unitig26_1	G3B5R2_CANTCSynaptobrevin OS=Candida tenuis (strain ATCC 10573 BCRC 21748 CBS 615 JCM 9827 NBRC 10315 NRRL Y-1498 VKM Y-70) GN=CANTEDRAFT_98432 PE=4 SV=1	111	20	7.20008e-76	96.1	7	C:GO:0030659; C:GO:0032153; C:GO:0051285; C:GO:0016021; C:GO:0005783; C:GO:0005794; P:GO:0006897	C:cytoplasmic vesicle membrane; C:cell division site; C:cell cortex of cell tip; C:integral component of membrane; C:endoplasmic reticulum; C:Golgi apparatus; P:endocytosis	IPR001388 (PRINTS); G3DSA:1.20.5.110 (GENE3D); IPR016444 (PIRSF); IPR001388 (PFAM); mobidb-lite (MOBIDB_LITE); PTHR21136:SF152 (PANTHER); PTHR21136 (PANTHER); IPR001388 (PROSITE_PATTERNS); IPR001388 (PROSITE_PROFILES); cd15874 (CDD); SSF58038 (SUPERFAMILY); TMhelix (TMHMM)	P:GO:0016192; C:GO:0016021	P:vesicle-mediated transport; C:integral component of membrane
[INTERPRO, BLASTED, MAPPED, ANNOTATED]	gene_ID_unitig26_2	A0A1A0H4D8_9ASCOGlycine cleavage system H OS=Metschnikowia bicuspidata bicuspidata NRRL YB-4993 GN=METBIDRAFT_47535 PE=3 SV=1	170	20	3.30565e-108	76.1	6	C:GO:0005739; P:GO:0019464; P:GO:0055114; C:GO:0005960; P:GO:0006730; P:GO:0009249	C:mitochondrion; P:glycine decarboxylation via glycine cleavage system; P:oxidation-reduction process; C:glycine cleavage complex; P:one-carbon metabolic process; P:protein lipoylation	IPR033753 (PFAM); G3DSA:2.40.50.100 (GENE3D); IPR017453 (TIGRFAM); IPR002930 (PANTHER); PTHR11715:SF21 (PANTHER); IPR002930 (HAMAP); IPR000089 (PROSITE_PROFILES); cd06848 (CDD); IPR011053 (SUPERFAMILY)	P:GO:0019464; C:GO:0005960	P:glycine decarboxylation via glycine cleavage system; C:glycine cleavage complex
[INTERPRO, BLASTED, MAPPED, ANNOTATED]	gene_ID_unitig26_3	A0A1A0H4R3_9ASCOHeat shock Hsp70 family OS=Metschnikowia bicuspidata bicuspidata NRRL YB-4993 GN=METBIDRAFT_79921 PE=3 SV=1	647	20	0	93.2	1	F:GO:0005524	F:ATP binding	Coil (COILS); IPR013126 (PRINTS); IPR029048 (G3DSA:1.20.1270.GENE3D); G3DSA:3.30.420.40 (GENE3D); G3DSA:3.30.420.40 (GENE3D); IPR013126 (PFAM); IPR029047 (G3DSA:2.60.34.GENE3D); mobidb-lite (MOBIDB_LITE); PTHR19375 (PANTHER); PTHR19375:SF274 (PANTHER); IPR018181 (PROSITE_PATTERNS); IPR018181 (PROSITE_PATTERNS); IPR018181 (PROSITE_PATTERNS); cd10233 (CDD); SSF53067 (SUPERFAMILY); IPR029047 (SUPERF…	no GO terms	no GO terms
[INTERPRO, BLASTED, MAPPED]	gene_ID_unitig26_4	A0A1L0D6K6_9ASCOCIC11C00000000622 OS=	671	20	0	55.1	5	P:GO:0031505; P:GO:0055085; C:GO:0016020; C:GO:0016021; F:GO:0003674	P:fungal-type cell wall organization; P:transmembrane transport; C:membrane; C:integral component of membrane; F:molecular_function	IPR004837 (PFAM); PTHR12266 (PANTHER); PTHR12266:SF15 (PANTHER); TMhelix (TMHMM); TMhelix (TMHMM); TMhelix (TMHMM); TMhelix (TMHMM); TMhelix (TMHMM); TMhelix (TMHMM); TMhelix (TMHMM); TMhelix (TMHMM); TMhelix (TMHMM); TMhelix (TMHMM); TMhelix (TMHMM)	P:GO:0055085; C:GO:0016021	P:transmembrane transport; C:integral component of membrane
[INTERPRO, BLASTED, MAPPED, ANNOTATED]	gene_ID_unitig26_5	A0A1L0D9X3_9ASCOCIC11C00000003106 OS=	240	20	1.36919e-158	84.15	5	P:GO:0044182; C:GO:0005739; C:GO:0016021; P:GO:0009405; P:GO:0015976	P:filamentous growth of a population of unicellular organisms; C:mitochondrion; C:integral component of membrane; P:patho_	genesis; P:carbon utilization	mobidb-lite (MOBIDB_LITE); TMhelix (TMHMM)	no GO terms	no GO terms
[INTERPRO, BLASTED, MAPPED, ANNOTATED]	gene_ID_unitig26_6	A0A1A0H4R8_9ASCOUBC OS=Metschnikowia bicuspidata bicuspidata NRRL YB-4993 GN=METBIDRAFT_84741 PE=3 SV=1	137	20	2.18057e-94	89.95	6	C:GO:0005634; C:GO:0005737; P:GO:0000209; C:GO:0031371; P:GO:0006301; P:GO:0010994	C:nucleus; C:cytoplasm; P:protein polyubiquitination; C:ubiquitin conjugating enzyme complex; P:postreplication repair; P:free ubiquitin chain polymerization	SM00212 (SMART); IPR000608 (PFAM); IPR016135 (G3DSA:3.10.110.GENE3D); PTHR24067:SF200 (PANTHER); PTHR24067 (PANTHER); IPR000608 (PROSITE_PROFILES); IPR016135 (SUPERFAMILY)	no GO terms	no GO terms
[INTERPRO, BLASTED, MAPPED, ANNOTATED]	gene_ID_unitig26_7	A0A1L0CYE6_9ASCOCIC11C00000004230 OS=	699	20	0	77.1	5	P:GO:0044011; C:GO:0016021; P:GO:0036180; P:GO:0036170; P:GO:0009267	P:single-species biofilm formation on inanimate substrate; C:integral component of membrane; P:filamentous growth of a population of unicellular organisms in response to biotic stimulus; P:filamentous growth of a population of unicellular organisms in response to starvation; P:cellular response to starvation	IPR024645 (PFAM); IPR004299 (PFAM); PTHR13285 (PANTHER); PTHR13285:SF25 (PANTHER); PD027755 (PRODOM); TMhelix (TMHMM); TMhelix (TMHMM); TMhelix (TMHMM); TMhelix (TMHMM); TMhelix (TMHMM); TMhelix (TMHMM); TMhelix (TMHMM)	C:GO:0042720	C:mitochondrial inner membrane peptidase complex
[INTERPRO, BLASTED, MAPPED, ANNOTATED]	gene_ID_unitig26_8	A0A1L0BAK7_9ASCOCIC11C00000005002 OS=	676	20	0	64.5	5	C:GO:0005634; P:GO:0030071; P:GO:0007093; C:GO:0043234; C:GO:0044446	C:nucleus; P:regulation of mitotic metaphase/anaphase transition; P:mitotic cell cycle checkpoint; C:protein complex; C:intracellular organelle part	Coil (COILS); Coil (COILS); Coil (COILS); Coil (COILS); Coil (COILS); Coil (COILS); Coil (COILS); Coil (COILS); Coil (COILS); G3DSA:1.20.5.400 (GENE3D); G3DSA:1.20.5.50 (GENE3D); G3DSA:1.20.120.330 (GENE3D); G3DSA:1.10.287.510 (GENE3D); IPR008672 (PFAM); mobidb-lite (MOBIDB_LITE); mobidb-lite (MOBIDB_LITE); IPR008672 (PANTHER); PTHR23168:SF1 (PANTHER)	P:GO:0007094	P:mitotic spindle assembly checkpoint
[INTERPRO, BLASTED, MAPPED]	gene_ID_unitig26_9	A0A1A0H4W2_9ASCOTPR (Fragment) OS=Metschnikowia bicuspidata bicuspidata NRRL YB-4993 GN=METBIDRAFT_33586 PE=4 SV=1	522	20	0	57.9	5	C:GO:0005634; C:GO:0046540; P:GO:0006396; F:GO:0003674; P:GO:0000398	C:nucleus; C:U4/U6 x U5 tri-snRNP complex; P:RNA processing; F:molecular_function; P:mRNA splicing, via spliceosome	IPR003107 (SMART); IPR011990 (G3DSA:1.25.40.GENE3D); IPR011990 (G3DSA:1.25.40.GENE3D); IPR011990 (G3DSA:1.25.40.GENE3D); IPR011990 (G3DSA:1.25.40.GENE3D); PTHR11246 (PANTHER); IPR027108 (PTHR11246:PANTHER); IPR011990 (SUPERFAMILY); IPR011990 (SUPERFAMILY)	F:GO:0005515; P:GO:0006396; P:GO:0000398	F:protein binding; P:RNA processing; P:mRNA splicing, via spliceosome
[INTERPRO, BLASTED, MAPPED, ANNOTATED]	gene_ID_unitig26_10_partial	A0A1A0H4W2_9ASCOTPR (Fragment) OS=Metschnikowia bicuspidata bicuspidata NRRL YB-4993 GN=METBIDRAFT_33586 PE=4 SV=1	147	20	3.75903e-60	62.85	2	C:GO:0005634; P:GO:0006396	C:nucleus; P:RNA processing	IPR011990 (G3DSA:1.25.40.GENE3D); mobidb-lite (MOBIDB_LITE); IPR027108 (PTHR11246:PANTHER); PTHR11246 (PANTHER)	F:GO:0005515; P:GO:0000398	F:protein binding; P:mRNA splicing, via spliceosome
[INTERPRO, BLASTED, MAPPED, ANNOTATED]	gene_ID_unitig30_1	A0A1A0HCR3_9ASCOMFS _	general substrate transporter OS=Metschnikowia bicuspidata bicuspidata NRRL YB-4993 GN=METBIDRAFT_39040 PE=4 SV=1	552	20	0	76.7	2	P:GO:0055085; C:GO:0016021	P:transmembrane transport; C:integral component of membrane	G3DSA:1.20.1250.20 (GENE3D); G3DSA:1.20.1250.20 (GENE3D); IPR011701 (PFAM); mobidb-lite (MOBIDB_LITE); PTHR43791 (PANTHER); PTHR43791:SF21 (PANTHER); IPR020846 (CDD); IPR020846 (SUPERFAMILY); TMhelix (TMHMM); TMhelix (TMHMM); TMhelix (TMHMM); TMhelix (TMHMM); TMhelix (TMHMM); TMhelix (TMHMM); TMhelix (TMHMM); TMhelix (TMHMM)	P:GO:0055085; C:GO:0016021	P:transmembrane transport; C:integral component of membrane
[INTERPRO, BLASTED, MAPPED, ANNOTATED]	gene_ID_unitig30_2	A0A1L0BZ09_9ASCOCIC11C00000004425 OS=	275	20	7.82238e-119	64.1	4	P:GO:0050794; C:GO:0044424; P:GO:0044699; P:GO:0009987	P:regulation of cellular process; C:intracellular part; P:single-organism process; P:cellular process	IPR003719 (PIRSF); IPR003719 (PFAM); IPR003719 (TIGRFAM); G3DSA:3.10.310.10 (GENE3D); G3DSA:3.10.310.10 (GENE3D); IPR003719 (PANTHER); PTHR13774:SF27 (PANTHER); SSF54506 (SUPERFAMILY)	F:GO:0003824; P:GO:0009058	F:catalytic activity; P:biosynthetic process
[INTERPRO, BLASTED, MAPPED]	gene_ID_unitig30_3	A0A1B7YWX3_COLHI family decarboxylase OS=Colletotrichum higginsianum (strain IMI 349063) GN=CH63R_01725 PE=4 SV=1	2680	20	1.61459e-113	45.85	2	P:GO:0007155; P:GO:0000128	P:cell adhesion; P:flocculation	IPR018871 (PFAM); G3DSA:2.60.120.380 (GENE3D); SSF56988 (SUPERFAMILY)	no GO terms	no GO terms
[INTERPRO, BLASTED, MAPPED, ANNOTATED]	gene_ID_unitig30_4	A0A1A0H8G5_9ASCOPer-1domain-containing OS=Metschnikowia bicuspidata bicuspidata NRRL YB-4993 GN=METBIDRAFT_45020 PE=4 SV=1	345	20	0	71.95	1	C:GO:0016021	C:integral component of membrane	IPR007217 (PFAM); IPR007217 (PANTHER); PTHR13148:SF4 (PANTHER); TMhelix (TMHMM); TMhelix (TMHMM); TMhelix (TMHMM); TMhelix (TMHMM); TMhelix (TMHMM); TMhelix (TMHMM); TMhelix (TMHMM)	no GO terms	no GO terms
[INTERPRO, BLASTED, MAPPED, ANNOTATED]	gene_ID_unitig30_5	A0A1A0H829_9ASCOWinged helix DNA-binding domain-containing OS=Metschnikowia bicuspidata bicuspidata NRRL YB-4993 GN=METBIDRAFT_44754 PE=4 SV=1	235	20	1.4641e-136	74.5	8	P:GO:0036178; P:GO:0071285; P:GO:0045324; P:GO:0071469; C:GO:0044444; C:GO:0044446; P:GO:0006623; C:GO:0043227	P:filamentous growth of a population of unicellular organisms in response to neutral pH; P:cellular response to lithium ion; P:late endosome to vacuole transport; P:cellular response to alkaline pH; C:cytoplasmic part; C:intracellular organelle part; P:protein targeting to vacuole; C:membrane-bounded organelle	IPR011991 (G3DSA:1.10.10.GENE3D); IPR011991 (G3DSA:1.10.10.GENE3D); IPR007286 (PFAM); PTHR12806:SF1 (PANTHER); IPR007286 (PANTHER); IPR011991 (SUPERFAMILY); IPR011991 (SUPERFAMILY)	no GO terms	no GO terms
[INTERPRO, BLASTED, MAPPED, ANNOTATED]	gene_ID_unitig30_6	A0A1A0H865_9ASCO OS=Metschnikowia bicuspidata bicuspidata NRRL YB-4993 GN=METBIDRAFT_79456 PE=4 SV=1	363	20	0	63	1	C:GO:0044424	C:intracellular part	IPR020843 (SMART); G3DSA:3.40.50.720 (GENE3D); G3DSA:3.90.180.10 (GENE3D); PF13602 (PFAM); PTHR11695 (PANTHER); PTHR11695:SF633 (PANTHER); IPR016040 (SUPERFAMILY); IPR011032 (SUPERFAMILY)	F:GO:0016491	F:oxidoreductase activity
[INTERPRO, BLASTED, MAPPED, ANNOTATED]	gene_ID_unitig30_7	A0A1A0H7V1_9ASCODiphthine synthase OS=Metschnikowia bicuspidata bicuspidata NRRL YB-4993 GN=METBIDRAFT_45163 PE=3 SV=1	300	20	0	92.5	5	C:GO:0005634; P:GO:0017183; F:GO:0004164; C:GO:0005829; P:GO:0032259	C:nucleus; P:peptidyl-diphthamide biosynthetic process from peptidyl-histidine; F:diphthine synthase activity; C:cytosol; P:methylation	EC:2.1.1.98	Diphthine synthase	IPR014776 (G3DSA:3.30.950.GENE3D); IPR004551 (PIRSF); IPR000878 (PFAM); IPR004551 (TIGRFAM); IPR014777 (G3DSA:3.40.1010.GENE3D); PTHR10882 (PANTHER); IPR004551 (PTHR10882:PANTHER); IPR004551 (HAMAP); IPR004551 (CDD); IPR000878 (SUPERFAMILY)	P:GO:0017183; P:GO:0008152; F:GO:0004164; F:GO:0008168
[INTERPRO, BLASTED]	gene_ID_unitig30_8	A0A1L0DBP3_9ASCOCIC11C00000004537 OS=	214	9	1.42007e-16	51	mobidb-lite (MOBIDB_LITE); mobidb-lite (MOBIDB_LITE)	no GO terms	no GO terms
[INTERPRO, BLASTED, MAPPED, ANNOTATED]	gene_ID_unitig30_9	A0A1A0H8G1_9ASCOTerpenoid synthase OS=Metschnikowia bicuspidata bicuspidata NRRL YB-4993 GN=METBIDRAFT_79454 PE=3 SV=1	369	20	4.35529e-150	64.2	2	P:GO:0033386; F:GO:0004311	P:geranylgeranyl diphosphate biosynthetic process; F:farnesyltranstransferase activity	EC:2.5.1.29	Geranylgeranyl diphosphate synthase	IPR000092 (PFAM); IPR008949 (G3DSA:1.10.600.GENE3D); PTHR12001 (PANTHER); PTHR12001:SF65 (PANTHER); IPR033749 (PROSITE_PATTERNS); IPR033749 (PROSITE_PATTERNS); cd00685 (CDD); IPR008949 (SUPERFAMILY)	P:GO:0008299
[INTERPRO, BLASTED, MAPPED]	gene_ID_unitig30_10	A0A1A0H825_9ASCODerlin OS=Metschnikowia bicuspidata bicuspidata NRRL YB-4993 GN=METBIDRAFT_33106 PE=3 SV=1	182	5	9.18639e-49	53.2	4	C:GO:0005789; C:GO:0016020; C:GO:0016021; C:GO:0005783	C:endoplasmic reticulum membrane; C:membrane; C:integral component of membrane; C:endoplasmic reticulum	mobidb-lite (MOBIDB_LITE)	no GO terms	no GO terms
[INTERPRO, BLASTED]	gene_ID_unitig30_11	A0A1L0BBH3_9ASCOCIC11C00000000671 OS=	781	20	0	58.55	IPR003123 (PFAM); mobidb-lite (MOBIDB_LITE); mobidb-lite (MOBIDB_LITE); mobidb-lite (MOBIDB_LITE); IPR003123 (PROSITE_PROFILES); SSF109993 (SUPERFAMILY)	no GO terms	no GO terms
[INTERPRO, BLASTED, MAPPED]	gene_ID_unitig30_12	A0A1L0DBN6_9ASCOCIC11C00000001169 OS=	271	20	1.36827e-74	52.95	3	P:GO:0008150; C:GO:0005575; F:GO:0003674	P:biological_process; C:cellular_component; F:molecular_function	no IPS match	no IPS match	no IPS match
[INTERPRO, BLASTED, MAPPED, ANNOTATED]	gene_ID_unitig30_13	A0A1A0H8F3_9ASCOTranscription elongation factor Spt6 OS=Metschnikowia bicuspidata bicuspidata NRRL YB-4993 GN=METBIDRAFT_33103 PE=4 SV=1	1434	20	0	80.85	43	P:GO:0070827; P:GO:1900050; P:GO:1900111; P:GO:0036170; P:GO:0000414; P:GO:1900114; P:GO:1900436; P:GO:0000433; P:GO:0006348; P:GO:0060303; P:GO:0006368; P:GO:0001178; P:GO:0032968; C:GO:0000781; P:GO:0006338; P:GO:0044382; P:GO:0030702; F:GO:0003746; P:GO:0000183; F:GO:0001073; C:GO:0031618; P:GO:0031454; P:GO:0034401; P:GO:0071931; P:GO:0030466; P:GO:0051569; P:GO:0016973; P:GO:0042789; P:GO:00…	P:chromatin maintenance; P:negative regulation of histone exchange; P:positive regulation of histone H3-K9 dimethylation; P:filamentous growth of a population of unicellular organisms in response to starvation; P:regulation of histone H3-K36 methylation; P:positive regulation of histone H3-K9 trimethylation; P:positive regulation of filamentous growth of a population of unicellular organisms in r…	Coil (COILS); Coil (COILS); IPR000980 (SMART); IPR028083 (PFAM); IPR023323 (G3DSA:1.10.3500.GENE3D); IPR027999 (PFAM); IPR032706 (PFAM); PF14633 (PFAM); IPR028088 (PFAM); IPR006641 (G3DSA:3.30.420.GENE3D); IPR000980 (G3DSA:3.30.505.GENE3D); IPR023319 (G3DSA:1.10.10.GENE3D); G3DSA:2.40.50.140 (GENE3D); G3DSA:1.10.150.310 (GENE3D); IPR017072 (PIRSF); IPR028231 (PFAM); mobidb-lite (MOBIDB_LITE); PTH…	F:GO:0000991; F:GO:0003676; F:GO:0003677; P:GO:0032784; P:GO:0006139; P:GO:0006357	F:transcription factor activity, core RNA polymerase II binding; F:nucleic acid binding; F:DNA binding; P:regulation of DNA-templated transcription, elongation; P:nucleobase-containing compound metabolic process; P:regulation of transcription from RNA polymerase II promoter
[INTERPRO, BLASTED, MAPPED, ANNOTATED]	gene_ID_unitig30_14	A0A1A0H816_9ASCOClavaminate synthase OS=Metschnikowia bicuspidata bicuspidata NRRL YB-4993 GN=METBIDRAFT_33102 PE=4 SV=1	449	20	0	68.4	1	F:GO:0016491	F:oxidoreductase activity	IPR003819 (PFAM); G3DSA:3.60.130.10 (GENE3D); PTHR10696 (PANTHER); PTHR10696:SF34 (PANTHER); cd00250 (CDD); SSF51197 (SUPERFAMILY)	F:GO:0016491; P:GO:0055114	F:oxidoreductase activity; P:oxidation-reduction process
[INTERPRO, BLASTED, MAPPED, ANNOTATED]	gene_ID_unitig30_15	A0A1A0H851_9ASCODUF1212-domain-containing OS=Metschnikowia bicuspidata bicuspidata NRRL YB-4993 GN=METBIDRAFT_33101 PE=4 SV=1	932	20	0	69.65	1	C:GO:0016020	C:membrane	IPR010619 (PFAM); IPR024528 (PFAM); mobidb-lite (MOBIDB_LITE); mobidb-lite (MOBIDB_LITE); mobidb-lite (MOBIDB_LITE); mobidb-lite (MOBIDB_LITE); mobidb-lite (MOBIDB_LITE); PTHR31082 (PANTHER); IPR020846 (CDD); TMhelix (TMHMM); TMhelix (TMHMM); TMhelix (TMHMM); TMhelix (TMHMM); TMhelix (TMHMM); TMhelix (TMHMM); TMhelix (TMHMM); TMhelix (TMHMM); TMhelix (TMHMM)	no GO terms	no GO terms
[INTERPRO, BLASTED, MAPPED, ANNOTATED]	gene_ID_unitig30_16	A0A1A0H8E7_9ASCOInitiation factor 2 OS=Metschnikowia bicuspidata bicuspidata NRRL YB-4993 GN=METBIDRAFT_33099 PE=3 SV=1	1204	20	0	77.45	7	F:GO:0005525; F:GO:0003743; F:GO:0003924; C:GO:0005739; P:GO:0032543; F:GO:0000049; P:GO:0006413	F:GTP binding; F:translation initiation factor activity; F:GTPase activity; C:mitochondrion; P:mitochondrial translation; F:tRNA binding; P:translational initiation	EC:3.6.1.15	Nucleoside-triphosphate phosphatase	Coil (COILS); Coil (COILS); G3DSA:2.40.30.10 (GENE3D); G3DSA:3.40.50.300 (GENE3D); IPR023115 (PFAM); G3DSA:3.40.50.300 (GENE3D); IPR006847 (PFAM); PF00009 (PFAM); IPR007320 (PFAM); IPR023115 (G3DSA:3.40.50.GENE3D); IPR005225 (TIGRFAM); G3DSA:2.40.30.10 (GENE3D); IPR000178 (TIGRFAM); mobidb-lite (MOBIDB_LITE); mobidb-lite (MOBIDB_LITE); mobidb-lite (MOBIDB_LITE); mobidb-lite (MOBIDB_LITE); PTHR433…	F:GO:0005525; F:GO:0003743; C:GO:0005737; F:GO:0003924; P:GO:0006413; C:GO:0005622
[INTERPRO, BLASTED, MAPPED, ANNOTATED]	gene_ID_unitig30_17	A0A1L0BFD3_9ASCOCIC11C00000001889 OS=	543	20	0	67.2	6	F:GO:0003676; C:GO:0043229; P:GO:0051783; P:GO:0045860; P:GO:0006261; P:GO:0010564	F:nucleic acid binding; C:intracellular organelle; P:regulation of nuclear division; P:positive regulation of protein kinase activity; P:DNA-dependent DNA replication; P:regulation of cell cycle process	IPR006572 (SMART); IPR013939 (PFAM); IPR006572 (PFAM); mobidb-lite (MOBIDB_LITE); mobidb-lite (MOBIDB_LITE); PTHR15375:SF28 (PANTHER); PTHR15375 (PANTHER); IPR006572 (PROSITE_PROFILES)	F:GO:0003676; F:GO:0008270	F:nucleic acid binding; F:zinc ion binding
[INTERPRO, BLASTED, MAPPED]	gene_ID_unitig30_18	A0A1L0BEF6_9ASCOCIC11C00000002074 OS=	150	12	2.12657e-65	54.58	3	P:GO:0007165; C:GO:0034448; P:GO:0016237	P:signal transduction; C:EGO complex; P:lysosomal microautophagy	IPR020233 (PFAM)	P:GO:0007165; C:GO:0034448; P:GO:0016237	P:signal transduction; C:EGO complex; P:lysosomal microautophagy
[INTERPRO, BLASTED, MAPPED, ANNOTATED]	gene_ID_unitig30_19	G8YU36_PICSOPiso0_000478 OS=Pichia sorbitophila (strain ATCC MYA-4447 BCRC 22081 CBS 7064 NBRC 10061 NRRL Y-12695) GN=Piso0_000478 PE=3 SV=1	237	20	2.10269e-142	84.5	12	C:GO:0005634; F:GO:0004842; F:GO:0005524; F:GO:0042803; P:GO:0000086; C:GO:0005737; P:GO:0000209; P:GO:0031146; C:GO:0019005; F:GO:0016874; P:GO:0042787; P:GO:0051865	C:nucleus; F:ubiquitin-protein transferase activity; F:ATP binding; F:protein homodimerization activity; P:G2/M transition of mitotic cell cycle; C:cytoplasm; P:protein polyubiquitination; P:SCF-dependent proteasomal ubiquitin-dependent protein catabolic process; C:SCF ubiquitin ligase complex; F:ligase activity; P:protein ubiquitination involved in ubiquitin-dependent protein catabolic process; …	SM00212 (SMART); IPR016135 (G3DSA:3.10.110.GENE3D); IPR000608 (PFAM); mobidb-lite (MOBIDB_LITE); PTHR24067 (PANTHER); PTHR24067:SF166 (PANTHER); IPR023313 (PROSITE_PATTERNS); IPR000608 (PROSITE_PROFILES); IPR000608 (CDD); IPR016135 (SUPERFAMILY)	no GO terms	no GO terms
[INTERPRO, BLASTED, MAPPED, ANNOTATED]	gene_ID_unitig30_20	A0A1L0FZ84_9ASCOCIC11C00000002834 OS=	887	20	0	66	5	C:GO:0005623; F:GO:0015035; F:GO:0009055; P:GO:0045454; P:GO:0055114	C:cell; F:protein disulfide oxidoreductase activity; F:electron carrier activity; P:cell redox homeostasis; P:oxidation-reduction process	IPR006993 (PFAM); G3DSA:3.40.30.10 (GENE3D); mobidb-lite (MOBIDB_LITE); mobidb-lite (MOBIDB_LITE); mobidb-lite (MOBIDB_LITE); mobidb-lite (MOBIDB_LITE); PTHR12232 (PANTHER); PTHR12232:SF13 (PANTHER); IPR002109 (PROSITE_PROFILES); IPR012336 (SUPERFAMILY)	F:GO:0015035; F:GO:0009055; P:GO:0045454	F:protein disulfide oxidoreductase activity; F:electron carrier activity; P:cell redox homeostasis
[INTERPRO, BLASTED, MAPPED, ANNOTATED]	gene_ID_unitig30_21	A0A1L0FSL2_9ASCOCIC11C00000004015 OS=	1204	20	0	71.45	9	F:GO:0003723; P:GO:0051641; C:GO:0042175; P:GO:0007059; P:GO:0022414; P:GO:0042221; C:GO:0005783; P:GO:0006342; C:GO:0044446	F:RNA binding; P:cellular localization; C:nuclear outer membrane-endoplasmic reticulum membrane network; P:chromosome segregation; P:reproductive process; P:response to chemical; C:endoplasmic reticulum; P:chromatin silencing; C:intracellular organelle part	Coil (COILS); Coil (COILS); IPR004087 (SMART); IPR004088 (PFAM); IPR004088 (G3DSA:3.30.1370.GENE3D); IPR004088 (G3DSA:3.30.1370.GENE3D); IPR004088 (G3DSA:3.30.1370.GENE3D); IPR004088 (G3DSA:3.30.1370.GENE3D); IPR004088 (G3DSA:3.30.1370.GENE3D); IPR004088 (G3DSA:3.30.1370.GENE3D); mobidb-lite (MOBIDB_LITE); mobidb-lite (MOBIDB_LITE); mobidb-lite (MOBIDB_LITE); PTHR10627:SF47 (PANTHER); PTHR10627 (…	F:GO:0003676; F:GO:0003723	F:nucleic acid binding; F:RNA binding
[INTERPRO, BLASTED, MAPPED, ANNOTATED]	gene_ID_unitig30_22	A0A1A0H842_9ASCOAmino acid transporter OS=Metschnikowia bicuspidata bicuspidata NRRL YB-4993 GN=METBIDRAFT_213516 PE=4 SV=1	528	20	0	85.75	5	P:GO:0044690; P:GO:1902475; C:GO:0016021; P:GO:0042883; F:GO:0000102	P:methionine import; P:L-alpha-amino acid transmembrane transport; C:integral component of membrane; P:cysteine transport; F:L-methionine secondary active transmembrane transporter activity	IPR007741 (SMART); IPR002293 (PFAM); G3DSA:3.40.30.10 (GENE3D); PTHR11785 (PANTHER); PTHR11785:SF431 (PANTHER); IPR012336 (SUPERFAMILY); TMhelix (TMHMM); TMhelix (TMHMM); TMhelix (TMHMM); TMhelix (TMHMM); TMhelix (TMHMM); TMhelix (TMHMM); TMhelix (TMHMM)	C:GO:0016020; F:GO:0015171; P:GO:0003333	C:membrane; F:amino acid transmembrane transporter activity; P:amino acid transmembrane transport
[INTERPRO, BLASTED, MAPPED, ANNOTATED]	gene_ID_unitig30_23	A0A1L0FZ79_9ASCOCIC11C00000005633 OS=	178	20	6.40651e-70	53.1	1	P:GO:0050789	P:regulation of biological process	IPR001138 (SMART); IPR001138 (G3DSA:4.10.240.GENE3D); IPR001138 (PFAM); mobidb-lite (MOBIDB_LITE); mobidb-lite (MOBIDB_LITE); IPR001138 (PROSITE_PATTERNS); IPR001138 (PROSITE_PROFILES); IPR001138 (CDD); IPR001138 (SUPERFAMILY)	C:GO:0005634; F:GO:0008270; P:GO:0006355; F:GO:0000981	C:nucleus; F:zinc ion binding; P:regulation of transcription, DNA-templated; F:RNA polymerase II transcription factor activity, sequence-specific DNA binding
[INTERPRO, BLASTED, MAPPED, ANNOTATED]	gene_ID_unitig30_24	A0A1A0H8D8_9ASCO -domain-containing OS=Metschnikowia bicuspidata bicuspidata NRRL YB-4993 GN=METBIDRAFT_84204 PE=4 SV=1	747	20	0	86	4	F:GO:0000908; F:GO:0000907; P:GO:0044273; P:GO:0055114	F:taurine dioxygenase activity; F:sulfonate dioxygenase activity; P:sulfur compound catabolic process; P:oxidation-reduction process	EC:1.14.11; EC:1.14.11.17	Acting on paired donors, with incorporation or reduction of molecular oxygen. The oxygen incorporated need not be derived from O(2); Taurine dioxygenase	IPR003819 (PFAM); G3DSA:3.60.130.10 (GENE3D); mobidb-lite (MOBIDB_LITE); PTHR30468:SF19 (PANTHER); PTHR30468 (PANTHER); SSF51197 (SUPERFAMILY); SSF51197 (SUPERFAMILY)	F:GO:0016491; P:GO:0055114
[INTERPRO, BLASTED, MAPPED, ANNOTATED]	gene_ID_unitig30_25	B5RT65_DEBHADEHA2C03014p OS=Debaryomyces hansenii (strain ATCC 36239 CBS 767 JCM 1990 NBRC 0083 IGC 2968) GN=DEHA2C03014g PE=4 SV=1	1402	20	0	61.85	1	C:GO:0030427	C:site of polarized growth	Coil (COILS); Coil (COILS); Coil (COILS); Coil (COILS); IPR002048 (SMART); IPR000261 (SMART); IPR015940 (SMART); G3DSA:1.10.238.10 (GENE3D); G3DSA:1.20.5.50 (GENE3D); G3DSA:1.20.5.170 (GENE3D); G3DSA:1.10.8.10 (GENE3D); G3DSA:1.20.120.330 (GENE3D); IPR000261 (PFAM); G3DSA:1.10.238.10 (GENE3D); mobidb-lite (MOBIDB_LITE); mobidb-lite (MOBIDB_LITE); mobidb-lite (MOBIDB_LITE); mobidb-lite (MOBIDB_LIT…	F:GO:0005515; F:GO:0005509	F:protein binding; F:calcium ion binding
[INTERPRO, BLASTED, MAPPED, ANNOTATED]	gene_ID_unitig30_26	A0A0L0P0Y6_9ASCOH ACA ribonucleo complex subunit OS=	200	20	2.27123e-80	92.8	5	C:GO:0031429; P:GO:0031120; C:GO:0019013; P:GO:0006364; F:GO:0034513	C:box H/ACA snoRNP complex; P:snRNA pseudouridine synthesis; C:viral nucleocapsid; P:rRNA processing; F:box H/ACA snoRNA binding	G3DSA:2.40.10.230 (GENE3D); IPR007504 (PFAM); mobidb-lite (MOBIDB_LITE); mobidb-lite (MOBIDB_LITE); IPR021154 (PANTHER); PTHR23237:SF9 (PANTHER); IPR021154 (PRODOM); IPR009000 (SUPERFAMILY)	C:GO:0031429; P:GO:0001522; P:GO:0042254	C:box H/ACA snoRNP complex; P:pseudouridine synthesis; P:ribosome bio_	genesis
[INTERPRO, BLASTED, MAPPED]	gene_ID_unitig30_27	A0A1A0H8D1_9ASCO GTP-binding engB OS=Metschnikowia bicuspidata bicuspidata NRRL YB-4993 GN=METBIDRAFT_79434 PE=4 SV=1	390	20	0	65.55	1	F:GO:0005525	F:GTP binding	G3DSA:3.40.50.300 (GENE3D); G3DSA:3.40.50.300 (GENE3D); IPR006073 (PFAM); mobidb-lite (MOBIDB_LITE); mobidb-lite (MOBIDB_LITE); PTHR11649 (PANTHER); PTHR11649:SF78 (PANTHER); IPR030393 (PROSITE_PROFILES); cd01876 (CDD); IPR027417 (SUPERFAMILY)	F:GO:0005525	F:GTP binding
[INTERPRO, BLASTED, MAPPED]	gene_ID_unitig30_28	A0A1L0B7L9_9ASCOCIC11C00000004903 OS=	144	20	6.77753e-54	60	3	C:GO:0016020; C:GO:0016021; C:GO:0005794	C:membrane; C:integral component of membrane; C:Golgi apparatus	IPR006976 (PFAM); PTHR28008:SF3 (PANTHER); PTHR28008 (PANTHER); TMhelix (TMHMM); TMhelix (TMHMM); TMhelix (TMHMM)	no GO terms	no GO terms
[INTERPRO, BLASTED, MAPPED]	gene_ID_unitig30_29	A0A1A0H7Z6_9ASCODopa 4,5-dioxygenase OS=Metschnikowia bicuspidata bicuspidata NRRL YB-4993 GN=METBIDRAFT_13156 PE=4 SV=1	124	20	3.85091e-66	71.2	6	F:GO:0051213; P:GO:0008150; F:GO:0016491; P:GO:0055114; C:GO:0005575; F:GO:0003674	F:dioxygenase activity; P:biological_process; F:oxidoreductase activity; P:oxidation-reduction process; C:cellular_component; F:molecular_function	IPR014980 (PFAM); IPR023389 (G3DSA:3.30.70.GENE3D); PTHR36423:SF3 (PANTHER); PTHR36423 (PANTHER); IPR023389 (SUPERFAMILY)	no GO terms	no GO terms
[INTERPRO, BLASTED, MAPPED, ANNOTATED]	gene_ID_unitig30_30	A0A1A0H832_9ASCOPhospholipase D OS=Metschnikowia bicuspidata bicuspidata NRRL YB-4993 GN=METBIDRAFT_73296 PE=4 SV=1	1761	20	0	69.4	12	C:GO:0043229; P:GO:0003006; P:GO:0032879; P:GO:0032989; P:GO:0050794; P:GO:0051716; F:GO:0008081; P:GO:0006644; P:GO:0019953; P:GO:0044702; C:GO:0043227; F:GO:0004620	C:intracellular organelle; P:developmental process involved in reproduction; P:regulation of localization; P:cellular component morpho_	genesis; P:regulation of cellular process; P:cellular response to stimulus; F:phosphoric diester hydrolase activity; P:phospholipid metabolic process; P:sexual reproduction; P:single organism reproductive process; C:membrane-bounded organelle; F:phospholipase activity	IPR001736 (SMART); G3DSA:3.30.870.10 (GENE3D); G3DSA:3.30.870.10 (GENE3D); PIRSF009376 (PIRSF); G3DSA:3.30.870.10 (GENE3D); IPR025202 (PFAM); IPR001683 (G3DSA:3.30.1520.GENE3D); IPR001736 (PFAM); mobidb-lite (MOBIDB_LITE); mobidb-lite (MOBIDB_LITE); mobidb-lite (MOBIDB_LITE); mobidb-lite (MOBIDB_LITE); PTHR18896:SF92 (PANTHER); IPR015679 (PANTHER); IPR001736 (PROSITE_PROFILES); IPR001736 (PROSITE…	F:GO:0003824; F:GO:0035091	F:catalytic activity; F:phosphatidylinositol binding
[INTERPRO, BLASTED, MAPPED, ANNOTATED]	gene_ID_unitig30_31	A0A1A0H7R9_9ASCODUF396-domain-containing OS=Metschnikowia bicuspidata bicuspidata NRRL YB-4993 GN=METBIDRAFT_45505 PE=4 SV=1	217	20	4.12518e-125	83.7	9	P:GO:0031505; P:GO:0045053; C:GO:0031965; P:GO:0006888; C:GO:0030173; C:GO:0030176; P:GO:0006486; C:GO:0030134; F:GO:0097020	P:fungal-type cell wall organization; P:protein retention in Golgi apparatus; C:nuclear membrane; P:ER to Golgi vesicle-mediated transport; C:integral component of Golgi membrane; C:integral component of endoplasmic reticulum membrane; P:protein glycosylation; C:ER to Golgi transport vesicle; F:COPII adaptor activity	IPR007277 (PFAM); IPR007277 (PANTHER); PTHR13144:SF2 (PANTHER); TMhelix (TMHMM); TMhelix (TMHMM); TMhelix (TMHMM); TMhelix (TMHMM)	no GO terms	no GO terms
[INTERPRO, BLASTED, MAPPED, ANNOTATED]	gene_ID_unitig30_32	A0A1A0H8C7_9ASCOHomoserine acetyltransferase OS=Metschnikowia bicuspidata bicuspidata NRRL YB-4993 GN=METBIDRAFT_79430 PE=4 SV=1	502	20	0	81.9	3	F:GO:0004414; P:GO:0009086; C:GO:0005737	F:homoserine O-acetyltransferase activity; P:methionine biosynthetic process; C:cytoplasm	EC:2.3.1.31	Homoserine O-acetyltransferase	IPR008220 (PIRSF); IPR000073 (PFAM); IPR008220 (TIGRFAM); IPR029058 (G3DSA:3.40.50.GENE3D); mobidb-lite (MOBIDB_LITE); mobidb-lite (MOBIDB_LITE); PTHR42886 (PANTHER); PTHR42886:SF8 (PANTHER); IPR029058 (SUPERFAMILY)	F:GO:0016747; C:GO:0005737; P:GO:0009058
[INTERPRO, BLASTED]	gene_ID_unitig30_33	A0A1A0H738_9ASCOUncharacterized protein OS=Metschnikowia bicuspidata var. bicuspidata NRRL YB-4993 GN=METBIDRAFT_83818 PE=4 SV=1	310	6	1.28107e-19	45.17	mobidb-lite (MOBIDB_LITE)	no GO terms	no GO terms
[INTERPRO, BLASTED]	gene_ID_unitig30_34	A0A1A0H738_9ASCOUncharacterized protein OS=Metschnikowia bicuspidata var. bicuspidata NRRL YB-4993 GN=METBIDRAFT_83818 PE=4 SV=1	310	6	1.18186e-19	45.17	mobidb-lite (MOBIDB_LITE)	no GO terms	no GO terms
[INTERPRO, BLASTED, MAPPED, ANNOTATED]	gene_ID_unitig30_35	A0A1L0FSM8_9ASCOCIC11C00000000343 OS=	234	20	8.09615e-52	49.65	1	C:GO:0016020	C:membrane	IPR019388 (PFAM); PTHR23129:SF6 (PANTHER); IPR019388 (PANTHER); TMhelix (TMHMM); TMhelix (TMHMM); TMhelix (TMHMM)	C:GO:0005789; P:GO:0019915	C:endoplasmic reticulum membrane; P:lipid storage
[INTERPRO, BLASTED, MAPPED, ANNOTATED]	gene_ID_unitig30_36	A0A1A0H7Z1_9ASCOHeavy metal translocatin OS=Metschnikowia bicuspidata bicuspidata NRRL YB-4993 GN=METBIDRAFT_79429 PE=3 SV=1	1236	20	0	74.5	5	F:GO:0019829; C:GO:0016020; P:GO:0098655; P:GO:0030001; F:GO:0005488	F:cation-transporting ATPase activity; C:membrane; P:cation transmembrane transport; P:metal ion transport; F:binding	EC:3.6.1.3; EC:3.6.1.15	Adenosinetriphosphatase; Nucleoside-triphosphate phosphatase	PR00119 (PRINTS); IPR027256 (TIGRFAM); IPR006121 (PFAM); PF00122 (PFAM); G3DSA:1.20.1110.10 (GENE3D); G3DSA:3.30.70.100 (GENE3D); PF00702 (PFAM); G3DSA:3.30.70.100 (GENE3D); IPR001757 (TIGRFAM); G3DSA:3.30.70.100 (GENE3D); IPR023299 (G3DSA:3.40.1110.GENE3D); mobidb-lite (MOBIDB_LITE); PTHR43520 (PANTHER); PTHR43520:SF7 (PANTHER); IPR017969 (PROSITE_PATTERNS); PS01229 (PROSITE_PATTERNS); IPR018303…	F:GO:0000166; P:GO:0006812; F:GO:0019829; F:GO:0046872; C:GO:0016021; P:GO:0030001
[INTERPRO, BLASTED, MAPPED, ANNOTATED]	gene_ID_unitig30_37	A0A1A0H827_9ASCO phosphatase 2C OS=Metschnikowia bicuspidata bicuspidata NRRL YB-4993 GN=METBIDRAFT_44643 PE=3 SV=1	335	20	0	76.65	9	F:GO:0004722; P:GO:0000001; C:GO:0005634; P:GO:0000173; C:GO:0005737; F:GO:0046872; P:GO:0006470; P:GO:0006388; P:GO:0000750	F:protein serine/threonine phosphatase activity; P:mitochondrion inheritance; C:nucleus; P:inactivation of MAPK activity involved in osmosensory signaling pathway; C:cytoplasm; F:metal ion binding; P:protein dephosphorylation; P:tRNA splicing, via endonucleolytic cleavage and ligation; P:pheromone-dependent signal transduction involved in conjugation with cellular fusion	EC:3.1.3.16; EC:3.1.3.41	Protein-serine/threonine phosphatase; 4-nitrophenylphosphatase	IPR001932 (SMART); IPR001932 (G3DSA:3.60.40.GENE3D); IPR001932 (PFAM); mobidb-lite (MOBIDB_LITE); PTHR13832:SF479 (PANTHER); IPR015655 (PANTHER); IPR000222 (PROSITE_PATTERNS); IPR001932 (PROSITE_PROFILES); cd00143 (CDD); IPR001932 (SUPERFAMILY)	F:GO:0004722; F:GO:0003824; P:GO:0006470; F:GO:0043169
[INTERPRO, BLASTED, MAPPED, ANNOTATED]	gene_ID_unitig30_38	H8X5D3_CANO9Pet100 chaperone OS=Candida orthopsilosis (strain 90-125) GN=CORT_0D03870 PE=4 SV=1	98	20	1.47364e-57	87.8	4	P:GO:0033617; C:GO:0031305; F:GO:0051082; P:GO:0009060	P:mitochondrial respiratory chain complex IV assembly; C:integral component of mitochondrial inner membrane; F:unfolded protein binding; P:aerobic respiration	IPR018625 (PFAM); IPR018625 (PANTHER); TMhelix (TMHMM)	P:GO:0033617; C:GO:0005739	P:mitochondrial respiratory chain complex IV assembly; C:mitochondrion
[INTERPRO, BLASTED, MAPPED]	gene_ID_unitig30_39	A0A1L0B833_9ASCOCIC11C00000002374 OS=	501	15	3.08856e-125	49.2	3	P:GO:0030447; C:GO:0005575; F:GO:0003674	P:filamentous growth; C:cellular_component; F:molecular_function	IPR032675 (G3DSA:3.80.10.GENE3D); IPR001810 (PFAM); IPR001810 (PROSITE_PROFILES); IPR001810 (SUPERFAMILY)	F:GO:0005515	F:protein binding
[INTERPRO, BLASTED, MAPPED, ANNOTATED]	gene_ID_unitig30_40	A0A1A0H8C2_9ASCODDE-domain-containing (Fragment) OS=Metschnikowia bicuspidata bicuspidata NRRL YB-4993 GN=METBIDRAFT_18009 PE=4 SV=1	1110	20	0	72.5	4	F:GO:0003677; P:GO:0045935; P:GO:0060255; P:GO:0031328	F:DNA binding; P:positive regulation of nucleobase-containing compound metabolic process; P:regulation of macromolecule metabolic process; P:positive regulation of cellular biosynthetic process	IPR006600 (SMART); G3DSA:1.10.10.60 (GENE3D); IPR029058 (G3DSA:3.40.50.GENE3D); IPR022742 (PFAM); G3DSA:1.10.10.60 (GENE3D); IPR006600 (PFAM); IPR004875 (PFAM); mobidb-lite (MOBIDB_LITE); mobidb-lite (MOBIDB_LITE); PTHR11614 (PANTHER); IPR006600 (PROSITE_PROFILES); IPR009057 (SUPERFAMILY); IPR029058 (SUPERFAMILY)	F:GO:0003676; F:GO:0003677	F:nucleic acid binding; F:DNA binding
[INTERPRO, BLASTED, MAPPED, ANNOTATED]	gene_ID_unitig30_41	A0A1A0H822_9ASCOGolgi apparatus membrane TVP23 OS=Metschnikowia bicuspidata bicuspidata NRRL YB-4993 GN=METBIDRAFT_45061 PE=3 SV=1	181	20	5.12719e-90	84.1	3	P:GO:0016192; C:GO:0030173; C:GO:0005783	P:vesicle-mediated transport; C:integral component of Golgi membrane; C:endoplasmic reticulum	IPR008564 (PFAM); PTHR13019:SF15 (PANTHER); IPR008564 (PANTHER); TMhelix (TMHMM); TMhelix (TMHMM); TMhelix (TMHMM)	C:GO:0016021	C:integral component of membrane
[INTERPRO, BLASTED, MAPPED, ANNOTATED]	gene_ID_unitig30_42	A0A1A0H7Q9_9ASCO vacuolar sorting-associated OS=Metschnikowia bicuspidata bicuspidata NRRL YB-4993 GN=METBIDRAFT_45021 PE=4 SV=1	1027	20	0	68.1	8	C:GO:0043229; P:GO:0007033; P:GO:0033043; C:GO:0016020; P:GO:0015031; C:GO:0044444; F:GO:0005488; C:GO:0043227	C:intracellular organelle; P:vacuole organization; P:regulation of organelle organization; C:membrane; P:protein transport; C:cytoplasmic part; F:binding; C:membrane-bounded organelle	IPR000547 (SMART); IPR015943 (G3DSA:2.130.10.GENE3D); IPR011990 (G3DSA:1.25.40.GENE3D); IPR016902 (PIRSF); IPR000547 (PFAM); mobidb-lite (MOBIDB_LITE); mobidb-lite (MOBIDB_LITE); PTHR12616 (PANTHER); PTHR12616:SF9 (PANTHER); IPR000547 (PROSITE_PROFILES); IPR017986 (SUPERFAMILY)	P:GO:0016192; F:GO:0005515; P:GO:0046907; P:GO:0006886	P:vesicle-mediated transport; F:protein binding; P:intracellular transport; P:intracellular protein transport
[INTERPRO, BLASTED, MAPPED, ANNOTATED]	gene_ID_unitig30_43	A0A1L0CVE3_9ASCOCIC11C00000002786 OS=	831	20	0	62.15	3	P:GO:0046907; C:GO:0044424; P:GO:0048193	P:intracellular transport; C:intracellular part; P:Golgi vesicle transport	IPR007265 (PFAM); mobidb-lite (MOBIDB_LITE); IPR007265 (PANTHER)	C:GO:0005801; C:GO:0016020; P:GO:0006886	C:cis-Golgi network; C:membrane; P:intracellular protein transport
[INTERPRO, BLASTED, MAPPED, ANNOTATED]	gene_ID_unitig30_44	A0A1L0B841_9ASCOCIC11C00000000324 OS=	605	20	0	54.05	3	F:GO:0003677; P:GO:0006260; C:GO:0044427	F:DNA binding; P:DNA replication; C:chromosomal part	Coil (COILS); G3DSA:2.40.50.140 (GENE3D); IPR015408 (PFAM); mobidb-lite (MOBIDB_LITE); mobidb-lite (MOBIDB_LITE); mobidb-lite (MOBIDB_LITE); mobidb-lite (MOBIDB_LITE); PTHR13454 (PANTHER); IPR012340 (SUPERFAMILY)	C:GO:0005634; P:GO:0006260	C:nucleus; P:DNA replication
[INTERPRO, BLASTED, MAPPED, ANNOTATED]	gene_ID_unitig30_45	A0A1L0CZT6_9ASCOCIC11C00000004844 OS=	423	20	1.19789e-120	82.15	5	F:GO:0016712; F:GO:0005506; C:GO:0016021; P:GO:0055114; F:GO:0020037	F:oxidoreductase activity, acting on paired donors, with incorporation or reduction of molecular oxygen, reduced flavin or flavoprotein as one donor, and incorporation of one atom of oxygen; F:iron ion binding; C:integral component of membrane; P:oxidation-reduction process; F:heme binding	EC:1.14.14	Acting on paired donors, with incorporation or reduction of molecular oxygen. The oxygen incorporated need not be derived from O(2)	IPR001128 (PRINTS); IPR002402 (PRINTS); IPR002974 (PRINTS); G3DSA:1.10.630.10 (GENE3D); IPR001128 (PFAM); G3DSA:1.10.630.10 (GENE3D); PTHR24287 (PANTHER); PTHR24287:SF9 (PANTHER); IPR017972 (PROSITE_PATTERNS); IPR001128 (SUPERFAMILY); TMhelix (TMHMM)	F:GO:0016712; F:GO:0016705; F:GO:0005506; P:GO:0055114; F:GO:0004497; F:GO:0020037
[INTERPRO, BLASTED, MAPPED, ANNOTATED]	gene_ID_unitig30_46	A0A1A0H818_9ASCOMetal-dependent hydrolase OS=Metschnikowia bicuspidata bicuspidata NRRL YB-4993 GN=METBIDRAFT_79421 PE=4 SV=1	336	20	0	85.5	2	C:GO:0005634; C:GO:0005737	C:nucleus; C:cytoplasm	IPR003226 (PFAM); IPR003226 (PANTHER); PTHR11215:SF5 (PANTHER)	no GO terms	no GO terms
[INTERPRO, BLASTED, MAPPED, ANNOTATED]	gene_ID_unitig30_47	A0A1A0H7Q4_9ASCODUF1774-domain-containing OS=Metschnikowia bicuspidata bicuspidata NRRL YB-4993 GN=METBIDRAFT_79420 PE=4 SV=1	269	20	1.97673e-164	70	1	C:GO:0016021	C:integral component of membrane	IPR013920 (PFAM); PTHR37992 (PANTHER); PTHR37992:SF2 (PANTHER); TMhelix (TMHMM); TMhelix (TMHMM); TMhelix (TMHMM); TMhelix (TMHMM); TMhelix (TMHMM); TMhelix (TMHMM); TMhelix (TMHMM)	no GO terms	no GO terms
[INTERPRO, BLASTED, MAPPED, ANNOTATED]	gene_ID_unitig30_48	A0A1A0H8B2_9ASCOCse-1domain-containing OS=Metschnikowia bicuspidata bicuspidata NRRL YB-4993 GN=METBIDRAFT_44913 PE=4 SV=1	1322	20	0	78.25	3	C:GO:0005635; P:GO:0006611; F:GO:0008536	C:nuclear envelope; P:protein export from nucleus; F:Ran GTPase binding	IPR001494 (SMART); IPR013713 (PFAM); IPR005043 (PFAM); IPR001494 (PFAM); TIGR00803 (TIGRFAM); IPR011989 (G3DSA:1.25.10.GENE3D); PTHR10997 (PANTHER); PTHR10997:SF43 (PANTHER); PS51257 (PROSITE_PROFILES); IPR001494 (PROSITE_PROFILES); SSF103481 (SUPERFAMILY); IPR016024 (SUPERFAMILY); TMhelix (TMHMM); TMhelix (TMHMM); TMhelix (TMHMM); TMhelix (TMHMM); TMhelix (TMHMM); TMhelix (TMHMM); TMhelix (TMHMM…	F:GO:0005515; P:GO:0006886; F:GO:0005488; F:GO:0008536	F:protein binding; P:intracellular protein transport; F:binding; F:Ran GTPase binding
[INTERPRO, BLASTED, MAPPED, ANNOTATED]	gene_ID_unitig30_49	A0A1L0BF74_9ASCOCIC11C00000002038 OS=	249	20	8.36712e-87	69.6	8	C:GO:0016602; F:GO:0001077; F:GO:0000979; F:GO:0000978; P:GO:0006366; P:GO:0000436; P:GO:0043457; P:GO:0033217	C:CCAAT-binding factor complex; F:transcriptional activator activity, RNA polymerase II core promoter proximal region sequence-specific binding; F:RNA polymerase II core promoter sequence-specific DNA binding; F:RNA polymerase II core promoter proximal region sequence-specific DNA binding; P:transcription from RNA polymerase II promoter; P:carbon catabolite activation of transcription from RNA po…	IPR001289 (PRINTS); IPR001289 (SMART); IPR001289 (PFAM); mobidb-lite (MOBIDB_LITE); mobidb-lite (MOBIDB_LITE); IPR001289 (PANTHER); PTHR12632:SF24 (PANTHER); IPR018362 (PROSITE_PATTERNS); IPR001289 (PROSITE_PROFILES)	F:GO:0003677; C:GO:0016602; F:GO:0003700; P:GO:0006355	F:DNA binding; C:CCAAT-binding factor complex; F:transcription factor activity, sequence-specific DNA binding; P:regulation of transcription, DNA-templated
[INTERPRO, BLASTED]	gene_ID_unitig30_50	A0A1A0H813_9ASCOUncharacterized protein OS=Metschnikowia bicuspidata var. bicuspidata NRRL YB-4993 GN=METBIDRAFT_33075 PE=4 SV=1	72	1	0.000975639	57	no IPS match	no IPS match	no IPS match
[INTERPRO, BLASTED, MAPPED]	gene_ID_unitig30_51	A0A1L0BBM1_9ASCOCIC11C00000004653 OS=	904	20	3.8735e-178	46.1	5	C:GO:0017119; P:GO:0008150; P:GO:0006891; C:GO:0005575; F:GO:0003674	C:Golgi transport complex; P:biological_process; P:intra-Golgi vesicle-mediated transport; C:cellular_component; F:molecular_function	Coil (COILS); Coil (COILS); PF08700 (PFAM); PTHR31658:SF3 (PANTHER); IPR033370 (PANTHER)	C:GO:0017119; P:GO:0006891	C:Golgi transport complex; P:intra-Golgi vesicle-mediated transport
[INTERPRO, BLASTED, MAPPED]	gene_ID_unitig30_52	A0A1L0FZ05_9ASCOCIC11C00000001380 OS=	282	20	2.52327e-153	71.1	4	P:GO:0008150; F:GO:0004386; C:GO:0030686; F:GO:0003674	P:biological_process; F:helicase activity; C:90S preribosome; F:molecular_function	IPR032704 (PFAM); mobidb-lite (MOBIDB_LITE); mobidb-lite (MOBIDB_LITE); PTHR24030:SF1 (PANTHER); IPR032704 (PANTHER)	no GO terms	no GO terms
[INTERPRO, BLASTED, MAPPED, ANNOTATED]	gene_ID_unitig30_53	A0A1A0H8A7_9ASCOGIDA-domain-containing OS=Metschnikowia bicuspidata bicuspidata NRRL YB-4993 GN=METBIDRAFT_33071 PE=4 SV=1	683	20	0	83.7	5	F:GO:0016491; F:GO:0050660; C:GO:0005739; P:GO:0055114; P:GO:0070899	F:oxidoreductase activity; F:flavin adenine dinucleotide binding; C:mitochondrion; P:oxidation-reduction process; P:mitochondrial tRNA wobble uridine modification	SM01228 (SMART); IPR026904 (PFAM); IPR004416 (TIGRFAM); IPR023753 (G3DSA:3.50.50.GENE3D); IPR002218 (PFAM); IPR004416 (PTHR11806:PANTHER); IPR002218 (PANTHER); IPR020595 (PROSITE_PATTERNS); IPR023753 (SUPERFAMILY)	F:GO:0016491; F:GO:0050660; P:GO:0008033; P:GO:0055114; P:GO:0002098	F:oxidoreductase activity; F:flavin adenine dinucleotide binding; P:tRNA processing; P:oxidation-reduction process; P:tRNA wobble uridine modification
[INTERPRO, BLASTED, MAPPED]	gene_ID_unitig30_54	A0A1L0FSQ8_9ASCOCIC11C00000003624 OS=	612	20	3.67265e-166	53.25	3	P:GO:0008150; F:GO:0046982; C:GO:0005575	P:biological_process; F:protein heterodimerization activity; C:cellular_component	G3DSA:1.10.20.10 (GENE3D); PF15511 (PFAM); mobidb-lite (MOBIDB_LITE); mobidb-lite (MOBIDB_LITE); mobidb-lite (MOBIDB_LITE); mobidb-lite (MOBIDB_LITE); mobidb-lite (MOBIDB_LITE); IPR009072 (SUPERFAMILY)	F:GO:0046982	F:protein heterodimerization activity
[INTERPRO, BLASTED, MAPPED, ANNOTATED]	gene_ID_unitig30_55	A0A1A0H808_9ASCOMitochondrial carrier OS=Metschnikowia bicuspidata bicuspidata NRRL YB-4993 GN=METBIDRAFT_13133 PE=3 SV=1	392	20	0	66.7	1	C:GO:0016020	C:membrane	IPR018108 (PFAM); IPR023395 (G3DSA:1.50.40.GENE3D); mobidb-lite (MOBIDB_LITE); PTHR24089 (PANTHER); PTHR24089:SF488 (PANTHER); IPR018108 (PROSITE_PROFILES); IPR018108 (PROSITE_PROFILES); IPR018108 (PROSITE_PROFILES); IPR023395 (SUPERFAMILY); TMhelix (TMHMM)	no GO terms	no GO terms
[INTERPRO, BLASTED, MAPPED, ANNOTATED]	gene_ID_unitig30_56	A0A1L0CVF8_9ASCOCIC11C00000002968 OS=	217	20	1.58152e-102	55.85	4	P:GO:0044260; P:GO:0051276; F:GO:0016740; P:GO:0044238	P:cellular macromolecule metabolic process; P:chromosome organization; F:transferase activity; P:primary metabolic process	IPR028009 (PFAM); IPR028005 (PFAM); PTHR11076:SF41 (PANTHER); PTHR11076 (PANTHER)	no GO terms	no GO terms
[INTERPRO, BLASTED, MAPPED, ANNOTATED]	gene_ID_unitig30_57	A0A1A0H897_9ASCONicotinate-nucleotide pyrophosphorylase	298	20	0	89.4	4	C:GO:0005634; F:GO:0042802; F:GO:0004514; P:GO:0034354	C:nucleus; F:identical protein binding; F:nicotinate-nucleotide diphosphorylase (carboxylating) activity; P:'de novo' NAD biosynthetic process from tryptophan	EC:2.4.2.19	Nicotinate-nucleotide diphosphorylase (carboxylating)	IPR022412 (PFAM); IPR004393 (TIGRFAM); IPR027277 (PIRSF); IPR002638 (PFAM); IPR022412 (G3DSA:3.90.1170.GENE3D); IPR013785 (G3DSA:3.20.20.GENE3D); PTHR32179:SF4 (PANTHER); IPR027277 (PANTHER); IPR004393 (CDD); SSF54675 (SUPERFAMILY); IPR002638 (SUPERFAMILY)	F:GO:0004514; F:GO:0003824; P:GO:0019363; P:GO:0009435; F:GO:0016763
[INTERPRO, BLASTED, MAPPED, ANNOTATED]	gene_ID_unitig30_58	A0A1A0H8A3_9ASCOGalactose-binding like OS=Metschnikowia bicuspidata bicuspidata NRRL YB-4993 GN=METBIDRAFT_45135 PE=4 SV=1	346	20	3.44854e-162	70.25	3	C:GO:0005634; C:GO:0044444; P:GO:0009987	C:nucleus; C:cytoplasmic part; P:cellular process	IPR004939 (SMART); IPR004939 (PFAM); IPR008979 (G3DSA:2.60.120.GENE3D); mobidb-lite (MOBIDB_LITE); mobidb-lite (MOBIDB_LITE); IPR016901 (PANTHER); IPR004939 (PROSITE_PROFILES); cd08366 (CDD); IPR008979 (SUPERFAMILY)	C:GO:0005680; P:GO:0031145	C:anaphase-promoting complex; P:anaphase-promoting complex-dependent catabolic process
[INTERPRO, BLASTED, MAPPED, ANNOTATED]	gene_ID_unitig30_59	A0A1A0H7W6_9ASCOCell wall assembly and cell proliferation coordinating OS=Metschnikowia bicuspidata bicuspidata NRRL YB-4993 GN=METBIDRAFT_44472 PE=4 SV=1	531	20	0	71.3	1	P:GO:0042546	P:cell wall bio_	genesis	Coil (COILS); IPR018958 (SMART); IPR009203 (PIRSF); IPR018958 (PFAM); G3DSA:3.40.1580.10 (GENE3D); mobidb-lite (MOBIDB_LITE); mobidb-lite (MOBIDB_LITE); mobidb-lite (MOBIDB_LITE); PTHR14289:SF24 (PANTHER); PTHR14289 (PANTHER); SSF160631 (SUPERFAMILY)	P:GO:0042546	P:cell wall bio__
[INTERPRO, BLASTED, MAPPED, ANNOTATED]	gene_ID_unitig30_60	A0A1A0H803_9ASCOGCS-domain-containing OS=Metschnikowia bicuspidata bicuspidata NRRL YB-4993 GN=METBIDRAFT_13129 PE=4 SV=1	758	20	0	77.4	5	P:GO:0006750; P:GO:0046686; P:GO:0042542; C:GO:0005622; F:GO:0004357	P:glutathione biosynthetic process; P:response to cadmium ion; P:response to hydrogen peroxide; C:intracellular; F:glutamate-cysteine ligase activity	EC:6.3.2.2	Glutamate--cysteine ligase	IPR004308 (PFAM); IPR004308 (PANTHER); SSF55931 (SUPERFAMILY)	P:GO:0006750; F:GO:0004357
[INTERPRO, BLASTED, MAPPED, ANNOTATED]	gene_ID_unitig30_61	A0A1A0H7N9_9ASCOPhosphoribosylamine--glycine ligase OS=Metschnikowia bicuspidata bicuspidata NRRL YB-4993 GN=METBIDRAFT_79409 PE=3 SV=1	1165	20	0	89.35	7	F:GO:0005524; C:GO:0005737; F:GO:0004637; F:GO:0046872; P:GO:0006189; P:GO:0009113; F:GO:0004641	F:ATP binding; C:cytoplasm; F:phosphoribosylamine-glycine ligase activity; F:metal ion binding; P:'de novo' IMP biosynthetic process; P:purine nucleobase biosynthetic process; F:phosphoribosylformylglycinamidine cyclo-ligase activity	EC:6.3.4.13; EC:6.3.3.1	Phosphoribosylamine--glycine ligase; Phosphoribosylformylglycinamidine cyclo-ligase	SM01209 (SMART); IPR020560 (SMART); IPR000999 (SMART); IPR020561 (PFAM); IPR013815 (G3DSA:3.30.1490.GENE3D); G3DSA:3.30.470.20 (GENE3D); IPR016188 (PFAM); IPR010918 (G3DSA:3.90.650.GENE3D); IPR020560 (PFAM); IPR020562 (PFAM); IPR020560 (G3DSA:3.90.600.GENE3D); IPR010918 (PFAM); IPR016188 (G3DSA:3.30.1330.GENE3D); IPR000115 (TIGRFAM); G3DSA:3.40.50.20 (GENE3D); IPR004733 (TIGRFAM); IPR000999 (G3DS…	F:GO:0005524; F:GO:0004525; F:GO:0004637; F:GO:0003824; C:GO:0005737; F:GO:0046872; P:GO:0006189; P:GO:0006396; P:GO:0009113; F:GO:0004641
[INTERPRO, BLASTED, MAPPED, ANNOTATED]	gene_ID_unitig30_62	A0A1L0CUL8_9ASCOCIC11C00000001378 OS=	369	20	0	81.55	3	P:GO:0000162; C:GO:0005829; F:GO:0004048	P:tryptophan biosynthetic process; C:cytosol; F:anthranilate phosphoribosyltransferase activity	EC:2.4.2.18	Anthranilate phosphoribosyltransferase	IPR017459 (PFAM); IPR000312 (G3DSA:3.40.1030.GENE3D); IPR005940 (TIGRFAM); IPR000312 (PFAM); G3DSA:1.20.970.10 (GENE3D); PTHR43285:SF3 (PANTHER); PTHR43285 (PANTHER); IPR005940 (HAMAP); IPR000312 (SUPERFAMILY); IPR017459 (SUPERFAMILY)	F:GO:0016757; P:GO:0000162; P:GO:0008152; F:GO:0004048
[INTERPRO, BLASTED, MAPPED]	gene_ID_unitig30_63	A0A1L0B864_9ASCOCIC11C00000002576 OS=	427	20	0	62.75	6	C:GO:0016020; C:GO:0016021; P:GO:0006486; C:GO:0005783; F:GO:0003674; P:GO:0006621	C:membrane; C:integral component of membrane; P:protein glycosylation; C:endoplasmic reticulum; F:molecular_function; P:protein retention in ER lumen	Coil (COILS); IPR004342 (PFAM); PTHR10783 (PANTHER); PTHR10783:SF65 (PANTHER); IPR004342 (PROSITE_PROFILES); TMhelix (TMHMM); TMhelix (TMHMM); TMhelix (TMHMM); TMhelix (TMHMM); TMhelix (TMHMM)	C:GO:0016021	C:integral component of membrane
[INTERPRO, BLASTED, MAPPED]	gene_ID_unitig30_64	A0A1L0BBN9_9ASCOCIC11C00000005094 OS=	260	20	4.54888e-136	72.1	5	C:GO:0005737; C:GO:0016020; C:GO:0016021; P:GO:0006364; F:GO:0003674	C:cytoplasm; C:membrane; C:integral component of membrane; P:rRNA processing; F:molecular_function	Coil (COILS); IPR019186 (PFAM); mobidb-lite (MOBIDB_LITE); mobidb-lite (MOBIDB_LITE); mobidb-lite (MOBIDB_LITE); mobidb-lite (MOBIDB_LITE); IPR019186 (PANTHER)	no GO terms	no GO terms
[INTERPRO, BLASTED, MAPPED, ANNOTATED]	gene_ID_unitig30_65	A0A1L0B9V3_9ASCOCIC11C00000005467 OS=	180	20	3.37025e-79	65.65	7	F:GO:0003676; C:GO:0005634; P:GO:0016072; P:GO:0071046; P:GO:0034472; P:GO:0071028; P:GO:0071840	F:nucleic acid binding; C:nucleus; P:rRNA metabolic process; P:nuclear polyadenylation-dependent ncRNA catabolic process; P:snRNA 3'-end processing; P:nuclear mRNA surveillance; P:cellular component organization or bio_	genesis	Coil (COILS); IPR007146 (PFAM); mobidb-lite (MOBIDB_LITE); IPR011082 (PANTHER); PTHR15341:SF5 (PANTHER)	no GO terms	no GO terms
[INTERPRO, BLASTED, MAPPED, ANNOTATED]	gene_ID_unitig30_66	A0A1L0FYW4_9ASCOCIC11C00000001584 OS=	1148	20	0	65.8	9	F:GO:0042802; P:GO:0090501; C:GO:0043231; C:GO:0016021; P:GO:0016043; F:GO:0004540; F:GO:0004672; P:GO:0006468; P:GO:0044699	F:identical protein binding; P:RNA phosphodiester bond hydrolysis; C:intracellular membrane-bounded organelle; C:integral component of membrane; P:cellular component organization; F:ribonuclease activity; F:protein kinase activity; P:protein phosphorylation; P:single-organism process	IPR018997 (SMART); IPR000719 (SMART); IPR018391 (SMART); IPR010513 (PFAM); G3DSA:1.10.510.10 (GENE3D); IPR000719 (PFAM); G3DSA:3.30.200.20 (GENE3D); G3DSA:2.140.10.10 (GENE3D); mobidb-lite (MOBIDB_LITE); PTHR13954:SF21 (PANTHER); PTHR13954 (PANTHER); IPR008271 (PROSITE_PATTERNS); IPR010513 (PROSITE_PROFILES); IPR000719 (PROSITE_PROFILES); cd09769 (CDD); cd10422 (CDD); IPR011047 (SUPERFAMILY); IPR…	F:GO:0005524; F:GO:0004672; F:GO:0004540; P:GO:0006397; P:GO:0006468	F:ATP binding; F:protein kinase activity; F:ribonuclease activity; P:mRNA processing; P:protein phosphorylation
[INTERPRO, BLASTED, MAPPED]	gene_ID_unitig30_67	A0A1L0BF39_9ASCOCIC11C00000005757 OS=	840	20	0	56.4	5	P:GO:0005975; C:GO:0016020; C:GO:0016021; F:GO:0016740; F:GO:0004553	P:carbohydrate metabolic process; C:membrane; C:integral component of membrane; F:transferase activity; F:hydrolase activity, hydrolyzing O-glycosyl compounds	IPR004182 (SMART); IPR004182 (PFAM); IPR031968 (PFAM); mobidb-lite (MOBIDB_LITE); mobidb-lite (MOBIDB_LITE); mobidb-lite (MOBIDB_LITE); mobidb-lite (MOBIDB_LITE); mobidb-lite (MOBIDB_LITE); PTHR23319 (PANTHER); PTHR23319:SF32 (PANTHER); IPR031968 (PROSITE_PROFILES); cd13220 (CDD); TMhelix (TMHMM)	no GO terms	no GO terms
[INTERPRO, BLASTED, MAPPED, ANNOTATED]	gene_ID_unitig30_68	A0A1A0H7Z4_9ASCOSure OS=Metschnikowia bicuspidata bicuspidata NRRL YB-4993 GN=METBIDRAFT_33064 PE=4 SV=1	334	20	0	74.15	5	C:GO:0030287; C:GO:0005576; P:GO:0009405; F:GO:0003993; C:GO:0009986	C:cell wall-bounded periplasmic space; C:extracellular region; P:patho_	genesis; F:acid phosphatase activity; C:cell surface	EC:3.1.3.41; EC:3.1.3.2	4-nitrophenylphosphatase; Acid phosphatase	IPR002828 (G3DSA:3.40.1210.GENE3D); IPR002828 (TIGRFAM); IPR002828 (PFAM); PTHR30457:SF8 (PANTHER); PTHR30457 (PANTHER); IPR002828 (SUPERFAMILY)
[INTERPRO, BLASTED, MAPPED, ANNOTATED]	gene_ID_unitig30_69	A0A1A0H7N0_9ASCOPeroxisomal bio_	genesis factor 3 OS=Metschnikowia bicuspidata bicuspidata NRRL YB-4993 GN=METBIDRAFT_212861 PE=4 SV=1	387	20	0	70	6	C:GO:0005779; P:GO:0045046; P:GO:0032581; P:GO:0045033; C:GO:0005783; F:GO:0030674	C:integral component of peroxisomal membrane; P:protein import into peroxisome membrane; P:ER-dependent peroxisome organization; P:peroxisome inheritance; C:endoplasmic reticulum; F:protein binding, bridging	IPR006966 (PFAM); PTHR28080 (PANTHER)	C:GO:0005779; P:GO:0007031	C:integral component of peroxisomal membrane; P:peroxisome organization
[INTERPRO, BLASTED, MAPPED, ANNOTATED]	gene_ID_unitig30_70	A0A1A0H883_9ASCOE3 ubiquitin ligase SCF Skp subunit OS=Metschnikowia bicuspidata bicuspidata NRRL YB-4993 GN=METBIDRAFT_79400 PE=3 SV=1	165	20	2.00804e-103	91.6	24	F:GO:0061630; P:GO:0060542; P:GO:0007096; P:GO:0045841; P:GO:0000921; P:GO:0043254; P:GO:0045116; P:GO:0051382; C:GO:0043224; P:GO:0000920; P:GO:0007035; P:GO:0042787; C:GO:0043291; F:GO:0003688; P:GO:0006998; P:GO:0000086; C:GO:0031518; P:GO:0000082; C:GO:0005829; P:GO:0031146; P:GO:0010458; P:GO:0016310; F:GO:0016301; C:GO:0017117	F:ubiquitin protein ligase activity; P:regulation of strand invasion; P:regulation of exit from mitosis; P:negative regulation of mitotic metaphase/anaphase transition; P:septin ring assembly; P:regulation of protein complex assembly; P:protein neddylation; P:kinetochore assembly; C:nuclear SCF ubiquitin ligase complex; P:cell separation after cytokinesis; P:vacuolar acidification; P:protein ubiq…	IPR001232 (SMART); IPR016897 (PIRSF); IPR016072 (PFAM); G3DSA:3.30.710.10 (GENE3D); IPR016073 (PFAM); PTHR11165:SF71 (PANTHER); PTHR11165 (PANTHER); IPR011333 (SUPERFAMILY); IPR016072 (SUPERFAMILY)	P:GO:0006511	P:ubiquitin-dependent protein catabolic process
[INTERPRO, BLASTED, MAPPED]	gene_ID_unitig30_71	A0A1L0BHE7_9ASCOCIC11C00000000854 OS=	423	20	1.06868e-151	53.55	3	P:GO:0008150; C:GO:0005575; F:GO:0003674	P:biological_process; C:cellular_component; F:molecular_function	no IPS match	no IPS match	no IPS match
[truncated: 8,025 more rows]
