# Supplementary material for: Genome Sequence, Assembly and Characterization of Two Metschnikowia fructicola Strains Used as Biocontrol Agents of Postharvest Diseases
Source: Front Microbiol. 2018 Apr 3;9:593. doi: 10.3389/fmicb.2018.00593 (PMC5891927; doi:10.3389/fmicb.2018.00593)
Supplement: TABLE S2 — CAZymes predicted in the M. fructicola 277 genome. [file Table_2.XLSX]

## Sheet: Supplementary_table_2_MF_cazyme
CAZy Families	SequenceID	Pfam domains	Domain descriptions
gene_ID=unitig4_7	AA3	Pyr_redox_2/Pyr_redox	Pyridine nucleotide-disulphide oxidoreductase. This family includes both class I and class II oxidoreductases and also NADH oxidases and peroxidases. This domain is actually a small NADH binding domain within a larger FAD binding domain./Pyridine nucleotide-disulphide oxidoreductase. This family includes both class I and class II oxidoreductases and also NADH oxidases and peroxidases. This domain…
gene_ID=unitig4_10	GT15	Hira	TUP-1like enhancer of split. The Hira proteins are found in a range of eukaryotes and are implicated in the assembly of repressive chromatin. These proteins also contain pfam00400.
gene_ID=unitig5_2	CE14	Flavin_Reduct	Flavin reductase like domain. This is a flavin reductase family consisting of enzymes known to be flavin reductases as well as various oxidoreductase and monooxygenase components. VlmR is a flavin reductase that functions in a two-component enzyme system to provide isobutylamine N-hydroxylase with reduced flavin and may be involved in the synthesis of valanimycin. SnaC is a flavin reductase that …
gene_ID=unitig9_12	CE11	Med20/DEAD/Helicase_C/DUF4217	TATA-binding related factor (TRF) of subunit 20 of Mediator complex. This family of proteins is related to TATA-binding protein (TBP). TBP is a highly conserved RNA polymerase II _	general transcription factor that binds to the core promoter and initiates assembly of the preinitiation complex. Human TRF has been shown to associate with an RNA polymerase II-SRB complex. This Med20 subunit of Mediator is found in the non-essential part of the head./DEAD/DEAH box helicase. Members of this family include the DEAD and DEAH box helicases. Helicases are involved in unwinding nucle…	genesis, nucleocytoplasmic transport, translation, RNA decay and organellar _	gene expression./Helicase conserved C-terminal domain. The Prosite family is restricted to DEAD/H helicases, whereas this domain family is found in a wide variety of helicases and helicase related proteins. It may be that this is not an autonomously folding unit, but an integral part of the helicase./Domain of unknown function (DUF4217). This short domain is found at the C-terminus of many helica…
gene_ID=unitig9_20	GT48	RVT_1	Reverse transcriptase (RNA-dependent DNA polymerase). A reverse transcriptase _	gene is usually indicative of a mobile element such as a retrotransposon or retrovirus. Reverse transcriptases occur in a variety of mobile elements, including retrotransposons, retroviruses, group II introns, bacterial msDNAs, hepadnaviruses, and caulimoviruses.
gene_ID=unitig9_25	CE11	HIRAN/SNF2_N/zf-RING_2/Helicase_C	HIRAN domain. The HIRAN domain (HIP116, Rad5p N-terminal) is found in the N-terminal regions of the SWI2/SNF2 proteins typified by HIP116 and Rad5p. The HIRAN domain is found as a standalone protein in several bacteria and prophages, or fused to other catalytic domains, such as a nuclease of the restriction endonuclease fold and TDP-1like DNA phosphoesterases, in the eukaryotes. It has been predi…
gene_ID=unitig9_31	CE11	Helicase_C/HA2	Helicase conserved C-terminal domain. The Prosite family is restricted to DEAD/H helicases, whereas this domain family is found in a wide variety of helicases and helicase related proteins. It may be that this is not an autonomously folding unit, but an integral part of the helicase./Helicase associated domain (HA2). This presumed domain is about 90 amino acid residues in length. It is found is a…
gene_ID=unitig9_37	GH65	HAD_2	Haloacid dehalogenase-like hydrolase.
gene_ID=unitig9_40	GH76	Glyco_hydro_76	Glycosyl hydrolase family 76. Family of alpha-1,6-mannanases.
gene_ID=unitig9_44	GH18	Glyco_hydro_18	Glycosyl hydrolases family 18.
gene_ID=unitig9_46	GT1	FYVE/Cpn60_TCP1/PIP5K	FYVE zinc finger. The FYVE zinc finger is named after four proteins that it has been found in: Fab1, YOTB/ZK632.12, Vac1, and EEA1. The FYVE finger has been shown to bind two Zn++ ions. The FYVE finger has eight potential zinc coordinating cysteine positions. Many members of this family also include two histidines in a motif R+HHC+XCG, where + represents a charged residue and X any residue. We ha…
gene_ID=unitig9_60	GH12	Peptidase_M16	Insulinase (Peptidase family M16).
gene_ID=unitig9_64	CBM21/GH92	CBM_21/adh_short/adh_short_C2	Putative phosphatase regulatory subunit. This family consists of several eukaryotic proteins that are thought to be involved in the regulation of glycogen metabolism. For instance, the mouse PTG protein has been shown to interact with glycogen synthase, phosphorylase kinase, phosphorylase a: these three enzymes have key roles in the regulation of glycogen metabolism. PTG also binds the catalytic …
gene_ID=unitig9_99	GH130	FAD_binding_6/NAD_binding_1/DBR1	Oxidoreductase FAD-binding domain. /Oxidoreductase NAD-binding domain. Xanthine dehydrogenases, that also bind FAD/NAD, have essentially no similarity./Lariat debranching enzyme, C-terminal domain. This presumed domain is found at the C-terminus of lariat debranching enzyme. This domain is always found in association with pfam00149.
gene_ID=unitig9_106	CE11	DEAD/Helicase_C	DEAD/DEAH box helicase. Members of this family include the DEAD and DEAH box helicases. Helicases are involved in unwinding nucleic acids. The DEAD box helicases are involved in various aspects of RNA metabolism, including nuclear transcription, pre mRNA splicing, ribosome bio_	genesis, nucleocytoplasmic transport, translation, RNA decay and organellar _	gene expression./Helicase conserved C-terminal domain. The Prosite family is restricted to DEAD/H helicases, whereas this domain family is found in a wide variety of helicases and helicase related proteins. It may be that this is not an autonomously folding unit, but an integral part of the helicase.
gene_ID=unitig9_107	GT1	FYVE	FYVE zinc finger. The FYVE zinc finger is named after four proteins that it has been found in: Fab1, YOTB/ZK632.12, Vac1, and EEA1. The FYVE finger has been shown to bind two Zn++ ions. The FYVE finger has eight potential zinc coordinating cysteine positions. Many members of this family also include two histidines in a motif R+HHC+XCG, where + represents a charged residue and X any residue. We ha…
gene_ID=unitig12_7	GH84	Peptidase_M24/SPT16/Rtt106/Miro/Ras	Metallopeptidase family M24. This family contains metallopeptidases. It also contains non-peptidase homologues such as the N terminal domain of Spt16 which is a histone H3-H4 binding module./FACT complex subunit (SPT16/CDC68). Proteins in this family are subunits the FACT complex. The FACT complex plays a role in transcription initiation and promotes binding of TATA-binding protein (TBP) to a TAT…
gene_ID=unitig12_21	CE11	DEAD/Helicase_C	DEAD/DEAH box helicase. Members of this family include the DEAD and DEAH box helicases. Helicases are involved in unwinding nucleic acids. The DEAD box helicases are involved in various aspects of RNA metabolism, including nuclear transcription, pre mRNA splicing, ribosome bio_	genesis, nucleocytoplasmic transport, translation, RNA decay and organellar _	gene expression./Helicase conserved C-terminal domain. The Prosite family is restricted to DEAD/H helicases, whereas this domain family is found in a wide variety of helicases and helicase related proteins. It may be that this is not an autonomously folding unit, but an integral part of the helicase.
gene_ID=unitig12_22	GT87	NUDIX	NUDIX domain.
gene_ID=unitig12_25	GT57	WAC_Acf1_DNA_bd/DDT	ATP-utilising chromatin assembly and remodelling N-terminal. ACF (for ATP-utilising chromatin assembly and remodelling factor) is a chromatin-remodelling complex that catalyzes the ATP-dependent assembly of periodic nucleosome arrays. The WAC (WSTF/Acf1/cbp146) domain is an approximately 110-residue module present at the N-termini of Acf-1related proteins in a variety of organisms. The DNA-bindin…
gene_ID=unitig12_26	GH76	ADH_N/ADH_zinc_N	Alcohol dehydrogenase GroES-like domain. This is the catalytic domain of alcohol dehydrogenases. Many of them contain an inserted zinc binding domain. This domain has a GroES-like structure./Zinc-binding dehydrogenase.
gene_ID=unitig12_38	GT1	PH	PH domain. PH stands for pleckstrin homology.
gene_ID=unitig12_42	GT90	Thioredoxin	Thioredoxin. Thioredoxins are small enzymes that participate in redox reactions, via the reversible oxidation of an active centre disulfide bond. Some members with only the active site are not separated from the noise.
gene_ID=unitig12_45	GH38	Glyco_hydro_38/Alpha-mann_mid/Glyco_hydro_38C	Glycosyl hydrolases family 38 N-terminal domain. Glycosyl hydrolases are key enzymes of carbohydrate metabolism./Alpha mannosidase, middle domain. Members of this family adopt a structure consisting of three alpha helices, in an immunoglobulin/albumin-binding domain-like fold. They are predominantly found in the enzyme alpha-mannosidase./Glycosyl hydrolases family 38 C-terminal domain. Glycosyl h…
gene_ID=unitig12_49	GH18	Na_Ca_ex	Sodium/calcium exchanger protein. This is a family of sodium/calcium exchanger integral membrane proteins. This family covers the integral membrane regions of the proteins. Sodium/calcium exchangers regulate intracellular Ca2+ concentrations in many cells; cardiac myocytes, epithelial cells, neurons retinal rod photoreceptors and smooth muscle cells. Ca2+ is moved into or out of the cytosol depen…
gene_ID=unitig12_50	GT50	Cyclin_N	Cyclin, N-terminal domain. Cyclins regulate cyclin dependent kinases (CDKs). Human cyclin-O is a Uracil-DNA glycosylase that is related to other cyclins. Cyclins contain two domains of similar all-alpha fold, of which this family corresponds with the N-terminal domain.
gene_ID=unitig12_52	GT2	ketoacyl-synt/Ketoacyl-synt_C	Beta-ketoacyl synthase, N-terminal domain. The structure of beta-ketoacyl synthase is similar to that of the thiolase family (pfam00108) and also chalcone synthase. The active site of beta-ketoacyl synthase is located between the N and C-terminal domains. The N-terminal domain contains most of the structures involved in dimer formation and also the active site cysteine./Beta-ketoacyl synthase, C-…
gene_ID=unitig12_53	GH16	SKN1/SKN1	Beta-glucan synthesis-associated protein (SKN1). This family consists of the beta-glucan synthesis-associated proteins KRE6 and SKN1. Beta1,6-Glucan is a key component of the yeast cell wall, interconnecting cell wall proteins, beta1,3-glucan, and chitin. It has been postulated that the synthesis of beta1,6-glucan begins in the endoplasmic reticulum with the formation of protein-bound primer stru…
gene_ID=unitig14_2	GT48	Sugar_tr	Sugar (and other) transporter.
gene_ID=unitig14_21	CE11	DEAD/Helicase_C	DEAD/DEAH box helicase. Members of this family include the DEAD and DEAH box helicases. Helicases are involved in unwinding nucleic acids. The DEAD box helicases are involved in various aspects of RNA metabolism, including nuclear transcription, pre mRNA splicing, ribosome bio_	genesis, nucleocytoplasmic transport, translation, RNA decay and organellar _	gene expression./Helicase conserved C-terminal domain. The Prosite family is restricted to DEAD/H helicases, whereas this domain family is found in a wide variety of helicases and helicase related proteins. It may be that this is not an autonomously folding unit, but an integral part of the helicase.
gene_ID=unitig14_22	GT8	Glyco_transf_8	Glycosyl transferase family 8. This family includes enzymes that transfer sugar residues to donor molecules. Members of this family are involved in lipopolysaccharide biosynthesis and glycogen synthesis. This family includes Lipopolysaccharide galactosyltransferase, lipopolysaccharide glucosyltransferase 1, and glycogenin glucosyltransferase.
gene_ID=unitig14_24	GT83	Miro/Ras/PAP2	Miro-like protein. Mitochondrial Rho proteins (Miro-1, and Miro-2), are atypical Rho GTPases. They have a unique domain organisation, with tandem GTP-binding domains and two EF hand domains (pfam00036), that may bind calcium. They are also larger than classical small GTPases. It has been proposed that they are involved in mitochondrial homeostasis and apoptosis./Ras family. Includes sub-families …
gene_ID=unitig14_29	CE4/GH10	Epimerase/NmrA/NAD_binding_10/OHCU_decarbox	NAD dependent epimerase/dehydratase family. This family of proteins utilise NAD as a cofactor. The proteins in this family use nucleotide-sugar substrates for a variety of chemical reactions./NmrA-like family. NmrA is a negative transcriptional regulator involved in the post-translational modification of the transcription factor AreA. NmrA is part of a system controlling nitrogen metabolite repre…
gene_ID=unitig14_37	GH16	Glyco_hydro_16	Glycosyl hydrolases family 16.
gene_ID=unitig14_38	GH16	Glyco_hydro_16	Glycosyl hydrolases family 16.
gene_ID=unitig14_40	GT41	TPR_11/PPP5/Metallophos	TPR repeat. /PPP5 TPR repeat region. This region is specific to the PPP5 subfamily of serine/threonine phosphatases and contains TPR repeats./Calcineurin-like phosphoesterase. This family includes a diverse range of phosphoesterases, including protein phosphoserine phosphatases, nucleotidases, sphingomyelin phosphodiesterases and 2'-3' cAMP phosphodiesterases as well as nucleases such as bacteria…
gene_ID=unitig14_44	GT15	Glyco_transf_15/Glyco_transf_15/Glyco_transf_15	Glycolipid 2-alpha-mannosyltransferase. This is a family of alpha-1,2 mannosyl-transferases involved in N-linked and O-linked glycosylation of proteins. Some of the enzymes in this family have been shown to be involved in O- and N-linked glycan modifications in the Golgi./Glycolipid 2-alpha-mannosyltransferase. This is a family of alpha-1,2 mannosyl-transferases involved in N-linked and O-linked …
gene_ID=unitig14_47	CBM13	HSP70/MreB_Mbl	Hsp70 protein. Hsp70 chaperones help to fold many proteins. Hsp70 assisted folding involves repeated cycles of substrate binding and release. Hsp70 activity is ATP dependent. Hsp70 proteins are made up of two regions: the amino terminus is the ATPase domain and the carboxyl terminus is the substrate binding region./MreB/Mbl protein. This family consists of bacterial MreB and Mbl proteins as well …
gene_ID=unitig14_56	GT31	Adaptin_N	Adaptin N terminal region. This family consists of the N terminal region of various alpha, beta and gamma subunits of the AP-1, AP-2 and AP-3 adaptor protein complexes. The adaptor protein (AP) complexes are involved in the formation of clathrin-coated pits and vesicles. The N-terminal region of the various adaptor proteins (APs) is constant by comparison to the C-terminal which is variable withi…
gene_ID=unitig14_58	CBM51	Metallopep	Putative peptidase family. This family of proteins is functionally uncharacterized. However, it does contain an HEXXH motif characteristic of metallopeptidases. This protein is found in bacteria and eukaryotes. Proteins in this family are typically between 625 to 773 amino acids in length.
gene_ID=unitig15_8	GH55	Cupin_8/Cupin_8	Cupin-like domain. This cupin like domain shares similarity to the JmjC domain./Cupin-like domain. This cupin like domain shares similarity to the JmjC domain.
gene_ID=unitig15_9	GT50	Cyclin_N	Cyclin, N-terminal domain. Cyclins regulate cyclin dependent kinases (CDKs). Human cyclin-O is a Uracil-DNA glycosylase that is related to other cyclins. Cyclins contain two domains of similar all-alpha fold, of which this family corresponds with the N-terminal domain.
gene_ID=unitig19_2	AA3	Pyr_redox_2	Pyridine nucleotide-disulphide oxidoreductase. This family includes both class I and class II oxidoreductases and also NADH oxidases and peroxidases. This domain is actually a small NADH binding domain within a larger FAD binding domain.
gene_ID=unitig19_4	GT48	MFS_1	Major Facilitator Superfamily.
gene_ID=unitig19_13	GT30	NAD_binding_2/6PGD	NAD binding domain of 6-phosphogluconate dehydrogenase. The NAD binding domain of 6-phosphogluconate dehydrogenase adopts a Rossmann fold./6-phosphogluconate dehydrogenase, C-terminal domain. This family represents the C-terminal all-alpha domain of 6-phosphogluconate dehydrogenase. The domain contains two structural repeats of 5 helices each.
gene_ID=unitig19_14	GT34	p450	Cytochrome P450. Cytochrome P450s are haem-thiolate proteins involved in the oxidative degradation of various compounds. They are particularly well known for their role in the degradation of environmental toxins and mutagens. They can be divided into 4 classes, according to the method by which electrons from NAD(P)H are delivered to the catalytic site. Sequence conservation is relatively low with…	general topography and structural fold are highly conserved. The conserved core is composed of a coil termed the 'meander', a four-helix bundle, helices J and K, and two sets of beta-sheets. These constitute the haem-binding loop (with an absolutely conserved cysteine that serves as the 5th ligand for the haem iron), the proton-transfer groove and the absolutely conserved EXXR motif in helix K. W…	general enzymatic function is to catalyze regiospecific and stereospecific oxidation of non-activated hydrocarbons at physiological temperatures.
gene_ID=unitig19_28	GT90	Thioredoxin/Thioredoxin	Thioredoxin. Thioredoxins are small enzymes that participate in redox reactions, via the reversible oxidation of an active centre disulfide bond. Some members with only the active site are not separated from the noise./Thioredoxin. Thioredoxins are small enzymes that participate in redox reactions, via the reversible oxidation of an active centre disulfide bond. Some members with only the active …
gene_ID=unitig19_31	GH76	ADH_N/ADH_zinc_N	Alcohol dehydrogenase GroES-like domain. This is the catalytic domain of alcohol dehydrogenases. Many of them contain an inserted zinc binding domain. This domain has a GroES-like structure./Zinc-binding dehydrogenase.
gene_ID=unitig19_33	GH109	GFO_IDH_MocA	Oxidoreductase family, NAD-binding Rossmann fold. This family of enzymes utilise NADP or NAD. This family is called the GFO/IDH/MOCA family in swiss-prot.
gene_ID=unitig19_41	CE11	SNF2_N/Helicase_C/Bromodomain	SNF2 family N-terminal domain. This domain is found in proteins involved in a variety of processes including transcription regulation (e.g., SNF2, STH1, brahma, MOT1), DNA repair (e.g. ERCC6, RAD16, RAD5), DNA recombination (e.g. RAD54), and chromatin unwinding (e.g. ISWI) as well as a variety of other proteins with little functional information (e.g. lodestar, ETL1)./Helicase conserved C-termina…
gene_ID=unitig19_42	GT48	AA_permease_2/AA_permease	Amino acid permease. /Amino acid permease.
gene_ID=unitig19_46	GT31	Adaptin_N/Cnd1	Adaptin N terminal region. This family consists of the N terminal region of various alpha, beta and gamma subunits of the AP-1, AP-2 and AP-3 adaptor protein complexes. The adaptor protein (AP) complexes are involved in the formation of clathrin-coated pits and vesicles. The N-terminal region of the various adaptor proteins (APs) is constant by comparison to the C-terminal which is variable withi…
gene_ID=unitig19_49	GT32	Gly_transf_sug	Glycosyltransferase sugar-binding region containing DXD motif. The DXD motif is a short conserved motif found in many families of glycosyltransferases, which add a range of different sugars to other sugars, phosphates and proteins. DXD-containing glycosyltransferases all use nucleoside diphosphate sugars as donors and require divalent cations, usually manganese. The DXD motif is expected to play …
gene_ID=unitig19_50	CBM51	LIP	Secretory lipase. These lipases are expressed and secreted during the infection cycle of these pathogens. In particular, C. albicans has a large number of different lipases, possibly reflecting broad lipolytic activity, which may contribute to the persistence and virulence of C. albicans in human tissue.
gene_ID=unitig19_54	CBM48	DnaJ/DnaJ_CXXCXGXG	DnaJ domain. DnaJ domains (J-domains) are associated with hsp70 heat-shock system and it is thought that this domain mediates the interaction. DnaJ-domain is therefore part of a chaperone (protein folding) system. The T-antigens, although not in Prosite are confirmed as DnaJ containing domains from literature./DnaJ central domain. The central cysteine-rich (CR) domain of DnaJ proteins contains fo…
gene_ID=unitig20_1	GT39	PMT/MIR	Dolichyl-phosphate-mannose-protein mannosyltransferase. This is a family of Dolichyl-phosphate-mannose-protein mannosyltransferase proteins EC:2.4.1.109. These proteins are responsible for O-linked glycosylation of proteins, they catalyze the reaction:- Dolichyl phosphate D-mannose + protein <=> dolichyl phosphate + O-D-mannosyl-protein. Also in this family is the Drosophila rotated abdomen prote…
gene_ID=unitig20_15	CE10	FMO-like/Pyr_redox_3	Flavin-binding monooxygenase-like. This family includes FMO proteins, cyclohexanone mono-oxygenase and a number of different mono-oxygenases./Pyridine nucleotide-disulphide oxidoreductase.
gene_ID=unitig23_7	GT4	Abhydrolase_6/Abhydrolase_1	Alpha/beta hydrolase family. This family contains alpha/beta hydrolase enzymes of diverse specificity./alpha/beta hydrolase fold. This catalytic domain is found in a very wide range of enzymes.
gene_ID=unitig23_8	AA1	Cu-oxidase_3/Cu-oxidase/Cu-oxidase_2	Multicopper oxidase. This entry contains many divergent copper oxidase-like domains that are not recognised by the pfam00394 model./Multicopper oxidase. Many of the proteins in this family contain multiple similar copies of this plastocyanin-like domain./Multicopper oxidase. This entry contains many divergent copper oxidase-like domains that are not recognised by the pfam00394 model.
gene_ID=unitig23_11	GH32	Ferric_reduct/FAD_binding_8/NAD_binding_6	Ferric reductase like transmembrane component. This family includes a common region in the transmembrane proteins mammalian cytochrome B-245 heavy chain (gp9-1phox), ferric reductase transmembrane component in yeast and respiratory burst oxidase from mouse-ear cress. This may be a family of flavocytochromes capable of moving electrons across the plasma membrane. The Frp1 protein from S. pombe is …	gene codes for the beta chain of cytochrome B-245 and cytochrome B-245 is missing from patients with the disease./FAD-binding domain. /Ferric reductase NAD binding domain.
gene_ID=unitig23_15	GH43	SRF-TF	SRF-type transcription factor (DNA-binding and dimerisation domain).
gene_ID=unitig23_27	GH63	Glyco_hydro_63	Mannosyl oligosaccharide glucosidase. This is a family of eukaryotic enzymes belonging to glycosyl hydrolase family 63. They catalyze the specific cleavage of the non-reducing terminal glucose residue from Glc(3)Man(9)GlcNAc(2). Mannosyl oligosaccharide glucosidase EC:3.2.1.106 is the first enzyme in the N-linked oligosaccharide processing pathway.
gene_ID=unitig23_28	CE1	Lactamase_B	Metallo-beta-lactamase superfamily.
gene_ID=unitig23_34	GT2	BCDHK_Adom3/HATPase_c	Mitochondrial branched-chain alpha-ketoacid dehydrogenase kinase. Catabolism and synthesis of leucine, isoleucine and valine are finely balanced, allowing the body to make the most of dietary input but removing excesses to prevent toxic build-up of their corresponding keto-acids. This is the butyryl-CoA dehydrogenase, subunit A domain 3, a largely alpha-helical bundle of the enzyme BCDHK. This en…
gene_ID=unitig23_40	GH37	Trehalase_Ca-bi/Trehalase/polyprenyl_synt	Neutral trehalase Ca2+ binding domain. Neutral trehalases mobilise trehalose accumulated by fungal cells as a protective and storage carbohydrate. This family represents a calcium-binding domain similar to EF hand. Residues 97 and 108 in S. pombe neutral trehalase have been implicated in this interaction. It is thought that this domain may provide a _	general mechanism for regulating neutral trehalase activity in yeasts and filamentous fungi./Trehalase. Trehalase (EC:3.2.1.28) is known to recycle trehalose to glucose. Trehalose is a physiological hallmark of heat-shock response in yeast and protects of proteins and membranes against a variety of stresses. This family is found in conjunction with pfam07492 in fungi./Polyprenyl synthetase.
gene_ID=unitig23_81	GT22	Glyco_transf_22	Alg9-like mannosyltransferase family. Members of this family are mannosyltransferase enzymes. At least some members are localised in endoplasmic reticulum and involved in GPI anchor biosynthesis.
gene_ID=unitig23_87	CBM6	Phosphodiest	Type I phosphodiesterase / nucleotide pyrophosphatase. This family consists of phosphodiesterases, including human plasma-cell membrane glycoprotein PC-1 / alkaline phosphodiesterase i / nucleotide pyrophosphatase (nppase). These enzymes catalyze the cleavage of phosphodiester and phosphosulfate bonds in NAD, deoxynucleotides and nucleotide sugars. Also in this family is ATX an autotaxin, tumour …
gene_ID=unitig23_97	CE11	DEAD/Helicase_C/DUF4217	DEAD/DEAH box helicase. Members of this family include the DEAD and DEAH box helicases. Helicases are involved in unwinding nucleic acids. The DEAD box helicases are involved in various aspects of RNA metabolism, including nuclear transcription, pre mRNA splicing, ribosome bio_	genesis, nucleocytoplasmic transport, translation, RNA decay and organellar _	gene expression./Helicase conserved C-terminal domain. The Prosite family is restricted to DEAD/H helicases, whereas this domain family is found in a wide variety of helicases and helicase related proteins. It may be that this is not an autonomously folding unit, but an integral part of the helicase./Domain of unknown function (DUF4217). This short domain is found at the C-terminus of many helica…
gene_ID=unitig23_115	CE11	DEAD/Helicase_C/DUF4217	DEAD/DEAH box helicase. Members of this family include the DEAD and DEAH box helicases. Helicases are involved in unwinding nucleic acids. The DEAD box helicases are involved in various aspects of RNA metabolism, including nuclear transcription, pre mRNA splicing, ribosome bio_	genesis, nucleocytoplasmic transport, translation, RNA decay and organellar _	gene expression./Helicase conserved C-terminal domain. The Prosite family is restricted to DEAD/H helicases, whereas this domain family is found in a wide variety of helicases and helicase related proteins. It may be that this is not an autonomously folding unit, but an integral part of the helicase./Domain of unknown function (DUF4217). This short domain is found at the C-terminus of many helica…
gene_ID=unitig23_117	CBM50	Y_phosphatase3	Tyrosine phosphatase family. This family is closely related to the pfam00102 and pfam00782 families.
gene_ID=unitig23_120	GH81	Glyco_hydro_81	Glycosyl hydrolase family 81. Family of eukaryotic beta-1,3-glucanases. Within the Aspergillus fumigatus protein two perfectly conserved Glu residues (E550 or E554) have been proposed as putative nucleophiles of the active site of the Engl1 endoglucanase, while the proton donor would be D475. The endo-beta-1,3-glucanase activity is essential for efficient spore release.
gene_ID=unitig23_121_partial	GH81	Glyco_hydro_81	Glycosyl hydrolase family 81. Family of eukaryotic beta-1,3-glucanases. Within the Aspergillus fumigatus protein two perfectly conserved Glu residues (E550 or E554) have been proposed as putative nucleophiles of the active site of the Engl1 endoglucanase, while the proton donor would be D475. The endo-beta-1,3-glucanase activity is essential for efficient spore release.
gene_ID=unitig24_4	CBM48	DnaJ	DnaJ domain. DnaJ domains (J-domains) are associated with hsp70 heat-shock system and it is thought that this domain mediates the interaction. DnaJ-domain is therefore part of a chaperone (protein folding) system. The T-antigens, although not in Prosite are confirmed as DnaJ containing domains from literature.
gene_ID=unitig24_8	GT4	ABC_tran/ABC2_membrane/PDR_CDR/ABC2_membrane	ABC transporter. ABC transporters for a large family of proteins responsible for translocation of a variety of compounds across biological membranes. ABC transporters are the largest family of proteins in many completely sequenced bacteria. ABC transporters are composed of two copies of this domain and two copies of a transmembrane domain pfam00664. These four domains may belong to a single polyp…
gene_ID=unitig24_17	GH35	PRP1_N	PRP1 splicing factor, N-terminal. This domain is specific to the N-terminal part of the prp1 splicing factor, which is involved in mRNA splicing (and possibly also poly(A)+ RNA nuclear export and cell cycle progression). This domain is specific to the N terminus of the RNA splicing factor encoded by prp1. It is involved in mRNA splicing and possibly also poly(A)and RNA nuclear export and cell cyc…
gene_ID=unitig24_18	GH23	MAD	Mitotic checkpoint protein. This family consists of several eukaryotic mitotic checkpoint (Mitotic arrest deficient or MAD) proteins. The mitotic spindle checkpoint monitors proper attachment of the bipolar spindle to the kinetochores of aligned sister chromatids and causes a cell cycle arrest in prometaphase when failures occur. Multiple components of the mitotic spindle checkpoint have been ide…
gene_ID=unitig26_3	CBM13	HSP70	Hsp70 protein. Hsp70 chaperones help to fold many proteins. Hsp70 assisted folding involves repeated cycles of substrate binding and release. Hsp70 activity is ATP dependent. Hsp70 proteins are made up of two regions: the amino terminus is the ATPase domain and the carboxyl terminus is the substrate binding region.
gene_ID=unitig26_4	GH18	Na_Ca_ex	Sodium/calcium exchanger protein. This is a family of sodium/calcium exchanger integral membrane proteins. This family covers the integral membrane regions of the proteins. Sodium/calcium exchangers regulate intracellular Ca2+ concentrations in many cells; cardiac myocytes, epithelial cells, neurons retinal rod photoreceptors and smooth muscle cells. Ca2+ is moved into or out of the cytosol depen…
gene_ID=unitig26_8	GH23	MAD	Mitotic checkpoint protein. This family consists of several eukaryotic mitotic checkpoint (Mitotic arrest deficient or MAD) proteins. The mitotic spindle checkpoint monitors proper attachment of the bipolar spindle to the kinetochores of aligned sister chromatids and causes a cell cycle arrest in prometaphase when failures occur. Multiple components of the mitotic spindle checkpoint have been ide…
gene_ID=unitig30_1	GT48	MFS_1	Major Facilitator Superfamily.
gene_ID=unitig30_3	GT20	PA14_2	GLEYA domain. This presumed domain is found in fungal adhesins and is related to the PA14 domain.
gene_ID=unitig30_22	GT48	AA_permease_2/AA_permease	Amino acid permease. /Amino acid permease.
gene_ID=unitig30_27	GH72	MMR_HSR1	50S ribosome-binding GTPase. The full-length GTPase protein is required for the complete activity of the protein of interacting with the 50S ribosome and binding of both adenine and guanine nucleotides, with a preference for guanine nucleotide.
gene_ID=unitig30_32	GT4	Abhydrolase_1	alpha/beta hydrolase fold. This catalytic domain is found in a very wide range of enzymes.
gene_ID=unitig30_36	GH65	E-1E2_ATPase/Hydrolase	E-1E2 ATPase. /haloacid dehalogenase-like hydrolase. This family is structurally different from the alpha/beta hydrolase family (pfam00561). This family includes L-2-haloacid dehalogenase, epoxide hydrolases and phosphatases. The structure of the family consists of two domains. One is an inserted four helix bundle, which is the least well conserved region of the alignment, between residues 16 and…
gene_ID=unitig30_40	GT4	Hydrolase_4/Abhydrolase_6/Abhydrolase_5/Abhydrolase_1/HTH_Tnp_Tc5/DDE_1	Putative lysophospholipase. This domain is found in bacteria and eukaryotes and is approximately 110 amino acids in length. It is found in association with pfam00561. Many members are annotated as being lysophospholipases, and others as alpha-beta hydrolase fold-containing proteins./Alpha/beta hydrolase family. This family contains alpha/beta hydrolase enzymes of diverse specificity./Alpha/beta h…
gene_ID=unitig30_45	GT34	p450	Cytochrome P450. Cytochrome P450s are haem-thiolate proteins involved in the oxidative degradation of various compounds. They are particularly well known for their role in the degradation of environmental toxins and mutagens. They can be divided into 4 classes, according to the method by which electrons from NAD(P)H are delivered to the catalytic site. Sequence conservation is relatively low with…	general topography and structural fold are highly conserved. The conserved core is composed of a coil termed the 'meander', a four-helix bundle, helices J and K, and two sets of beta-sheets. These constitute the haem-binding loop (with an absolutely conserved cysteine that serves as the 5th ligand for the haem iron), the proton-transfer groove and the absolutely conserved EXXR motif in helix K. W…	general enzymatic function is to catalyze regiospecific and stereospecific oxidation of non-activated hydrocarbons at physiological temperatures.
gene_ID=unitig30_67	GT1	GRAM	GRAM domain. The GRAM domain is found in in glucosyltransferases, myotubularins and other putative membrane-associated proteins.
gene_ID=unitig30_80	CBM13	HSP70	Hsp70 protein. Hsp70 chaperones help to fold many proteins. Hsp70 assisted folding involves repeated cycles of substrate binding and release. Hsp70 activity is ATP dependent. Hsp70 proteins are made up of two regions: the amino terminus is the ATPase domain and the carboxyl terminus is the substrate binding region.
gene_ID=unitig30_90	GT55	Ank_2/Ank_5/Ank_4	Ankyrin repeats (3 copies). /Ankyrin repeats (many copies). /Ankyrin repeats (many copies).
gene_ID=unitig30_94	GH76	RRM_1/RRM_1/ADH_N/ADH_zinc_N/ADH_zinc_N_2	RNA recognition motif. (a.k.a. RRM, RBD, or RNP domain). The RRM motif is probably diagnostic of an RNA binding protein. RRMs are found in a variety of RNA binding proteins, including various hnRNP proteins, proteins implicated in regulation of alternative splicing, and protein components of snRNPs. The motif also appears in a few single stranded DNA binding proteins. The RRM structure consists o…
gene_ID=unitig30_98	GT48	MFS_1/Sugar_tr	Major Facilitator Superfamily. /Sugar (and other) transporter.
gene_ID=unitig30_108	CBM12	Dioxygenase_C	Dioxygenase.
gene_ID=unitig30_110	CE14	Flavin_Reduct	Flavin reductase like domain. This is a flavin reductase family consisting of enzymes known to be flavin reductases as well as various oxidoreductase and monooxygenase components. VlmR is a flavin reductase that functions in a two-component enzyme system to provide isobutylamine N-hydroxylase with reduced flavin and may be involved in the synthesis of valanimycin. SnaC is a flavin reductase that …
gene_ID=unitig30_113	AA4/AA7	UPF0029/FAD_binding_4/FAD-oxidase_C	Uncharacterized protein family UPF0029. /FAD binding domain. This family consists of various enzymes that use FAD as a co-factor, most of the enzymes are similar to oxygen oxidoreductase. One of the enzymes Vanillyl-alcohol oxidase (VAO) has a solved structure, the alignment includes the FAD binding site, called the PP-loop, between residues 99-110. The FAD molecule is covalently bound in the kno…
gene_ID=unitig30_121	GH76	ADH_N/ADH_zinc_N	Alcohol dehydrogenase GroES-like domain. This is the catalytic domain of alcohol dehydrogenases. Many of them contain an inserted zinc binding domain. This domain has a GroES-like structure./Zinc-binding dehydrogenase.
gene_ID=unitig30_124	GH31	COX6B	Cytochrome oxidase c subunit VIb. Cytochrome c oxidase, a 13 sub-unit complex, EC:1.9.3.1 is the terminal oxidase in the mitochondrial electron transport chain. This family is composed of the potentially heme-binding subunit IVb of the oxidase.
gene_ID=unitig30_128	GH76	ADH_N/ADH_zinc_N	Alcohol dehydrogenase GroES-like domain. This is the catalytic domain of alcohol dehydrogenases. Many of them contain an inserted zinc binding domain. This domain has a GroES-like structure./Zinc-binding dehydrogenase.
gene_ID=unitig30_137	GH2	DS	Deoxyhypusine synthase. Eukaryotic initiation factor 5A (eIF-5A) contains an unusual amino acid, hypusine [N epsilon-(4-aminobutyl-2-hydroxy)lysine]. The first step in the post-translational formation of hypusine is catalyzed by the enzyme deoxyhypusine synthase (DS) EC:1.1.1.249. The modified version of eIF-5A, and DS, are required for eukaryotic cell proliferation.
gene_ID=unitig30_141	GT2/GT4	Cnd3/CMAS/Methyltransf_31/Methyltransf_18/Methyltransf_11/Methyltransf_12/Sterol_MT_C	Nuclear condensing complex subunits, C-term domain. The Cnd-13 proteins are the three non-SMC (structural maintenance of chromosomes) proteins that go to make up the mitotic condensation complex along with the two SMC protein families, XCAP-C and XCAP-E, (or in the case of fission yeast, Cut3 and Cut14). The five-member complex seems to be conserved from yeasts to vertebrates. This domain is the …
gene_ID=unitig30_142	GH76	Glyco_hydro_76	Glycosyl hydrolase family 76. Family of alpha-1,6-mannanases.
gene_ID=unitig30_150	GT41	Acetyltransf_1	Acetyltransferase (GNAT) family. This family contains proteins with N-acetyltransferase functions such as Elp3-related proteins.
gene_ID=unitig30_157	GT9	CTP_transf_2	Cytidylyltransferase. This family includes: Cholinephosphate cytidylyltransferase. Glycerol-3-phosphate cytidylyltransferase.
gene_ID=unitig30_159	GH103	Aldose_epim	Aldose -1epimerase.
gene_ID=unitig30_164	GT34	p450	Cytochrome P450. Cytochrome P450s are haem-thiolate proteins involved in the oxidative degradation of various compounds. They are particularly well known for their role in the degradation of environmental toxins and mutagens. They can be divided into 4 classes, according to the method by which electrons from NAD(P)H are delivered to the catalytic site. Sequence conservation is relatively low with…	general topography and structural fold are highly conserved. The conserved core is composed of a coil termed the 'meander', a four-helix bundle, helices J and K, and two sets of beta-sheets. These constitute the haem-binding loop (with an absolutely conserved cysteine that serves as the 5th ligand for the haem iron), the proton-transfer groove and the absolutely conserved EXXR motif in helix K. W…	general enzymatic function is to catalyze regiospecific and stereospecific oxidation of non-activated hydrocarbons at physiological temperatures.
gene_ID=unitig30_181	GT31	Adaptin_N/Alpha_adaptinC2	Adaptin N terminal region. This family consists of the N terminal region of various alpha, beta and gamma subunits of the AP-1, AP-2 and AP-3 adaptor protein complexes. The adaptor protein (AP) complexes are involved in the formation of clathrin-coated pits and vesicles. The N-terminal region of the various adaptor proteins (APs) is constant by comparison to the C-terminal which is variable withi…
gene_ID=unitig30_182	GT66	Pro_isomerase	Cyclophilin type peptidyl-prolyl cis-trans isomerase/CLD. The peptidyl-prolyl cis-trans isomerases, also known as cyclophilins, share this domain of about 109 amino acids. Cyclophilins have been found in all organisms studied so far and catalyze peptidyl-prolyl isomerisation during which the peptide bond preceding proline (the peptidyl-prolyl bond) is stabilised in the cis conformation. Mammalian…
gene_ID=unitig30_195	GH130	FAD_binding_6/NAD_binding_1	Oxidoreductase FAD-binding domain. /Oxidoreductase NAD-binding domain. Xanthine dehydrogenases, that also bind FAD/NAD, have essentially no similarity.
gene_ID=unitig30_202	GT71	Mannosyl_trans3	Mannosyltransferase putative. This family is conserved in fungi. Several members are annotated as being alpha-1,3-mannosyltransferase but this could not be confirmed.
gene_ID=unitig30_203	GT71	Mannosyl_trans3	Mannosyltransferase putative. This family is conserved in fungi. Several members are annotated as being alpha-1,3-mannosyltransferase but this could not be confirmed.
gene_ID=unitig30_204	GT31	Adaptin_N/Gamma-COP	Adaptin N terminal region. This family consists of the N terminal region of various alpha, beta and gamma subunits of the AP-1, AP-2 and AP-3 adaptor protein complexes. The adaptor protein (AP) complexes are involved in the formation of clathrin-coated pits and vesicles. The N-terminal region of the various adaptor proteins (APs) is constant by comparison to the C-terminal which is variable withi…
gene_ID=unitig30_208	GH72	MMR_HSR1/YchF-GTPase_C	50S ribosome-binding GTPase. The full-length GTPase protein is required for the complete activity of the protein of interacting with the 50S ribosome and binding of both adenine and guanine nucleotides, with a preference for guanine nucleotide./Protein of unknown function (DUF933). This domain is found at the C terminus of the YchF GTP-binding protein and is possibly related to the ubiquitin-like…
gene_ID=unitig30_214	GH28	Zn_clus/Fungal_trans	Fungal Zn(2)-Cys(6) binuclear cluster domain. /Fungal specific transcription factor domain.
gene_ID=unitig30_237	CBM48	DnaJ/DnaJ_C	DnaJ domain. DnaJ domains (J-domains) are associated with hsp70 heat-shock system and it is thought that this domain mediates the interaction. DnaJ-domain is therefore part of a chaperone (protein folding) system. The T-antigens, although not in Prosite are confirmed as DnaJ containing domains from literature./DnaJ C terminal domain. This family consists of the C terminal region form the DnaJ pro…
gene_ID=unitig30_241	GT2	6PF2K/His_Phos_1	6-phosphofructo-2-kinase. This enzyme occurs as a bifunctional enzyme with fructose-2,6-bisphosphatase. The bifunctional enzyme catalyzes both the synthesis and degradation of fructose-2,6-bisphosphate, a potent regulator of glycolysis. This enzyme contains a P-loop motif./Histidine phosphatase superfamily (branch 1). The histidine phosphatase superfamily is so named because catalysis centres on …
gene_ID=unitig30_245	CE11	DEAD/DSHCT	DEAD/DEAH box helicase. Members of this family include the DEAD and DEAH box helicases. Helicases are involved in unwinding nucleic acids. The DEAD box helicases are involved in various aspects of RNA metabolism, including nuclear transcription, pre mRNA splicing, ribosome bio_	genesis, nucleocytoplasmic transport, translation, RNA decay and organellar _	gene expression./DSHCT (NUC185) domain. This C terminal domain is found in DOB1/SK12/helY-like DEAD box helicases.
gene_ID=unitig30_250	GT87	NUDIX	NUDIX domain.
gene_ID=unitig30_253	CBM13	HSP70	Hsp70 protein. Hsp70 chaperones help to fold many proteins. Hsp70 assisted folding involves repeated cycles of substrate binding and release. Hsp70 activity is ATP dependent. Hsp70 proteins are made up of two regions: the amino terminus is the ATPase domain and the carboxyl terminus is the substrate binding region.
gene_ID=unitig30_275	GT48	MFS_1	Major Facilitator Superfamily.
gene_ID=unitig30_291	GT48	Sugar_tr/MFS_1	Sugar (and other) transporter. /Major Facilitator Superfamily.
gene_ID=unitig30_296	GH32	Ferric_reduct/FAD_binding_8/NAD_binding_6	Ferric reductase like transmembrane component. This family includes a common region in the transmembrane proteins mammalian cytochrome B-245 heavy chain (gp9-1phox), ferric reductase transmembrane component in yeast and respiratory burst oxidase from mouse-ear cress. This may be a family of flavocytochromes capable of moving electrons across the plasma membrane. The Frp1 protein from S. pombe is …	gene codes for the beta chain of cytochrome B-245 and cytochrome B-245 is missing from patients with the disease./FAD-binding domain. /Ferric reductase NAD binding domain.
gene_ID=unitig30_306	GH18	tRNA-synt_1/tRNA-synt_1g/tRNA-synt_1_2	tRNA synthetases class I (I, L, M and V). Other tRNA synthetase sub-families are too dissimilar to be included./tRNA synthetases class I (M). This family includes methionyl tRNA synthetases./Leucyl-tRNA synthetase, Domain 2. This is a family of the conserved region of Leucine-tRNA ligase or Leucyl-tRNA synthetase, EC:6.1.1.4.
gene_ID=unitig30_309	GH32	Ferric_reduct	Ferric reductase like transmembrane component. This family includes a common region in the transmembrane proteins mammalian cytochrome B-245 heavy chain (gp9-1phox), ferric reductase transmembrane component in yeast and respiratory burst oxidase from mouse-ear cress. This may be a family of flavocytochromes capable of moving electrons across the plasma membrane. The Frp1 protein from S. pombe is …	gene codes for the beta chain of cytochrome B-245 and cytochrome B-245 is missing from patients with the disease.
gene_ID=unitig30_312	GH72	MMR_HSR1/MMR_HSR1_C	50S ribosome-binding GTPase. The full-length GTPase protein is required for the complete activity of the protein of interacting with the 50S ribosome and binding of both adenine and guanine nucleotides, with a preference for guanine nucleotide./GTPase of unknown function C-terminal. This domain is found at the C-terminus of pfam01926 in archaeal and eukaryotic GTP-binding proteins. The C-terminal…
gene_ID=unitig30_325	GT48	MFS_1	Major Facilitator Superfamily.
gene_ID=unitig30_360	GH18	AhpC-TSA/Redoxin	AhpC/TSA family. This family contains proteins related to alkyl hydroperoxide reductase (AhpC) and thiol specific antioxidant (TSA)./Redoxin. This family of redoxins includes peroxiredoxin, thioredoxin and glutaredoxin proteins.
gene_ID=unitig30_371	GH28	Zn_clus	Fungal Zn(2)-Cys(6) binuclear cluster domain.
gene_ID=unitig30_414	GH65	Pribosyltran_N/Pribosyltran/HAD_2/Hydrolase	N-terminal domain of ribose phosphate pyrophosphokinase. This family is frequently found N-terminal to the Pribosyltran, pfam00156./Phosphoribosyl transferase domain. This family includes a range of diverse phosphoribosyl transferase enzymes. This family includes: Adenine phosphoribosyltransferase EC:2.4.2.7. Hypoxanthine-guanine-xanthine phosphoribosyltransferase. Hypoxanthine phosphoribosyltran…
gene_ID=unitig30_426	GH18	tRNA-synt_1/tRNA-synt_1g/Anticodon_1	tRNA synthetases class I (I, L, M and V). Other tRNA synthetase sub-families are too dissimilar to be included./tRNA synthetases class I (M). This family includes methionyl tRNA synthetases./Anticodon-binding domain of tRNA. This domain is found mainly hydrophobic tRNA synthetases. The domain binds to the anticodon of the tRNA.
gene_ID=unitig30_445	CE11	DEAD	DEAD/DEAH box helicase. Members of this family include the DEAD and DEAH box helicases. Helicases are involved in unwinding nucleic acids. The DEAD box helicases are involved in various aspects of RNA metabolism, including nuclear transcription, pre mRNA splicing, ribosome bio_	genesis, nucleocytoplasmic transport, translation, RNA decay and organellar _	gene expression.
gene_ID=unitig30_464	GH92	adh_short/adh_short_C2	short chain dehydrogenase. This family contains a wide variety of dehydrogenases./Enoyl-(Acyl carrier protein) reductase.
gene_ID=unitig30_492	GT58	Gaa1/Gaa1	Gaa-1like, GPI transamidase component. GPI (glycosyl phosphatidyl inositol) transamidase is a multi-protein complex. Gpi16, Gpi8 and Gaa1 for a sub-complex of the GPI transamidase. GPI transamidase that adds glycosylphosphatidylinositols (GPIs) to newly synthesised proteins./Gaa-1like, GPI transamidase component. GPI (glycosyl phosphatidyl inositol) transamidase is a multi-protein complex. Gpi16,…
gene_ID=unitig30_510	GH130	DUF377	Domain of unknown function (DUF377). This family contains many hypothetical proteins, some of which are predicted to be glycosyl hydrolases. This family was noted to belong to the Beta fructosidase superfamily in.
gene_ID=unitig30_513	GT20	Glyco_transf_20	Glycosyltransferase family 20. Members of this family belong to glycosyl transferase family 20. OtsA (Trehalose-6-phosphate synthase) is homologous to regions in the subunits of yeast trehalose-6-phosphate synthase/phosphate complex.
gene_ID=unitig30_528	GT48	RVT_1	Reverse transcriptase (RNA-dependent DNA polymerase). A reverse transcriptase _	gene is usually indicative of a mobile element such as a retrotransposon or retrovirus. Reverse transcriptases occur in a variety of mobile elements, including retrotransposons, retroviruses, group II introns, bacterial msDNAs, hepadnaviruses, and caulimoviruses.
gene_ID=unitig30_533	GT1	DAGAT	Diacylglycerol acyltransferase. The terminal step of triacylglycerol (TAG) formation is catalyzed by the enzyme diacylglycerol acyltransferase (DAGAT).
gene_ID=unitig30_542	GT48	AA_permease/AA_permease_2	Amino acid permease. /Amino acid permease.
gene_ID=unitig30_543	GT48	RVT_1	Reverse transcriptase (RNA-dependent DNA polymerase). A reverse transcriptase _	gene is usually indicative of a mobile element such as a retrotransposon or retrovirus. Reverse transcriptases occur in a variety of mobile elements, including retrotransposons, retroviruses, group II introns, bacterial msDNAs, hepadnaviruses, and caulimoviruses.
gene_ID=unitig30_544	GT48	AA_permease/AA_permease_2	Amino acid permease. /Amino acid permease.
gene_ID=unitig30_548	GT71	Mannosyl_trans3	Mannosyltransferase putative. This family is conserved in fungi. Several members are annotated as being alpha-1,3-mannosyltransferase but this could not be confirmed.
gene_ID=unitig30_549	CE1	Prenyltrans_2/Prenyltrans_2	Prenyltransferase-like. /Prenyltransferase-like.
gene_ID=unitig30_550	GH5	DNA_pol_E_B	DNA polymerase alpha/epsilon subunit B. This family contains a number of DNA polymerase subunits. The B subunit of the DNA polymerase alpha plays an essential role at the initial stage of DNA replication in S. cerevisiae and is phosphorylated in a cell cycle-dependent manner. DNA polymerase epsilon is essential for cell viability and chromosomal DNA replication in budding yeast. In addition, DNA …
gene_ID=unitig30_552	GH3	Glyco_hydro_3_C/Fn3-like	Glycosyl hydrolase family 3 C-terminal domain. This domain is involved in catalysis and may be involved in binding beta-glucan. This domain is found associated with pfam00933./Fibronectin type III-like domain. This domain has a fibronectin type III-like structure. It is often found in association with pfam00933 and pfam01915. Its function is unknown.
gene_ID=unitig30_553	GH3	Glyco_hydro_3	Glycosyl hydrolase family 3 N terminal domain.
gene_ID=unitig30_563	CE10	DPPIV_N/Peptidase_S9	Dipeptidyl peptidase IV (DPP IV) N-terminal region. This family is an alignment of the region to the N-terminal side of the active site. The Prosite motif does not correspond to this Pfam entry./Prolyl oligopeptidase family.
gene_ID=unitig30_564	GT2	HATPase_c/Response_reg	Histidine kinase-, DNA gyrase B-, and HSP90-like ATPase. This family represents the structurally related ATPase domains of histidine kinase, DNA gyrase B and HSP90./Response regulator receiver domain. This domain receives the signal from the sensor partner in bacterial two-component systems. It is usually found N-terminal to a DNA binding effector domain.
gene_ID=unitig30_566	GT25	UAA/TPT	UAA transporter family. This family includes transporters with a specificity for UDP-N-acetylglucosamine./Triose-phosphate Transporter family. This family includes transporters with a specificity for triose phosphate.
gene_ID=unitig30_575	GT66	Pro_isomerase	Cyclophilin type peptidyl-prolyl cis-trans isomerase/CLD. The peptidyl-prolyl cis-trans isomerases, also known as cyclophilins, share this domain of about 109 amino acids. Cyclophilins have been found in all organisms studied so far and catalyze peptidyl-prolyl isomerisation during which the peptide bond preceding proline (the peptidyl-prolyl bond) is stabilised in the cis conformation. Mammalian…
gene_ID=unitig30_592	CE11	DEAD/Helicase_C	DEAD/DEAH box helicase. Members of this family include the DEAD and DEAH box helicases. Helicases are involved in unwinding nucleic acids. The DEAD box helicases are involved in various aspects of RNA metabolism, including nuclear transcription, pre mRNA splicing, ribosome bio_	genesis, nucleocytoplasmic transport, translation, RNA decay and organellar _	gene expression./Helicase conserved C-terminal domain. The Prosite family is restricted to DEAD/H helicases, whereas this domain family is found in a wide variety of helicases and helicase related proteins. It may be that this is not an autonomously folding unit, but an integral part of the helicase.
gene_ID=unitig30_593	GT32	Gly_transf_sug	Glycosyltransferase sugar-binding region containing DXD motif. The DXD motif is a short conserved motif found in many families of glycosyltransferases, which add a range of different sugars to other sugars, phosphates and proteins. DXD-containing glycosyltransferases all use nucleoside diphosphate sugars as donors and require divalent cations, usually manganese. The DXD motif is expected to play …
gene_ID=unitig30_605	GT2	Aminotran_3	Aminotransferase class-III.
gene_ID=unitig30_616	GT2	Glycos_transf_2	Glycosyl transferase family 2. Diverse family, transferring sugar from UDP-glucose, UDP-N-acetyl- galactosamine, GDP-mannose or CDP-abequose, to a range of substrates including cellulose, dolichol phosphate and teichoic acids.
gene_ID=unitig30_617	GT71	Mannosyl_trans3	Mannosyltransferase putative. This family is conserved in fungi. Several members are annotated as being alpha-1,3-mannosyltransferase but this could not be confirmed.
gene_ID=unitig30_618	AA3	Pyr_redox_2/Pyr_redox/Pyr_redox_dim	Pyridine nucleotide-disulphide oxidoreductase. This family includes both class I and class II oxidoreductases and also NADH oxidases and peroxidases. This domain is actually a small NADH binding domain within a larger FAD binding domain./Pyridine nucleotide-disulphide oxidoreductase. This family includes both class I and class II oxidoreductases and also NADH oxidases and peroxidases. This domain…
gene_ID=unitig30_629	GT48	FKS1_dom1/Glucan_synthase	1,3-beta-glucan synthase subunit FKS1, domain-1. The FKS1_dom1 domain is likely to be the 'Class I' region just N-terminal to the first set of transmembrane helices that is involved in 1,3-beta-glucan synthesis itself. This family is found on proteins with family Glucan_synthase, pfam02364./1,3-beta-glucan synthase component. This family consists of various 1,3-beta-glucan synthase components inc…
gene_ID=unitig30_630	GT34	Glyco_transf_34	galactosyl transferase GMA12/MNN10 family. This family contains a number of glycosyltransferase enzymes that contain a DXD motif. This family includes a number of C. elegans homologues where the DXD is replaced by DXH. Some members of this family are included in glycosyltransferase family 34.
gene_ID=unitig30_635	GH72/CBM43	Glyco_hydro_72/X8	Glucanosyltransferase. This is a family of glycosylphosphatidylinositol-anchored beta(-13)glucanosyltransferases. The active site residues in the Aspergillus fumigatus example are the two glutamate residues at 160 and 261./X8 domain. The X8 domain domain contains at least 6 conserved cysteine residues that presumably form three disulphide bridges. The domain is found in an Olive pollen allergen a…
gene_ID=unitig30_638	GT2	6PF2K/His_Phos_1/Gon7	6-phosphofructo-2-kinase. This enzyme occurs as a bifunctional enzyme with fructose-2,6-bisphosphatase. The bifunctional enzyme catalyzes both the synthesis and degradation of fructose-2,6-bisphosphate, a potent regulator of glycolysis. This enzyme contains a P-loop motif./Histidine phosphatase superfamily (branch 1). The histidine phosphatase superfamily is so named because catalysis centres on …
gene_ID=unitig30_642	GH92	adh_short/adh_short_C2	short chain dehydrogenase. This family contains a wide variety of dehydrogenases./Enoyl-(Acyl carrier protein) reductase.
gene_ID=unitig30_668	GT91	DUF3589	Protein of unknown function (DUF3589). This family of proteins is found in eukaryotes. Proteins in this family are typically between 541 and 717 amino acids in length. The function of this family is not known,
gene_ID=unitig30_670	GT48	AA_permease_2/AA_permease	Amino acid permease. /Amino acid permease.
gene_ID=unitig30_674	CBM48	DnaJ	DnaJ domain. DnaJ domains (J-domains) are associated with hsp70 heat-shock system and it is thought that this domain mediates the interaction. DnaJ-domain is therefore part of a chaperone (protein folding) system. The T-antigens, although not in Prosite are confirmed as DnaJ containing domains from literature.
gene_ID=unitig30_681	GT41	TPR_11/TPR_11	TPR repeat. /TPR repeat.
gene_ID=unitig30_682	GT87	NUDIX	NUDIX domain.
gene_ID=unitig30_699	GT48	MFS_1	Major Facilitator Superfamily.
gene_ID=unitig30_702	GT48	Beta_elim_lyase/MFS_1/Sugar_tr	Beta-eliminating lyase. /Major Facilitator Superfamily. /Sugar (and other) transporter.
gene_ID=unitig30_713	GT48	MFS_1	Major Facilitator Superfamily.
gene_ID=unitig30_718	GT4	Abhydrolase_6/Abhydrolase_1	Alpha/beta hydrolase family. This family contains alpha/beta hydrolase enzymes of diverse specificity./alpha/beta hydrolase fold. This catalytic domain is found in a very wide range of enzymes.
gene_ID=unitig30_722	GT48	Sugar_tr/MFS_1	Sugar (and other) transporter. /Major Facilitator Superfamily.
gene_ID=unitig30_738	GT58	ALG3	ALG3 protein. The formation of N-glycosidic linkages of glycoproteins involves the ordered assembly of the common Glc3Man9GlcNAc2 core-oligosaccharide on the lipid carrier dolichyl pyrophosphate. Whereas early mannosylation steps occur on the cytoplasmic side of the endoplasmic reticulum with GDP-Man as donor, the final reactions from Man5GlcNAc2-PP-Dol to Man9GlcNAc2-PP-Dol on the lumenal side u…	gene encodes the Dol-P-Man:Man5GlcNAc2-PP-Dol mannosyltransferase.
gene_ID=unitig30_742	GH76	CDC50/ADH_zinc_N	LEM3 (ligand-effect modulator 3) family / CDC50 family. Members of this family have been predicted to contain transmembrane helices. The family member LEM3 is a ligand-effect modulator, mutation of which increases glucocorticoid receptor activity in response to dexamethasone and also confers increased activity on other intracellular receptors including the progesterone, oestrogen and mineralocort…	genes YNR048w, YNL323w and YCR094w (CDC50) show redundancy of function and are involved in regulation of transcription via CDC39. CDC39 (also known as NOT1) is normally a negative regulator of transcription either by affecting the _	general RNA polymerase II machinery or by altering chromatin structure. One function of CDC39 is to block activation of the mating response pathway in the absence of pheromone, and mutation causes arrest in G1 by activation of the pathway. It may be that the cold-sensitive arrest in G1 noticed in CDC50 mutants may be due to inactivation of CDC39. The effects of LEM3 on glucocorticoid receptor act…
gene_ID=unitig30_747	GH65	HMA/E-1E2_ATPase/Hydrolase	Heavy-metal-associated domain. /E-1E2 ATPase. /haloacid dehalogenase-like hydrolase. This family is structurally different from the alpha/beta hydrolase family (pfam00561). This family includes L-2-haloacid dehalogenase, epoxide hydrolases and phosphatases. The structure of the family consists of two domains. One is an inserted four helix bundle, which is the least well conserved region of the al…
gene_ID=unitig30_750	GH99	Guanylate_kin	Guanylate kinase.
gene_ID=unitig30_755	CBM48	adh_short/DnaJ/DnaJ_C	short chain dehydrogenase. This family contains a wide variety of dehydrogenases./DnaJ domain. DnaJ domains (J-domains) are associated with hsp70 heat-shock system and it is thought that this domain mediates the interaction. DnaJ-domain is therefore part of a chaperone (protein folding) system. The T-antigens, although not in Prosite are confirmed as DnaJ containing domains from literature./DnaJ …
gene_ID=unitig30_771	GH72	MMR_HSR1/YchF-GTPase_C	50S ribosome-binding GTPase. The full-length GTPase protein is required for the complete activity of the protein of interacting with the 50S ribosome and binding of both adenine and guanine nucleotides, with a preference for guanine nucleotide./Protein of unknown function (DUF933). This domain is found at the C terminus of the YchF GTP-binding protein and is possibly related to the ubiquitin-like…
gene_ID=unitig30_789	AA6	ATP_bind_4/Ribonuc_L-PSP/Ribonuc_L-PSP	ATP-binding region. This family of proteins probably binds ATP. This domain is about 200 amino acids long with a strongly conserved motif SGGKD at the N terminus.In some members of this family , this domain is associated with pfam01042./Endoribonuclease L-PSP. Endoribonuclease active on single-stranded mRNA. Inhibits protein synthesis by cleavage of mRNA. Previously thought to inhibit protein syn…
gene_ID=unitig30_798	GH28	Zn_clus	Fungal Zn(2)-Cys(6) binuclear cluster domain.
gene_ID=unitig30_806	GT32	Gly_transf_sug	Glycosyltransferase sugar-binding region containing DXD motif. The DXD motif is a short conserved motif found in many families of glycosyltransferases, which add a range of different sugars to other sugars, phosphates and proteins. DXD-containing glycosyltransferases all use nucleoside diphosphate sugars as donors and require divalent cations, usually manganese. The DXD motif is expected to play …
gene_ID=unitig30_807	GT4	Acyltransferase	Acyltransferase. This family contains acyltransferases involved in phospholipid biosynthesis and other proteins of unknown function. This family also includes tafazzin, the Barth syndrome _	gene.
gene_ID=unitig30_812	GT2/CBM48	Chitin_synth_1N/Chitin_synth_1/Chitin_synth_2/RCC1	Chitin synthase N-terminal. This is the N-terminal domain of Chitin synthase (pfam01644)./Chitin synthase. This region is found commonly in chitin synthases classes I, II and III. Chitin a linear homopolymer of GlcNAc residues, it is an important component of the cell wall of fungi and is synthesised on the cytoplasmic surface of the cell membrane by membrane bound chitin synthases./Chitin syntha…
gene_ID=unitig30_813	CBM6	Phosphodiest	Type I phosphodiesterase / nucleotide pyrophosphatase. This family consists of phosphodiesterases, including human plasma-cell membrane glycoprotein PC-1 / alkaline phosphodiesterase i / nucleotide pyrophosphatase (nppase). These enzymes catalyze the cleavage of phosphodiester and phosphosulfate bonds in NAD, deoxynucleotides and nucleotide sugars. Also in this family is ATX an autotaxin, tumour …
gene_ID=unitig30_817	GH18	AhpC-TSA	AhpC/TSA family. This family contains proteins related to alkyl hydroperoxide reductase (AhpC) and thiol specific antioxidant (TSA).
gene_ID=unitig30_819	GT1	GRAM	GRAM domain. The GRAM domain is found in in glucosyltransferases, myotubularins and other putative membrane-associated proteins.
gene_ID=unitig30_837	CE11	DEAD/rRNA_proc-arch/DSHCT	DEAD/DEAH box helicase. Members of this family include the DEAD and DEAH box helicases. Helicases are involved in unwinding nucleic acids. The DEAD box helicases are involved in various aspects of RNA metabolism, including nuclear transcription, pre mRNA splicing, ribosome bio_	genesis, nucleocytoplasmic transport, translation, RNA decay and organellar _	gene expression./rRNA-processing arch domain. Mtr4 is the essential RNA helicase, and is an exosome-activating cofactor. This arch domain is carried in Mtr4 and Ski2 (the cytosolic homologue of Mtr4). The arch domain is required for proper 5.8S rRNA processing, and appears to function independently of canonical helicase activity./DSHCT (NUC185) domain. This C terminal domain is found in DOB1/SK12…
gene_ID=unitig30_850	CE11	E1_dh/DEAD/Helicase_C/Sec63/DEAD/Sec63	Dehydrogenase E1 component. This family uses thiamine pyrophosphate as a cofactor. This family includes pyruvate dehydrogenase, 2-oxoglutarate dehydrogenase and 2-oxoisovalerate dehydrogenase./DEAD/DEAH box helicase. Members of this family include the DEAD and DEAH box helicases. Helicases are involved in unwinding nucleic acids. The DEAD box helicases are involved in various aspects of RNA metab…	genesis, nucleocytoplasmic transport, translation, RNA decay and organellar _	gene expression./Helicase conserved C-terminal domain. The Prosite family is restricted to DEAD/H helicases, whereas this domain family is found in a wide variety of helicases and helicase related proteins. It may be that this is not an autonomously folding unit, but an integral part of the helicase./Sec63 Brl domain. This domain (also known as the Brl domain) is required for assembly of function…	genesis, nucleocytoplasmic transport, translation, RNA decay and organellar _	gene expression./Sec63 Brl domain. This domain (also known as the Brl domain) is required for assembly of functional endoplasmic reticulum translocons.
gene_ID=unitig30_861	GH84	Peptidase_M24	Metallopeptidase family M24. This family contains metallopeptidases. It also contains non-peptidase homologues such as the N terminal domain of Spt16 which is a histone H3-H4 binding module.
gene_ID=unitig30_862	GH13	dCMP_cyt_deam_1	Cytidine and deoxycytidylate deaminase zinc-binding region.
gene_ID=unitig30_863	GT2	His_Phos_1	Histidine phosphatase superfamily (branch 1). The histidine phosphatase superfamily is so named because catalysis centres on a conserved His residue that is transiently phosphorylated during the catalytic cycle. Other conserved residues contribute to a 'phosphate pocket' and interact with the phospho group of substrate before, during and after its transfer to the His residue. Structure and sequen…
gene_ID=unitig30_880	CE11	DEAD/Helicase_C	DEAD/DEAH box helicase. Members of this family include the DEAD and DEAH box helicases. Helicases are involved in unwinding nucleic acids. The DEAD box helicases are involved in various aspects of RNA metabolism, including nuclear transcription, pre mRNA splicing, ribosome bio_	genesis, nucleocytoplasmic transport, translation, RNA decay and organellar _	gene expression./Helicase conserved C-terminal domain. The Prosite family is restricted to DEAD/H helicases, whereas this domain family is found in a wide variety of helicases and helicase related proteins. It may be that this is not an autonomously folding unit, but an integral part of the helicase.
gene_ID=unitig30_883	GT4	ABC_tran/ABC2_membrane/PDR_CDR/ABC2_membrane	ABC transporter. ABC transporters for a large family of proteins responsible for translocation of a variety of compounds across biological membranes. ABC transporters are the largest family of proteins in many completely sequenced bacteria. ABC transporters are composed of two copies of this domain and two copies of a transmembrane domain pfam00664. These four domains may belong to a single polyp…
gene_ID=unitig30_904	GT4	Abhydrolase_6/Abhydrolase_1	Alpha/beta hydrolase family. This family contains alpha/beta hydrolase enzymes of diverse specificity./alpha/beta hydrolase fold. This catalytic domain is found in a very wide range of enzymes.
gene_ID=unitig30_913	GH43	SRF-TF	SRF-type transcription factor (DNA-binding and dimerisation domain).
gene_ID=unitig30_919	GT35	Phosphorylase	Carbohydrate phosphorylase. The members of this family catalyze the formation of glucose -1phosphate from one of the following polyglucoses; glycogen, starch, glucan or maltodextrin.
gene_ID=unitig30_923	CE11	SNF2_N/Helicase_C	SNF2 family N-terminal domain. This domain is found in proteins involved in a variety of processes including transcription regulation (e.g., SNF2, STH1, brahma, MOT1), DNA repair (e.g. ERCC6, RAD16, RAD5), DNA recombination (e.g. RAD54), and chromatin unwinding (e.g. ISWI) as well as a variety of other proteins with little functional information (e.g. lodestar, ETL1)./Helicase conserved C-termina…
gene_ID=unitig30_946	GT48	MFS_1	Major Facilitator Superfamily.
gene_ID=unitig32_10	GH92/CE4	adh_short/adh_short_C2/Peptidase_C14	short chain dehydrogenase. This family contains a wide variety of dehydrogenases./Enoyl-(Acyl carrier protein) reductase. /Caspase domain.
gene_ID=unitig32_11	CBM48	DnaJ/DUF1977	DnaJ domain. DnaJ domains (J-domains) are associated with hsp70 heat-shock system and it is thought that this domain mediates the interaction. DnaJ-domain is therefore part of a chaperone (protein folding) system. The T-antigens, although not in Prosite are confirmed as DnaJ containing domains from literature./Domain of unknown function (DUF1977). Members of this family of functionally uncharacte…
gene_ID=unitig32_13	GT2	HAMP/HisKA/HATPase_c/Response_reg	HAMP domain. /His Kinase A (phospho-acceptor) domain. Dimerisation and phospho-acceptor domain of histidine kinases./Histidine kinase-, DNA gyrase B-, and HSP90-like ATPase. This family represents the structurally related ATPase domains of histidine kinase, DNA gyrase B and HSP90./Response regulator receiver domain. This domain receives the signal from the sensor partner in bacterial two-componen…
gene_ID=unitig32_20	GT48	MFS_1	Major Facilitator Superfamily.
gene_ID=unitig32_27	CE11	DBINO/SNF2_N/Helicase_C	DNA-binding domain. DBINO is a DNA-binding domain found on global transcription activator SNF2L1 proteins and chromatin re-modelling proteins./SNF2 family N-terminal domain. This domain is found in proteins involved in a variety of processes including transcription regulation (e.g., SNF2, STH1, brahma, MOT1), DNA repair (e.g. ERCC6, RAD16, RAD5), DNA recombination (e.g. RAD54), and chromatin unwi…
gene_ID=unitig32_35	GT71	Mannosyl_trans3	Mannosyltransferase putative. This family is conserved in fungi. Several members are annotated as being alpha-1,3-mannosyltransferase but this could not be confirmed.
gene_ID=unitig32_37	GH3	Beta-lactamase	Beta-lactamase. This family appears to be distantly related to pfam00905 and PF00768 D-alanyl-D-alanine carboxypeptidase.
gene_ID=unitig32_44	GT15	Glyco_transf_15	Glycolipid 2-alpha-mannosyltransferase. This is a family of alpha-1,2 mannosyl-transferases involved in N-linked and O-linked glycosylation of proteins. Some of the enzymes in this family have been shown to be involved in O- and N-linked glycan modifications in the Golgi.
gene_ID=unitig32_56	GH72	MMR_HSR1	50S ribosome-binding GTPase. The full-length GTPase protein is required for the complete activity of the protein of interacting with the 50S ribosome and binding of both adenine and guanine nucleotides, with a preference for guanine nucleotide.
gene_ID=unitig32_57	CE10	FMO-like/FMO-like/Arf	Flavin-binding monooxygenase-like. This family includes FMO proteins, cyclohexanone mono-oxygenase and a number of different mono-oxygenases./Flavin-binding monooxygenase-like. This family includes FMO proteins, cyclohexanone mono-oxygenase and a number of different mono-oxygenases./ADP-ribosylation factor family. Pfam combines a number of different Prosite families together
gene_ID=unitig32_66	GT90	Thioredoxin/Thioredoxin_2/PITH	Thioredoxin. Thioredoxins are small enzymes that participate in redox reactions, via the reversible oxidation of an active centre disulfide bond. Some members with only the active site are not separated from the noise./Thioredoxin-like domain. /PITH domain. This family was formerly known as DUF1000. The full-length, Txnl1, protein which is a probable component of the 26S proteasome, uses its C-te…
gene_ID=unitig32_73	GT90	Thioredoxin/Glutaredoxin	Thioredoxin. Thioredoxins are small enzymes that participate in redox reactions, via the reversible oxidation of an active centre disulfide bond. Some members with only the active site are not separated from the noise./Glutaredoxin.
gene_ID=unitig32_91	GH3	DHQ_synthase/EPSP_synthase/SKI/DHquinase_I/Shikimate_dh_N/Shikimate_DH	3-dehydroquinate synthase. The 3-dehydroquinate synthase EC:4.6.1.3 domain is present in isolation in various bacterial 3-dehydroquinate synthases and also present as a domain in the pentafunctional AROM polypeptide. 3-dehydroquinate (DHQ) synthase catalyzes the formation of dehydroquinate (DHQ) and orthophosphate from 3-deoxy-D-arabino heptulosonic 7 phosphate. This reaction is part of the shiki…
gene_ID=unitig32_93	GT1	PH/ArfGap	PH domain. PH stands for pleckstrin homology./Putative GTPase activating protein for Arf. Putative zinc fingers with GTPase activating proteins (GAPs) towards the small GTPase, Arf. The GAP of ARD1 stimulates GTPase hydrolysis for ARD1 but not ARFs.
gene_ID=unitig32_111	GT48	TRI12/MFS_1/Sugar_tr	Fungal trichothecene efflux pump (TRI12). This family consists of several fungal specific trichothecene efflux pump proteins. Many of the _	genes involved in trichothecene toxin biosynthesis in Fusarium sporotrichioides are present within a _	gene cluster.It has been suggested that TRI12 may play a role in F. sporotrichioides self-protection against trichothecenes./Major Facilitator Superfamily. /Sugar (and other) transporter.
gene_ID=unitig32_113	GT48	Sugar_tr/MFS_1	Sugar (and other) transporter. /Major Facilitator Superfamily.
gene_ID=unitig32_114	GT48	Sugar_tr/MFS_1	Sugar (and other) transporter. /Major Facilitator Superfamily.
gene_ID=unitig32_117	GT48	AA_permease/AA_permease_2	Amino acid permease. /Amino acid permease.
gene_ID=unitig32_118	CBM48	AMPKBI	5'-AMP-activated protein kinase beta subunit, interation domain. This region is found in the beta subunit of the 5'-AMP-activated protein kinase complex, and its yeast homologues Sip1, Sip2 and Gal83, which are found in the SNF1 kinase complex. This region is sufficient for interaction of this subunit with the kinase complex, but is not solely responsible for the interaction, and the interaction …
gene_ID=unitig32_123	GT15	Glyco_transf_15/Glyco_transf_15	Glycolipid 2-alpha-mannosyltransferase. This is a family of alpha-1,2 mannosyl-transferases involved in N-linked and O-linked glycosylation of proteins. Some of the enzymes in this family have been shown to be involved in O- and N-linked glycan modifications in the Golgi./Glycolipid 2-alpha-mannosyltransferase. This is a family of alpha-1,2 mannosyl-transferases involved in N-linked and O-linked …
gene_ID=unitig32_124	GT15	Sds3	Sds3-like. Repression of _	gene transcription is mediated by histone deacetylases containing repressor-co-repressor complexes, which are recruited to promoters of target _	genes via interactions with sequence-specific transcription factors. The co-repressor complex contains a core of at least seven proteins. This family represents the conserved region found in Sds3, Dep1 and BRMS-1homologue p40 proteins.
gene_ID=unitig32_128	CE4	CPSase_sm_chain/GATase/CPSase_L_chain/CPSase_L_D2/CPSase_L_D3/CPSase_L_chain/ATP-grasp_4/Dala_Dala_lig_C/CPSase_L_D2/MGS/OTCace_N/OTCace	Carbamoyl-phosphate synthase small chain, CPSase domain. The carbamoyl-phosphate synthase domain is in the amino terminus of protein. Carbamoyl-phosphate synthase catalyzes the ATP-dependent synthesis of carbamyl-phosphate from glutamine or ammonia and bicarbonate. This important enzyme initiates both the urea cycle and the biosynthesis of arginine and/or pyrimidines. The carbamoyl-phosphate synt…
gene_ID=unitig32_134	GH13	Alpha-amylase	Alpha amylase, catalytic domain. Alpha amylase is classified as family 13 of the glycosyl hydrolases. The structure is an 8 stranded alpha/beta barrel containing the active site, interrupted by a ~70 a.a. calcium-binding domain protruding between beta strand 3 and alpha helix 3, and a carboxyl-terminal Greek key beta-barrel domain.
gene_ID=unitig32_139	CBM13	PI-PLC-X/PI-PLC-Y/Bystin	Phosphatidylinositol-specific phospholipase C, X domain. This associates with pfam00387 to form a single structural unit./Phosphatidylinositol-specific phospholipase C, Y domain. This associates with pfam00388 to form a single structural unit./Bystin. Trophinin and tastin form a cell adhesion molecule complex that potentially mediates an initial attachment of the blastocyst to uterine epithelial …
gene_ID=unitig32_143	GH55	LRR_8/SOG2/SOG2	Leucine rich repeat. /RAM signalling pathway protein. SOG2 proteins in Saccharomyces cerevisiae are involved in cell separation and cytokinesis./RAM signalling pathway protein. SOG2 proteins in Saccharomyces cerevisiae are involved in cell separation and cytokinesis.
gene_ID=unitig32_146	GT4	Abhydrolase_6/Abhydrolase_1	Alpha/beta hydrolase family. This family contains alpha/beta hydrolase enzymes of diverse specificity./alpha/beta hydrolase fold. This catalytic domain is found in a very wide range of enzymes.
gene_ID=unitig32_160	GT50	Cyclin_N/Cyclin_C	Cyclin, N-terminal domain. Cyclins regulate cyclin dependent kinases (CDKs). Human cyclin-O is a Uracil-DNA glycosylase that is related to other cyclins. Cyclins contain two domains of similar all-alpha fold, of which this family corresponds with the N-terminal domain./Cyclin, C-terminal domain. Cyclins regulate cyclin dependent kinases (CDKs). Human CCNO is a Uracil-DNA glycosylase that is relat…
gene_ID=unitig32_163	GH76	Glyco_hydro_76	Glycosyl hydrolase family 76. Family of alpha-1,6-mannanases.
gene_ID=unitig32_169	GT71	Mannosyl_trans3	Mannosyltransferase putative. This family is conserved in fungi. Several members are annotated as being alpha-1,3-mannosyltransferase but this could not be confirmed.
gene_ID=unitig32_178	CE9	Glucosamine_iso	Glucosamine-6-phosphate isomerases/6-phosphogluconolactonase.
gene_ID=unitig32_183	GT51	FHA/Pkinase_Tyr/Pkinase/FHA	FHA domain. The FHA (Forkhead-associated) domain is a phosphopeptide binding motif./Protein tyrosine kinase. /Protein kinase domain. /FHA domain. The FHA (Forkhead-associated) domain is a phosphopeptide binding motif.
gene_ID=unitig32_206	CE9	Glucosamine_iso	Glucosamine-6-phosphate isomerases/6-phosphogluconolactonase.
gene_ID=unitig32_222	GT2	Aminotran_3	Aminotransferase class-III.
gene_ID=unitig32_223	GT2	Aminotran_3	Aminotransferase class-III.
gene_ID=unitig32_242	GT48	MFS_1	Major Facilitator Superfamily.
gene_ID=unitig32_267	CE11	SNF2_N/Helicase_C	SNF2 family N-terminal domain. This domain is found in proteins involved in a variety of processes including transcription regulation (e.g., SNF2, STH1, brahma, MOT1), DNA repair (e.g. ERCC6, RAD16, RAD5), DNA recombination (e.g. RAD54), and chromatin unwinding (e.g. ISWI) as well as a variety of other proteins with little functional information (e.g. lodestar, ETL1)./Helicase conserved C-termina…
gene_ID=unitig32_271	GT35	Phosphorylase	Carbohydrate phosphorylase. The members of this family catalyze the formation of glucose -1phosphate from one of the following polyglucoses; glycogen, starch, glucan or maltodextrin.
gene_ID=unitig32_276	GH43	SRF-TF	SRF-type transcription factor (DNA-binding and dimerisation domain).
gene_ID=unitig32_286	GT4	Abhydrolase_6/Abhydrolase_1	Alpha/beta hydrolase family. This family contains alpha/beta hydrolase enzymes of diverse specificity./alpha/beta hydrolase fold. This catalytic domain is found in a very wide range of enzymes.
gene_ID=unitig32_309	GT4	ABC_tran/ABC2_membrane/PDR_CDR/ABC2_membrane	ABC transporter. ABC transporters for a large family of proteins responsible for translocation of a variety of compounds across biological membranes. ABC transporters are the largest family of proteins in many completely sequenced bacteria. ABC transporters are composed of two copies of this domain and two copies of a transmembrane domain pfam00664. These four domains may belong to a single polyp…
gene_ID=unitig32_312	CE11	DEAD/Helicase_C	DEAD/DEAH box helicase. Members of this family include the DEAD and DEAH box helicases. Helicases are involved in unwinding nucleic acids. The DEAD box helicases are involved in various aspects of RNA metabolism, including nuclear transcription, pre mRNA splicing, ribosome bio_	genesis, nucleocytoplasmic transport, translation, RNA decay and organellar _	gene expression./Helicase conserved C-terminal domain. The Prosite family is restricted to DEAD/H helicases, whereas this domain family is found in a wide variety of helicases and helicase related proteins. It may be that this is not an autonomously folding unit, but an integral part of the helicase.
gene_ID=unitig32_329	GT2	His_Phos_1	Histidine phosphatase superfamily (branch 1). The histidine phosphatase superfamily is so named because catalysis centres on a conserved His residue that is transiently phosphorylated during the catalytic cycle. Other conserved residues contribute to a 'phosphate pocket' and interact with the phospho group of substrate before, during and after its transfer to the His residue. Structure and sequen…
gene_ID=unitig32_330	GH13	dCMP_cyt_deam_1	Cytidine and deoxycytidylate deaminase zinc-binding region.
gene_ID=unitig32_331	GH84	Peptidase_M24	Metallopeptidase family M24. This family contains metallopeptidases. It also contains non-peptidase homologues such as the N terminal domain of Spt16 which is a histone H3-H4 binding module.
gene_ID=unitig36_2	GH103/GH1	Polysacc_synt_2/RmlD_sub_bind/Epimerase/3Beta_HSD/Epimerase_Csub/Aldose_epim	Polysaccharide biosynthesis protein. This is a family of diverse bacterial polysaccharide biosynthesis proteins including the CapD protein, WalL protein mannosyl-transferase and several putative epimerases (e.g. WbiI)./RmlD substrate binding domain. L-rhamnose is a saccharide required for the virulence of some bacteria. Its precursor, dTDP-L-rhamnose, is synthesised by four different enzymes the …
gene_ID=unitig36_9	GT48	MFS_1	Major Facilitator Superfamily.
gene_ID=unitig36_11	GT48	MFS_1	Major Facilitator Superfamily.
gene_ID=unitig36_12	GT66	Pro_isomerase	Cyclophilin type peptidyl-prolyl cis-trans isomerase/CLD. The peptidyl-prolyl cis-trans isomerases, also known as cyclophilins, share this domain of about 109 amino acids. Cyclophilins have been found in all organisms studied so far and catalyze peptidyl-prolyl isomerisation during which the peptide bond preceding proline (the peptidyl-prolyl bond) is stabilised in the cis conformation. Mammalian…
gene_ID=unitig37_2	GT48	AA_permease/AA_permease_2	Amino acid permease. /Amino acid permease.
gene_ID=unitig37_3	GH130	FAD_binding_6/NAD_binding_1/DUF946	Oxidoreductase FAD-binding domain. /Oxidoreductase NAD-binding domain. Xanthine dehydrogenases, that also bind FAD/NAD, have essentially no similarity./Plant protein of unknown function (DUF946). This family consists of several hypothetical proteins from Arabidopsis thaliana and Oryza sativa. The function of this family is unknown.
gene_ID=unitig37_4	GT60	2OG-FeII_Oxy_3/Ofd1_CTDD	2OG-Fe(II) oxygenase superfamily. This family contains members of the 2-oxoglutarate (2OG) and Fe(II)-dependent oxygenase superfamily./Oxoglutarate and iron-dependent oxygenase degradation C-term. Ofd1 is a prolyl 4-hydroxylase-like 2-oxoglutarate-Fe(II) dioxygenase that accelerates the degradation of Sre1N in the presence of oxygen. The domain is conserved from yeasts to humans. Yeast Sre1 is th…
gene_ID=unitig37_13	GH47	Glyco_hydro_47	Glycosyl hydrolase family 47. Members of this family are alpha-mannosidases that catalyze the hydrolysis of the terminal 1,2-linked alpha-D-mannose residues in the oligo-mannose oligosaccharide Man(9)(GlcNAc)(2).
gene_ID=unitig40_1_partial	GT90	Thioredoxin	Thioredoxin. Thioredoxins are small enzymes that participate in redox reactions, via the reversible oxidation of an active centre disulfide bond. Some members with only the active site are not separated from the noise.
gene_ID=unitig40_6	GT28/GT1	GRAM/Glyco_transf_28	GRAM domain. The GRAM domain is found in in glucosyltransferases, myotubularins and other putative membrane-associated proteins./Glycosyltransferase family 28 N-terminal domain. The glycosyltransferase family 28 includes monogalactosyldiacylglycerol synthase (EC 2.4.1.46) and UDP-N-acetylglucosamine transferase (EC 2.4.1.-). This N-terminal domain contains the acceptor binding site and likely mem…
gene_ID=unitig40_17	CBM48	DnaJ	DnaJ domain. DnaJ domains (J-domains) are associated with hsp70 heat-shock system and it is thought that this domain mediates the interaction. DnaJ-domain is therefore part of a chaperone (protein folding) system. The T-antigens, although not in Prosite are confirmed as DnaJ containing domains from literature.
gene_ID=unitig40_26	GT34	p450	Cytochrome P450. Cytochrome P450s are haem-thiolate proteins involved in the oxidative degradation of various compounds. They are particularly well known for their role in the degradation of environmental toxins and mutagens. They can be divided into 4 classes, according to the method by which electrons from NAD(P)H are delivered to the catalytic site. Sequence conservation is relatively low with…	general topography and structural fold are highly conserved. The conserved core is composed of a coil termed the 'meander', a four-helix bundle, helices J and K, and two sets of beta-sheets. These constitute the haem-binding loop (with an absolutely conserved cysteine that serves as the 5th ligand for the haem iron), the proton-transfer groove and the absolutely conserved EXXR motif in helix K. W…	general enzymatic function is to catalyze regiospecific and stereospecific oxidation of non-activated hydrocarbons at physiological temperatures.
gene_ID=unitig40_29	GT48	MFS_1	Major Facilitator Superfamily.
gene_ID=unitig40_42_partial	CE11	SNF2_N/Helicase_C/HAND/SLIDE	SNF2 family N-terminal domain. This domain is found in proteins involved in a variety of processes including transcription regulation (e.g., SNF2, STH1, brahma, MOT1), DNA repair (e.g. ERCC6, RAD16, RAD5), DNA recombination (e.g. RAD54), and chromatin unwinding (e.g. ISWI) as well as a variety of other proteins with little functional information (e.g. lodestar, ETL1)./Helicase conserved C-termina…
gene_ID=unitig41_1	GT48	MFS_1	Major Facilitator Superfamily.
gene_ID=unitig41_18	GT4	Ubie_methyltran/Methyltransf_31	ubiE/COQ5 methyltransferase family. /Methyltransferase domain. This family appears to be have methyltransferase activity.
gene_ID=unitig41_39	GH76	ADH_N/ADH_zinc_N	Alcohol dehydrogenase GroES-like domain. This is the catalytic domain of alcohol dehydrogenases. Many of them contain an inserted zinc binding domain. This domain has a GroES-like structure./Zinc-binding dehydrogenase.
gene_ID=unitig42_2	CE11	SNF2_N/Helicase_C/HAND/SLIDE	SNF2 family N-terminal domain. This domain is found in proteins involved in a variety of processes including transcription regulation (e.g., SNF2, STH1, brahma, MOT1), DNA repair (e.g. ERCC6, RAD16, RAD5), DNA recombination (e.g. RAD54), and chromatin unwinding (e.g. ISWI) as well as a variety of other proteins with little functional information (e.g. lodestar, ETL1)./Helicase conserved C-termina…
gene_ID=unitig42_3	AA3	Pyr_redox_2	Pyridine nucleotide-disulphide oxidoreductase. This family includes both class I and class II oxidoreductases and also NADH oxidases and peroxidases. This domain is actually a small NADH binding domain within a larger FAD binding domain.
gene_ID=unitig42_7	GT48	MFS_1	Major Facilitator Superfamily.
gene_ID=unitig42_8	GH32	PfkB	pfkB family carbohydrate kinase. This family includes a variety of carbohydrate and pyrimidine kinases.
gene_ID=unitig42_26	AA1	Cu-oxidase_3/Cu-oxidase_2	Multicopper oxidase. This entry contains many divergent copper oxidase-like domains that are not recognised by the pfam00394 model./Multicopper oxidase. This entry contains many divergent copper oxidase-like domains that are not recognised by the pfam00394 model.
gene_ID=unitig42_35	GH32	PfkB	pfkB family carbohydrate kinase. This family includes a variety of carbohydrate and pyrimidine kinases.
gene_ID=unitig42_46	GT48	MFS_1	Major Facilitator Superfamily.
gene_ID=unitig42_47	AA6/GH130	Flavodoxin_1/FAD_binding_1/NAD_binding_1	Flavodoxin. /FAD binding domain. This domain is found in sulfite reductase, NADPH cytochrome P450 reductase, Nitric oxide synthase and methionine synthase reductase./Oxidoreductase NAD-binding domain. Xanthine dehydrogenases, that also bind FAD/NAD, have essentially no similarity.
gene_ID=unitig42_51	GT9	PNK3P	Polynucleotide kinase 3 phosphatase. Polynucleotide kinase 3 phosphatases play a role in the repair of single breaks in DNA induced by DNA-damaging agents such as gamma radiation and camptothecin.
gene_ID=unitig42_54	GT66	Pro_isomerase	Cyclophilin type peptidyl-prolyl cis-trans isomerase/CLD. The peptidyl-prolyl cis-trans isomerases, also known as cyclophilins, share this domain of about 109 amino acids. Cyclophilins have been found in all organisms studied so far and catalyze peptidyl-prolyl isomerisation during which the peptide bond preceding proline (the peptidyl-prolyl bond) is stabilised in the cis conformation. Mammalian…
gene_ID=unitig43_2	GH132	SUN	Beta-glucosidase (SUN family). Members of this family include Nca3, Sun4 and Sim1. This is a family of yeast proteins, involved in a diverse set of functions (DNA replication, aging, mitochondrial bio_	genesis and cell septation). BGLA from Candida wickerhamii has been characterized as a Beta-glucosidase EC:3.2.1.21.
gene_ID=unitig43_7	CE11	SNF2_N/Helicase_C/DUF4208	SNF2 family N-terminal domain. This domain is found in proteins involved in a variety of processes including transcription regulation (e.g., SNF2, STH1, brahma, MOT1), DNA repair (e.g. ERCC6, RAD16, RAD5), DNA recombination (e.g. RAD54), and chromatin unwinding (e.g. ISWI) as well as a variety of other proteins with little functional information (e.g. lodestar, ETL1)./Helicase conserved C-termina…
gene_ID=unitig43_9	GT20	Glyco_transf_20/Trehalose_PPase	Glycosyltransferase family 20. Members of this family belong to glycosyl transferase family 20. OtsA (Trehalose-6-phosphate synthase) is homologous to regions in the subunits of yeast trehalose-6-phosphate synthase/phosphate complex./Trehalose-phosphatase. This family consist of trehalose-phosphatases EC:3.1.3.12 these enzyme catalyze the de-phosphorylation of trehalose-6-phosphate to trehalose a…	genes in the E. coli otsBA operon otsA the trehalose-6-phosphate synthase and otsB trehalose-phosphatase (this family) have undergone _	gene fusion in most eukaryotes. Trehalose is a common disaccharide of bacteria, fungi and invertebrates that appears to play a major role in desiccation tolerance.
gene_ID=unitig43_10	GT4	Abhydrolase_1	alpha/beta hydrolase fold. This catalytic domain is found in a very wide range of enzymes.
gene_ID=unitig43_14	GT48	AA_permease/AA_permease_2	Amino acid permease. /Amino acid permease.
gene_ID=unitig43_24	GH28	Zn_clus	Fungal Zn(2)-Cys(6) binuclear cluster domain.
gene_ID=unitig43_26	CE11	DEAD/Helicase_C/RQC	DEAD/DEAH box helicase. Members of this family include the DEAD and DEAH box helicases. Helicases are involved in unwinding nucleic acids. The DEAD box helicases are involved in various aspects of RNA metabolism, including nuclear transcription, pre mRNA splicing, ribosome bio_	genesis, nucleocytoplasmic transport, translation, RNA decay and organellar _	gene expression./Helicase conserved C-terminal domain. The Prosite family is restricted to DEAD/H helicases, whereas this domain family is found in a wide variety of helicases and helicase related proteins. It may be that this is not an autonomously folding unit, but an integral part of the helicase./RQC domain. This DNA-binding domain is found in the RecQ helicase among others and has a helix-tu…
gene_ID=unitig43_41	GT48	MFS_1	Major Facilitator Superfamily.
gene_ID=unitig44_10	GT30	Methyltransf_4	Putative methyltransferase. This is a family of putative methyltransferases. The aligned region contains the GXGXG S-AdoMet binding site suggesting a putative methyltransferase activity.
gene_ID=unitig45_8	GH65	Hydrolase/HAD_2	haloacid dehalogenase-like hydrolase. This family is structurally different from the alpha/beta hydrolase family (pfam00561). This family includes L-2-haloacid dehalogenase, epoxide hydrolases and phosphatases. The structure of the family consists of two domains. One is an inserted four helix bundle, which is the least well conserved region of the alignment, between residues 16 and 96 of Pseudomo…
gene_ID=unitig45_10	GT2	His_Phos_1	Histidine phosphatase superfamily (branch 1). The histidine phosphatase superfamily is so named because catalysis centres on a conserved His residue that is transiently phosphorylated during the catalytic cycle. Other conserved residues contribute to a 'phosphate pocket' and interact with the phospho group of substrate before, during and after its transfer to the His residue. Structure and sequen…
gene_ID=unitig45_23	AA6/GH130	Flavodoxin_1/FAD_binding_1/NAD_binding_1/tRNA-synt_2d/FDX-ACB	Flavodoxin. /FAD binding domain. This domain is found in sulfite reductase, NADPH cytochrome P450 reductase, Nitric oxide synthase and methionine synthase reductase./Oxidoreductase NAD-binding domain. Xanthine dehydrogenases, that also bind FAD/NAD, have essentially no similarity./tRNA synthetases class II core domain (F). Other tRNA synthetase sub-families are too dissimilar to be included. This…
gene_ID=unitig45_25	GH72	TrmE_N/MMR_HSR1/GTPase_Cys_C	GTP-binding protein TrmE N-terminus. This family represents the shorter, B, chain of the homo-dimeric structure which is a guanine nucleotide-binding protein that binds and hydrolyses GTP. TrmE is homologous to the tetrahydrofolate-binding domain of N,N-dimethylglycine oxidase and indeed binds formyl-tetrahydrofolate. TrmE actively participates in the formylation reaction of uridine and regulates…
gene_ID=unitig45_38	CBM50	CAP	Cysteine-rich secretory protein family. This is a large family of cysteine-rich secretory proteins, antigen 5, and patho_	genesis-related 1 proteins (CAP) that are found in a wide range of organisms, including prokaryotes and non-vertebrate eukaryotes, The nine subfamilies of the mammalian CAP 'super'family include: the human glioma patho_	genesis-related 1 (GLIPR1), Golgi associated patho_	genesis related-1 (GAPR1) proteins, peptidase inhibitor 15 (PI15), peptidase inhibitor 16 (PI16), cysteine-rich secretory proteins (CRISPs), CRISP LCCL domain containing 1 (CRISPLD1), CRISP LCCL domain containing 2 (CRISPLD2), mannose receptor like and the R3H domain containing like proteins. Members are most often secreted and have an extracellular endocrine or paracrine function and are involve…	genesis, potentially as either proteases or protease inhibitors; in ion channel regulation in fertility; as tumour suppressor or pro-oncogenic _	genes in tissues including the prostate; and in cell-cell adhesion during fertilisation. The overall protein structural conservation within the CAP 'super'family results in fundamentally similar functions for the CAP domain in all members, yet the diversity outside of this core region dramatically alters the target specificity and, thus, the biological consequences. The Ca++-chelating function wo…
gene_ID=unitig46_3	GT48	AA_permease/AA_permease_2	Amino acid permease. /Amino acid permease.
gene_ID=unitig46_9	GH32	Ferric_reduct/FAD_binding_8	Ferric reductase like transmembrane component. This family includes a common region in the transmembrane proteins mammalian cytochrome B-245 heavy chain (gp9-1phox), ferric reductase transmembrane component in yeast and respiratory burst oxidase from mouse-ear cress. This may be a family of flavocytochromes capable of moving electrons across the plasma membrane. The Frp1 protein from S. pombe is …	gene codes for the beta chain of cytochrome B-245 and cytochrome B-245 is missing from patients with the disease./FAD-binding domain.
gene_ID=unitig46_10	GT34	p450/CRAL_TRIO	Cytochrome P450. Cytochrome P450s are haem-thiolate proteins involved in the oxidative degradation of various compounds. They are particularly well known for their role in the degradation of environmental toxins and mutagens. They can be divided into 4 classes, according to the method by which electrons from NAD(P)H are delivered to the catalytic site. Sequence conservation is relatively low with…	general topography and structural fold are highly conserved. The conserved core is composed of a coil termed the 'meander', a four-helix bundle, helices J and K, and two sets of beta-sheets. These constitute the haem-binding loop (with an absolutely conserved cysteine that serves as the 5th ligand for the haem iron), the proton-transfer groove and the absolutely conserved EXXR motif in helix K. W…	general enzymatic function is to catalyze regiospecific and stereospecific oxidation of non-activated hydrocarbons at physiological temperatures./CRAL/TRIO domain.
gene_ID=unitig46_11	GT4	ABC_tran/ABC2_membrane	ABC transporter. ABC transporters for a large family of proteins responsible for translocation of a variety of compounds across biological membranes. ABC transporters are the largest family of proteins in many completely sequenced bacteria. ABC transporters are composed of two copies of this domain and two copies of a transmembrane domain pfam00664. These four domains may belong to a single polyp…
gene_ID=unitig46_12	GT48	MFS_1	Major Facilitator Superfamily.
gene_ID=unitig48_1	GT20	PA14_2/PA14_2	GLEYA domain. This presumed domain is found in fungal adhesins and is related to the PA14 domain./GLEYA domain. This presumed domain is found in fungal adhesins and is related to the PA14 domain.
gene_ID=unitig50_5	GT5	Tropomyosin_1	Tropomyosin like. This family is a set of eukaryotic tropomyosins. Within the yeast Tmp1 and Tmp2, biochemical and sequence analyses indicate that Tpm2p spans four actin monomers along a filament, whereas Tpmlp spans five. Despite its shorter length, Tpm2p can compete with Tpm1p for binding to F-actin. Over-expression of Tpm2p in vivo alters the axial budding of haploids to a bipolar pattern, and…	genesis. The family also contains higher eukaryote Tmp3 members.
gene_ID=unitig50_22	GH18	Glyco_hydro_18	Glycosyl hydrolases family 18.
gene_ID=unitig50_23	GH18	Glyco_hydro_18	Glycosyl hydrolases family 18.
gene_ID=unitig50_24	GH18	Glyco_hydro_18	Glycosyl hydrolases family 18.
gene_ID=unitig50_35	CBM48	RCC1	Regulator of chromosome condensation (RCC1) repeat.
gene_ID=unitig50_62	GH13	Pkinase/dCMP_cyt_deam_1	Protein kinase domain. /Cytidine and deoxycytidylate deaminase zinc-binding region.
gene_ID=unitig50_71	GT48	MFS_1	Major Facilitator Superfamily.
gene_ID=unitig50_86	GH5	Choline_kinase	Choline/ethanolamine kinase. Choline kinase catalyzes the committed step in the synthesis of phosphatidylcholine by the CDP-choline pathway. This alignment covers the protein kinase portion of the protein. The divergence of this family makes it very difficult to create a model that specifically predicts choline/ethanolamine kinases only. However if [add Pfam ID here for Choline_kinase_C] is also …
gene_ID=unitig50_87	GH5	Choline_kinase	Choline/ethanolamine kinase. Choline kinase catalyzes the committed step in the synthesis of phosphatidylcholine by the CDP-choline pathway. This alignment covers the protein kinase portion of the protein. The divergence of this family makes it very difficult to create a model that specifically predicts choline/ethanolamine kinases only. However if [add Pfam ID here for Choline_kinase_C] is also …
gene_ID=unitig50_89	GH20	AP_endonuc_2	Xylose isomerase-like TIM barrel. This TIM alpha/beta barrel structure is found in xylose isomerase and in endonuclease IV (EC:3.1.21.2). This domain is also found in the N termini of bacterial myo-inositol catabolism proteins. These are involved in the myo-inositol catabolism pathway, and is required for growth on myo-inositol in Rhizobium leguminosarum bv. viciae.
gene_ID=unitig50_116	CBM50	CAP/Fungal_trans	Cysteine-rich secretory protein family. This is a large family of cysteine-rich secretory proteins, antigen 5, and patho_	genesis-related 1 proteins (CAP) that are found in a wide range of organisms, including prokaryotes and non-vertebrate eukaryotes, The nine subfamilies of the mammalian CAP 'super'family include: the human glioma patho_	genesis-related 1 (GLIPR1), Golgi associated patho_	genesis related-1 (GAPR1) proteins, peptidase inhibitor 15 (PI15), peptidase inhibitor 16 (PI16), cysteine-rich secretory proteins (CRISPs), CRISP LCCL domain containing 1 (CRISPLD1), CRISP LCCL domain containing 2 (CRISPLD2), mannose receptor like and the R3H domain containing like proteins. Members are most often secreted and have an extracellular endocrine or paracrine function and are involve…	genesis, potentially as either proteases or protease inhibitors; in ion channel regulation in fertility; as tumour suppressor or pro-oncogenic _	genes in tissues including the prostate; and in cell-cell adhesion during fertilisation. The overall protein structural conservation within the CAP 'super'family results in fundamentally similar functions for the CAP domain in all members, yet the diversity outside of this core region dramatically alters the target specificity and, thus, the biological consequences. The Ca++-chelating function wo…
gene_ID=unitig50_124	GH84	AMP_N/Peptidase_M24	Aminopeptidase P, N-terminal domain. This domain is structurally very similar to the creatinase N-terminal domain (pfam01321). However, little or no sequence similarity exists between the two families./Metallopeptidase family M24. This family contains metallopeptidases. It also contains non-peptidase homologues such as the N terminal domain of Spt16 which is a histone H3-H4 binding module.
gene_ID=unitig50_126	GT92	Asp_protease	Aspartyl protease. This family of eukaryotic aspartyl proteases have a fold similar to retroviral proteases which implies they function proteolytically during regulated protein turnover.
gene_ID=unitig50_146	GH65	Cation_ATPase_N/E-1E2_ATPase/Hydrolase_like2/Hydrolase/Cation_ATPase_C	Cation transporter/ATPase, N-terminus. Members of this families are involved in Na+/K+, H+/K+, Ca++ and Mg++ transport./E-1E2 ATPase. /Putative hydrolase of sodium-potassium ATPase alpha subunit. This is a putative hydrolase of the sodium-potassium ATPase alpha subunit./haloacid dehalogenase-like hydrolase. This family is structurally different from the alpha/beta hydrolase family (pfam00561). Th…
gene_ID=unitig50_159	GT2	BCDHK_Adom3/HATPase_c	Mitochondrial branched-chain alpha-ketoacid dehydrogenase kinase. Catabolism and synthesis of leucine, isoleucine and valine are finely balanced, allowing the body to make the most of dietary input but removing excesses to prevent toxic build-up of their corresponding keto-acids. This is the butyryl-CoA dehydrogenase, subunit A domain 3, a largely alpha-helical bundle of the enzyme BCDHK. This en…
gene_ID=unitig50_162	AA3	Pyr_redox_2	Pyridine nucleotide-disulphide oxidoreductase. This family includes both class I and class II oxidoreductases and also NADH oxidases and peroxidases. This domain is actually a small NADH binding domain within a larger FAD binding domain.
gene_ID=unitig50_164	GT48	AA_permease_2/AA_permease	Amino acid permease. /Amino acid permease.
gene_ID=unitig50_171	GH31	COX6B	Cytochrome oxidase c subunit VIb. Cytochrome c oxidase, a 13 sub-unit complex, EC:1.9.3.1 is the terminal oxidase in the mitochondrial electron transport chain. This family is composed of the potentially heme-binding subunit IVb of the oxidase.
gene_ID=unitig50_177	AA1	Cu-oxidase_3/Cu-oxidase/Cu-oxidase_2	Multicopper oxidase. This entry contains many divergent copper oxidase-like domains that are not recognised by the pfam00394 model./Multicopper oxidase. Many of the proteins in this family contain multiple similar copies of this plastocyanin-like domain./Multicopper oxidase. This entry contains many divergent copper oxidase-like domains that are not recognised by the pfam00394 model.
gene_ID=unitig50_186	CE11	Helicase_C_3/SNF2_N/Helicase_C	Helicase conserved C-terminal domain. This domain family is found in a wide variety of helicases and helicase-related proteins./SNF2 family N-terminal domain. This domain is found in proteins involved in a variety of processes including transcription regulation (e.g., SNF2, STH1, brahma, MOT1), DNA repair (e.g. ERCC6, RAD16, RAD5), DNA recombination (e.g. RAD54), and chromatin unwinding (e.g. ISW…
gene_ID=unitig50_191	CE11	Helicase_C/HA2/OB_NTP_bind	Helicase conserved C-terminal domain. The Prosite family is restricted to DEAD/H helicases, whereas this domain family is found in a wide variety of helicases and helicase related proteins. It may be that this is not an autonomously folding unit, but an integral part of the helicase./Helicase associated domain (HA2). This presumed domain is about 90 amino acid residues in length. It is found is a…
gene_ID=unitig50_202	GH76	ADH_N/ADH_zinc_N	Alcohol dehydrogenase GroES-like domain. This is the catalytic domain of alcohol dehydrogenases. Many of them contain an inserted zinc binding domain. This domain has a GroES-like structure./Zinc-binding dehydrogenase.
gene_ID=unitig50_207	GT48	MFS_1	Major Facilitator Superfamily.
gene_ID=unitig50_215	AA6	Aldo_ket_red/Flavodoxin_1/FMN_red	Aldo/keto reductase family. This family includes a number of K+ ion channel beta chain regulatory domains - these are reported to have oxidoreductase activity./Flavodoxin. /NADPH-dependent FMN reductase.
gene_ID=unitig50_226	GT48	AA_permease_2	Amino acid permease.
gene_ID=unitig50_236	GH5	Gln-synt_N/Gln-synt_C	Glutamine synthetase, beta-Grasp domain. /Glutamine synthetase, catalytic domain.
gene_ID=unitig50_243	GH81	Glyco_hydro_81	Glycosyl hydrolase family 81. Family of eukaryotic beta-1,3-glucanases. Within the Aspergillus fumigatus protein two perfectly conserved Glu residues (E550 or E554) have been proposed as putative nucleophiles of the active site of the Engl1 endoglucanase, while the proton donor would be D475. The endo-beta-1,3-glucanase activity is essential for efficient spore release.
gene_ID=unitig50_244	GH81	Glyco_hydro_81	Glycosyl hydrolase family 81. Family of eukaryotic beta-1,3-glucanases. Within the Aspergillus fumigatus protein two perfectly conserved Glu residues (E550 or E554) have been proposed as putative nucleophiles of the active site of the Engl1 endoglucanase, while the proton donor would be D475. The endo-beta-1,3-glucanase activity is essential for efficient spore release.
gene_ID=unitig50_246	GH92	adh_short/adh_short_C2	short chain dehydrogenase. This family contains a wide variety of dehydrogenases./Enoyl-(Acyl carrier protein) reductase.
gene_ID=unitig50_247	GH63	Glyco_hydro_63	Mannosyl oligosaccharide glucosidase. This is a family of eukaryotic enzymes belonging to glycosyl hydrolase family 63. They catalyze the specific cleavage of the non-reducing terminal glucose residue from Glc(3)Man(9)GlcNAc(2). Mannosyl oligosaccharide glucosidase EC:3.2.1.106 is the first enzyme in the N-linked oligosaccharide processing pathway.
gene_ID=unitig50_263	CBM48	DnaJ/DnaJ_CXXCXGXG	DnaJ domain. DnaJ domains (J-domains) are associated with hsp70 heat-shock system and it is thought that this domain mediates the interaction. DnaJ-domain is therefore part of a chaperone (protein folding) system. The T-antigens, although not in Prosite are confirmed as DnaJ containing domains from literature./DnaJ central domain. The central cysteine-rich (CR) domain of DnaJ proteins contains fo…
gene_ID=unitig50_279	GH31	Gal_mutarotas_2	Galactose mutarotase-like. This family is found N-terminal to glycosyl-hydrolase domains, and appears to be similar to the galactose mutarotase superfamily.
gene_ID=unitig50_280	GH31	Glyco_hydro_31	Glycosyl hydrolases family 31. Glycosyl hydrolases are key enzymes of carbohydrate metabolism. Family 31 comprises of enzymes that are, or similar to, alpha- galactosidases.
gene_ID=unitig50_288	GT2	DUF1729/zf-MaoC/MaoC_dehydratas/Acyl_transf_1	Domain of unknown function (DUF1729). This domain of unknown function is found in fatty acid synthase beta subunits together with the MaoC-like domain (pfam01575) and the Acyltransferase domain (pfam00698). The domain has been identified in fungi and bacteria./Metal-binding domain of MaoC dehydratase. /MaoC like domain. The maoC _	gene is part of a operon with maoA which is involved in the synthesis of monoamine oxidase. The MaoC protein is found to share similarity with a wide variety of enzymes; estradiol 17 beta-dehydrogenase 4, peroxisomal hydratase-dehydrogenase-epimerase, fatty acid synthase beta subunit. Several bacterial proteins that are composed solely of this domain have (R)-specific enoyl-CoA hydratase activity…
gene_ID=unitig50_294	GT4	Abhydro_lipase/Abhydrolase_1	Partial alpha/beta-hydrolase lipase region. This family corresponds to a N-terminal part of an alpha/beta hydrolase domain./alpha/beta hydrolase fold. This catalytic domain is found in a very wide range of enzymes.
gene_ID=unitig50_300	CBM48	DnaJ	DnaJ domain. DnaJ domains (J-domains) are associated with hsp70 heat-shock system and it is thought that this domain mediates the interaction. DnaJ-domain is therefore part of a chaperone (protein folding) system. The T-antigens, although not in Prosite are confirmed as DnaJ containing domains from literature.
gene_ID=unitig50_307	GH32	Ferric_reduct/FAD_binding_8/NAD_binding_6	Ferric reductase like transmembrane component. This family includes a common region in the transmembrane proteins mammalian cytochrome B-245 heavy chain (gp9-1phox), ferric reductase transmembrane component in yeast and respiratory burst oxidase from mouse-ear cress. This may be a family of flavocytochromes capable of moving electrons across the plasma membrane. The Frp1 protein from S. pombe is …	gene codes for the beta chain of cytochrome B-245 and cytochrome B-245 is missing from patients with the disease./FAD-binding domain. /Ferric reductase NAD binding domain.
gene_ID=unitig50_328	GH13	Alpha-amylase	Alpha amylase, catalytic domain. Alpha amylase is classified as family 13 of the glycosyl hydrolases. The structure is an 8 stranded alpha/beta barrel containing the active site, interrupted by a ~70 a.a. calcium-binding domain protruding between beta strand 3 and alpha helix 3, and a carboxyl-terminal Greek key beta-barrel domain.
gene_ID=unitig50_329	GH18	DER1/DUF307/Na_Ca_ex/Na_Ca_ex	Der-1like family. The endoplasmic reticulum (ER) of the yeast Saccharomyces cerevisiae contains of proteolytic system able to selectively degrade misfolded lumenal secretory proteins. For examination of the components involved in this degradation process, mutants were isolated. They could be divided into four complementation groups. The mutations led to stabilisation of two different substrates f…	gene codes for a novel, hydrophobic protein, that is localised to the ER. Deletion of DER1 abolished degradation of the substrate proteins. The function of the Der1 protein seems to be specifically required for the degradation process associated with the ER. Interestingly this family seems distantly related to the Rhomboid family of membrane peptidases. Suggesting that this family may also mediat…
gene_ID=unitig50_348	GH28	Zn_clus	Fungal Zn(2)-Cys(6) binuclear cluster domain.
gene_ID=unitig50_353	GT39	PMT/MIR	Dolichyl-phosphate-mannose-protein mannosyltransferase. This is a family of Dolichyl-phosphate-mannose-protein mannosyltransferase proteins EC:2.4.1.109. These proteins are responsible for O-linked glycosylation of proteins, they catalyze the reaction:- Dolichyl phosphate D-mannose + protein <=> dolichyl phosphate + O-D-mannosyl-protein. Also in this family is the Drosophila rotated abdomen prote…
gene_ID=unitig50_354	GT48	AA_permease_2/AA_permease_2	Amino acid permease. /Amino acid permease.
gene_ID=unitig50_366	CE11	DEAD/Helicase_C	DEAD/DEAH box helicase. Members of this family include the DEAD and DEAH box helicases. Helicases are involved in unwinding nucleic acids. The DEAD box helicases are involved in various aspects of RNA metabolism, including nuclear transcription, pre mRNA splicing, ribosome bio_	genesis, nucleocytoplasmic transport, translation, RNA decay and organellar _	gene expression./Helicase conserved C-terminal domain. The Prosite family is restricted to DEAD/H helicases, whereas this domain family is found in a wide variety of helicases and helicase related proteins. It may be that this is not an autonomously folding unit, but an integral part of the helicase.
gene_ID=unitig50_371	GT48	RVT_1	Reverse transcriptase (RNA-dependent DNA polymerase). A reverse transcriptase _	gene is usually indicative of a mobile element such as a retrotransposon or retrovirus. Reverse transcriptases occur in a variety of mobile elements, including retrotransposons, retroviruses, group II introns, bacterial msDNAs, hepadnaviruses, and caulimoviruses.
gene_ID=unitig50_376	GT2	Chitin_synth_1N/Chitin_synth_1/Chitin_synth_2	Chitin synthase N-terminal. This is the N-terminal domain of Chitin synthase (pfam01644)./Chitin synthase. This region is found commonly in chitin synthases classes I, II and III. Chitin a linear homopolymer of GlcNAc residues, it is an important component of the cell wall of fungi and is synthesised on the cytoplasmic surface of the cell membrane by membrane bound chitin synthases./Chitin syntha…
gene_ID=unitig50_392	GH32	Ferric_reduct/FAD_binding_8/NAD_binding_6	Ferric reductase like transmembrane component. This family includes a common region in the transmembrane proteins mammalian cytochrome B-245 heavy chain (gp9-1phox), ferric reductase transmembrane component in yeast and respiratory burst oxidase from mouse-ear cress. This may be a family of flavocytochromes capable of moving electrons across the plasma membrane. The Frp1 protein from S. pombe is …	gene codes for the beta chain of cytochrome B-245 and cytochrome B-245 is missing from patients with the disease./FAD-binding domain. /Ferric reductase NAD binding domain.
gene_ID=unitig50_408	GH20	AP_endonuc_2	Xylose isomerase-like TIM barrel. This TIM alpha/beta barrel structure is found in xylose isomerase and in endonuclease IV (EC:3.1.21.2). This domain is also found in the N termini of bacterial myo-inositol catabolism proteins. These are involved in the myo-inositol catabolism pathway, and is required for growth on myo-inositol in Rhizobium leguminosarum bv. viciae.
gene_ID=unitig50_414	GH47	PA/Peptidase_M28/TFR_dimer	PA domain. The PA (Protease associated) domain is found as an insert domain in diverse proteases. The PA domain is also found in a plant vacuolar sorting receptor and members of the RZF family. It has been suggested that this domain forms a lid-like structure that covers the active site in active proteases, and is involved in protein recognition in vacuolar sorting receptors./Peptidase family M28…
gene_ID=unitig50_418	GH76	ADH_N/ADH_zinc_N	Alcohol dehydrogenase GroES-like domain. This is the catalytic domain of alcohol dehydrogenases. Many of them contain an inserted zinc binding domain. This domain has a GroES-like structure./Zinc-binding dehydrogenase.
gene_ID=unitig50_419	GH76	ADH_N/ADH_zinc_N	Alcohol dehydrogenase GroES-like domain. This is the catalytic domain of alcohol dehydrogenases. Many of them contain an inserted zinc binding domain. This domain has a GroES-like structure./Zinc-binding dehydrogenase.
gene_ID=unitig50_420	GT4	Abhydrolase_1	alpha/beta hydrolase fold. This catalytic domain is found in a very wide range of enzymes.
gene_ID=unitig50_437	GT48	MFS_1	Major Facilitator Superfamily.
gene_ID=unitig50_462	CE10	DUF2424	Protein of unknown function (DUF2424). This is a family of proteins conserved in yeasts. The function is not known.
gene_ID=unitig50_481	GT48	MFS_1	Major Facilitator Superfamily.
gene_ID=unitig50_491	GH3/GT2/GH92	adh_short_C2/ketoacyl-synt/ACPS	Enoyl-(Acyl carrier protein) reductase. /Beta-ketoacyl synthase, N-terminal domain. The structure of beta-ketoacyl synthase is similar to that of the thiolase family (pfam00108) and also chalcone synthase. The active site of beta-ketoacyl synthase is located between the N and C-terminal domains. The N-terminal domain contains most of the structures involved in dimer formation and also the active …
gene_ID=unitig55_2	GT50	Cyclin_N/Cyclin_C	Cyclin, N-terminal domain. Cyclins regulate cyclin dependent kinases (CDKs). Human cyclin-O is a Uracil-DNA glycosylase that is related to other cyclins. Cyclins contain two domains of similar all-alpha fold, of which this family corresponds with the N-terminal domain./Cyclin, C-terminal domain. Cyclins regulate cyclin dependent kinases (CDKs). Human CCNO is a Uracil-DNA glycosylase that is relat…
gene_ID=unitig55_6	GH76	Glyco_hydro_76	Glycosyl hydrolase family 76. Family of alpha-1,6-mannanases.
gene_ID=unitig55_11	GT71	Mannosyl_trans3	Mannosyltransferase putative. This family is conserved in fungi. Several members are annotated as being alpha-1,3-mannosyltransferase but this could not be confirmed.
gene_ID=unitig55_19	CE9	Glucosamine_iso	Glucosamine-6-phosphate isomerases/6-phosphogluconolactonase.
gene_ID=unitig55_24	GT51	FHA/Pkinase_Tyr/Pkinase/FHA	FHA domain. The FHA (Forkhead-associated) domain is a phosphopeptide binding motif./Protein tyrosine kinase. /Protein kinase domain. /FHA domain. The FHA (Forkhead-associated) domain is a phosphopeptide binding motif.
gene_ID=unitig55_46	CE9	Glucosamine_iso	Glucosamine-6-phosphate isomerases/6-phosphogluconolactonase.
gene_ID=unitig56_13	GT48	Sugar_tr/MFS_1	Sugar (and other) transporter. /Major Facilitator Superfamily.
gene_ID=unitig56_15	GH103/GH1	Polysacc_synt_2/RmlD_sub_bind/Epimerase/3Beta_HSD/Epimerase_Csub/Aldose_epim/AATase	Polysaccharide biosynthesis protein. This is a family of diverse bacterial polysaccharide biosynthesis proteins including the CapD protein, WalL protein mannosyl-transferase and several putative epimerases (e.g. WbiI)./RmlD substrate binding domain. L-rhamnose is a saccharide required for the virulence of some bacteria. Its precursor, dTDP-L-rhamnose, is synthesised by four different enzymes the …
gene_ID=unitig58_5	GT39	PMT/MIR/DHHA2	Dolichyl-phosphate-mannose-protein mannosyltransferase. This is a family of Dolichyl-phosphate-mannose-protein mannosyltransferase proteins EC:2.4.1.109. These proteins are responsible for O-linked glycosylation of proteins, they catalyze the reaction:- Dolichyl phosphate D-mannose + protein <=> dolichyl phosphate + O-D-mannosyl-protein. Also in this family is the Drosophila rotated abdomen prote…
gene_ID=unitig58_10	AA6	Flavodoxin_1/NIR_SIR_ferr/NIR_SIR	Flavodoxin. /Nitrite/Sulfite reductase ferredoxin-like half domain. Sulfite and Nitrite reductases are key to both biosynthetic assimilation of sulfur and nitrogen and dissimilation of oxidized anions for energy transduction. Two copies of this repeat are found in Nitrite and Sulfite reductases and form a single structural domain./Nitrite and sulphite reductase 4Fe-4S domain. Sulphite and nitrite…
gene_ID=unitig58_20	CE10	DPPIV_N/Peptidase_S9	Dipeptidyl peptidase IV (DPP IV) N-terminal region. This family is an alignment of the region to the N-terminal side of the active site. The Prosite motif does not correspond to this Pfam entry./Prolyl oligopeptidase family.
gene_ID=unitig58_29	GH72	GTP1_OBG/MMR_HSR1	GTP1/OBG. The N-terminal domain of B. subtilis GTPase obgE has the OBG fold, which is formed by three glycine-rich regions inserted into a small 8-stranded beta-sandwich these regions form six left-handed collagen-like helices packed and H-bonded together./50S ribosome-binding GTPase. The full-length GTPase protein is required for the complete activity of the protein of interacting with the 50S r…
gene_ID=unitig58_30	CE11	DEAD/Helicase_C	DEAD/DEAH box helicase. Members of this family include the DEAD and DEAH box helicases. Helicases are involved in unwinding nucleic acids. The DEAD box helicases are involved in various aspects of RNA metabolism, including nuclear transcription, pre mRNA splicing, ribosome bio_	genesis, nucleocytoplasmic transport, translation, RNA decay and organellar _	gene expression./Helicase conserved C-terminal domain. The Prosite family is restricted to DEAD/H helicases, whereas this domain family is found in a wide variety of helicases and helicase related proteins. It may be that this is not an autonomously folding unit, but an integral part of the helicase.
gene_ID=unitig58_44	CE9	Glucosamine_iso	Glucosamine-6-phosphate isomerases/6-phosphogluconolactonase.
gene_ID=unitig58_49	GT87	NUDIX	NUDIX domain.
gene_ID=unitig58_56	CBM21	SUR7	SUR7/PalI family. This family consists of several fungal-specific SUR7 proteins. Its activity regulates expression of RVS161, a homologue of human endophilin, suggesting a function for both in endocytosis. The protein carries four transmembrane domains and is thus likely to act as an anchoring protein for the eisosome to the plasma membrane. Eisosomes are the immobile protein complexes, that incl…
gene_ID=unitig58_57	CBM21	SUR7	SUR7/PalI family. This family consists of several fungal-specific SUR7 proteins. Its activity regulates expression of RVS161, a homologue of human endophilin, suggesting a function for both in endocytosis. The protein carries four transmembrane domains and is thus likely to act as an anchoring protein for the eisosome to the plasma membrane. Eisosomes are the immobile protein complexes, that incl…
gene_ID=unitig58_68	GH32	Indigoidine_A/PfkB	Indigoidine synthase A like protein. Indigoidine is a blue pigment synthesised by Erwinia chrysanthemi implicated in pathogenicity and protection from oxidative stress. IdgA is involved in indigoidine biosynthesis, but its specific function is unknown. The recommended name for this protein is now pseudouridine-5'-phosphate glycosidase./pfkB family carbohydrate kinase. This family includes a varie…
gene_ID=unitig58_70	GH78	Chalcone	Chalcone-flavanone isomerase. Chalcone-flavanone isomerase is a plant enzyme responsible for the isomerisation of chalcone to naringenin, a key step in the biosynthesis of flavonoids.
gene_ID=unitig58_71	GT4	NTP_transferase	Nucleotidyl transferase. This family includes a wide range of enzymes which transfer nucleotides onto phosphosugars.
gene_ID=unitig58_78	GT48	MFS_1	Major Facilitator Superfamily.
gene_ID=unitig58_79	CBM48	DnaJ/DnaJ-X/Complex1_LYR_1	DnaJ domain. DnaJ domains (J-domains) are associated with hsp70 heat-shock system and it is thought that this domain mediates the interaction. DnaJ-domain is therefore part of a chaperone (protein folding) system. The T-antigens, although not in Prosite are confirmed as DnaJ containing domains from literature./X-domain of DnaJ-containing. IN certain plant and yeast proteins, the DnaJ-1 proteins h…	genesis in mitochondria.
gene_ID=unitig58_80	CE10	FMO-like	Flavin-binding monooxygenase-like. This family includes FMO proteins, cyclohexanone mono-oxygenase and a number of different mono-oxygenases.
gene_ID=unitig58_84	GT2	His_Phos_1	Histidine phosphatase superfamily (branch 1). The histidine phosphatase superfamily is so named because catalysis centres on a conserved His residue that is transiently phosphorylated during the catalytic cycle. Other conserved residues contribute to a 'phosphate pocket' and interact with the phospho group of substrate before, during and after its transfer to the His residue. Structure and sequen…
gene_ID=unitig58_88	GT48	AA_permease_2/AA_permease	Amino acid permease. /Amino acid permease.
gene_ID=unitig58_93	CBM48	DnaJ	DnaJ domain. DnaJ domains (J-domains) are associated with hsp70 heat-shock system and it is thought that this domain mediates the interaction. DnaJ-domain is therefore part of a chaperone (protein folding) system. The T-antigens, although not in Prosite are confirmed as DnaJ containing domains from literature.
gene_ID=unitig58_117	GT2	Aminotran_3	Aminotransferase class-III.
gene_ID=unitig58_120_partial	GT2	Myosin_head/Myosin_TH1	Myosin head (motor domain). /Myosin tail.
gene_ID=unitig72_1	GT2	Aminotran_3/Aminotran_3	Aminotransferase class-III. /Aminotransferase class-III.
gene_ID=unitig72_4	GT2	Myosin_head/Myosin_TH1	Myosin head (motor domain). /Myosin tail.
gene_ID=unitig72_26	CE11	ResIII/Helicase_C/Peptidase_C13	Type III restriction enzyme, res subunit. /Helicase conserved C-terminal domain. The Prosite family is restricted to DEAD/H helicases, whereas this domain family is found in a wide variety of helicases and helicase related proteins. It may be that this is not an autonomously folding unit, but an integral part of the helicase./Peptidase C13 family. Members of this family are asparaginyl peptidases…
gene_ID=unitig72_27	GH5	Pol_alpha_B_N/DNA_pol_E_B	DNA polymerase alpha subunit B N-terminal. This is the eukaryotic DNA polymerase alpha subunit B N-terminal domain which is involved in complex formation. Also see pfam04058./DNA polymerase alpha/epsilon subunit B. This family contains a number of DNA polymerase subunits. The B subunit of the DNA polymerase alpha plays an essential role at the initial stage of DNA replication in S. cerevisiae and…
gene_ID=unitig72_35	CBM50	CAP	Cysteine-rich secretory protein family. This is a large family of cysteine-rich secretory proteins, antigen 5, and patho_	genesis-related 1 proteins (CAP) that are found in a wide range of organisms, including prokaryotes and non-vertebrate eukaryotes, The nine subfamilies of the mammalian CAP 'super'family include: the human glioma patho_	genesis-related 1 (GLIPR1), Golgi associated patho_	genesis related-1 (GAPR1) proteins, peptidase inhibitor 15 (PI15), peptidase inhibitor 16 (PI16), cysteine-rich secretory proteins (CRISPs), CRISP LCCL domain containing 1 (CRISPLD1), CRISP LCCL domain containing 2 (CRISPLD2), mannose receptor like and the R3H domain containing like proteins. Members are most often secreted and have an extracellular endocrine or paracrine function and are involve…	genesis, potentially as either proteases or protease inhibitors; in ion channel regulation in fertility; as tumour suppressor or pro-oncogenic _	genes in tissues including the prostate; and in cell-cell adhesion during fertilisation. The overall protein structural conservation within the CAP 'super'family results in fundamentally similar functions for the CAP domain in all members, yet the diversity outside of this core region dramatically alters the target specificity and, thus, the biological consequences. The Ca++-chelating function wo…
gene_ID=unitig72_36	GT31	Adaptin_N	Adaptin N terminal region. This family consists of the N terminal region of various alpha, beta and gamma subunits of the AP-1, AP-2 and AP-3 adaptor protein complexes. The adaptor protein (AP) complexes are involved in the formation of clathrin-coated pits and vesicles. The N-terminal region of the various adaptor proteins (APs) is constant by comparison to the C-terminal which is variable withi…
gene_ID=unitig72_49	GT48	AA_permease/AA_permease_2	Amino acid permease. /Amino acid permease.
gene_ID=unitig72_50	GT48	MFS_1	Major Facilitator Superfamily.
gene_ID=unitig72_60	GT15	Glyco_transf_15	Glycolipid 2-alpha-mannosyltransferase. This is a family of alpha-1,2 mannosyl-transferases involved in N-linked and O-linked glycosylation of proteins. Some of the enzymes in this family have been shown to be involved in O- and N-linked glycan modifications in the Golgi.
gene_ID=unitig75_2	CBM48/GH13	CBM_48/Alpha-amylase/Alpha-amylase_C	Carbohydrate-binding module 48 (Isoamylase N-terminal domain). This domain is found in a range of enzymes that act on branched substrates - isoamylase, pullulanase and branching enzyme. This family also contains the beta subunit of 5' AMP activated kinase./Alpha amylase, catalytic domain. Alpha amylase is classified as family 13 of the glycosyl hydrolases. The structure is an 8 stranded alpha/bet…
gene_ID=unitig79_1	CE11	DEAD/rRNA_proc-arch/DSHCT	DEAD/DEAH box helicase. Members of this family include the DEAD and DEAH box helicases. Helicases are involved in unwinding nucleic acids. The DEAD box helicases are involved in various aspects of RNA metabolism, including nuclear transcription, pre mRNA splicing, ribosome bio_	genesis, nucleocytoplasmic transport, translation, RNA decay and organellar _	gene expression./rRNA-processing arch domain. Mtr4 is the essential RNA helicase, and is an exosome-activating cofactor. This arch domain is carried in Mtr4 and Ski2 (the cytosolic homologue of Mtr4). The arch domain is required for proper 5.8S rRNA processing, and appears to function independently of canonical helicase activity./DSHCT (NUC185) domain. This C terminal domain is found in DOB1/SK12…
gene_ID=unitig79_16	CE11	E1_dh/DEAD/Helicase_C/Sec63/DEAD/Sec63	Dehydrogenase E1 component. This family uses thiamine pyrophosphate as a cofactor. This family includes pyruvate dehydrogenase, 2-oxoglutarate dehydrogenase and 2-oxoisovalerate dehydrogenase./DEAD/DEAH box helicase. Members of this family include the DEAD and DEAH box helicases. Helicases are involved in unwinding nucleic acids. The DEAD box helicases are involved in various aspects of RNA metab…	genesis, nucleocytoplasmic transport, translation, RNA decay and organellar _	gene expression./Helicase conserved C-terminal domain. The Prosite family is restricted to DEAD/H helicases, whereas this domain family is found in a wide variety of helicases and helicase related proteins. It may be that this is not an autonomously folding unit, but an integral part of the helicase./Sec63 Brl domain. This domain (also known as the Brl domain) is required for assembly of function…	genesis, nucleocytoplasmic transport, translation, RNA decay and organellar _	gene expression./Sec63 Brl domain. This domain (also known as the Brl domain) is required for assembly of functional endoplasmic reticulum translocons.
gene_ID=unitig79_28_partial	GH84	Peptidase_M24	Metallopeptidase family M24. This family contains metallopeptidases. It also contains non-peptidase homologues such as the N terminal domain of Spt16 which is a histone H3-H4 binding module.
gene_ID=unitig82_12	GT48	AA_permease/AA_permease_2	Amino acid permease. /Amino acid permease.
gene_ID=unitig82_13	GT48	AA_permease/AA_permease_2/AA_permease/AA_permease_2/AA_permease/AA_permease_2	Amino acid permease. /Amino acid permease. /Amino acid permease. /Amino acid permease. /Amino acid permease. /Amino acid permease.
gene_ID=unitig82_21	GT48	DUF2305/MFS_1	Uncharacterized conserved protein (DUF2305). This family of proteins is conserved from plants to humans. The function is unknown./Major Facilitator Superfamily.
gene_ID=unitig82_30	GH72	MMR_HSR1	50S ribosome-binding GTPase. The full-length GTPase protein is required for the complete activity of the protein of interacting with the 50S ribosome and binding of both adenine and guanine nucleotides, with a preference for guanine nucleotide.
gene_ID=unitig90_3	GH28	Zn_clus	Fungal Zn(2)-Cys(6) binuclear cluster domain.
gene_ID=unitig92_11	CE11	DEAD/Helicase_C	DEAD/DEAH box helicase. Members of this family include the DEAD and DEAH box helicases. Helicases are involved in unwinding nucleic acids. The DEAD box helicases are involved in various aspects of RNA metabolism, including nuclear transcription, pre mRNA splicing, ribosome bio_	genesis, nucleocytoplasmic transport, translation, RNA decay and organellar _	gene expression./Helicase conserved C-terminal domain. The Prosite family is restricted to DEAD/H helicases, whereas this domain family is found in a wide variety of helicases and helicase related proteins. It may be that this is not an autonomously folding unit, but an integral part of the helicase.
gene_ID=unitig92_12	GT32	Gly_transf_sug	Glycosyltransferase sugar-binding region containing DXD motif. The DXD motif is a short conserved motif found in many families of glycosyltransferases, which add a range of different sugars to other sugars, phosphates and proteins. DXD-containing glycosyltransferases all use nucleoside diphosphate sugars as donors and require divalent cations, usually manganese. The DXD motif is expected to play …
gene_ID=unitig92_23	GT2	Aminotran_3	Aminotransferase class-III.
gene_ID=unitig93_3	GH76	CDC50/ADH_zinc_N	LEM3 (ligand-effect modulator 3) family / CDC50 family. Members of this family have been predicted to contain transmembrane helices. The family member LEM3 is a ligand-effect modulator, mutation of which increases glucocorticoid receptor activity in response to dexamethasone and also confers increased activity on other intracellular receptors including the progesterone, oestrogen and mineralocort…	genes YNR048w, YNL323w and YCR094w (CDC50) show redundancy of function and are involved in regulation of transcription via CDC39. CDC39 (also known as NOT1) is normally a negative regulator of transcription either by affecting the _	general RNA polymerase II machinery or by altering chromatin structure. One function of CDC39 is to block activation of the mating response pathway in the absence of pheromone, and mutation causes arrest in G1 by activation of the pathway. It may be that the cold-sensitive arrest in G1 noticed in CDC50 mutants may be due to inactivation of CDC39. The effects of LEM3 on glucocorticoid receptor act…
gene_ID=unitig93_7	GT58	ALG3	ALG3 protein. The formation of N-glycosidic linkages of glycoproteins involves the ordered assembly of the common Glc3Man9GlcNAc2 core-oligosaccharide on the lipid carrier dolichyl pyrophosphate. Whereas early mannosylation steps occur on the cytoplasmic side of the endoplasmic reticulum with GDP-Man as donor, the final reactions from Man5GlcNAc2-PP-Dol to Man9GlcNAc2-PP-Dol on the lumenal side u…	gene encodes the Dol-P-Man:Man5GlcNAc2-PP-Dol mannosyltransferase.
gene_ID=unitig93_22	GT48	Sugar_tr/MFS_1	Sugar (and other) transporter. /Major Facilitator Superfamily.
gene_ID=unitig93_26	GT4	Abhydrolase_6/Abhydrolase_1	Alpha/beta hydrolase family. This family contains alpha/beta hydrolase enzymes of diverse specificity./alpha/beta hydrolase fold. This catalytic domain is found in a very wide range of enzymes.
gene_ID=unitig93_32	GT48	MFS_1	Major Facilitator Superfamily.
gene_ID=unitig93_43	GT48	Beta_elim_lyase/MFS_1/Sugar_tr	Beta-eliminating lyase. /Major Facilitator Superfamily. /Sugar (and other) transporter.
gene_ID=unitig93_47	GT48	MFS_1	Major Facilitator Superfamily.
gene_ID=unitig93_63	GT87	NUDIX	NUDIX domain.
gene_ID=unitig93_65	GT41	TPR_11/TPR_11	TPR repeat. /TPR repeat.
gene_ID=unitig93_75	CBM48	DnaJ	DnaJ domain. DnaJ domains (J-domains) are associated with hsp70 heat-shock system and it is thought that this domain mediates the interaction. DnaJ-domain is therefore part of a chaperone (protein folding) system. The T-antigens, although not in Prosite are confirmed as DnaJ containing domains from literature.
gene_ID=unitig93_78	GT48	AA_permease_2/AA_permease	Amino acid permease. /Amino acid permease.
gene_ID=unitig93_80	GT91	DUF3589	Protein of unknown function (DUF3589). This family of proteins is found in eukaryotes. Proteins in this family are typically between 541 and 717 amino acids in length. The function of this family is not known,
gene_ID=unitig93_92	GT48	MFS_1	Major Facilitator Superfamily.
gene_ID=unitig93_107	GH92	adh_short/adh_short_C2	short chain dehydrogenase. This family contains a wide variety of dehydrogenases./Enoyl-(Acyl carrier protein) reductase.
gene_ID=unitig93_110	GT2	6PF2K/His_Phos_1/Gon7	6-phosphofructo-2-kinase. This enzyme occurs as a bifunctional enzyme with fructose-2,6-bisphosphatase. The bifunctional enzyme catalyzes both the synthesis and degradation of fructose-2,6-bisphosphate, a potent regulator of glycolysis. This enzyme contains a P-loop motif./Histidine phosphatase superfamily (branch 1). The histidine phosphatase superfamily is so named because catalysis centres on …
gene_ID=unitig93_114	GH72/CBM43	Glyco_hydro_72/X8	Glucanosyltransferase. This is a family of glycosylphosphatidylinositol-anchored beta(-13)glucanosyltransferases. The active site residues in the Aspergillus fumigatus example are the two glutamate residues at 160 and 261./X8 domain. The X8 domain domain contains at least 6 conserved cysteine residues that presumably form three disulphide bridges. The domain is found in an Olive pollen allergen a…
gene_ID=unitig93_118	GT34	DUF1751/Glyco_transf_34	Eukaryotic integral membrane protein (DUF1751). This domain is found in eukaryotic integral membrane proteins. YOL107W, a Saccharomyces cerervisiae protein, has been shown to localise COP II vesicles./galactosyl transferase GMA12/MNN10 family. This family contains a number of glycosyltransferase enzymes that contain a DXD motif. This family includes a number of C. elegans homologues where the DXD…
gene_ID=unitig93_119	GT48	FKS1_dom1/Glucan_synthase	1,3-beta-glucan synthase subunit FKS1, domain-1. The FKS1_dom1 domain is likely to be the 'Class I' region just N-terminal to the first set of transmembrane helices that is involved in 1,3-beta-glucan synthesis itself. This family is found on proteins with family Glucan_synthase, pfam02364./1,3-beta-glucan synthase component. This family consists of various 1,3-beta-glucan synthase components inc…
gene_ID=unitig93_130	AA3/GT71	Mannosyl_trans3/Pyr_redox_2/Pyr_redox/Pyr_redox_dim	Mannosyltransferase putative. This family is conserved in fungi. Several members are annotated as being alpha-1,3-mannosyltransferase but this could not be confirmed./Pyridine nucleotide-disulphide oxidoreductase. This family includes both class I and class II oxidoreductases and also NADH oxidases and peroxidases. This domain is actually a small NADH binding domain within a larger FAD binding do…
gene_ID=unitig93_131	GT2	Glycos_transf_2	Glycosyl transferase family 2. Diverse family, transferring sugar from UDP-glucose, UDP-N-acetyl- galactosamine, GDP-mannose or CDP-abequose, to a range of substrates including cellulose, dolichol phosphate and teichoic acids.
gene_ID=unitig94_1_partial	GH76	ADH_zinc_N	Zinc-binding dehydrogenase.
gene_ID=unitig94_5	GH65	HMA/E-1E2_ATPase/Hydrolase	Heavy-metal-associated domain. /E-1E2 ATPase. /haloacid dehalogenase-like hydrolase. This family is structurally different from the alpha/beta hydrolase family (pfam00561). This family includes L-2-haloacid dehalogenase, epoxide hydrolases and phosphatases. The structure of the family consists of two domains. One is an inserted four helix bundle, which is the least well conserved region of the al…
gene_ID=unitig94_8	GH99	Guanylate_kin	Guanylate kinase.
gene_ID=unitig94_13	CBM48	adh_short/DnaJ/DnaJ_C	short chain dehydrogenase. This family contains a wide variety of dehydrogenases./DnaJ domain. DnaJ domains (J-domains) are associated with hsp70 heat-shock system and it is thought that this domain mediates the interaction. DnaJ-domain is therefore part of a chaperone (protein folding) system. The T-antigens, although not in Prosite are confirmed as DnaJ containing domains from literature./DnaJ …
gene_ID=unitig95_9	GH125	DUF1237	Protein of unknown function (DUF1237). This family contains a number of hypothetical proteins of about 450 residues in length. Their function is unknown, and most are bacterial. However, structurally this family is part of the 6 hairpin glycosidase superfamily, suggesting a glycosyl hydrolase function.
gene_ID=unitig95_22	GT41	Acetyltransf_1	Acetyltransferase (GNAT) family. This family contains proteins with N-acetyltransferase functions such as Elp3-related proteins.
gene_ID=unitig95_27	GT90	Thioredoxin	Thioredoxin. Thioredoxins are small enzymes that participate in redox reactions, via the reversible oxidation of an active centre disulfide bond. Some members with only the active site are not separated from the noise.
gene_ID=unitig95_28	GT90	Thioredoxin	Thioredoxin. Thioredoxins are small enzymes that participate in redox reactions, via the reversible oxidation of an active centre disulfide bond. Some members with only the active site are not separated from the noise.
gene_ID=unitig95_41	GT48	Sugar_tr	Sugar (and other) transporter.
gene_ID=unitig95_42	CE1	Esterase	Putative esterase. This family contains Esterase D. However it is not clear if all members of the family have the same function. This family is related to the pfam00135 family.
gene_ID=unitig95_44	CBM51	LIP	Secretory lipase. These lipases are expressed and secreted during the infection cycle of these pathogens. In particular, C. albicans has a large number of different lipases, possibly reflecting broad lipolytic activity, which may contribute to the persistence and virulence of C. albicans in human tissue.
gene_ID=unitig96_5	GT1	DAGAT	Diacylglycerol acyltransferase. The terminal step of triacylglycerol (TAG) formation is catalyzed by the enzyme diacylglycerol acyltransferase (DAGAT).
gene_ID=unitig96_13	GT48	AA_permease/AA_permease_2	Amino acid permease. /Amino acid permease.
gene_ID=unitig96_14	GT48	AA_permease/AA_permease_2	Amino acid permease. /Amino acid permease.
gene_ID=unitig96_17	GT71	Mannosyl_trans3	Mannosyltransferase putative. This family is conserved in fungi. Several members are annotated as being alpha-1,3-mannosyltransferase but this could not be confirmed.
gene_ID=unitig96_18	CE1	Prenyltrans_2/Prenyltrans_2	Prenyltransferase-like. /Prenyltransferase-like.
gene_ID=unitig98_2	GT2	tRNA-synt_1e/tRNA-synt_1e	tRNA synthetases class I (C) catalytic domain. This family includes only cysteinyl tRNA synthetases./tRNA synthetases class I (C) catalytic domain. This family includes only cysteinyl tRNA synthetases.
gene_ID=unitig98_6	GT48	Sugar_tr	Sugar (and other) transporter.
gene_ID=unitig99_10	GT25	TPT	Triose-phosphate Transporter family. This family includes transporters with a specificity for triose phosphate.
gene_ID=unitig99_17	GT48	AA_permease/AA_permease_2	Amino acid permease. /Amino acid permease.
gene_ID=unitig99_28	GH5	Cellulase	Cellulase (glycosyl hydrolase family 5).
gene_ID=unitig99_39	GT91	DUF3589	Protein of unknown function (DUF3589). This family of proteins is found in eukaryotes. Proteins in this family are typically between 541 and 717 amino acids in length. The function of this family is not known,
gene_ID=unitig101_2	GT2	tRNA-synt_1e/tRNA-synt_1e	tRNA synthetases class I (C) catalytic domain. This family includes only cysteinyl tRNA synthetases./tRNA synthetases class I (C) catalytic domain. This family includes only cysteinyl tRNA synthetases.
gene_ID=unitig101_7	GT2	Chitin_synth_2/Glyco_trans_2_3	Chitin synthase. Members of this family are fungal chitin synthase EC:2.4.1.16 enzymes. They catalyze chitin synthesis as follows: UDP-N-acetyl-D-glucosamine + {(1,4)-(N-acetyl-beta-D-glucosaminyl)}(N) <=> UDP + {(1,4)-(N-acetyl-beta-D-glucosaminyl)}(N+1)./Glycosyl transferase family group 2. Members of this family of prokaryotic proteins include putative glucosyltransferases, which are involved …
gene_ID=unitig101_15	GT66	STT3	Oligosaccharyl transferase STT3 subunit. This family consists of the oligosaccharyl transferase STT3 subunit and related proteins. The STT3 subunit is part of the oligosaccharyl transferase (OTase) complex of proteins and is required for its activity. In eukaryotes, OTase transfers a lipid-linked core-oligosaccharide to selected asparagine residues in the ER. In the archaea STT3 occurs alone, rat…
gene_ID=unitig101_34	GT62	Anp1	Anp1. The members of this family (Anp1, Van1 and Mnn9) are membrane proteins required for proper Golgi function. These proteins co-localise within the cis Golgi, and that they are physically associated in two distinct complexes.
gene_ID=unitig101_36	GT48	Sugar_tr/MFS_1	Sugar (and other) transporter. /Major Facilitator Superfamily.
gene_ID=unitig101_49	CBM13	HSP70	Hsp70 protein. Hsp70 chaperones help to fold many proteins. Hsp70 assisted folding involves repeated cycles of substrate binding and release. Hsp70 activity is ATP dependent. Hsp70 proteins are made up of two regions: the amino terminus is the ATPase domain and the carboxyl terminus is the substrate binding region.
gene_ID=unitig101_61	GT47	Adenylsucc_synt	Adenylosuccinate synthetase.
gene_ID=unitig101_62	GT22	Glyco_transf_22	Alg9-like mannosyltransferase family. Members of this family are mannosyltransferase enzymes. At least some members are localised in endoplasmic reticulum and involved in GPI anchor biosynthesis.
gene_ID=unitig101_66	GH72	MMR_HSR1/TGS	50S ribosome-binding GTPase. The full-length GTPase protein is required for the complete activity of the protein of interacting with the 50S ribosome and binding of both adenine and guanine nucleotides, with a preference for guanine nucleotide./TGS domain. The TGS domain is named after ThrRS, GTPase, and SpoT. Interestingly, TGS domain was detected also at the amino terminus of the uridine kinase…
gene_ID=unitig102_2	GT34	p450	Cytochrome P450. Cytochrome P450s are haem-thiolate proteins involved in the oxidative degradation of various compounds. They are particularly well known for their role in the degradation of environmental toxins and mutagens. They can be divided into 4 classes, according to the method by which electrons from NAD(P)H are delivered to the catalytic site. Sequence conservation is relatively low with…	general topography and structural fold are highly conserved. The conserved core is composed of a coil termed the 'meander', a four-helix bundle, helices J and K, and two sets of beta-sheets. These constitute the haem-binding loop (with an absolutely conserved cysteine that serves as the 5th ligand for the haem iron), the proton-transfer groove and the absolutely conserved EXXR motif in helix K. W…	general enzymatic function is to catalyze regiospecific and stereospecific oxidation of non-activated hydrocarbons at physiological temperatures.
gene_ID=unitig102_8_partial	GT48	MFS_1	Major Facilitator Superfamily.
gene_ID=unitig104_1	GT2	Glyco_tranf_2_3/Glyco_transf_21	Glycosyltransferase like family 2. Members of this family of prokaryotic proteins include putative glucosyltransferase, which are involved in bacterial capsule biosynthesis./Glycosyl transferase family 21. This is a family of ceramide beta-glucosyltransferases - EC:2.4.1.80.
gene_ID=unitig105_1_partial	GH3	Glyco_hydro_3	Glycosyl hydrolase family 3 N terminal domain.
gene_ID=unitig105_7	GT41	Acetyltransf_1	Acetyltransferase (GNAT) family. This family contains proteins with N-acetyltransferase functions such as Elp3-related proteins.
gene_ID=unitig105_11	GT4	Amino_oxidase	Flavin containing amine oxidoreductase. This family consists of various amine oxidases, including maze polyamine oxidase (PAO) and various flavin containing monoamine oxidases (MAO). The aligned region includes the flavin binding site of these enzymes. The family also contains phytoene dehydrogenases and related enzymes. In vertebrates MAO plays an important role regulating the intracellular leve…
gene_ID=unitig105_15	GH72	Glyco_hydro_72	Glucanosyltransferase. This is a family of glycosylphosphatidylinositol-anchored beta(-13)glucanosyltransferases. The active site residues in the Aspergillus fumigatus example are the two glutamate residues at 160 and 261.
gene_ID=unitig105_21	GT50	Cyclin_N	Cyclin, N-terminal domain. Cyclins regulate cyclin dependent kinases (CDKs). Human cyclin-O is a Uracil-DNA glycosylase that is related to other cyclins. Cyclins contain two domains of similar all-alpha fold, of which this family corresponds with the N-terminal domain.
gene_ID=unitig105_29	AA10	Rad60-SLD	Ubiquitin-2 like Rad60 SUMO-like. The small ubiquitin-related modifier SUMO-1 is a Ub/Ubl family member, and although SUMO-1 shares structural similarity to Ub, SUMO's cellular functions remain distinct insomuch as SUMO modification alters protein function through changes in activity, cellular localisation, or by protecting substrates from ubiquitination. Rad60 family members contain functionally…
gene_ID=unitig105_35	CE9	Amidohydro_1	Amidohydrolase family. This family of enzymes are a a large metal dependent hydrolase superfamily. The family includes Adenine deaminase EC:3.5.4.2 that hydrolyses adenine to form hypoxanthine and ammonia. Adenine deaminases reaction is important for adenine utilisation as a purine and also as a nitrogen source. This family also includes dihydroorotase and N-acetylglucosamine-6-phosphate deacetyl…
gene_ID=unitig105_38	GH32	Ferric_reduct/FAD_binding_8/NAD_binding_6	Ferric reductase like transmembrane component. This family includes a common region in the transmembrane proteins mammalian cytochrome B-245 heavy chain (gp9-1phox), ferric reductase transmembrane component in yeast and respiratory burst oxidase from mouse-ear cress. This may be a family of flavocytochromes capable of moving electrons across the plasma membrane. The Frp1 protein from S. pombe is …	gene codes for the beta chain of cytochrome B-245 and cytochrome B-245 is missing from patients with the disease./FAD-binding domain. /Ferric reductase NAD binding domain.
gene_ID=unitig105_40	GH12	Peptidase_M16/Peptidase_M16_C/Sec1	Insulinase (Peptidase family M16). /Peptidase M16 inactive domain. Peptidase M16 consists of two structurally related domains. One is the active peptidase, whereas the other is inactive. The two domains hold the substrate like a clamp./Sec1 family.
gene_ID=unitig105_42	AA7	FAD_binding_4/ALO	FAD binding domain. This family consists of various enzymes that use FAD as a co-factor, most of the enzymes are similar to oxygen oxidoreductase. One of the enzymes Vanillyl-alcohol oxidase (VAO) has a solved structure, the alignment includes the FAD binding site, called the PP-loop, between residues 99-110. The FAD molecule is covalently bound in the known structure, however the residue that li…
gene_ID=unitig105_48	GT4	Amino_oxidase	Flavin containing amine oxidoreductase. This family consists of various amine oxidases, including maze polyamine oxidase (PAO) and various flavin containing monoamine oxidases (MAO). The aligned region includes the flavin binding site of these enzymes. The family also contains phytoene dehydrogenases and related enzymes. In vertebrates MAO plays an important role regulating the intracellular leve…
gene_ID=unitig105_60	GH18	Redoxin	Redoxin. This family of redoxins includes peroxiredoxin, thioredoxin and glutaredoxin proteins.
gene_ID=unitig105_73	GT50	Cyclin_N/Cyclin_C/MAM33	Cyclin, N-terminal domain. Cyclins regulate cyclin dependent kinases (CDKs). Human cyclin-O is a Uracil-DNA glycosylase that is related to other cyclins. Cyclins contain two domains of similar all-alpha fold, of which this family corresponds with the N-terminal domain./Cyclin, C-terminal domain. Cyclins regulate cyclin dependent kinases (CDKs). Human CCNO is a Uracil-DNA glycosylase that is relat…
gene_ID=unitig105_80	CE11	DEAD/Helicase_C	DEAD/DEAH box helicase. Members of this family include the DEAD and DEAH box helicases. Helicases are involved in unwinding nucleic acids. The DEAD box helicases are involved in various aspects of RNA metabolism, including nuclear transcription, pre mRNA splicing, ribosome bio_	genesis, nucleocytoplasmic transport, translation, RNA decay and organellar _	gene expression./Helicase conserved C-terminal domain. The Prosite family is restricted to DEAD/H helicases, whereas this domain family is found in a wide variety of helicases and helicase related proteins. It may be that this is not an autonomously folding unit, but an integral part of the helicase.
gene_ID=unitig105_81	GT1	FYVE	FYVE zinc finger. The FYVE zinc finger is named after four proteins that it has been found in: Fab1, YOTB/ZK632.12, Vac1, and EEA1. The FYVE finger has been shown to bind two Zn++ ions. The FYVE finger has eight potential zinc coordinating cysteine positions. Many members of this family also include two histidines in a motif R+HHC+XCG, where + represents a charged residue and X any residue. We ha…
gene_ID=unitig105_82	GT34	p450	Cytochrome P450. Cytochrome P450s are haem-thiolate proteins involved in the oxidative degradation of various compounds. They are particularly well known for their role in the degradation of environmental toxins and mutagens. They can be divided into 4 classes, according to the method by which electrons from NAD(P)H are delivered to the catalytic site. Sequence conservation is relatively low with…	general topography and structural fold are highly conserved. The conserved core is composed of a coil termed the 'meander', a four-helix bundle, helices J and K, and two sets of beta-sheets. These constitute the haem-binding loop (with an absolutely conserved cysteine that serves as the 5th ligand for the haem iron), the proton-transfer groove and the absolutely conserved EXXR motif in helix K. W…	general enzymatic function is to catalyze regiospecific and stereospecific oxidation of non-activated hydrocarbons at physiological temperatures.
gene_ID=unitig105_99	GT48	MFS_1	Major Facilitator Superfamily.
gene_ID=unitig105_104	GT4	Abhydrolase_6/Abhydrolase_1	Alpha/beta hydrolase family. This family contains alpha/beta hydrolase enzymes of diverse specificity./alpha/beta hydrolase fold. This catalytic domain is found in a very wide range of enzymes.
gene_ID=unitig107_3	GH28	Zn_clus/Fungal_trans	Fungal Zn(2)-Cys(6) binuclear cluster domain. /Fungal specific transcription factor domain.
gene_ID=unitig107_4	CE14	PIG-L	GlcNAc-PI de-N-acetylase. Members of this family are related to PIG-L an N-acetylglucosaminylphosphatidylinositol de-N-acetylase (EC:3.5.1.89) that catalyzes the second step in GPI biosynthesis.
gene_ID=unitig107_12	CE11	DEAD/Helicase_C/ECH	DEAD/DEAH box helicase. Members of this family include the DEAD and DEAH box helicases. Helicases are involved in unwinding nucleic acids. The DEAD box helicases are involved in various aspects of RNA metabolism, including nuclear transcription, pre mRNA splicing, ribosome bio_	genesis, nucleocytoplasmic transport, translation, RNA decay and organellar _	gene expression./Helicase conserved C-terminal domain. The Prosite family is restricted to DEAD/H helicases, whereas this domain family is found in a wide variety of helicases and helicase related proteins. It may be that this is not an autonomously folding unit, but an integral part of the helicase./Enoyl-CoA hydratase/isomerase family. This family contains a diverse set of enzymes including: En…
gene_ID=unitig107_13	GT48	AA_permease_2/AA_permease	Amino acid permease. /Amino acid permease.
gene_ID=unitig107_24	GT71	Mannosyl_trans3	Mannosyltransferase putative. This family is conserved in fungi. Several members are annotated as being alpha-1,3-mannosyltransferase but this could not be confirmed.
gene_ID=unitig107_34	GH132	SUN	Beta-glucosidase (SUN family). Members of this family include Nca3, Sun4 and Sim1. This is a family of yeast proteins, involved in a diverse set of functions (DNA replication, aging, mitochondrial bio_	genesis and cell septation). BGLA from Candida wickerhamii has been characterized as a Beta-glucosidase EC:3.2.1.21.
gene_ID=unitig110_9	AA3	Apc9/Pyr_redox_2/Pyr_redox/Pyr_redox_dim	Anaphase-promoting complex subunit 9. Apc9 is one of the subunits of the anaphase-promoting complex, or cyclosome, which is essential for regulating entry into anaphase and exit from mitosis. The APC is a ubiquitin-protein ligase complex. All APC subunits are members of the cullin family proteins, which bind to a ring-finger subunit via a conserved cullin domain. The APC is made up of four parts,…
gene_ID=unitig110_14	GT2/GT4	CMAS/Methyltransf_23	Mycolic acid cyclopropane synthetase. This family consist of Cyclopropane-fatty-acyl-phospholipid synthase or CFA synthase EC:2.1.1.79 this enzyme catalyze the reaction: S-adenosyl-L-methionine + phospholipid olefinic fatty acid <=> S-adenosyl-L-homocysteine + phospholipid cyclopropane fatty acid./Methyltransferase domain. This family appears to be a methyltransferase domain.
gene_ID=unitig110_25	GT48	DUF605	Vta1 like. Vta1 (VPS20-associated protein 1) is a positive regulator of Vps4. Vps4 is an ATPase that is required in the multivesicular body (MVB) sorting pathway to dissociate the endosomal sorting complex required for transport (ESCRT). Vta1 promotes correct assembly of Vps4 and stimulates its ATPase activity through its conserved Vta1/SBP1/LIP5 region.
gene_ID=unitig110_32	GT48	MFS_1	Major Facilitator Superfamily.
gene_ID=unitig110_33	GT9	CTP_transf_2	Cytidylyltransferase. This family includes: Cholinephosphate cytidylyltransferase. Glycerol-3-phosphate cytidylyltransferase.
gene_ID=unitig110_47	GT2	Chitin_synth_1N/Chitin_synth_1/Chitin_synth_2/Glyco_trans_2_3	Chitin synthase N-terminal. This is the N-terminal domain of Chitin synthase (pfam01644)./Chitin synthase. This region is found commonly in chitin synthases classes I, II and III. Chitin a linear homopolymer of GlcNAc residues, it is an important component of the cell wall of fungi and is synthesised on the cytoplasmic surface of the cell membrane by membrane bound chitin synthases./Chitin syntha…
gene_ID=unitig113_4	GT48	Sugar_tr/MFS_1	Sugar (and other) transporter. /Major Facilitator Superfamily.
gene_ID=unitig113_8	CBM35	PBP	Phosphatidylethanolamine-binding protein.
gene_ID=unitig113_11	GT39	PMT/MIR	Dolichyl-phosphate-mannose-protein mannosyltransferase. This is a family of Dolichyl-phosphate-mannose-protein mannosyltransferase proteins EC:2.4.1.109. These proteins are responsible for O-linked glycosylation of proteins, they catalyze the reaction:- Dolichyl phosphate D-mannose + protein <=> dolichyl phosphate + O-D-mannosyl-protein. Also in this family is the Drosophila rotated abdomen prote…
gene_ID=unitig114_2	GT50	Cyclin_N	Cyclin, N-terminal domain. Cyclins regulate cyclin dependent kinases (CDKs). Human cyclin-O is a Uracil-DNA glycosylase that is related to other cyclins. Cyclins contain two domains of similar all-alpha fold, of which this family corresponds with the N-terminal domain.
gene_ID=unitig114_14	GH32	Ferric_reduct/FAD_binding_8/NAD_binding_6	Ferric reductase like transmembrane component. This family includes a common region in the transmembrane proteins mammalian cytochrome B-245 heavy chain (gp9-1phox), ferric reductase transmembrane component in yeast and respiratory burst oxidase from mouse-ear cress. This may be a family of flavocytochromes capable of moving electrons across the plasma membrane. The Frp1 protein from S. pombe is …	gene codes for the beta chain of cytochrome B-245 and cytochrome B-245 is missing from patients with the disease./FAD-binding domain. /Ferric reductase NAD binding domain.
gene_ID=unitig114_23	GT48	MFS_1	Major Facilitator Superfamily.
gene_ID=unitig114_35	GT55	Ank_2/Ank_4/Ank_2	Ankyrin repeats (3 copies). /Ankyrin repeats (many copies). /Ankyrin repeats (3 copies).
gene_ID=unitig114_37	GT2	HATPase_c/HSP90	Histidine kinase-, DNA gyrase B-, and HSP90-like ATPase. This family represents the structurally related ATPase domains of histidine kinase, DNA gyrase B and HSP90./Hsp90 protein.
gene_ID=unitig114_38	GT91	DUF3589	Protein of unknown function (DUF3589). This family of proteins is found in eukaryotes. Proteins in this family are typically between 541 and 717 amino acids in length. The function of this family is not known,
gene_ID=unitig114_39	GT91	DUF3589	Protein of unknown function (DUF3589). This family of proteins is found in eukaryotes. Proteins in this family are typically between 541 and 717 amino acids in length. The function of this family is not known,
gene_ID=unitig115_1	GT2/GT50	Cyclin_N/Myosin_head	Cyclin, N-terminal domain. Cyclins regulate cyclin dependent kinases (CDKs). Human cyclin-O is a Uracil-DNA glycosylase that is related to other cyclins. Cyclins contain two domains of similar all-alpha fold, of which this family corresponds with the N-terminal domain./Myosin head (motor domain).
gene_ID=unitig115_8	GH12	Peptidase_M16/Peptidase_M16_C	Insulinase (Peptidase family M16). /Peptidase M16 inactive domain. Peptidase M16 consists of two structurally related domains. One is the active peptidase, whereas the other is inactive. The two domains hold the substrate like a clamp.
gene_ID=unitig115_10	GT34	p450/GHMP_kinases_N	Cytochrome P450. Cytochrome P450s are haem-thiolate proteins involved in the oxidative degradation of various compounds. They are particularly well known for their role in the degradation of environmental toxins and mutagens. They can be divided into 4 classes, according to the method by which electrons from NAD(P)H are delivered to the catalytic site. Sequence conservation is relatively low with…	general topography and structural fold are highly conserved. The conserved core is composed of a coil termed the 'meander', a four-helix bundle, helices J and K, and two sets of beta-sheets. These constitute the haem-binding loop (with an absolutely conserved cysteine that serves as the 5th ligand for the haem iron), the proton-transfer groove and the absolutely conserved EXXR motif in helix K. W…	general enzymatic function is to catalyze regiospecific and stereospecific oxidation of non-activated hydrocarbons at physiological temperatures./GHMP kinases N terminal domain. This family includes homoserine kinases, galactokinases and mevalonate kinases.
gene_ID=unitig116_9	GT48	MFS_1/ABC_membrane/ABC_tran/ABC_membrane/ABC_tran	Major Facilitator Superfamily. /ABC transporter transmembrane region. This family represents a unit of six transmembrane helices. Many members of the ABC transporter family (pfam00005) have two such regions./ABC transporter. ABC transporters for a large family of proteins responsible for translocation of a variety of compounds across biological membranes. ABC transporters are the largest family o…
gene_ID=unitig117_2	GT87	NUDIX/Radical_SAM	NUDIX domain. /Radical SAM superfamily. Radical SAM proteins catalyze diverse reactions, including unusual methylations, isomerisation, sulphur insertion, ring formation, anaerobic oxidation and protein radical formation.
gene_ID=unitig117_5	GH17	Glyco_hydro_17	Glycosyl hydrolases family 17.
gene_ID=unitig117_8	GH65	Glyco_hydro_65N/Glyco_hydro_65m	Glycosyl hydrolase family 65, N-terminal domain. This family of glycosyl hydrolases contains vacuolar acid trehalase and maltose phosphorylase.Maltose phosphorylase (MP) is a dimeric enzyme that catalyzes the conversion of maltose and inorganic phosphate into beta-D-glucose--1phosphate and glucose. This domain is believed to be essential for catalytic activity although its precise function remain…
gene_ID=unitig117_10	GT22	DUF3445	Protein of unknown function (DUF3445). This family of proteins are functionally uncharacterized. This protein is found in bacteria and eukaryotes. Proteins in this family are typically between 264 to 418 amino acids in length. This protein has a conserved RLP sequence motif. This protein has two completely conserved R residues that may be functionally important.
gene_ID=unitig119_5	AA10	ubiquitin	Ubiquitin family. This family contains a number of ubiquitin-like proteins: SUMO (smt3 homologue), Nedd8, Elongin B, Rub1, and Parkin. A number of them are thought to carry a distinctive five-residue motif termed the proteasome-interacting motif (PIM), which may have a biologically significant role in protein delivery to proteasomes and recruitment of proteasomes to transcription sites.
gene_ID=unitig119_8	CBM21	SUR7	SUR7/PalI family. This family consists of several fungal-specific SUR7 proteins. Its activity regulates expression of RVS161, a homologue of human endophilin, suggesting a function for both in endocytosis. The protein carries four transmembrane domains and is thus likely to act as an anchoring protein for the eisosome to the plasma membrane. Eisosomes are the immobile protein complexes, that incl…
gene_ID=unitig119_12	GT62	Anp1	Anp1. The members of this family (Anp1, Van1 and Mnn9) are membrane proteins required for proper Golgi function. These proteins co-localise within the cis Golgi, and that they are physically associated in two distinct complexes.
gene_ID=unitig119_15	GH10	NmrA	NmrA-like family. NmrA is a negative transcriptional regulator involved in the post-translational modification of the transcription factor AreA. NmrA is part of a system controlling nitrogen metabolite repression in fungi. This family only contains a few sequences as iteration results in significant matches to other Rossmann fold families.
gene_ID=unitig119_24	CBM48	DnaJ/DnaJ-X	DnaJ domain. DnaJ domains (J-domains) are associated with hsp70 heat-shock system and it is thought that this domain mediates the interaction. DnaJ-domain is therefore part of a chaperone (protein folding) system. The T-antigens, although not in Prosite are confirmed as DnaJ containing domains from literature./X-domain of DnaJ-containing. IN certain plant and yeast proteins, the DnaJ-1 proteins h…
gene_ID=unitig119_28	AA4/AA7	FAD_binding_4/FAD-oxidase_C/YL1_C	FAD binding domain. This family consists of various enzymes that use FAD as a co-factor, most of the enzymes are similar to oxygen oxidoreductase. One of the enzymes Vanillyl-alcohol oxidase (VAO) has a solved structure, the alignment includes the FAD binding site, called the PP-loop, between residues 99-110. The FAD molecule is covalently bound in the known structure, however the residue that li…
gene_ID=unitig119_32	CBM51	LIP	Secretory lipase. These lipases are expressed and secreted during the infection cycle of these pathogens. In particular, C. albicans has a large number of different lipases, possibly reflecting broad lipolytic activity, which may contribute to the persistence and virulence of C. albicans in human tissue.
gene_ID=unitig119_33	GH130	FAD_binding_1/NAD_binding_1	FAD binding domain. This domain is found in sulfite reductase, NADPH cytochrome P450 reductase, Nitric oxide synthase and methionine synthase reductase./Oxidoreductase NAD-binding domain. Xanthine dehydrogenases, that also bind FAD/NAD, have essentially no similarity.
gene_ID=unitig119_38	CE1	Esterase	Putative esterase. This family contains Esterase D. However it is not clear if all members of the family have the same function. This family is related to the pfam00135 family.
gene_ID=unitig119_44	GT48	AA_permease_2	Amino acid permease.
gene_ID=unitig119_52	CE11	SNF2_N/Helicase_C	SNF2 family N-terminal domain. This domain is found in proteins involved in a variety of processes including transcription regulation (e.g., SNF2, STH1, brahma, MOT1), DNA repair (e.g. ERCC6, RAD16, RAD5), DNA recombination (e.g. RAD54), and chromatin unwinding (e.g. ISWI) as well as a variety of other proteins with little functional information (e.g. lodestar, ETL1)./Helicase conserved C-termina…
gene_ID=unitig119_68	GT2	Aminotran_3	Aminotransferase class-III.
gene_ID=unitig119_73	CE11	DEAD/Helicase_C	DEAD/DEAH box helicase. Members of this family include the DEAD and DEAH box helicases. Helicases are involved in unwinding nucleic acids. The DEAD box helicases are involved in various aspects of RNA metabolism, including nuclear transcription, pre mRNA splicing, ribosome bio_	genesis, nucleocytoplasmic transport, translation, RNA decay and organellar _	gene expression./Helicase conserved C-terminal domain. The Prosite family is restricted to DEAD/H helicases, whereas this domain family is found in a wide variety of helicases and helicase related proteins. It may be that this is not an autonomously folding unit, but an integral part of the helicase.
gene_ID=unitig122_1_partial	GT2	DUF1729/zf-MaoC/MaoC_dehydratas/Acyl_transf_1	Domain of unknown function (DUF1729). This domain of unknown function is found in fatty acid synthase beta subunits together with the MaoC-like domain (pfam01575) and the Acyltransferase domain (pfam00698). The domain has been identified in fungi and bacteria./Metal-binding domain of MaoC dehydratase. /MaoC like domain. The maoC _	gene is part of a operon with maoA which is involved in the synthesis of monoamine oxidase. The MaoC protein is found to share similarity with a wide variety of enzymes; estradiol 17 beta-dehydrogenase 4, peroxisomal hydratase-dehydrogenase-epimerase, fatty acid synthase beta subunit. Several bacterial proteins that are composed solely of this domain have (R)-specific enoyl-CoA hydratase activity…
gene_ID=unitig122_8	GT4	Abhydro_lipase/Abhydrolase_1	Partial alpha/beta-hydrolase lipase region. This family corresponds to a N-terminal part of an alpha/beta hydrolase domain./alpha/beta hydrolase fold. This catalytic domain is found in a very wide range of enzymes.
gene_ID=unitig122_14	CBM48	DnaJ	DnaJ domain. DnaJ domains (J-domains) are associated with hsp70 heat-shock system and it is thought that this domain mediates the interaction. DnaJ-domain is therefore part of a chaperone (protein folding) system. The T-antigens, although not in Prosite are confirmed as DnaJ containing domains from literature.
gene_ID=unitig122_21	GH32	Ferric_reduct/FAD_binding_8/NAD_binding_6	Ferric reductase like transmembrane component. This family includes a common region in the transmembrane proteins mammalian cytochrome B-245 heavy chain (gp9-1phox), ferric reductase transmembrane component in yeast and respiratory burst oxidase from mouse-ear cress. This may be a family of flavocytochromes capable of moving electrons across the plasma membrane. The Frp1 protein from S. pombe is …	gene codes for the beta chain of cytochrome B-245 and cytochrome B-245 is missing from patients with the disease./FAD-binding domain. /Ferric reductase NAD binding domain.
gene_ID=unitig122_42	GH13	Alpha-amylase	Alpha amylase, catalytic domain. Alpha amylase is classified as family 13 of the glycosyl hydrolases. The structure is an 8 stranded alpha/beta barrel containing the active site, interrupted by a ~70 a.a. calcium-binding domain protruding between beta strand 3 and alpha helix 3, and a carboxyl-terminal Greek key beta-barrel domain.
gene_ID=unitig122_43	GH18	DER1/DUF307/Na_Ca_ex/Na_Ca_ex	Der-1like family. The endoplasmic reticulum (ER) of the yeast Saccharomyces cerevisiae contains of proteolytic system able to selectively degrade misfolded lumenal secretory proteins. For examination of the components involved in this degradation process, mutants were isolated. They could be divided into four complementation groups. The mutations led to stabilisation of two different substrates f…	gene codes for a novel, hydrophobic protein, that is localised to the ER. Deletion of DER1 abolished degradation of the substrate proteins. The function of the Der1 protein seems to be specifically required for the degradation process associated with the ER. Interestingly this family seems distantly related to the Rhomboid family of membrane peptidases. Suggesting that this family may also mediat…
gene_ID=unitig122_61	GH28	Zn_clus	Fungal Zn(2)-Cys(6) binuclear cluster domain.
gene_ID=unitig122_66	GT39	PMT/MIR	Dolichyl-phosphate-mannose-protein mannosyltransferase. This is a family of Dolichyl-phosphate-mannose-protein mannosyltransferase proteins EC:2.4.1.109. These proteins are responsible for O-linked glycosylation of proteins, they catalyze the reaction:- Dolichyl phosphate D-mannose + protein <=> dolichyl phosphate + O-D-mannosyl-protein. Also in this family is the Drosophila rotated abdomen prote…
gene_ID=unitig122_67	GT48	AA_permease_2/AA_permease_2	Amino acid permease. /Amino acid permease.
gene_ID=unitig122_79	CE11	DEAD/Helicase_C	DEAD/DEAH box helicase. Members of this family include the DEAD and DEAH box helicases. Helicases are involved in unwinding nucleic acids. The DEAD box helicases are involved in various aspects of RNA metabolism, including nuclear transcription, pre mRNA splicing, ribosome bio_	genesis, nucleocytoplasmic transport, translation, RNA decay and organellar _	gene expression./Helicase conserved C-terminal domain. The Prosite family is restricted to DEAD/H helicases, whereas this domain family is found in a wide variety of helicases and helicase related proteins. It may be that this is not an autonomously folding unit, but an integral part of the helicase.
gene_ID=unitig122_86	GT2	Chitin_synth_1N/Chitin_synth_1/Chitin_synth_2	Chitin synthase N-terminal. This is the N-terminal domain of Chitin synthase (pfam01644)./Chitin synthase. This region is found commonly in chitin synthases classes I, II and III. Chitin a linear homopolymer of GlcNAc residues, it is an important component of the cell wall of fungi and is synthesised on the cytoplasmic surface of the cell membrane by membrane bound chitin synthases./Chitin syntha…
gene_ID=unitig123_3	GT1	VHS/FYVE	VHS domain. Domain present in VPS-27, Hrs and STAM./FYVE zinc finger. The FYVE zinc finger is named after four proteins that it has been found in: Fab1, YOTB/ZK632.12, Vac1, and EEA1. The FYVE finger has been shown to bind two Zn++ ions. The FYVE finger has eight potential zinc coordinating cysteine positions. Many members of this family also include two histidines in a motif R+HHC+XCG, where + r…
gene_ID=unitig124_9	GT48	AA_permease_2	Amino acid permease.
gene_ID=unitig124_19	GH5	Gln-synt_N/Gln-synt_C	Glutamine synthetase, beta-Grasp domain. /Glutamine synthetase, catalytic domain.
gene_ID=unitig128_2	GT4	ABC_tran/ABC2_membrane/PDR_CDR/ABC2_membrane	ABC transporter. ABC transporters for a large family of proteins responsible for translocation of a variety of compounds across biological membranes. ABC transporters are the largest family of proteins in many completely sequenced bacteria. ABC transporters are composed of two copies of this domain and two copies of a transmembrane domain pfam00664. These four domains may belong to a single polyp…
gene_ID=unitig128_5	AA6	Ribonuc_L-PSP	Endoribonuclease L-PSP. Endoribonuclease active on single-stranded mRNA. Inhibits protein synthesis by cleavage of mRNA. Previously thought to inhibit protein synthesis initiation. This protein may also be involved in the regulation of purine biosynthesis.
gene_ID=unitig128_14	CBM21	CBM_21	Putative phosphatase regulatory subunit. This family consists of several eukaryotic proteins that are thought to be involved in the regulation of glycogen metabolism. For instance, the mouse PTG protein has been shown to interact with glycogen synthase, phosphorylase kinase, phosphorylase a: these three enzymes have key roles in the regulation of glycogen metabolism. PTG also binds the catalytic …
gene_ID=unitig128_25	CBM48	DnaJ	DnaJ domain. DnaJ domains (J-domains) are associated with hsp70 heat-shock system and it is thought that this domain mediates the interaction. DnaJ-domain is therefore part of a chaperone (protein folding) system. The T-antigens, although not in Prosite are confirmed as DnaJ containing domains from literature.
gene_ID=unitig128_61	GH13	dCMP_cyt_deam_1	Cytidine and deoxycytidylate deaminase zinc-binding region.
gene_ID=unitig128_64	GH81	Glyco_hydro_81	Glycosyl hydrolase family 81. Family of eukaryotic beta-1,3-glucanases. Within the Aspergillus fumigatus protein two perfectly conserved Glu residues (E550 or E554) have been proposed as putative nucleophiles of the active site of the Engl1 endoglucanase, while the proton donor would be D475. The endo-beta-1,3-glucanase activity is essential for efficient spore release.
gene_ID=unitig128_66	GH18	tRNA-synt_1/Anticodon_1	tRNA synthetases class I (I, L, M and V). Other tRNA synthetase sub-families are too dissimilar to be included./Anticodon-binding domain of tRNA. This domain is found mainly hydrophobic tRNA synthetases. The domain binds to the anticodon of the tRNA.
gene_ID=unitig128_67	GH18	tRNA-synt_1/tRNA-synt_1g	tRNA synthetases class I (I, L, M and V). Other tRNA synthetase sub-families are too dissimilar to be included./tRNA synthetases class I (M). This family includes methionyl tRNA synthetases.
gene_ID=unitig128_74	GH109	GFO_IDH_MocA	Oxidoreductase family, NAD-binding Rossmann fold. This family of enzymes utilise NADP or NAD. This family is called the GFO/IDH/MOCA family in swiss-prot.
gene_ID=unitig128_82	GH84	Creatinase_N/Peptidase_M24	Creatinase/Prolidase N-terminal domain. This family includes the N-terminal non-catalytic domains from creatinase and prolidase. The exact function of this domain is uncertain./Metallopeptidase family M24. This family contains metallopeptidases. It also contains non-peptidase homologues such as the N terminal domain of Spt16 which is a histone H3-H4 binding module.
gene_ID=unitig128_95	GT48	MFS_1	Major Facilitator Superfamily.
gene_ID=unitig128_96	GT20	Ctr	Ctr copper transporter family. The redox active metal copper is an essential cofactor in critical biological processes such as respiration, iron transport, oxidative stress protection, hormone production, and pigmentation. A widely conserved family of high-affinity copper transport proteins (Ctr proteins) mediates copper uptake at the plasma membrane. A series of clustered methionine residues in …
gene_ID=unitig128_97	GT48	MFS_1	Major Facilitator Superfamily.
gene_ID=unitig128_109	CBM50	Peptidase_M14/Tyr_Deacylase	Zinc carboxypeptidase. /D-Tyr-tRNA(Tyr) deacylase. This family comprises of several D-Tyr-tRNA(Tyr) deacylase proteins. Cell growth inhibition by several d-amino acids can be explained by an in vivo production of d-aminoacyl-tRNA molecules. Escherichia coli and yeast cells express an enzyme, d-Tyr-tRNA(Tyr) deacylase, capable of recycling such d-aminoacyl-tRNA molecules into free tRNA and d-amino…	genes of the above deacylases, the toxicity of d-amino acids increases. Orthologues of the deacylase are found in many cells.
gene_ID=unitig128_117	GH81	Glyco_hydro_81/Amidase	Glycosyl hydrolase family 81. Family of eukaryotic beta-1,3-glucanases. Within the Aspergillus fumigatus protein two perfectly conserved Glu residues (E550 or E554) have been proposed as putative nucleophiles of the active site of the Engl1 endoglucanase, while the proton donor would be D475. The endo-beta-1,3-glucanase activity is essential for efficient spore release./Amidase.
gene_ID=unitig128_118	GT48	MFS_1	Major Facilitator Superfamily.
gene_ID=unitig128_119	CE11	Rad54_N/SNF2_N/HDA2-3/Helicase_C	Rad54 N terminal. This is the N terminal of the DNA repair protein Rad54./SNF2 family N-terminal domain. This domain is found in proteins involved in a variety of processes including transcription regulation (e.g., SNF2, STH1, brahma, MOT1), DNA repair (e.g. ERCC6, RAD16, RAD5), DNA recombination (e.g. RAD54), and chromatin unwinding (e.g. ISWI) as well as a variety of other proteins with little …	generate the activity of the HDA1 histone deacetylase complex. HDA1 interacts with itself and with the HDA2-HDA3 subcomplex to form a probable tetramer and these interactions are necessary for catalytic activity. The HDA1 histone deacetylase complex is responsible for the deacetylation of lysine residues on the N-terminal part of the core histones (H2A, H2B, H3 and H4). Histone deacetylation give…	genetic repression and plays an important role in transcriptional regulation, cell cycle progression and developmental events. HDA2 and HDA3 have a conserved coiled-coil domain towards their C-terminus./Helicase conserved C-terminal domain. The Prosite family is restricted to DEAD/H helicases, whereas this domain family is found in a wide variety of helicases and helicase related proteins. It may…
gene_ID=unitig128_123	GT2	Myosin_head/DIL	Myosin head (motor domain). /DIL domain. The DIL domain has no known function.
gene_ID=unitig128_126	CE9	Amidohydro_1	Amidohydrolase family. This family of enzymes are a a large metal dependent hydrolase superfamily. The family includes Adenine deaminase EC:3.5.4.2 that hydrolyses adenine to form hypoxanthine and ammonia. Adenine deaminases reaction is important for adenine utilisation as a purine and also as a nitrogen source. This family also includes dihydroorotase and N-acetylglucosamine-6-phosphate deacetyl…
gene_ID=unitig128_140	GT48	Sugar_tr	Sugar (and other) transporter.
gene_ID=unitig128_154	GH12	Peptidase_M16	Insulinase (Peptidase family M16).
gene_ID=unitig128_155	GT50	PIG-U	GPI transamidase subunit PIG-U. Many eukaryotic proteins are anchored to the cell surface via glycosylphosphatidylinositol (GPI), which is posttranslationally attached to the carboxyl-terminus by GPI transamidase. The mammalian GPI transamidase is a complex of at least four subunits, GPI8, GAA1, PIG-S, and PIG-T. PIG-U is thought to represent a fifth subunit in this complex and may be involved in…
gene_ID=unitig128_159	GT48	MFS_1	Major Facilitator Superfamily.
gene_ID=unitig128_171	GT48	AA_permease_2/AA_permease	Amino acid permease. /Amino acid permease.
gene_ID=unitig128_177	GH76	ADH_N	Alcohol dehydrogenase GroES-like domain. This is the catalytic domain of alcohol dehydrogenases. Many of them contain an inserted zinc binding domain. This domain has a GroES-like structure.
gene_ID=unitig128_195	GT48	Sugar_tr	Sugar (and other) transporter.
gene_ID=unitig128_196	AA3	GMC_oxred_N/GMC_oxred_C	GMC oxidoreductase. This family of proteins bind FAD as a cofactor./GMC oxidoreductase. This domain found associated with pfam00732.
gene_ID=unitig128_212	CBM51	LIP	Secretory lipase. These lipases are expressed and secreted during the infection cycle of these pathogens. In particular, C. albicans has a large number of different lipases, possibly reflecting broad lipolytic activity, which may contribute to the persistence and virulence of C. albicans in human tissue.
gene_ID=unitig128_214	CE1/GT48	Sugar_tr/MFS_1/Esterase	Sugar (and other) transporter. /Major Facilitator Superfamily. /Putative esterase. This family contains Esterase D. However it is not clear if all members of the family have the same function. This family is related to the pfam00135 family.
gene_ID=unitig128_227	GT90	Thioredoxin	Thioredoxin. Thioredoxins are small enzymes that participate in redox reactions, via the reversible oxidation of an active centre disulfide bond. Some members with only the active site are not separated from the noise.
gene_ID=unitig128_228	GT90	Thioredoxin	Thioredoxin. Thioredoxins are small enzymes that participate in redox reactions, via the reversible oxidation of an active centre disulfide bond. Some members with only the active site are not separated from the noise.
gene_ID=unitig128_232	GT41	Acetyltransf_1	Acetyltransferase (GNAT) family. This family contains proteins with N-acetyltransferase functions such as Elp3-related proteins.
gene_ID=unitig128_244	GH125	DUF1237	Protein of unknown function (DUF1237). This family contains a number of hypothetical proteins of about 450 residues in length. Their function is unknown, and most are bacterial. However, structurally this family is part of the 6 hairpin glycosidase superfamily, suggesting a glycosyl hydrolase function.
gene_ID=unitig128_251	GT48	MFS_1	Major Facilitator Superfamily.
gene_ID=unitig131_2	GT48	Sugar_tr/MFS_1	Sugar (and other) transporter. /Major Facilitator Superfamily.
gene_ID=unitig131_16	GH12/GT50	PIG-U/Peptidase_M16	GPI transamidase subunit PIG-U. Many eukaryotic proteins are anchored to the cell surface via glycosylphosphatidylinositol (GPI), which is posttranslationally attached to the carboxyl-terminus by GPI transamidase. The mammalian GPI transamidase is a complex of at least four subunits, GPI8, GAA1, PIG-S, and PIG-T. PIG-U is thought to represent a fifth subunit in this complex and may be involved in…
gene_ID=unitig131_20	GT48	MFS_1	Major Facilitator Superfamily.
gene_ID=unitig136_10	CE10	DUF2424	Protein of unknown function (DUF2424). This is a family of proteins conserved in yeasts. The function is not known.
gene_ID=unitig136_35	GT48	MFS_1	Major Facilitator Superfamily.
gene_ID=unitig136_44	GH3	ACPS	4'-phosphopantetheinyl transferase superfamily. Members of this family transfers the 4'-phosphopantetheine (4'-PP) moiety from coenzyme A (CoA) to the invariant serine of pfam00550. This post-translational modification renders holo-ACP capable of acyl group activation via thioesterification of the cysteamine thiol of 4'-PP. This superfamily consists of two subtypes: The ACPS type and the Sfp type…
gene_ID=unitig136_52	GT4	Abhydrolase_1	alpha/beta hydrolase fold. This catalytic domain is found in a very wide range of enzymes.
gene_ID=unitig136_53	GH76	ADH_N/ADH_zinc_N	Alcohol dehydrogenase GroES-like domain. This is the catalytic domain of alcohol dehydrogenases. Many of them contain an inserted zinc binding domain. This domain has a GroES-like structure./Zinc-binding dehydrogenase.
gene_ID=unitig136_54	GH76	ADH_N/ADH_zinc_N	Alcohol dehydrogenase GroES-like domain. This is the catalytic domain of alcohol dehydrogenases. Many of them contain an inserted zinc binding domain. This domain has a GroES-like structure./Zinc-binding dehydrogenase.
gene_ID=unitig136_57	GH47	PA/Peptidase_M28/TFR_dimer	PA domain. The PA (Protease associated) domain is found as an insert domain in diverse proteases. The PA domain is also found in a plant vacuolar sorting receptor and members of the RZF family. It has been suggested that this domain forms a lid-like structure that covers the active site in active proteases, and is involved in protein recognition in vacuolar sorting receptors./Peptidase family M28…
gene_ID=unitig136_64	GH20	AP_endonuc_2	Xylose isomerase-like TIM barrel. This TIM alpha/beta barrel structure is found in xylose isomerase and in endonuclease IV (EC:3.1.21.2). This domain is also found in the N termini of bacterial myo-inositol catabolism proteins. These are involved in the myo-inositol catabolism pathway, and is required for growth on myo-inositol in Rhizobium leguminosarum bv. viciae.
gene_ID=unitig136_80	GH32	Ferric_reduct/FAD_binding_8/NAD_binding_6	Ferric reductase like transmembrane component. This family includes a common region in the transmembrane proteins mammalian cytochrome B-245 heavy chain (gp9-1phox), ferric reductase transmembrane component in yeast and respiratory burst oxidase from mouse-ear cress. This may be a family of flavocytochromes capable of moving electrons across the plasma membrane. The Frp1 protein from S. pombe is …	gene codes for the beta chain of cytochrome B-245 and cytochrome B-245 is missing from patients with the disease./FAD-binding domain. /Ferric reductase NAD binding domain.
gene_ID=unitig142_15	GH65	HAD_2	Haloacid dehalogenase-like hydrolase.
gene_ID=unitig142_17	GH84	Peptidase_M24	Metallopeptidase family M24. This family contains metallopeptidases. It also contains non-peptidase homologues such as the N terminal domain of Spt16 which is a histone H3-H4 binding module.
gene_ID=unitig142_27	GH32	Ferric_reduct/FAD_binding_8/NAD_binding_6/Ferric_reduct/FAD_binding_8/NAD_binding_6	Ferric reductase like transmembrane component. This family includes a common region in the transmembrane proteins mammalian cytochrome B-245 heavy chain (gp9-1phox), ferric reductase transmembrane component in yeast and respiratory burst oxidase from mouse-ear cress. This may be a family of flavocytochromes capable of moving electrons across the plasma membrane. The Frp1 protein from S. pombe is …	gene codes for the beta chain of cytochrome B-245 and cytochrome B-245 is missing from patients with the disease./FAD-binding domain. /Ferric reductase NAD binding domain. /Ferric reductase like transmembrane component. This family includes a common region in the transmembrane proteins mammalian cytochrome B-245 heavy chain (gp9-1phox), ferric reductase transmembrane component in yeast and respir…	gene codes for the beta chain of cytochrome B-245 and cytochrome B-245 is missing from patients with the disease./FAD-binding domain. /Ferric reductase NAD binding domain.
gene_ID=unitig142_29	CE4	Polysacc_deac_1	Polysaccharide deacetylase. This domain is found in polysaccharide deacetylase. This family of polysaccharide deacetylases includes NodB (nodulation protein B from Rhizobium) which is a chitooligosaccharide deacetylase. It also includes chitin deacetylase from yeast, and endoxylanases which hydrolyses glucosidic bonds in xylan.
gene_ID=unitig142_30	AA6	FMN_red	NADPH-dependent FMN reductase.
gene_ID=unitig142_31	AA6	Flavodoxin_1/FMN_red	Flavodoxin. /NADPH-dependent FMN reductase.
gene_ID=unitig142_34	GH55	Cupin_8	Cupin-like domain. This cupin like domain shares similarity to the JmjC domain.
gene_ID=unitig142_43	GT41	TPR_11/TPR_11	TPR repeat. /TPR repeat.
gene_ID=unitig142_52	GH13	PseudoU_synth_2/dCMP_cyt_deam_1	RNA pseudouridylate synthase. Members of this family are involved in modifying bases in RNA molecules. They carry out the conversion of uracil bases to pseudouridine. This family includes RluD, a pseudouridylate synthase that converts specific uracils to pseudouridine in 23S rRNA. RluA from E. coli converts bases in both rRNA and tRNA./Cytidine and deoxycytidylate deaminase zinc-binding region.
gene_ID=unitig142_61	GT24	UDP-g_GGTase	UDP-glucose:Glycoprotein Glucosyltransferase. The N-terminal region of this group of proteins is required for correct folding of the ER UDP-Glc: glucosyltransferase.
gene_ID=unitig143_2	GT48	MFS_1	Major Facilitator Superfamily.
gene_ID=unitig146_1_partial	GT48	MFS_1	Major Facilitator Superfamily.
gene_ID=unitig146_3	CBM6	Phosphodiest	Type I phosphodiesterase / nucleotide pyrophosphatase. This family consists of phosphodiesterases, including human plasma-cell membrane glycoprotein PC-1 / alkaline phosphodiesterase i / nucleotide pyrophosphatase (nppase). These enzymes catalyze the cleavage of phosphodiester and phosphosulfate bonds in NAD, deoxynucleotides and nucleotide sugars. Also in this family is ATX an autotaxin, tumour …
gene_ID=unitig146_5	GT48	MFS_1/MFS_1/MFS_1	Major Facilitator Superfamily. /Major Facilitator Superfamily. /Major Facilitator Superfamily.
gene_ID=unitig146_6	GT4	Abhydrolase_6/Abhydrolase_1	Alpha/beta hydrolase family. This family contains alpha/beta hydrolase enzymes of diverse specificity./alpha/beta hydrolase fold. This catalytic domain is found in a very wide range of enzymes.
gene_ID=unitig146_13	GH85	DUF862	PPPDE putative peptidase domain. The PPPDE superfamily (after Permuted Papain fold Peptidases of DsRNA viruses and Eukaryotes), consists of predicted thiol peptidases with a circularly permuted papain-like fold. The inference of the likely DUB function of the PPPDE superfamily proteins is based on the fusions of the catalytic domain to Ub-binding PUG (PUB)/UBA domains and a novel alpha-helical Ub…
gene_ID=unitig146_29	GT48	MFS_1	Major Facilitator Superfamily.
gene_ID=unitig146_30	GT48	MFS_1/Sugar_tr/MFS_1	Major Facilitator Superfamily. /Sugar (and other) transporter. /Major Facilitator Superfamily.
gene_ID=unitig146_31	GH5	Cellulase	Cellulase (glycosyl hydrolase family 5).
gene_ID=unitig146_32	GH3	Glyco_hydro_3/Glyco_hydro_3_C/Fn3-like	Glycosyl hydrolase family 3 N terminal domain. /Glycosyl hydrolase family 3 C-terminal domain. This domain is involved in catalysis and may be involved in binding beta-glucan. This domain is found associated with pfam00933./Fibronectin type III-like domain. This domain has a fibronectin type III-like structure. It is often found in association with pfam00933 and pfam01915. Its function is unknown.
gene_ID=unitig146_44	GH84	AMP_N/Peptidase_M24	Aminopeptidase P, N-terminal domain. This domain is structurally very similar to the creatinase N-terminal domain (pfam01321). However, little or no sequence similarity exists between the two families./Metallopeptidase family M24. This family contains metallopeptidases. It also contains non-peptidase homologues such as the N terminal domain of Spt16 which is a histone H3-H4 binding module.
gene_ID=unitig146_49	GT48	Sugar_tr/MFS_1	Sugar (and other) transporter. /Major Facilitator Superfamily.
gene_ID=unitig146_55	CE11	PP2C/DEAD/Helicase_C	Protein phosphatase 2C. Protein phosphatase 2C is a Mn++ or Mg++ dependent protein serine/threonine phosphatase./DEAD/DEAH box helicase. Members of this family include the DEAD and DEAH box helicases. Helicases are involved in unwinding nucleic acids. The DEAD box helicases are involved in various aspects of RNA metabolism, including nuclear transcription, pre mRNA splicing, ribosome bio_	genesis, nucleocytoplasmic transport, translation, RNA decay and organellar _	gene expression./Helicase conserved C-terminal domain. The Prosite family is restricted to DEAD/H helicases, whereas this domain family is found in a wide variety of helicases and helicase related proteins. It may be that this is not an autonomously folding unit, but an integral part of the helicase.
gene_ID=unitig146_63	GT48	AA_permease_2/AA_permease/SET	Amino acid permease. /Amino acid permease. /SET domain. SET domains are protein lysine methyltransferase enzymes. SET domains appear to be protein-protein interaction domains. It has been demonstrated that SET domains mediate interactions with a family of proteins that display similarity with dual-specificity phosphatases (dsPTPases). A subset of SET domains have been called PR domains. These dom…
gene_ID=unitig146_64	GT48	AA_permease/AA_permease_2	Amino acid permease. /Amino acid permease.
gene_ID=unitig146_66	CBM13	HSP70/MreB_Mbl	Hsp70 protein. Hsp70 chaperones help to fold many proteins. Hsp70 assisted folding involves repeated cycles of substrate binding and release. Hsp70 activity is ATP dependent. Hsp70 proteins are made up of two regions: the amino terminus is the ATPase domain and the carboxyl terminus is the substrate binding region./MreB/Mbl protein. This family consists of bacterial MreB and Mbl proteins as well …
gene_ID=unitig146_70	CE11	DEAD/Helicase_C/DUF1998	DEAD/DEAH box helicase. Members of this family include the DEAD and DEAH box helicases. Helicases are involved in unwinding nucleic acids. The DEAD box helicases are involved in various aspects of RNA metabolism, including nuclear transcription, pre mRNA splicing, ribosome bio_	genesis, nucleocytoplasmic transport, translation, RNA decay and organellar _	gene expression./Helicase conserved C-terminal domain. The Prosite family is restricted to DEAD/H helicases, whereas this domain family is found in a wide variety of helicases and helicase related proteins. It may be that this is not an autonomously folding unit, but an integral part of the helicase./Domain of unknown function (DUF1998). This family of proteins are functionally uncharacterized. T…
gene_ID=unitig146_71	GT31	Adaptin_N	Adaptin N terminal region. This family consists of the N terminal region of various alpha, beta and gamma subunits of the AP-1, AP-2 and AP-3 adaptor protein complexes. The adaptor protein (AP) complexes are involved in the formation of clathrin-coated pits and vesicles. The N-terminal region of the various adaptor proteins (APs) is constant by comparison to the C-terminal which is variable withi…
gene_ID=unitig146_84	GT48	AA_permease/AA_permease_2	Amino acid permease. /Amino acid permease.
gene_ID=unitig146_98	GT66	Pro_isomerase	Cyclophilin type peptidyl-prolyl cis-trans isomerase/CLD. The peptidyl-prolyl cis-trans isomerases, also known as cyclophilins, share this domain of about 109 amino acids. Cyclophilins have been found in all organisms studied so far and catalyze peptidyl-prolyl isomerisation during which the peptide bond preceding proline (the peptidyl-prolyl bond) is stabilised in the cis conformation. Mammalian…
gene_ID=unitig146_105	GH3/GT2/GH92	adh_short_C2/ketoacyl-synt/ACPS	Enoyl-(Acyl carrier protein) reductase. /Beta-ketoacyl synthase, N-terminal domain. The structure of beta-ketoacyl synthase is similar to that of the thiolase family (pfam00108) and also chalcone synthase. The active site of beta-ketoacyl synthase is located between the N and C-terminal domains. The N-terminal domain contains most of the structures involved in dimer formation and also the active …
gene_ID=unitig147_3	AA6	FMN_red	NADPH-dependent FMN reductase.
gene_ID=unitig147_10	GT48	MFS_1	Major Facilitator Superfamily.
gene_ID=unitig147_15	GH76	ADH_N/ADH_zinc_N	Alcohol dehydrogenase GroES-like domain. This is the catalytic domain of alcohol dehydrogenases. Many of them contain an inserted zinc binding domain. This domain has a GroES-like structure./Zinc-binding dehydrogenase.
gene_ID=unitig147_25	CE11	Helicase_C/HA2/OB_NTP_bind	Helicase conserved C-terminal domain. The Prosite family is restricted to DEAD/H helicases, whereas this domain family is found in a wide variety of helicases and helicase related proteins. It may be that this is not an autonomously folding unit, but an integral part of the helicase./Helicase associated domain (HA2). This presumed domain is about 90 amino acid residues in length. It is found is a…
gene_ID=unitig147_29	CE11	Helicase_C_3/SNF2_N/Helicase_C	Helicase conserved C-terminal domain. This domain family is found in a wide variety of helicases and helicase-related proteins./SNF2 family N-terminal domain. This domain is found in proteins involved in a variety of processes including transcription regulation (e.g., SNF2, STH1, brahma, MOT1), DNA repair (e.g. ERCC6, RAD16, RAD5), DNA recombination (e.g. RAD54), and chromatin unwinding (e.g. ISW…
gene_ID=unitig147_39	AA1	Cu-oxidase_3/Cu-oxidase/Cu-oxidase_2	Multicopper oxidase. This entry contains many divergent copper oxidase-like domains that are not recognised by the pfam00394 model./Multicopper oxidase. Many of the proteins in this family contain multiple similar copies of this plastocyanin-like domain./Multicopper oxidase. This entry contains many divergent copper oxidase-like domains that are not recognised by the pfam00394 model.
gene_ID=unitig149_1	GT1	Anillin/PH	Cell division protein anillin. Anillin is a protein involved in septin organisation during cell division. It is an actin binding protein that is localised to the cleavage furrow, and it maintains the localisation of active myosin, which ensures the spatial control of concerted contraction during cytokinesis./PH domain. PH stands for pleckstrin homology.
gene_ID=unitig150_4	GH92/CE4	adh_short/adh_short_C2/Peptidase_C14	short chain dehydrogenase. This family contains a wide variety of dehydrogenases./Enoyl-(Acyl carrier protein) reductase. /Caspase domain.
gene_ID=unitig150_5	CBM48	DnaJ/DUF1977	DnaJ domain. DnaJ domains (J-domains) are associated with hsp70 heat-shock system and it is thought that this domain mediates the interaction. DnaJ-domain is therefore part of a chaperone (protein folding) system. The T-antigens, although not in Prosite are confirmed as DnaJ containing domains from literature./Domain of unknown function (DUF1977). Members of this family of functionally uncharacte…
gene_ID=unitig151_3	AA3	GMC_oxred_N/GMC_oxred_C	GMC oxidoreductase. This family of proteins bind FAD as a cofactor./GMC oxidoreductase. This domain found associated with pfam00732.
gene_ID=unitig151_4	GT48	Sugar_tr	Sugar (and other) transporter.
gene_ID=unitig151_22	GH76	ADH_zinc_N	Zinc-binding dehydrogenase.
gene_ID=unitig151_29	GT48	MFS_1	Major Facilitator Superfamily.
gene_ID=unitig151_30	GT48	AA_permease_2/AA_permease	Amino acid permease. /Amino acid permease.
gene_ID=unitig152_4	CE11	DBINO/SNF2_N/Helicase_C	DNA-binding domain. DBINO is a DNA-binding domain found on global transcription activator SNF2L1 proteins and chromatin re-modelling proteins./SNF2 family N-terminal domain. This domain is found in proteins involved in a variety of processes including transcription regulation (e.g., SNF2, STH1, brahma, MOT1), DNA repair (e.g. ERCC6, RAD16, RAD5), DNA recombination (e.g. RAD54), and chromatin unwi…
gene_ID=unitig152_13	GT71	Mannosyl_trans3	Mannosyltransferase putative. This family is conserved in fungi. Several members are annotated as being alpha-1,3-mannosyltransferase but this could not be confirmed.
gene_ID=unitig152_15	GH3	Beta-lactamase	Beta-lactamase. This family appears to be distantly related to pfam00905 and PF00768 D-alanyl-D-alanine carboxypeptidase.
gene_ID=unitig152_21	GT15	Glyco_transf_15	Glycolipid 2-alpha-mannosyltransferase. This is a family of alpha-1,2 mannosyl-transferases involved in N-linked and O-linked glycosylation of proteins. Some of the enzymes in this family have been shown to be involved in O- and N-linked glycan modifications in the Golgi.
gene_ID=unitig152_32	GH72	MMR_HSR1	50S ribosome-binding GTPase. The full-length GTPase protein is required for the complete activity of the protein of interacting with the 50S ribosome and binding of both adenine and guanine nucleotides, with a preference for guanine nucleotide.
gene_ID=unitig152_33	CE10	FMO-like/FMO-like/Arf	Flavin-binding monooxygenase-like. This family includes FMO proteins, cyclohexanone mono-oxygenase and a number of different mono-oxygenases./Flavin-binding monooxygenase-like. This family includes FMO proteins, cyclohexanone mono-oxygenase and a number of different mono-oxygenases./ADP-ribosylation factor family. Pfam combines a number of different Prosite families together
gene_ID=unitig152_42	GT90	Thioredoxin/Thioredoxin_2/PITH	Thioredoxin. Thioredoxins are small enzymes that participate in redox reactions, via the reversible oxidation of an active centre disulfide bond. Some members with only the active site are not separated from the noise./Thioredoxin-like domain. /PITH domain. This family was formerly known as DUF1000. The full-length, Txnl1, protein which is a probable component of the 26S proteasome, uses its C-te…
gene_ID=unitig152_48	GT90	Thioredoxin/Glutaredoxin	Thioredoxin. Thioredoxins are small enzymes that participate in redox reactions, via the reversible oxidation of an active centre disulfide bond. Some members with only the active site are not separated from the noise./Glutaredoxin.
gene_ID=unitig153_3	GH28	Zn_clus	Fungal Zn(2)-Cys(6) binuclear cluster domain.
gene_ID=unitig153_4	GT48	HlyIII/Sugar_tr/MFS_1	Haemolysin-III related. Members of this family are integral membrane proteins. This family includes a protein with hemolytic activity from Bacillus cereus. It has been proposed that YOL002c encodes a Saccharomyces cerevisiae protein that plays a key role in metabolic pathways that regulate lipid and phosphate metabolism. In eukaryotes, members are seven-transmembrane pass molecules found to encod…
gene_ID=unitig153_8	GH72	NGP1NT/MMR_HSR1	NGP1NT (NUC091) domain. This N terminal domain is found in a subfamily of hypothetical nucleolar GTP-binding proteins similar to human NGP1./50S ribosome-binding GTPase. The full-length GTPase protein is required for the complete activity of the protein of interacting with the 50S ribosome and binding of both adenine and guanine nucleotides, with a preference for guanine nucleotide.
gene_ID=unitig153_14	CBM51	LIP	Secretory lipase. These lipases are expressed and secreted during the infection cycle of these pathogens. In particular, C. albicans has a large number of different lipases, possibly reflecting broad lipolytic activity, which may contribute to the persistence and virulence of C. albicans in human tissue.
gene_ID=unitig153_23	GH72/CBM43	Glyco_hydro_72/X8	Glucanosyltransferase. This is a family of glycosylphosphatidylinositol-anchored beta(-13)glucanosyltransferases. The active site residues in the Aspergillus fumigatus example are the two glutamate residues at 160 and 261./X8 domain. The X8 domain domain contains at least 6 conserved cysteine residues that presumably form three disulphide bridges. The domain is found in an Olive pollen allergen a…
gene_ID=unitig153_32	GH72	GN3L_Grn1/MMR_HSR1	GNL3L/Grn1 putative GTPase. Grn1 (yeast) and GNL3L (human) are putative GTPases which are required for growth and play a role in processing of nucleolar pre-rRNA. This family contains a potential nuclear localisation signal./50S ribosome-binding GTPase. The full-length GTPase protein is required for the complete activity of the protein of interacting with the 50S ribosome and binding of both aden…
gene_ID=unitig153_35	CE11	DEAD/Helicase_C	DEAD/DEAH box helicase. Members of this family include the DEAD and DEAH box helicases. Helicases are involved in unwinding nucleic acids. The DEAD box helicases are involved in various aspects of RNA metabolism, including nuclear transcription, pre mRNA splicing, ribosome bio_	genesis, nucleocytoplasmic transport, translation, RNA decay and organellar _	gene expression./Helicase conserved C-terminal domain. The Prosite family is restricted to DEAD/H helicases, whereas this domain family is found in a wide variety of helicases and helicase related proteins. It may be that this is not an autonomously folding unit, but an integral part of the helicase.
gene_ID=unitig153_40	GT57	Alg6_Alg8	ALG6, ALG8 glycosyltransferase family. N-linked (asparagine-linked) glycosylation of proteins is mediated by a highly conserved pathway in eukaryotes, in which a lipid (dolichol phosphate)-linked oligosaccharide is assembled at the endoplasmic reticulum membrane prior to the transfer of the oligosaccharide moiety to the target asparagine residues. This oligosaccharide is composed of Glc(3)Man(9)G…	gene, a C->T transition, which causes Ala333 to be replaced with Val, has been identified as the cause of a congenital disorder of glycosylation, designated as type Ic OMIM:603147.
gene_ID=unitig153_42	GT90	A_deamin	Adenosine-deaminase (editase) domain. Adenosine deaminases acting on RNA (ADARs) can deaminate adenosine to form inosine. In long double-stranded RNA, this process is non-specific; it occurs site-specifically in RNA transcripts. The former is important in defence against viruses, whereas the latter may affect splicing or untranslated regions. They are primarily nuclear proteins, but a longer isof…
gene_ID=unitig153_50	CE11	SNF2_N/Helicase_C	SNF2 family N-terminal domain. This domain is found in proteins involved in a variety of processes including transcription regulation (e.g., SNF2, STH1, brahma, MOT1), DNA repair (e.g. ERCC6, RAD16, RAD5), DNA recombination (e.g. RAD54), and chromatin unwinding (e.g. ISWI) as well as a variety of other proteins with little functional information (e.g. lodestar, ETL1)./Helicase conserved C-termina…
gene_ID=unitig153_69	GT15	Sds3	Sds3-like. Repression of _	gene transcription is mediated by histone deacetylases containing repressor-co-repressor complexes, which are recruited to promoters of target _	genes via interactions with sequence-specific transcription factors. The co-repressor complex contains a core of at least seven proteins. This family represents the conserved region found in Sds3, Dep1 and BRMS-1homologue p40 proteins.
gene_ID=unitig153_73	GT48	MFS_1	Major Facilitator Superfamily.
gene_ID=unitig153_77	GT2	Aminotran_3	Aminotransferase class-III.
gene_ID=unitig153_107	GT2	His_Phos_1	Histidine phosphatase superfamily (branch 1). The histidine phosphatase superfamily is so named because catalysis centres on a conserved His residue that is transiently phosphorylated during the catalytic cycle. Other conserved residues contribute to a 'phosphate pocket' and interact with the phospho group of substrate before, during and after its transfer to the His residue. Structure and sequen…
gene_ID=unitig153_111	GT22	DUF3445	Protein of unknown function (DUF3445). This family of proteins are functionally uncharacterized. This protein is found in bacteria and eukaryotes. Proteins in this family are typically between 264 to 418 amino acids in length. This protein has a conserved RLP sequence motif. This protein has two completely conserved R residues that may be functionally important.
gene_ID=unitig153_112	GT76	DUF3448/AMP-binding/DUF4009/Mannosyl_trans2	Domain of unknown function (DUF3448). This presumed domain is functionally uncharacterized. This domain is found in bacteria, archaea and eukaryotes. This domain is about 80 amino acids in length. This domain is found associated with pfam00501. This domain has a conserved DRH sequence motif. This domain has two completely conserved residues (N and A) that may be functionally important./AMP-bindin…
gene_ID=unitig153_113	CBM13	HSP70/MreB_Mbl	Hsp70 protein. Hsp70 chaperones help to fold many proteins. Hsp70 assisted folding involves repeated cycles of substrate binding and release. Hsp70 activity is ATP dependent. Hsp70 proteins are made up of two regions: the amino terminus is the ATPase domain and the carboxyl terminus is the substrate binding region./MreB/Mbl protein. This family consists of bacterial MreB and Mbl proteins as well …
gene_ID=unitig155_1_partial	GH13	dCMP_cyt_deam_1	Cytidine and deoxycytidylate deaminase zinc-binding region.
gene_ID=unitig155_2	GT4	Abhydrolase_6/Abhydrolase_1	Alpha/beta hydrolase family. This family contains alpha/beta hydrolase enzymes of diverse specificity./alpha/beta hydrolase fold. This catalytic domain is found in a very wide range of enzymes.
gene_ID=unitig155_5	GH55	LRR_8/SOG2/SOG2	Leucine rich repeat. /RAM signalling pathway protein. SOG2 proteins in Saccharomyces cerevisiae are involved in cell separation and cytokinesis./RAM signalling pathway protein. SOG2 proteins in Saccharomyces cerevisiae are involved in cell separation and cytokinesis.
gene_ID=unitig155_9	CBM13	PI-PLC-X/PI-PLC-Y/Bystin	Phosphatidylinositol-specific phospholipase C, X domain. This associates with pfam00387 to form a single structural unit./Phosphatidylinositol-specific phospholipase C, Y domain. This associates with pfam00388 to form a single structural unit./Bystin. Trophinin and tastin form a cell adhesion molecule complex that potentially mediates an initial attachment of the blastocyst to uterine epithelial …
gene_ID=unitig155_14	GH13	Alpha-amylase	Alpha amylase, catalytic domain. Alpha amylase is classified as family 13 of the glycosyl hydrolases. The structure is an 8 stranded alpha/beta barrel containing the active site, interrupted by a ~70 a.a. calcium-binding domain protruding between beta strand 3 and alpha helix 3, and a carboxyl-terminal Greek key beta-barrel domain.
gene_ID=unitig155_20	CE4	CPSase_sm_chain/GATase/CPSase_L_chain/CPSase_L_D2/CPSase_L_D3/CPSase_L_chain/ATP-grasp_4/Dala_Dala_lig_C/CPSase_L_D2/MGS/OTCace_N/OTCace	Carbamoyl-phosphate synthase small chain, CPSase domain. The carbamoyl-phosphate synthase domain is in the amino terminus of protein. Carbamoyl-phosphate synthase catalyzes the ATP-dependent synthesis of carbamyl-phosphate from glutamine or ammonia and bicarbonate. This important enzyme initiates both the urea cycle and the biosynthesis of arginine and/or pyrimidines. The carbamoyl-phosphate synt…
gene_ID=unitig158_10	CBM13	HSP70/MreB_Mbl	Hsp70 protein. Hsp70 chaperones help to fold many proteins. Hsp70 assisted folding involves repeated cycles of substrate binding and release. Hsp70 activity is ATP dependent. Hsp70 proteins are made up of two regions: the amino terminus is the ATPase domain and the carboxyl terminus is the substrate binding region./MreB/Mbl protein. This family consists of bacterial MreB and Mbl proteins as well …
gene_ID=unitig158_19	CE1	Prenyltrans_2	Prenyltransferase-like.
gene_ID=unitig158_26	GT22	DUF3445	Protein of unknown function (DUF3445). This family of proteins are functionally uncharacterized. This protein is found in bacteria and eukaryotes. Proteins in this family are typically between 264 to 418 amino acids in length. This protein has a conserved RLP sequence motif. This protein has two completely conserved R residues that may be functionally important.
gene_ID=unitig158_30	GT4	Methyltransf_25/Methyltransf_31/Methyltransf_11/Methyltransf_12	Methyltransferase domain. This family appears to be a methyltransferase domain./Methyltransferase domain. This family appears to be have methyltransferase activity./Methyltransferase domain. Members of this family are SAM dependent methyltransferases./Methyltransferase domain. Members of this family are SAM dependent methyltransferases.
gene_ID=unitig158_41	CBM51	LIP	Secretory lipase. These lipases are expressed and secreted during the infection cycle of these pathogens. In particular, C. albicans has a large number of different lipases, possibly reflecting broad lipolytic activity, which may contribute to the persistence and virulence of C. albicans in human tissue.
gene_ID=unitig159_4	GT48	MFS_1	Major Facilitator Superfamily.
gene_ID=unitig159_12	GH13	Pkinase/dCMP_cyt_deam_1	Protein kinase domain. /Cytidine and deoxycytidylate deaminase zinc-binding region.
gene_ID=unitig160_3	GH3	DHQ_synthase/EPSP_synthase/SKI/DHquinase_I/Shikimate_dh_N/Shikimate_DH	3-dehydroquinate synthase. The 3-dehydroquinate synthase EC:4.6.1.3 domain is present in isolation in various bacterial 3-dehydroquinate synthases and also present as a domain in the pentafunctional AROM polypeptide. 3-dehydroquinate (DHQ) synthase catalyzes the formation of dehydroquinate (DHQ) and orthophosphate from 3-deoxy-D-arabino heptulosonic 7 phosphate. This reaction is part of the shiki…
gene_ID=unitig160_5	GT1	PH/ArfGap	PH domain. PH stands for pleckstrin homology./Putative GTPase activating protein for Arf. Putative zinc fingers with GTPase activating proteins (GAPs) towards the small GTPase, Arf. The GAP of ARD1 stimulates GTPase hydrolysis for ARD1 but not ARFs.
gene_ID=unitig183_4	GT90	Thioredoxin	Thioredoxin. Thioredoxins are small enzymes that participate in redox reactions, via the reversible oxidation of an active centre disulfide bond. Some members with only the active site are not separated from the noise.
gene_ID=unitig183_6	GH1	PMI_typeI	Phosphomannose isomerase type I. This is a family of Phosphomannose isomerase type I enzymes (EC 5.3.1.8).
gene_ID=unitig183_29	CE11	S1/Helicase_C/HA2/OB_NTP_bind	S1 RNA binding domain. The S1 domain occurs in a wide range of RNA associated proteins. It is structurally similar to cold shock protein which binds nucleic acids. The S1 domain has an OB-fold structure./Helicase conserved C-terminal domain. The Prosite family is restricted to DEAD/H helicases, whereas this domain family is found in a wide variety of helicases and helicase related proteins. It ma…
gene_ID=unitig183_44	CBM48	DnaJ	DnaJ domain. DnaJ domains (J-domains) are associated with hsp70 heat-shock system and it is thought that this domain mediates the interaction. DnaJ-domain is therefore part of a chaperone (protein folding) system. The T-antigens, although not in Prosite are confirmed as DnaJ containing domains from literature.
gene_ID=unitig183_47	GT4	ABC_tran/ABC2_membrane/PDR_CDR/ABC2_membrane	ABC transporter. ABC transporters for a large family of proteins responsible for translocation of a variety of compounds across biological membranes. ABC transporters are the largest family of proteins in many completely sequenced bacteria. ABC transporters are composed of two copies of this domain and two copies of a transmembrane domain pfam00664. These four domains may belong to a single polyp…
gene_ID=unitig183_56	GH35	PRP1_N	PRP1 splicing factor, N-terminal. This domain is specific to the N-terminal part of the prp1 splicing factor, which is involved in mRNA splicing (and possibly also poly(A)+ RNA nuclear export and cell cycle progression). This domain is specific to the N terminus of the RNA splicing factor encoded by prp1. It is involved in mRNA splicing and possibly also poly(A)and RNA nuclear export and cell cyc…
gene_ID=unitig183_57	GH23	MAD	Mitotic checkpoint protein. This family consists of several eukaryotic mitotic checkpoint (Mitotic arrest deficient or MAD) proteins. The mitotic spindle checkpoint monitors proper attachment of the bipolar spindle to the kinetochores of aligned sister chromatids and causes a cell cycle arrest in prometaphase when failures occur. Multiple components of the mitotic spindle checkpoint have been ide…
gene_ID=unitig183_61	GH18	Na_Ca_ex	Sodium/calcium exchanger protein. This is a family of sodium/calcium exchanger integral membrane proteins. This family covers the integral membrane regions of the proteins. Sodium/calcium exchangers regulate intracellular Ca2+ concentrations in many cells; cardiac myocytes, epithelial cells, neurons retinal rod photoreceptors and smooth muscle cells. Ca2+ is moved into or out of the cytosol depen…
gene_ID=unitig183_62	CBM13	MreB_Mbl/HSP70	MreB/Mbl protein. This family consists of bacterial MreB and Mbl proteins as well as two related archaeal sequences. MreB is known to be a rod shape-determining protein in bacteria and goes to make up the bacterial cytoskeleton. Genes coding for MreB/Mbl are only found in elongated bacteria, not in coccoid forms. It has been speculated that constituents of the eukaryotic cytoskeleton (tubulin, ac…
gene_ID=unitig185_24	GH18	Glyco_hydro_18	Glycosyl hydrolases family 18.
gene_ID=unitig185_25	GH18	Glyco_hydro_18	Glycosyl hydrolases family 18.
gene_ID=unitig185_26	GH18	Glyco_hydro_18	Glycosyl hydrolases family 18.
gene_ID=unitig185_45	GT5	Tropomyosin_1	Tropomyosin like. This family is a set of eukaryotic tropomyosins. Within the yeast Tmp1 and Tmp2, biochemical and sequence analyses indicate that Tpm2p spans four actin monomers along a filament, whereas Tpmlp spans five. Despite its shorter length, Tpm2p can compete with Tpm1p for binding to F-actin. Over-expression of Tpm2p in vivo alters the axial budding of haploids to a bipolar pattern, and…	genesis. The family also contains higher eukaryote Tmp3 members.
gene_ID=unitig185_70	GT15	Glyco_transf_15	Glycolipid 2-alpha-mannosyltransferase. This is a family of alpha-1,2 mannosyl-transferases involved in N-linked and O-linked glycosylation of proteins. Some of the enzymes in this family have been shown to be involved in O- and N-linked glycan modifications in the Golgi.
gene_ID=unitig185_79	GT48	MFS_1	Major Facilitator Superfamily.
gene_ID=unitig185_80	GT48	AA_permease/AA_permease_2	Amino acid permease. /Amino acid permease.
gene_ID=unitig185_93	GT31	Adaptin_N	Adaptin N terminal region. This family consists of the N terminal region of various alpha, beta and gamma subunits of the AP-1, AP-2 and AP-3 adaptor protein complexes. The adaptor protein (AP) complexes are involved in the formation of clathrin-coated pits and vesicles. The N-terminal region of the various adaptor proteins (APs) is constant by comparison to the C-terminal which is variable withi…
gene_ID=unitig185_94	CBM50	CAP	Cysteine-rich secretory protein family. This is a large family of cysteine-rich secretory proteins, antigen 5, and patho_	genesis-related 1 proteins (CAP) that are found in a wide range of organisms, including prokaryotes and non-vertebrate eukaryotes, The nine subfamilies of the mammalian CAP 'super'family include: the human glioma patho_	genesis-related 1 (GLIPR1), Golgi associated patho_	genesis related-1 (GAPR1) proteins, peptidase inhibitor 15 (PI15), peptidase inhibitor 16 (PI16), cysteine-rich secretory proteins (CRISPs), CRISP LCCL domain containing 1 (CRISPLD1), CRISP LCCL domain containing 2 (CRISPLD2), mannose receptor like and the R3H domain containing like proteins. Members are most often secreted and have an extracellular endocrine or paracrine function and are involve…	genesis, potentially as either proteases or protease inhibitors; in ion channel regulation in fertility; as tumour suppressor or pro-oncogenic _	genes in tissues including the prostate; and in cell-cell adhesion during fertilisation. The overall protein structural conservation within the CAP 'super'family results in fundamentally similar functions for the CAP domain in all members, yet the diversity outside of this core region dramatically alters the target specificity and, thus, the biological consequences. The Ca++-chelating function wo…
gene_ID=unitig185_102	GH5/CE11	Pol_alpha_B_N/DNA_pol_E_B/ResIII/Helicase_C	DNA polymerase alpha subunit B N-terminal. This is the eukaryotic DNA polymerase alpha subunit B N-terminal domain which is involved in complex formation. Also see pfam04058./DNA polymerase alpha/epsilon subunit B. This family contains a number of DNA polymerase subunits. The B subunit of the DNA polymerase alpha plays an essential role at the initial stage of DNA replication in S. cerevisiae and…
gene_ID=unitig185_113	GH23	Uso1_p115_head/DUF3584/Myosin_tail_1	Uso1 / p115 like vesicle tethering protein, head region. Also known as General vesicular transport factor, Transcytosis associated protein (TAP) and Vesicle docking protein, this myosin-shaped molecule consists of an N-terminal globular head region, a coiled-coil tail which mediates dimerisation, and a short C-terminal acidic region. p115 tethers COP1 vesicles to the Golgi by binding the coiled c…
gene_ID=unitig185_117	CE11	Helicase_C	Helicase conserved C-terminal domain. The Prosite family is restricted to DEAD/H helicases, whereas this domain family is found in a wide variety of helicases and helicase related proteins. It may be that this is not an autonomously folding unit, but an integral part of the helicase.
gene_ID=unitig185_125	GT2	Myosin_head/Myosin_TH1	Myosin head (motor domain). /Myosin tail.
gene_ID=unitig185_128	GT2	Aminotran_3	Aminotransferase class-III.
gene_ID=unitig185_139	CE4	CPSase_L_chain/ATP-grasp_4/CPSase_L_D2/Biotin_carb_C/HMGL-like/PYC_OADA/Biotin_lipoyl	Carbamoyl-phosphate synthase L chain, N-terminal domain. Carbamoyl-phosphate synthase catalyzes the ATP-dependent synthesis of carbamyl-phosphate from glutamine or ammonia and bicarbonate. This important enzyme initiates both the urea cycle and the biosynthesis of arginine and/or pyrimidines. The carbamoyl-phosphate synthase (CPS) enzyme in prokaryotes is a heterodimer of a small and large chain.…
gene_ID=unitig185_153	CBM48	DnaJ	DnaJ domain. DnaJ domains (J-domains) are associated with hsp70 heat-shock system and it is thought that this domain mediates the interaction. DnaJ-domain is therefore part of a chaperone (protein folding) system. The T-antigens, although not in Prosite are confirmed as DnaJ containing domains from literature.
gene_ID=unitig185_158	GT48	AA_permease_2/AA_permease	Amino acid permease. /Amino acid permease.
gene_ID=unitig185_162	GT2	His_Phos_1	Histidine phosphatase superfamily (branch 1). The histidine phosphatase superfamily is so named because catalysis centres on a conserved His residue that is transiently phosphorylated during the catalytic cycle. Other conserved residues contribute to a 'phosphate pocket' and interact with the phospho group of substrate before, during and after its transfer to the His residue. Structure and sequen…
gene_ID=unitig185_166	CE10	FMO-like	Flavin-binding monooxygenase-like. This family includes FMO proteins, cyclohexanone mono-oxygenase and a number of different mono-oxygenases.
gene_ID=unitig185_167	CBM48	DnaJ/DnaJ-X/Complex1_LYR_1	DnaJ domain. DnaJ domains (J-domains) are associated with hsp70 heat-shock system and it is thought that this domain mediates the interaction. DnaJ-domain is therefore part of a chaperone (protein folding) system. The T-antigens, although not in Prosite are confirmed as DnaJ containing domains from literature./X-domain of DnaJ-containing. IN certain plant and yeast proteins, the DnaJ-1 proteins h…	genesis in mitochondria.
gene_ID=unitig185_168	GT48	MFS_1	Major Facilitator Superfamily.
gene_ID=unitig185_175	GT4	NTP_transferase	Nucleotidyl transferase. This family includes a wide range of enzymes which transfer nucleotides onto phosphosugars.
gene_ID=unitig185_176	GH78	Chalcone	Chalcone-flavanone isomerase. Chalcone-flavanone isomerase is a plant enzyme responsible for the isomerisation of chalcone to naringenin, a key step in the biosynthesis of flavonoids.
gene_ID=unitig185_178	GH32	Indigoidine_A/PfkB	Indigoidine synthase A like protein. Indigoidine is a blue pigment synthesised by Erwinia chrysanthemi implicated in pathogenicity and protection from oxidative stress. IdgA is involved in indigoidine biosynthesis, but its specific function is unknown. The recommended name for this protein is now pseudouridine-5'-phosphate glycosidase./pfkB family carbohydrate kinase. This family includes a varie…
gene_ID=unitig185_189	CBM21	SUR7	SUR7/PalI family. This family consists of several fungal-specific SUR7 proteins. Its activity regulates expression of RVS161, a homologue of human endophilin, suggesting a function for both in endocytosis. The protein carries four transmembrane domains and is thus likely to act as an anchoring protein for the eisosome to the plasma membrane. Eisosomes are the immobile protein complexes, that incl…
gene_ID=unitig185_190	CBM21	SUR7	SUR7/PalI family. This family consists of several fungal-specific SUR7 proteins. Its activity regulates expression of RVS161, a homologue of human endophilin, suggesting a function for both in endocytosis. The protein carries four transmembrane domains and is thus likely to act as an anchoring protein for the eisosome to the plasma membrane. Eisosomes are the immobile protein complexes, that incl…
gene_ID=unitig185_197	GT87	NUDIX	NUDIX domain.
gene_ID=unitig185_203	CE9	Glucosamine_iso	Glucosamine-6-phosphate isomerases/6-phosphogluconolactonase.
gene_ID=unitig185_218	CE11	DEAD/Helicase_C	DEAD/DEAH box helicase. Members of this family include the DEAD and DEAH box helicases. Helicases are involved in unwinding nucleic acids. The DEAD box helicases are involved in various aspects of RNA metabolism, including nuclear transcription, pre mRNA splicing, ribosome bio_	genesis, nucleocytoplasmic transport, translation, RNA decay and organellar _	gene expression./Helicase conserved C-terminal domain. The Prosite family is restricted to DEAD/H helicases, whereas this domain family is found in a wide variety of helicases and helicase related proteins. It may be that this is not an autonomously folding unit, but an integral part of the helicase.
gene_ID=unitig185_219	GH72	GTP1_OBG/MMR_HSR1	GTP1/OBG. The N-terminal domain of B. subtilis GTPase obgE has the OBG fold, which is formed by three glycine-rich regions inserted into a small 8-stranded beta-sandwich these regions form six left-handed collagen-like helices packed and H-bonded together./50S ribosome-binding GTPase. The full-length GTPase protein is required for the complete activity of the protein of interacting with the 50S r…
gene_ID=unitig185_228	CE10	DPPIV_N/Peptidase_S9	Dipeptidyl peptidase IV (DPP IV) N-terminal region. This family is an alignment of the region to the N-terminal side of the active site. The Prosite motif does not correspond to this Pfam entry./Prolyl oligopeptidase family.
gene_ID=unitig185_240	AA6	Flavodoxin_1/NIR_SIR_ferr/NIR_SIR	Flavodoxin. /Nitrite/Sulfite reductase ferredoxin-like half domain. Sulfite and Nitrite reductases are key to both biosynthetic assimilation of sulfur and nitrogen and dissimilation of oxidized anions for energy transduction. Two copies of this repeat are found in Nitrite and Sulfite reductases and form a single structural domain./Nitrite and sulphite reductase 4Fe-4S domain. Sulphite and nitrite…
gene_ID=unitig185_247	GT39	PMT/MIR	Dolichyl-phosphate-mannose-protein mannosyltransferase. This is a family of Dolichyl-phosphate-mannose-protein mannosyltransferase proteins EC:2.4.1.109. These proteins are responsible for O-linked glycosylation of proteins, they catalyze the reaction:- Dolichyl phosphate D-mannose + protein <=> dolichyl phosphate + O-D-mannosyl-protein. Also in this family is the Drosophila rotated abdomen prote…
gene_ID=unitig185_262	AA10	Rad60-SLD	Ubiquitin-2 like Rad60 SUMO-like. The small ubiquitin-related modifier SUMO-1 is a Ub/Ubl family member, and although SUMO-1 shares structural similarity to Ub, SUMO's cellular functions remain distinct insomuch as SUMO modification alters protein function through changes in activity, cellular localisation, or by protecting substrates from ubiquitination. Rad60 family members contain functionally…
gene_ID=unitig185_267	GT4	ABC2_membrane/PDR_CDR/ABC_tran/ABC2_membrane	ABC-2 type transporter. /CDR ABC transporter. Corresponds to a region of the PDR/CDR subgroup of ABC transporters comprising extracellular loop 3, transmembrane segment 6 and linker region./ABC transporter. ABC transporters for a large family of proteins responsible for translocation of a variety of compounds across biological membranes. ABC transporters are the largest family of proteins in many…
gene_ID=unitig185_270	GH76	Glyco_hydro_76/Glyco_hydro_76	Glycosyl hydrolase family 76. Family of alpha-1,6-mannanases./Glycosyl hydrolase family 76. Family of alpha-1,6-mannanases.
gene_ID=unitig185_275	GT48	MFS_1	Major Facilitator Superfamily.
gene_ID=unitig185_276	GT2	Glyco_tranf_2_3/Glycos_transf_2	Glycosyltransferase like family 2. Members of this family of prokaryotic proteins include putative glucosyltransferase, which are involved in bacterial capsule biosynthesis./Glycosyl transferase family 2. Diverse family, transferring sugar from UDP-glucose, UDP-N-acetyl- galactosamine, GDP-mannose or CDP-abequose, to a range of substrates including cellulose, dolichol phosphate and teichoic acids.
gene_ID=unitig185_292	GT22	DUF3445	Protein of unknown function (DUF3445). This family of proteins are functionally uncharacterized. This protein is found in bacteria and eukaryotes. Proteins in this family are typically between 264 to 418 amino acids in length. This protein has a conserved RLP sequence motif. This protein has two completely conserved R residues that may be functionally important.
gene_ID=unitig185_293	GT48	MFS_1	Major Facilitator Superfamily.
gene_ID=unitig185_301	AA3	GXGXG/Pyr_redox_2	GXGXG motif. This domain is found in glutamate synthase, tungsten formylmethanofuran dehydrogenase subunit c (FwdC) and molybdenum formylmethanofuran dehydrogenase subunit c (FmdC). A repeated G-XX-G-XXX-G motif is seen in the alignment./Pyridine nucleotide-disulphide oxidoreductase. This family includes both class I and class II oxidoreductases and also NADH oxidases and peroxidases. This domain…
gene_ID=unitig185_310	GH76	DASH_Spc19/ADH_N/ADH_zinc_N/ADH_zinc_N_2	Spc19. Spc19 is a component of the DASH complex. The DASH complex associates with the spindle pole body and is important for spindle and kinetochore integrity during cell division./Alcohol dehydrogenase GroES-like domain. This is the catalytic domain of alcohol dehydrogenases. Many of them contain an inserted zinc binding domain. This domain has a GroES-like structure./Zinc-binding dehydrogenase.…
gene_ID=unitig185_328	GT15	Glyco_transf_15	Glycolipid 2-alpha-mannosyltransferase. This is a family of alpha-1,2 mannosyl-transferases involved in N-linked and O-linked glycosylation of proteins. Some of the enzymes in this family have been shown to be involved in O- and N-linked glycan modifications in the Golgi.
gene_ID=unitig185_331	GH12	Peptidase_M16/Peptidase_M16_C	Insulinase (Peptidase family M16). /Peptidase M16 inactive domain. Peptidase M16 consists of two structurally related domains. One is the active peptidase, whereas the other is inactive. The two domains hold the substrate like a clamp.
gene_ID=unitig185_339	GH18	AhpC-TSA/Redoxin	AhpC/TSA family. This family contains proteins related to alkyl hydroperoxide reductase (AhpC) and thiol specific antioxidant (TSA)./Redoxin. This family of redoxins includes peroxiredoxin, thioredoxin and glutaredoxin proteins.
gene_ID=unitig185_342	GT66	Pro_isomerase	Cyclophilin type peptidyl-prolyl cis-trans isomerase/CLD. The peptidyl-prolyl cis-trans isomerases, also known as cyclophilins, share this domain of about 109 amino acids. Cyclophilins have been found in all organisms studied so far and catalyze peptidyl-prolyl isomerisation during which the peptide bond preceding proline (the peptidyl-prolyl bond) is stabilised in the cis conformation. Mammalian…
gene_ID=unitig185_349	GT4	ABC_tran/ABC2_membrane	ABC transporter. ABC transporters for a large family of proteins responsible for translocation of a variety of compounds across biological membranes. ABC transporters are the largest family of proteins in many completely sequenced bacteria. ABC transporters are composed of two copies of this domain and two copies of a transmembrane domain pfam00664. These four domains may belong to a single polyp…
gene_ID=unitig185_409	GT3	Glycogen_syn	Glycogen synthase. This family consists of the eukaryotic glycogen synthase proteins GYS1, GYS2 and GYS3. Glycogen synthase (GS) is the enzyme responsible for the synthesis of -1,4-linked glucose chains in glycogen. It is the rate limiting enzyme in the synthesis of the polysaccharide, and its activity is highly regulated through phosphorylation at multiple sites and also by allosteric effectors,…
gene_ID=unitig185_414	GT48	Glucan_synthase	1,3-beta-glucan synthase component. This family consists of various 1,3-beta-glucan synthase components including Gls1, Gls2 and Gls3 from yeast. 1,3-beta-glucan synthase EC:2.4.1.34 also known as callose synthase catalyzes the formation of a beta-1,3-glucan polymer that is a major component of the fungal cell wall. The reaction catalyzed is:- UDP-glucose + {(1,3)-beta-D-glucosyl}(N) <=> UDP + {(…
gene_ID=unitig185_415	GT48	Peptidase_S8/Glucan_synthase	Subtilase family. Subtilases are a family of serine proteases. They appear to have independently and convergently evolved an Asp/Ser/His catalytic triad, like that found in the trypsin serine proteases (see pfam00089). Structure is an alpha/beta fold containing a 7-stranded parallel beta sheet, order 2314567./1,3-beta-glucan synthase component. This family consists of various 1,3-beta-glucan synt…
gene_ID=unitig185_416	CE4	CPSase_L_chain/CPSase_L_D2/ATP-grasp_4/Biotin_carb_C/Biotin_lipoyl/ACC_central/Carboxyl_trans	Carbamoyl-phosphate synthase L chain, N-terminal domain. Carbamoyl-phosphate synthase catalyzes the ATP-dependent synthesis of carbamyl-phosphate from glutamine or ammonia and bicarbonate. This important enzyme initiates both the urea cycle and the biosynthesis of arginine and/or pyrimidines. The carbamoyl-phosphate synthase (CPS) enzyme in prokaryotes is a heterodimer of a small and large chain.…
gene_ID=unitig185_417	GT48	Sugar_tr	Sugar (and other) transporter.
gene_ID=unitig185_433	GT48	RVT_1	Reverse transcriptase (RNA-dependent DNA polymerase). A reverse transcriptase _	gene is usually indicative of a mobile element such as a retrotransposon or retrovirus. Reverse transcriptases occur in a variety of mobile elements, including retrotransposons, retroviruses, group II introns, bacterial msDNAs, hepadnaviruses, and caulimoviruses.
gene_ID=unitig185_436	AA4/AA7	FAD_binding_4/FAD-oxidase_C	FAD binding domain. This family consists of various enzymes that use FAD as a co-factor, most of the enzymes are similar to oxygen oxidoreductase. One of the enzymes Vanillyl-alcohol oxidase (VAO) has a solved structure, the alignment includes the FAD binding site, called the PP-loop, between residues 99-110. The FAD molecule is covalently bound in the known structure, however the residue that li…
gene_ID=unitig186_2	AA4/AA7	FAD_binding_4/FAD-oxidase_C	FAD binding domain. This family consists of various enzymes that use FAD as a co-factor, most of the enzymes are similar to oxygen oxidoreductase. One of the enzymes Vanillyl-alcohol oxidase (VAO) has a solved structure, the alignment includes the FAD binding site, called the PP-loop, between residues 99-110. The FAD molecule is covalently bound in the known structure, however the residue that li…
gene_ID=unitig186_11	GT2	His_Phos_1	Histidine phosphatase superfamily (branch 1). The histidine phosphatase superfamily is so named because catalysis centres on a conserved His residue that is transiently phosphorylated during the catalytic cycle. Other conserved residues contribute to a 'phosphate pocket' and interact with the phospho group of substrate before, during and after its transfer to the His residue. Structure and sequen…
gene_ID=unitig186_14	GT20	Glyco_transf_20	Glycosyltransferase family 20. Members of this family belong to glycosyl transferase family 20. OtsA (Trehalose-6-phosphate synthase) is homologous to regions in the subunits of yeast trehalose-6-phosphate synthase/phosphate complex.
gene_ID=unitig186_15	GT20	Glyco_transf_20/Trehalose_PPase	Glycosyltransferase family 20. Members of this family belong to glycosyl transferase family 20. OtsA (Trehalose-6-phosphate synthase) is homologous to regions in the subunits of yeast trehalose-6-phosphate synthase/phosphate complex./Trehalose-phosphatase. This family consist of trehalose-phosphatases EC:3.1.3.12 these enzyme catalyze the de-phosphorylation of trehalose-6-phosphate to trehalose a…	genes in the E. coli otsBA operon otsA the trehalose-6-phosphate synthase and otsB trehalose-phosphatase (this family) have undergone _	gene fusion in most eukaryotes. Trehalose is a common disaccharide of bacteria, fungi and invertebrates that appears to play a major role in desiccation tolerance.
gene_ID=unitig186_21	GT4	ABC_tran/ABC2_membrane	ABC transporter. ABC transporters for a large family of proteins responsible for translocation of a variety of compounds across biological membranes. ABC transporters are the largest family of proteins in many completely sequenced bacteria. ABC transporters are composed of two copies of this domain and two copies of a transmembrane domain pfam00664. These four domains may belong to a single polyp…
gene_ID=unitig186_22	GT4	ABC2_membrane	ABC-2 type transporter.
gene_ID=unitig186_34	GT20	Ctr	Ctr copper transporter family. The redox active metal copper is an essential cofactor in critical biological processes such as respiration, iron transport, oxidative stress protection, hormone production, and pigmentation. A widely conserved family of high-affinity copper transport proteins (Ctr proteins) mediates copper uptake at the plasma membrane. A series of clustered methionine residues in …
gene_ID=unitig186_61	GH32	PfkB	pfkB family carbohydrate kinase. This family includes a variety of carbohydrate and pyrimidine kinases.
gene_ID=unitig186_67	CBM48	AMPKBI	5'-AMP-activated protein kinase beta subunit, interation domain. This region is found in the beta subunit of the 5'-AMP-activated protein kinase complex, and its yeast homologues Sip1, Sip2 and Gal83, which are found in the SNF1 kinase complex. This region is sufficient for interaction of this subunit with the kinase complex, but is not solely responsible for the interaction, and the interaction …
gene_ID=unitig186_80	GT4	Acyltransferase	Acyltransferase. This family contains acyltransferases involved in phospholipid biosynthesis and other proteins of unknown function. This family also includes tafazzin, the Barth syndrome _	gene.
gene_ID=unitig186_91	GT62	Anp1	Anp1. The members of this family (Anp1, Van1 and Mnn9) are membrane proteins required for proper Golgi function. These proteins co-localise within the cis Golgi, and that they are physically associated in two distinct complexes.
gene_ID=unitig186_93	GH28	Zn_clus	Fungal Zn(2)-Cys(6) binuclear cluster domain.
gene_ID=unitig186_102	GT57	Alg6_Alg8	ALG6, ALG8 glycosyltransferase family. N-linked (asparagine-linked) glycosylation of proteins is mediated by a highly conserved pathway in eukaryotes, in which a lipid (dolichol phosphate)-linked oligosaccharide is assembled at the endoplasmic reticulum membrane prior to the transfer of the oligosaccharide moiety to the target asparagine residues. This oligosaccharide is composed of Glc(3)Man(9)G…	gene, a C->T transition, which causes Ala333 to be replaced with Val, has been identified as the cause of a congenital disorder of glycosylation, designated as type Ic OMIM:603147.
gene_ID=unitig186_105	CE11	Helicase_C/HA2/OB_NTP_bind	Helicase conserved C-terminal domain. The Prosite family is restricted to DEAD/H helicases, whereas this domain family is found in a wide variety of helicases and helicase related proteins. It may be that this is not an autonomously folding unit, but an integral part of the helicase./Helicase associated domain (HA2). This presumed domain is about 90 amino acid residues in length. It is found is a…
gene_ID=unitig186_109	CBM21	SUR7	SUR7/PalI family. This family consists of several fungal-specific SUR7 proteins. Its activity regulates expression of RVS161, a homologue of human endophilin, suggesting a function for both in endocytosis. The protein carries four transmembrane domains and is thus likely to act as an anchoring protein for the eisosome to the plasma membrane. Eisosomes are the immobile protein complexes, that incl…
gene_ID=unitig186_142	CE11	SNF2_N/Helicase_C	SNF2 family N-terminal domain. This domain is found in proteins involved in a variety of processes including transcription regulation (e.g., SNF2, STH1, brahma, MOT1), DNA repair (e.g. ERCC6, RAD16, RAD5), DNA recombination (e.g. RAD54), and chromatin unwinding (e.g. ISWI) as well as a variety of other proteins with little functional information (e.g. lodestar, ETL1)./Helicase conserved C-termina…
gene_ID=unitig186_149	GT48	MFS_1	Major Facilitator Superfamily.
gene_ID=unitig186_150	CE11	SNF2_N/Helicase_C	SNF2 family N-terminal domain. This domain is found in proteins involved in a variety of processes including transcription regulation (e.g., SNF2, STH1, brahma, MOT1), DNA repair (e.g. ERCC6, RAD16, RAD5), DNA recombination (e.g. RAD54), and chromatin unwinding (e.g. ISWI) as well as a variety of other proteins with little functional information (e.g. lodestar, ETL1)./Helicase conserved C-termina…
gene_ID=unitig186_156	GT1	Alg14	Oligosaccharide biosynthesis protein Alg14 like. Alg14 is involved dolichol-linked oligosaccharide biosynthesis and anchors the catalytic subunit Alg13 to the ER membrane.
gene_ID=unitig186_169_partial	CE11	S1/Helicase_C/HA2/OB_NTP_bind	S1 RNA binding domain. The S1 domain occurs in a wide range of RNA associated proteins. It is structurally similar to cold shock protein which binds nucleic acids. The S1 domain has an OB-fold structure./Helicase conserved C-terminal domain. The Prosite family is restricted to DEAD/H helicases, whereas this domain family is found in a wide variety of helicases and helicase related proteins. It ma…
gene_ID=unitig187_5	GH2	Trp_syntA/PALP	Tryptophan synthase alpha chain. /Pyridoxal-phosphate dependent enzyme. Members of this family are all pyridoxal-phosphate dependent enzymes. This family includes: serine dehydratase EC:4.2.1.13 P20132, threonine dehydratase EC:4.2.1.16, tryptophan synthase beta chain EC:4.2.1.20, threonine synthase EC:4.2.99.2, cysteine synthase EC:4.2.99.8 P11096, cystathionine beta-synthase EC:4.2.1.22, -1amin…
gene_ID=unitig187_7	GT39	PMT/MIR	Dolichyl-phosphate-mannose-protein mannosyltransferase. This is a family of Dolichyl-phosphate-mannose-protein mannosyltransferase proteins EC:2.4.1.109. These proteins are responsible for O-linked glycosylation of proteins, they catalyze the reaction:- Dolichyl phosphate D-mannose + protein <=> dolichyl phosphate + O-D-mannosyl-protein. Also in this family is the Drosophila rotated abdomen prote…
gene_ID=unitig187_10	GT28	Glyco_tran_28_C	Glycosyltransferase family 28 C-terminal domain. The glycosyltransferase family 28 includes monogalactosyldiacylglycerol synthase (EC 2.4.1.46) and UDP-N-acetylglucosamine transferase (EC 2.4.1.-). Structural analysis suggests the C-terminal domain contains the UDP-GlcNAc binding site.
gene_ID=unitig187_13	CE1	Abhydrolase_2	Phospholipase/Carboxylesterase. This family consists of both phospholipases and carboxylesterases with broad substrate specificity, and is structurally related to alpha/beta hydrolases pfam00561.
gene_ID=unitig187_20	GT4	Abhydrolase_5/Abhydrolase_6/Abhydrolase_1	Alpha/beta hydrolase family. This family contains a diverse range of alpha/beta hydrolase enzymes./Alpha/beta hydrolase family. This family contains alpha/beta hydrolase enzymes of diverse specificity./alpha/beta hydrolase fold. This catalytic domain is found in a very wide range of enzymes.
gene_ID=unitig187_23	GT71	Mannosyl_trans3	Mannosyltransferase putative. This family is conserved in fungi. Several members are annotated as being alpha-1,3-mannosyltransferase but this could not be confirmed.
gene_ID=unitig187_30	GH84	Peptidase_M24	Metallopeptidase family M24. This family contains metallopeptidases. It also contains non-peptidase homologues such as the N terminal domain of Spt16 which is a histone H3-H4 binding module.
gene_ID=unitig187_40	GT62	Anp1	Anp1. The members of this family (Anp1, Van1 and Mnn9) are membrane proteins required for proper Golgi function. These proteins co-localise within the cis Golgi, and that they are physically associated in two distinct complexes.
gene_ID=unitig187_41	GH72	MMR_HSR1/NOG1/NOGCT	50S ribosome-binding GTPase. The full-length GTPase protein is required for the complete activity of the protein of interacting with the 50S ribosome and binding of both adenine and guanine nucleotides, with a preference for guanine nucleotide./Nucleolar GTP-binding protein 1 (NOG1). This family represents a conserved region of approximately 60 residues in length within nucleolar GTP-binding prot…	gene has been shown to be essential for cell viability, suggesting that NOG1 may play an important role in nucleolar functions. Family members include eukaryotic, bacterial and archaeal proteins./NOGCT (NUC087) domain. This C terminal domain is found in the NOG subfamily of nucleolar GTP-binding proteins.
gene_ID=unitig187_48	GT24	UDP-g_GGTase	UDP-glucose:Glycoprotein Glucosyltransferase. The N-terminal region of this group of proteins is required for correct folding of the ER UDP-Glc: glucosyltransferase.
gene_ID=unitig187_56	GH13	PseudoU_synth_2/dCMP_cyt_deam_1	RNA pseudouridylate synthase. Members of this family are involved in modifying bases in RNA molecules. They carry out the conversion of uracil bases to pseudouridine. This family includes RluD, a pseudouridylate synthase that converts specific uracils to pseudouridine in 23S rRNA. RluA from E. coli converts bases in both rRNA and tRNA./Cytidine and deoxycytidylate deaminase zinc-binding region.
gene_ID=unitig187_65	GT41	TPR_11/TPR_11	TPR repeat. /TPR repeat.
gene_ID=unitig187_74	GH55	Cupin_8	Cupin-like domain. This cupin like domain shares similarity to the JmjC domain.
gene_ID=unitig187_77	AA6	Flavodoxin_1/FMN_red	Flavodoxin. /NADPH-dependent FMN reductase.
gene_ID=unitig187_78	AA6	FMN_red	NADPH-dependent FMN reductase.
gene_ID=unitig187_79	CE4	Polysacc_deac_1	Polysaccharide deacetylase. This domain is found in polysaccharide deacetylase. This family of polysaccharide deacetylases includes NodB (nodulation protein B from Rhizobium) which is a chitooligosaccharide deacetylase. It also includes chitin deacetylase from yeast, and endoxylanases which hydrolyses glucosidic bonds in xylan.
gene_ID=unitig187_81	GH32	Ferric_reduct/FAD_binding_8/NAD_binding_6/Ferric_reduct/FAD_binding_8/NAD_binding_6	Ferric reductase like transmembrane component. This family includes a common region in the transmembrane proteins mammalian cytochrome B-245 heavy chain (gp9-1phox), ferric reductase transmembrane component in yeast and respiratory burst oxidase from mouse-ear cress. This may be a family of flavocytochromes capable of moving electrons across the plasma membrane. The Frp1 protein from S. pombe is …	gene codes for the beta chain of cytochrome B-245 and cytochrome B-245 is missing from patients with the disease./FAD-binding domain. /Ferric reductase NAD binding domain. /Ferric reductase like transmembrane component. This family includes a common region in the transmembrane proteins mammalian cytochrome B-245 heavy chain (gp9-1phox), ferric reductase transmembrane component in yeast and respir…	gene codes for the beta chain of cytochrome B-245 and cytochrome B-245 is missing from patients with the disease./FAD-binding domain. /Ferric reductase NAD binding domain.
gene_ID=unitig187_92	GH84	Peptidase_M24	Metallopeptidase family M24. This family contains metallopeptidases. It also contains non-peptidase homologues such as the N terminal domain of Spt16 which is a histone H3-H4 binding module.
gene_ID=unitig187_95	GH65	HAD_2	Haloacid dehalogenase-like hydrolase.
gene_ID=unitig187_117	GT48	MFS_1	Major Facilitator Superfamily.
gene_ID=unitig187_119	GT48	MFS_1	Major Facilitator Superfamily.
gene_ID=unitig187_120	GT48	MFS_1	Major Facilitator Superfamily.
gene_ID=unitig189_17	GT4	ABC_tran/ABC2_membrane/PDR_CDR	ABC transporter. ABC transporters for a large family of proteins responsible for translocation of a variety of compounds across biological membranes. ABC transporters are the largest family of proteins in many completely sequenced bacteria. ABC transporters are composed of two copies of this domain and two copies of a transmembrane domain pfam00664. These four domains may belong to a single polyp…
gene_ID=unitig189_18	GT4	ABC_tran/ABC2_membrane	ABC transporter. ABC transporters for a large family of proteins responsible for translocation of a variety of compounds across biological membranes. ABC transporters are the largest family of proteins in many completely sequenced bacteria. ABC transporters are composed of two copies of this domain and two copies of a transmembrane domain pfam00664. These four domains may belong to a single polyp…
gene_ID=unitig189_25	GH92	adh_short/adh_short_C2	short chain dehydrogenase. This family contains a wide variety of dehydrogenases./Enoyl-(Acyl carrier protein) reductase.
gene_ID=unitig189_43	GH3	Glyco_hydro_3	Glycosyl hydrolase family 3 N terminal domain.
gene_ID=unitig189_45	GT34	p450	Cytochrome P450. Cytochrome P450s are haem-thiolate proteins involved in the oxidative degradation of various compounds. They are particularly well known for their role in the degradation of environmental toxins and mutagens. They can be divided into 4 classes, according to the method by which electrons from NAD(P)H are delivered to the catalytic site. Sequence conservation is relatively low with…	general topography and structural fold are highly conserved. The conserved core is composed of a coil termed the 'meander', a four-helix bundle, helices J and K, and two sets of beta-sheets. These constitute the haem-binding loop (with an absolutely conserved cysteine that serves as the 5th ligand for the haem iron), the proton-transfer groove and the absolutely conserved EXXR motif in helix K. W…	general enzymatic function is to catalyze regiospecific and stereospecific oxidation of non-activated hydrocarbons at physiological temperatures.
gene_ID=unitig189_48	GT48	AA_permease/AA_permease_2	Amino acid permease. /Amino acid permease.
gene_ID=unitig189_53	GH76	ADH_N/ADH_zinc_N	Alcohol dehydrogenase GroES-like domain. This is the catalytic domain of alcohol dehydrogenases. Many of them contain an inserted zinc binding domain. This domain has a GroES-like structure./Zinc-binding dehydrogenase.
gene_ID=unitig189_57	GH18	tRNA-synt_1/tRNA-synt_1g/Anticodon_1	tRNA synthetases class I (I, L, M and V). Other tRNA synthetase sub-families are too dissimilar to be included./tRNA synthetases class I (M). This family includes methionyl tRNA synthetases./Anticodon-binding domain of tRNA. This domain is found mainly hydrophobic tRNA synthetases. The domain binds to the anticodon of the tRNA.
gene_ID=unitig189_63	GT48	MFS_1/Sugar_tr	Major Facilitator Superfamily. /Sugar (and other) transporter.
gene_ID=unitig189_73	GT41	TPR_11	TPR repeat.
gene_ID=unitig189_83	GH132	SUN	Beta-glucosidase (SUN family). Members of this family include Nca3, Sun4 and Sim1. This is a family of yeast proteins, involved in a diverse set of functions (DNA replication, aging, mitochondrial bio_	genesis and cell septation). BGLA from Candida wickerhamii has been characterized as a Beta-glucosidase EC:3.2.1.21.
gene_ID=unitig189_93	CBM48	DnaJ/DnaJ_CXXCXGXG/DnaJ_C	DnaJ domain. DnaJ domains (J-domains) are associated with hsp70 heat-shock system and it is thought that this domain mediates the interaction. DnaJ-domain is therefore part of a chaperone (protein folding) system. The T-antigens, although not in Prosite are confirmed as DnaJ containing domains from literature./DnaJ central domain. The central cysteine-rich (CR) domain of DnaJ proteins contains fo…
gene_ID=unitig189_97	GT48	MFS_1	Major Facilitator Superfamily.
gene_ID=unitig189_98	CE11	DEAD	DEAD/DEAH box helicase. Members of this family include the DEAD and DEAH box helicases. Helicases are involved in unwinding nucleic acids. The DEAD box helicases are involved in various aspects of RNA metabolism, including nuclear transcription, pre mRNA splicing, ribosome bio_	genesis, nucleocytoplasmic transport, translation, RNA decay and organellar _	gene expression.
gene_ID=unitig189_105	CBM21	SUR7	SUR7/PalI family. This family consists of several fungal-specific SUR7 proteins. Its activity regulates expression of RVS161, a homologue of human endophilin, suggesting a function for both in endocytosis. The protein carries four transmembrane domains and is thus likely to act as an anchoring protein for the eisosome to the plasma membrane. Eisosomes are the immobile protein complexes, that incl…
gene_ID=unitig189_116	GT2	Pkinase/HisKA/HATPase_c	Protein kinase domain. /His Kinase A (phospho-acceptor) domain. Dimerisation and phospho-acceptor domain of histidine kinases./Histidine kinase-, DNA gyrase B-, and HSP90-like ATPase. This family represents the structurally related ATPase domains of histidine kinase, DNA gyrase B and HSP90.
gene_ID=unitig189_123	GT4	Methyltransf_23/Methyltransf_18/Methyltransf_31/Methyltransf_25/Methyltransf_11/Methyltransf_12	Methyltransferase domain. This family appears to be a methyltransferase domain./Methyltransferase domain. Protein in this family function as methyltransferases./Methyltransferase domain. This family appears to be have methyltransferase activity./Methyltransferase domain. This family appears to be a methyltransferase domain./Methyltransferase domain. Members of this family are SAM dependent methyl…
gene_ID=unitig189_125	GT34	Pex2_Pex12/Glyco_transf_34	Pex2 / Pex12 amino terminal region. This region is found at the N terminal of a number of known and predicted peroxins including Pex2, Pex10 and Pex12. This conserved region is usually associated with a C terminal ring finger (pfam00097) domain./galactosyl transferase GMA12/MNN10 family. This family contains a number of glycosyltransferase enzymes that contain a DXD motif. This family includes a …
gene_ID=unitig189_128	GT41	TPR_11/PRA-CH/PRA-PH/Histidinol_dh	TPR repeat. /Phosphoribosyl-AMP cyclohydrolase. This enzyme catalyzes the third step in the histidine biosynthetic pathway. It requires Zn ions for activity./Phosphoribosyl-ATP pyrophosphohydrolase. This enzyme catalyzes the second step in the histidine biosynthetic pathway./Histidinol dehydrogenase.
gene_ID=unitig189_152	GH76	ADH_N/ADH_zinc_N	Alcohol dehydrogenase GroES-like domain. This is the catalytic domain of alcohol dehydrogenases. Many of them contain an inserted zinc binding domain. This domain has a GroES-like structure./Zinc-binding dehydrogenase.
gene_ID=unitig189_155	CE11	SNF2_N/Helicase_C	SNF2 family N-terminal domain. This domain is found in proteins involved in a variety of processes including transcription regulation (e.g., SNF2, STH1, brahma, MOT1), DNA repair (e.g. ERCC6, RAD16, RAD5), DNA recombination (e.g. RAD54), and chromatin unwinding (e.g. ISWI) as well as a variety of other proteins with little functional information (e.g. lodestar, ETL1)./Helicase conserved C-termina…
gene_ID=unitig189_160	GH38	rve	Integrase core domain. Integrase mediates integration of a DNA copy of the viral genome into the host chromosome. Integrase is composed of three domains. The amino-terminal domain is a zinc binding domain pfam02022. This domain is the central catalytic domain. The carboxyl terminal domain that is a non-specific DNA binding domain pfam00552. The catalytic domain acts as an endonuclease when two nu…
gene_ID=unitig189_163	AA6	Flavodoxin_1/Wyosine_form	Flavodoxin. /Wyosine base formation. Some proteins in this family appear to be important in wyosine base formation in a subset of phenylalanine specific tRNAs. It has been proposed that they participates in converting tRNA(Phe)-m(1)G(37) to tRNA(Phe)-yW.
gene_ID=unitig189_182	GT48	AA_permease_2/AA_permease	Amino acid permease. /Amino acid permease.
gene_ID=unitig189_183	CE11	DEAD	DEAD/DEAH box helicase. Members of this family include the DEAD and DEAH box helicases. Helicases are involved in unwinding nucleic acids. The DEAD box helicases are involved in various aspects of RNA metabolism, including nuclear transcription, pre mRNA splicing, ribosome bio_	genesis, nucleocytoplasmic transport, translation, RNA decay and organellar _	gene expression.
gene_ID=unitig189_184	CE11	Helicase_C	Helicase conserved C-terminal domain. The Prosite family is restricted to DEAD/H helicases, whereas this domain family is found in a wide variety of helicases and helicase related proteins. It may be that this is not an autonomously folding unit, but an integral part of the helicase.
gene_ID=unitig189_187	GH28	Zn_clus	Fungal Zn(2)-Cys(6) binuclear cluster domain.
gene_ID=unitig189_192	GT2	6PF2K/His_Phos_1	6-phosphofructo-2-kinase. This enzyme occurs as a bifunctional enzyme with fructose-2,6-bisphosphatase. The bifunctional enzyme catalyzes both the synthesis and degradation of fructose-2,6-bisphosphate, a potent regulator of glycolysis. This enzyme contains a P-loop motif./Histidine phosphatase superfamily (branch 1). The histidine phosphatase superfamily is so named because catalysis centres on …
gene_ID=unitig189_201	AA3	Pyr_redox_2/Pyr_redox	Pyridine nucleotide-disulphide oxidoreductase. This family includes both class I and class II oxidoreductases and also NADH oxidases and peroxidases. This domain is actually a small NADH binding domain within a larger FAD binding domain./Pyridine nucleotide-disulphide oxidoreductase. This family includes both class I and class II oxidoreductases and also NADH oxidases and peroxidases. This domain…
gene_ID=unitig189_204	GT15	Hira	TUP-1like enhancer of split. The Hira proteins are found in a range of eukaryotes and are implicated in the assembly of repressive chromatin. These proteins also contain pfam00400.
gene_ID=unitig189_220	GH18	AhpC-TSA/-1cysPrx_C	AhpC/TSA family. This family contains proteins related to alkyl hydroperoxide reductase (AhpC) and thiol specific antioxidant (TSA)./C-terminal domain of -1Cys peroxiredoxin. This is the C-terminal domain of -1Cys peroxiredoxin (-1cysPrx), a member of the peroxiredoxin superfamily which protect cells against membrane oxidation through glutathione (GSH)-dependent reduction of phospholipid hydroper…
gene_ID=unitig189_228	AA3	DAO	FAD dependent oxidoreductase. This family includes various FAD dependent oxidoreductases: Glycerol-3-phosphate dehydrogenase EC:1.1.99.5, Sarcosine oxidase beta subunit EC:1.5.3.1, D-alanine oxidase EC:1.4.99.1, D-aspartate oxidase EC:1.4.3.1.
gene_ID=unitig189_240	GH92	adh_short/adh_short_C2	short chain dehydrogenase. This family contains a wide variety of dehydrogenases./Enoyl-(Acyl carrier protein) reductase.
gene_ID=unitig189_248	CE11	Helicase_C/HAND/SLIDE	Helicase conserved C-terminal domain. The Prosite family is restricted to DEAD/H helicases, whereas this domain family is found in a wide variety of helicases and helicase related proteins. It may be that this is not an autonomously folding unit, but an integral part of the helicase./HAND. The HAND domain adopts a secondary structure consisting of four alpha helices, three of which (H2, H3, H4) f…
gene_ID=unitig189_250	GH132	Chs3p/FCH/RhoGAP	Chitin synthase III catalytic subunit. This family of proteins is found in eukaryotes. Proteins in this family are typically between 288 and 332 amino acids in length. This family is the catalytic domain of chitin synthase III. Chitin is a major component of fungal cell walls and this enzyme is responsible for its formation./Fes/CIP4, and EFC/F-BAR homology domain. Alignment extended from. Highly…
gene_ID=unitig189_253	GT59	QCR10	Ubiquinol-cytochrome-c reductase complex subunit (QCR10). The QCR10 family of proteins are a component of the ubiquinol-cytochrome c reductase complex (also known as complex III or cytochrome b-c1 complex). This complex is located on the inner mitochondrial membrane and it couples electron transfer from ubiquinol to cytochrome. This subunit (QCR10) is required for stable association of the iron-s…
gene_ID=unitig189_260	GH32	Phos_pyr_kin/PfkB	Phosphomethylpyrimidine kinase. This enzyme EC:2.7.4.7 is part of the Thiamine pyrophosphate (TPP) synthesis pathway, TPP is an essential cofactor for many enzymes./pfkB family carbohydrate kinase. This family includes a variety of carbohydrate and pyrimidine kinases.
gene_ID=unitig189_266	GT48	MFS_1	Major Facilitator Superfamily.
gene_ID=unitig189_278	GT4	Glyco_transf_4/Glyco_trans_4_4/PIGA/Glycos_transf_1	Glycosyltransferase Family 4. /Glycosyl transferase 4-like domain. /PIGA (GPI anchor biosynthesis). This domain is found on phosphatidylinositol n-acetylglucosaminyltransferase proteins. These proteins are involved in GPI anchor biosynthesis and are associated with disease the paroxysmal nocturnal haemoglobinuria./Glycosyl transferases group 1. Mutations in this domain of human PIGA lead to disea…
gene_ID=unitig189_280	GT41	Acetyltransf_1	Acetyltransferase (GNAT) family. This family contains proteins with N-acetyltransferase functions such as Elp3-related proteins.
gene_ID=unitig189_281	CBM48	DnaJ	DnaJ domain. DnaJ domains (J-domains) are associated with hsp70 heat-shock system and it is thought that this domain mediates the interaction. DnaJ-domain is therefore part of a chaperone (protein folding) system. The T-antigens, although not in Prosite are confirmed as DnaJ containing domains from literature.
gene_ID=unitig189_291	GH92	adh_short/adh_short_C2	short chain dehydrogenase. This family contains a wide variety of dehydrogenases./Enoyl-(Acyl carrier protein) reductase.
gene_ID=unitig189_294	GT59	DIE2_ALG10	DIE2/ALG10 family. The ALG10 protein from Saccharomyces cerevisiae encodes the alpha-1,2 glucosyltransferase of the endoplasmic reticulum. This protein has been characterized in rat as potassium channel regulator 1.
gene_ID=unitig189_306	GH72/CBM43	Glyco_hydro_72/X8	Glucanosyltransferase. This is a family of glycosylphosphatidylinositol-anchored beta(-13)glucanosyltransferases. The active site residues in the Aspergillus fumigatus example are the two glutamate residues at 160 and 261./X8 domain. The X8 domain domain contains at least 6 conserved cysteine residues that presumably form three disulphide bridges. The domain is found in an Olive pollen allergen a…
gene_ID=unitig189_318	CE11	DEAD/Helicase_C	DEAD/DEAH box helicase. Members of this family include the DEAD and DEAH box helicases. Helicases are involved in unwinding nucleic acids. The DEAD box helicases are involved in various aspects of RNA metabolism, including nuclear transcription, pre mRNA splicing, ribosome bio_	genesis, nucleocytoplasmic transport, translation, RNA decay and organellar _	gene expression./Helicase conserved C-terminal domain. The Prosite family is restricted to DEAD/H helicases, whereas this domain family is found in a wide variety of helicases and helicase related proteins. It may be that this is not an autonomously folding unit, but an integral part of the helicase.
gene_ID=unitig189_321	GT48	Sugar_tr/MFS_1	Sugar (and other) transporter. /Major Facilitator Superfamily.
gene_ID=unitig189_332	CE4	CPSase_L_chain/CPSase_L_D2/CPSase_L_D3/CPSase_L_chain/CPSase_L_D2/ATP-grasp_4/ATP-grasp	Carbamoyl-phosphate synthase L chain, N-terminal domain. Carbamoyl-phosphate synthase catalyzes the ATP-dependent synthesis of carbamyl-phosphate from glutamine or ammonia and bicarbonate. This important enzyme initiates both the urea cycle and the biosynthesis of arginine and/or pyrimidines. The carbamoyl-phosphate synthase (CPS) enzyme in prokaryotes is a heterodimer of a small and large chain.…
gene_ID=unitig189_343	GT48	RVT_1	Reverse transcriptase (RNA-dependent DNA polymerase). A reverse transcriptase _	gene is usually indicative of a mobile element such as a retrotransposon or retrovirus. Reverse transcriptases occur in a variety of mobile elements, including retrotransposons, retroviruses, group II introns, bacterial msDNAs, hepadnaviruses, and caulimoviruses.
gene_ID=unitig189_354	GH47	Glyco_hydro_47	Glycosyl hydrolase family 47. Members of this family are alpha-mannosidases that catalyze the hydrolysis of the terminal 1,2-linked alpha-D-mannose residues in the oligo-mannose oligosaccharide Man(9)(GlcNAc)(2).
gene_ID=unitig189_358	GT48	MFS_1	Major Facilitator Superfamily.
gene_ID=unitig189_366	GT22	Utp12/Glyco_transf_22	Dip2/Utp12 Family. This domain is found at the C-terminus of proteins containing WD40 repeats. These proteins are part of the U3 ribonucleoprotein the yeast protein is called Utp12 or DIP2./Alg9-like mannosyltransferase family. Members of this family are mannosyltransferase enzymes. At least some members are localised in endoplasmic reticulum and involved in GPI anchor biosynthesis.
gene_ID=unitig189_369	CE9	Amidohydro_4	Amidohydrolase. This family of enzymes are a part of a large metal dependent hydrolase superfamily. The family includes Adenine deaminase EC:3.5.4.2 that hydrolyses adenine to form hypoxanthine and ammonia. Adenine deaminases reaction is important for adenine utilisation as a purine and also as a nitrogen source. This family also includes dihydroorotase and N-acetylglucosamine-6-phosphate deacety…
gene_ID=unitig189_372	GT48	Sugar_tr/MFS_1	Sugar (and other) transporter. /Major Facilitator Superfamily.
gene_ID=unitig189_397	CE1	Prenyltrans_1/Prenyltrans_2	Prenyltransferase-like. /Prenyltransferase-like.
gene_ID=unitig189_425	AA3	Amidase/DAO	Amidase. /FAD dependent oxidoreductase. This family includes various FAD dependent oxidoreductases: Glycerol-3-phosphate dehydrogenase EC:1.1.99.5, Sarcosine oxidase beta subunit EC:1.5.3.1, D-alanine oxidase EC:1.4.99.1, D-aspartate oxidase EC:1.4.3.1.
gene_ID=unitig189_431	GT31/CBM51	Metallopep/Adaptin_N	Putative peptidase family. This family of proteins is functionally uncharacterized. However, it does contain an HEXXH motif characteristic of metallopeptidases. This protein is found in bacteria and eukaryotes. Proteins in this family are typically between 625 to 773 amino acids in length./Adaptin N terminal region. This family consists of the N terminal region of various alpha, beta and gamma su…
gene_ID=unitig189_441	CBM13	HSP70/MreB_Mbl	Hsp70 protein. Hsp70 chaperones help to fold many proteins. Hsp70 assisted folding involves repeated cycles of substrate binding and release. Hsp70 activity is ATP dependent. Hsp70 proteins are made up of two regions: the amino terminus is the ATPase domain and the carboxyl terminus is the substrate binding region./MreB/Mbl protein. This family consists of bacterial MreB and Mbl proteins as well …
gene_ID=unitig189_444	GT15	Glyco_transf_15/Glyco_transf_15/Glyco_transf_15	Glycolipid 2-alpha-mannosyltransferase. This is a family of alpha-1,2 mannosyl-transferases involved in N-linked and O-linked glycosylation of proteins. Some of the enzymes in this family have been shown to be involved in O- and N-linked glycan modifications in the Golgi./Glycolipid 2-alpha-mannosyltransferase. This is a family of alpha-1,2 mannosyl-transferases involved in N-linked and O-linked …
gene_ID=unitig189_447	GT41	TPR_11/PPP5/Metallophos	TPR repeat. /PPP5 TPR repeat region. This region is specific to the PPP5 subfamily of serine/threonine phosphatases and contains TPR repeats./Calcineurin-like phosphoesterase. This family includes a diverse range of phosphoesterases, including protein phosphoserine phosphatases, nucleotidases, sphingomyelin phosphodiesterases and 2'-3' cAMP phosphodiesterases as well as nucleases such as bacteria…
gene_ID=unitig189_449	GH16	Glyco_hydro_16	Glycosyl hydrolases family 16.
gene_ID=unitig189_450	GH16	Glyco_hydro_16	Glycosyl hydrolases family 16.
gene_ID=unitig189_458	CE4	OHCU_decarbox	OHCU decarboxylase. The proteins in this family are OHCU decarboxylase - enzymes of the purine catabolism that catalyze the conversion of OHCU into S(+)-allantoin. This is the third step of the conversion of uric acid (a purine derivative) to allantoin. Step one is catalyzed by urate oxidase (pfam01014) and step two is catalyzed by HIUases (pfam00576).
gene_ID=unitig189_459	GH10	Epimerase/NmrA/NAD_binding_10	NAD dependent epimerase/dehydratase family. This family of proteins utilise NAD as a cofactor. The proteins in this family use nucleotide-sugar substrates for a variety of chemical reactions./NmrA-like family. NmrA is a negative transcriptional regulator involved in the post-translational modification of the transcription factor AreA. NmrA is part of a system controlling nitrogen metabolite repre…
gene_ID=unitig189_463	GT83	Miro/Ras/PAP2	Miro-like protein. Mitochondrial Rho proteins (Miro-1, and Miro-2), are atypical Rho GTPases. They have a unique domain organisation, with tandem GTP-binding domains and two EF hand domains (pfam00036), that may bind calcium. They are also larger than classical small GTPases. It has been proposed that they are involved in mitochondrial homeostasis and apoptosis./Ras family. Includes sub-families …
gene_ID=unitig189_465	GT8	Glyco_transf_8	Glycosyl transferase family 8. This family includes enzymes that transfer sugar residues to donor molecules. Members of this family are involved in lipopolysaccharide biosynthesis and glycogen synthesis. This family includes Lipopolysaccharide galactosyltransferase, lipopolysaccharide glucosyltransferase 1, and glycogenin glucosyltransferase.
gene_ID=unitig189_466	CE11	DEAD/Helicase_C	DEAD/DEAH box helicase. Members of this family include the DEAD and DEAH box helicases. Helicases are involved in unwinding nucleic acids. The DEAD box helicases are involved in various aspects of RNA metabolism, including nuclear transcription, pre mRNA splicing, ribosome bio_	genesis, nucleocytoplasmic transport, translation, RNA decay and organellar _	gene expression./Helicase conserved C-terminal domain. The Prosite family is restricted to DEAD/H helicases, whereas this domain family is found in a wide variety of helicases and helicase related proteins. It may be that this is not an autonomously folding unit, but an integral part of the helicase.
gene_ID=unitig189_483	GT48	Sugar_tr	Sugar (and other) transporter.
gene_ID=unitig189_488	GH16	SKN1/SKN1	Beta-glucan synthesis-associated protein (SKN1). This family consists of the beta-glucan synthesis-associated proteins KRE6 and SKN1. Beta1,6-Glucan is a key component of the yeast cell wall, interconnecting cell wall proteins, beta1,3-glucan, and chitin. It has been postulated that the synthesis of beta1,6-glucan begins in the endoplasmic reticulum with the formation of protein-bound primer stru…
gene_ID=unitig189_489	GT2	ketoacyl-synt/Ketoacyl-synt_C	Beta-ketoacyl synthase, N-terminal domain. The structure of beta-ketoacyl synthase is similar to that of the thiolase family (pfam00108) and also chalcone synthase. The active site of beta-ketoacyl synthase is located between the N and C-terminal domains. The N-terminal domain contains most of the structures involved in dimer formation and also the active site cysteine./Beta-ketoacyl synthase, C-…
gene_ID=unitig189_491	GT50	Cyclin_N	Cyclin, N-terminal domain. Cyclins regulate cyclin dependent kinases (CDKs). Human cyclin-O is a Uracil-DNA glycosylase that is related to other cyclins. Cyclins contain two domains of similar all-alpha fold, of which this family corresponds with the N-terminal domain.
gene_ID=unitig189_492	GH18	Na_Ca_ex	Sodium/calcium exchanger protein. This is a family of sodium/calcium exchanger integral membrane proteins. This family covers the integral membrane regions of the proteins. Sodium/calcium exchangers regulate intracellular Ca2+ concentrations in many cells; cardiac myocytes, epithelial cells, neurons retinal rod photoreceptors and smooth muscle cells. Ca2+ is moved into or out of the cytosol depen…
gene_ID=unitig189_495	GH38	Glyco_hydro_38/Alpha-mann_mid/Glyco_hydro_38C/SBDS/SBDS_C	Glycosyl hydrolases family 38 N-terminal domain. Glycosyl hydrolases are key enzymes of carbohydrate metabolism./Alpha mannosidase, middle domain. Members of this family adopt a structure consisting of three alpha helices, in an immunoglobulin/albumin-binding domain-like fold. They are predominantly found in the enzyme alpha-mannosidase./Glycosyl hydrolases family 38 C-terminal domain. Glycosyl h…
gene_ID=unitig189_499	GT90	Thioredoxin	Thioredoxin. Thioredoxins are small enzymes that participate in redox reactions, via the reversible oxidation of an active centre disulfide bond. Some members with only the active site are not separated from the noise.
gene_ID=unitig189_503	GT1	PH	PH domain. PH stands for pleckstrin homology.
gene_ID=unitig189_515	GH76	ADH_N/ADH_zinc_N	Alcohol dehydrogenase GroES-like domain. This is the catalytic domain of alcohol dehydrogenases. Many of them contain an inserted zinc binding domain. This domain has a GroES-like structure./Zinc-binding dehydrogenase.
gene_ID=unitig189_516	GT57	WAC_Acf1_DNA_bd/DDT	ATP-utilising chromatin assembly and remodelling N-terminal. ACF (for ATP-utilising chromatin assembly and remodelling factor) is a chromatin-remodelling complex that catalyzes the ATP-dependent assembly of periodic nucleosome arrays. The WAC (WSTF/Acf1/cbp146) domain is an approximately 110-residue module present at the N-termini of Acf-1related proteins in a variety of organisms. The DNA-bindin…
gene_ID=unitig189_520	GT87/CE11	DEAD/Helicase_C/NUDIX	DEAD/DEAH box helicase. Members of this family include the DEAD and DEAH box helicases. Helicases are involved in unwinding nucleic acids. The DEAD box helicases are involved in various aspects of RNA metabolism, including nuclear transcription, pre mRNA splicing, ribosome bio_	genesis, nucleocytoplasmic transport, translation, RNA decay and organellar _	gene expression./Helicase conserved C-terminal domain. The Prosite family is restricted to DEAD/H helicases, whereas this domain family is found in a wide variety of helicases and helicase related proteins. It may be that this is not an autonomously folding unit, but an integral part of the helicase./NUDIX domain.
gene_ID=unitig189_535	GH84	Peptidase_M24/SPT16/Rtt106	Metallopeptidase family M24. This family contains metallopeptidases. It also contains non-peptidase homologues such as the N terminal domain of Spt16 which is a histone H3-H4 binding module./FACT complex subunit (SPT16/CDC68). Proteins in this family are subunits the FACT complex. The FACT complex plays a role in transcription initiation and promotes binding of TATA-binding protein (TBP) to a TAT…
gene_ID=unitig189_550	CE11	Med20/DEAD/Helicase_C/DUF4217	TATA-binding related factor (TRF) of subunit 20 of Mediator complex. This family of proteins is related to TATA-binding protein (TBP). TBP is a highly conserved RNA polymerase II _	general transcription factor that binds to the core promoter and initiates assembly of the preinitiation complex. Human TRF has been shown to associate with an RNA polymerase II-SRB complex. This Med20 subunit of Mediator is found in the non-essential part of the head./DEAD/DEAH box helicase. Members of this family include the DEAD and DEAH box helicases. Helicases are involved in unwinding nucle…	genesis, nucleocytoplasmic transport, translation, RNA decay and organellar _	gene expression./Helicase conserved C-terminal domain. The Prosite family is restricted to DEAD/H helicases, whereas this domain family is found in a wide variety of helicases and helicase related proteins. It may be that this is not an autonomously folding unit, but an integral part of the helicase./Domain of unknown function (DUF4217). This short domain is found at the C-terminus of many helica…
gene_ID=unitig189_561	CE11	HIRAN/SNF2_N/zf-RING_2/Helicase_C	HIRAN domain. The HIRAN domain (HIP116, Rad5p N-terminal) is found in the N-terminal regions of the SWI2/SNF2 proteins typified by HIP116 and Rad5p. The HIRAN domain is found as a standalone protein in several bacteria and prophages, or fused to other catalytic domains, such as a nuclease of the restriction endonuclease fold and TDP-1like DNA phosphoesterases, in the eukaryotes. It has been predi…
gene_ID=unitig189_567	CE11	Helicase_C/HA2	Helicase conserved C-terminal domain. The Prosite family is restricted to DEAD/H helicases, whereas this domain family is found in a wide variety of helicases and helicase related proteins. It may be that this is not an autonomously folding unit, but an integral part of the helicase./Helicase associated domain (HA2). This presumed domain is about 90 amino acid residues in length. It is found is a…
gene_ID=unitig189_572	GH65	HAD_2	Haloacid dehalogenase-like hydrolase.
gene_ID=unitig189_575	GH76	Glyco_hydro_76	Glycosyl hydrolase family 76. Family of alpha-1,6-mannanases.
gene_ID=unitig189_579	GH18	Glyco_hydro_18	Glycosyl hydrolases family 18.
gene_ID=unitig189_581	GT1	FYVE/Cpn60_TCP1/PIP5K	FYVE zinc finger. The FYVE zinc finger is named after four proteins that it has been found in: Fab1, YOTB/ZK632.12, Vac1, and EEA1. The FYVE finger has been shown to bind two Zn++ ions. The FYVE finger has eight potential zinc coordinating cysteine positions. Many members of this family also include two histidines in a motif R+HHC+XCG, where + represents a charged residue and X any residue. We ha…
gene_ID=unitig189_593	GH12	Peptidase_M16	Insulinase (Peptidase family M16).
gene_ID=unitig189_598	CBM21/GH92	CBM_21/adh_short/adh_short_C2	Putative phosphatase regulatory subunit. This family consists of several eukaryotic proteins that are thought to be involved in the regulation of glycogen metabolism. For instance, the mouse PTG protein has been shown to interact with glycogen synthase, phosphorylase kinase, phosphorylase a: these three enzymes have key roles in the regulation of glycogen metabolism. PTG also binds the catalytic …
gene_ID=unitig189_635	GH130	FAD_binding_6/NAD_binding_1	Oxidoreductase FAD-binding domain. /Oxidoreductase NAD-binding domain. Xanthine dehydrogenases, that also bind FAD/NAD, have essentially no similarity.
gene_ID=unitig189_642	CE11	DEAD/Helicase_C	DEAD/DEAH box helicase. Members of this family include the DEAD and DEAH box helicases. Helicases are involved in unwinding nucleic acids. The DEAD box helicases are involved in various aspects of RNA metabolism, including nuclear transcription, pre mRNA splicing, ribosome bio_	genesis, nucleocytoplasmic transport, translation, RNA decay and organellar _	gene expression./Helicase conserved C-terminal domain. The Prosite family is restricted to DEAD/H helicases, whereas this domain family is found in a wide variety of helicases and helicase related proteins. It may be that this is not an autonomously folding unit, but an integral part of the helicase.
gene_ID=unitig189_643	GT1	FYVE	FYVE zinc finger. The FYVE zinc finger is named after four proteins that it has been found in: Fab1, YOTB/ZK632.12, Vac1, and EEA1. The FYVE finger has been shown to bind two Zn++ ions. The FYVE finger has eight potential zinc coordinating cysteine positions. Many members of this family also include two histidines in a motif R+HHC+XCG, where + represents a charged residue and X any residue. We ha…
gene_ID=unitig189_645	GT39	PMT/MIR	Dolichyl-phosphate-mannose-protein mannosyltransferase. This is a family of Dolichyl-phosphate-mannose-protein mannosyltransferase proteins EC:2.4.1.109. These proteins are responsible for O-linked glycosylation of proteins, they catalyze the reaction:- Dolichyl phosphate D-mannose + protein <=> dolichyl phosphate + O-D-mannosyl-protein. Also in this family is the Drosophila rotated abdomen prote…
gene_ID=unitig189_659	CE10	FMO-like/Pyr_redox_3	Flavin-binding monooxygenase-like. This family includes FMO proteins, cyclohexanone mono-oxygenase and a number of different mono-oxygenases./Pyridine nucleotide-disulphide oxidoreductase.
gene_ID=unitig189_685	GH55	Cupin_8/Cupin_8	Cupin-like domain. This cupin like domain shares similarity to the JmjC domain./Cupin-like domain. This cupin like domain shares similarity to the JmjC domain.
gene_ID=unitig189_686	GT50	Cyclin_N	Cyclin, N-terminal domain. Cyclins regulate cyclin dependent kinases (CDKs). Human cyclin-O is a Uracil-DNA glycosylase that is related to other cyclins. Cyclins contain two domains of similar all-alpha fold, of which this family corresponds with the N-terminal domain.
gene_ID=unitig191_4	CE14	Flavin_Reduct	Flavin reductase like domain. This is a flavin reductase family consisting of enzymes known to be flavin reductases as well as various oxidoreductase and monooxygenase components. VlmR is a flavin reductase that functions in a two-component enzyme system to provide isobutylamine N-hydroxylase with reduced flavin and may be involved in the synthesis of valanimycin. SnaC is a flavin reductase that …
gene_ID=unitig191_9	GT48	MFS_1	Major Facilitator Superfamily.
gene_ID=unitig191_11	CE11	SNF2_N/Helicase_C	SNF2 family N-terminal domain. This domain is found in proteins involved in a variety of processes including transcription regulation (e.g., SNF2, STH1, brahma, MOT1), DNA repair (e.g. ERCC6, RAD16, RAD5), DNA recombination (e.g. RAD54), and chromatin unwinding (e.g. ISWI) as well as a variety of other proteins with little functional information (e.g. lodestar, ETL1)./Helicase conserved C-termina…
gene_ID=unitig191_12	GT66	Pro_isomerase	Cyclophilin type peptidyl-prolyl cis-trans isomerase/CLD. The peptidyl-prolyl cis-trans isomerases, also known as cyclophilins, share this domain of about 109 amino acids. Cyclophilins have been found in all organisms studied so far and catalyze peptidyl-prolyl isomerisation during which the peptide bond preceding proline (the peptidyl-prolyl bond) is stabilised in the cis conformation. Mammalian…
gene_ID=unitig191_14	GH84	Peptidase_M24	Metallopeptidase family M24. This family contains metallopeptidases. It also contains non-peptidase homologues such as the N terminal domain of Spt16 which is a histone H3-H4 binding module.
gene_ID=unitig191_16	GT31	Adaptin_N/Coatamer_beta_C	Adaptin N terminal region. This family consists of the N terminal region of various alpha, beta and gamma subunits of the AP-1, AP-2 and AP-3 adaptor protein complexes. The adaptor protein (AP) complexes are involved in the formation of clathrin-coated pits and vesicles. The N-terminal region of the various adaptor proteins (APs) is constant by comparison to the C-terminal which is variable withi…
gene_ID=unitig191_18	GT48	MFS_1	Major Facilitator Superfamily.
gene_ID=unitig191_20	GT48	Sugar_tr/MFS_1/MFS_1	Sugar (and other) transporter. /Major Facilitator Superfamily. /Major Facilitator Superfamily.
gene_ID=unitig191_25	GH47	Mmp37	Mitochondrial matrix Mmp37. MMp37 is a mitochondrial matrix protein that functions in the translocation of proteins across the mitochondrial inner membrane. It has been shown that MMP37 proteins possess the NTase fold but they have only one active site carboxylate and thus probably are not able to carry out enzymatic reaction. These potentially non-active members of NTase fold superfamily may bin…
gene_ID=unitig191_40	AA6/GH130	Flavodoxin_1/FAD_binding_1/NAD_binding_1	Flavodoxin. /FAD binding domain. This domain is found in sulfite reductase, NADPH cytochrome P450 reductase, Nitric oxide synthase and methionine synthase reductase./Oxidoreductase NAD-binding domain. Xanthine dehydrogenases, that also bind FAD/NAD, have essentially no similarity.
gene_ID=unitig191_47	GT1	PH/Oxysterol_BP	PH domain. PH stands for pleckstrin homology./Oxysterol-binding protein.
gene_ID=unitig191_74	GT2/GT60	His_Phos_1/RRM_1/RRM_6/2OG-FeII_Oxy_3	Histidine phosphatase superfamily (branch 1). The histidine phosphatase superfamily is so named because catalysis centres on a conserved His residue that is transiently phosphorylated during the catalytic cycle. Other conserved residues contribute to a 'phosphate pocket' and interact with the phospho group of substrate before, during and after its transfer to the His residue. Structure and sequen…
gene_ID=unitig191_122	GT91	DUF3589	Protein of unknown function (DUF3589). This family of proteins is found in eukaryotes. Proteins in this family are typically between 541 and 717 amino acids in length. The function of this family is not known,
gene_ID=unitig191_133	GH5	Cellulase	Cellulase (glycosyl hydrolase family 5).
gene_ID=unitig191_144	GT48	AA_permease/AA_permease_2	Amino acid permease. /Amino acid permease.
gene_ID=unitig191_152	GT25	TPT	Triose-phosphate Transporter family. This family includes transporters with a specificity for triose phosphate.
gene_ID=unitig191_168	GT4	Abhydrolase_6/Abhydrolase_1	Alpha/beta hydrolase family. This family contains alpha/beta hydrolase enzymes of diverse specificity./alpha/beta hydrolase fold. This catalytic domain is found in a very wide range of enzymes.
gene_ID=unitig191_169	AA1	Cu-oxidase_3/Cu-oxidase/Cu-oxidase_2	Multicopper oxidase. This entry contains many divergent copper oxidase-like domains that are not recognised by the pfam00394 model./Multicopper oxidase. Many of the proteins in this family contain multiple similar copies of this plastocyanin-like domain./Multicopper oxidase. This entry contains many divergent copper oxidase-like domains that are not recognised by the pfam00394 model.
gene_ID=unitig191_173	GH32	Ferric_reduct/FAD_binding_8/NAD_binding_6	Ferric reductase like transmembrane component. This family includes a common region in the transmembrane proteins mammalian cytochrome B-245 heavy chain (gp9-1phox), ferric reductase transmembrane component in yeast and respiratory burst oxidase from mouse-ear cress. This may be a family of flavocytochromes capable of moving electrons across the plasma membrane. The Frp1 protein from S. pombe is …	gene codes for the beta chain of cytochrome B-245 and cytochrome B-245 is missing from patients with the disease./FAD-binding domain. /Ferric reductase NAD binding domain.
gene_ID=unitig191_177	GH43	SRF-TF	SRF-type transcription factor (DNA-binding and dimerisation domain).
gene_ID=unitig191_190	GH63	Glyco_hydro_63	Mannosyl oligosaccharide glucosidase. This is a family of eukaryotic enzymes belonging to glycosyl hydrolase family 63. They catalyze the specific cleavage of the non-reducing terminal glucose residue from Glc(3)Man(9)GlcNAc(2). Mannosyl oligosaccharide glucosidase EC:3.2.1.106 is the first enzyme in the N-linked oligosaccharide processing pathway.
gene_ID=unitig191_191	CE1	Lactamase_B	Metallo-beta-lactamase superfamily.
gene_ID=unitig191_195	GT2	BCDHK_Adom3/HATPase_c	Mitochondrial branched-chain alpha-ketoacid dehydrogenase kinase. Catabolism and synthesis of leucine, isoleucine and valine are finely balanced, allowing the body to make the most of dietary input but removing excesses to prevent toxic build-up of their corresponding keto-acids. This is the butyryl-CoA dehydrogenase, subunit A domain 3, a largely alpha-helical bundle of the enzyme BCDHK. This en…
gene_ID=unitig191_201	GH37	Trehalase_Ca-bi/Trehalase/polyprenyl_synt	Neutral trehalase Ca2+ binding domain. Neutral trehalases mobilise trehalose accumulated by fungal cells as a protective and storage carbohydrate. This family represents a calcium-binding domain similar to EF hand. Residues 97 and 108 in S. pombe neutral trehalase have been implicated in this interaction. It is thought that this domain may provide a _	general mechanism for regulating neutral trehalase activity in yeasts and filamentous fungi./Trehalase. Trehalase (EC:3.2.1.28) is known to recycle trehalose to glucose. Trehalose is a physiological hallmark of heat-shock response in yeast and protects of proteins and membranes against a variety of stresses. This family is found in conjunction with pfam07492 in fungi./Polyprenyl synthetase.
gene_ID=unitig191_242	GT22	Glyco_transf_22	Alg9-like mannosyltransferase family. Members of this family are mannosyltransferase enzymes. At least some members are localised in endoplasmic reticulum and involved in GPI anchor biosynthesis.
gene_ID=unitig191_248	CBM6	Phosphodiest	Type I phosphodiesterase / nucleotide pyrophosphatase. This family consists of phosphodiesterases, including human plasma-cell membrane glycoprotein PC-1 / alkaline phosphodiesterase i / nucleotide pyrophosphatase (nppase). These enzymes catalyze the cleavage of phosphodiester and phosphosulfate bonds in NAD, deoxynucleotides and nucleotide sugars. Also in this family is ATX an autotaxin, tumour …
gene_ID=unitig191_258	CE11	DEAD/Helicase_C/DUF4217	DEAD/DEAH box helicase. Members of this family include the DEAD and DEAH box helicases. Helicases are involved in unwinding nucleic acids. The DEAD box helicases are involved in various aspects of RNA metabolism, including nuclear transcription, pre mRNA splicing, ribosome bio_	genesis, nucleocytoplasmic transport, translation, RNA decay and organellar _	gene expression./Helicase conserved C-terminal domain. The Prosite family is restricted to DEAD/H helicases, whereas this domain family is found in a wide variety of helicases and helicase related proteins. It may be that this is not an autonomously folding unit, but an integral part of the helicase./Domain of unknown function (DUF4217). This short domain is found at the C-terminus of many helica…
gene_ID=unitig191_276	CE11	DEAD/Helicase_C/DUF4217	DEAD/DEAH box helicase. Members of this family include the DEAD and DEAH box helicases. Helicases are involved in unwinding nucleic acids. The DEAD box helicases are involved in various aspects of RNA metabolism, including nuclear transcription, pre mRNA splicing, ribosome bio_	genesis, nucleocytoplasmic transport, translation, RNA decay and organellar _	gene expression./Helicase conserved C-terminal domain. The Prosite family is restricted to DEAD/H helicases, whereas this domain family is found in a wide variety of helicases and helicase related proteins. It may be that this is not an autonomously folding unit, but an integral part of the helicase./Domain of unknown function (DUF4217). This short domain is found at the C-terminus of many helica…
gene_ID=unitig191_278	CBM50	Y_phosphatase3/DUF3112	Tyrosine phosphatase family. This family is closely related to the pfam00102 and pfam00782 families./Protein of unknown function (DUF3112). This eukaryotic family of proteins has no known function.
gene_ID=unitig191_280	GH81	Glyco_hydro_81	Glycosyl hydrolase family 81. Family of eukaryotic beta-1,3-glucanases. Within the Aspergillus fumigatus protein two perfectly conserved Glu residues (E550 or E554) have been proposed as putative nucleophiles of the active site of the Engl1 endoglucanase, while the proton donor would be D475. The endo-beta-1,3-glucanase activity is essential for efficient spore release.
gene_ID=unitig191_281	AA3	Pyr_redox_2	Pyridine nucleotide-disulphide oxidoreductase. This family includes both class I and class II oxidoreductases and also NADH oxidases and peroxidases. This domain is actually a small NADH binding domain within a larger FAD binding domain.
gene_ID=unitig191_283	GT48	MFS_1	Major Facilitator Superfamily.
gene_ID=unitig191_291	GT48	RVT_1	Reverse transcriptase (RNA-dependent DNA polymerase). A reverse transcriptase _	gene is usually indicative of a mobile element such as a retrotransposon or retrovirus. Reverse transcriptases occur in a variety of mobile elements, including retrotransposons, retroviruses, group II introns, bacterial msDNAs, hepadnaviruses, and caulimoviruses.
gene_ID=unitig191_293	GT34	p450	Cytochrome P450. Cytochrome P450s are haem-thiolate proteins involved in the oxidative degradation of various compounds. They are particularly well known for their role in the degradation of environmental toxins and mutagens. They can be divided into 4 classes, according to the method by which electrons from NAD(P)H are delivered to the catalytic site. Sequence conservation is relatively low with…	general topography and structural fold are highly conserved. The conserved core is composed of a coil termed the 'meander', a four-helix bundle, helices J and K, and two sets of beta-sheets. These constitute the haem-binding loop (with an absolutely conserved cysteine that serves as the 5th ligand for the haem iron), the proton-transfer groove and the absolutely conserved EXXR motif in helix K. W…	general enzymatic function is to catalyze regiospecific and stereospecific oxidation of non-activated hydrocarbons at physiological temperatures.
gene_ID=unitig191_294	GT30	NAD_binding_2/6PGD	NAD binding domain of 6-phosphogluconate dehydrogenase. The NAD binding domain of 6-phosphogluconate dehydrogenase adopts a Rossmann fold./6-phosphogluconate dehydrogenase, C-terminal domain. This family represents the C-terminal all-alpha domain of 6-phosphogluconate dehydrogenase. The domain contains two structural repeats of 5 helices each.
gene_ID=unitig191_308	GT90	Thioredoxin/Thioredoxin	Thioredoxin. Thioredoxins are small enzymes that participate in redox reactions, via the reversible oxidation of an active centre disulfide bond. Some members with only the active site are not separated from the noise./Thioredoxin. Thioredoxins are small enzymes that participate in redox reactions, via the reversible oxidation of an active centre disulfide bond. Some members with only the active …
gene_ID=unitig191_311	GH76	ADH_N/ADH_zinc_N	Alcohol dehydrogenase GroES-like domain. This is the catalytic domain of alcohol dehydrogenases. Many of them contain an inserted zinc binding domain. This domain has a GroES-like structure./Zinc-binding dehydrogenase.
gene_ID=unitig191_313	GH109	GFO_IDH_MocA	Oxidoreductase family, NAD-binding Rossmann fold. This family of enzymes utilise NADP or NAD. This family is called the GFO/IDH/MOCA family in swiss-prot.
gene_ID=unitig191_320	CE11	SNF2_N/Helicase_C/Bromodomain	SNF2 family N-terminal domain. This domain is found in proteins involved in a variety of processes including transcription regulation (e.g., SNF2, STH1, brahma, MOT1), DNA repair (e.g. ERCC6, RAD16, RAD5), DNA recombination (e.g. RAD54), and chromatin unwinding (e.g. ISWI) as well as a variety of other proteins with little functional information (e.g. lodestar, ETL1)./Helicase conserved C-termina…
gene_ID=unitig191_321	GT48	AA_permease_2/AA_permease	Amino acid permease. /Amino acid permease.
gene_ID=unitig191_325	GT31	Adaptin_N/Cnd1	Adaptin N terminal region. This family consists of the N terminal region of various alpha, beta and gamma subunits of the AP-1, AP-2 and AP-3 adaptor protein complexes. The adaptor protein (AP) complexes are involved in the formation of clathrin-coated pits and vesicles. The N-terminal region of the various adaptor proteins (APs) is constant by comparison to the C-terminal which is variable withi…
gene_ID=unitig191_328	GT32	Gly_transf_sug	Glycosyltransferase sugar-binding region containing DXD motif. The DXD motif is a short conserved motif found in many families of glycosyltransferases, which add a range of different sugars to other sugars, phosphates and proteins. DXD-containing glycosyltransferases all use nucleoside diphosphate sugars as donors and require divalent cations, usually manganese. The DXD motif is expected to play …
gene_ID=unitig191_329	CBM51	LIP	Secretory lipase. These lipases are expressed and secreted during the infection cycle of these pathogens. In particular, C. albicans has a large number of different lipases, possibly reflecting broad lipolytic activity, which may contribute to the persistence and virulence of C. albicans in human tissue.
gene_ID=unitig191_333	CBM48	DnaJ/DnaJ_CXXCXGXG	DnaJ domain. DnaJ domains (J-domains) are associated with hsp70 heat-shock system and it is thought that this domain mediates the interaction. DnaJ-domain is therefore part of a chaperone (protein folding) system. The T-antigens, although not in Prosite are confirmed as DnaJ containing domains from literature./DnaJ central domain. The central cysteine-rich (CR) domain of DnaJ proteins contains fo…
gene_ID=unitig191_346	GT90	Thioredoxin	Thioredoxin. Thioredoxins are small enzymes that participate in redox reactions, via the reversible oxidation of an active centre disulfide bond. Some members with only the active site are not separated from the noise.
gene_ID=unitig191_348	GH1	PMI_typeI	Phosphomannose isomerase type I. This is a family of Phosphomannose isomerase type I enzymes (EC 5.3.1.8).
gene_ID=unitig191_364	GT48	RVT_1	Reverse transcriptase (RNA-dependent DNA polymerase). A reverse transcriptase _	gene is usually indicative of a mobile element such as a retrotransposon or retrovirus. Reverse transcriptases occur in a variety of mobile elements, including retrotransposons, retroviruses, group II introns, bacterial msDNAs, hepadnaviruses, and caulimoviruses.
gene_ID=unitig192_3	GH3/GT2/GH92	adh_short_C2/ketoacyl-synt/ACPS	Enoyl-(Acyl carrier protein) reductase. /Beta-ketoacyl synthase, N-terminal domain. The structure of beta-ketoacyl synthase is similar to that of the thiolase family (pfam00108) and also chalcone synthase. The active site of beta-ketoacyl synthase is located between the N and C-terminal domains. The N-terminal domain contains most of the structures involved in dimer formation and also the active …
gene_ID=unitig192_10	GT66	Pro_isomerase	Cyclophilin type peptidyl-prolyl cis-trans isomerase/CLD. The peptidyl-prolyl cis-trans isomerases, also known as cyclophilins, share this domain of about 109 amino acids. Cyclophilins have been found in all organisms studied so far and catalyze peptidyl-prolyl isomerisation during which the peptide bond preceding proline (the peptidyl-prolyl bond) is stabilised in the cis conformation. Mammalian…
gene_ID=unitig192_23	GT48	AA_permease/AA_permease_2	Amino acid permease. /Amino acid permease.
gene_ID=unitig192_37	GT31	Adaptin_N	Adaptin N terminal region. This family consists of the N terminal region of various alpha, beta and gamma subunits of the AP-1, AP-2 and AP-3 adaptor protein complexes. The adaptor protein (AP) complexes are involved in the formation of clathrin-coated pits and vesicles. The N-terminal region of the various adaptor proteins (APs) is constant by comparison to the C-terminal which is variable withi…
gene_ID=unitig192_38	CE11	DEAD/Helicase_C/DUF1998	DEAD/DEAH box helicase. Members of this family include the DEAD and DEAH box helicases. Helicases are involved in unwinding nucleic acids. The DEAD box helicases are involved in various aspects of RNA metabolism, including nuclear transcription, pre mRNA splicing, ribosome bio_	genesis, nucleocytoplasmic transport, translation, RNA decay and organellar _	gene expression./Helicase conserved C-terminal domain. The Prosite family is restricted to DEAD/H helicases, whereas this domain family is found in a wide variety of helicases and helicase related proteins. It may be that this is not an autonomously folding unit, but an integral part of the helicase./Domain of unknown function (DUF1998). This family of proteins are functionally uncharacterized. T…
gene_ID=unitig192_41	CBM13	HSP70/MreB_Mbl	Hsp70 protein. Hsp70 chaperones help to fold many proteins. Hsp70 assisted folding involves repeated cycles of substrate binding and release. Hsp70 activity is ATP dependent. Hsp70 proteins are made up of two regions: the amino terminus is the ATPase domain and the carboxyl terminus is the substrate binding region./MreB/Mbl protein. This family consists of bacterial MreB and Mbl proteins as well …
gene_ID=unitig192_43	GT48	AA_permease/AA_permease_2	Amino acid permease. /Amino acid permease.
gene_ID=unitig192_44	GT48	AA_permease_2/AA_permease	Amino acid permease. /Amino acid permease.
gene_ID=unitig192_52	CE11	PP2C/DEAD/Helicase_C	Protein phosphatase 2C. Protein phosphatase 2C is a Mn++ or Mg++ dependent protein serine/threonine phosphatase./DEAD/DEAH box helicase. Members of this family include the DEAD and DEAH box helicases. Helicases are involved in unwinding nucleic acids. The DEAD box helicases are involved in various aspects of RNA metabolism, including nuclear transcription, pre mRNA splicing, ribosome bio_	genesis, nucleocytoplasmic transport, translation, RNA decay and organellar _	gene expression./Helicase conserved C-terminal domain. The Prosite family is restricted to DEAD/H helicases, whereas this domain family is found in a wide variety of helicases and helicase related proteins. It may be that this is not an autonomously folding unit, but an integral part of the helicase.
gene_ID=unitig192_60	GT48	Sugar_tr/MFS_1	Sugar (and other) transporter. /Major Facilitator Superfamily.
gene_ID=unitig192_66	GH84	AMP_N/Peptidase_M24	Aminopeptidase P, N-terminal domain. This domain is structurally very similar to the creatinase N-terminal domain (pfam01321). However, little or no sequence similarity exists between the two families./Metallopeptidase family M24. This family contains metallopeptidases. It also contains non-peptidase homologues such as the N terminal domain of Spt16 which is a histone H3-H4 binding module.
gene_ID=unitig192_77	GH3	Glyco_hydro_3/Glyco_hydro_3_C/Fn3-like	Glycosyl hydrolase family 3 N terminal domain. /Glycosyl hydrolase family 3 C-terminal domain. This domain is involved in catalysis and may be involved in binding beta-glucan. This domain is found associated with pfam00933./Fibronectin type III-like domain. This domain has a fibronectin type III-like structure. It is often found in association with pfam00933 and pfam01915. Its function is unknown.
gene_ID=unitig192_78	GH5	Cellulase	Cellulase (glycosyl hydrolase family 5).
gene_ID=unitig192_79	GT48	MFS_1/Sugar_tr/MFS_1	Major Facilitator Superfamily. /Sugar (and other) transporter. /Major Facilitator Superfamily.
gene_ID=unitig192_80	GT48	MFS_1	Major Facilitator Superfamily.
gene_ID=unitig192_97	GH85	DUF862	PPPDE putative peptidase domain. The PPPDE superfamily (after Permuted Papain fold Peptidases of DsRNA viruses and Eukaryotes), consists of predicted thiol peptidases with a circularly permuted papain-like fold. The inference of the likely DUB function of the PPPDE superfamily proteins is based on the fusions of the catalytic domain to Ub-binding PUG (PUB)/UBA domains and a novel alpha-helical Ub…
gene_ID=unitig192_104	GT4	Abhydrolase_6/Abhydrolase_1	Alpha/beta hydrolase family. This family contains alpha/beta hydrolase enzymes of diverse specificity./alpha/beta hydrolase fold. This catalytic domain is found in a very wide range of enzymes.
gene_ID=unitig192_105	GT48	MFS_1/MFS_1/MFS_1	Major Facilitator Superfamily. /Major Facilitator Superfamily. /Major Facilitator Superfamily.
gene_ID=unitig192_107	CBM6	Phosphodiest	Type I phosphodiesterase / nucleotide pyrophosphatase. This family consists of phosphodiesterases, including human plasma-cell membrane glycoprotein PC-1 / alkaline phosphodiesterase i / nucleotide pyrophosphatase (nppase). These enzymes catalyze the cleavage of phosphodiester and phosphosulfate bonds in NAD, deoxynucleotides and nucleotide sugars. Also in this family is ATX an autotaxin, tumour …
gene_ID=unitig192_109	GT48	MFS_1	Major Facilitator Superfamily.
gene_ID=unitig192_112	GT31	PIG-H	GPI-GlcNAc transferase complex, PIG-H component. PIG-H is a family of conserved proteins that complexes with three other proteins to form the GPI-GnT (glycosylphosphatidylinositol anchor biosynthesis transferase) complex. It appears to be a peripheral membrane protein facing the cytoplasm involved in the first step in GPI anchor formation.
gene_ID=unitig192_138	CBM2	Peptidase_S8/P_proprotein	Subtilase family. Subtilases are a family of serine proteases. They appear to have independently and convergently evolved an Asp/Ser/His catalytic triad, like that found in the trypsin serine proteases (see pfam00089). Structure is an alpha/beta fold containing a 7-stranded parallel beta sheet, order 2314567./Proprotein convertase P-domain. A unique feature of the eukaryotic subtilisin-like propr…
gene_ID=unitig192_140	GT48	AA_permease/AA_permease_2	Amino acid permease. /Amino acid permease.
gene_ID=unitig192_146	GT90	Thioredoxin	Thioredoxin. Thioredoxins are small enzymes that participate in redox reactions, via the reversible oxidation of an active centre disulfide bond. Some members with only the active site are not separated from the noise.
gene_ID=unitig192_147	GH65	HAD_2/FSH1	Haloacid dehalogenase-like hydrolase. /Serine hydrolase (FSH1). This is a family of serine hydrolases.
gene_ID=unitig192_154	GT31	Adaptin_N	Adaptin N terminal region. This family consists of the N terminal region of various alpha, beta and gamma subunits of the AP-1, AP-2 and AP-3 adaptor protein complexes. The adaptor protein (AP) complexes are involved in the formation of clathrin-coated pits and vesicles. The N-terminal region of the various adaptor proteins (APs) is constant by comparison to the C-terminal which is variable withi…
gene_ID=unitig192_166	AA3	DAO	FAD dependent oxidoreductase. This family includes various FAD dependent oxidoreductases: Glycerol-3-phosphate dehydrogenase EC:1.1.99.5, Sarcosine oxidase beta subunit EC:1.5.3.1, D-alanine oxidase EC:1.4.99.1, D-aspartate oxidase EC:1.4.3.1.
gene_ID=unitig192_172	GT51	FHA/Pkinase/Pkinase_Tyr	FHA domain. The FHA (Forkhead-associated) domain is a phosphopeptide binding motif./Protein kinase domain. /Protein tyrosine kinase.
gene_ID=unitig192_176	GT22	Glyco_transf_22	Alg9-like mannosyltransferase family. Members of this family are mannosyltransferase enzymes. At least some members are localised in endoplasmic reticulum and involved in GPI anchor biosynthesis.
gene_ID=unitig192_181	CE11	DEAD/Helicase_C/DUF4217	DEAD/DEAH box helicase. Members of this family include the DEAD and DEAH box helicases. Helicases are involved in unwinding nucleic acids. The DEAD box helicases are involved in various aspects of RNA metabolism, including nuclear transcription, pre mRNA splicing, ribosome bio_	genesis, nucleocytoplasmic transport, translation, RNA decay and organellar _	gene expression./Helicase conserved C-terminal domain. The Prosite family is restricted to DEAD/H helicases, whereas this domain family is found in a wide variety of helicases and helicase related proteins. It may be that this is not an autonomously folding unit, but an integral part of the helicase./Domain of unknown function (DUF4217). This short domain is found at the C-terminus of many helica…
gene_ID=unitig192_182	CE11	DEAD/Sec63/DEAD/Sec63	DEAD/DEAH box helicase. Members of this family include the DEAD and DEAH box helicases. Helicases are involved in unwinding nucleic acids. The DEAD box helicases are involved in various aspects of RNA metabolism, including nuclear transcription, pre mRNA splicing, ribosome bio_	genesis, nucleocytoplasmic transport, translation, RNA decay and organellar _	gene expression./Sec63 Brl domain. This domain (also known as the Brl domain) is required for assembly of functional endoplasmic reticulum translocons./DEAD/DEAH box helicase. Members of this family include the DEAD and DEAH box helicases. Helicases are involved in unwinding nucleic acids. The DEAD box helicases are involved in various aspects of RNA metabolism, including nuclear transcription, p…	genesis, nucleocytoplasmic transport, translation, RNA decay and organellar _	gene expression./Sec63 Brl domain. This domain (also known as the Brl domain) is required for assembly of functional endoplasmic reticulum translocons.
gene_ID=unitig192_184	GH72	MMR_HSR1/FeoB_N/TGS/Dynamitin	50S ribosome-binding GTPase. The full-length GTPase protein is required for the complete activity of the protein of interacting with the 50S ribosome and binding of both adenine and guanine nucleotides, with a preference for guanine nucleotide./Ferrous iron transport protein B. Escherichia coli has an iron(II) transport system (feo) which may make an important contribution to the iron supply of t…
gene_ID=unitig192_189	GH16	Glyco_hydro_16/PFK/PFK	Glycosyl hydrolases family 16. /Phosphofructokinase. /Phosphofructokinase.
gene_ID=unitig192_194	GH5	DNA_pol_E_B	DNA polymerase alpha/epsilon subunit B. This family contains a number of DNA polymerase subunits. The B subunit of the DNA polymerase alpha plays an essential role at the initial stage of DNA replication in S. cerevisiae and is phosphorylated in a cell cycle-dependent manner. DNA polymerase epsilon is essential for cell viability and chromosomal DNA replication in budding yeast. In addition, DNA …
gene_ID=unitig192_202	GH18	tRNA-synt_1g/tRNA-synt_1/AAA	tRNA synthetases class I (M). This family includes methionyl tRNA synthetases./tRNA synthetases class I (I, L, M and V). Other tRNA synthetase sub-families are too dissimilar to be included./ATPase family associated with various cellular activities (AAA). AAA family proteins often perform chaperone-like functions that assist in the assembly, operation, or disassembly of protein complexes.
gene_ID=unitig192_207	GT9	CTP_transf_2	Cytidylyltransferase. This family includes: Cholinephosphate cytidylyltransferase. Glycerol-3-phosphate cytidylyltransferase.
gene_ID=unitig192_223	CBM51	LIP	Secretory lipase. These lipases are expressed and secreted during the infection cycle of these pathogens. In particular, C. albicans has a large number of different lipases, possibly reflecting broad lipolytic activity, which may contribute to the persistence and virulence of C. albicans in human tissue.
gene_ID=unitig192_224	GT48	ABC_membrane/ABC_tran/ABC_membrane/ABC_tran/AA_permease_2/AA_permease	ABC transporter transmembrane region. This family represents a unit of six transmembrane helices. Many members of the ABC transporter family (pfam00005) have two such regions./ABC transporter. ABC transporters for a large family of proteins responsible for translocation of a variety of compounds across biological membranes. ABC transporters are the largest family of proteins in many completely se…
gene_ID=unitig192_229	GT48	ELO/Sugar_tr/MFS_1	GNS1/SUR4 family. Members of this family are involved in long chain fatty acid elongation systems that produce the 26-carbon precursors for ceramide and sphingolipid synthesis. Predicted to be integral membrane proteins, in eukaryotes they are probably located on the endoplasmic reticulum. Yeast ELO3 affects plasma membrane H+-ATPase activity, and may act on a glucose-signaling pathway that contr…	genes that are transcriptionally regulated by glucose such as PMA1./Sugar (and other) transporter. /Major Facilitator Superfamily.
gene_ID=unitig192_231	GH5	Choline_kinase	Choline/ethanolamine kinase. Choline kinase catalyzes the committed step in the synthesis of phosphatidylcholine by the CDP-choline pathway. This alignment covers the protein kinase portion of the protein. The divergence of this family makes it very difficult to create a model that specifically predicts choline/ethanolamine kinases only. However if [add Pfam ID here for Choline_kinase_C] is also …
gene_ID=unitig192_238	GT71	Mannosyl_trans3	Mannosyltransferase putative. This family is conserved in fungi. Several members are annotated as being alpha-1,3-mannosyltransferase but this could not be confirmed.
gene_ID=unitig193_4	GH18	tRNA-synt_1/tRNA-synt_1g/tRNA-synt_1_2/Anticodon_1	tRNA synthetases class I (I, L, M and V). Other tRNA synthetase sub-families are too dissimilar to be included./tRNA synthetases class I (M). This family includes methionyl tRNA synthetases./Leucyl-tRNA synthetase, Domain 2. This is a family of the conserved region of Leucine-tRNA ligase or Leucyl-tRNA synthetase, EC:6.1.1.4./Anticodon-binding domain of tRNA. This domain is found mainly hydrophob…
gene_ID=unitig193_8	GH92	adh_short_C2/adh_short	Enoyl-(Acyl carrier protein) reductase. /short chain dehydrogenase. This family contains a wide variety of dehydrogenases.
gene_ID=unitig193_9	GT48	Grp1_Fun34_YaaH/AA_permease/AA_permease_2	GPR1/FUN34/yaaH family. The Ady2 protein in is required for acetate in Saccharomyces cerevisiae, and is probably an acetate transporter. A homologue in Yarrowia lipolytica (GPR1) has a role in acetic acid sensitivity./Amino acid permease. /Amino acid permease.
gene_ID=unitig193_10	CE11	SNF2_N/Helicase_C	SNF2 family N-terminal domain. This domain is found in proteins involved in a variety of processes including transcription regulation (e.g., SNF2, STH1, brahma, MOT1), DNA repair (e.g. ERCC6, RAD16, RAD5), DNA recombination (e.g. RAD54), and chromatin unwinding (e.g. ISWI) as well as a variety of other proteins with little functional information (e.g. lodestar, ETL1)./Helicase conserved C-termina…
gene_ID=unitig193_14	GT55	CorA	CorA-like Mg2+ transporter protein. The CorA transport system is the primary Mg2+ influx system of Salmonella typhimurium and Escherichia coli. CorA is virtually ubiquitous in the Bacteria and Archaea. There are also eukaryotic relatives of this protein. The family includes the MRS2 protein from yeast that is thought to be an RNA splicing protein. However its membership of this family suggests th…
gene_ID=unitig193_17	GH132	FCH	Fes/CIP4, and EFC/F-BAR homology domain. Alignment extended from. Highly alpha-helical. The cytosolic endocytic adaptor proteins in fungi carry this domain at the N-terminus; several of these have been referred to as muniscin proteins. These N-terminal BAR, N-BAR, and EFC/F-BAR domains are found in proteins that regulate membrane trafficking events by inducing membrane tubulation. The domain dime…
gene_ID=unitig193_35	GH28	Zn_clus	Fungal Zn(2)-Cys(6) binuclear cluster domain.
gene_ID=unitig193_39	GT2	Chitin_synth_1N/Chitin_synth_1/Chitin_synth_2/Glyco_trans_2_3	Chitin synthase N-terminal. This is the N-terminal domain of Chitin synthase (pfam01644)./Chitin synthase. This region is found commonly in chitin synthases classes I, II and III. Chitin a linear homopolymer of GlcNAc residues, it is an important component of the cell wall of fungi and is synthesised on the cytoplasmic surface of the cell membrane by membrane bound chitin synthases./Chitin syntha…
gene_ID=unitig193_51	GT9	CTP_transf_2	Cytidylyltransferase. This family includes: Cholinephosphate cytidylyltransferase. Glycerol-3-phosphate cytidylyltransferase.
gene_ID=unitig193_52	GT48	MFS_1	Major Facilitator Superfamily.
gene_ID=unitig193_57	GT48	DUF605	Vta1 like. Vta1 (VPS20-associated protein 1) is a positive regulator of Vps4. Vps4 is an ATPase that is required in the multivesicular body (MVB) sorting pathway to dissociate the endosomal sorting complex required for transport (ESCRT). Vta1 promotes correct assembly of Vps4 and stimulates its ATPase activity through its conserved Vta1/SBP1/LIP5 region.
gene_ID=unitig193_68	GT2/GT4	CMAS/Methyltransf_23	Mycolic acid cyclopropane synthetase. This family consist of Cyclopropane-fatty-acyl-phospholipid synthase or CFA synthase EC:2.1.1.79 this enzyme catalyze the reaction: S-adenosyl-L-methionine + phospholipid olefinic fatty acid <=> S-adenosyl-L-homocysteine + phospholipid cyclopropane fatty acid./Methyltransferase domain. This family appears to be a methyltransferase domain.
gene_ID=unitig193_73	AA3	Pyr_redox_2/Pyr_redox/Pyr_redox_dim	Pyridine nucleotide-disulphide oxidoreductase. This family includes both class I and class II oxidoreductases and also NADH oxidases and peroxidases. This domain is actually a small NADH binding domain within a larger FAD binding domain./Pyridine nucleotide-disulphide oxidoreductase. This family includes both class I and class II oxidoreductases and also NADH oxidases and peroxidases. This domain…
gene_ID=unitig193_82	GT50	Cyclin_N/Cyclin	Cyclin, N-terminal domain. Cyclins regulate cyclin dependent kinases (CDKs). Human cyclin-O is a Uracil-DNA glycosylase that is related to other cyclins. Cyclins contain two domains of similar all-alpha fold, of which this family corresponds with the N-terminal domain./Cyclin. This family includes many different cyclin proteins. Members include the G1/S-specific cyclin pas1, and the phosphate sys…
gene_ID=unitig193_108	GH76	ADH_N	Alcohol dehydrogenase GroES-like domain. This is the catalytic domain of alcohol dehydrogenases. Many of them contain an inserted zinc binding domain. This domain has a GroES-like structure.
gene_ID=unitig193_117	GT39	PMT/MIR	Dolichyl-phosphate-mannose-protein mannosyltransferase. This is a family of Dolichyl-phosphate-mannose-protein mannosyltransferase proteins EC:2.4.1.109. These proteins are responsible for O-linked glycosylation of proteins, they catalyze the reaction:- Dolichyl phosphate D-mannose + protein <=> dolichyl phosphate + O-D-mannosyl-protein. Also in this family is the Drosophila rotated abdomen prote…
gene_ID=unitig193_121	CBM35	PBP	Phosphatidylethanolamine-binding protein.
gene_ID=unitig193_124	GT48	Sugar_tr/MFS_1	Sugar (and other) transporter. /Major Facilitator Superfamily.
gene_ID=unitig193_128	GH28	Zn_clus/Fungal_trans	Fungal Zn(2)-Cys(6) binuclear cluster domain. /Fungal specific transcription factor domain.
gene_ID=unitig193_130	CE14	PIG-L	GlcNAc-PI de-N-acetylase. Members of this family are related to PIG-L an N-acetylglucosaminylphosphatidylinositol de-N-acetylase (EC:3.5.1.89) that catalyzes the second step in GPI biosynthesis.
gene_ID=unitig193_138	GT48/CE11	AA_permease_2/AA_permease/DEAD/Helicase_C	Amino acid permease. /Amino acid permease. /DEAD/DEAH box helicase. Members of this family include the DEAD and DEAH box helicases. Helicases are involved in unwinding nucleic acids. The DEAD box helicases are involved in various aspects of RNA metabolism, including nuclear transcription, pre mRNA splicing, ribosome bio_	genesis, nucleocytoplasmic transport, translation, RNA decay and organellar _	gene expression./Helicase conserved C-terminal domain. The Prosite family is restricted to DEAD/H helicases, whereas this domain family is found in a wide variety of helicases and helicase related proteins. It may be that this is not an autonomously folding unit, but an integral part of the helicase.
gene_ID=unitig193_149	GT71	Mannosyl_trans3	Mannosyltransferase putative. This family is conserved in fungi. Several members are annotated as being alpha-1,3-mannosyltransferase but this could not be confirmed.
gene_ID=unitig193_159	GH132	SUN	Beta-glucosidase (SUN family). Members of this family include Nca3, Sun4 and Sim1. This is a family of yeast proteins, involved in a diverse set of functions (DNA replication, aging, mitochondrial bio_	genesis and cell septation). BGLA from Candida wickerhamii has been characterized as a Beta-glucosidase EC:3.2.1.21.
gene_ID=unitig193_240	GH3	Glyco_hydro_3_C/Fn3-like	Glycosyl hydrolase family 3 C-terminal domain. This domain is involved in catalysis and may be involved in binding beta-glucan. This domain is found associated with pfam00933./Fibronectin type III-like domain. This domain has a fibronectin type III-like structure. It is often found in association with pfam00933 and pfam01915. Its function is unknown.
gene_ID=unitig193_241	GH3	Glyco_hydro_3/PA14	Glycosyl hydrolase family 3 N terminal domain. /PA14 domain. This domain forms an insert in bacterial beta-glucosidases and is found in other glycosidases, glycosyltransferases, proteases, amidases, yeast adhesins, and bacterial toxins, including anthrax protective antigen (PA). The domain also occurs in a Dictyostelium prespore-cell-inducing factor Psi and in fibrocystin, the mammalian protein w…
gene_ID=unitig193_247	GT41	Acetyltransf_1/RXT2_N	Acetyltransferase (GNAT) family. This family contains proteins with N-acetyltransferase functions such as Elp3-related proteins./RXT2-like, N-terminal. The family represents the N-terminal region of RXT2-like proteins. In S. cerevisiae, RXT2 has been demonstrated to be involved in conjugation with cellular fusion (mating) and invasive growth. A high throughput localisation study has localised RXT…
gene_ID=unitig193_250	GT4	Amino_oxidase/DUF2458	Flavin containing amine oxidoreductase. This family consists of various amine oxidases, including maze polyamine oxidase (PAO) and various flavin containing monoamine oxidases (MAO). The aligned region includes the flavin binding site of these enzymes. The family also contains phytoene dehydrogenases and related enzymes. In vertebrates MAO plays an important role regulating the intracellular leve…
gene_ID=unitig193_252	GH72	Glyco_hydro_72	Glucanosyltransferase. This is a family of glycosylphosphatidylinositol-anchored beta(-13)glucanosyltransferases. The active site residues in the Aspergillus fumigatus example are the two glutamate residues at 160 and 261.
gene_ID=unitig193_257	GT50	Cyclin_N	Cyclin, N-terminal domain. Cyclins regulate cyclin dependent kinases (CDKs). Human cyclin-O is a Uracil-DNA glycosylase that is related to other cyclins. Cyclins contain two domains of similar all-alpha fold, of which this family corresponds with the N-terminal domain.
gene_ID=unitig193_265	AA10	Rad60-SLD	Ubiquitin-2 like Rad60 SUMO-like. The small ubiquitin-related modifier SUMO-1 is a Ub/Ubl family member, and although SUMO-1 shares structural similarity to Ub, SUMO's cellular functions remain distinct insomuch as SUMO modification alters protein function through changes in activity, cellular localisation, or by protecting substrates from ubiquitination. Rad60 family members contain functionally…
gene_ID=unitig193_271	CE9	Amidohydro_1	Amidohydrolase family. This family of enzymes are a a large metal dependent hydrolase superfamily. The family includes Adenine deaminase EC:3.5.4.2 that hydrolyses adenine to form hypoxanthine and ammonia. Adenine deaminases reaction is important for adenine utilisation as a purine and also as a nitrogen source. This family also includes dihydroorotase and N-acetylglucosamine-6-phosphate deacetyl…
gene_ID=unitig193_274	GH32	Ferric_reduct/FAD_binding_8/NAD_binding_6	Ferric reductase like transmembrane component. This family includes a common region in the transmembrane proteins mammalian cytochrome B-245 heavy chain (gp9-1phox), ferric reductase transmembrane component in yeast and respiratory burst oxidase from mouse-ear cress. This may be a family of flavocytochromes capable of moving electrons across the plasma membrane. The Frp1 protein from S. pombe is …	gene codes for the beta chain of cytochrome B-245 and cytochrome B-245 is missing from patients with the disease./FAD-binding domain. /Ferric reductase NAD binding domain.
gene_ID=unitig193_277	GH12	Peptidase_M16/Peptidase_M16_C	Insulinase (Peptidase family M16). /Peptidase M16 inactive domain. Peptidase M16 consists of two structurally related domains. One is the active peptidase, whereas the other is inactive. The two domains hold the substrate like a clamp.
gene_ID=unitig193_280	AA7	FAD_binding_4/ALO	FAD binding domain. This family consists of various enzymes that use FAD as a co-factor, most of the enzymes are similar to oxygen oxidoreductase. One of the enzymes Vanillyl-alcohol oxidase (VAO) has a solved structure, the alignment includes the FAD binding site, called the PP-loop, between residues 99-110. The FAD molecule is covalently bound in the known structure, however the residue that li…
gene_ID=unitig193_286	GT4	Amino_oxidase	Flavin containing amine oxidoreductase. This family consists of various amine oxidases, including maze polyamine oxidase (PAO) and various flavin containing monoamine oxidases (MAO). The aligned region includes the flavin binding site of these enzymes. The family also contains phytoene dehydrogenases and related enzymes. In vertebrates MAO plays an important role regulating the intracellular leve…
gene_ID=unitig193_298	GH18	Redoxin	Redoxin. This family of redoxins includes peroxiredoxin, thioredoxin and glutaredoxin proteins.
gene_ID=unitig193_311	GT50	Cyclin_N/Cyclin_C/MAM33	Cyclin, N-terminal domain. Cyclins regulate cyclin dependent kinases (CDKs). Human cyclin-O is a Uracil-DNA glycosylase that is related to other cyclins. Cyclins contain two domains of similar all-alpha fold, of which this family corresponds with the N-terminal domain./Cyclin, C-terminal domain. Cyclins regulate cyclin dependent kinases (CDKs). Human CCNO is a Uracil-DNA glycosylase that is relat…
gene_ID=unitig193_318	CE11	DEAD/Helicase_C	DEAD/DEAH box helicase. Members of this family include the DEAD and DEAH box helicases. Helicases are involved in unwinding nucleic acids. The DEAD box helicases are involved in various aspects of RNA metabolism, including nuclear transcription, pre mRNA splicing, ribosome bio_	genesis, nucleocytoplasmic transport, translation, RNA decay and organellar _	gene expression./Helicase conserved C-terminal domain. The Prosite family is restricted to DEAD/H helicases, whereas this domain family is found in a wide variety of helicases and helicase related proteins. It may be that this is not an autonomously folding unit, but an integral part of the helicase.
gene_ID=unitig193_319	GT1	FYVE	FYVE zinc finger. The FYVE zinc finger is named after four proteins that it has been found in: Fab1, YOTB/ZK632.12, Vac1, and EEA1. The FYVE finger has been shown to bind two Zn++ ions. The FYVE finger has eight potential zinc coordinating cysteine positions. Many members of this family also include two histidines in a motif R+HHC+XCG, where + represents a charged residue and X any residue. We ha…
gene_ID=unitig193_320	GT34	p450	Cytochrome P450. Cytochrome P450s are haem-thiolate proteins involved in the oxidative degradation of various compounds. They are particularly well known for their role in the degradation of environmental toxins and mutagens. They can be divided into 4 classes, according to the method by which electrons from NAD(P)H are delivered to the catalytic site. Sequence conservation is relatively low with…	general topography and structural fold are highly conserved. The conserved core is composed of a coil termed the 'meander', a four-helix bundle, helices J and K, and two sets of beta-sheets. These constitute the haem-binding loop (with an absolutely conserved cysteine that serves as the 5th ligand for the haem iron), the proton-transfer groove and the absolutely conserved EXXR motif in helix K. W…	general enzymatic function is to catalyze regiospecific and stereospecific oxidation of non-activated hydrocarbons at physiological temperatures.
gene_ID=unitig193_337	GT48	MFS_1	Major Facilitator Superfamily.
gene_ID=unitig193_342	GT4	Abhydrolase_6/Abhydrolase_1	Alpha/beta hydrolase family. This family contains alpha/beta hydrolase enzymes of diverse specificity./alpha/beta hydrolase fold. This catalytic domain is found in a very wide range of enzymes.
gene_ID=unitig193_350	GT2	Glyco_tranf_2_3/Glyco_transf_21	Glycosyltransferase like family 2. Members of this family of prokaryotic proteins include putative glucosyltransferase, which are involved in bacterial capsule biosynthesis./Glycosyl transferase family 21. This is a family of ceramide beta-glucosyltransferases - EC:2.4.1.80.
gene_ID=unitig193_363	CBM35	PBP	Phosphatidylethanolamine-binding protein.
gene_ID=unitig193_369	GT1	FYVE	FYVE zinc finger. The FYVE zinc finger is named after four proteins that it has been found in: Fab1, YOTB/ZK632.12, Vac1, and EEA1. The FYVE finger has been shown to bind two Zn++ ions. The FYVE finger has eight potential zinc coordinating cysteine positions. Many members of this family also include two histidines in a motif R+HHC+XCG, where + represents a charged residue and X any residue. We ha…
gene_ID=unitig193_370	GT48	Sugar_tr	Sugar (and other) transporter.
gene_ID=unitig195_6	GT34	p450	Cytochrome P450. Cytochrome P450s are haem-thiolate proteins involved in the oxidative degradation of various compounds. They are particularly well known for their role in the degradation of environmental toxins and mutagens. They can be divided into 4 classes, according to the method by which electrons from NAD(P)H are delivered to the catalytic site. Sequence conservation is relatively low with…	general topography and structural fold are highly conserved. The conserved core is composed of a coil termed the 'meander', a four-helix bundle, helices J and K, and two sets of beta-sheets. These constitute the haem-binding loop (with an absolutely conserved cysteine that serves as the 5th ligand for the haem iron), the proton-transfer groove and the absolutely conserved EXXR motif in helix K. W…	general enzymatic function is to catalyze regiospecific and stereospecific oxidation of non-activated hydrocarbons at physiological temperatures.
gene_ID=unitig195_17	GH72	MMR_HSR1/TGS	50S ribosome-binding GTPase. The full-length GTPase protein is required for the complete activity of the protein of interacting with the 50S ribosome and binding of both adenine and guanine nucleotides, with a preference for guanine nucleotide./TGS domain. The TGS domain is named after ThrRS, GTPase, and SpoT. Interestingly, TGS domain was detected also at the amino terminus of the uridine kinase…
gene_ID=unitig195_21	GT22	Glyco_transf_22	Alg9-like mannosyltransferase family. Members of this family are mannosyltransferase enzymes. At least some members are localised in endoplasmic reticulum and involved in GPI anchor biosynthesis.
gene_ID=unitig195_22	GT47	Adenylsucc_synt	Adenylosuccinate synthetase.
gene_ID=unitig195_34	CBM13	HSP70	Hsp70 protein. Hsp70 chaperones help to fold many proteins. Hsp70 assisted folding involves repeated cycles of substrate binding and release. Hsp70 activity is ATP dependent. Hsp70 proteins are made up of two regions: the amino terminus is the ATPase domain and the carboxyl terminus is the substrate binding region.
gene_ID=unitig195_47	GT48	MFS_1/Sugar_tr	Major Facilitator Superfamily. /Sugar (and other) transporter.
gene_ID=unitig195_50	GT62	Anp1	Anp1. The members of this family (Anp1, Van1 and Mnn9) are membrane proteins required for proper Golgi function. These proteins co-localise within the cis Golgi, and that they are physically associated in two distinct complexes.
gene_ID=unitig195_68	GT66	STT3	Oligosaccharyl transferase STT3 subunit. This family consists of the oligosaccharyl transferase STT3 subunit and related proteins. The STT3 subunit is part of the oligosaccharyl transferase (OTase) complex of proteins and is required for its activity. In eukaryotes, OTase transfers a lipid-linked core-oligosaccharide to selected asparagine residues in the ER. In the archaea STT3 occurs alone, rat…
gene_ID=unitig195_76	GT2	Chitin_synth_2/Glyco_trans_2_3	Chitin synthase. Members of this family are fungal chitin synthase EC:2.4.1.16 enzymes. They catalyze chitin synthesis as follows: UDP-N-acetyl-D-glucosamine + {(1,4)-(N-acetyl-beta-D-glucosaminyl)}(N) <=> UDP + {(1,4)-(N-acetyl-beta-D-glucosaminyl)}(N+1)./Glycosyl transferase family group 2. Members of this family of prokaryotic proteins include putative glucosyltransferases, which are involved …
gene_ID=unitig195_81	GT2	tRNA-synt_1e/tRNA-synt_1e	tRNA synthetases class I (C) catalytic domain. This family includes only cysteinyl tRNA synthetases./tRNA synthetases class I (C) catalytic domain. This family includes only cysteinyl tRNA synthetases.
gene_ID=unitig195_85	GT48	Sugar_tr	Sugar (and other) transporter.
gene_ID=unitig196_16	GT48/GT66	Pro_isomerase/MFS_1	Cyclophilin type peptidyl-prolyl cis-trans isomerase/CLD. The peptidyl-prolyl cis-trans isomerases, also known as cyclophilins, share this domain of about 109 amino acids. Cyclophilins have been found in all organisms studied so far and catalyze peptidyl-prolyl isomerisation during which the peptide bond preceding proline (the peptidyl-prolyl bond) is stabilised in the cis conformation. Mammalian…
gene_ID=unitig196_18	GT48	MFS_1	Major Facilitator Superfamily.
gene_ID=unitig196_25	GH103	Epimerase/Epimerase_Csub/Aldose_epim	NAD dependent epimerase/dehydratase family. This family of proteins utilise NAD as a cofactor. The proteins in this family use nucleotide-sugar substrates for a variety of chemical reactions./UDP-glucose 4-epimerase C-term subunit. This domain is the very C-terminal subunit of UDP-glucose 4-epimerase./Aldose -1epimerase.
gene_ID=unitig196_27	GT48	Sugar_tr/MFS_1	Sugar (and other) transporter. /Major Facilitator Superfamily.
gene_ID=unitig196_30	GT20	PA14_2	GLEYA domain. This presumed domain is found in fungal adhesins and is related to the PA14 domain.
gene_ID=unitig196_51	GT1	Anillin/PH	Cell division protein anillin. Anillin is a protein involved in septin organisation during cell division. It is an actin binding protein that is localised to the cleavage furrow, and it maintains the localisation of active myosin, which ensures the spatial control of concerted contraction during cytokinesis./PH domain. PH stands for pleckstrin homology.
gene_ID=unitig196_59	GH65	Hydrolase/HAD_2	haloacid dehalogenase-like hydrolase. This family is structurally different from the alpha/beta hydrolase family (pfam00561). This family includes L-2-haloacid dehalogenase, epoxide hydrolases and phosphatases. The structure of the family consists of two domains. One is an inserted four helix bundle, which is the least well conserved region of the alignment, between residues 16 and 96 of Pseudomo…
gene_ID=unitig196_61	GT2	His_Phos_1/Nsp1_C	Histidine phosphatase superfamily (branch 1). The histidine phosphatase superfamily is so named because catalysis centres on a conserved His residue that is transiently phosphorylated during the catalytic cycle. Other conserved residues contribute to a 'phosphate pocket' and interact with the phospho group of substrate before, during and after its transfer to the His residue. Structure and sequen…
gene_ID=unitig196_74	AA6/GH130	Flavodoxin_1/FAD_binding_1/NAD_binding_1/tRNA-synt_2d/FDX-ACB	Flavodoxin. /FAD binding domain. This domain is found in sulfite reductase, NADPH cytochrome P450 reductase, Nitric oxide synthase and methionine synthase reductase./Oxidoreductase NAD-binding domain. Xanthine dehydrogenases, that also bind FAD/NAD, have essentially no similarity./tRNA synthetases class II core domain (F). Other tRNA synthetase sub-families are too dissimilar to be included. This…
gene_ID=unitig196_76	GH72	TrmE_N/MMR_HSR1/GTPase_Cys_C	GTP-binding protein TrmE N-terminus. This family represents the shorter, B, chain of the homo-dimeric structure which is a guanine nucleotide-binding protein that binds and hydrolyses GTP. TrmE is homologous to the tetrahydrofolate-binding domain of N,N-dimethylglycine oxidase and indeed binds formyl-tetrahydrofolate. TrmE actively participates in the formylation reaction of uridine and regulates…
gene_ID=unitig196_106	GH109	GFO_IDH_MocA/tRNA_bind	Oxidoreductase family, NAD-binding Rossmann fold. This family of enzymes utilise NADP or NAD. This family is called the GFO/IDH/MOCA family in swiss-prot./Putative tRNA binding domain. This domain is found in prokaryotic methionyl-tRNA synthetases, prokaryotic phenylalanyl tRNA synthetases the yeast GU4 nucleic-binding protein (G4p1 or p42, ARC1), human tyrosyl-tRNA synthetase, and endothelial-mo…
gene_ID=unitig196_110	GT48	Sugar_tr	Sugar (and other) transporter.
gene_ID=unitig196_126	CBM51	LIP	Secretory lipase. These lipases are expressed and secreted during the infection cycle of these pathogens. In particular, C. albicans has a large number of different lipases, possibly reflecting broad lipolytic activity, which may contribute to the persistence and virulence of C. albicans in human tissue.
gene_ID=unitig196_137	GT4	Methyltransf_25/Methyltransf_31/Methyltransf_11/Methyltransf_12	Methyltransferase domain. This family appears to be a methyltransferase domain./Methyltransferase domain. This family appears to be have methyltransferase activity./Methyltransferase domain. Members of this family are SAM dependent methyltransferases./Methyltransferase domain. Members of this family are SAM dependent methyltransferases.
gene_ID=unitig196_141	GT22	DUF3445	Protein of unknown function (DUF3445). This family of proteins are functionally uncharacterized. This protein is found in bacteria and eukaryotes. Proteins in this family are typically between 264 to 418 amino acids in length. This protein has a conserved RLP sequence motif. This protein has two completely conserved R residues that may be functionally important.
gene_ID=unitig196_148	CE1	Prenyltrans_2	Prenyltransferase-like.
gene_ID=unitig196_157	CBM13	HSP70/MreB_Mbl	Hsp70 protein. Hsp70 chaperones help to fold many proteins. Hsp70 assisted folding involves repeated cycles of substrate binding and release. Hsp70 activity is ATP dependent. Hsp70 proteins are made up of two regions: the amino terminus is the ATPase domain and the carboxyl terminus is the substrate binding region./MreB/Mbl protein. This family consists of bacterial MreB and Mbl proteins as well …
gene_ID=unitig196_166	GH132	C1_1/C1_1	Phorbol esters/diacylglycerol binding domain (C1 domain). This domain is also known as the Protein kinase C conserved region 1 (C1) domain./Phorbol esters/diacylglycerol binding domain (C1 domain). This domain is also known as the Protein kinase C conserved region 1 (C1) domain.
gene_ID=unitig196_189	GH47	Glyco_hydro_47	Glycosyl hydrolase family 47. Members of this family are alpha-mannosidases that catalyze the hydrolysis of the terminal 1,2-linked alpha-D-mannose residues in the oligo-mannose oligosaccharide Man(9)(GlcNAc)(2).
gene_ID=unitig196_197	GT60	2OG-FeII_Oxy_3/Ofd1_CTDD	2OG-Fe(II) oxygenase superfamily. This family contains members of the 2-oxoglutarate (2OG) and Fe(II)-dependent oxygenase superfamily./Oxoglutarate and iron-dependent oxygenase degradation C-term. Ofd1 is a prolyl 4-hydroxylase-like 2-oxoglutarate-Fe(II) dioxygenase that accelerates the degradation of Sre1N in the presence of oxygen. The domain is conserved from yeasts to humans. Yeast Sre1 is th…
gene_ID=unitig196_198	GH130	FAD_binding_6/NAD_binding_1/DUF946	Oxidoreductase FAD-binding domain. /Oxidoreductase NAD-binding domain. Xanthine dehydrogenases, that also bind FAD/NAD, have essentially no similarity./Plant protein of unknown function (DUF946). This family consists of several hypothetical proteins from Arabidopsis thaliana and Oryza sativa. The function of this family is unknown.
gene_ID=unitig196_199	GT48	AA_permease/AA_permease_2	Amino acid permease. /Amino acid permease.
gene_ID=unitig196_227	GH65	Hydrolase	haloacid dehalogenase-like hydrolase. This family is structurally different from the alpha/beta hydrolase family (pfam00561). This family includes L-2-haloacid dehalogenase, epoxide hydrolases and phosphatases. The structure of the family consists of two domains. One is an inserted four helix bundle, which is the least well conserved region of the alignment, between residues 16 and 96 of Pseudomo…
gene_ID=unitig196_233	GT71	Mannosyl_trans3	Mannosyltransferase putative. This family is conserved in fungi. Several members are annotated as being alpha-1,3-mannosyltransferase but this could not be confirmed.
gene_ID=unitig196_235	CE11	DEAD	DEAD/DEAH box helicase. Members of this family include the DEAD and DEAH box helicases. Helicases are involved in unwinding nucleic acids. The DEAD box helicases are involved in various aspects of RNA metabolism, including nuclear transcription, pre mRNA splicing, ribosome bio_	genesis, nucleocytoplasmic transport, translation, RNA decay and organellar _	gene expression.
gene_ID=unitig196_239	CE1	Thi4/Lactamase_B/Lactamase_B_2/Beta-Casp/CPSF73-100_C	Thi4 family. This family includes a putative thiamine biosynthetic enzyme./Metallo-beta-lactamase superfamily. /Beta-lactamase superfamily domain. This family is part of the beta-lactamase superfamily and is related to pfam00753./Beta-Casp domain. The beta-CASP domain is found C terminal to the beta-lactamase domain in pre-mRNA 3'-end-processing endonuclease. The active site of this enzyme is loc…
gene_ID=unitig196_253	CE11	SNF2_N/Helicase_C/Bromodomain	SNF2 family N-terminal domain. This domain is found in proteins involved in a variety of processes including transcription regulation (e.g., SNF2, STH1, brahma, MOT1), DNA repair (e.g. ERCC6, RAD16, RAD5), DNA recombination (e.g. RAD54), and chromatin unwinding (e.g. ISWI) as well as a variety of other proteins with little functional information (e.g. lodestar, ETL1)./Helicase conserved C-termina…
gene_ID=unitig196_264	GT34	p450	Cytochrome P450. Cytochrome P450s are haem-thiolate proteins involved in the oxidative degradation of various compounds. They are particularly well known for their role in the degradation of environmental toxins and mutagens. They can be divided into 4 classes, according to the method by which electrons from NAD(P)H are delivered to the catalytic site. Sequence conservation is relatively low with…	general topography and structural fold are highly conserved. The conserved core is composed of a coil termed the 'meander', a four-helix bundle, helices J and K, and two sets of beta-sheets. These constitute the haem-binding loop (with an absolutely conserved cysteine that serves as the 5th ligand for the haem iron), the proton-transfer groove and the absolutely conserved EXXR motif in helix K. W…	general enzymatic function is to catalyze regiospecific and stereospecific oxidation of non-activated hydrocarbons at physiological temperatures.
gene_ID=unitig196_286	GT55	CorA/CorA	CorA-like Mg2+ transporter protein. The CorA transport system is the primary Mg2+ influx system of Salmonella typhimurium and Escherichia coli. CorA is virtually ubiquitous in the Bacteria and Archaea. There are also eukaryotic relatives of this protein. The family includes the MRS2 protein from yeast that is thought to be an RNA splicing protein. However its membership of this family suggests th…
gene_ID=unitig196_292	GH72	Glyco_hydro_72	Glucanosyltransferase. This is a family of glycosylphosphatidylinositol-anchored beta(-13)glucanosyltransferases. The active site residues in the Aspergillus fumigatus example are the two glutamate residues at 160 and 261.
gene_ID=unitig196_293	GH72	Glyco_hydro_72	Glucanosyltransferase. This is a family of glycosylphosphatidylinositol-anchored beta(-13)glucanosyltransferases. The active site residues in the Aspergillus fumigatus example are the two glutamate residues at 160 and 261.
gene_ID=unitig196_298	CE11	DEAD/Helicase_C	DEAD/DEAH box helicase. Members of this family include the DEAD and DEAH box helicases. Helicases are involved in unwinding nucleic acids. The DEAD box helicases are involved in various aspects of RNA metabolism, including nuclear transcription, pre mRNA splicing, ribosome bio_	genesis, nucleocytoplasmic transport, translation, RNA decay and organellar _	gene expression./Helicase conserved C-terminal domain. The Prosite family is restricted to DEAD/H helicases, whereas this domain family is found in a wide variety of helicases and helicase related proteins. It may be that this is not an autonomously folding unit, but an integral part of the helicase.
gene_ID=unitig201_12	CBM48/GH13	CBM_48/Alpha-amylase/Alpha-amylase_C	Carbohydrate-binding module 48 (Isoamylase N-terminal domain). This domain is found in a range of enzymes that act on branched substrates - isoamylase, pullulanase and branching enzyme. This family also contains the beta subunit of 5' AMP activated kinase./Alpha amylase, catalytic domain. Alpha amylase is classified as family 13 of the glycosyl hydrolases. The structure is an 8 stranded alpha/bet…
gene_ID=unitig201_15	GH72	MMR_HSR1	50S ribosome-binding GTPase. The full-length GTPase protein is required for the complete activity of the protein of interacting with the 50S ribosome and binding of both adenine and guanine nucleotides, with a preference for guanine nucleotide.
gene_ID=unitig201_25	GT48	MFS_1/PrmA/Methyltransf_31/Methyltransf_18	Major Facilitator Superfamily. /Ribosomal protein L11 methyltransferase (PrmA). This family consists of several Ribosomal protein L11 methyltransferase (EC:2.1.1.-) sequences./Methyltransferase domain. This family appears to be have methyltransferase activity./Methyltransferase domain. Protein in this family function as methyltransferases.
gene_ID=unitig201_32	GT48	AA_permease/AA_permease_2/AA_permease/AA_permease_2/AA_permease/AA_permease_2	Amino acid permease. /Amino acid permease. /Amino acid permease. /Amino acid permease. /Amino acid permease. /Amino acid permease.
gene_ID=unitig201_33	GT48	AA_permease/AA_permease_2	Amino acid permease. /Amino acid permease.
gene_ID=unitig201_51	GH18	tRNA-synt_1/tRNA-synt_1g/tRNA-synt_1_2/Anticodon_1	tRNA synthetases class I (I, L, M and V). Other tRNA synthetase sub-families are too dissimilar to be included./tRNA synthetases class I (M). This family includes methionyl tRNA synthetases./Leucyl-tRNA synthetase, Domain 2. This is a family of the conserved region of Leucine-tRNA ligase or Leucyl-tRNA synthetase, EC:6.1.1.4./Anticodon-binding domain of tRNA. This domain is found mainly hydrophob…
gene_ID=unitig201_55	GH92	adh_short_C2/adh_short	Enoyl-(Acyl carrier protein) reductase. /short chain dehydrogenase. This family contains a wide variety of dehydrogenases.
gene_ID=unitig201_57	GT48	AA_permease/AA_permease_2	Amino acid permease. /Amino acid permease.
gene_ID=unitig201_58	CE11	SNF2_N/Helicase_C	SNF2 family N-terminal domain. This domain is found in proteins involved in a variety of processes including transcription regulation (e.g., SNF2, STH1, brahma, MOT1), DNA repair (e.g. ERCC6, RAD16, RAD5), DNA recombination (e.g. RAD54), and chromatin unwinding (e.g. ISWI) as well as a variety of other proteins with little functional information (e.g. lodestar, ETL1)./Helicase conserved C-termina…
gene_ID=unitig201_62	GT55	CorA	CorA-like Mg2+ transporter protein. The CorA transport system is the primary Mg2+ influx system of Salmonella typhimurium and Escherichia coli. CorA is virtually ubiquitous in the Bacteria and Archaea. There are also eukaryotic relatives of this protein. The family includes the MRS2 protein from yeast that is thought to be an RNA splicing protein. However its membership of this family suggests th…
gene_ID=unitig201_64	GH132	FCH	Fes/CIP4, and EFC/F-BAR homology domain. Alignment extended from. Highly alpha-helical. The cytosolic endocytic adaptor proteins in fungi carry this domain at the N-terminus; several of these have been referred to as muniscin proteins. These N-terminal BAR, N-BAR, and EFC/F-BAR domains are found in proteins that regulate membrane trafficking events by inducing membrane tubulation. The domain dime…
gene_ID=unitig201_83	GH28	Zn_clus	Fungal Zn(2)-Cys(6) binuclear cluster domain.
gene_ID=unitig201_86	GT2	Chitin_synth_1N/Chitin_synth_1/Chitin_synth_2/Glyco_trans_2_3	Chitin synthase N-terminal. This is the N-terminal domain of Chitin synthase (pfam01644)./Chitin synthase. This region is found commonly in chitin synthases classes I, II and III. Chitin a linear homopolymer of GlcNAc residues, it is an important component of the cell wall of fungi and is synthesised on the cytoplasmic surface of the cell membrane by membrane bound chitin synthases./Chitin syntha…
gene_ID=unitig211_2	CE11	DEAD/Helicase_C	DEAD/DEAH box helicase. Members of this family include the DEAD and DEAH box helicases. Helicases are involved in unwinding nucleic acids. The DEAD box helicases are involved in various aspects of RNA metabolism, including nuclear transcription, pre mRNA splicing, ribosome bio_	genesis, nucleocytoplasmic transport, translation, RNA decay and organellar _	gene expression./Helicase conserved C-terminal domain. The Prosite family is restricted to DEAD/H helicases, whereas this domain family is found in a wide variety of helicases and helicase related proteins. It may be that this is not an autonomously folding unit, but an integral part of the helicase.
gene_ID=unitig211_7	GH72	Glyco_hydro_72	Glucanosyltransferase. This is a family of glycosylphosphatidylinositol-anchored beta(-13)glucanosyltransferases. The active site residues in the Aspergillus fumigatus example are the two glutamate residues at 160 and 261.
gene_ID=unitig211_8	GH72	Glyco_hydro_72	Glucanosyltransferase. This is a family of glycosylphosphatidylinositol-anchored beta(-13)glucanosyltransferases. The active site residues in the Aspergillus fumigatus example are the two glutamate residues at 160 and 261.
gene_ID=unitig212_8	GH84	Peptidase_M24	Metallopeptidase family M24. This family contains metallopeptidases. It also contains non-peptidase homologues such as the N terminal domain of Spt16 which is a histone H3-H4 binding module.
gene_ID=unitig212_16	GT71	Mannosyl_trans3	Mannosyltransferase putative. This family is conserved in fungi. Several members are annotated as being alpha-1,3-mannosyltransferase but this could not be confirmed.
gene_ID=unitig212_19	GT4	Abhydrolase_5/Abhydrolase_6/Abhydrolase_1	Alpha/beta hydrolase family. This family contains a diverse range of alpha/beta hydrolase enzymes./Alpha/beta hydrolase family. This family contains alpha/beta hydrolase enzymes of diverse specificity./alpha/beta hydrolase fold. This catalytic domain is found in a very wide range of enzymes.
gene_ID=unitig212_26	CE1	Abhydrolase_2/Dopey_N	Phospholipase/Carboxylesterase. This family consists of both phospholipases and carboxylesterases with broad substrate specificity, and is structurally related to alpha/beta hydrolases pfam00561./Dopey, N-terminal. DopA is the founding member of the Dopey family and is required for correct cell morphology and spatiotemporal organisation of multicellular structures in the filamentous fungus Asperg…	genesis.
gene_ID=unitig212_29	GT28	Glyco_tran_28_C/TFIID-18kDa	Glycosyltransferase family 28 C-terminal domain. The glycosyltransferase family 28 includes monogalactosyldiacylglycerol synthase (EC 2.4.1.46) and UDP-N-acetylglucosamine transferase (EC 2.4.1.-). Structural analysis suggests the C-terminal domain contains the UDP-GlcNAc binding site./Transcription initiation factor IID, 18kD subunit. This family includes the Spt3 yeast transcription factors and…
gene_ID=unitig212_30	GT39	PMT/MIR/RINGv	Dolichyl-phosphate-mannose-protein mannosyltransferase. This is a family of Dolichyl-phosphate-mannose-protein mannosyltransferase proteins EC:2.4.1.109. These proteins are responsible for O-linked glycosylation of proteins, they catalyze the reaction:- Dolichyl phosphate D-mannose + protein <=> dolichyl phosphate + O-D-mannosyl-protein. Also in this family is the Drosophila rotated abdomen prote…
gene_ID=unitig212_32	GH2	Trp_syntA/PALP	Tryptophan synthase alpha chain. /Pyridoxal-phosphate dependent enzyme. Members of this family are all pyridoxal-phosphate dependent enzymes. This family includes: serine dehydratase EC:4.2.1.13 P20132, threonine dehydratase EC:4.2.1.16, tryptophan synthase beta chain EC:4.2.1.20, threonine synthase EC:4.2.99.2, cysteine synthase EC:4.2.99.8 P11096, cystathionine beta-synthase EC:4.2.1.22, -1amin…
gene_ID=unitig212_45	CBM13	HSP70/MreB_Mbl	Hsp70 protein. Hsp70 chaperones help to fold many proteins. Hsp70 assisted folding involves repeated cycles of substrate binding and release. Hsp70 activity is ATP dependent. Hsp70 proteins are made up of two regions: the amino terminus is the ATPase domain and the carboxyl terminus is the substrate binding region./MreB/Mbl protein. This family consists of bacterial MreB and Mbl proteins as well …
gene_ID=unitig212_46	GT76	DUF3448/AMP-binding/DUF4009/Mannosyl_trans2	Domain of unknown function (DUF3448). This presumed domain is functionally uncharacterized. This domain is found in bacteria, archaea and eukaryotes. This domain is about 80 amino acids in length. This domain is found associated with pfam00501. This domain has a conserved DRH sequence motif. This domain has two completely conserved residues (N and A) that may be functionally important./AMP-bindin…
gene_ID=unitig212_47	GT22	DUF3445	Protein of unknown function (DUF3445). This family of proteins are functionally uncharacterized. This protein is found in bacteria and eukaryotes. Proteins in this family are typically between 264 to 418 amino acids in length. This protein has a conserved RLP sequence motif. This protein has two completely conserved R residues that may be functionally important.
gene_ID=unitig212_51	GT2	His_Phos_1	Histidine phosphatase superfamily (branch 1). The histidine phosphatase superfamily is so named because catalysis centres on a conserved His residue that is transiently phosphorylated during the catalytic cycle. Other conserved residues contribute to a 'phosphate pocket' and interact with the phospho group of substrate before, during and after its transfer to the His residue. Structure and sequen…
gene_ID=unitig212_82	GT2	Aminotran_3	Aminotransferase class-III.
gene_ID=unitig212_86	GT48	MFS_1	Major Facilitator Superfamily.
gene_ID=unitig212_90	GT15	Sds3	Sds3-like. Repression of _	gene transcription is mediated by histone deacetylases containing repressor-co-repressor complexes, which are recruited to promoters of target _	genes via interactions with sequence-specific transcription factors. The co-repressor complex contains a core of at least seven proteins. This family represents the conserved region found in Sds3, Dep1 and BRMS-1homologue p40 proteins.
gene_ID=unitig212_110	CE11	SNF2_N/Helicase_C	SNF2 family N-terminal domain. This domain is found in proteins involved in a variety of processes including transcription regulation (e.g., SNF2, STH1, brahma, MOT1), DNA repair (e.g. ERCC6, RAD16, RAD5), DNA recombination (e.g. RAD54), and chromatin unwinding (e.g. ISWI) as well as a variety of other proteins with little functional information (e.g. lodestar, ETL1)./Helicase conserved C-termina…
gene_ID=unitig212_119	GT90	A_deamin	Adenosine-deaminase (editase) domain. Adenosine deaminases acting on RNA (ADARs) can deaminate adenosine to form inosine. In long double-stranded RNA, this process is non-specific; it occurs site-specifically in RNA transcripts. The former is important in defence against viruses, whereas the latter may affect splicing or untranslated regions. They are primarily nuclear proteins, but a longer isof…
gene_ID=unitig212_121	GT57	Alg6_Alg8	ALG6, ALG8 glycosyltransferase family. N-linked (asparagine-linked) glycosylation of proteins is mediated by a highly conserved pathway in eukaryotes, in which a lipid (dolichol phosphate)-linked oligosaccharide is assembled at the endoplasmic reticulum membrane prior to the transfer of the oligosaccharide moiety to the target asparagine residues. This oligosaccharide is composed of Glc(3)Man(9)G…	gene, a C->T transition, which causes Ala333 to be replaced with Val, has been identified as the cause of a congenital disorder of glycosylation, designated as type Ic OMIM:603147.
gene_ID=unitig212_126	CE11	DEAD/Helicase_C	DEAD/DEAH box helicase. Members of this family include the DEAD and DEAH box helicases. Helicases are involved in unwinding nucleic acids. The DEAD box helicases are involved in various aspects of RNA metabolism, including nuclear transcription, pre mRNA splicing, ribosome bio_	genesis, nucleocytoplasmic transport, translation, RNA decay and organellar _	gene expression./Helicase conserved C-terminal domain. The Prosite family is restricted to DEAD/H helicases, whereas this domain family is found in a wide variety of helicases and helicase related proteins. It may be that this is not an autonomously folding unit, but an integral part of the helicase.
gene_ID=unitig212_129	GH72	GN3L_Grn1/MMR_HSR1	GNL3L/Grn1 putative GTPase. Grn1 (yeast) and GNL3L (human) are putative GTPases which are required for growth and play a role in processing of nucleolar pre-rRNA. This family contains a potential nuclear localisation signal./50S ribosome-binding GTPase. The full-length GTPase protein is required for the complete activity of the protein of interacting with the 50S ribosome and binding of both aden…
gene_ID=unitig212_140	GH72/CBM43	Glyco_hydro_72/X8	Glucanosyltransferase. This is a family of glycosylphosphatidylinositol-anchored beta(-13)glucanosyltransferases. The active site residues in the Aspergillus fumigatus example are the two glutamate residues at 160 and 261./X8 domain. The X8 domain domain contains at least 6 conserved cysteine residues that presumably form three disulphide bridges. The domain is found in an Olive pollen allergen a…
gene_ID=unitig212_149	CBM51	LIP	Secretory lipase. These lipases are expressed and secreted during the infection cycle of these pathogens. In particular, C. albicans has a large number of different lipases, possibly reflecting broad lipolytic activity, which may contribute to the persistence and virulence of C. albicans in human tissue.
gene_ID=unitig212_153	GH72	NGP1NT/MMR_HSR1	NGP1NT (NUC091) domain. This N terminal domain is found in a subfamily of hypothetical nucleolar GTP-binding proteins similar to human NGP1./50S ribosome-binding GTPase. The full-length GTPase protein is required for the complete activity of the protein of interacting with the 50S ribosome and binding of both adenine and guanine nucleotides, with a preference for guanine nucleotide.
gene_ID=unitig212_158	GH38	rve	Integrase core domain. Integrase mediates integration of a DNA copy of the viral genome into the host chromosome. Integrase is composed of three domains. The amino-terminal domain is a zinc binding domain pfam02022. This domain is the central catalytic domain. The carboxyl terminal domain that is a non-specific DNA binding domain pfam00552. The catalytic domain acts as an endonuclease when two nu…
gene_ID=unitig212_160	GT48	HlyIII/Sugar_tr/MFS_1	Haemolysin-III related. Members of this family are integral membrane proteins. This family includes a protein with hemolytic activity from Bacillus cereus. It has been proposed that YOL002c encodes a Saccharomyces cerevisiae protein that plays a key role in metabolic pathways that regulate lipid and phosphate metabolism. In eukaryotes, members are seven-transmembrane pass molecules found to encod…
gene_ID=unitig212_161	GH28	Zn_clus	Fungal Zn(2)-Cys(6) binuclear cluster domain.
gene_ID=unitig212_178	GT48	MFS_1	Major Facilitator Superfamily.
gene_ID=unitig212_184	GT91	DUF3589/DUF3589	Protein of unknown function (DUF3589). This family of proteins is found in eukaryotes. Proteins in this family are typically between 541 and 717 amino acids in length. The function of this family is not known,/Protein of unknown function (DUF3589). This family of proteins is found in eukaryotes. Proteins in this family are typically between 541 and 717 amino acids in length. The function of this …
gene_ID=unitig212_185	GT2	HATPase_c/HSP90	Histidine kinase-, DNA gyrase B-, and HSP90-like ATPase. This family represents the structurally related ATPase domains of histidine kinase, DNA gyrase B and HSP90./Hsp90 protein.
gene_ID=unitig212_187	GT55	Ank_2/Ank_4/Ank_2	Ankyrin repeats (3 copies). /Ankyrin repeats (many copies). /Ankyrin repeats (3 copies).
gene_ID=unitig212_198	GT48	MFS_1	Major Facilitator Superfamily.
gene_ID=unitig212_201	GT48	MFS_1	Major Facilitator Superfamily.
gene_ID=unitig212_207	GH32	Ferric_reduct/FAD_binding_8/NAD_binding_6	Ferric reductase like transmembrane component. This family includes a common region in the transmembrane proteins mammalian cytochrome B-245 heavy chain (gp9-1phox), ferric reductase transmembrane component in yeast and respiratory burst oxidase from mouse-ear cress. This may be a family of flavocytochromes capable of moving electrons across the plasma membrane. The Frp1 protein from S. pombe is …	gene codes for the beta chain of cytochrome B-245 and cytochrome B-245 is missing from patients with the disease./FAD-binding domain. /Ferric reductase NAD binding domain.
gene_ID=unitig212_220	GT50	Cyclin_N	Cyclin, N-terminal domain. Cyclins regulate cyclin dependent kinases (CDKs). Human cyclin-O is a Uracil-DNA glycosylase that is related to other cyclins. Cyclins contain two domains of similar all-alpha fold, of which this family corresponds with the N-terminal domain.
gene_ID=unitig212_223	GT1	VHS/FYVE	VHS domain. Domain present in VPS-27, Hrs and STAM./FYVE zinc finger. The FYVE zinc finger is named after four proteins that it has been found in: Fab1, YOTB/ZK632.12, Vac1, and EEA1. The FYVE finger has been shown to bind two Zn++ ions. The FYVE finger has eight potential zinc coordinating cysteine positions. Many members of this family also include two histidines in a motif R+HHC+XCG, where + r…
gene_ID=unitig212_235	CBM13	PI-PLC-X	Phosphatidylinositol-specific phospholipase C, X domain. This associates with pfam00387 to form a single structural unit.
gene_ID=unitig212_236	GT48	Sugar_tr	Sugar (and other) transporter.
gene_ID=unitig212_280	GT48	Sugar_tr	Sugar (and other) transporter.
gene_ID=unitig212_283	GT2	Myosin_head/Myosin_head	Myosin head (motor domain). /Myosin head (motor domain).
gene_ID=unitig212_284	GT50	Cyclin_N	Cyclin, N-terminal domain. Cyclins regulate cyclin dependent kinases (CDKs). Human cyclin-O is a Uracil-DNA glycosylase that is related to other cyclins. Cyclins contain two domains of similar all-alpha fold, of which this family corresponds with the N-terminal domain.
gene_ID=unitig212_292	GH12	Peptidase_M16/Peptidase_M16_C	Insulinase (Peptidase family M16). /Peptidase M16 inactive domain. Peptidase M16 consists of two structurally related domains. One is the active peptidase, whereas the other is inactive. The two domains hold the substrate like a clamp.
gene_ID=unitig212_294	GT34	p450/GHMP_kinases_N	Cytochrome P450. Cytochrome P450s are haem-thiolate proteins involved in the oxidative degradation of various compounds. They are particularly well known for their role in the degradation of environmental toxins and mutagens. They can be divided into 4 classes, according to the method by which electrons from NAD(P)H are delivered to the catalytic site. Sequence conservation is relatively low with…	general topography and structural fold are highly conserved. The conserved core is composed of a coil termed the 'meander', a four-helix bundle, helices J and K, and two sets of beta-sheets. These constitute the haem-binding loop (with an absolutely conserved cysteine that serves as the 5th ligand for the haem iron), the proton-transfer groove and the absolutely conserved EXXR motif in helix K. W…	general enzymatic function is to catalyze regiospecific and stereospecific oxidation of non-activated hydrocarbons at physiological temperatures./GHMP kinases N terminal domain. This family includes homoserine kinases, galactokinases and mevalonate kinases.
gene_ID=unitig212_317	GT87	NUDIX/Radical_SAM	NUDIX domain. /Radical SAM superfamily. Radical SAM proteins catalyze diverse reactions, including unusual methylations, isomerisation, sulphur insertion, ring formation, anaerobic oxidation and protein radical formation.
gene_ID=unitig212_320	GH17	Glyco_hydro_17	Glycosyl hydrolases family 17.
gene_ID=unitig212_321	GH65	Glyco_hydro_65N/Glyco_hydro_65m	Glycosyl hydrolase family 65, N-terminal domain. This family of glycosyl hydrolases contains vacuolar acid trehalase and maltose phosphorylase.Maltose phosphorylase (MP) is a dimeric enzyme that catalyzes the conversion of maltose and inorganic phosphate into beta-D-glucose--1phosphate and glucose. This domain is believed to be essential for catalytic activity although its precise function remain…
gene_ID=unitig212_323	GT22	DUF3445	Protein of unknown function (DUF3445). This family of proteins are functionally uncharacterized. This protein is found in bacteria and eukaryotes. Proteins in this family are typically between 264 to 418 amino acids in length. This protein has a conserved RLP sequence motif. This protein has two completely conserved R residues that may be functionally important.
gene_ID=unitig212_358	CBM48	DnaJ	DnaJ domain. DnaJ domains (J-domains) are associated with hsp70 heat-shock system and it is thought that this domain mediates the interaction. DnaJ-domain is therefore part of a chaperone (protein folding) system. The T-antigens, although not in Prosite are confirmed as DnaJ containing domains from literature.
gene_ID=unitig212_364	GH65	Cation_ATPase_N/E-1E2_ATPase/Hydrolase_like2/Hydrolase	Cation transporter/ATPase, N-terminus. Members of this families are involved in Na+/K+, H+/K+, Ca++ and Mg++ transport./E-1E2 ATPase. /Putative hydrolase of sodium-potassium ATPase alpha subunit. This is a putative hydrolase of the sodium-potassium ATPase alpha subunit./haloacid dehalogenase-like hydrolase. This family is structurally different from the alpha/beta hydrolase family (pfam00561). Th…
gene_ID=unitig212_366	GT2	His_Phos_1	Histidine phosphatase superfamily (branch 1). The histidine phosphatase superfamily is so named because catalysis centres on a conserved His residue that is transiently phosphorylated during the catalytic cycle. Other conserved residues contribute to a 'phosphate pocket' and interact with the phospho group of substrate before, during and after its transfer to the His residue. Structure and sequen…
gene_ID=unitig212_367	GT41	Acetyltransf_1	Acetyltransferase (GNAT) family. This family contains proteins with N-acetyltransferase functions such as Elp3-related proteins.
gene_ID=unitig212_369	GT48	Sugar_tr/MFS_1	Sugar (and other) transporter. /Major Facilitator Superfamily.
gene_ID=unitig212_370	GT51	FHA	FHA domain. The FHA (Forkhead-associated) domain is a phosphopeptide binding motif.
gene_ID=unitig212_386	CBM48	DnaJ	DnaJ domain. DnaJ domains (J-domains) are associated with hsp70 heat-shock system and it is thought that this domain mediates the interaction. DnaJ-domain is therefore part of a chaperone (protein folding) system. The T-antigens, although not in Prosite are confirmed as DnaJ containing domains from literature.
gene_ID=unitig212_404	CE11	DEAD/Helicase_C	DEAD/DEAH box helicase. Members of this family include the DEAD and DEAH box helicases. Helicases are involved in unwinding nucleic acids. The DEAD box helicases are involved in various aspects of RNA metabolism, including nuclear transcription, pre mRNA splicing, ribosome bio_	genesis, nucleocytoplasmic transport, translation, RNA decay and organellar _	gene expression./Helicase conserved C-terminal domain. The Prosite family is restricted to DEAD/H helicases, whereas this domain family is found in a wide variety of helicases and helicase related proteins. It may be that this is not an autonomously folding unit, but an integral part of the helicase.
gene_ID=unitig212_409	GT2	Aminotran_3	Aminotransferase class-III.
gene_ID=unitig212_426	CE11	SNF2_N/Helicase_C	SNF2 family N-terminal domain. This domain is found in proteins involved in a variety of processes including transcription regulation (e.g., SNF2, STH1, brahma, MOT1), DNA repair (e.g. ERCC6, RAD16, RAD5), DNA recombination (e.g. RAD54), and chromatin unwinding (e.g. ISWI) as well as a variety of other proteins with little functional information (e.g. lodestar, ETL1)./Helicase conserved C-termina…
gene_ID=unitig212_431	GT48	AA_permease_2	Amino acid permease.
gene_ID=unitig212_437	CE1	Esterase	Putative esterase. This family contains Esterase D. However it is not clear if all members of the family have the same function. This family is related to the pfam00135 family.
gene_ID=unitig212_442	GH130	FAD_binding_1/NAD_binding_1	FAD binding domain. This domain is found in sulfite reductase, NADPH cytochrome P450 reductase, Nitric oxide synthase and methionine synthase reductase./Oxidoreductase NAD-binding domain. Xanthine dehydrogenases, that also bind FAD/NAD, have essentially no similarity.
gene_ID=unitig212_444	CBM51	LIP	Secretory lipase. These lipases are expressed and secreted during the infection cycle of these pathogens. In particular, C. albicans has a large number of different lipases, possibly reflecting broad lipolytic activity, which may contribute to the persistence and virulence of C. albicans in human tissue.
gene_ID=unitig212_448	AA4/AA7	FAD_binding_4/FAD-oxidase_C	FAD binding domain. This family consists of various enzymes that use FAD as a co-factor, most of the enzymes are similar to oxygen oxidoreductase. One of the enzymes Vanillyl-alcohol oxidase (VAO) has a solved structure, the alignment includes the FAD binding site, called the PP-loop, between residues 99-110. The FAD molecule is covalently bound in the known structure, however the residue that li…
gene_ID=unitig212_454	CBM48	DnaJ/DnaJ-X	DnaJ domain. DnaJ domains (J-domains) are associated with hsp70 heat-shock system and it is thought that this domain mediates the interaction. DnaJ-domain is therefore part of a chaperone (protein folding) system. The T-antigens, although not in Prosite are confirmed as DnaJ containing domains from literature./X-domain of DnaJ-containing. IN certain plant and yeast proteins, the DnaJ-1 proteins h…
gene_ID=unitig212_463	GH10	NmrA	NmrA-like family. NmrA is a negative transcriptional regulator involved in the post-translational modification of the transcription factor AreA. NmrA is part of a system controlling nitrogen metabolite repression in fungi. This family only contains a few sequences as iteration results in significant matches to other Rossmann fold families.
gene_ID=unitig212_466	GT62	Anp1	Anp1. The members of this family (Anp1, Van1 and Mnn9) are membrane proteins required for proper Golgi function. These proteins co-localise within the cis Golgi, and that they are physically associated in two distinct complexes.
gene_ID=unitig212_471	CBM21	SUR7	SUR7/PalI family. This family consists of several fungal-specific SUR7 proteins. Its activity regulates expression of RVS161, a homologue of human endophilin, suggesting a function for both in endocytosis. The protein carries four transmembrane domains and is thus likely to act as an anchoring protein for the eisosome to the plasma membrane. Eisosomes are the immobile protein complexes, that incl…
gene_ID=unitig212_474	AA10	ubiquitin	Ubiquitin family. This family contains a number of ubiquitin-like proteins: SUMO (smt3 homologue), Nedd8, Elongin B, Rub1, and Parkin. A number of them are thought to carry a distinctive five-residue motif termed the proteasome-interacting motif (PIM), which may have a biologically significant role in protein delivery to proteasomes and recruitment of proteasomes to transcription sites.
gene_ID=unitig212_480	GH32	Ferric_reduct/FAD_binding_8	Ferric reductase like transmembrane component. This family includes a common region in the transmembrane proteins mammalian cytochrome B-245 heavy chain (gp9-1phox), ferric reductase transmembrane component in yeast and respiratory burst oxidase from mouse-ear cress. This may be a family of flavocytochromes capable of moving electrons across the plasma membrane. The Frp1 protein from S. pombe is …	gene codes for the beta chain of cytochrome B-245 and cytochrome B-245 is missing from patients with the disease./FAD-binding domain.
gene_ID=unitig212_481	GT90	Thioredoxin/Thioredoxin_6/Thioredoxin	Thioredoxin. Thioredoxins are small enzymes that participate in redox reactions, via the reversible oxidation of an active centre disulfide bond. Some members with only the active site are not separated from the noise./Thioredoxin-like domain. /Thioredoxin. Thioredoxins are small enzymes that participate in redox reactions, via the reversible oxidation of an active centre disulfide bond. Some mem…
gene_ID=unitig212_486	GT28/GT1	GRAM/Glyco_transf_28	GRAM domain. The GRAM domain is found in in glucosyltransferases, myotubularins and other putative membrane-associated proteins./Glycosyltransferase family 28 N-terminal domain. The glycosyltransferase family 28 includes monogalactosyldiacylglycerol synthase (EC 2.4.1.46) and UDP-N-acetylglucosamine transferase (EC 2.4.1.-). This N-terminal domain contains the acceptor binding site and likely mem…
gene_ID=unitig212_497	CBM48	DnaJ	DnaJ domain. DnaJ domains (J-domains) are associated with hsp70 heat-shock system and it is thought that this domain mediates the interaction. DnaJ-domain is therefore part of a chaperone (protein folding) system. The T-antigens, although not in Prosite are confirmed as DnaJ containing domains from literature.
gene_ID=unitig212_506	GT34	p450	Cytochrome P450. Cytochrome P450s are haem-thiolate proteins involved in the oxidative degradation of various compounds. They are particularly well known for their role in the degradation of environmental toxins and mutagens. They can be divided into 4 classes, according to the method by which electrons from NAD(P)H are delivered to the catalytic site. Sequence conservation is relatively low with…	general topography and structural fold are highly conserved. The conserved core is composed of a coil termed the 'meander', a four-helix bundle, helices J and K, and two sets of beta-sheets. These constitute the haem-binding loop (with an absolutely conserved cysteine that serves as the 5th ligand for the haem iron), the proton-transfer groove and the absolutely conserved EXXR motif in helix K. W…	general enzymatic function is to catalyze regiospecific and stereospecific oxidation of non-activated hydrocarbons at physiological temperatures.
gene_ID=unitig212_509	GT48	MFS_1	Major Facilitator Superfamily.
gene_ID=unitig212_522	CE11	SNF2_N/Helicase_C/HAND/SLIDE	SNF2 family N-terminal domain. This domain is found in proteins involved in a variety of processes including transcription regulation (e.g., SNF2, STH1, brahma, MOT1), DNA repair (e.g. ERCC6, RAD16, RAD5), DNA recombination (e.g. RAD54), and chromatin unwinding (e.g. ISWI) as well as a variety of other proteins with little functional information (e.g. lodestar, ETL1)./Helicase conserved C-termina…
gene_ID=unitig212_523	AA3	Pyr_redox_2	Pyridine nucleotide-disulphide oxidoreductase. This family includes both class I and class II oxidoreductases and also NADH oxidases and peroxidases. This domain is actually a small NADH binding domain within a larger FAD binding domain.
gene_ID=unitig212_527	GT48	MFS_1	Major Facilitator Superfamily.
gene_ID=unitig212_528	GH32	PfkB	pfkB family carbohydrate kinase. This family includes a variety of carbohydrate and pyrimidine kinases.
gene_ID=unitig212_547	AA1	Cu-oxidase_3/Cu-oxidase_2	Multicopper oxidase. This entry contains many divergent copper oxidase-like domains that are not recognised by the pfam00394 model./Multicopper oxidase. This entry contains many divergent copper oxidase-like domains that are not recognised by the pfam00394 model.
gene_ID=unitig212_556	GH32	PfkB	pfkB family carbohydrate kinase. This family includes a variety of carbohydrate and pyrimidine kinases.
gene_ID=unitig212_569	GT48	MFS_1	Major Facilitator Superfamily.
gene_ID=unitig212_570	AA6/GH130	Flavodoxin_1/FAD_binding_1/NAD_binding_1	Flavodoxin. /FAD binding domain. This domain is found in sulfite reductase, NADPH cytochrome P450 reductase, Nitric oxide synthase and methionine synthase reductase./Oxidoreductase NAD-binding domain. Xanthine dehydrogenases, that also bind FAD/NAD, have essentially no similarity.
gene_ID=unitig212_574	GT9	PNK3P	Polynucleotide kinase 3 phosphatase. Polynucleotide kinase 3 phosphatases play a role in the repair of single breaks in DNA induced by DNA-damaging agents such as gamma radiation and camptothecin.
gene_ID=unitig212_577	GT66	Pro_isomerase	Cyclophilin type peptidyl-prolyl cis-trans isomerase/CLD. The peptidyl-prolyl cis-trans isomerases, also known as cyclophilins, share this domain of about 109 amino acids. Cyclophilins have been found in all organisms studied so far and catalyze peptidyl-prolyl isomerisation during which the peptide bond preceding proline (the peptidyl-prolyl bond) is stabilised in the cis conformation. Mammalian…
gene_ID=unitig212_584	GT48	MFS_1	Major Facilitator Superfamily.
gene_ID=unitig212_591	CBM51	LIP	Secretory lipase. These lipases are expressed and secreted during the infection cycle of these pathogens. In particular, C. albicans has a large number of different lipases, possibly reflecting broad lipolytic activity, which may contribute to the persistence and virulence of C. albicans in human tissue.
gene_ID=unitig212_602	GT4	Ubie_methyltran/Methyltransf_31	ubiE/COQ5 methyltransferase family. /Methyltransferase domain. This family appears to be have methyltransferase activity.
gene_ID=unitig212_623	GH76	ADH_N/ADH_zinc_N	Alcohol dehydrogenase GroES-like domain. This is the catalytic domain of alcohol dehydrogenases. Many of them contain an inserted zinc binding domain. This domain has a GroES-like structure./Zinc-binding dehydrogenase.
gene_ID=unitig213_10	GT48	MFS_1	Major Facilitator Superfamily.
gene_ID=unitig213_25	CE11	DEAD/Helicase_C/RQC	DEAD/DEAH box helicase. Members of this family include the DEAD and DEAH box helicases. Helicases are involved in unwinding nucleic acids. The DEAD box helicases are involved in various aspects of RNA metabolism, including nuclear transcription, pre mRNA splicing, ribosome bio_	genesis, nucleocytoplasmic transport, translation, RNA decay and organellar _	gene expression./Helicase conserved C-terminal domain. The Prosite family is restricted to DEAD/H helicases, whereas this domain family is found in a wide variety of helicases and helicase related proteins. It may be that this is not an autonomously folding unit, but an integral part of the helicase./RQC domain. This DNA-binding domain is found in the RecQ helicase among others and has a helix-tu…
gene_ID=unitig213_27	GH28	Zn_clus	Fungal Zn(2)-Cys(6) binuclear cluster domain.
gene_ID=unitig213_36	GT48	AA_permease/AA_permease_2	Amino acid permease. /Amino acid permease.
gene_ID=unitig213_40	GT4	Abhydrolase_1	alpha/beta hydrolase fold. This catalytic domain is found in a very wide range of enzymes.
gene_ID=unitig213_41	GT20	Glyco_transf_20/Trehalose_PPase	Glycosyltransferase family 20. Members of this family belong to glycosyl transferase family 20. OtsA (Trehalose-6-phosphate synthase) is homologous to regions in the subunits of yeast trehalose-6-phosphate synthase/phosphate complex./Trehalose-phosphatase. This family consist of trehalose-phosphatases EC:3.1.3.12 these enzyme catalyze the de-phosphorylation of trehalose-6-phosphate to trehalose a…	genes in the E. coli otsBA operon otsA the trehalose-6-phosphate synthase and otsB trehalose-phosphatase (this family) have undergone _	gene fusion in most eukaryotes. Trehalose is a common disaccharide of bacteria, fungi and invertebrates that appears to play a major role in desiccation tolerance.
gene_ID=unitig213_43	GT48	RVT_1	Reverse transcriptase (RNA-dependent DNA polymerase). A reverse transcriptase _	gene is usually indicative of a mobile element such as a retrotransposon or retrovirus. Reverse transcriptases occur in a variety of mobile elements, including retrotransposons, retroviruses, group II introns, bacterial msDNAs, hepadnaviruses, and caulimoviruses.
gene_ID=unitig213_44	CE11	SNF2_N/Helicase_C/DUF4208	SNF2 family N-terminal domain. This domain is found in proteins involved in a variety of processes including transcription regulation (e.g., SNF2, STH1, brahma, MOT1), DNA repair (e.g. ERCC6, RAD16, RAD5), DNA recombination (e.g. RAD54), and chromatin unwinding (e.g. ISWI) as well as a variety of other proteins with little functional information (e.g. lodestar, ETL1)./Helicase conserved C-termina…
gene_ID=unitig213_49	GH132	SUN	Beta-glucosidase (SUN family). Members of this family include Nca3, Sun4 and Sim1. This is a family of yeast proteins, involved in a diverse set of functions (DNA replication, aging, mitochondrial bio_	genesis and cell septation). BGLA from Candida wickerhamii has been characterized as a Beta-glucosidase EC:3.2.1.21.
gene_ID=unitig213_56	GT30	Methyltransf_4	Putative methyltransferase. This is a family of putative methyltransferases. The aligned region contains the GXGXG S-AdoMet binding site suggesting a putative methyltransferase activity.
gene_ID=unitig213_74	CE11	DEAD/Helicase_C	DEAD/DEAH box helicase. Members of this family include the DEAD and DEAH box helicases. Helicases are involved in unwinding nucleic acids. The DEAD box helicases are involved in various aspects of RNA metabolism, including nuclear transcription, pre mRNA splicing, ribosome bio_	genesis, nucleocytoplasmic transport, translation, RNA decay and organellar _	gene expression./Helicase conserved C-terminal domain. The Prosite family is restricted to DEAD/H helicases, whereas this domain family is found in a wide variety of helicases and helicase related proteins. It may be that this is not an autonomously folding unit, but an integral part of the helicase.
gene_ID=unitig213_81	CE11	DEAD/Helicase_C	DEAD/DEAH box helicase. Members of this family include the DEAD and DEAH box helicases. Helicases are involved in unwinding nucleic acids. The DEAD box helicases are involved in various aspects of RNA metabolism, including nuclear transcription, pre mRNA splicing, ribosome bio_	genesis, nucleocytoplasmic transport, translation, RNA decay and organellar _	gene expression./Helicase conserved C-terminal domain. The Prosite family is restricted to DEAD/H helicases, whereas this domain family is found in a wide variety of helicases and helicase related proteins. It may be that this is not an autonomously folding unit, but an integral part of the helicase.
gene_ID=unitig213_85	CE11	DEAD/Helicase_C	DEAD/DEAH box helicase. Members of this family include the DEAD and DEAH box helicases. Helicases are involved in unwinding nucleic acids. The DEAD box helicases are involved in various aspects of RNA metabolism, including nuclear transcription, pre mRNA splicing, ribosome bio_	genesis, nucleocytoplasmic transport, translation, RNA decay and organellar _	gene expression./Helicase conserved C-terminal domain. The Prosite family is restricted to DEAD/H helicases, whereas this domain family is found in a wide variety of helicases and helicase related proteins. It may be that this is not an autonomously folding unit, but an integral part of the helicase.
gene_ID=unitig213_97	GT48	AA_permease/AA_permease_2	Amino acid permease. /Amino acid permease.
gene_ID=unitig213_102	GH32	Ferric_reduct/FAD_binding_8	Ferric reductase like transmembrane component. This family includes a common region in the transmembrane proteins mammalian cytochrome B-245 heavy chain (gp9-1phox), ferric reductase transmembrane component in yeast and respiratory burst oxidase from mouse-ear cress. This may be a family of flavocytochromes capable of moving electrons across the plasma membrane. The Frp1 protein from S. pombe is …	gene codes for the beta chain of cytochrome B-245 and cytochrome B-245 is missing from patients with the disease./FAD-binding domain.
gene_ID=unitig213_103	GT34	p450/CRAL_TRIO	Cytochrome P450. Cytochrome P450s are haem-thiolate proteins involved in the oxidative degradation of various compounds. They are particularly well known for their role in the degradation of environmental toxins and mutagens. They can be divided into 4 classes, according to the method by which electrons from NAD(P)H are delivered to the catalytic site. Sequence conservation is relatively low with…	general topography and structural fold are highly conserved. The conserved core is composed of a coil termed the 'meander', a four-helix bundle, helices J and K, and two sets of beta-sheets. These constitute the haem-binding loop (with an absolutely conserved cysteine that serves as the 5th ligand for the haem iron), the proton-transfer groove and the absolutely conserved EXXR motif in helix K. W…	general enzymatic function is to catalyze regiospecific and stereospecific oxidation of non-activated hydrocarbons at physiological temperatures./CRAL/TRIO domain.
gene_ID=unitig213_104	GT4	ABC_tran/ABC2_membrane	ABC transporter. ABC transporters for a large family of proteins responsible for translocation of a variety of compounds across biological membranes. ABC transporters are the largest family of proteins in many completely sequenced bacteria. ABC transporters are composed of two copies of this domain and two copies of a transmembrane domain pfam00664. These four domains may belong to a single polyp…
gene_ID=unitig213_105	GT48	MFS_1	Major Facilitator Superfamily.
