# Supplementary material for: Genome Sequence, Assembly and Characterization of Two Metschnikowia fructicola Strains Used as Biocontrol Agents of Postharvest Diseases
Source: Front Microbiol. 2018 Apr 3;9:593. doi: 10.3389/fmicb.2018.00593 (PMC5891927; doi:10.3389/fmicb.2018.00593)
Supplement: TABLE S3 — fpkm expression data and statistical differences among conditions analyzed with RNAseq. [file Table_3.XLSX]

## Sheet: Foglio1
	fpkm table					Control_vs_grapefruit_24h					Control_vs_pdig_24h					Control_vs_pdig_48h					grapefruit_24h_vs_pdig_24h
	Control (FPKM)	pdig_24h (FPKM)	pdig_48h (FPKM)	grapefruit_24h(FPKM)		logFC	logCPM	PValue	FDR		logFC	logCPM	PValue	FDR		logFC	logCPM	PValue	FDR		logFC	logCPM	PValue	FDR
unitig0_1	4.93	28.05	21.89	78.36		4.0213	6.12126	1.46e-07	1.14e-05		2.40681	4.75966	0.000956643	0.0374419		1.94401	4.44076	0.00725216	0.0394912		-1.64357	6.48564	0.0152901	0.142434
unitig0_2	4.94	17.99	21.3	3.14		-0.643905	2.2655	0.459963	0.732883		1.75343	3.73077	0.0174782	0.178025		1.89467	3.8918	0.0105256	0.0515152		2.36957	3.55704	0.00156792	0.029668
unitig0_3	2.01	2.27	3.91	2.42		0.301486	2.89835	0.729261	0.898498		0.0873419	2.84849	0.918602	1		0.77038	3.29231	0.309795	0.504375		-0.243032	2.96621	0.744483	0.945749
unitig0_4	4.35	3.77	5.31	5.19		0.287707	2.7022	0.734943	0.901432		-0.296791	2.47177	0.697454	0.922161		0.0577977	2.69373	0.954483	0.997762		-0.613559	2.60756	0.434448	0.785656
unitig0_5	14.47	13.5	16.95	5.09		-1.47104	3.40466	0.047676	0.213024		-0.201815	3.9365	0.804673	0.963598		0.0157695	4.09393	1	1		1.24102	3.32867	0.0895287	0.39881
unitig0_6_partial	3.05	5.41	7.8	9.9		1.72575	4.11394	0.0163365	0.110412		0.715212	3.48727	0.324489	0.710986		1.14787	3.82114	0.107552	0.252718		-1.03963	4.33742	0.133772	0.487525
unitig4_1	26.64	37.61	39.26	113.86		2.13345	6.1299	0.00213279	0.0272809		0.398156	4.98551	0.557324	0.853245		0.363292	5.017	0.594982	0.756355		-1.76424	6.25906	0.00958947	0.103291
unitig4_2	36.72	44.4	22.65	89.43		1.32191	7.85058	0.0477399	0.21305		0.178478	7.20232	0.786775	0.956296		-0.89425	6.78058	0.178873	0.354294		-1.17229	7.95528	0.0777128	0.374674
unitig4_3	6.28	11.34	19.43	7.56		0.310465	4.29415	0.667588	0.868183		0.75731	4.62541	0.275634	0.670757		1.43203	5.13446	0.0376117	0.125478		0.418054	4.71645	0.546101	0.850975
unitig4_4	6.15	12.7	32.87	19.07		1.67074	3.37737	0.0276669	0.151211		0.952579	2.94839	0.218309	0.60356		2.22452	3.92988	0.00300269	0.0212644		-0.747344	3.6746	0.305432	0.696568
unitig4_5	748.74	808.62	580.79	513.78		-0.505563	7.95618	0.442702	0.720509		0.0149055	8.26146	0.982899	1		-0.56455	8.04998	0.39139	0.585429		0.491638	8.01082	0.454941	0.799116
unitig4_6	168.29	160.47	83.4	347.48		1.08127	6.7133	0.105668	0.335496		-0.165934	6.05929	0.806762	0.964329		-1.21546	5.70282	0.0723234	0.195349		-1.27608	6.71208	0.0565857	0.309942
unitig4_7	37.6	70.35	89.99	60.89		0.731808	5.47578	0.277544	0.566109		0.806614	5.5902	0.233969	0.625349		1.06034	5.80817	0.117602	0.268054		0.0459596	5.87389	0.950329	1
unitig4_8	38.14	61.43	39.53	39.21		0.0792187	4.98464	0.912998	0.988087		0.594904	5.33978	0.379509	0.748569		-0.145938	4.9894	0.834638	0.920098		0.48689	5.34531	0.471109	0.808993
unitig4_9	8.3	16.64	25.71	18.53		1.1996	3.93913	0.0941076	0.311736		0.902762	3.80976	0.202305	0.581532		1.43295	4.22531	0.0444207	0.140684		-0.325788	4.29947	0.652871	0.907574
unitig4_10	4.76	4.12	8.9	6.47		0.493321	4.05793	0.489153	0.754155		-0.301621	3.70967	0.688752	0.917366		0.716428	4.31126	0.312119	0.507088		-0.823918	3.97967	0.241178	0.633944
unitig4_11	29.98	40.11	92.92	62.77		1.09641	4.96806	0.111067	0.344993		0.322796	4.55661	0.647052	0.9029		1.43009	5.32234	0.0371053	0.124117		-0.802541	5.11797	0.238055	0.630075
unitig4_12	3.1	0.71	3.35	1.86		-0.709218	1.55067	0.479616	0.747356		-2.18821	1.18516	0.0365207	0.259649		-0.152944	1.88763	0.925108	0.977898		-1.51023	0.745897	0.183672	0.56188
unitig4_13	0.3	0	2.41	0.2		-0.399285	-0.188664	1	1		-4.93006	-0.693518	0.285714	0.674324		2.84877	1.75686	0.0057595	0.0335371		-4.72094	-0.912238	0.285714	0.676159
unitig5_1	9.89	13.33	16.1	9.27		-0.059607	4.66447	0.951892	1		0.330033	4.93567	0.6314	0.896366		0.497327	5.08297	0.471541	0.656797		0.360856	4.88485	0.598732	0.879932
unitig5_2	17.14	8.79	4.29	15.18		-0.152338	3.01669	0.891888	0.978269		-1.05377	2.70859	0.177011	0.551827		-2.22174	2.44172	0.00694389	0.0380814		-0.930568	2.61275	0.210778	0.59698
unitig5_3	1.81	2.02	3.86	2.62		0.565726	3.46824	0.453721	0.728072		0.0643839	3.25577	0.968981	1		0.887569	3.78722	0.219493	0.403362		-0.53031	3.52456	0.466269	0.805876
unitig5_4	31.01	53.59	185.33	89.04		1.55821	7.16248	0.0207524	0.126962		0.692994	6.63826	0.298687	0.686727		2.37966	7.93318	0.000579407	0.00685591		-0.894081	7.42051	0.177213	0.553532
unitig5_5	188.1	150.84	340.04	86.03		-1.08883	6.51045	0.103793	0.331121		-0.413375	6.83004	0.53341	0.840531		0.656108	7.43955	0.321766	0.517215		0.646664	6.2908	0.330829	0.717839
unitig5_6	4.94	6.95	9.04	6.36		0.410505	4.68001	0.558679	0.800743		0.401023	4.74141	0.563109	0.856551		0.680569	4.95897	0.320035	0.515538		-0.0383225	4.90544	0.964848	1
unitig5_7	54.48	74.19	44.05	38.42		-0.46262	5.27423	0.497091	0.759262		0.350302	5.74108	0.600226	0.877605		-0.504766	5.37262	0.459375	0.645788		0.784157	5.53212	0.243798	0.636683
unitig5_8	1.76	4.42	1.59	1.48		-0.234322	2.58329	0.763086	0.916201		1.20541	3.48095	0.107908	0.439807		-0.349036	2.63927	0.680978	0.822599		1.41144	3.36788	0.0537498	0.303152
unitig5_9	10.7	22.08	15.19	6.68		-0.64092	4.61816	0.353253	0.641622		0.952413	5.52637	0.158717	0.529076		0.309817	5.1871	0.650799	0.799389		1.56467	5.30883	0.0224552	0.180944
unitig5_10	8.83	15.83	18.42	2.87		-1.55216	0.5984	0.189984	0.459351		0.739832	1.58159	0.479616	0.816178		0.853502	1.70074	0.369464	0.563765		2.26983	1.16354	0.0236304	0.186402
unitig5_11	4.85	3.74	7.88	5.87		0.306417	4.79779	0.667868	0.868183		-0.472283	4.48197	0.492243	0.826894		0.4962	5.02423	0.469528	0.655069		-0.807614	4.65163	0.2362	0.628687
unitig5_12	942.9	1214.23	1223.25	1312.41		0.514785	9.87757	0.432615	0.714965		0.268871	9.80492	0.681522	0.914114		0.176801	9.8067	0.787311	0.893346		-0.274755	10.0435	0.674755	0.918754
unitig9_1	0	0	0	0.72		5.64353	-0.0789967	0.0565217	0.23632		NA	NA	NA	NA		NA	NA	unitig9_1	-5.91172		0.0347826	0.236625
unitig9_2	9.6	11.06	12.69	29.6		1.65923	5.74726	0.015729	0.108209		0.105696	4.81432	0.891163	0.998589		0.202054	4.91653	0.776648	0.885597		-1.58249	5.81827	0.0203958	0.170392
unitig9_3	49.31	106.6	41.24	37.33		-0.359909	5.02857	0.595639	0.823731		1.01688	5.8618	0.131343	0.482511		-0.452186	5.10438	0.50988	0.688716		1.34805	5.72333	0.0464412	0.278024
unitig9_4	86.5	39.08	31.61	50.82		-0.731085	6.6472	0.270976	0.560425		-1.24326	6.54019	0.0638534	0.348782		-1.65358	6.47956	0.014973	0.065683		-0.541016	6.05552	0.417219	0.775096
unitig9_5	0	0	0	0		NA	NA	NA	NA		NA	NA	NA	NA		NA	NA	NA	NA
unitig9_6	8.96	9.76	20.05	13.04		0.565726	3.46824	0.453721	0.728072		0.0186877	3.23227	1	1		0.946874	3.82582	0.182526	0.358711		-0.576018	3.50622	0.426213	0.783224
unitig9_7	0.97	0.29	0.6	0.56		-0.717673	0.195257	0.585507	0.816474		-1.79097	-0.0390517	0.372947	0.742308		-0.910015	0.205046	0.585507	0.748745		-1.10617	-0.399291	0.726708	0.936767
unitig9_8	55.16	47.76	39.09	30.28		-0.828178	6.02322	0.216201	0.495119		-0.301507	6.30315	0.653612	0.904744		-0.693529	6.19027	0.298035	0.492679		0.497878	5.88647	0.455576	0.799569
unitig9_9	19.46	50.91	79.84	28.41		0.58385	5.25639	0.391323	0.68135		1.28847	5.78503	0.0576757	0.331566		1.83648	6.2441	0.00751529	0.0405427		0.675807	5.94997	0.313896	0.702905
unitig9_10	5.08	5.28	7.43	6.26		0.348627	2.87945	0.688962	0.878886		-0.023691	2.74675	1	1		0.336729	2.98883	0.669968	0.81385		-0.401271	2.89726	0.610979	0.885631
unitig9_11	16.86	18.05	22.62	10.33		-0.653001	3.96609	0.353054	0.641618		0.0100963	4.32956	1	1		0.229161	4.49573	0.756604	0.873553		0.634452	4.02281	0.360684	0.741322
unitig9_12	31.81	34.5	56.05	33.77		0.123119	6.57808	0.854724	0.960996		0.020084	6.59185	0.977454	1		0.616284	6.97457	0.352714	0.547261		-0.131874	6.63505	0.843191	0.981844
unitig9_13	5.47	12.12	14.03	5.33		-0.0124257	3.69598	1	1		1.04833	4.38591	0.134318	0.489027		1.15227	4.50851	0.0990672	0.238868		1.0321	4.34517	0.13994	0.501594
unitig9_14	227.83	110.18	76.4	120.68		-0.878393	6.6713	0.1869	0.455876		-1.14471	6.64847	0.0874773	0.399748		-1.77607	6.52874	0.00903796	0.0463872		-0.295146	6.09172	0.660396	0.911309
unitig9_15	1.96	0.22	1.77	0.21		-2.78966	0.613111	0.0536329	0.228829		-2.91269	0.620813	0.0141459	0.155651		-0.368586	1.30899	0.683327	0.823486		-0.147005	-0.724499	1	1
unitig9_16	2.31	1.27	3.04	0		-5.26095	-0.494328	0.161491	0.422726		-0.924831	-0.0497315	0.521739	0.835519		0.1896	0.390952	1	1		4.57099	-0.922203	0.285714	0.676159
unitig9_17	3.97	3.13	3.64	3.56		-0.142118	2.3243	0.8871	0.976039		-0.425569	2.25474	0.600141	0.877605		-0.33878	2.3403	0.669495	0.81385		-0.312302	2.16251	0.734719	0.940191
unitig9_18	90.58	29.79	19.14	32.43		-1.4484	5.61391	0.0338834	0.172171		-1.69879	5.6145	0.0135549	0.154028		-2.44806	5.5162	0.000556254	0.00667319		-0.279202	4.65685	0.695216	0.927647
unitig9_19	0.71	1.12	45.83	9.18		3.60514	3.14248	3.48e-05	0.00123854		0.450309	0.926425	0.725047	0.931553		5.69144	5.19384	1.71e-10	8.51e-08		-3.18655	3.16718	8.21e-05	0.00314187
unitig9_20	5.09	4.82	6.77	2.29		-1.12726	3.63328	0.120456	0.360643		-0.186206	4.07009	0.803841	0.963598		0.198777	4.3163	0.800837	0.901699		0.912607	3.56964	0.202305	0.584186
unitig9_21	231.09	227.25	323.33	153.15		-0.555656	7.04515	0.400416	0.688097		-0.119664	7.30488	0.856998	0.986201		0.285448	7.56496	0.665551	0.810702		0.40717	7.02192	0.537897	0.84854
unitig9_22	21.57	18.38	16.71	19.04		-0.144407	5.09505	0.839559	0.954261		-0.327663	5.07592	0.630584	0.896224		-0.572101	5.02152	0.40582	0.59798		-0.212089	4.98078	0.753737	0.949677
unitig9_23	17.41	10.88	7.38	12.27		-0.470614	5.69966	0.486492	0.75266		-0.776678	5.64376	0.248194	0.641237		-1.43718	5.48061	0.0356961	0.120752		-0.3349	5.35229	0.620552	0.891026
unitig9_24	0	0	0	6.59		8.89752	2.54587	1.47e-07	1.14e-05		NA	NA	NA	NA		NA	NA	unitig9_24	-9.17017		2.87e-08	3.01e-06
unitig9_25	1.18	2.68	19.75	3.39		1.54642	3.22553	0.0433674	0.200586		1.08137	2.97265	0.159851	0.530368		3.85191	5.27624	7.12e-07	6.42e-05		-0.494175	3.58931	0.482914	0.818568
unitig9_26	13.23	2.77	7.55	12.63		-0.0715463	2.46605	1	1		-2.41163	1.77727	0.00666491	0.106111		-1.05992	2.15968	0.198245	0.378722		-2.37148	1.76077	0.0109335	0.11248
unitig9_27	7.39	9.73	4.55	5.27		-0.457176	2.65551	0.561338	0.802522		0.275531	3.0763	0.724796	0.931553		-0.889899	2.58771	0.244179	0.431856		0.704318	2.8625	0.355639	0.736172
unitig9_28	29.02	34.15	20.48	10.28		-1.45952	6.20822	0.0308484	0.160903		0.138299	6.90084	0.83709	0.976408		-0.700157	6.5714	0.292398	0.487244		1.56907	6.35612	0.020374	0.170392
unitig9_29	0	7.15	7.15	8.27		7.94219	1.69215	1.8e-05	0.000727611		7.66784	1.47639	7.45e-05	0.00684229		7.63981	1.47699	7.45e-05	0.00191432		-0.377119	2.38978	0.633648	0.897168
unitig9_30	6.72	11.92	22.9	16.16		1.2992	3.1694	0.0849699	0.294193		0.727452	2.86377	0.352333	0.73022		1.56592	3.48312	0.0350819	0.119197		-0.600867	3.42694	0.415387	0.774069
unitig9_31	3.93	16.08	26.5	11.15		1.53325	4.90811	0.0279591	0.15198		1.92893	5.27785	0.00592007	0.0979211		2.54627	5.8338	0.000335524	0.00488923		0.366806	5.71918	0.586472	0.875043
unitig9_32	2.47	6.61	7.39	6.81		1.50797	4.18894	0.0342637	0.173409		1.32936	4.13014	0.0639949	0.348782		1.39266	4.22776	0.0497986	0.151214		-0.207559	4.68951	0.768732	0.95465
unitig9_33	13.95	1.91	3.04	5.98		-1.16358	2.08155	0.181118	0.450695		-2.93938	1.74906	0.00276276	0.0655585		-2.34652	1.87631	0.00873716	0.0453094		-1.80735	0.933605	0.0967864	0.415422
unitig9_34	6.08	9.31	14.56	6.23		0.0982857	2.26346	0.94052	1		0.521848	2.5596	0.539497	0.843323		1.05688	2.94586	0.172071	0.344548		0.394996	2.55392	0.63273	0.897077
unitig9_35	1.55	1.53	0.59	0.62		-1.29157	1.09969	0.219277	0.499276		-0.154843	1.57189	0.909315	1		-1.70387	1.06528	0.119582	0.271339		1.1109	1.07251	0.253153	0.64527
unitig9_36	2.79	4.44	3.48	1.28		-1.07426	2.5752	0.180992	0.450695		0.582683	3.40657	0.431878	0.780075		0.115691	3.19389	0.901936	0.963974		1.62909	3.04189	0.0284478	0.210982
unitig9_37	99.97	91.99	23.63	29.79		-1.70524	5.83824	0.0126638	0.0938856		-0.21578	6.41824	0.746648	0.942255		-2.27674	5.83572	0.00114395	0.0109664		1.46076	5.72514	0.031711	0.225741
unitig9_38	48.09	109.14	12.52	24.61		-0.927893	5.92264	0.166134	0.429954		1.08556	7.02466	0.104193	0.432592		-2.13522	5.71974	0.00221436	0.0172513		1.9847	6.7582	0.0036966	0.0544976
unitig9_39	1.81	1.45	2.38	2.67		0.689918	0.995291	0.612094	0.833589		-0.314777	0.572818	1	1		0.257222	0.873014	0.854437	0.931873		-1.03543	0.86876	0.361697	0.741322
unitig9_40	103.55	110.17	72.89	114.15		0.177335	7.13267	0.789924	0.926711		-0.00763375	7.10408	0.993214	1		-0.705893	6.84756	0.286948	0.480361		-0.21381	7.17713	0.746706	0.946304
unitig9_41	116.22	130.18	98.17	38.02		-1.57474	8.03742	0.0190377	0.121309		0.067808	8.72177	0.918273	1		-0.441839	8.53445	0.501361	0.682461		1.61374	8.13062	0.0162825	0.147622
unitig9_42	0	0	0	0		NA	NA	NA	NA		NA	NA	NA	NA		NA	NA	NA	NA
unitig9_43	90.02	54.33	32.88	43.95		-0.997729	7.26186	0.133061	0.380079		-0.824069	7.38878	0.213859	0.597476		-1.65107	7.19111	0.0144592	0.0639915		0.144836	6.81728	0.826842	0.978247
unitig9_44	5.91	7.04	7.35	4.28		-0.414031	2.45703	0.644988	0.855431		0.152953	2.79168	0.873769	0.992081		0.113238	2.82038	0.916668	0.973952		0.538593	2.58802	0.499021	0.829722
unitig9_45	113.84	67.74	32.82	30.73		-1.84966	6.08298	0.00702732	0.0637511		-0.844835	6.43641	0.206551	0.58789		-1.99552	6.16746	0.00370734	0.0246442		0.976094	5.52079	0.14833	0.510404
unitig9_46	2.99	2.09	2.08	2.07		-0.50352	4.1593	0.46897	0.73933		-0.615621	4.1769	0.37396	0.742308		-0.731492	4.18044	0.295432	0.491268		-0.140892	3.88558	0.860243	0.986423
unitig9_47	2.03	2.37	4.57	1.54		-0.41239	1.58541	0.732196	0.900075		0.134058	1.89912	0.925108	1		0.966956	2.43569	0.241443	0.428912		0.518459	1.69493	0.579401	0.873296
unitig9_48	23.23	9.56	10.09	25.84		0.190057	5.13547	0.784354	0.925571		-1.37882	4.56297	0.0472964	0.298614		-1.40122	4.60564	0.0444238	0.140684		-1.59788	4.69847	0.0214204	0.176292
unitig9_49	5.62	4.15	3.07	4.93		-0.169195	3.10882	0.831006	0.950526		-0.54159	3.00415	0.460841	0.803786		-1.08173	2.84527	0.16191	0.331008		-0.401271	2.89726	0.610979	0.885631
unitig9_50	23.91	34.59	12.01	5.8		-1.99791	4.37651	0.00495419	0.0488756		0.438694	5.36701	0.521419	0.835519		-1.18392	4.6977	0.0875829	0.220622		2.4083	4.7908	0.000780581	0.0180792
unitig9_51	1.44	1.47	0.96	0.82		-0.824868	1.79768	0.371253	0.660681		-0.0574213	2.18181	1	1		-0.76042	1.91778	0.351957	0.547188		0.739726	1.82015	0.391806	0.759338
unitig9_52	18.75	32.92	30.08	47.88		1.38564	4.2762	0.0504333	0.220825		0.714043	3.89627	0.325181	0.711056		0.481594	3.80759	0.507102	0.686781		-0.70058	4.53943	0.31136	0.700408
unitig9_53	25.8	31.1	37.85	12.98		-0.944746	3.8421	0.18045	0.450194		0.177691	4.40144	0.813689	0.967364		0.354226	4.54967	0.618363	0.776523		1.09392	4.0136	0.123607	0.470507
unitig9_54	37.37	18.25	10.72	20.81		-0.807883	4.14764	0.251884	0.539025		-1.11992	4.10157	0.111716	0.446152		-1.98536	3.91741	0.00705098	0.0385441		-0.34085	3.60428	0.632455	0.897077
unitig9_55	8.88	4.2	2.94	2.36		-1.86311	3.6123	0.0113769	0.087209		-1.17343	3.85785	0.0965983	0.416191		-1.7912	3.73346	0.0151303	0.0660997		0.6614	2.87799	0.384293	0.755836
unitig9_56	12.44	5.78	3.88	6.1		-0.99202	4.81415	0.146343	0.402253		-1.19192	4.81283	0.0849821	0.395525		-1.87116	4.68106	0.00806652	0.0428799		-0.2287	4.19924	0.749012	0.947406
unitig9_57	0	0	0	0		NA	NA	NA	NA		NA	NA	NA	NA		NA	NA	NA	NA
unitig9_58	13.03	3.12	4.71	4.06		-1.63432	3.52216	0.0264022	0.147303		-2.12224	3.4692	0.00495982	0.0888378		-1.64452	3.6242	0.0258833	0.0965671		-0.516711	2.3709	0.505261	0.833775
unitig9_59	1.33	0.49	0.89	0		-5.83332	-0.163618	0.0347826	0.174636		-1.49781	0.203017	0.266667	0.660353		-0.60104	0.501692	0.822492	0.913743		4.57099	-0.922203	0.285714	0.676159
unitig9_60	8.82	18.08	22.29	14.63		0.764608	5.1934	0.259331	0.548074		0.934649	5.37002	0.166346	0.538804		1.13397	5.5554	0.0942839	0.230719		0.141197	5.65096	0.837977	0.980616
unitig9_61	501.52	423.3	468.03	706.42		0.531392	7.86719	0.420113	0.707154		-0.341403	7.48286	0.605505	0.881006		-0.299161	7.55295	0.650339	0.799319		-0.901646	7.78846	0.172862	0.548001
unitig9_62	11.91	98.25	21.5	5.49		-1.07638	5.07724	0.116303	0.353519		2.94598	7.70492	3.22e-05	0.00363466		0.651585	6.00183	0.329578	0.525476		3.99373	7.58089	7.91e-08	7.61e-06
unitig9_63	15.5	6.92	21.4	4.8		-1.66065	2.78539	0.0353346	0.176048		-1.27593	2.94751	0.0998133	0.423565		0.250113	3.64837	0.738386	0.861806		0.356612	2.05137	0.708588	0.932244
unitig9_64	67.24	103.46	83.3	136.47		1.05905	8.0658	0.110393	0.343911		0.525652	7.79491	0.42532	0.775688		0.110265	7.61558	0.86825	0.942027		-0.562248	8.30724	0.392634	0.759437
unitig9_65	10.71	11.96	34.49	19.27		0.879353	4.0886	0.216406	0.495319		0.0501406	3.67473	0.97646	1		1.47695	4.6199	0.0356197	0.12059		-0.858211	4.13973	0.213069	0.600075
unitig9_66	26.36	64.59	63.54	20.87		-0.29877	5.84133	0.655436	0.863447		1.19542	6.76868	0.0742258	0.372186		1.06943	6.73386	0.10925	0.255499		1.46541	6.65598	0.0297145	0.215897
unitig9_67	3.2	2.43	1.85	0.86		-1.75778	1.38793	0.0694193	0.263556		-0.462062	1.856	0.63737	0.898309		-0.968346	1.70135	0.283853	0.478484		1.27019	1.17023	0.177284	0.553532
unitig9_68	22.99	13.93	8.88	14.4		-0.639306	4.5585	0.359464	0.649277		-0.815794	4.55491	0.235307	0.627138		-1.58052	4.36334	0.0253906	0.0952738		-0.205292	4.17465	0.772602	0.956388
unitig9_69	0.88	2.62	2.93	3.22		2.01484	1.35035	0.0638717	0.251334		1.60238	1.13833	0.148066	0.512309		1.68421	1.24581	0.119582	0.271339		-0.442901	1.74031	0.651531	0.906752
unitig9_70	8.46	21.88	43.19	5.85		-0.505019	3.55732	0.504157	0.763234		1.26914	4.62535	0.0680714	0.359096		2.14792	5.34245	0.00229018	0.0176475		1.74567	4.45832	0.0136923	0.131748
unitig9_71	61.31	29.4	14.04	18.8		-1.66154	5.42112	0.0159764	0.108854		-1.15502	5.62665	0.0884701	0.401986		-2.32454	5.39797	0.000984908	0.00989425		0.477808	4.69849	0.482211	0.81754
unitig9_72	152.58	137.3	51.83	48.83		-1.60719	6.29487	0.018094	0.117681		-0.248382	6.83534	0.707029	0.92541		-1.75429	6.37545	0.00997745	0.0499108		1.33006	6.15929	0.0482131	0.284019
unitig9_73	65.41	21.14	28.54	14.53		-2.13184	6.3808	0.00206477	0.0268166		-1.72292	6.53231	0.0111879	0.139183		-1.3956	6.66692	0.0382237	0.126478		0.380166	5.2287	0.570959	0.866783
unitig9_74	48.51	73.68	54.85	31.01		-0.606481	6.2871	0.363979	0.652831		0.507602	6.90271	0.442163	0.787531		-0.0221459	6.66634	0.975252	1		1.08529	6.65767	0.104449	0.433797
unitig9_75	12.35	19.73	38.2	95.36		2.97033	5.33983	4.85e-05	0.00158182		0.566195	3.6003	0.43206	0.780075		1.41702	4.21385	0.0474406	0.146967		-2.43332	5.45529	0.000579961	0.0144174
unitig9_76	9.93	4.93	6.26	6.35		-0.606751	4.85054	0.376379	0.664638		-1.11013	4.73253	0.105926	0.436759		-0.863813	4.867	0.209345	0.391725		-0.532232	4.34271	0.444994	0.792034
unitig9_77	2.78	5.02	2.91	2.58		-0.0716971	3.42032	0.944381	1		0.755264	3.94913	0.292453	0.680806		-0.123742	3.50872	0.894017	0.958811		0.798324	3.88751	0.26367	0.65681
unitig9_78	6.34	3.99	1.78	2.99		-1.02264	2.07676	0.244669	0.528938		-0.780099	2.21745	0.356891	0.734068		-1.97571	1.90076	0.0269514	0.0994994		0.2144	1.69869	0.85396	0.984798
unitig9_79	14.45	8.33	11.08	16.12		0.199794	4.11093	0.791603	0.927992		-0.877598	3.69075	0.2153	0.599247		-0.57547	3.85741	0.428531	0.619996		-1.10642	3.81411	0.122719	0.468965
unitig9_80	10.62	9.33	12.97	13.72		0.407894	5.96466	0.545451	0.790026		-0.280912	5.67794	0.676724	0.911689		0.0933972	5.91134	0.896157	0.959974		-0.717676	5.89876	0.280828	0.676159
unitig9_81	2.64	6.39	7.01	1.72		-0.589677	2.23623	0.499294	0.759262		1.19618	3.27801	0.11755	0.456792		1.22222	3.34868	0.105747	0.250182		1.75798	3.07842	0.0183767	0.160267
unitig9_82	38.4	37.97	44.42	22.98		-0.70174	3.60045	0.334789	0.623214		-0.112992	3.92156	0.880773	0.994668		0.0111035	4.03389	1	1		0.560156	3.58549	0.430296	0.784786
unitig9_83	100.62	53.65	70.89	75		-0.387925	6.38745	0.561075	0.802522		-1.00538	6.21612	0.132897	0.486263		-0.703176	6.37565	0.290747	0.484902		-0.646305	5.9569	0.332663	0.719213
unitig9_84	6.42	12.08	30.69	2.99		-1.07426	2.5752	0.180992	0.450695		0.821959	3.55418	0.264114	0.658119		2.06658	4.50084	0.00443727	0.0279272		1.86841	3.2205	0.0120401	0.120358
unitig9_85	0.42	1.06	1.43	0.54		0.559569	-0.196955	1	1		1.22286	0.162105	0.585507	0.867895		1.51101	0.368821	0.442579	0.630853		0.636047	0.178627	0.63315	0.897077
unitig9_86	13.72	14.36	10.82	8.55		-0.668091	3.4032	0.37455	0.662581		-0.0378479	3.7481	0.977656	1		-0.544147	3.56417	0.441081	0.63052		0.60169	3.43296	0.415387	0.774069
unitig9_87	11.84	17.25	9.4	16.09		0.478289	5.44947	0.482432	0.749671		0.444356	5.49674	0.512146	0.835519		-0.533723	5.06185	0.432353	0.62225		-0.0627769	5.6946	0.928477	1
unitig9_88	8.23	6.61	5.49	5.44		-0.543967	2.09048	0.558636	0.800743		-0.42069	2.19964	0.647858	0.9029		-0.810327	2.08518	0.354733	0.549691		0.0948386	1.91769	0.93615	1
unitig9_89	0.21	1.08	0.23	0.17		0.161023	-0.345433	1	1		2.48526	0.952938	0.06403	0.348782		-0.0270594	-0.341851	1	1		2.30169	0.844369	0.0381992	0.249664
unitig9_90	6.46	5.39	5.48	0.99		-2.66858	2.67148	0.00119786	0.0179572		-0.363383	3.37347	0.641364	0.900082		-0.433459	3.39127	0.562685	0.729645		2.27902	2.47318	0.0064056	0.0812878
unitig9_91	43.43	45.72	12.79	19		-1.15193	5.06585	0.0928818	0.309793		-0.0215272	5.58897	0.980777	1		-1.96588	4.96654	0.00520534	0.0313181		1.10172	5.10127	0.107052	0.440312
unitig9_92	6.49	5.83	3.07	1.63		-1.9192	2.90796	0.0142848	0.100732		-0.246274	3.52911	0.746206	0.94204		-1.27279	3.17878	0.0913856	0.226859		1.64538	2.80331	0.0327713	0.229068
unitig9_93	2.94	2.55	1.5	3.39		0.215394	2.25906	0.82277	0.946079		-0.339563	2.0489	0.734082	0.935865		-1.22529	1.7532	0.169557	0.341271		-0.584069	2.14183	0.489124	0.823958
unitig9_94	31.68	10.65	24.52	11.66		-1.40327	4.25949	0.0474048	0.212405		-1.66341	4.25185	0.0194931	0.187532		-0.570734	4.65891	0.404776	0.597446		-0.288894	3.34709	0.705811	0.931086
unitig9_95	22.49	24.01	26.41	19.06		-0.20704	4.70333	0.7688	0.917838		-0.00524797	4.86705	1	1		0.0308891	4.93629	0.969616	1		0.173001	4.74674	0.806482	0.971315
unitig9_96	502.87	1857.76	2628.92	2042.85		2.05929	8.88126	0.00247903	0.030202		1.78866	8.7344	0.00803291	0.116684		2.18668	9.10333	0.00137684	0.0123872		-0.299479	9.49007	0.647631	0.90459
unitig9_97	8.97	19.75	18.87	6.89		-0.347686	2.99427	0.676549	0.872252		1.04002	3.83515	0.146714	0.51186		0.87541	3.77937	0.219493	0.403362		1.3593	3.69133	0.0621367	0.326826
unitig9_98	23.49	9.5	3.22	13.37		-0.766837	4.45706	0.269218	0.558861		-1.39799	4.3121	0.0473877	0.298967		-3.0865	4.03966	6e-05	0.00167852		-0.660033	3.80507	0.348923	0.730782
unitig9_99	160.94	118.5	123.2	58.66		-1.41889	7.97345	0.0339412	0.172356		-0.537478	8.33847	0.41395	0.767017		-0.584605	8.37067	0.374388	0.56772		0.85259	7.64882	0.197357	0.579491
unitig9_100	85.65	38.58	16.04	62.89		-0.408728	6.21764	0.540305	0.787783		-1.24746	5.97809	0.0646688	0.35068		-2.61859	5.73328	0.000233421	0.00392147		-0.8676	5.69333	0.1977	0.580099
unitig9_101	40.07	54.83	37.92	17.49		-1.154	5.13976	0.0928261	0.309793		0.355878	5.86386	0.596795	0.875769		-0.277986	5.59182	0.684655	0.824548		1.4812	5.44104	0.0300323	0.217407
unitig9_102	298.25	423.79	612.25	117.89		-1.30121	7.7536	0.0514337	0.223524		0.409972	8.54947	0.532715	0.83997		0.838137	8.86052	0.203869	0.385302		1.68237	8.09828	0.0124417	0.123355
unitig9_103	131.74	92.8	52.49	143.81		0.164639	7.53776	0.803689	0.935275		-0.60153	7.2494	0.363459	0.739336		-1.5248	6.99855	0.0234886	0.09013		-0.795019	7.33614	0.229991	0.622358
unitig9_104	2.38	13.86	21.44	18.7		2.99517	3.43167	0.000214192	0.00486827		2.42954	3.03727	0.00301933	0.0686168		2.96034	3.53079	0.000243875	0.00403321		-0.595145	3.99569	0.387612	0.757916
unitig9_105	23.58	79.32	140	41.74		0.864418	5.2997	0.203067	0.476528		1.65542	5.92223	0.0154262	0.163836		2.37101	6.54362	0.000691446	0.00778014		0.762176	6.15087	0.253007	0.64527
unitig9_106	17.36	47.69	90.36	20.56		0.28536	4.72566	0.684351	0.87671		1.36213	5.47796	0.0463713	0.295925		2.18042	6.15777	0.00173809	0.0146872		1.048	5.53084	0.119822	0.465293
unitig9_107	33.77	30.3	13.61	28.83		-0.190481	4.84217	0.789294	0.926641		-0.252564	4.87881	0.714683	0.929191		-1.49914	4.47528	0.0314266	0.110816		-0.0909017	4.76115	0.89376	0.995147
unitig9_108	0	0	0	0		NA	NA	NA	NA		NA	NA	NA	NA		NA	NA	NA	NA
unitig12_1	9.71	11.13	10.28	34.26		1.85869	5.91164	0.00699507	0.0635267		0.101547	4.8235	0.891829	0.998589		-0.114825	4.76523	0.875366	0.94715		-1.78611	5.98014	0.00885166	0.0995166
unitig12_2	5.83	20.59	59.57	10.76		0.934932	3.85433	0.18699	0.455876		1.73297	4.48673	0.0148098	0.159625		3.16474	5.72639	1.69e-05	0.000665355		0.769229	4.7167	0.263024	0.656166
unitig12_3	83.13	125.69	110.76	22.87		-1.82449	5.57756	0.00808899	0.070435		0.50161	6.56297	0.452551	0.79822		0.216401	6.45374	0.745977	0.86637		2.29746	6.02781	0.000987814	0.0215817
unitig12_4	424.81	202.71	116.23	60.98		-2.7621	7.2253	8.71e-05	0.00245563		-1.16458	7.62694	0.0800925	0.386456		-2.06737	7.45323	0.00248431	0.0186318		1.56879	6.322	0.0205775	0.171351
unitig12_5	28.39	20.98	23.96	10.81		-1.30835	2.60644	0.101288	0.325624		-0.506873	2.95268	0.537095	0.842569		-0.446102	3.02705	0.554174	0.723325		0.773488	2.35063	0.32241	0.709908
unitig12_6	53.58	38.63	23.59	44.32		-0.235899	6.46786	0.725253	0.896403		-0.567923	6.39046	0.392416	0.752977		-1.38213	6.1631	0.0407513	0.13201		-0.360865	6.23867	0.589713	0.876095
unitig12_7	41.4	28.79	34.17	30.24		-0.415733	7.04232	0.52957	0.779105		-0.619518	7.02468	0.349758	0.73022		-0.476862	7.13403	0.471327	0.656769		-0.232622	6.7711	0.725339	0.936767
unitig12_8	4.21	4.67	4.29	2.97		-0.462763	2.48227	0.564607	0.805424		0.041677	2.77996	1	1		-0.162145	2.7272	0.867417	0.941672		0.476036	2.5526	0.558578	0.858799
unitig12_9	12.46	12.14	10.03	6.09		-0.969233	2.99085	0.190097	0.459351		-0.120657	3.40561	0.887234	0.998589		-0.501156	3.2801	0.513635	0.692654		0.820269	2.97451	0.268826	0.663224
unitig12_10	3.96	58.27	117.52	8.06		1.07034	3.36551	0.145502	0.401449		3.79519	5.65487	6.36e-07	0.000191941		4.70414	6.55968	2.33e-09	6e-07		2.69613	5.71435	0.000154345	0.00521266
unitig12_11	22.8	29.66	93.69	10.8		-1.04185	5.42038	0.123737	0.36644		0.282337	6.06698	0.671472	0.910153		1.83961	7.16453	0.0068453	0.037638		1.29547	5.66255	0.0554382	0.308163
unitig12_12	53.5	72.41	50.26	72.08		0.462663	5.51127	0.495009	0.75752		0.335384	5.50564	0.625852	0.891935		-0.294376	5.23711	0.663129	0.808796		-0.156126	5.70538	0.818907	0.974675
unitig12_13	376.04	1245.11	463.67	5013.3		3.77427	12.1066	2.25e-07	1.66e-05		1.63099	10.3326	0.0149746	0.160858		0.10313	9.40187	0.875228	0.947122		-2.17212	12.3562	0.0014407	0.0283085
unitig12_14	2.12	2.74	3.3	1.98		-0.0370901	2.13105	1	1		0.303459	2.37018	0.726541	0.931553		0.45509	2.50585	0.603651	0.764257		0.312026	2.31464	0.705766	0.931086
unitig12_15	5.09	8.92	22.48	16.98		1.76914	4.94451	0.0119553	0.0903457		0.71184	4.27788	0.307693	0.695087		1.93735	5.19622	0.00565899	0.0332611		-1.08629	5.17454	0.108102	0.442909
unitig12_16	57.82	174.3	187.04	34.94		-0.689371	4.70361	0.320788	0.609494		1.49727	6.01076	0.0280914	0.226401		1.4951	6.06101	0.0275627	0.100794		2.15799	5.82731	0.00188132	0.0336455
unitig12_17	49.44	95.4	241.65	47.29		-0.0250857	5.9284	0.974613	1		0.852853	6.49681	0.20107	0.579558		2.09004	7.4524	0.00226717	0.0175179		0.849133	6.46205	0.202028	0.584186
unitig12_18	9.29	39.81	72.08	28.34		1.64236	4.80571	0.0185707	0.119041		1.99885	5.14933	0.00458546	0.085575		2.75471	5.82748	0.000123842	0.00265993		0.327594	5.62006	0.626239	0.892813
unitig12_19	17.9	69.88	127.51	107.25		2.6201	4.93848	0.000333263	0.00680614		1.87149	4.4014	0.00918612	0.125962		2.63349	5.0725	0.000281639	0.00436823		-0.77764	5.42363	0.245732	0.638781
unitig12_20	13.41	26.49	39.67	16.11		0.307802	4.37447	0.671131	0.86866		0.887254	4.79008	0.20014	0.578456		1.36524	5.16825	0.0487414	0.149556		0.550667	4.87305	0.419714	0.778027
unitig12_21	17.64	40.24	48.57	9.32		-0.885938	4.47596	0.20162	0.475111		1.0952	5.57182	0.106269	0.436759		1.26238	5.73921	0.0638487	0.177797		1.95254	5.31292	0.00506228	0.0686608
unitig12_22	5.89	9.89	11.83	6.15		0.121451	2.80232	0.916668	0.989079		0.650687	3.16664	0.402827	0.756498		0.805505	3.31446	0.295371	0.491262		0.5006	3.17238	0.521287	0.841204
unitig12_23	18.86	27.8	18.51	11.95		-0.622538	4.05325	0.38419	0.673647		0.471229	4.65602	0.498541	0.829181		-0.224353	4.34053	0.761191	0.875298		1.06515	4.40137	0.125041	0.471709
unitig12_24	6.11	5.69	9.09	6.94		0.240397	2.62538	0.76926	0.917838		-0.198359	2.46646	0.843823	0.979094		0.385343	2.82075	0.63273	0.787054		-0.467747	2.56849	0.558578	0.858799
unitig12_25	5.04	4.4	7.15	8.66		0.815368	4.62772	0.242939	0.527626		-0.296596	4.08605	0.670598	0.90926		0.299902	4.43917	0.681207	0.822684		-1.14095	4.56793	0.10027	0.42409
unitig12_26	15.52	18.95	19.3	32.56		1.11075	4.66531	0.109515	0.342666		0.201047	4.17767	0.784106	0.955257		0.119694	4.1851	0.865556	0.940494		-0.938667	4.76886	0.169879	0.544159
unitig12_27	73.69	84.81	112.95	45.89		-0.643929	5.75523	0.336066	0.624081		0.104807	6.16288	0.879351	0.994067		0.415438	6.38397	0.531736	0.704636		0.719954	5.86641	0.279951	0.675776
unitig12_28	15.79	43.29	16.15	11.47		-0.414915	3.41441	0.575233	0.81263		1.35888	4.50686	0.0519097	0.314359		-0.16727	3.64074	0.831828	0.918396		1.74532	4.36361	0.0130593	0.127325
unitig12_29	21.42	17.08	22.3	17.64		-0.244929	5.23988	0.721202	0.896403		-0.424631	5.22539	0.53464	0.841684		-0.141399	5.4054	0.839135	0.923167		-0.208532	5.0747	0.768617	0.95465
unitig12_30	5.47	4.81	8.64	10.11		0.901644	2.35925	0.287651	0.573877		-0.29315	1.77614	0.84052	0.977408		0.471608	2.21797	0.587167	0.749891		-1.22447	2.27076	0.131019	0.48111
unitig12_31	318.82	535	154.63	37.27		-3.05881	7.9666	1.67e-05	0.000690449		0.650958	9.23341	0.32215	0.709972		-1.24245	8.43044	0.0617504	0.174224		3.68102	8.59796	4.47e-07	3.38e-05
unitig12_32	2.85	2.03	1.6	2.52		-0.134103	4.52196	0.85492	0.961057		-0.580321	4.38848	0.398416	0.754188		-1.02713	4.27036	0.142321	0.30553		-0.475084	4.2973	0.493125	0.826294
unitig12_33	8.53	7.16	5.43	6.76		-0.277643	3.2681	0.730525	0.899329		-0.328271	3.30779	0.678827	0.912379		-0.828749	3.1476	0.273699	0.466972		-0.0793867	3.14706	0.942563	1
unitig12_34	48.2	36.76	69.07	9.65		-2.28041	5.62697	0.00115597	0.0174566		-0.490017	6.2034	0.46065	0.803786		0.318415	6.64866	0.630944	0.786502		1.7618	5.28647	0.0106775	0.110652
unitig12_35	10.77	4.1	5.98	8.57		-0.299336	2.80321	0.717001	0.89603		-1.458	2.43626	0.0637892	0.348782		-1.02431	2.61811	0.208992	0.39141		-1.18806	2.24705	0.143419	0.50676
unitig12_36	10.54	7.79	17.09	2.26		-2.15186	2.86007	0.00599718	0.0566549		-0.541972	3.398	0.457093	0.801368		0.495525	3.97155	0.491182	0.674411		1.58258	2.53664	0.0455573	0.276079
unitig12_37	148.85	582.4	485.44	168.8		0.220795	5.93054	0.745862	0.906854		1.87216	7.10208	0.00596515	0.0979211		1.50622	6.87529	0.0255353	0.0956603		1.62256	7.12254	0.0162157	0.147622
unitig12_38	42.17	86.05	122.96	14.34		-1.51984	6.06742	0.0249454	0.141279		0.932777	7.24625	0.160527	0.531016		1.34504	7.58093	0.044534	0.140977		2.4239	6.85164	0.000492742	0.0128128
unitig12_39	18.99	34.82	58.22	17.58		-0.0727203	3.08929	0.965301	1		0.784302	3.63586	0.281411	0.674324		1.41922	4.11692	0.0474787	0.146967		0.828445	3.57123	0.246055	0.639035
unitig12_40	181.74	130.12	88.65	78.06		-1.18125	6.48374	0.0782172	0.282256		-0.579126	6.76331	0.381337	0.750422		-1.23655	6.58355	0.0652292	0.180321		0.573333	6.15694	0.389369	0.758345
unitig12_41	93.15	47.97	92.19	38.24		-1.24465	6.36126	0.0641541	0.251588		-1.05198	6.48742	0.116094	0.45417		-0.214342	6.86952	0.746045	0.86637		0.163871	5.76083	0.811286	0.973245
unitig12_42	14.46	31.65	98.02	21.25		0.582146	2.76446	0.477755	0.746245		1.03881	3.11849	0.166884	0.538922		2.55822	4.31789	0.000686227	0.00773168		0.427904	3.27792	0.572659	0.868697
unitig12_43	26.84	85.06	205.46	74.31		1.50582	6.71336	0.0259953	0.14546		1.56611	6.82555	0.0207666	0.191625		2.73603	7.82621	9.73e-05	0.00226777		0.0314399	7.35113	0.963438	1
unitig12_44	18.52	23.37	47.5	31.27		0.783119	3.75744	0.267116	0.556272		0.223744	3.49687	0.789754	0.95804		1.14326	4.11403	0.111452	0.258704		-0.588347	3.87294	0.409224	0.769542
unitig12_45	185.98	204.66	167.91	304.21		0.747659	9.73717	0.255756	0.543452		0.0419692	9.40343	0.949322	1		-0.346243	9.27076	0.597522	0.758184		-0.734533	9.80418	0.263952	0.65681
unitig12_46	35.42	20.33	28.69	12.12		-1.51465	4.03682	0.0326473	0.168006		-0.885576	4.29533	0.207346	0.588618		-0.49552	4.49818	0.470579	0.656212		0.60056	3.51083	0.406536	0.768213
unitig12_47	23.97	19.78	14.67	12.59		-0.887518	5.24686	0.193036	0.46367		-0.373041	5.51639	0.582255	0.866889		-0.905034	5.35584	0.17975	0.355478		0.485722	5.06751	0.475819	0.813123
unitig12_48	22.38	29.44	86.85	187.9		3.10893	7.22225	1.42e-05	0.000602927		0.300415	5.18846	0.655524	0.904744		1.75858	6.21258	0.0101009	0.0502319		-2.83747	7.30988	5.76e-05	0.00238339
unitig12_49	100.09	140.13	118.32	154.66		0.666273	7.22147	0.313667	0.602161		0.389922	7.12522	0.555673	0.852421		0.044045	6.99027	0.948064	0.993014		-0.305197	7.43235	0.643529	0.90175
unitig12_50	0.72	2.05	2.31	0.79		-0.000739028	-0.0547165	1	1		1.16693	0.544332	0.497906	0.828765		1.23403	0.63119	0.390133	0.584251		1.1426	0.438022	0.305221	0.696276
unitig12_51	43.5	38.25	43.3	30.67		-0.468253	5.88807	0.486485	0.75266		-0.280018	6.03665	0.67827	0.912379		-0.206908	6.12141	0.76038	0.875298		0.159423	5.78087	0.813821	0.973572
unitig12_52	10.71	11.41	9.42	9.71		-0.0937128	3.70044	0.907871	0.985539		-0.00398103	3.8098	1	1		-0.383874	3.67858	0.614778	0.77328		0.0609591	3.74144	0.941876	1
unitig12_53	25.68	37.5	51.14	16.6		-0.591992	6.34809	0.373736	0.662551		0.450722	6.92473	0.495667	0.828765		0.796247	7.18577	0.230715	0.416538		1.01392	6.67928	0.128625	0.477596
unitig12_54	4.37	3.31	2.06	2.59		-0.723365	3.2638	0.333593	0.622464		-0.492345	3.41902	0.50845	0.835519		-1.27279	3.17878	0.0913856	0.226859		0.202412	3.03949	0.816978	0.973736
unitig12_55	19.82	56.43	119.69	50.76		1.39295	6.39737	0.0389018	0.18699		1.4127	6.4792	0.0362818	0.258841		2.39407	7.30079	0.000556886	0.00667319		-0.00910567	6.98361	0.991595	1
unitig14_1	447.89	1006.78	592.7	336.61		-0.374295	8.74221	0.568636	0.808716		1.07256	9.61805	0.104994	0.434468		0.205519	9.14205	0.754123	0.871659		1.41803	9.4819	0.0334409	0.23255
unitig14_2	16.73	28.57	15.35	13.28		-0.294969	5.00856	0.667388	0.868183		0.677728	5.59507	0.317004	0.705251		-0.318333	5.11423	0.635846	0.788821		0.943943	5.46189	0.160173	0.528734
unitig14_3	0	7.23	8.11	3.16		6.81985	0.760542	0.00199604	0.0261652		7.92969	1.70062	2.25e-05	0.00296978		8.05304	1.83095	1.17e-05	0.000500411		1.00839	2.0685	0.23162	0.624108
unitig14_4	304.72	239.98	273.9	280.7		-0.0803041	7.12171	0.906581	0.985539		-0.439551	7.02437	0.506001	0.834414		-0.351658	7.11367	0.595011	0.756355		-0.388089	6.96219	0.556456	0.857807
unitig14_5	230.4	1282.25	1682.51	2136.35		3.24897	8.43641	5.58e-06	0.000276165		2.37883	7.74469	0.000579432	0.028678		2.66775	8.04175	0.000135343	0.00282821		-0.899011	8.97161	0.173007	0.548256
unitig14_6	18.93	19.02	9.71	16.57		-0.154443	5.75592	0.818678	0.943984		-0.0907999	5.85285	0.898488	0.999413		-1.16423	5.47536	0.0854276	0.217438		0.0348189	5.75606	0.960802	1
unitig14_7	179.31	130.72	61.31	80.08		-1.12417	6.0898	0.0943415	0.31195		-0.552519	6.36243	0.406966	0.76117		-1.74509	6.03539	0.0108602	0.0527105		0.542871	5.7851	0.419623	0.778027
unitig14_8	0.16	0.36	0.12	0.47		1.53447	0.275689	0.266667	0.555647		1.00544	0.0505251	0.769726	0.950521		-0.577823	-0.506751	1	1		-0.561049	0.448788	0.840166	0.981123
unitig14_9	4.13	5.34	4.53	4.43		0.111107	2.92364	0.922212	0.99169		0.251344	3.06302	0.755763	0.949223		-0.085868	2.93671	0.961491	1		0.111491	3.08036	0.910273	1
unitig14_10	198.85	115.16	123.98	105.07		-0.881134	6.98945	0.185044	0.455128		-0.882954	7.05509	0.184511	0.560899		-0.880206	7.10713	0.185691	0.363499		-0.0306463	6.53216	0.965545	1
unitig14_11	0.7	0.77	4.19	0.66		-0.0672095	1.34557	1	1		-0.00255415	1.43288	1	1		2.35974	3.0364	0.00357069	0.0241419		0.0361601	1.36221	1	1
unitig14_12	94.74	49.13	55.41	42.63		-1.11432	5.81159	0.098964	0.320959		-1.04363	5.89989	0.120745	0.46547		-0.968998	5.97563	0.150679	0.314945		0.0418949	5.23989	0.958141	1
unitig14_13	30.66	41.71	39.71	18.8		-0.673361	4.35915	0.330292	0.619343		0.346039	4.91008	0.615278	0.885221		0.170006	4.86474	0.809972	0.906929		0.99074	4.62771	0.151388	0.515387
unitig14_14	4.28	5.68	5	7.07		0.747934	4.12357	0.296795	0.583988		0.296633	3.9247	0.688653	0.917366		0.0173665	3.82637	1	1		-0.480224	4.27485	0.486456	0.821779
unitig14_15	8.96	12.8	11.5	30.38		1.8223	3.22919	0.0171646	0.113292		0.454767	2.38652	0.580886	0.866269		0.182204	2.28524	0.883327	0.952197		-1.39701	3.3462	0.0564254	0.309942
unitig14_16	6.89	5.71	7.54	5.46		-0.287416	3.37109	0.718229	0.89603		-0.343107	3.40879	0.646728	0.902665		-0.0643585	3.591	0.949924	0.994589		-0.0844559	3.24261	0.946086	1
unitig14_17	2.8	0.57	2.37	2.15		-0.344372	2.92826	0.663121	0.865496		-2.38999	2.37023	0.00507411	0.0903085		-0.442168	2.99446	0.573297	0.738593		-2.07595	2.13528	0.012425	0.123334
unitig14_18	775.59	682.9	447.43	1693.86		1.16478	9.52169	0.0789197	0.28341		-0.279339	8.75865	0.670476	0.90926		-0.99195	8.53003	0.133782	0.292602		-1.47296	9.49532	0.0273751	0.205543
unitig14_19	21.97	25.22	45.75	8.99		-1.24124	4.44786	0.0726921	0.271802		0.101804	5.06263	0.889878	0.998589		0.860516	5.557	0.204925	0.386353		1.31447	4.57279	0.0583521	0.315466
unitig14_20	262.64	183.03	84.84	73.72		-1.79503	9.59742	0.00773241	0.0685393		-0.617043	10.0234	0.347314	0.728196		-1.82943	9.70783	0.00668892	0.0369699		1.14916	9.1864	0.0829389	0.383909
unitig14_21	215.06	639.1	777.95	1098.3		2.38967	9.53663	0.000515066	0.00942615		1.47463	8.8806	0.0274007	0.223596		1.65571	9.0673	0.01371	0.0617713		-0.943887	9.95008	0.152452	0.516909
unitig14_22	20.9	14.75	11.68	5.44		-1.89508	4.3983	0.00784384	0.0689394		-0.597129	4.85871	0.385254	0.751947		-1.03344	4.74685	0.136032	0.296393		1.26952	4.01697	0.070292	0.352792
unitig14_23	11.01	21.99	27.07	8.14		-0.398351	3.95987	0.574641	0.812202		0.892157	4.72816	0.196385	0.573485		1.09009	4.91132	0.116663	0.266929		1.26189	4.5693	0.0687059	0.347921
unitig14_24	5.53	2.21	6.72	5.08		-0.0891457	3.68054	0.906651	0.985539		-1.42901	3.2274	0.0554158	0.325337		0.0816487	3.88214	0.937768	0.986418		-1.36908	3.17086	0.0640868	0.332272
unitig14_25	24.11	33.36	47.55	16.72		-0.484339	4.73045	0.486927	0.753058		0.377557	5.22223	0.581095	0.866269		0.78312	5.51711	0.246733	0.435647		0.833169	5.007	0.22044	0.609283
unitig14_26	9.64	7.95	8.34	4.35		-1.10428	4.50032	0.110227	0.343647		-0.370799	4.84452	0.592	0.871911		-0.407253	4.87894	0.559973	0.728049		0.704828	4.31456	0.307987	0.698188
unitig14_27	100.2	104.8	69.35	74.99		-0.38146	6.37465	0.566898	0.807558		-0.0314037	6.60424	0.964897	1		-0.731271	6.34929	0.273236	0.466613		0.321239	6.40384	0.627823	0.894163
unitig14_28	0.33	0.61	1.37	0.61		0.87151	-0.0628363	0.726708	0.896403		0.749351	-0.0709553	0.726708	0.931553		1.79617	0.541844	0.251568	0.441063		-0.152378	0.0832863	1	1
unitig14_29	90.71	67.3	22.04	29.69		-1.57291	6.57117	0.0202456	0.124718		-0.526565	6.98173	0.426344	0.776056		-2.24177	6.54446	0.00118695	0.0112389		1.01757	6.24443	0.1275	0.475813
unitig14_30	173.02	105.69	49.78	76.47		-1.14038	8.61741	0.0856011	0.295894		-0.807012	8.79682	0.220882	0.605996		-1.99588	8.51779	0.00330651	0.0229187		0.304539	8.16112	0.643148	0.90175
unitig14_31	2.91	5.83	11.84	2.46		-0.23342	1.66285	0.913871	0.988087		0.90297	2.34267	0.271493	0.66571		1.8128	3.02809	0.0214115	0.0844909		1.10853	2.21334	0.171981	0.546638
unitig14_32	57.88	161.92	199.58	89.44		0.663835	6.26711	0.319354	0.608335		1.38646	6.81764	0.0390366	0.269258		1.58469	7.01499	0.0189282	0.0776899		0.693798	7.00719	0.294241	0.685871
unitig14_33	19.86	22.34	16.65	10.47		-0.877506	4.02791	0.213024	0.489808		0.0697628	4.50652	0.932776	1		-0.452393	4.30903	0.520058	0.698018		0.91868	4.12556	0.186287	0.565102
unitig14_34	24.37	14.36	17	9.19		-1.37245	5.25113	0.0448726	0.204527		-0.860596	5.47993	0.203799	0.584237		-0.719116	5.58306	0.286062	0.47954		0.483133	4.74348	0.481416	0.81701
unitig14_35	2.19	2.53	4.27	2.81		0.375529	3.32499	0.600817	0.825516		0.0990643	3.24037	0.937453	1		0.741924	3.6611	0.31064	0.505266		-0.305364	3.40033	0.692884	0.926724
unitig14_36	21.58	10.17	2.69	6.12		-1.78705	5.2589	0.0100717	0.0803918		-1.18325	5.48519	0.0815555	0.391522		-3.20427	5.14645	1.44e-05	0.000581774		0.57512	4.50027	0.403144	0.765615
unitig14_37	6.04	7.35	7.12	6.4		0.117312	3.08011	0.896145	0.980829		0.162711	3.16871	0.868265	0.990286		0.0212884	3.14463	1	1		0.0166176	3.19369	1	1
unitig14_38	118.07	54.84	106.93	51.3		-1.16618	6.77765	0.0815013	0.28888		-1.20165	6.83278	0.0725444	0.369219		-0.342852	7.20353	0.602511	0.76319		-0.0642837	6.11444	0.92358	1
unitig14_39	47.27	21.2	20.8	24.03		-0.93908	6.98703	0.15836	0.418941		-1.25355	6.95241	0.061022	0.34119		-1.38288	6.96603	0.0392769	0.128758		-0.343306	6.3461	0.605446	0.88352
unitig14_40	21.01	18.39	15.83	7.78		-1.39786	4.62417	0.0444795	0.203393		-0.285465	5.09501	0.675989	0.911689		-0.604678	5.00826	0.373339	0.567433		1.0838	4.47989	0.117504	0.460904
unitig14_41	4.92	2.1	1.97	3.06		-0.661364	2.72461	0.411671	0.699352		-1.32581	2.54982	0.0915427	0.406561		-1.53225	2.53326	0.0546249	0.160581		-0.693458	2.14343	0.405182	0.767447
unitig14_42	64.74	55.79	93.61	34.1		-0.886337	6.83089	0.182615	0.45279		-0.311032	7.12714	0.638308	0.898596		0.332639	7.50221	0.613748	0.773079		0.546494	6.68419	0.410091	0.769787
unitig14_43	36.07	33.53	41.16	29.94		-0.228784	5.16599	0.73922	0.905026		-0.196754	5.2468	0.775908	0.951621		-0.00305248	5.3921	1	1		0.0032146	5.11112	1	1
unitig14_44	27.48	23.75	20.87	27.77		0.0531951	6.72058	0.938283	0.999157		-0.306471	6.61471	0.644374	0.901724		-0.596188	6.54264	0.370765	0.564937		-0.388511	6.62736	0.558578	0.858799
unitig14_45	2.21	0.71	0.83	0.81		-1.40419	1.7379	0.109695	0.342745		-1.66607	1.71307	0.0668461	0.356991		-1.60015	1.76926	0.0817032	0.211849		-0.290227	0.921572	0.763627	0.95261
unitig14_46	41.78	20	35.16	9.19		-2.14239	5.36236	0.00219793	0.0277977		-1.15868	5.67006	0.0864151	0.396981		-0.447204	5.98358	0.500971	0.682228		0.955093	4.56188	0.167246	0.539315
unitig14_47	1569.31	571.69	716.21	300.44		-2.34735	10.8746	0.000625561	0.0109506		-1.55293	11.1058	0.0201941	0.188906		-1.33061	11.217	0.0453042	0.14262		0.765588	9.76442	0.244525	0.637599
unitig14_48	2.57	5.56	11.86	0.89		-1.51246	2.02889	0.0770135	0.280064		1.02188	3.26244	0.171798	0.544918		2.01008	4.03164	0.00634793	0.0356934		2.50764	2.88262	0.00185236	0.0333078
unitig14_49	21.57	31.56	35.92	23.88		0.177768	5.1818	0.799128	0.932887		0.447846	5.39849	0.506038	0.834414		0.531792	5.49907	0.431095	0.62148		0.241261	5.45151	0.721783	0.936091
unitig14_50	12.57	17.96	27.11	9.69		-0.329264	3.2166	0.662457	0.865128		0.42634	3.66837	0.5506	0.849256		0.920294	4.02342	0.197981	0.378475		0.727041	3.50837	0.314466	0.703154
unitig14_51	4.49	6.38	7.39	7.76		0.854341	2.87494	0.281613	0.570719		0.424921	2.68398	0.606222	0.881289		0.554658	2.81048	0.48859	0.672375		-0.458475	3.05207	0.535383	0.847365
unitig14_52	0	0.81	2.68	0		NA	NA	NA	unitig14_52		-0.945957	0.52381	0.835519	unitig14_52		-0.218882	0.0942029	0.230654	unitig14_52		-1.1431	0.52381	0.841204
unitig14_53	1.09	5.27	7.71	1.03		-0.0913474	0.187412	1	1		2.12926	1.50569	0.034945	0.256289		2.60507	1.92074	0.00666491	0.0369003		2.1959	1.38431	0.019615	0.16706
unitig14_54	9.82	10.62	23.83	7.35		-0.380038	3.89974	0.611993	0.833589		0.0118068	4.15013	1	1		1.07376	4.83209	0.123122	0.276757		0.363138	3.95366	0.613869	0.886884
unitig14_55	1192.62	615.35	426.16	277.75		-2.0639	8.84628	0.00242084	0.0297683		-1.051	9.17216	0.112145	0.446152		-1.6832	9.04605	0.0122612	0.0570931		0.984071	8.11153	0.137072	0.49445
unitig14_56	5.71	4.4	3.39	5.02		-0.158101	4.10239	0.842194	0.954458		-0.477633	4.02234	0.497115	0.828765		-0.946271	3.88792	0.19126	0.369596		-0.34838	3.91946	0.620431	0.891026
unitig14_57	11.96	5.2	3.55	13.31		0.215928	3.20312	0.777582	0.921986		-1.27489	2.63652	0.111199	0.445747		-1.92529	2.50484	0.0201164	0.0809733		-1.52027	2.79256	0.051164	0.294845
unitig14_58	12.15	4.17	3.74	5.42		-1.11624	4.20146	0.112926	0.348162		-1.63845	4.11287	0.0218428	0.197592		-1.89707	4.09888	0.00859279	0.0447247		-0.551054	3.37376	0.454224	0.798518
unitig14_59	5.71	4.79	5.46	13.66		1.28274	4.11848	0.0739056	0.272807		-0.372321	3.2309	0.636814	0.898309		-0.266993	3.3281	0.734964	0.858569		-1.68428	4.05123	0.0176539	0.156213
unitig14_60	10.53	19.05	35.11	58.48		2.51346	7.49989	0.000303343	0.00633275		0.762002	6.2551	0.254468	0.647448		1.54088	6.8422	0.0227028	0.08795		-1.78035	7.69408	0.00849491	0.0970504
unitig14_61	76.93	131.48	103.78	158.7		1.08213	6.57141	0.105344	0.334591		0.676978	6.37649	0.311583	0.699264		0.232933	6.17071	0.726358	0.852987		-0.434011	6.87054	0.510141	0.837588
unitig14_62	96.74	87.05	74.1	79.9		-0.237696	6.84887	0.720158	0.896403		-0.248435	6.9105	0.709115	0.926915		-0.582783	6.81765	0.380316	0.574639		-0.0395723	6.76804	0.956123	1
unitig14_63	11.29	5.62	3.51	6.28		-0.796711	3.58379	0.267592	0.556853		-1.08685	3.54201	0.131376	0.482511		-1.89101	3.36357	0.0118698	0.0558533		-0.318928	3.06262	0.673545	0.918754
unitig15_1_partial	0	0	0	0		NA	NA	NA	NA		NA	NA	NA	NA		NA	NA	NA	NA
unitig15_2	5.21	9.95	15.32	2.97		-0.772282	1.67932	0.393996	0.682072		0.868209	2.5635	0.285285	0.674324		1.38176	2.95988	0.0786252	0.206072		1.61325	2.2969	0.0473359	0.282246
unitig15_3	2.72	5.14	8.65	2.17		-0.23342	1.66285	0.913871	0.988087		0.867476	2.32026	0.297457	0.685509		1.51796	2.81171	0.05613	0.163814		1.07303	2.19046	0.188387	0.56649
unitig15_4	3.51	2.04	3.04	1.94		-0.751272	1.75748	0.416921	0.704591		-0.877699	1.76268	0.307713	0.695087		-0.399472	2.00011	0.723661	0.851621		-0.154894	1.36432	0.909315	1
unitig15_5	4.32	7.73	10.97	8.14		0.951877	3.89478	0.184783	0.454963		0.741028	3.82833	0.301579	0.688484		1.14876	4.14721	0.108216	0.253831		-0.239766	4.21728	0.738584	0.941925
unitig15_6	10.41	17.57	17.25	9.89		-0.0349417	4.30171	0.969202	1		0.659233	4.75369	0.339607	0.722092		0.52913	4.72678	0.441753	0.630853		0.665431	4.71079	0.332918	0.719213
unitig15_7	2.05	15	18.3	3.43		0.760555	2.18681	0.339352	0.627029		2.7315	3.70498	0.000528542	0.0276639		2.91446	3.91387	0.000191118	0.00348678		1.94247	3.76272	0.00801398	0.0926801
unitig15_8	2.87	4.11	9.3	3.88		0.437882	2.44573	0.592573	0.821615		0.384829	2.48095	0.644988	0.901724		1.46572	3.22833	0.0524839	0.156566		-0.0819206	2.63412	0.95972	1
unitig15_9	2.1	2.8	3	5.42		1.45052	2.34244	0.084392	0.292671		0.392542	1.74849	0.7571	0.949308		0.383855	1.79264	0.7571	0.873553		-1.08768	2.44221	0.178922	0.556594
unitig15_10	15.11	23.05	80.8	17.99		0.294259	3.94505	0.675443	0.871223		0.520311	4.14075	0.471482	0.811961		2.22318	5.40343	0.00163912	0.0141662		0.197252	4.23643	0.781319	0.958237
unitig15_11	34.13	54.02	53.9	27.48		-0.268316	4.5191	0.701817	0.888252		0.571017	5.02895	0.402802	0.756498		0.461795	5.01591	0.504291	0.684874		0.810603	4.89995	0.237766	0.630055
unitig15_12	5.85	10.11	11.02	3.86		-0.561458	3.44606	0.446606	0.722413		0.691581	4.15624	0.328156	0.712971		0.716934	4.22364	0.312744	0.507424		1.22454	3.93636	0.0834605	0.383909
unitig15_13	6.84	6.04	1.33	2.67		-1.34962	1.92252	0.113191	0.34839		-0.278859	2.37571	0.783156	0.954851		-2.64206	1.72231	0.00396476	0.0258548		1.04353	1.81655	0.252505	0.645225
unitig15_14	8.08	12.53	20.39	9.32		0.238561	3.43929	0.755155	0.912902		0.530661	3.67109	0.472941	0.813642		1.13417	4.10782	0.115118	0.26475		0.263335	3.73711	0.71499	0.934036
unitig15_15	7.13	9.21	5.65	2.72		-1.33128	2.42082	0.0973092	0.317419		0.263528	3.14854	0.769335	0.950521		-0.533596	2.80879	0.528051	0.700597		1.56723	2.67679	0.042332	0.265617
unitig15_16	17.63	11.91	12.62	5.79		-1.54654	2.63716	0.0474936	0.21269		-0.643151	2.99423	0.405843	0.759492		-0.678539	3.02745	0.384798	0.579778		0.875565	2.28433	0.271034	0.665736
unitig15_17	74.82	69.49	44.04	70.14		-0.0542556	4.93637	0.949955	1		-0.203974	4.93011	0.771308	0.950597		-0.956071	4.67259	0.16755	0.338452		-0.178552	4.88311	0.79732	0.967351
unitig15_18	111.68	59.65	50.7	35.2		-1.62722	7.18693	0.0158224	0.108275		-1.0011	7.43401	0.131406	0.482511		-1.33724	7.381	0.0456763	0.143122		0.597315	6.55103	0.367867	0.7459
unitig15_19	12.59	14.89	29.77	12.72		0.0485359	4.068	0.963823	1		0.141584	4.18212	0.84964	0.982607		1.04192	4.77532	0.130628	0.28858		0.0642488	4.18058	0.942466	1
unitig15_20	190.97	124.19	76.26	44.23		-2.07366	7.15862	0.0024847	0.030202		-0.716503	7.60483	0.278235	0.673017		-1.52162	7.40004	0.0235295	0.0902053		1.32838	6.65665	0.0478626	0.283046
unitig15_21	942.9	1214.23	1223.25	1312.41		0.514785	9.87757	0.432615	0.714965		0.268871	9.80492	0.681522	0.914114		0.176801	9.8067	0.787311	0.893346		-0.274755	10.0435	0.674755	0.918754
unitig15_23_partial	0	0	0	0		NA	NA	NA	NA		NA	NA	NA	NA		NA	NA	NA	NA
unitig19_1	0	6.83	4.84	0		NA	NA	NA	unitig19_1		0.516087	0.00614931	0.0999735	unitig19_1		0.147674	0.0219002	0.0858203	unitig19_1		0.345807	0.00416566	0.0591496
unitig19_2	111.33	279.37	234.54	68.45		-0.664476	7.14126	0.314987	0.602161		1.23109	8.24615	0.0643269	0.349842		0.876356	8.05836	0.185171	0.362649		1.86676	8.04971	0.00586014	0.0763079
unitig19_3	29.89	35.57	21.08	52.32		0.832243	4.32727	0.236666	0.522456		0.142545	3.99164	0.848254	0.981616		-0.720557	3.64339	0.329322	0.52538		-0.718648	4.41584	0.297177	0.689631
unitig19_4	40.99	15.59	4.7	2.33		-4.11317	5.2462	1.35e-07	1.07e-05		-1.49403	5.67455	0.0282282	0.227061		-3.31429	5.41649	7.45e-06	0.000361004		2.59146	3.96497	0.000558357	0.0140451
unitig19_5	5.8	5.39	2.61	1.91		-1.53725	3.32911	0.0365312	0.1801		-0.189223	3.88483	0.798011	0.960613		-1.35395	3.48522	0.0599344	0.170061		1.31989	3.2621	0.074729	0.365328
unitig19_6	14.18	25.43	32.28	43.28		1.65396	4.67765	0.0181705	0.117725		0.753108	4.12482	0.28387	0.674324		0.994635	4.3325	0.153709	0.319859		-0.929848	4.93025	0.170061	0.544159
unitig19_7	79.44	111.31	115.32	106.12		0.454518	6.56766	0.496462	0.759194		0.388593	6.5968	0.560358	0.85541		0.337642	6.61944	0.612708	0.772166		-0.0947667	6.79038	0.88752	0.99423
unitig19_8	286.53	237.6	222.26	405.46		0.537503	7.30332	0.416329	0.704153		-0.368319	6.90324	0.578546	0.866269		-0.565884	6.87102	0.392169	0.586284		-0.934679	7.21513	0.159148	0.527541
unitig19_9	3.14	4.61	11.58	0.63		-2.23712	0.69178	0.0536329	0.228829		0.453261	1.67083	0.656347	0.904744		1.67321	2.51211	0.0448413	0.14153		2.67113	1.11317	0.0114318	0.116336
unitig19_10	13.63	32.15	35.51	8.41		-0.66373	5.60661	0.324175	0.612641		1.13898	6.64825	0.0895185	0.403407		1.18019	6.72828	0.0779613	0.205667		1.77396	6.44286	0.00922849	0.101729
unitig19_11	20.99	17.08	9.17	10.63		-0.938891	5.54437	0.165193	0.4287		-0.391955	5.82354	0.559388	0.85453		-1.39365	5.51705	0.0407496	0.13201		0.518169	5.34987	0.44268	0.790687
unitig19_12	9.1	18.33	45.01	8.68		-0.0335145	4.19518	0.966885	1		0.911086	4.80556	0.189249	0.564543		2.10196	5.72944	0.00265486	0.0195548		0.915882	4.76181	0.184048	0.562577
unitig19_13	175.08	123.46	82.43	153.49		-0.152221	10.2274	0.816183	0.942268		-0.600073	10.0993	0.360614	0.737707		-1.28544	9.91541	0.0530293	0.157425		-0.476692	9.99303	0.467125	0.806278
unitig19_14	0	0	0	191.17		13.6951	7.18925	4.34e-21	3.67e-17		NA	NA	NA	NA		NA	NA	unitig19_14	-13.9683		6.09e-22	2.58e-18
unitig19_15	21.15	33.44	24.93	37.84		0.877474	5.50514	0.194179	0.465225		0.564127	5.37763	0.402621	0.756498		0.0352937	5.13567	0.973434	1		-0.342215	5.7717	0.608595	0.885527
unitig19_16	17.46	57.48	35.65	19.78		0.21559	6.45987	0.74729	0.908006		1.62127	7.44175	0.0163096	0.170434		0.828955	6.93986	0.211515	0.394449		1.37686	7.46977	0.0395381	0.255935
unitig19_17	7.1	0	0	0		-8.51219	2.02398	1.45e-06	8.09e-05		-8.58615	2.05675	1.03e-06	0.000272662		-8.62809	2.08932	8.76e-07	7.43e-05		NA	NA	NA
unitig19_18	0	43.54	9.54	0		NA	NA	NA	unitig19_18		4.30458	1.73e-12	7.31e-09	unitig19_18		2.2334	1.22e-06	9.58e-05	unitig19_18		4.23886	5.04e-13	1.71e-10
unitig19_19	32.68	132.11	146.58	23.84		-0.415087	3.7182	0.566334	0.807208		1.92205	5.23365	0.00593471	0.0979211		1.96677	5.32116	0.00513906	0.0310761		2.30863	5.11753	0.0011055	0.0232539
unitig19_20	180.23	179.15	123.97	120.8		-0.540291	7.96797	0.41209	0.699555		-0.104923	8.22846	0.873792	0.992081		-0.738928	8.00802	0.26285	0.455199		0.406538	7.9531	0.536588	0.847998
unitig19_21	37.53	18.98	10.93	6.94		-2.38176	4.14617	0.00127115	0.0187241		-1.07807	4.52348	0.121809	0.468028		-1.98302	4.32893	0.00571282	0.0334455		1.27552	3.39057	0.0785687	0.375669
unitig19_22	3.45	16.85	27.13	7.56		1.16462	5.39	0.0885159	0.302141		2.18886	6.23162	0.00160913	0.0482397		2.77302	6.7755	8.96e-05	0.0021297		0.995399	6.49001	0.136121	0.492276
unitig19_23	4.8	4.68	3.88	7.84		0.73392	2.96064	0.333635	0.622464		-0.127606	2.55166	0.902795	1		-0.508048	2.42495	0.54051	0.712285		-0.890719	2.93527	0.237285	0.629376
unitig19_24	24.77	98.19	124.52	12.83		-0.916849	4.80023	0.182325	0.452264		1.888	6.48826	0.0058274	0.0971693		2.12785	6.73127	0.00206682	0.016558		2.77622	6.30264	9.01e-05	0.00339565
unitig19_25	6.66	5.21	4.86	1.75		-1.91322	2.30973	0.0226854	0.133695		-0.429296	2.84409	0.576985	0.86517		-0.650703	2.79783	0.398232	0.591344		1.45699	2.08857	0.084392	0.385191
unitig19_26	94.14	101.22	123.13	68.59		-0.41916	7.2397	0.526179	0.77802		0.00900568	7.50568	0.990824	1		0.188341	7.64991	0.775781	0.884879		0.399339	7.29121	0.544844	0.850975
unitig19_27	6.21	10.93	12.17	4.25		-0.505626	3.14013	0.528083	0.77802		0.711343	3.83868	0.317845	0.70569		0.759412	3.92044	0.290305	0.48426		1.18854	3.63524	0.100349	0.42409
unitig19_28	27.45	67.37	116.84	33.66		0.330794	5.09061	0.634108	0.849127		1.20015	5.70374	0.0780895	0.384475		1.89132	6.26747	0.00589277	0.0339635		0.840562	5.78195	0.211432	0.598433
unitig19_29	10.04	7.4	17.02	4.49		-0.988045	1.09316	0.361697	0.650809		-0.537612	1.30385	0.683327	0.914781		0.604957	1.91929	0.508053	0.686781		0.423366	0.856552	0.745855	0.945937
unitig19_30	3.35	5.34	16.72	1.4		-1.11622	0.0833835	0.585507	0.816474		0.584609	0.786867	0.700311	0.922449		2.17197	1.86774	0.0275183	0.100719		1.67969	0.435336	0.189984	0.56649
unitig19_31	50.46	73.28	329.86	17.15		-1.51008	5.11363	0.0286949	0.154335		0.44511	5.99124	0.506981	0.835481		2.51181	7.54483	0.000309321	0.00464957		1.92657	5.50257	0.00548216	0.0726129
unitig19_32	131.58	35.06	33.54	62.03		-1.04789	6.27546	0.11836	0.357053		-2.00525	6.0899	0.00365764	0.0761617		-2.17212	6.10786	0.00171028	0.0145537		-0.986237	5.31587	0.144579	0.508117
unitig19_33	24.31	18.67	39.57	13.78		-0.777555	4.46365	0.263371	0.552698		-0.479981	4.64672	0.490233	0.824926		0.499328	5.19372	0.463909	0.650653		0.268846	4.2348	0.702432	0.929086
unitig19_34	55.45	56.46	18.62	25.68		-1.0726	6.33089	0.109047	0.342093		-0.0697428	6.80342	0.919402	1		-1.76985	6.25486	0.00956344	0.0483241		0.974071	6.33048	0.144991	0.508117
unitig19_35	0	0.76	2.33	0.76		3.90658	-0.936891	0.52381	0.776031		3.857	-0.945957	0.52381	0.835519		5.34653	-0.218882	0.0942029	0.230654		-0.147005	-0.724499	1	1
unitig19_36	8.92	4.37	2.72	26.94		1.63247	5.51876	0.0177779	0.115982		-1.1265	4.08626	0.107908	0.439807		-1.9052	3.92174	0.00856846	0.0446416		-2.78813	5.36091	0.00010452	0.00380263
unitig19_37	2.27	6.76	7.47	575.81		8.01293	8.54873	2.91e-18	4.92e-15		1.47569	2.6358	0.062273	0.345444		1.50343	2.70919	0.0643524	0.178595		-6.56703	8.61802	6.46e-15	3.22e-12
unitig19_38	989.86	696.01	513.38	1316.43		0.449045	11.7292	0.492916	0.757196		-0.604278	11.2834	0.356961	0.734068		-1.14604	11.1433	0.0833825	0.214325		-1.08216	11.5568	0.101561	0.426443
unitig19_39	24.17	22.07	9.4	35.31		0.58365	4.61081	0.401972	0.690085		-0.227104	4.24434	0.762815	0.950521		-1.55032	3.80999	0.0305885	0.108765		-0.839691	4.56612	0.224771	0.615485
unitig19_40	141.63	56.41	41.52	104.85		-0.397895	5.86578	0.553218	0.796691		-1.42656	5.56898	0.0371122	0.261021		-1.97019	5.48774	0.00444661	0.0279652		-1.05755	5.28362	0.119585	0.46501
unitig19_41	8.24	9.4	16.49	12.77		0.668425	5.31725	0.321753	0.610353		0.0956031	5.0594	0.898744	0.999413		0.803675	5.52061	0.236799	0.423557		-0.601704	5.39862	0.371243	0.7459
unitig19_42	0.13	2.05	0.38	0.19		0.536956	-0.709314	1	1		3.78619	1.16591	0.00753089	0.11284		1.30419	-0.354251	0.658385	0.804862		3.229	1.06105	0.00455058	0.0637607
unitig19_43	166.16	1047.27	1114.11	1069.94		2.72582	8.30295	9.75e-05	0.00264289		2.56089	8.22831	0.000228491	0.0159641		2.54753	8.26848	0.000247486	0.00407704		-0.193789	9.06622	0.767626	0.95455
unitig19_44	18.69	11.73	11.5	33.72		0.89214	4.70945	0.197148	0.469017		-0.772577	3.9194	0.277989	0.672615		-0.901472	3.92031	0.20198	0.382927		-1.6938	4.52598	0.0157049	0.145041
unitig19_45	16.59	19.77	24.35	20.33		0.33139	2.6216	0.721106	0.896403		0.169898	2.59859	0.856588	0.986056		0.385292	2.76735	0.624286	0.780312		-0.190376	2.72147	0.848435	0.983748
unitig19_46	18.71	14.01	10.22	14.65		-0.314277	6.04632	0.642597	0.854491		-0.510999	6.02755	0.44326	0.788411		-1.07035	5.87083	0.1125	0.260424		-0.225556	5.8355	0.740084	0.943129
unitig19_47	5.05	2.93	0	0		-7.13999	0.794627	0.000726851	0.0122665		-0.857112	1.46364	0.394949	0.752977		-7.2554	0.831208	0.000530405	0.00647585		6.52474	0.25936	0.00614931	0.0788625
unitig19_48	18.91	24.01	25.12	18.2		-0.0249531	3.24198	1	1		0.249884	3.45054	0.730928	0.934553		0.216262	3.48279	0.786598	0.893014		0.246122	3.40969	0.738386	0.941879
unitig19_49	9.04	15.01	15.29	11.95		0.428109	3.60282	0.575816	0.812673		0.622454	3.78422	0.386681	0.752405		0.552352	3.79355	0.451945	0.63937		0.165535	3.92971	0.830759	0.979736
unitig19_50	1.78	0.62	1.54	5.33		1.54184	2.29191	0.0734022	0.272319		-1.65178	0.841349	0.146765	0.51186		-0.482682	1.26036	0.683327	0.823486		-3.22696	2.01001	0.000755559	0.017693
unitig19_51	33.39	43.68	80.55	19.34		-0.747864	5.06501	0.273339	0.562034		0.292091	5.61366	0.6625	0.907038		1.07139	6.14503	0.111515	0.258779		1.01123	5.30101	0.134952	0.490349
unitig19_52	4.89	10.21	21	5.71		0.250896	2.99764	0.745803	0.906854		0.952269	3.48411	0.188974	0.564543		1.88108	4.20073	0.0100265	0.050004		0.672715	3.52824	0.349942	0.731458
unitig19_53	27.65	77.3	94.77	37.72		0.483909	4.9793	0.483874	0.750719		1.38334	5.6345	0.043328	0.285499		1.57462	5.8265	0.0216094	0.0851132		0.870627	5.75365	0.19316	0.571218
unitig19_54	5.81	6.53	5.13	5.31		-0.0935052	2.55587	0.950626	1		0.0754964	2.70314	0.955638	1		-0.374822	2.53326	0.663922	0.809093		0.140347	2.63028	0.879539	0.993094
unitig19_55	18.29	4.28	0.98	15.63		-0.184294	4.48578	0.798569	0.932792		-2.17469	3.90918	0.00300924	0.0685717		-4.43309	3.71414	3.21e-07	3.54e-05		-2.01968	3.7731	0.0058346	0.0763079
unitig19_56	0	0.74	1.6	1.73		5.64353	-0.0789967	0.0565217	0.23632		4.40839	-0.728015	0.285714	0.674324		5.34653	-0.218882	0.0942029	0.230654		-1.34073	0.0890767	0.442579	0.790687
unitig19_57	32.14	100.34	252.05	74.63		1.26227	4.89295	0.0671521	0.259256		1.55524	5.1725	0.0247723	0.211933		2.77913	6.2133	0.000101501	0.00229714		0.264101	5.57457	0.69631	0.927859
unitig19_58	47.18	112.64	154.13	111.86		1.28474	6.13787	0.0572191	0.237259		1.15967	6.11814	0.0860425	0.395822		1.50943	6.41953	0.0262404	0.0975563		-0.153926	6.62236	0.818132	0.97406
unitig19_59	62	25.57	17.62	66.34		0.13719	5.80539	0.84079	0.954261		-1.36923	5.26712	0.0463326	0.295925		-2.0138	5.15978	0.00407733	0.0263058		-1.53536	5.36063	0.0246779	0.19112
unitig19_60	5.99	10.35	22.08	17.49		1.60372	2.55672	0.0473359	0.212208		0.706246	2.03303	0.432544	0.780075		1.70098	2.75358	0.0397471	0.129934		-0.927004	2.75076	0.215077	0.602368
unitig19_61	1.58	4.11	8.05	3.26		1.07325	1.21682	0.302645	0.590465		1.2501	1.39458	0.177284	0.551827		2.10547	2.04777	0.0232942	0.0896678		0.147695	1.66561	0.925108	1
unitig19_62	2.78	1.62	4.93	0.89		-1.70246	0.684553	0.143889	0.398487		-0.853187	0.961532	0.514813	0.835519		0.644535	1.70864	0.524474	0.699409		0.825356	0.27048	0.497906	0.828572
unitig19_63	2.57	1.94	3.71	0.74		-1.7655	0.980883	0.0910982	0.307602		-0.432281	1.44825	0.717697	0.930515		0.327817	1.86501	0.767877	0.879154		1.30904	0.788837	0.228158	0.620498
unitig19_64	1.88	5.58	5.15	1.51		-0.262089	1.88691	0.77773	0.921986		1.49114	2.98407	0.0532012	0.31853		1.27814	2.88762	0.113334	0.261854		1.7254	2.86204	0.0244588	0.190743
unitig19_65	1.03	0	0	0		-7.40131	1.01478	0.000290613	0.00608202		-7.47504	1.03248	0.00021796	0.0154843		-7.51686	1.05631	0.000164799	0.00324398		NA	NA	NA
unitig19_66_partial	10.75	1.38	0.68	7.38		-0.504423	4.1448	0.475864	0.744253		-3.00671	3.58075	0.000107011	0.0088693		-4.23164	3.52169	1e-06	8.15e-05		-2.53214	3.17397	0.0011694	0.0242372
unitig20_1	7.51	6.42	7.14	3.27		-1.14422	3.55709	0.109288	0.342392		-0.320286	3.93702	0.655642	0.904744		-0.269043	4.01045	0.720896	0.849502		0.795485	3.40915	0.281411	0.676159
unitig20_2	3.93	5.51	24.99	1.12		-1.66479	1.78424	0.0572326	0.237259		0.424921	2.68398	0.606222	0.881289		2.49028	4.20494	0.000835449	0.00883785		2.06356	2.17959	0.0160393	0.147263
unitig20_3	184.36	323.2	747.72	96.66		-0.896026	5.2851	0.186533	0.455876		0.712826	6.13444	0.285302	0.674324		1.81939	6.96382	0.00754379	0.0406359		1.58014	5.82949	0.0203815	0.170392
unitig20_4	6.55	11.03	32.83	8.43		0.410151	4.1901	0.571789	0.810881		0.661943	4.40613	0.350144	0.73022		2.13362	5.51198	0.00233637	0.0179058		0.222979	4.54603	0.745858	0.945937
unitig20_5	63.95	29.61	12.96	22.72		-1.45012	4.84479	0.036056	0.178381		-1.19933	4.98144	0.0793445	0.385555		-2.50823	4.7328	0.000524242	0.0064459		0.222085	4.14049	0.767034	0.954374
unitig20_6	2.64	2.15	6.94	5.19		1.07162	1.97543	0.232558	0.516897		-0.299061	1.29583	0.89207	0.998589		1.24166	2.20936	0.145296	0.309488		-1.40088	1.8782	0.0898965	0.399189
unitig20_7	18.44	16.89	20.62	10.14		-0.819387	3.93309	0.247517	0.53358		-0.227104	4.24434	0.762815	0.950521		-0.0386368	4.38614	0.970492	1		0.563657	3.848	0.425951	0.783224
unitig20_8	3.2	3.39	3.24	3.55		0.18338	3.88497	0.798011	0.932575		-0.00257383	3.85383	1	1		-0.181743	3.81566	0.80801	0.906929		-0.214803	3.92376	0.764643	0.953078
unitig20_9	9.78	6.28	2.75	8.93		-0.0934439	2.34751	0.944323	1		-0.731745	2.12823	0.373174	0.742308		-2.01031	1.78532	0.0275183	0.100719		-0.667408	2.06618	0.42351	0.781134
unitig20_10	193.18	452.77	421.38	658.26		1.80707	8.16939	0.00752748	0.0670955		1.13335	7.74261	0.0887036	0.40228		0.926944	7.65561	0.161843	0.331008		-0.70257	8.55818	0.285886	0.676363
unitig20_11	13.57	33.13	34	34.68		1.38591	5.07846	0.0442303	0.202868		1.18809	5.00735	0.0844484	0.395034		1.12274	5.01445	0.103609	0.246294		-0.22671	5.55	0.739	0.942172
unitig20_12	9.08	2.75	1.6	4.2		-1.07951	3.81192	0.131225	0.376757		-1.81476	3.66578	0.0128886	0.150832		-2.66917	3.55036	0.000482035	0.00607667		-0.764181	2.93304	0.313448	0.702379
unitig20_13	0.52	0	0.66	0.42		-0.149393	0.394904	1	1		-5.64797	-0.318545	0.0565217	0.328743		0.063473	0.573904	1	1		-5.69332	-0.393028	0.0565217	0.309942
unitig20_14	96.32	90.43	65.07	53.43		-0.811256	7.14936	0.221533	0.502287		-0.186368	7.47578	0.778236	0.952375		-0.764537	7.28408	0.247945	0.437501		0.596071	7.0799	0.367019	0.744846
unitig20_15	123.36	31.44	19.55	369.73		1.62162	8.61356	0.015746	0.108238		-2.0689	6.95826	0.00257091	0.0622764		-2.85805	6.88562	5.6e-05	0.00160354		-3.71943	8.37411	3.61e-07	2.78e-05
unitig20_16	2.63	2.69	1.82	2.13		-0.298843	2.25219	0.708588	0.892331		-0.0833508	2.41369	0.946047	1		-0.734951	2.17177	0.427663	0.618952		0.186974	2.24954	0.843823	0.981844
unitig20_17	30.54	47.06	66.86	41.63		0.481486	4.5655	0.493962	0.757431		0.523153	4.65695	0.451972	0.797364		0.929802	4.96204	0.177343	0.351948		0.0128271	4.84469	0.990868	1
unitig20_18	3.02	2.74	5.35	0		-5.26095	-0.494328	0.161491	0.422726		-0.2153	0.182485	1	1		0.545377	0.563183	0.822492	0.913743		5.28347	-0.562447	0.0942029	0.408052
unitig20_19	17.74	57.46	47.47	19.82		0.197045	5.08432	0.776795	0.921986		1.59757	6.05741	0.0190535	0.185984		1.21882	5.83534	0.0727106	0.196083		1.37175	6.07712	0.0419673	0.26404
unitig20_20	101.28	51.83	69.5	36.34		-1.43884	6.43972	0.0331104	0.169872		-1.06079	6.61838	0.11186	0.446152		-0.742137	6.78132	0.263007	0.455377		0.349254	5.80159	0.603275	0.882326
unitig20_21	5.97	4.09	6.37	2.18		-1.30742	1.27278	0.21179	0.488701		-0.637237	1.5469	0.479616	0.816178		-0.12707	1.8158	0.92171	0.976863		0.643519	0.969899	0.545915	0.850975
unitig20_22	11.05	14.36	32.66	11.5		0.104872	3.9062	0.899976	0.981704		0.290456	4.0718	0.682477	0.914727		1.36959	4.81145	0.0498613	0.151313		0.156797	4.0918	0.833891	0.979935
unitig20_23	9.81	16.48	18.92	10.38		0.110039	3.45738	0.918577	0.990129		0.64483	3.82604	0.374256	0.742308		0.741626	3.93752	0.296001	0.491443		0.506081	3.83412	0.476917	0.814248
unitig20_24	8.19	9.06	8.26	3.49		-1.20165	3.50223	0.0984877	0.319905		0.0417612	4.07538	0.982	1		-0.188612	4.01159	0.793482	0.897228		1.21507	3.59109	0.0955034	0.412211
unitig20_25	120.91	150.44	158.39	203.2		0.787159	7.41683	0.234544	0.519128		0.219023	7.1507	0.741506	0.940795		0.191257	7.18714	0.773845	0.883026		-0.596987	7.55003	0.365385	0.744022
unitig20_26	7.42	7.82	4.57	3.67		-0.972456	3.66759	0.173915	0.442332		-0.0249835	4.13154	0.982707	1		-0.907286	3.80026	0.202305	0.383138		0.918977	3.70746	0.195348	0.574588
unitig20_27	3.28	6.79	1.38	2.05		-0.405731	0.298706	0.7999	0.932887		1.02694	1.03695	0.324544	0.710986		-1.30764	0.0945571	0.372947	0.567433		1.40768	0.849239	0.183672	0.56188
unitig20_28	1.46	2.02	1.85	1.89		0.382581	0.387357	1	1		0.447108	0.470054	0.822492	0.970337		0.1896	0.390952	1	1		0.0358634	0.522827	1	1
unitig20_29	9.01	11.73	16.89	3.86		-1.16066	2.51054	0.143002	0.397724		0.269093	3.18946	0.744483	0.941209		0.699257	3.49217	0.338088	0.532357		1.40194	2.76002	0.0633408	0.331036
unitig20_30	11.79	13.77	14.2	18.54		0.680144	3.56977	0.353741	0.642205		0.117784	3.31635	0.910273	1		0.0687333	3.34081	0.940623	0.988143		-0.591343	3.64519	0.403527	0.765615
unitig20_31	2.3	11.73	31.45	10.43		2.22745	2.67592	0.00782773	0.0689394		2.25266	2.76979	0.00822166	0.118007		3.57526	3.9345	1.29e-05	0.000532708		-0.00417251	3.37327	1	1
unitig20_32	57.05	35.95	36.87	18.23		-1.60945	7.24905	0.0170516	0.112999		-0.762234	7.57612	0.249467	0.642006		-0.829459	7.60262	0.210255	0.392996		0.81842	6.76318	0.217561	0.604504
unitig20_33	13.84	38.22	65.67	16.34		0.278842	4.99184	0.689761	0.87976		1.37069	5.75411	0.0440851	0.288464		2.04827	6.32162	0.00308486	0.0216655		1.06306	5.80595	0.115323	0.456819
unitig20_34	14.34	28.13	52.03	7.37		-0.927585	3.00543	0.212069	0.488701		0.888464	3.97898	0.217858	0.603265		1.67155	4.57989	0.0176996	0.0744121		1.78789	3.68467	0.0141148	0.133838
unitig20_35	1.67	4.26	5.04	2.7		0.648999	1.59689	0.567307	0.807558		1.17118	1.98599	0.165529	0.537686		1.30417	2.12781	0.145812	0.309886		0.493542	2.12589	0.568539	0.864923
unitig23_1_partial	9	11.89	4.18	9.06		0.0496085	5.51325	0.946125	1		0.306926	5.71686	0.646634	0.902665		-1.30378	5.08795	0.0581169	0.166402		0.228499	5.71645	0.737689	0.941879
unitig23_2	30.74	19.75	24.28	19.63		-0.627024	2.3688	0.489124	0.754155		-0.697537	2.39779	0.374041	0.742308		-0.515046	2.5194	0.527794	0.700597		-0.0991146	2.05796	1	1
unitig23_3	1.68	4.33	8.17	7.96		2.22514	0.702708	0.0729734	0.271802		1.22286	0.162105	0.585507	0.867895		2.03417	0.695256	0.143889	0.307373		-1.03543	0.86876	0.361697	0.741322
unitig23_4	4.82	11.81	34.49	15.23		1.68431	4.83723	0.0158064	0.108275		1.18142	4.54286	0.0926331	0.408513		2.62687	5.71804	0.00023803	0.00397529		-0.531839	5.24829	0.435397	0.786293
unitig23_5	4.05	5.49	5.83	1.74		-1.21584	2.11416	0.162194	0.423718		0.348813	2.85066	0.682082	0.914419		0.333111	2.89232	0.688962	0.826872		1.53728	2.42247	0.056867	0.310558
unitig23_6	16.22	10.31	10.26	12.43		-0.342123	4.15702	0.623825	0.841919		-0.734775	4.05758	0.289914	0.679132		-0.857279	4.06044	0.224646	0.409694		-0.421504	3.84659	0.55773	0.858541
unitig23_7	50.2	28.6	19.88	21.98		-1.15701	5.45804	0.0879062	0.300666		-0.906676	5.60634	0.177868	0.552828		-1.53651	5.46366	0.0250648	0.0943434		0.221564	4.95276	0.749133	0.947406
unitig23_8	43.78	21.35	7.26	181.52		2.08817	7.67634	0.00226275	0.0282325		-1.13526	5.88929	0.0916133	0.406561		-2.78869	5.586	9.88e-05	0.00227535		-3.25237	7.5747	5.86e-06	0.000341573
unitig23_9	25.6	55.5	151.96	70.61		1.51363	4.5737	0.0304585	0.159459		1.03237	4.30551	0.145894	0.511278		2.38162	5.37491	0.000866538	0.00909865		-0.510211	4.94931	0.458373	0.801472
unitig23_10	3.56	1.54	4.25	0.98		-1.79159	2.22174	0.0323868	0.166766		-1.30234	2.40353	0.0973092	0.417166		0.0538987	3.00778	0.963112	1		0.461716	1.47931	0.672306	0.91779
unitig23_11	8.67	4.87	2.82	226.99		4.73806	7.94917	8.59e-10	1.32e-07		-0.940145	3.84156	0.18045	0.55595		-1.84262	3.62573	0.0113769	0.0543783		-5.70748	7.982	1.74e-12	5.07e-10
unitig23_12	0.98	0.72	1.46	2.29		1.12785	0.0594412	0.521739	0.776031		-0.511567	-0.517212	1	1		0.37057	-0.194669	1	1		-1.67726	-0.133225	0.372947	0.7459
unitig23_13	0.83	2.45	2	2.86		1.98698	0.547384	0.0999758	0.323249		1.72843	0.450799	0.333681	0.715792		1.34406	0.273265	0.442579	0.630853		-0.290227	0.921572	0.763627	0.95261
unitig23_14	3.12	3.46	3.75	0.85		-1.83164	3.81913	0.0115267	0.0881221		0.0551854	4.56697	0.948367	1		0.0713613	4.62619	0.924813	0.977793		1.85865	3.92604	0.00954266	0.10318
unitig23_15	11.14	5.03	25.69	3.14		-1.76227	3.31135	0.0195431	0.123219		-1.25798	3.50629	0.0845225	0.395034		1.00276	4.65683	0.148718	0.312618		0.476036	2.5526	0.558578	0.858799
unitig23_16	212.47	930.29	1164.69	651.35		1.65369	8.12356	0.0140301	0.0998523		2.03431	8.48793	0.00282044	0.0660499		2.25553	8.71961	0.0010091	0.0100248		0.35177	8.97227	0.591753	0.87681
unitig23_17	4.66	9.85	24.36	8.44		0.871112	3.04625	0.249307	0.536035		0.966102	3.17596	0.20418	0.584538		2.1668	4.10518	0.00342702	0.0235806		0.0660932	3.47346	0.953864	1
unitig23_18	63.74	60.96	43.92	119.59		0.944793	6.59569	0.156931	0.416202		-0.159764	6.03571	0.812898	0.967064		-0.734542	5.84107	0.27335	0.466713		-1.13344	6.5925	0.090059	0.399702
unitig23_19	15.7	25.8	10.38	16.47		0.107221	5.7618	0.875213	0.97207		0.620252	6.11766	0.353251	0.730525		-0.79429	5.47756	0.239894	0.427147		0.484215	6.13627	0.46632	0.805876
unitig23_20	33.41	30.1	14.12	5.44		-2.58244	5.75793	0.000269097	0.00578936		-0.245513	6.48929	0.712343	0.927973		-1.43938	6.10651	0.0339047	0.116598		2.30838	5.60044	0.00101357	0.021816
unitig23_21	2.15	0.58	0.42	0		-7.40131	1.01478	0.000290613	0.00608202		-1.88361	1.39858	0.0694193	0.361988		-2.42629	1.32507	0.0191124	0.0780361		5.75828	-0.275534	0.0347826	0.236625
unitig23_22	1010.11	343.6	58.06	47.94		-4.36057	8.91708	6.84e-09	8.26e-07		-1.65191	9.31435	0.0138532	0.155651		-4.31834	9.03676	8.8e-09	1.8e-06		2.67993	7.44315	0.000127636	0.00445256
unitig23_23	44.43	8.86	8.15	18.91		-1.17969	4.1458	0.0923552	0.309354		-2.43253	3.91233	0.0010709	0.0393605		-2.64391	3.92548	0.00045733	0.00587877		-1.28197	3.02629	0.0821644	0.383143
unitig23_24	0	0	0.89	6.97		8.53883	2.22041	1.03e-06	6.19e-05		NA	NA	NA	unitig23_24		-0.0855155	0.0565217	0.164268	unitig23_24		2.15292	2.23e-07	1.87e-05
unitig23_25	21.48	9.43	8.75	52.53		1.32025	5.2094	0.0540203	0.229563		-1.28277	3.95556	0.0695623	0.361988		-1.50187	3.94016	0.0352455	0.119705		-2.63223	4.989	0.00026411	0.00793922
unitig23_26	18.07	4.8	2.05	2.36		-2.93255	3.50635	0.000165403	0.00393938		-2.02397	3.70987	0.00649161	0.104335		-3.30818	3.56294	4.54e-05	0.00137238		0.881058	2.07013	0.297457	0.689701
unitig23_27	7.38	14.8	14.76	8.08		0.163431	4.26411	0.828032	0.94916		0.90187	4.76738	0.187584	0.563112		0.794739	4.7504	0.250403	0.440006		0.709682	4.79376	0.294673	0.685871
unitig23_28	77.98	65.04	37.26	51.65		-0.559626	5.50292	0.405772	0.693735		-0.357906	5.65435	0.600114	0.877605		-1.26782	5.36884	0.0634884	0.177475		0.17292	5.35033	0.801097	0.968192
unitig23_29	3.36	3.5	12.77	2.02		-0.577255	0.88988	0.725047	0.896403		-0.0124896	1.17942	1	1		1.76017	2.31293	0.0497057	0.150986		0.537638	0.914364	0.63922	0.89931
unitig23_30	39.77	67.57	71.53	22.74		-0.770871	5.68413	0.252652	0.539164		0.666629	6.45907	0.317482	0.70569		0.644927	6.49726	0.33337	0.529446		1.40875	6.18137	0.0369479	0.244885
unitig23_31	21.81	119.51	146.72	81.95		1.95101	5.96119	0.00480872	0.047889		2.36124	6.36208	0.000721811	0.0319221		2.55431	6.57632	0.000280501	0.00435856		0.381361	6.88452	0.56531	0.86407
unitig23_32	10.03	24.73	20.94	14.48		0.569262	5.25727	0.398193	0.685686		1.20867	5.73867	0.074499	0.373334		0.863996	5.55925	0.202661	0.383362		0.610589	5.90549	0.358213	0.740267
unitig23_33	4.91	3.26	1.89	3.77		-0.342591	2.89409	0.655991	0.863447		-0.696926	2.80518	0.374612	0.742308		-1.56963	2.55905	0.0497053	0.150986		-0.383186	2.60366	0.640815	0.900861
unitig23_34	16.96	12.45	5.69	8.38		-0.970712	3.96696	0.175904	0.445557		-0.542476	4.19277	0.441132	0.787048		-1.76196	3.84457	0.0153287	0.0667943		0.399603	3.69295	0.580972	0.873296
unitig23_35	6.77	6.51	9.96	33.23		2.33091	5.25856	0.00107547	0.0165932		-0.151689	3.66927	0.836273	0.976408		0.362262	3.98974	0.627782	0.783942		-2.51178	5.27495	0.000422592	0.0115397
unitig23_36	5.75	10.93	7.21	22.38		2.00258	5.69521	0.00398236	0.042194		0.834721	4.92146	0.222492	0.607557		0.134962	4.5634	0.857051	0.934004		-1.1968	5.94658	0.0748916	0.365911
unitig23_37	373.18	288.11	258.37	430.62		0.243834	7.85361	0.711511	0.893947		-0.469718	7.57698	0.476388	0.815755		-0.72934	7.52458	0.270025	0.463746		-0.7424	7.70825	0.260766	0.65226
unitig23_38	55.74	44.02	28.77	33.93		-0.67839	7.14775	0.304883	0.593277		-0.435566	7.31282	0.508659	0.835519		-1.15235	7.09996	0.0838204	0.21483		0.213999	6.94373	0.747088	0.946439
unitig23_39	628.13	191.76	209.12	1870.46		1.61167	10.2032	0.0161567	0.109372		-1.80849	8.6115	0.00738333	0.112157		-1.78546	8.66787	0.00812001	0.0431092		-3.44902	9.9832	1.6e-06	0.000104942
unitig23_40	112.87	127.02	199.17	156.6		0.50994	8.9196	0.437599	0.718557		0.07442	8.74672	0.910247	1		0.620237	9.10374	0.345472	0.540872		-0.464362	9.00053	0.479204	0.815775
unitig23_41	30.48	23.42	20.99	6.92		-2.10897	3.92442	0.00427929	0.0440699		-0.483765	4.47708	0.479628	0.816178		-0.738109	4.42388	0.292438	0.487244		1.59706	3.61992	0.0268572	0.202913
unitig23_42	28.86	49.74	72.68	50.29		0.840523	4.57633	0.225585	0.507686		0.691078	4.5501	0.318052	0.70591		1.13665	4.8922	0.101474	0.242645		-0.178322	4.89787	0.799308	0.967513
unitig23_43	10.02	5.28	3.38	5.64		-0.796711	3.58379	0.267592	0.556853		-1.03043	3.56109	0.156275	0.526353		-1.75416	3.39608	0.0173167	0.0730921		-0.262491	3.08756	0.734964	0.940191
unitig23_44	28.58	23.48	18.19	21.2		-0.382315	3.04344	0.624344	0.841919		-0.386842	3.10313	0.603961	0.879994		-0.860704	2.9566	0.269623	0.463357		-0.0332383	2.89047	0.965974	1
unitig23_45	8.78	7.98	7.45	6.76		-0.340944	4.61023	0.62605	0.843277		-0.229796	4.72611	0.749607	0.945283		-0.438214	4.68279	0.524278	0.699409		0.0823594	4.5353	0.921018	1
unitig23_46	0.17	0	1.04	0.59		1.79998	-0.205217	0.430642	0.714331		NA	NA	NA	unitig23_46		0.159051	0.12496	0.27943	unitig23_46		-0.546514	0.0942029	0.408052
unitig23_47	41.18	32.73	15.64	56.84		0.502257	7.48694	0.447807	0.723388		-0.428365	7.08174	0.51698	0.835519		-1.59518	6.74089	0.0182457	0.0759707		-0.959477	7.37605	0.148373	0.510404
unitig23_48	22.7	16.59	14.05	26.5		0.262179	6.00942	0.695114	0.883787		-0.547979	5.68866	0.413976	0.767017		-0.891246	5.60784	0.187749	0.365		-0.839031	5.83533	0.210905	0.597143
unitig23_49	50.64	45.87	60.1	42.55		-0.217052	4.55448	0.75725	0.913448		-0.235266	4.61127	0.741736	0.940795		0.0483091	4.80093	0.955534	0.998245		-0.0470214	4.48083	0.95317	1
unitig23_50	83.15	33.02	24.92	22.55		-1.84497	6.75555	0.00669895	0.0617662		-1.42723	6.92395	0.0338181	0.253681		-1.93831	6.85202	0.00451569	0.0282531		0.388945	5.83327	0.562332	0.861862
unitig23_51	35.16	27.88	31.81	52.55		0.61531	4.56822	0.377247	0.665476		-0.434513	4.08902	0.531754	0.839872		-0.349903	4.17635	0.623825	0.780312		-1.0788	4.45441	0.119927	0.465485
unitig23_52	529.49	294.36	154.08	74.31		-2.79428	7.49608	7.19e-05	0.00213374		-0.942924	7.97398	0.154317	0.523664		-1.98008	7.74557	0.00364621	0.0244348		1.82261	6.75703	0.00745552	0.0887647
unitig23_53	20.83	11.14	8.74	11.91		-0.771264	4.7086	0.259931	0.548844		-0.9938	4.69286	0.150795	0.516749		-1.45801	4.5987	0.0380772	0.126338		-0.251343	4.22342	0.726374	0.936767
unitig23_54	118.59	60.97	39.91	49.18		-1.2327	7.01618	0.0652991	0.254975		-1.05661	7.1375	0.112323	0.446233		-1.77078	6.99142	0.00900866	0.0463067		0.147275	6.41343	0.826786	0.978247
unitig23_55	12.12	10.9	13.36	12.79		0.112213	4.89241	0.876399	0.972307		-0.250589	4.77986	0.716579	0.930515		-0.0636385	4.92009	0.928352	0.980156		-0.391661	4.82376	0.567252	0.864628
unitig23_56	109.75	200.7	81.27	206.19		0.947187	8.1801	0.152368	0.410037		0.773942	8.13542	0.241068	0.635876		-0.632797	7.46536	0.338338	0.532375		-0.202089	8.5409	0.758318	0.951771
unitig23_57	6.27	4.63	5.32	3.94		-0.63514	2.31807	0.474911	0.743313		-0.54076	2.41399	0.502646	0.831515		-0.41901	2.51346	0.614163	0.773079		0.0658917	2.08154	0.942485	1
unitig23_58	11.28	9.89	14.58	18.07		0.71873	5.38607	0.289398	0.577226		-0.284625	4.91154	0.683029	0.914781		0.173529	5.18937	0.805046	0.904638		-1.03227	5.33079	0.125717	0.473226
unitig23_59	150.82	41.88	103.24	36.18		-2.02234	6.37568	0.00327783	0.0370014		-1.94287	6.45721	0.00457154	0.0855591		-0.745207	6.85266	0.262189	0.454333		0.0506893	5.13499	0.947539	1
unitig23_60	250.24	505.79	487.22	382.62		0.650213	6.949	0.327532	0.615669		0.919769	7.18655	0.166035	0.538216		0.762172	7.13692	0.250088	0.439649		0.240717	7.42298	0.715371	0.934036
unitig23_61	4.98	1.99	2.44	2.79		-0.817573	2.89868	0.27538	0.564309		-1.44441	2.74996	0.0681637	0.359096		-1.24291	2.85564	0.10529	0.24945		-0.655794	2.2394	0.43406	0.785656
unitig23_62	16.85	7.38	4.24	7.15		-1.20992	4.47649	0.0822304	0.289209		-1.2883	4.51542	0.0632452	0.348322		-2.20451	4.34309	0.00231098	0.0177594		-0.107123	3.77732	0.887127	0.99423
unitig23_63	27.43	15.72	10.34	10.57		-1.3328	4.31104	0.0581462	0.238191		-0.895867	4.51539	0.195312	0.572235		-1.61125	4.34497	0.0219541	0.0859919		0.408304	3.79775	0.572821	0.868697
unitig23_64	221.29	62.11	17.54	84.54		-1.34857	7.07511	0.0442446	0.202868		-1.93009	6.99852	0.00460985	0.0857958		-3.85471	6.80664	2.15e-07	2.5e-05		-0.610353	6.04226	0.359478	0.74096
unitig23_65	62	87.99	43.37	166.54		1.46004	5.52933	0.0331456	0.169949		0.407223	4.90936	0.553999	0.852421		-0.713008	4.42166	0.309876	0.50441		-1.08175	5.69185	0.108933	0.443679
unitig23_66	23.07	51.8	60.14	49		1.13833	4.07609	0.111181	0.344993		1.08757	4.11044	0.126981	0.476687		1.19238	4.23426	0.0904781	0.22578		-0.0796655	4.53442	0.921018	1
unitig23_67	323.04	239.81	122.5	217.41		-0.533142	8.74532	0.417233	0.704836		-0.525794	8.8151	0.423584	0.774602		-1.59765	8.51656	0.017263	0.0730105		-0.0214891	8.50635	0.974541	1
unitig23_68	9.97	13.01	12.94	17.04		0.790242	3.60515	0.285442	0.571902		0.273387	3.36749	0.743421	0.94098		0.163871	3.35844	0.853446	0.931873		-0.545834	3.73806	0.447861	0.793745
unitig23_69	19.83	8.86	6.93	33.6		0.803693	4.74633	0.244396	0.528855		-1.26266	3.84516	0.0784603	0.384612		-1.7051	3.76982	0.0183348	0.076051		-2.09553	4.4472	0.00334923	0.0501615
unitig23_70	4.25	7.45	3.88	9.65		1.22864	4.02128	0.0826232	0.290107		0.726446	3.75986	0.320819	0.708608		-0.328786	3.24005	0.662457	0.808442		-0.531165	4.30416	0.442955	0.790794
unitig23_71	4.57	5.33	8.79	18.49		2.05889	4.25639	0.0048367	0.0481109		0.134552	3.04015	0.891888	0.998589		0.747552	3.44535	0.322625	0.517679		-1.95364	4.30954	0.00608573	0.0786414
unitig23_72	91.86	53.87	37.07	47.05		-0.928703	7.00293	0.161934	0.423361		-0.866244	7.09114	0.191856	0.56672		-1.50814	6.94443	0.0252089	0.0948122		0.0336343	6.5469	0.963066	1
unitig23_73	0.59	0	2.67	1.3		1.08949	-0.520308	0.658385	0.863447		NA	NA	NA	unitig23_73		-0.0736845	0.282609	0.477906	unitig23_73		-0.912238	0.285714	0.676159
unitig23_74	54.07	63.3	23.64	10.77		-2.28726	5.46634	0.00111461	0.0169912		0.13137	6.33737	0.843541	0.979094		-1.39321	5.78078	0.0405082	0.131449		2.39009	5.62517	0.000701483	0.0168934
unitig23_75	13.52	19.56	80.25	11.82		-0.160782	4.11729	0.827465	0.948639		0.439927	4.4999	0.527251	0.836829		2.3709	5.93321	0.000736989	0.00809924		0.571983	4.40671	0.408714	0.768901
unitig23_76	2.77	2.71	5.77	1.35		-0.983879	0.751944	0.438083	0.718557		-0.126612	1.12625	1	1		0.853502	1.70074	0.369464	0.563765		0.831417	0.728253	0.479207	0.815775
unitig23_77	42.22	61.25	118.07	56.11		0.448752	5.53364	0.50787	0.765975		0.441383	5.59631	0.514569	0.835519		1.28394	6.19043	0.056736	0.164478		-0.0362103	5.7799	0.961445	1
unitig23_78	373.55	328.28	527.53	197.44		-0.881647	8.51423	0.181842	0.451401		-0.282589	8.82138	0.666816	0.90926		0.299095	9.16463	0.648424	0.797892		0.570228	8.38331	0.385927	0.756826
unitig23_79	14.64	12.18	30.68	8.46		-0.752509	3.91209	0.286856	0.572831		-0.363977	4.13576	0.603439	0.879867		0.861123	4.85648	0.211053	0.393878		0.359869	3.75126	0.612534	0.885631
unitig23_80	12.89	8.86	7.87	3.3		-1.91565	3.21792	0.0105522	0.082763		-0.625681	3.67294	0.374367	0.742308		-0.903389	3.61459	0.212838	0.395645		1.26208	2.83876	0.0882445	0.395165
unitig23_81	6.85	7.95	9.7	7.28		0.120044	3.71769	0.885717	0.975604		0.119624	3.78292	0.868977	0.990286		0.299471	3.9312	0.685259	0.824878		-0.0292312	3.81495	0.981624	1
unitig23_82	1.86	2.41	3.17	2.09		0.196595	2.96852	0.813134	0.941241		0.275531	3.0763	0.724796	0.931553		0.564594	3.29337	0.456779	0.643419		0.0501553	3.13216	0.971028	1
unitig23_83	3.33	5.28	4.52	3.91		0.266664	4.12867	0.712035	0.894189		0.565852	4.36667	0.420631	0.7725		0.236449	4.22938	0.741792	0.865187		0.270392	4.44876	0.706577	0.931517
unitig23_84	29.47	43.06	52.29	52.41		0.860249	4.12478	0.219651	0.499545		0.443917	3.93852	0.532375	0.83997		0.62208	4.09563	0.374052	0.56772		-0.445259	4.32982	0.52413	0.841204
unitig23_85	22.36	32.42	45	31.96		0.554282	6.22062	0.406947	0.694876		0.441925	6.22178	0.508769	0.835519		0.812456	6.49829	0.223398	0.407857		-0.141203	6.46122	0.832338	0.979935
unitig23_86	192.92	156.91	91.27	129.6		-0.537444	7.32356	0.416225	0.704118		-0.395301	7.44997	0.549622	0.848958		-1.27975	7.18132	0.0558268	0.163163		0.113312	7.15098	0.863924	0.989206
unitig23_87	3.49	6.36	8.1	4.02		0.248133	3.61216	0.734862	0.901432		0.77218	3.98641	0.271945	0.665803		1.02366	4.20137	0.147323	0.311857		0.495303	4.04556	0.487014	0.822393
unitig23_88	12.85	12.06	9.13	5.08		-1.29719	3.39673	0.081765	0.28888		-0.189223	3.88483	0.798011	0.960613		-0.694609	3.7139	0.337224	0.531226		1.07967	3.33137	0.137456	0.495414
unitig23_89	7.46	12.35	24.01	5.66		-0.377113	2.843	0.648562	0.858496		0.616974	3.4272	0.398169	0.754009		1.47615	4.05223	0.0393412	0.128919		0.965673	3.2568	0.180548	0.558905
unitig23_90	6.7	20.83	45.71	17.96		1.47045	4.22261	0.0402685	0.191163		1.55126	4.35104	0.028708	0.230045		2.58106	5.22055	0.000362722	0.00513409		0.0518901	4.83995	0.954124	1
unitig23_91	485.88	2068.76	2226.64	2015.49		2.089	8.17718	0.00222111	0.0279406		1.99252	8.16689	0.00342106	0.0737796		1.99621	8.22138	0.00335742	0.0232146		-0.125332	8.87144	0.848685	0.983776
unitig23_92	17.14	22.55	17.73	13.52		-0.300715	5.17067	0.660951	0.865128		0.303045	5.54044	0.652424	0.904688		-0.145055	5.35981	0.834353	0.919903		0.574981	5.3903	0.394261	0.759437
unitig23_93	8.22	7.5	4.92	6.72		-0.250256	4.73513	0.719394	0.896403		-0.229305	4.81028	0.742324	0.94098		-0.947294	4.56727	0.166994	0.337912		-0.00785477	4.66335	1	1
unitig23_94	32.43	138.72	84.35	62.17		0.987087	4.00268	0.164742	0.428146		2.01108	4.81674	0.00467936	0.0861858		1.18837	4.25922	0.0909562	0.22643		0.99519	5.02997	0.145949	0.508867
unitig23_95	0	0.36	0.73	0		NA	NA	NA	NA		NA	NA	unitig23_95	3.8308		0.52381	0.699292	NA	NA		NA
unitig23_96	12.9	21.56	18.34	12.59		-0.000763603	3.25407	1	1		0.636263	3.6738	0.387594	0.752405		0.286522	3.52147	0.715742	0.845614		0.608373	3.63754	0.38587	0.756826
unitig23_97	8.07	30.05	55.51	26.01		1.71973	5.29341	0.0132856	0.0965863		1.79713	5.42119	0.00978242	0.130619		2.57869	6.10774	0.000279926	0.0043576		0.0485121	5.98299	0.945628	1
unitig23_98	26.36	11.95	12.08	17.81		-0.526204	4.24502	0.44372	0.721012		-1.23011	4.05334	0.0810621	0.38989		-1.32188	4.07371	0.062482	0.175529		-0.732821	3.70853	0.292453	0.684651
unitig23_99	22.48	35.66	18.81	17.72		-0.307769	5.84194	0.645647	0.856036		0.56894	6.36776	0.391715	0.752977		-0.458398	5.89306	0.494527	0.677261		0.847915	6.22696	0.204525	0.588114
unitig23_100	4.83	4.56	4.35	16.38		1.81481	3.54372	0.0155519	0.107267		-0.173132	2.37019	0.890635	0.998589		-0.33878	2.3403	0.669495	0.81385		-2.01756	3.52167	0.00617673	0.0790939
unitig23_101	204.16	248	145.53	261.81		0.396389	5.6123	0.556965	0.800482		0.186678	5.56336	0.787005	0.956352		-0.685099	5.21139	0.311304	0.506056		-0.23856	5.74065	0.723203	0.936658
unitig23_102	12.42	45.8	81.79	19.97		0.723268	5.85497	0.282456	0.571367		1.78508	6.66653	0.00873976	0.122261		2.51924	7.31453	0.00030394	0.00459649		1.03299	6.83432	0.120858	0.467174
unitig23_103	35.64	40.31	51.46	44.1		0.340366	3.78915	0.641485	0.853733		0.0744789	3.71172	0.931291	1		0.335492	3.90379	0.644413	0.794997		-0.294765	3.85904	0.685548	0.924363
unitig23_104	0.49	1	2.98	0.29		-0.399285	-0.188664	1	1		1.01727	0.460412	0.497906	0.828765		2.51785	1.50179	0.0191124	0.0780361		1.39398	0.267697	0.251568	0.643884
unitig23_105	77.29	191.67	180.09	51.05		-0.561616	5.79258	0.402837	0.691291		1.21314	6.8448	0.069967	0.362884		1.02127	6.76522	0.126536	0.282063		1.74599	6.66849	0.0100716	0.106908
unitig23_106	12.47	12.37	13.03	41.93		1.78315	5.67234	0.00994996	0.0796656		-0.10864	4.5371	0.88198	0.995761		-0.14087	4.57206	0.844771	0.926452		-1.92079	5.69357	0.00535769	0.071749
unitig23_107	1.71	0.18	1.62	0.39		-2.10101	0.605748	0.0729734	0.271802		-3.68023	0.440388	0.0197869	0.187532		-0.346463	1.20053	0.884696	0.952387		-1.61835	-0.721244	0.658385	0.90951
unitig23_108	30.27	87.42	135.24	67.6		1.19485	5.6225	0.0788308	0.28341		1.43365	5.85987	0.034954	0.256289		1.95921	6.31109	0.00446722	0.028074		0.209948	6.26125	0.754681	0.950084
unitig23_109	53.15	34.18	22.49	111.54		1.10402	5.9463	0.102284	0.327952		-0.737447	5.03189	0.277679	0.672542		-1.44047	4.85084	0.0376336	0.125478		-1.87042	5.79963	0.00647934	0.0813396
unitig23_110	134.85	55.46	51.31	47.32		-1.47104	3.40466	0.047676	0.213024		-1.37652	3.4897	0.0569407	0.329936		-1.59043	3.47656	0.0297537	0.106826		0.0659971	2.63156	0.95972	1
unitig23_111	175.46	60.75	70.28	46.89		-1.86388	6.75143	0.00625803	0.0584659		-1.6235	6.87294	0.016455	0.17123		-1.51689	6.95088	0.0244268	0.0925991		0.211591	5.71687	0.756885	0.951228
unitig23_112	1.08	5.92	2.23	0.71		-0.403289	0.0753787	0.769726	0.917838		2.33462	1.65776	0.019615	0.187532		0.830543	0.715867	0.542974	0.714312		2.715	1.49888	0.00477114	0.0659277
unitig23_113	5.85	6.68	7.99	5.51		-0.0401758	2.96347	1	1		0.105103	3.10137	0.931341	1		0.263993	3.23718	0.748978	0.86832		0.116559	3.05428	0.908721	1
unitig23_114	3.8	3.89	6.56	3.5		-0.0828891	2.51166	0.949189	1		-0.0499148	2.58987	0.951983	1		0.58418	2.98855	0.475626	0.660032		0.00426641	2.52301	1	1
unitig23_115	5.58	14.11	33.63	9.14		0.756188	3.74061	0.286855	0.572831		1.24919	4.13467	0.0796284	0.385555		2.39944	5.06876	0.000869162	0.00911492		0.464182	4.35727	0.509128	0.836718
unitig23_116	7.42	15.19	21.62	13.16		0.858988	3.74474	0.227749	0.510367		0.929237	3.85828	0.199355	0.577128		1.3275	4.18139	0.0626266	0.17576		0.0413723	4.16903	0.970979	1
unitig23_117	14.25	10.49	6.69	5.44		-1.34887	4.22107	0.0571238	0.237259		-0.542631	4.56654	0.436919	0.784061		-1.2943	4.34776	0.0648182	0.179418		0.777677	3.91672	0.27343	0.66682
unitig23_118	10.39	4.76	4.54	5.57		-0.772282	1.67932	0.393996	0.682072		-1.11853	1.6088	0.25882	0.652925		-1.31207	1.58764	0.171886	0.34445		-0.374955	1.18584	0.701513	0.92845
unitig23_119	0	0.56	5.24	2.18		7.06576	0.955936	0.000726851	0.0122665		5.11792	-0.3738	0.161491	0.531016		8.22236	1.97861	5.19e-06	0.000282188		-2.05361	1.1001	0.0520938	0.297774
unitig23_120	0.7	1.1	1.33	0.76		0.219209	1.23543	0.884696	0.975541		0.603294	1.50208	0.545468	0.846667		0.733962	1.62825	0.421156	0.612459		0.35573	1.51891	0.7571	0.951228
unitig23_121_partial	0	3.43	0	4.99		5.83257	0.0436003	0.0347826	0.174636		5.11792	-0.3738	0.161491	0.531016		NA	NA	NA	unitig23_121_partial		0.367689	0.670342	0.917451
unitig24_1	6.46	8.04	14.41	4.85		-0.377219	3.79231	0.607007	0.830057		0.227749	4.15497	0.764643	0.950521		0.964238	4.65027	0.165285	0.336036		0.576301	3.96993	0.411968	0.771428
unitig24_2	6.45	5.53	5.56	6.89		0.128728	4.84846	0.862587	0.965472		-0.322028	4.69458	0.644832	0.901724		-0.410913	4.70546	0.561347	0.728816		-0.479625	4.75016	0.483874	0.819377
unitig24_3	14.45	14.49	16.08	7.38		-0.923432	1.76283	0.307713	0.596314		-0.109607	2.15627	0.93615	1		-0.0282686	2.24437	1	1		0.786239	1.75709	0.372408	0.7459
unitig24_4	3.56	1.83	4.65	0.68		-2.47599	0.850567	0.0222081	0.131953		-1.06134	1.21249	0.302645	0.688914		0.144574	1.76681	0.917982	0.974625		1.39398	0.267697	0.251568	0.643884
unitig24_5	706.55	270.45	94.27	125.33		-2.45736	8.91503	0.000372969	0.00741989		-1.48162	9.18229	0.0265921	0.220401		-3.10446	8.94995	1.21e-05	0.000509586		0.946928	7.83078	0.152583	0.516966
unitig24_6	19.21	9.46	6.39	18.62		-0.00751524	4.46929	1	1		-1.11309	4.07736	0.111452	0.445915		-1.76667	3.94056	0.0136111	0.0615219		-1.13457	4.06792	0.104319	0.433797
unitig24_7	4.9	4.95	8.83	7.83		0.724115	3.05243	0.345784	0.633141		-0.0789145	2.67289	0.954483	1		0.656134	3.12993	0.384293	0.579353		-0.832174	3.04565	0.273	0.66682
unitig24_8	13.99	89.62	84.99	21.23		0.639365	6.27182	0.339168	0.627029		2.58263	7.78633	0.000209923	0.0150397		2.40331	7.68613	0.000517465	0.00641258		1.91445	7.8669	0.0047902	0.0660269
unitig24_9	14.69	4.98	6.06	10.03		-0.50413	4.56125	0.464887	0.736174		-1.65269	4.24386	0.0201512	0.188906		-1.46813	4.34098	0.0359838	0.121483		-1.17756	3.88497	0.0979624	0.417943
unitig24_10	5.49	2.45	2.87	2.7		-0.947377	1.46608	0.315121	0.602161		-1.20913	1.42776	0.205414	0.586952		-1.14313	1.48846	0.232646	0.418451		-0.290227	0.921572	0.763627	0.95261
unitig24_11	28.99	7.33	7.52	15.07		-0.908709	5.07497	0.180292	0.45013		-2.07296	4.82329	0.00341348	0.0737796		-2.14311	4.85842	0.00241904	0.018259		-1.19321	4.14661	0.0889949	0.397083
unitig24_12	9.5	9.56	10.23	6.78		-0.412789	1.74678	0.686852	0.878169		-0.0453706	1.97247	1	1		-0.056643	2.01436	1	1		0.339215	1.76261	0.723661	0.936767
unitig24_13	0	0.35	0.87	1.71		6.40907	0.447931	0.00614931	0.0575774		4.40839	-0.728015	0.285714	0.674324		5.34653	-0.218882	0.0942029	0.230654		-2.10832	0.536083	0.083497	0.383909
unitig24_14	16.16	55.61	85.38	63.94		2.02311	5.2045	0.00397716	0.042194		1.68807	5.01376	0.0156991	0.165901		2.20412	5.47125	0.0017539	0.0147913		-0.363966	5.76216	0.58945	0.875857
unitig24_15	22.24	19.77	41.29	40.36		0.893936	5.85114	0.185178	0.455128		-0.268959	5.27293	0.689371	0.917786		0.690505	5.84114	0.304259	0.49852		-1.1918	5.81008	0.0763577	0.370724
unitig24_16	29.42	64.09	111.97	65.93		1.20317	6.13712	0.0737405	0.272807		1.02979	6.08625	0.124809	0.471885		1.73158	6.64297	0.0110987	0.05344		-0.202239	6.57506	0.763706	0.95261
unitig24_17	16.68	12.38	14.23	12.81		-0.347212	5.24316	0.610414	0.832293		-0.528891	5.23078	0.43234	0.780075		-0.429268	5.32358	0.524922	0.699787		-0.210507	5.02178	0.760339	0.952457
unitig24_18	29.64	20.17	7.98	24.08		-0.264716	5.72514	0.692803	0.882809		-0.654905	5.62542	0.329481	0.713847		-2.08794	5.26267	0.00284029	0.0204906		-0.419034	5.45557	0.533774	0.84691
unitig24_19	129.9	97.89	54.15	98.81		-0.356439	5.3003	0.603202	0.827487		-0.503152	5.30281	0.460414	0.803786		-1.45352	5.02521	0.0360175	0.1215		-0.175537	5.09005	0.800544	0.967755
unitig24_20	28.06	14.33	0	25.38		-0.112145	3.25969	0.907115	0.985539		-1.09419	2.91947	0.150372	0.515927		-8.89666	2.35203	1.94e-07	2.38e-05		-1.01117	2.8477	0.17717	0.553532
unitig25_1	99.48	98.44	25.8	31.04		-1.64476	6.93179	0.0150417	0.104587		-0.112242	7.54482	0.865846	0.989856		-2.14459	6.94138	0.00183332	0.0152042		1.50374	6.89215	0.0256292	0.195745
unitig25_2	871.23	1205.54	489.25	892.52		0.0723562	9.43998	0.912386	0.987995		0.372331	9.66842	0.570038	0.861118		-1.03171	9.09558	0.118796	0.269993		0.271136	9.67993	0.678931	0.921246
unitig26_1	179.45	191.88	164.06	172.75		-0.0155869	6.77694	0.985859	1		0.00193994	6.85238	1	1		-0.327215	6.74764	0.62223	0.779878		-0.0113079	6.82523	0.990622	1
unitig26_2	826.1	548.39	237.74	251.09		-1.68061	7.8855	0.0126308	0.0938428		-0.687485	8.25794	0.29685	0.684738		-1.99475	7.93393	0.00339208	0.023397		0.964312	7.43928	0.145992	0.508867
unitig26_3	8133.28	1670.29	1989.71	1322.89		-2.58246	13.0989	0.000191086	0.00442639		-2.37989	13.1966	0.000530411	0.0276639		-2.2302	13.2731	0.0010947	0.0106264		0.17373	11.4458	0.790507	0.963263
unitig26_4	4.28	7.17	14.74	6.04		0.546454	3.38912	0.449714	0.724513		0.657146	3.52272	0.367202	0.742308		1.5937	4.20976	0.0265472	0.0982236		0.0818557	3.71634	0.921253	1
unitig26_5	17.76	12.51	18.3	23.36		0.434336	3.79312	0.548527	0.792921		-0.594277	3.35141	0.442156	0.787531		-0.153654	3.59805	0.850498	0.930328		-1.05768	3.6097	0.13618	0.492279
unitig26_6	18.17	15.25	17.69	24.85		0.488179	6.11171	0.466603	0.737544		-0.350357	5.74757	0.602624	0.878982		-0.238738	5.84908	0.722975	0.851078		-0.86741	6.02491	0.194423	0.572863
unitig26_7	0	0	0	0		NA	NA	NA	NA		NA	NA	NA	NA		NA	NA	NA	NA
unitig26_8	4.03	1.77	2.07	2.96		-0.414449	2.82671	0.608185	0.830903		-1.2621	2.56941	0.11036	0.444052		-1.15624	2.64802	0.142227	0.305483		-0.87679	2.31112	0.285285	0.676159
unitig26_9	14.05	6.02	15.68	23.25		0.756644	4.83258	0.272278	0.560943		-1.33075	3.94118	0.063826	0.348782		-0.0473461	4.49777	0.959011	0.999677		-2.11655	4.51324	0.00301118	0.0471993
unitig26_10_partial	0	0	0	0		NA	NA	NA	NA		NA	NA	NA	NA		NA	NA	NA	NA
unitig30_1	16.81	23.81	17.8	32.65		0.994438	5.31987	0.143314	0.397859		0.40535	5.02311	0.558869	0.854372		-0.116712	4.79785	0.86711	0.94158		-0.61798	5.50975	0.358615	0.740554
unitig30_2	26.79	28.48	33.85	23.76		-0.13554	4.28183	0.860201	0.963834		-0.00810047	4.40997	1	1		0.138107	4.53639	0.853831	0.931873		0.0986512	4.32272	0.896176	0.996182
unitig30_3	7.53	5.52	5.94	5.29		-0.471385	5.67968	0.480484	0.748295		-0.542915	5.71571	0.418382	0.770568		-0.540392	5.76753	0.420694	0.612102		-0.100352	5.44006	0.884915	0.99423
unitig30_4	48.59	22.45	22	97.69		1.04501	6.16107	0.119292	0.358811		-1.20897	5.12496	0.0762574	0.379001		-1.34093	5.13529	0.0500406	0.151786		-2.28297	5.91727	0.00103342	0.022178
unitig30_5	25.34	16.45	13.9	22.78		-0.116077	3.96822	0.884668	0.975541		-0.718808	3.76898	0.316206	0.704032		-1.06389	3.69159	0.142469	0.305744		-0.631645	3.68943	0.374185	0.7459
unitig30_6	331.03	318.67	819.96	250.33		-0.365424	8.21219	0.578443	0.81378		-0.151029	8.37671	0.818586	0.969844		1.10961	9.16085	0.0939751	0.230654		0.18556	8.17634	0.777926	0.957459
unitig30_7	49.01	61.31	105.46	87.38		0.871683	5.84402	0.195221	0.466303		0.227011	5.52812	0.742929	0.94098		0.906346	5.98548	0.177673	0.352439		-0.673548	5.97349	0.31166	0.700408
unitig30_8	22.72	29.36	87.93	33.44		0.594773	4.05247	0.405252	0.693184		0.273587	3.93445	0.708834	0.926768		1.75205	4.96596	0.0122163	0.0569779		-0.350083	4.202	0.618043	0.890255
unitig30_9	16.73	17.97	34.68	31.57		0.952542	4.6829	0.167131	0.431611		0.00704239	4.19916	1	1		0.851535	4.73702	0.215507	0.398161		-0.974461	4.72416	0.152469	0.516909
unitig30_10	45.9	25.73	36.71	41.11		-0.121228	4.40006	0.885208	0.975541		-0.929963	4.12642	0.185661	0.562475		-0.520529	4.3347	0.454166	0.641229		-0.837668	4.04179	0.23578	0.628128
unitig30_11	156.21	61.8	32.01	95.21		-0.6766	8.15652	0.304649	0.593231		-1.43381	7.97581	0.0321973	0.247448		-2.48522	7.80852	0.000341342	0.00491672		-0.786052	7.50207	0.234075	0.626413
unitig30_12	461.17	51.36	41.48	43.42		-3.37043	7.53823	3.05e-06	0.000160356		-3.26207	7.61415	5.48e-06	0.00110239		-3.67271	7.63064	5.17e-07	4.98e-05		0.0795867	5.1497	0.911125	1
unitig30_13	49.57	73.26	83.81	73.11		0.598303	8.027	0.363968	0.652831		0.467445	8.01655	0.4778	0.815755		0.558719	8.12165	0.396326	0.589489		-0.1597	8.27907	0.808217	0.971674
unitig30_14	182.7	115.98	66.17	155.87		-0.191384	7.75909	0.771901	0.919733		-0.751672	7.59031	0.255099	0.647823		-1.66382	7.36311	0.0136715	0.0616636		-0.589132	7.45807	0.371885	0.7459
unitig30_15	48.56	81.42	169.52	20.33		-1.21777	6.54884	0.0688906	0.262729		0.649557	7.46263	0.326235	0.711056		1.60468	8.16751	0.0169968	0.072245		1.83856	7.07372	0.00685718	0.0840004
unitig30_16	21.78	31.7	63.4	26.53		0.321853	6.42843	0.6286	0.845083		0.445099	6.56515	0.502408	0.831515		1.34221	7.19868	0.0454544	0.142881		0.0944099	6.68842	0.889558	0.994985
unitig30_17	6.23	3.99	13.23	5.71		-0.087543	3.27163	0.938547	0.999157		-0.738095	3.04849	0.327732	0.712842		0.88593	3.9429	0.20884	0.391211		-0.679534	2.98827	0.374637	0.7459
unitig30_18	22.76	22.65	65.86	4.35		-2.33374	2.40143	0.00507411	0.049843		-0.102317	3.17167	0.901936	1		1.33212	4.0884	0.0617008	0.174141		2.20518	2.41545	0.00866434	0.0984552
unitig30_19	267.16	550.4	1043.57	309.58		0.25024	7.53925	0.704841	0.890264		0.946535	8.02524	0.152879	0.520515		1.76669	8.66515	0.00880988	0.0454918		0.667462	8.09221	0.311015	0.700408
unitig30_20	488.34	330.06	200.21	243.3		-0.967408	9.8837	0.14274	0.397518		-0.661265	10.0616	0.314092	0.702098		-1.48525	9.84641	0.0261408	0.0973567		0.277306	9.5285	0.672114	0.91779
unitig30_21	10.45	9.85	18.58	17.7		0.796982	5.65926	0.23849	0.523913		-0.181362	5.18388	0.790442	0.958325		0.630451	5.67464	0.351237	0.546769		-1.00725	5.642	0.135067	0.490417
unitig30_22	272.64	680.22	1147.89	480.56		0.855361	9.16373	0.194574	0.465739		1.22281	9.47774	0.0654727	0.353001		1.87494	10.0145	0.00551254	0.0326823		0.338612	9.76992	0.60524	0.88352
unitig30_23	286.92	521.94	840.11	689.24		1.30191	7.8408	0.0510132	0.222443		0.767028	7.54894	0.246516	0.641049		1.35088	7.99441	0.0430222	0.137373		-0.563734	8.15545	0.391581	0.75914
unitig30_24	8.76	28.09	32.09	743.21		6.44228	9.69412	1.04e-14	6.28e-12		1.58328	5.32235	0.0225767	0.201546		1.67257	5.44147	0.0152275	0.066413		-4.88797	9.7868	2.23e-10	3.56e-08
unitig30_25	203.67	156.63	56.74	171.78		-0.207953	9.60054	0.751002	0.910586		-0.474972	9.54953	0.469034	0.810278		-2.04254	9.1317	0.00265494	0.0195548		-0.295858	9.41496	0.65164	0.906756
unitig30_26	90.65	236.3	147.99	29.26		-1.59215	4.99123	0.0216414	0.130606		1.28578	6.43199	0.0566866	0.328914		0.508102	5.97851	0.446947	0.634704		2.84938	6.08889	6.54e-05	0.00265444
unitig30_27	12.96	12.4	14.37	7.41		-0.767865	3.51518	0.294153	0.581751		-0.159569	3.83897	0.853684	0.984321		-0.0493993	3.94324	0.960136	1		0.579737	3.47284	0.428031	0.784786
unitig30_28	54.02	58.81	51.19	112.53		1.09563	4.95266	0.110918	0.344784		0.0265214	4.38342	0.985427	1		-0.276021	4.28684	0.707166	0.839222		-1.09806	5.00152	0.105587	0.436511
unitig30_29	38.13	48.94	36.78	39.78		0.098588	3.60983	0.92651	0.993991		0.263771	3.7637	0.738042	0.939105		-0.25032	3.5519	0.746206	0.86637		0.136406	3.77999	0.849863	0.984327
unitig30_30	31.59	60.53	69.38	36.03		0.227155	7.46654	0.731226	0.899688		0.841822	7.89697	0.203067	0.582731		0.936032	8.00958	0.157476	0.325305		0.585834	7.95939	0.373693	0.7459
unitig30_31	34.08	23.18	30.63	39.15		0.237395	4.44314	0.738584	0.904378		-0.651502	4.09026	0.359489	0.736935		-0.352434	4.26689	0.617459	0.775618		-0.91785	4.22643	0.186158	0.565102
unitig30_32	88.52	64.51	42.76	58.97		-0.548272	6.72833	0.41003	0.697815		-0.552449	6.79298	0.405163	0.758804		-1.24814	6.59895	0.0630977	0.176639		-0.0330048	6.47568	0.964204	1
unitig30_33	58.07	50.96	61.34	82.55		0.544716	5.93597	0.417665	0.705425		-0.28695	5.56679	0.670416	0.90926		-0.118557	5.69672	0.868018	0.942027		-0.860546	5.87414	0.199778	0.58067
unitig30_34	29.61	29.62	41.65	41.14		0.517821	4.95361	0.445615	0.721362		-0.0932636	4.69071	0.905234	1		0.295648	4.94479	0.666124	0.811166		-0.639978	4.9595	0.345682	0.727314
unitig30_35	25.46	19.16	29.64	35.05		0.497889	4.2961	0.480441	0.748295		-0.50583	3.8556	0.479456	0.816178		0.0200636	4.15156	1	1		-1.03271	4.14965	0.141366	0.503512
unitig30_36	18.02	62.27	47.4	46.47		1.40355	6.89034	0.0367236	0.180627		1.69219	7.17227	0.0124419	0.148122		1.19568	6.86178	0.0744734	0.199128		0.259796	7.62142	0.693472	0.926796
unitig30_37	69.8	43.43	42.43	62.75		-0.115916	5.96331	0.866929	0.967267		-0.780504	5.74606	0.246766	0.641237		-0.916752	5.74736	0.173401	0.346638		-0.69345	5.66103	0.300696	0.692663
unitig30_38	79.52	79.34	65.66	225.65		1.54231	9.9809	0.0211139	0.128523		-0.0994178	9.03084	0.879836	0.994137		-0.475172	8.91274	0.469326	0.654894		-1.67057	10.0111	0.0128005	0.125445
unitig30_39	0	0	0	0		NA	NA	NA	NA		NA	NA	NA	NA		NA	NA	NA	NA
unitig30_40	0	0	0	0		NA	NA	NA	NA		NA	NA	NA	NA		NA	NA	NA	NA
unitig30_41	57.52	40.27	33.67	134.92		1.26704	5.5389	0.0636773	0.251233		-0.609675	4.56089	0.377247	0.746372		-0.970229	4.47495	0.161969	0.331008		-1.90572	5.4315	0.00584129	0.0763079
unitig30_42	20.95	18.39	20.31	46.65		1.19233	6.68515	0.0758902	0.277651		-0.283954	5.90014	0.672154	0.910268		-0.2439	5.96948	0.715853	0.845627		-1.50518	6.655	0.025627	0.195745
unitig30_43	20.57	9.77	13.45	18.51		-0.11432	5.57557	0.871181	0.969699		-1.16987	5.22316	0.0859257	0.395822		-0.811569	5.39566	0.231947	0.417801		-1.08446	5.13705	0.112194	0.450315
unitig30_44	32.94	21.73	20.89	37.81		0.236661	5.95989	0.72677	0.896403		-0.695976	5.594	0.302907	0.689122		-0.855381	5.58494	0.204732	0.386331		-0.961519	5.7315	0.153318	0.518447
unitig30_45	51.18	36.91	64.13	85.83		0.783288	6.37565	0.239466	0.524666		-0.567403	5.73995	0.400724	0.755598		0.126465	6.11392	0.851319	0.930986		-1.37959	6.2425	0.040978	0.260883
unitig30_46	81.03	147.95	138.11	184.43		1.22404	6.97682	0.0672842	0.259276		0.77233	6.74347	0.244707	0.639097		0.570299	6.67078	0.38994	0.584251		-0.480571	7.30114	0.466608	0.80608
unitig30_47	4311.41	5498.22	4156.3	10413.6		1.30991	12.4177	0.0485951	0.215342		0.25467	11.8188	0.697012	0.922161		-0.251769	11.6168	0.700309	0.834911		-1.08408	12.5487	0.100914	0.425597
unitig30_48	87.93	47.25	53.26	53.67		-0.674606	8.10514	0.306143	0.594634		-0.992182	8.05731	0.134142	0.488917		-0.921998	8.13246	0.16334	0.332799		-0.346414	7.6292	0.598941	0.879934
unitig30_49	29.26	27.28	24.01	37.62		0.399725	4.5333	0.571997	0.811041		-0.197147	4.28832	0.784926	0.955611		-0.483498	4.20937	0.49276	0.675922		-0.625777	4.49431	0.370319	0.7459
unitig30_50	6.99	21.54	4.2	9.19		0.42434	0.648624	0.840166	0.954261		1.50833	1.34215	0.122481	0.468531		-0.910015	0.205046	0.585507	0.748745		1.0564	1.35166	0.298081	0.690046
unitig30_51	34.99	29.06	17.03	46.02		0.432821	6.75112	0.51335	0.771062		-0.364189	6.41358	0.585715	0.867895		-1.23716	6.14227	0.0663816	0.182732		-0.825871	6.65721	0.213177	0.600075
unitig30_52	18.62	69.67	109.18	130.55		2.84533	5.89029	7.43e-05	0.00218709		1.80585	5.10357	0.00991749	0.131629		2.35111	5.59176	0.000881834	0.00918166		-1.06844	6.31457	0.110241	0.445854
unitig30_53	8.04	14.95	30.18	13.96		0.832231	4.48209	0.228508	0.510985		0.796589	4.52719	0.24866	0.641237		1.70727	5.21546	0.0142832	0.0635355		-0.0645103	4.85414	0.936466	1
unitig30_54	9.83	3.01	3.6	4.45		-1.10556	3.67443	0.125962	0.369904		-1.80183	3.53888	0.0156241	0.165315		-1.64452	3.6242	0.0258833	0.0965671		-0.725196	2.79587	0.335692	0.71991
unitig30_55	68.37	38.5	12.89	29.19		-1.18949	5.75311	0.0788965	0.28341		-0.92406	5.90556	0.169454	0.542034		-2.60353	5.55717	0.000259027	0.00418618		0.236655	5.2322	0.731064	0.939511
unitig30_56	93.37	58.6	48.48	142.85		0.650973	6.11914	0.330973	0.62007		-0.767892	5.48695	0.25506	0.647823		-1.14384	5.40716	0.0926438	0.228818		-1.44778	5.91721	0.0324209	0.227756
unitig30_57	291.92	155.14	116.75	261.85		-0.119098	7.83854	0.857226	0.962146		-1.00803	7.54493	0.128951	0.480698		-1.52081	7.44427	0.0237616	0.0905286		-0.917786	7.4531	0.165379	0.537961
unitig30_58	4.91	5.79	11.53	10.13		1.07947	2.96246	0.170644	0.437078		0.142147	2.47111	0.897076	0.999413		1.02983	3.0514	0.190097	0.367962		-0.966591	3.02097	0.189492	0.56649
unitig30_59	295.73	259.85	103.46	173.84		-0.728774	8.48017	0.268751	0.558552		-0.282748	8.73153	0.666718	0.90926		-1.71399	8.29999	0.0109858	0.0531075		0.417193	8.35686	0.525447	0.842166
unitig30_60	67.18	158.64	187.04	214.52		1.71264	8.29226	0.0110471	0.0853778		1.14348	7.94516	0.0856177	0.395525		1.27828	8.09071	0.055143	0.161992		-0.598012	8.70044	0.362983	0.742163
unitig30_61	189.34	242.52	139.57	143.56		-0.361597	9.15415	0.581464	0.814223		0.260976	9.52702	0.690514	0.918874		-0.638882	9.15732	0.331136	0.526887		0.593737	9.35175	0.365947	0.744481
unitig30_62	26.49	30.39	43.64	31.57		0.290254	4.93526	0.678041	0.873243		0.101936	4.90072	0.897481	0.999413		0.520845	5.18515	0.448445	0.636123		-0.217167	5.02531	0.753138	0.949299
unitig30_63	23.03	16.02	20.87	25.67		0.193738	4.90413	0.787175	0.926641		-0.619379	4.58907	0.370127	0.742308		-0.341178	4.7577	0.625759	0.781876		-0.842028	4.6958	0.218796	0.605923
unitig30_64	27.03	68.88	161.83	83.64		1.66595	5.33121	0.0163765	0.110541		1.25217	5.09843	0.0696226	0.361988		2.38151	6.02068	0.000718282	0.0080015		-0.442689	5.78025	0.508336	0.836431
unitig30_65	12.28	26.7	46.72	21.46		0.840497	3.0767	0.284504	0.571902		1.02188	3.26244	0.171798	0.544918		1.72547	3.81329	0.0192018	0.0783211		0.152511	3.53875	0.846424	0.983111
unitig30_66	12.38	20.55	23.69	22.39		0.891417	5.89264	0.186511	0.455876		0.634434	5.79836	0.344222	0.725941		0.736563	5.91289	0.271343	0.464582		-0.285843	6.19093	0.668219	0.917267
unitig30_67	153.03	239.81	53.07	165.2		0.148043	8.61015	0.82197	0.945888		0.551901	8.90337	0.401041	0.755598		-1.72655	8.03171	0.0104763	0.051406		0.37502	8.94399	0.567551	0.864635
unitig30_68	84.87	737.51	469.03	1532.34		4.21161	9.57921	1.68e-08	1.73e-06		3.02284	8.55066	1.97e-05	0.00264835		2.26712	7.95278	0.000981141	0.00989425		-1.21763	10.0807	0.0663675	0.340968
unitig30_69	46.39	35	38.5	30.98		-0.544797	5.40731	0.420876	0.707597		-0.502255	5.49052	0.457535	0.801692		-0.467638	5.55584	0.48803	0.671932		0.0137343	5.1817	0.985466	1
unitig30_70	195.82	152.54	187.66	284.24		0.575116	6.68925	0.387757	0.677654		-0.456389	6.2283	0.49166	0.826341		-0.260287	6.36586	0.695447	0.833004		-1.06038	6.57339	0.111506	0.448405
unitig30_71	9.82	12.77	20.69	14.98		0.645148	3.94229	0.368708	0.657685		0.281719	3.79841	0.703396	0.923492		0.874529	4.2055	0.215146	0.397897		-0.392342	4.09134	0.579056	0.873296
unitig30_72	67.57	38.96	44.65	29.01		-1.18187	6.03338	0.0794672	0.284581		-0.890197	6.1955	0.183171	0.560171		-0.796527	6.28018	0.233022	0.418741		0.262885	5.53065	0.698506	0.92845
unitig30_73	127.3	45.66	51.04	62.41		-0.990655	7.71373	0.13561	0.385488		-1.57497	7.60896	0.0192247	0.186383		-1.51717	7.67486	0.0238743	0.09087		-0.613159	6.92504	0.354546	0.734867
unitig30_74	222.6	174.32	197.54	694.58		1.67931	9.6469	0.0124109	0.0927081		-0.448849	8.43529	0.494714	0.827906		-0.371212	8.51999	0.572072	0.737944		-2.15701	9.60848	0.00156224	0.029668
unitig30_75	99.27	124.49	96.43	153.92		0.670375	8.81274	0.308383	0.59653		0.230405	8.62562	0.72585	0.931553		-0.240809	8.44154	0.714117	0.844569		-0.468814	8.95568	0.475048	0.812312
unitig30_76	42.5	56.94	88.74	63.43		0.6129	2.66957	0.454799	0.729387		0.324325	2.56971	0.713639	0.929027		0.860284	2.94117	0.27538	0.469142		-0.317561	2.82007	0.688972	0.924555
unitig30_77	13.86	12.33	9.36	9.07		-0.574007	5.24766	0.39599	0.683286		-0.264826	5.44677	0.69633	0.921794		-0.764199	5.2889	0.261698	0.453667		0.280397	5.14478	0.680462	0.921891
unitig30_78	51.74	42.44	31.82	35.37		-0.511014	6.73188	0.441303	0.720447		-0.382111	6.85306	0.565179	0.858097		-0.900051	6.70038	0.176744	0.351095		0.100078	6.56831	0.88283	0.99423
unitig30_79	35.25	29.57	29.93	27.75		-0.307545	6.2517	0.642399	0.854491		-0.349526	6.29931	0.599602	0.877604		-0.435158	6.31306	0.51521	0.693817		-0.07081	6.11776	0.916144	1
unitig30_80	4271.68	1468.15	2467.78	1022.87		-2.02449	12.3363	0.00283581	0.033534		-1.63693	12.4883	0.0145555	0.158115		-0.990496	12.7257	0.133211	0.291655		0.358712	11.2479	0.583648	0.875043
unitig30_81	1302.24	423.08	304.31	646.74		-0.972025	10.2293	0.140775	0.393731		-1.71809	10.0846	0.0105783	0.135089		-2.29624	10.0202	0.000805785	0.00862208		-0.774905	9.38974	0.239048	0.630097
unitig30_82	113.62	64.46	38.14	261.29		1.23902	7.87864	0.0629301	0.249449		-0.913685	6.8096	0.170122	0.542803		-1.77333	6.6141	0.00920525	0.0469335		-2.18158	7.71687	0.00145593	0.0284376
unitig30_83	116.41	214.95	269.53	414.28		1.8689	8.66209	0.00573719	0.0547494		0.788509	7.95915	0.232699	0.623136		1.01218	8.1562	0.126693	0.282242		-1.10925	8.92337	0.0940154	0.408052
unitig30_84	265	1095.81	1811.63	736.74		1.51284	11.422	0.0234913	0.13666		1.95179	11.8261	0.00392111	0.0793039		2.5743	12.3922	0.000199637	0.00358839		0.410114	12.2704	0.530955	0.845609
unitig30_85	47.79	56.45	76.46	40.29		-0.208468	4.71318	0.770288	0.918199		0.144075	4.95463	0.842078	0.978683		0.478778	5.19219	0.477334	0.661392		0.323764	4.83723	0.643588	0.90175
unitig30_86	9.45	3.96	6.84	4.19		-1.12913	2.14142	0.198245	0.470039		-1.34243	2.1262	0.115723	0.453138		-0.662867	2.40971	0.453309	0.640445		-0.241814	1.48743	0.832809	0.979935
unitig30_87	48.51	63.71	108.5	86.37		0.869286	4.94526	0.201222	0.474777		0.296937	4.66937	0.672094	0.910268		0.961741	5.125	0.159552	0.328084		-0.60125	5.09719	0.375274	0.746761
unitig30_88	44.05	90.28	81.64	115		1.42205	7.62878	0.0339719	0.172409		0.9392	7.36143	0.156972	0.527391		0.691314	7.25486	0.296943	0.492679		-0.511705	7.99782	0.436789	0.786818
unitig30_89	26.54	38.94	54.7	55.21		1.09316	4.68967	0.112299	0.347163		0.45635	4.35683	0.523815	0.835519		0.8436	4.64517	0.221978	0.405876		-0.665739	4.88733	0.332732	0.719213
unitig30_90	42.13	57.77	97.02	100.85		1.29633	5.36311	0.0575824	0.237282		0.359275	4.83349	0.60639	0.881289		1.00404	5.28227	0.141875	0.305267		-0.96598	5.51801	0.15277	0.517391
unitig30_91	111.26	85.66	58.81	104.84		-0.0481257	6.83125	0.942854	1		-0.473264	6.7037	0.475209	0.815067		-1.11856	6.51673	0.0944567	0.230943		-0.453984	6.65985	0.493097	0.826294
unitig30_92	32.56	59.36	140.11	54.41		0.777964	6.2034	0.244524	0.528895		0.769782	6.26544	0.249012	0.641505		1.90599	7.12698	0.00518834	0.0312849		-0.0370288	6.5799	0.955589	1
unitig30_93	21.79	31.68	51.67	41.2		0.955415	4.11306	0.176632	0.446134		0.443222	3.86492	0.547616	0.847902		1.04557	4.2932	0.142321	0.30553		-0.541141	4.30995	0.434697	0.785656
unitig30_94	42.91	87.99	75.11	60.4		0.530908	6.31933	0.424043	0.709788		0.93979	6.6417	0.158556	0.528979		0.608866	6.4844	0.362031	0.557679		0.380048	6.82177	0.565945	0.864253
unitig30_95	107.21	89.35	83.84	221.28		1.08303	8.40847	0.102394	0.328092		-0.358954	7.66576	0.586109	0.867895		-0.553603	7.63468	0.401102	0.59408		-1.47084	8.3563	0.0278282	0.207658
unitig30_96	9.03	7.2	9.89	7.34		-0.260519	5.12838	0.699955	0.887262		-0.423205	5.12154	0.533176	0.840318		-0.0679009	5.33676	0.922983	0.977351		-0.191515	4.96282	0.782762	0.958992
unitig30_97	0	0	0	0		NA	NA	NA	NA		NA	NA	NA	NA		NA	NA	NA	NA
unitig30_98	32.44	50.02	103.27	27.31		-0.210389	5.61097	0.757234	0.913448		0.528413	6.06829	0.430223	0.779749		1.4714	6.74667	0.0293607	0.105818		0.710008	5.96131	0.286287	0.67658
unitig30_99	73	48.17	43.55	54.81		-0.37562	5.50221	0.579332	0.813861		-0.695428	5.436	0.30239	0.688914		-0.943489	5.39524	0.163743	0.333459		-0.348646	5.20264	0.607587	0.88504
unitig30_100	59.97	169.71	168.25	53.61		-0.124008	8.53802	0.850634	0.959204		1.4047	9.53259	0.0351244	0.256456		1.28941	9.50128	0.052461	0.156553		1.49988	9.47336	0.0247897	0.191212
unitig30_101	260.69	174.77	123.52	246.22		-0.0447029	7.37772	0.947557	1		-0.67287	7.16823	0.308333	0.695476		-1.27624	7.01423	0.0566527	0.164322		-0.657015	7.12599	0.320363	0.708137
unitig30_102	6.35	20.86	54.7	16.36		1.39942	3.94604	0.0503785	0.220825		1.61627	4.17362	0.0249283	0.212658		2.90397	5.2696	7.35e-05	0.00190976		0.187933	4.61055	0.78804	0.962429
unitig30_103	139.65	112.43	96.72	133.89		-0.0231204	5.31707	0.984575	1		-0.408763	5.20319	0.548852	0.848573		-0.728369	5.12288	0.282062	0.477826		-0.414495	5.17412	0.544185	0.850975
unitig30_104	64.56	90.19	139.62	73.15		0.217674	4.92749	0.752001	0.910942		0.385946	5.08731	0.56851	0.860288		0.913383	5.46118	0.180384	0.356098		0.139451	5.16045	0.846043	0.983111
unitig30_105	55.36	22.56	37.61	17.52		-1.62047	4.61364	0.0201491	0.124635		-1.38982	4.73799	0.0461832	0.295782		-0.755951	4.99753	0.272611	0.465734		0.201985	3.77858	0.77633	0.957459
unitig30_106	38.01	29.76	13.74	19.93		-0.893283	6.03148	0.183317	0.453414		-0.448822	6.27014	0.500962	0.830582		-1.66574	5.91839	0.0145748	0.0644026		0.415668	5.80575	0.535488	0.847365
unitig30_107	26.62	11.51	17.35	1846.82		6.15301	10.4533	5.56e-14	2.61e-11		-1.30451	4.8404	0.0573546	0.331311		-0.816334	5.05245	0.229149	0.414536		-7.48661	10.503	7.8e-18	8.26e-15
unitig30_108	267.86	86.22	41.5	3402.27		3.70451	10.7506	3.48e-07	2.39e-05		-1.73122	7.38534	0.010464	0.134646		-2.88844	7.23754	4.45e-05	0.00135776		-5.46463	10.7382	4.8e-12	1.3e-09
unitig30_109	702.13	253.6	96.05	1266.01		0.888111	8.50398	0.17881	0.447834		-1.5651	7.47767	0.0199315	0.18848		-3.06791	7.2691	1.69e-05	0.000665355		-2.48209	8.17971	0.000338124	0.00968336
unitig30_110	167.34	55.55	36.74	1883.07		3.52966	9.73252	1.03e-06	6.19e-05		-1.6867	6.53873	0.012945	0.150832		-2.38542	6.44985	0.000611958	0.00712188		-5.24529	9.71168	2.21e-11	4.93e-09
unitig30_111	4.93	4.41	11.45	6.93		0.579557	1.6783	0.587191	0.817503		-0.193308	1.3431	1	1		1.04979	2.08229	0.226004	0.410845		-0.802479	1.60679	0.371253	0.7459
unitig30_112	10.05	20.52	16.7	11.44		0.224436	4.52211	0.751932	0.910942		0.93349	5.01348	0.169521	0.542034		0.533949	4.81562	0.434324	0.623876		0.680277	5.06297	0.316791	0.704933
unitig30_113	141.21	146.63	84.16	136.35		-0.0127944	8.17062	0.985476	1		-0.0417828	8.22306	0.950167	1		-0.945439	7.89758	0.153357	0.319284		-0.0578269	8.19779	0.930547	1
unitig30_114	80.35	133.43	196.39	120.24		0.61926	7.9817	0.347583	0.63529		0.635585	8.05857	0.335001	0.71745		1.0904	8.40332	0.100183	0.240576		-0.0125158	8.31337	0.985582	1
unitig30_115	62.59	37.99	18.07	63.29		0.0539292	7.63181	0.936108	0.998253		-0.81611	7.31926	0.218126	0.60356		-1.99053	7.04295	0.00354415	0.024096		-0.898891	7.34008	0.174591	0.550393
unitig30_116	43.61	59.71	42.65	50.13		0.238597	6.95123	0.719624	0.896403		0.357074	7.08348	0.589385	0.869575		-0.231215	6.8334	0.729449	0.855411		0.0896409	7.17214	0.893286	0.995147
unitig30_117	64.82	100.3	30.27	122.5		0.955761	6.71024	0.151619	0.408912		0.533631	6.51318	0.421465	0.772763		-1.29668	5.75955	0.0551664	0.162005		-0.450986	6.96117	0.49424	0.826404
unitig30_118	3419.67	3319.68	3462.15	2978.97		-0.161361	12.9399	0.805023	0.935597		-0.138948	13.0175	0.831658	0.97505		-0.181102	13.0489	0.781746	0.889649		-0.0064275	12.9163	0.992185	1
unitig30_119	200.4	233.07	128.54	318.98		0.70817	7.28761	0.284669	0.571902		0.121764	7.01936	0.854518	0.984401		-0.839313	6.64689	0.20732	0.389187		-0.615257	7.38407	0.351983	0.73297
unitig30_120	777.71	660.08	369.25	533.36		-0.50643	9.39213	0.440324	0.719636		-0.332703	9.53334	0.611746	0.883312		-1.27348	9.24048	0.0553718	0.162439		0.144889	9.25372	0.825168	0.977767
unitig30_121	900.5	585.23	646.95	427.35		-1.03759	9.46085	0.116578	0.354048		-0.717841	9.64047	0.275017	0.670027		-0.675972	9.7078	0.303704	0.498158		0.290914	9.06646	0.657289	0.90951
unitig30_122	878.93	167.35	289.12	188.68		-2.18207	9.87999	0.00138853	0.0201372		-2.48893	9.89588	0.000311689	0.0195187		-1.80295	10.0744	0.00745903	0.0403329		-0.335697	8.31617	0.609342	0.88554
unitig30_123	9.92	5.88	10.83	8.52		-0.181227	5.18058	0.790442	0.927191		-0.851005	4.96678	0.215298	0.599247		-0.0727643	5.34975	0.923649	0.977351		-0.698655	4.8426	0.306074	0.696765
unitig30_124	230.43	158.59	123.23	218.46		-0.0392949	5.80136	0.955759	1		-0.634912	5.6023	0.347148	0.728196		-1.10136	5.48501	0.10354	0.246199		-0.624478	5.56457	0.350079	0.731458
unitig30_125	87.85	39.66	75.33	84.32		-0.0215189	6.53308	0.976598	1		-1.24314	6.11542	0.065453	0.353001		-0.420621	6.4656	0.5255	0.700337		-1.25051	6.0905	0.0630077	0.329905
unitig30_126	902.68	845.14	574.19	829.85		-0.0836739	10.7748	0.898318	0.981024		-0.19115	10.7905	0.770194	0.950597		-0.85159	10.5703	0.195893	0.376094		-0.136316	10.7282	0.834972	0.980117
unitig30_127	170.5	117.6	92.92	195.13		0.232239	5.49305	0.731131	0.899688		-0.631554	5.15384	0.35202	0.73022		-1.07382	5.04316	0.11787	0.268458		-0.892685	5.28557	0.187613	0.565574
unitig30_128	495.68	366.14	111.97	113.58		-2.08776	8.26509	0.00221539	0.0279406		-0.533094	8.78573	0.417234	0.769312		-2.34498	8.33692	0.000660436	0.00756384		1.52586	7.89299	0.0229452	0.182805
unitig30_129	187.58	273.48	305.85	130.1		-0.490258	9.57917	0.454887	0.72939		0.447744	10.1118	0.494569	0.827906		0.506378	10.1973	0.440012	0.629204		0.909166	9.90088	0.167885	0.540098
unitig30_130	22.32	71.09	169.4	100.24		2.20412	6.39804	0.00148604	0.0209407		1.5747	5.97347	0.0211774	0.19439		2.72443	6.95568	0.000111669	0.00246078		-0.658306	6.87723	0.320863	0.708137
unitig30_131	87.42	71.82	102.06	45.77		-0.895772	8.55818	0.174998	0.443711		-0.379565	8.82729	0.563131	0.856551		0.0245292	9.06847	0.970709	1		0.487376	8.36917	0.458379	0.801472
unitig30_132	0	18.81	0	0		NA	NA	NA	unitig30_132		3.36152	8.83e-10	9.34e-07	NA		NA	NA	unitig30_132	9.93672		2.99e-10	4.53e-08
unitig30_133	133.63	79.99	96.18	104.76		-0.313348	7.57534	0.634819	0.849405		-0.83627	7.43116	0.206394	0.58769		-0.673173	7.54327	0.308592	0.503479		-0.551767	7.22333	0.403716	0.765615
unitig30_134	74.31	110.26	83.01	131.26		0.858184	6.99426	0.196754	0.468748		0.472989	6.82512	0.47604	0.815755		-0.039322	6.60041	0.954717	0.997884		-0.414046	7.22785	0.531216	0.845609
unitig30_135	26.79	12.85	10.43	8.83		-1.56181	5.02343	0.023705	0.137123		-1.155	5.20378	0.0897249	0.403407		-1.55843	5.13744	0.0236804	0.0904265		0.378106	4.32177	0.587672	0.875043
unitig30_136	28.56	34.16	42.65	38.43		0.465546	5.63799	0.49188	0.756742		0.162128	5.53626	0.815004	0.96811		0.379341	5.70681	0.571568	0.73763		-0.332272	5.75324	0.622012	0.891305
unitig30_137	95.33	73.78	121.64	250.12		1.42905	7.53758	0.032902	0.16911		-0.465803	6.50483	0.482651	0.817865		0.152652	6.84979	0.818717	0.912146		-1.92374	7.47913	0.00468159	0.0654882
unitig30_138	409.79	498.98	304.8	513.21		0.362277	7.33741	0.583153	0.815777		0.187936	7.30873	0.77686	0.951961		-0.625842	6.98241	0.34621	0.541828		-0.203183	7.47037	0.758317	0.951771
unitig30_139	316.07	608.14	1013.48	418.53		0.442771	8.87312	0.500148	0.759883		0.848006	9.18718	0.198388	0.575359		1.48205	9.67659	0.0265056	0.0981554		0.376397	9.33993	0.565876	0.864253
unitig30_140	18.4	12.11	11.4	19.63		0.131616	5.39613	0.847306	0.957239		-0.698796	5.08398	0.306876	0.694041		-0.889162	5.0632	0.192377	0.370938		-0.859303	5.15394	0.205258	0.589221
unitig30_141	11.93	16.6	21.47	43.07		1.88888	6.96689	0.00567195	0.0543722		0.379494	6.00437	0.572054	0.862742		0.64807	6.21399	0.334084	0.529789		-1.53828	7.10642	0.0222513	0.180047
unitig30_142	802.62	778.9	533.48	640.95		-0.286817	9.64973	0.661597	0.865128		-0.139421	9.78489	0.831545	0.97505		-0.788166	9.56314	0.231217	0.417106		0.118558	9.62221	0.856488	0.984849
unitig30_143	40.18	76.16	138.19	90.89		1.21507	7.6637	0.0684229	0.261299		0.826293	7.47066	0.212592	0.595144		1.58304	8.04879	0.0185795	0.0766674		-0.417625	8.01333	0.52543	0.842166
unitig30_144	536.58	2891.46	4025.94	3363.82		2.68581	9.71667	0.000113903	0.00295414		2.3337	9.48449	0.000678284	0.0314493		2.70845	9.85476	0.000101073	0.00229714		-0.380951	10.3919	0.560766	0.861318
unitig30_145	37.79	30.82	19.84	30.56		-0.268626	5.45485	0.691523	0.881475		-0.390328	5.46637	0.56203	0.856211		-1.1281	5.23791	0.0960973	0.234211		-0.15053	5.30404	0.827376	0.978469
unitig30_146	622.44	1189.4	992.49	1307.34		1.1082	8.04032	0.0951665	0.313453		0.838007	7.92847	0.205043	0.586412		0.474146	7.75728	0.472086	0.657125		-0.299035	8.40953	0.648873	0.905063
unitig30_147	55.07	68.9	57.25	111.3		1.0528	7.42895	0.113426	0.348732		0.227151	6.99357	0.731352	0.934671		-0.142688	6.85669	0.830416	0.917621		-0.854509	7.55654	0.196751	0.577959
unitig30_148	18.83	6.83	5.62	9.83		-0.898961	4.87753	0.188399	0.457471		-1.55721	4.73948	0.0256718	0.215735		-1.9409	4.69711	0.00587279	0.0338713		-0.687121	4.12975	0.326118	0.712434
unitig30_149	39.63	71	41.55	80.47		1.05917	7.06366	0.11243	0.34731		0.744825	6.92623	0.262169	0.657288		-0.13084	6.49262	0.847494	0.92853		-0.343192	7.39602	0.602795	0.881928
unitig30_150	172.02	112.57	71.29	172.28		0.0398632	6.03582	0.957614	1		-0.707633	5.76905	0.293772	0.681642		-1.46884	5.57141	0.0311517	0.110305		-0.776363	5.78045	0.245937	0.638923
unitig30_151	27.47	22.17	32.3	28.09		0.0693821	2.73071	1	1		-0.40406	2.56701	0.624149	0.890729		0.0342147	2.82553	1	1		-0.502414	2.5875	0.528051	0.842725
unitig30_152	11.67	10.78	23.99	11.83		0.0580155	3.53805	0.948457	1		-0.210145	3.47029	0.786598	0.956296		0.840029	4.10751	0.234593	0.420779		-0.297019	3.48097	0.684869	0.924012
unitig30_153	10.85	8.56	16.96	7.87		-0.426292	4.58361	0.533228	0.782715		-0.438166	4.64332	0.52715	0.836829		0.444803	5.14065	0.518501	0.69681		-0.0406693	4.40022	0.962766	1
unitig30_154	358.09	1407.41	2068.35	849.32		1.2836	8.79327	0.0537294	0.228829		1.87843	9.30546	0.00546328	0.0936848		2.33108	9.72375	0.000685146	0.00773168		0.565992	9.66864	0.38847	0.758345
unitig30_155	56.94	85.55	103.65	40.57		-0.450985	6.33531	0.498512	0.759262		0.491224	6.87741	0.458149	0.801833		0.665314	7.03317	0.315337	0.510264		0.913407	6.68264	0.17011	0.544159
unitig30_156	5.08	8.53	27.43	5.6		0.179405	3.34708	0.825977	0.947704		0.650318	3.68236	0.387594	0.752405		2.23213	4.8705	0.00180882	0.0151042		0.442192	3.71697	0.537	0.848331
unitig30_157	34.37	48.59	24.63	24.54		-0.448093	4.99832	0.506639	0.765129		0.403291	5.48921	0.5498	0.848958		-0.678857	5.01931	0.320054	0.515538		0.822634	5.28878	0.223989	0.615081
unitig30_158	227.18	417.43	536.58	836.11		1.9174	8.83278	0.00464635	0.0468793		0.781497	8.08717	0.236628	0.629468		1.04094	8.30794	0.116294	0.266372		-1.16476	9.08714	0.0789663	0.376701
unitig30_159	109.6	52.13	30.04	68.87		-0.632578	7.72073	0.337731	0.626209		-1.16821	7.59961	0.0793107	0.385555		-2.06613	7.42723	0.00252735	0.0188418		-0.564475	7.1787	0.39258	0.759437
unitig30_160	7.69	8.03	19.31	2.92		-1.35671	2.92222	0.0731383	0.271929		-0.0340651	3.5033	0.973636	1		1.12765	4.24479	0.112926	0.261267		1.29464	2.96692	0.0913856	0.402175
unitig30_161	39.72	64.01	126.75	58.42		0.593587	4.22006	0.397004	0.684476		0.591813	4.28624	0.405065	0.758791		1.474	4.9272	0.0333509	0.11549		-0.030627	4.51905	0.977183	1
unitig30_162	3.07	6.02	4.98	7.66		1.35542	4.01573	0.0579376	0.237682		0.874528	3.75952	0.227749	0.61573		0.498553	3.57956	0.497893	0.679902		-0.509874	4.3422	0.464887	0.805668
unitig30_163	790.4	508.01	328.6	2653.6		1.78494	10.6436	0.00802675	0.0699651		-0.733833	9.23702	0.264803	0.658619		-1.46507	9.05466	0.0282889	0.102832		-2.54763	10.5659	0.000230022	0.00711642
unitig30_164	3.02	9.32	12.65	5.33		0.854341	2.87494	0.281613	0.570719		1.52612	3.4008	0.0401097	0.271467		1.86345	3.70564	0.012129	0.0566329		0.64299	3.61059	0.362605	0.741754
unitig30_165	97.62	96.53	82.28	282.89		1.57241	7.00999	0.019788	0.124023		-0.11218	6.0315	0.872608	0.991802		-0.445315	5.93083	0.506023	0.686275		-1.71349	7.03396	0.0112395	0.114659
unitig30_166	14.04	13	16.56	21		0.616865	3.49874	0.404472	0.692574		-0.207004	3.12114	0.799731	0.961108		0.0386149	3.29245	1	1		-0.852928	3.45227	0.232421	0.624846
unitig30_167	18.73	41.23	40.83	86.65		2.24137	3.6924	0.00330258	0.0370827		1.03823	2.88099	0.19698	0.574213		0.921846	2.8574	0.225552	0.410525		-1.23245	3.94511	0.0840242	0.384389
unitig30_168	39.65	37.66	52.44	54.47		0.495818	6.19101	0.457376	0.731037		-0.170226	5.90503	0.800426	0.961511		0.204361	6.14559	0.763897	0.876864		-0.694908	6.17094	0.297155	0.689631
unitig30_169	489.41	351.24	198.67	740.91		0.635895	8.17874	0.334536	0.623086		-0.574646	7.63329	0.383788	0.75112		-1.49936	7.3788	0.0257406	0.0962464		-1.23939	8.03291	0.0625004	0.32806
unitig30_170	19.05	25.39	26.74	41.74		1.1685	5.45948	0.0865518	0.29772		0.318027	4.99572	0.644628	0.901724		0.289645	5.03118	0.675305	0.817652		-0.879387	5.60754	0.189195	0.56649
unitig30_171	39.02	125.74	400.27	115.98		1.60843	6.04363	0.0185093	0.118828		1.59124	6.09862	0.0195648	0.187532		3.15886	7.45128	1.04e-05	0.000462168		-0.0460579	6.66545	0.945059	1
unitig30_172	13.81	27.13	76.88	19.4		0.527283	5.17376	0.437651	0.718557		0.877715	5.45784	0.194528	0.571271		2.27717	6.54816	0.00107921	0.0105		0.321605	5.63775	0.630436	0.895626
unitig30_173	21.09	42.76	77.47	68.58		1.73858	7.14485	0.0104201	0.082185		0.923472	6.631	0.166472	0.538804		1.67799	7.21762	0.0132061	0.0602367		-0.843974	7.46389	0.202351	0.584186
unitig30_174	594.42	1047.47	617.19	1074.65		0.891947	9.12092	0.176453	0.446012		0.721181	9.07925	0.273244	0.667054		-0.144678	8.65465	0.825899	0.915306		-0.199608	9.46447	0.760657	0.952457
unitig30_175	42.08	116.64	63.08	89.01		1.11825	7.07636	0.0941073	0.311736		1.37438	7.32348	0.0402705	0.271467		0.384808	6.73527	0.561881	0.729345		0.227285	7.70688	0.730214	0.938878
unitig30_176	15.07	9.07	9.17	11		-0.415317	4.26549	0.565439	0.806067		-0.827051	4.16376	0.238467	0.632253		-0.913838	4.18122	0.189181	0.366944		-0.440586	3.90689	0.527505	0.842725
unitig30_177	13.56	5.46	3.61	4.79		-1.45441	2.182	0.08217	0.289117		-1.40208	2.24707	0.0939796	0.412007		-2.09304	2.11483	0.0176996	0.0744121		0.0241996	1.4448	1	1
unitig30_178	67.15	30.34	39.16	83.12		0.345398	6.31279	0.606713	0.829923		-1.24194	5.70038	0.067563	0.358521		-0.976747	5.83614	0.147327	0.311857		-1.61625	5.94266	0.017634	0.1562
unitig30_179	37.72	86.95	244.46	76.82		1.06349	6.20472	0.113294	0.348578		1.10831	6.30253	0.0984963	0.42055		2.49681	7.42486	0.000338978	0.0048993		0.0159668	6.70518	0.982178	1
unitig30_180	789.96	336.63	274.39	253.39		-1.60253	7.84014	0.0171535	0.113292		-1.32662	7.98024	0.0469519	0.297327		-1.72424	7.9283	0.0106116	0.0517705		0.247089	7.02105	0.709146	0.932439
unitig30_181	17.89	30.35	36.59	15.84		-0.137981	5.13861	0.844259	0.955712		0.666222	5.64499	0.321907	0.709623		0.8332	5.80127	0.216602	0.400011		0.775425	5.56678	0.248699	0.641808
unitig30_182	67.77	54.75	54.28	86.94		0.396986	6.13885	0.553883	0.79712		-0.403711	5.80394	0.549103	0.848805		-0.518836	5.80588	0.437748	0.627658		-0.829568	6.0274	0.214853	0.602368
unitig30_183	249.95	324.09	410.74	420.58		0.788358	9.1108	0.231434	0.515897		0.278571	8.87632	0.671287	0.910048		0.517613	9.06366	0.430674	0.620978		-0.538631	9.26932	0.411889	0.771428
unitig30_184	275.71	329.41	368.33	395.6		0.558423	6.54915	0.399787	0.687732		0.160556	6.3922	0.813208	0.967064		0.218846	6.47465	0.74631	0.86637		-0.426718	6.6635	0.519416	0.841204
unitig30_185	408.38	401.69	257.66	340.25		-0.22556	6.38702	0.738247	0.904227		-0.119906	6.50334	0.860385	0.987531		-0.863085	6.24293	0.19683	0.377381		0.0768265	6.37119	0.910389	1
unitig30_186	20.53	29.65	18.79	21.78		0.123091	5.58364	0.859441	0.963834		0.43386	5.82108	0.51618	0.835519		-0.326647	5.48247	0.630097	0.785628		0.28195	5.85107	0.673902	0.918754
unitig30_187	14.88	35.75	33.67	32.6		1.1685	5.45948	0.0865518	0.29772		1.16764	5.5267	0.0845768	0.395034		0.978378	5.45057	0.147656	0.312297		-0.0297261	5.96591	0.966082	1
unitig30_188	15.29	21.88	18.22	9.3		-0.677928	4.10271	0.327087	0.615243		0.420689	4.69807	0.541259	0.844401		0.0540011	4.54921	0.947207	0.992897		1.07	4.42141	0.122379	0.46892
unitig30_189	29.47	38.71	33.94	19.52		-0.555821	3.90972	0.432247	0.714775		0.297058	4.38647	0.673707	0.910867		0.00475175	4.28193	1	1		0.824249	4.13973	0.233421	0.625779
unitig30_190	5.22	4.93	4.11	6		0.235167	2.33471	0.776274	0.921986		-0.179649	2.18776	0.87496	0.992741		-0.543151	2.07098	0.558636	0.727358		-0.443827	2.28209	0.614163	0.886884
unitig30_191	15.39	9.41	13.8	44.34		1.56118	3.91619	0.0320765	0.165775		-0.80314	2.6533	0.325787	0.711056		-0.355924	2.88707	0.688962	0.826872		-2.39392	3.77808	0.00119302	0.0246065
unitig30_192	50.73	38.7	44.01	269.31		2.44556	7.63641	0.000421732	0.00804908		-0.486551	5.79261	0.468602	0.810278		-0.403895	5.87882	0.546902	0.715966		-2.96103	7.6263	2.84e-05	0.00136183
unitig30_193	93.28	44.94	30.2	66.78		-0.445404	6.70897	0.501241	0.761234		-1.14878	6.51631	0.0858069	0.395822		-1.82619	6.3863	0.0075217	0.0405427		-0.732226	6.21269	0.272942	0.66682
unitig30_195	90.13	74.1	45.85	153.16		0.802495	7.44755	0.225234	0.507512		-0.378581	6.88032	0.565727	0.858394		-1.17386	6.63558	0.0794079	0.207611		-1.20994	7.37256	0.0694219	0.349875
unitig30_196	13.97	15.63	32.87	25.42		0.900011	4.15035	0.201441	0.475086		0.0659527	3.73129	0.932173	1		1.03413	4.3588	0.138078	0.2996		-0.863052	4.20738	0.213366	0.600299
unitig30_197	7.99	22.97	34.74	10.16		0.384279	5.13041	0.573591	0.81126		1.42648	5.87421	0.0360647	0.258245		1.92095	6.30048	0.0051772	0.0312399		1.01341	5.95776	0.129995	0.48111
unitig30_198	40.87	40.11	78.2	38.1		-0.0635489	6.16788	0.93123	0.99578		-0.123044	6.20546	0.857885	0.98652		0.737124	6.7333	0.26806	0.461732		-0.0883284	6.15395	0.899662	0.997848
unitig30_199	18.11	34.65	80.93	35.85		1.02217	5.78167	0.131436	0.376757		0.839405	5.72949	0.214914	0.599237		1.96002	6.58872	0.00427145	0.0271453		-0.211622	6.15713	0.751323	0.948519
unitig30_200	17.07	61.3	133.94	74.59		2.16283	5.02542	0.00227532	0.0282493		1.74628	4.76796	0.0128628	0.150821		2.77077	5.65502	0.000119124	0.00257819		-0.445509	5.57177	0.505633	0.833989
unitig30_201	36.39	110.53	212.89	229.63		2.69329	5.6315	0.000169285	0.00399805		1.50522	4.7512	0.0320452	0.246893		2.34773	5.462	0.000960786	0.00977375		-1.21706	5.98801	0.070454	0.353214
unitig30_202	8.99	19.47	8.51	13.6		0.633516	3.50876	0.404472	0.692574		1.01697	3.81982	0.158089	0.52805		-0.27705	3.13719	0.735	0.858569		0.354642	4.01548	0.626985	0.893513
unitig30_203	5.32	12.86	4.58	8.2		0.6601	2.91575	0.396923	0.684476		1.17467	3.31507	0.117888	0.457586		-0.412315	2.46688	0.644988	0.79536		0.485805	3.49403	0.506213	0.834695
unitig30_204	78.94	49.54	39.56	90.3		0.231727	7.86091	0.725277	0.896403		-0.768204	7.47271	0.245255	0.639738		-1.1954	7.37941	0.0730762	0.196507		-1.02878	7.60942	0.121077	0.467806
unitig30_205	13.11	19.43	35.11	22.72		0.829311	3.90074	0.244366	0.528855		0.470129	3.74961	0.533143	0.840318		1.2204	4.28138	0.0831004	0.214079		-0.388111	4.11681	0.585567	0.875043
unitig30_206	21.36	16.95	17.13	17.95		-0.212982	5.47432	0.754414	0.912267		-0.429364	5.44326	0.5267	0.836829		-0.516892	5.45685	0.441159	0.630525		-0.245217	5.30917	0.719607	0.934309
unitig30_207	92.7	100.24	117.52	124.89		0.467315	4.84077	0.499379	0.759262		0.0167108	4.66213	0.987925	1		0.143241	4.77872	0.853859	0.931873		-0.479484	4.89037	0.481564	0.817097
unitig30_208	281.72	314.69	379.81	471.31		0.78002	8.44628	0.236983	0.522884		0.0634892	8.10306	0.924003	1		0.232051	8.2431	0.724416	0.852065		-0.745377	8.52064	0.257842	0.649548
unitig30_209	47.9	41.29	35.68	44.94		-0.0543601	4.79759	0.944953	1		-0.310005	4.74229	0.655674	0.904744		-0.623379	4.65849	0.370208	0.564655		-0.284487	4.69559	0.674533	0.918754
unitig30_210	59.95	30.37	23.56	22.93		-1.34302	2.6295	0.092993	0.309793		-1.07362	2.7696	0.175242	0.550128		-1.53977	2.67068	0.0474936	0.146967		0.241173	2.05302	0.82277	0.975608
unitig30_211	22.63	27.86	39.44	55.28		1.32493	5.03495	0.0540463	0.229563		0.203191	4.39949	0.785629	0.956054		0.601594	4.67873	0.390613	0.58468		-1.15071	5.13533	0.0905469	0.401027
unitig30_212	30.06	17.65	14.67	32.64		0.15648	6.05464	0.815328	0.942006		-0.863503	5.66947	0.20098	0.579558		-1.23351	5.5973	0.0700001	0.19053		-1.04887	5.76043	0.119098	0.463968
unitig30_213	10.52	10.45	23.68	37.42		1.86479	3.93599	0.0108005	0.0839321		-0.104669	2.75144	0.956735	1		0.969342	3.42011	0.201563	0.382478		-1.99888	3.93626	0.00610072	0.0787151
unitig30_214	7.21	7.67	16.85	17.54		1.31962	4.45786	0.0625732	0.248851		-0.00708124	3.71751	1	1		1.02542	4.37659	0.149111	0.313126		-1.35577	4.49015	0.0500103	0.290766
unitig30_215	33.32	66.1	112.68	53.95		0.733048	6.7203	0.270544	0.560425		0.892127	6.88873	0.179816	0.555615		1.5588	7.40617	0.0207001	0.0824117		0.130238	7.16653	0.844668	0.982434
unitig30_216	18.67	15.13	29.29	22.22		0.288316	5.03748	0.672398	0.868911		-0.39891	4.76389	0.562272	0.856211		0.450491	5.24725	0.507464	0.686781		-0.716118	4.91806	0.294448	0.685871
unitig30_217	56.69	56.57	32.38	65.36		0.242998	6.63542	0.715765	0.89603		-0.0991338	6.52639	0.882476	0.996055		-1.00658	6.20611	0.132958	0.291234		-0.370978	6.63909	0.575348	0.87096
unitig30_218	142.88	255.17	189.73	208.44		0.582451	7.77357	0.377234	0.665476		0.740458	7.93734	0.262148	0.657288		0.21024	7.68025	0.75032	0.868684		0.129167	8.16273	0.844626	0.982434
unitig30_219	42.27	37.62	41.22	44.75		0.119784	6.21582	0.859215	0.963739		-0.264177	6.09443	0.69468	0.921277		-0.235108	6.15886	0.728863	0.855043		-0.412809	6.14376	0.536197	0.847538
unitig30_220	354.81	303.65	196.16	430.71		0.317227	5.72	0.637118	0.850738		-0.320594	5.46616	0.635696	0.898309		-1.05327	5.23116	0.122885	0.276393		-0.666691	5.63393	0.320554	0.708137
unitig30_221	40.78	66.85	116.82	70.16		0.820066	5.23929	0.230989	0.515306		0.616644	5.18027	0.36619	0.742308		1.31887	5.69531	0.0531416	0.157586		-0.232287	5.53367	0.730725	0.939251
unitig30_222	13.4	12.64	12.93	18.18		0.476661	4.13109	0.499108	0.759262		-0.180297	3.84933	0.812517	0.967064		-0.250416	3.86613	0.734757	0.858569		-0.685899	4.09782	0.325154	0.711922
unitig30_223	255.03	283.62	187.25	379.26		0.610106	6.9185	0.35777	0.646771		0.0571684	6.67684	0.933294	1		-0.644429	6.41087	0.333084	0.529274		-0.58179	6.98993	0.379458	0.751556
unitig30_224	22.85	21.02	20.94	26.13		0.230701	4.77987	0.747418	0.908006		-0.216301	4.62014	0.76724	0.950521		-0.324646	4.62067	0.63609	0.788859		-0.475875	4.72947	0.485547	0.820897
unitig30_225	133.55	64.3	48.89	85.12		-0.611713	5.62711	0.364394	0.653297		-1.14998	5.50057	0.0900778	0.403774		-1.64746	5.41077	0.016447	0.0702601		-0.567116	5.09959	0.403635	0.765615
unitig30_226	9.28	6.81	6.97	3.19		-1.48679	1.38187	0.14853	0.403487		-0.539228	1.74867	0.605363	0.881002		-0.608961	1.76406	0.544247	0.71473		0.921251	1.12448	0.335879	0.71991
unitig30_227	44.3	22.31	18.36	8.21		-2.38466	3.0454	0.00217481	0.0276928		-1.08322	3.4218	0.137938	0.495939		-1.46625	3.35016	0.0519005	0.155592		1.27404	2.32251	0.109441	0.443679
unitig30_228	19.48	31.72	46.09	31.42		0.726782	4.65213	0.291542	0.579587		0.606717	4.64594	0.383907	0.75112		1.04293	4.97609	0.130513	0.28858		-0.148931	4.94767	0.830496	0.979704
unitig30_229	1015.17	448.26	366.07	1255.61		0.344331	9.78961	0.59927	0.825082		-1.2754	9.17246	0.0550338	0.323823		-1.67036	9.11883	0.012897	0.0590174		-1.64858	9.41318	0.0140113	0.133604
unitig30_230	485.21	239.5	175.35	246.58		-0.938869	9.55157	0.154823	0.413299		-1.11469	9.56042	0.092278	0.407501		-1.6672	9.45868	0.013025	0.0595066		-0.204656	8.9713	0.755041	0.950084
unitig30_231	45.54	35.65	42.5	46.15		0.0568979	6.76732	0.934597	0.998253		-0.449242	6.59718	0.497018	0.828765		-0.298599	6.71427	0.654641	0.802677		-0.534988	6.61436	0.420774	0.77931
unitig30_232	45.93	38.12	43.61	45.78		0.0328402	6.38598	0.962955	1		-0.364787	6.26432	0.587273	0.867895		-0.273581	6.35622	0.682571	0.823394		-0.426475	6.26631	0.520621	0.841204
unitig30_233	15.32	10.13	5.64	10.89		-0.454504	5.54663	0.50195	0.7618		-0.692978	5.51549	0.304254	0.689958		-1.63992	5.26672	0.0174672	0.0736822		-0.267305	5.23889	0.69269	0.926724
unitig30_234	16.41	12.99	15.98	23.86		0.577409	4.88089	0.399906	0.687795		-0.433071	4.42574	0.544247	0.846562		-0.236586	4.56452	0.743962	0.86637		-1.03942	4.767	0.12607	0.473359
unitig30_235	19.2	8	5.35	7.54		-1.30872	4.25457	0.0622005	0.2484		-1.35698	4.30235	0.0541417	0.320978		-2.03969	4.18164	0.00457244	0.0284968		-0.0769802	3.50557	0.932173	1
unitig30_236	7.12	6.08	7.76	6.86		-0.0156983	4.32599	1	1		-0.322501	4.24503	0.659068	0.904972		-0.0736567	4.41329	0.927821	0.980156		-0.335655	4.21947	0.634827	0.897952
unitig30_237	466.65	158.21	370.72	132.09		-1.78305	8.52246	0.00821964	0.0711331		-1.65653	8.61858	0.0136949	0.154478		-0.530916	9.03191	0.41892	0.610568		0.097692	7.48566	0.883124	0.99423
unitig30_238	64.08	99.07	244.65	52.6		-0.247031	7.68005	0.708098	0.892331		0.53237	8.15605	0.418781	0.770652		1.7337	9.02957	0.0100314	0.050004		0.750572	8.03704	0.255158	0.647808
unitig30_239	28.21	137.86	164.93	158.26		2.52551	8.08029	0.000276657	0.00592187		2.1926	7.86962	0.00140682	0.0449269		2.34848	8.05004	0.000662445	0.00756418		-0.361769	8.73939	0.581442	0.873296
unitig30_240	23.73	35.37	30.29	62.1		1.42485	6.58789	0.0349269	0.175036		0.479233	6.03378	0.47389	0.814613		0.152774	5.90349	0.823307	0.913923		-0.974498	6.78182	0.143102	0.50608
unitig30_241	460.75	118.42	79.37	687.61		0.615279	9.55854	0.348954	0.636858		-2.05601	8.59502	0.00252506	0.0616745		-2.73602	8.53666	9.04e-05	0.00213512		-2.70014	9.10219	0.000105964	0.00383872
unitig30_242	117.56	72.88	73.92	67.11		-0.770366	4.53847	0.265151	0.554693		-0.785255	4.59684	0.254528	0.647448		-0.867474	4.61617	0.21073	0.393535		-0.0436615	4.15266	0.970738	1
unitig30_243	96.17	74.37	29.76	33.31		-1.49143	5.75068	0.0284969	0.153956		-0.466957	6.16572	0.486224	0.820451		-1.89036	5.76952	0.00616671	0.035019		0.99575	5.47287	0.138629	0.497906
unitig30_244	6.26	13.78	24.23	12.76		1.05996	2.69084	0.178922	0.447834		1.03786	2.74558	0.190766	0.566396		1.74815	3.29918	0.0222657	0.0868516		-0.0510978	3.10903	0.970542	1
unitig30_245	29.6	20.09	24.26	31.51		0.127925	6.77051	0.850197	0.959095		-0.654919	6.47974	0.325377	0.711056		-0.485841	6.59927	0.464369	0.650976		-0.811702	6.54507	0.222158	0.611441
unitig30_246	202.52	106.54	45.54	271.76		0.461946	8.55312	0.482169	0.749401		-1.0227	7.9471	0.12291	0.4699		-2.35152	7.67734	0.000660633	0.00756384		-1.5135	8.26079	0.0237903	0.187252
unitig30_247	529.73	2423.39	2595.43	2869.15		2.47479	8.94004	0.00034457	0.00696971		2.0974	8.69443	0.00210495	0.0556102		2.09357	8.74283	0.00213074	0.0167537		-0.406245	9.57348	0.535412	0.847365
unitig30_248	20.83	32.29	33.02	22.33		0.137569	3.77289	0.868977	0.968777		0.535347	4.06172	0.448556	0.794881		0.465221	4.07184	0.518908	0.697137		0.369022	4.08708	0.602535	0.881928
unitig30_249	1.67	6.12	5.01	3.66		1.08949	-0.520308	0.658385	0.863447		1.68115	-0.21501	0.430642	0.779749		1.30419	-0.354251	0.658385	0.804862		0.562538	-0.14224	0.769726	0.95465
unitig30_250	22.31	23.43	20.77	16		-0.442023	5.29607	0.515688	0.772801		-0.0252861	5.55491	0.973751	1		-0.301824	5.47425	0.659788	0.80588		0.387951	5.32895	0.567973	0.864865
unitig30_251	10.33	10.73	12.91	16.97		0.75151	2.81095	0.340697	0.628324		-0.0404718	2.43492	1	1		0.123108	2.56792	0.950626	0.994956		-0.821184	2.81334	0.274487	0.668053
unitig30_252	14.53	37.57	63.15	43.35		1.61339	5.11301	0.0202248	0.124718		1.27318	4.93481	0.0641399	0.349155		1.91958	5.46835	0.00586964	0.0338713		-0.369127	5.57908	0.582956	0.87495
unitig30_253	458.59	1780.51	2512.46	2554.73		2.51555	11.3953	0.000270277	0.00579997		1.86086	10.926	0.00582607	0.0971693		2.25489	11.2949	0.000977634	0.00989425		-0.683533	11.9233	0.297778	0.689976
unitig30_254	0	0.49	0.66	0.32		3.90658	-0.936891	0.52381	0.776031		4.40839	-0.728015	0.285714	0.674324		4.77919	-0.532028	0.285714	0.47943		0.407924	-0.556088	1	1
unitig30_255	38.41	18	21.21	111.41		1.57272	4.89847	0.0233802	0.136425		-1.1869	3.48977	0.103314	0.431267		-1.05325	3.58149	0.149617	0.313372		-2.78896	4.72035	0.000125687	0.00442096
unitig30_256	13.48	9.89	9.11	42.83		1.69987	3.20769	0.0239704	0.137964		-0.539812	1.96224	0.526087	0.836829		-0.76042	1.91778	0.351957	0.547188		-2.26968	3.10702	0.00330335	0.0496693
unitig30_257	280.14	158.78	137.79	207.45		-0.395652	8.43392	0.547151	0.791523		-0.915224	8.29839	0.166204	0.538554		-1.22246	8.25011	0.0660521	0.182074		-0.548414	8.03705	0.404682	0.767018
unitig30_258	26.9	19.6	19.91	49.82		0.926508	5.49968	0.172249	0.439314		-0.552279	4.77646	0.421574	0.772763		-0.632089	4.79419	0.352234	0.547261		-1.50774	5.37905	0.0274832	0.205808
unitig30_259	50.86	56.32	46.11	69.2		0.481855	6.86681	0.468523	0.739197		0.0508887	6.69805	0.94017	1		-0.340169	6.56267	0.610355	0.770114		-0.459815	6.93646	0.486729	0.822076
unitig30_260	25.33	30.95	11	11.71		-1.07471	5.79723	0.11189	0.346405		0.192985	6.40556	0.77215	0.950597		-1.40159	5.81413	0.0390583	0.128438		1.23895	5.97681	0.065788	0.339018
unitig30_261	3.02	1.66	5.67	2.21		-0.403289	0.0753787	0.769726	0.917838		-0.924831	-0.0497315	0.521739	0.835519		0.694994	0.641689	0.670342	0.81385		-0.551238	-0.263308	1	1
unitig30_262	1.18	2.17	4.15	1.01		-0.189785	0.576445	1	1		0.768712	1.10118	0.431875	0.780075		1.59322	1.67704	0.107412	0.252504		0.931804	0.967535	0.361697	0.741322
unitig30_263	0	0	3.79	0.74		NA	NA	NA	NA		NA	NA	unitig30_263	5.09057		0.161491	0.33046	NA	NA		NA
unitig30_264	1	0.24	3.5	0.97		-0.000739028	-0.0547165	1	1		-1.97678	-0.505911	0.430642	0.779749		1.57776	0.842996	0.187026	0.363845		-2.01964	-0.54971	0.430642	0.784786
unitig30_265	35.93	31.06	29.99	26.85		-0.382454	5.55012	0.567973	0.80818		-0.306311	5.64985	0.653952	0.904744		-0.459485	5.63352	0.495739	0.678145		0.0473291	5.43383	0.951162	1
unitig30_266	6.04	9.36	12.48	11.65		0.984122	4.78557	0.152473	0.410037		0.535198	4.57166	0.444994	0.790665		0.846821	4.81581	0.217711	0.401448		-0.477826	5.02491	0.481684	0.817137
unitig30_267	102.26	243.73	230.19	134.14		0.429116	7.57718	0.515421	0.772538		1.15677	8.10496	0.081799	0.392023		0.971502	8.03116	0.142543	0.305774		0.698822	8.22812	0.28883	0.680494
unitig30_268	25.03	81.98	150.6	55.82		1.19314	4.27261	0.0918784	0.30888		1.61352	4.64309	0.0217227	0.197254		2.38779	5.30626	0.000827639	0.0087881		0.391511	4.99698	0.568623	0.864923
unitig30_269	32.41	90.49	153.69	92.23		1.54619	6.61354	0.0223792	0.132597		1.38498	6.56306	0.0400723	0.271467		2.04633	7.11963	0.00283666	0.0204819		-0.190069	7.15362	0.773078	0.956693
unitig30_270	7.11	7.66	5.67	21.59		1.64013	4.56835	0.0202528	0.124718		0.0153159	3.60681	1	1		-0.510987	3.40961	0.501624	0.682461		-1.65394	4.60582	0.0181393	0.159509
unitig30_271	119.9	116.19	48.78	64.2		-0.862937	5.9529	0.197363	0.469266		-0.142009	6.31937	0.834225	0.97505		-1.49894	5.87129	0.0273566	0.100517		0.692147	5.91071	0.300413	0.692407
unitig30_272	315.34	1351.13	1786.85	884.5		1.52548	8.13912	0.0229125	0.134438		2.00288	8.57444	0.0032386	0.0721917		2.30335	8.87091	0.000801839	0.00862208		0.448553	9.01102	0.494256	0.826404
unitig30_273	34.95	24.39	26.73	23.54		-0.531779	4.17537	0.447261	0.722781		-0.61418	4.20539	0.383116	0.750953		-0.584935	4.26698	0.410148	0.602318		-0.111185	3.89965	0.895996	0.996182
unitig30_274	18.57	19.01	12.77	14.69		-0.299583	3.20126	0.716288	0.89603		-0.0618855	3.37756	0.942563	1		-0.736922	3.12584	0.320336	0.515894		0.209024	3.21355	0.808448	0.971674
unitig30_275	12.84	37.47	32.07	7.25		-0.785743	3.99015	0.269097	0.558861		1.44844	5.29829	0.0361667	0.258456		1.12131	5.11965	0.101676	0.242988		2.20567	5.09134	0.0017217	0.0315905
unitig30_276	27.5	29.92	21.43	14.45		-0.889485	5.0341	0.192945	0.463584		0.0254493	5.49323	0.979431	1		-0.558341	5.27611	0.412035	0.604585		0.886218	5.09965	0.189737	0.56649
unitig30_277	24.29	68.19	103.4	64.08		1.4361	5.23561	0.0376692	0.183358		1.39196	5.272	0.0434662	0.285964		1.8898	5.69816	0.00649075	0.0361383		-0.0730172	5.79468	0.914312	1
unitig30_278	5.29	7.54	8.91	7.91		0.61732	4.8015	0.373473	0.662549		0.415088	4.74946	0.546217	0.846667		0.553097	4.88162	0.415719	0.607573		-0.231098	5.01891	0.736569	0.941622
unitig30_279	3.95	3.96	1.58	2.18		-0.823064	3.64932	0.250907	0.538021		-0.0955567	4.02491	0.907334	1		-1.51915	3.53342	0.0387748	0.127754		0.698952	3.64438	0.31939	0.707124
unitig30_280	7.02	9.57	12.13	7.55		0.141543	4.53252	0.842471	0.954582		0.350686	4.71286	0.616537	0.886128		0.588994	4.90315	0.391018	0.584976		0.180338	4.75061	0.797547	0.967488
unitig30_281	57.98	98.66	171.3	177.91		1.65433	5.94556	0.0158113	0.108275		0.670254	5.33695	0.322278	0.710069		1.3633	5.85108	0.045437	0.142879		-1.01298	6.18167	0.129088	0.478317
unitig30_282	476.76	229.92	290.74	866.8		0.90001	7.7251	0.174378	0.442711		-1.14801	6.80798	0.0854875	0.395525		-0.912296	6.937	0.169721	0.341374		-2.0769	7.47358	0.00237532	0.0398725
unitig30_283	80.99	19.14	19.58	19.06		-2.04698	4.51775	0.00425521	0.0439826		-2.17415	4.55423	0.00249776	0.0612061		-2.24428	4.58946	0.00167348	0.0143702		-0.155848	3.1851	0.8604	0.986423
unitig30_284	46.59	7.84	9.74	6.14		-2.87102	2.84127	0.000488047	0.00907065		-2.65374	2.92081	0.000953685	0.0374419		-2.44621	2.9966	0.00179078	0.014998		0.189829	1.13126	1	1
unitig30_285	35.37	20.53	70.84	11.9		-1.53083	3.99578	0.0343126	0.173409		-0.879769	4.26067	0.204334	0.584745		0.802704	5.15123	0.243649	0.431416		0.622563	3.472	0.394019	0.759437
unitig30_286	126.16	728.88	887.11	241.55		0.974678	9.26175	0.140126	0.393088		2.43418	10.4393	0.000409387	0.0232279		2.61483	10.6445	0.000163307	0.00324398		1.43066	10.6158	0.0318277	0.226036
unitig30_287	153.83	134.45	179.42	68.89		-1.12099	6.89842	0.092938	0.309793		-0.290339	7.28236	0.662128	0.907038		0.0230228	7.48346	0.973854	1		0.801848	6.75265	0.226562	0.616753
unitig30_288	381.21	313.14	137.07	147.1		-1.33596	7.68685	0.0455159	0.206569		-0.379867	8.09534	0.563698	0.856951		-1.67438	7.71567	0.0130321	0.0595074		0.927275	7.47072	0.162055	0.532252
unitig30_289	8.82	34.18	65.83	11.04		0.36018	2.40241	0.679362	0.874135		1.8539	3.46159	0.0153924	0.163798		2.69594	4.19177	0.000410087	0.00544473		1.46529	3.48595	0.0444506	0.273194
unitig30_290	1072.34	1551.06	2110.08	1563.73		0.581864	9.77139	0.375459	0.663429		0.436267	9.75279	0.505829	0.834395		0.777543	10.0102	0.237343	0.424099		-0.174437	10.0107	0.789924	0.962926
unitig30_291	298.83	383.96	120.77	30.35		-3.26089	7.62201	5.59e-06	0.000276165		0.265492	8.68653	0.686055	0.917366		-1.50583	8.03276	0.0246247	0.0930707		3.49768	7.90346	1.4e-06	9.37e-05
unitig30_292	386.51	396.94	150.61	39.15		-3.26137	5.1264	1.22e-05	0.000531209		-0.0577	6.03056	0.938477	1		-1.55769	5.52477	0.0231312	0.0892834		3.17558	5.12931	1.88e-05	0.000965431
unitig30_293	10.22	4.78	7.67	3.49		-1.5049	2.73982	0.05613	0.23632		-1.18685	2.889	0.131459	0.482511		-0.611769	3.14685	0.422712	0.614091		0.289865	2.07828	0.768941	0.95465
unitig30_294	3.55	6.17	16.54	100.67		4.85592	5.88854	1.64e-09	2.24e-07		0.69782	2.53015	0.403125	0.756498		2.01571	3.50321	0.00825843	0.0435725		-4.18782	5.96346	4.18e-08	4.27e-06
unitig30_295	23.94	37.39	35.93	121.82		2.38087	4.34633	0.00120133	0.0179775		0.545561	3.10356	0.48798	0.822609		0.38555	3.06152	0.617172	0.775371		-1.86459	4.47426	0.00795142	0.0920823
unitig30_296	3.32	3.15	5.35	36.81		3.50382	5.45027	3.44e-06	0.000179452		-0.170635	2.8463	0.837983	0.976607		0.487787	3.24786	0.52051	0.698515		-3.704	5.47851	9.56e-07	6.81e-05
unitig30_297	14.44	6.53	11.98	8.41		-0.742383	4.4556	0.291457	0.579555		-1.23937	4.34834	0.0787559	0.384634		-0.468571	4.68049	0.504498	0.684935		-0.525844	3.8716	0.462518	0.804005
unitig30_298	6.82	12.51	14.93	9.55		0.518912	1.75543	0.605363	0.828882		0.773713	1.96975	0.413309	0.767017		0.925334	2.11551	0.301975	0.496503		0.22607	2.10471	0.828551	0.978852
unitig30_300	17.87	17.35	18.05	13.54		-0.362229	4.61155	0.594117	0.822945		-0.138885	4.77995	0.845202	0.979887		-0.184692	4.80872	0.80295	0.903239		0.194568	4.58343	0.784189	0.959799
unitig30_301	5.83	6.84	7.87	4.26		-0.410705	1.08012	0.763627	0.916201		0.133628	1.38096	1	1		0.232504	1.47879	0.804303	0.904162		0.516762	1.17691	0.701513	0.92845
unitig30_302	3.95	0.64	1.32	1.6		-1.24022	0.67734	0.305221	0.593388		-2.62612	0.430379	0.0279694	0.226055		-1.74553	0.617121	0.143889	0.307373		-1.41979	-0.260242	0.521739	0.841204
unitig30_303	2.69	2.56	2.62	2.99		0.186169	2.64779	0.816944	0.942268		-0.168079	2.53213	0.852572	0.983576		-0.238029	2.54692	0.801477	0.90206		-0.383186	2.60366	0.640815	0.900861
unitig30_304	74.58	51.6	47.01	69.08		-0.0728935	6.20677	0.916333	0.989008		-0.627463	6.0278	0.34829	0.729003		-0.864408	5.9891	0.196386	0.376784		-0.583423	5.96949	0.383364	0.755289
unitig30_305	2.32	1.71	1.6	2.19		-0.0463588	2.37033	1	1		-0.540365	2.20558	0.54165	0.844698		-0.734951	2.17177	0.427663	0.618952		-0.523011	2.16566	0.54051	0.850075
unitig30_306	5.17	7.69	8.25	3.4		-0.565949	2.83365	0.471443	0.740412		0.473749	3.41333	0.521287	0.835519		0.473095	3.46413	0.5345	0.70711		1.01136	3.17517	0.167512	0.539315
unitig30_307	121.83	64.96	51.74	40.22		-1.56088	7.24182	0.0205784	0.12608		-1.0031	7.47165	0.130949	0.482511		-1.43427	7.3923	0.0326168	0.113617		0.528979	6.61468	0.424805	0.782331
unitig30_308	166.06	92.7	55.01	75.13		-1.10616	5.94253	0.101347	0.325689		-0.936897	6.06447	0.161261	0.531016		-1.79215	5.87102	0.00911252	0.0466045		0.140472	5.42645	0.83531	0.980117
unitig30_309	50.08	64.63	40.52	126.36		1.37252	6.93432	0.041278	0.194173		0.271563	6.30032	0.685087	0.916557		-0.504416	5.97684	0.451416	0.638834		-1.12983	7.06454	0.0897594	0.399126
unitig30_310	21.59	40.05	49.54	81.6		1.94945	3.17432	0.0118916	0.0901439		0.792013	2.43936	0.345195	0.725941		0.995431	2.62092	0.212687	0.395622		-1.18687	3.37513	0.104897	0.43461
unitig30_311	138.6	145.73	116.12	170.72		0.338264	6.12501	0.615912	0.83615		-0.0237639	6.00032	0.975798	1		-0.453998	5.85247	0.499911	0.681544		-0.390879	6.16174	0.556666	0.857974
unitig30_312	22.61	37.75	49.37	15.57		-0.499816	4.44103	0.469075	0.73933		0.643193	5.09589	0.348741	0.729224		0.92738	5.3273	0.170206	0.342181		1.11433	4.89347	0.105613	0.436511
unitig30_313	21.4	24.02	32.6	70.34		1.75304	5.5006	0.0113251	0.0869102		0.0703156	4.47869	0.931734	1		0.407757	4.71386	0.561347	0.728816		-1.71171	5.56008	0.0126456	0.124792
unitig30_314	5.2	2.29	3.9	3.8		-0.405731	0.298706	0.7999	0.932887		-1.23958	0.0817751	0.372947	0.742308		-0.598633	0.307163	0.7999	0.901003		-0.864858	-0.136234	0.769726	0.95465
unitig30_315	37.11	14.26	11.27	19.2		-0.912491	4.72709	0.185223	0.455128		-1.47448	4.61528	0.035866	0.258245		-1.91587	4.55572	0.00726038	0.0395106		-0.590844	4.00935	0.392054	0.759437
unitig30_316	4.48	5.33	2.52	4.49		0.0430608	1.00848	1	1		0.155421	1.11788	1	1		-1.01022	0.683996	0.438083	0.627684		0.0839483	1.0817	1	1
unitig30_317	5.22	4.74	2.43	6.54		0.36018	2.40241	0.679362	0.874135		-0.233794	2.16228	0.809946	0.965902		-1.29534	1.79575	0.128197	0.284644		-0.623107	2.32938	0.460565	0.802331
unitig30_318	4.87	4.82	6.94	10.14		1.09107	2.78052	0.152461	0.410037		-0.109607	2.15627	0.93615	1		0.311245	2.42429	0.734719	0.858569		-1.23015	2.75562	0.0998133	0.423491
unitig30_319	37.32	41	60.43	87.25		1.26227	6.19221	0.0619641	0.247593		0.0394946	5.51414	0.959426	1		0.496054	5.81584	0.461328	0.647685		-1.25167	6.25148	0.0621001	0.326826
unitig30_320	0.83	0.76	0.78	0.45		-0.801835	-0.0465703	0.769726	0.917838		-0.2153	0.182485	1	1		-0.283678	0.193474	1	1		0.562538	-0.14224	0.769726	0.95465
unitig30_321	25.66	25.51	19.88	39.3		0.65056	3.09924	0.404264	0.692574		-0.104669	2.75144	0.956735	1		-0.56536	2.58932	0.505261	0.685533		-0.784337	3.08443	0.290081	0.682302
unitig30_322	35.21	11.13	8.98	12.78		-1.42308	5.66932	0.03701	0.181719		-1.75662	5.64944	0.0107721	0.136533		-2.16933	5.61309	0.0019021	0.0156219		-0.362364	4.6932	0.601402	0.880955
unitig30_323	108.97	81.08	53.48	85.24		-0.316678	7.28283	0.63226	0.848399		-0.522702	7.26102	0.428603	0.778224		-1.22572	7.06213	0.0668799	0.183687		-0.234862	7.06598	0.723411	0.936667
unitig30_324	43.58	58.86	66.28	59.71		0.491933	7.2788	0.45772	0.731037		0.337506	7.25743	0.610645	0.883312		0.405907	7.34743	0.537702	0.709974		-0.183269	7.476	0.781485	0.958237
unitig30_325	0	0	0	0		NA	NA	NA	NA		NA	NA	NA	NA		NA	NA	NA	NA
unitig30_326	8.61	7.41	19.38	5.74		-0.543967	2.09048	0.558636	0.800743		-0.310288	2.24892	0.708588	0.92659		0.968562	3.0111	0.215077	0.397897		0.20531	1.9727	0.816583	0.973736
unitig30_327	16.78	18.21	42.23	21.19		0.37354	3.54311	0.629284	0.845679		0.021593	3.41966	1	1		1.13097	4.13506	0.115333	0.26503		-0.380855	3.58695	0.590367	0.876723
unitig30_328	568.66	846.51	344.22	404.62		-0.453303	8.61708	0.490238	0.75514		0.477803	9.15169	0.466728	0.810043		-0.923109	8.55479	0.162401	0.331524		0.902273	8.95577	0.171509	0.546539
unitig30_329	921.44	2072.53	1850.13	738.72		-0.281168	8.96864	0.668273	0.868183		1.07327	9.80363	0.104703	0.433529		0.806731	9.67986	0.220547	0.404479		1.32561	9.69349	0.0462512	0.277474
unitig30_330	8.4	127.81	321.61	17.17		1.06559	2.76374	0.164267	0.42753		3.82509	5.06492	9.95e-07	0.000271308		5.05357	6.27137	4.1e-10	1.36e-07		2.73084	5.11551	0.000152868	0.00518346
unitig30_331	0.59	1.31	6.68	0.22		-1.29838	-0.700492	1	1		1.00544	0.0505251	0.769726	0.950521		3.23119	1.57163	0.00472911	0.0291371		2.29889	-0.272483	0.186957	0.565102
unitig30_332	33.21	59.6	133.49	64.96		1.00428	4.14518	0.15668	0.415928		0.746473	4.04744	0.293109	0.681418		1.80627	4.84149	0.0106762	0.0519512		-0.28672	4.46675	0.688266	0.924555
unitig30_333	72.2	50.76	58.23	65.91		-0.0938316	5.57953	0.897171	0.981024		-0.604229	5.41911	0.367122	0.742308		-0.508784	5.50889	0.446988	0.634704		-0.539254	5.34924	0.423203	0.781134
unitig30_334	128.02	54.92	59	147.7		0.243928	6.51091	0.713673	0.89475		-1.31668	5.93308	0.0517584	0.31396		-1.31595	5.98377	0.051877	0.155592		-1.58951	6.10251	0.0189856	0.163314
unitig30_335	8.66	6.05	0.93	2.41		-1.78992	1.57928	0.0625616	0.248851		-0.609853	1.99819	0.477216	0.815755		-3.35657	1.40014	0.00177411	0.0148878		1.15405	1.26378	0.270771	0.665505
unitig30_336	11.45	4.2	0	4.18		-1.39467	0.97413	0.183672	0.453414		-1.52011	0.979181	0.183672	0.560171		-6.93584	0.568186	0.00199604	0.0161588		-0.152999	0.276054	1	1
unitig30_337	12.83	10.48	4.16	7.88		-0.664753	3.89848	0.357594	0.64659		-0.387354	4.07782	0.588669	0.869124		-1.82077	3.64724	0.0127647	0.0587072		0.248708	3.72925	0.731872	0.939781
unitig30_338	12.74	10.61	3.88	10.81		-0.198376	2.88735	0.804884	0.935597		-0.35916	2.87525	0.655991	0.904744		-1.90532	2.40087	0.0224924	0.0873344		-0.189574	2.75427	0.851626	0.98464
unitig30_339	45.92	64.64	148.45	63.86		0.513202	5.09395	0.452547	0.726602		0.397037	5.09363	0.561749	0.856211		1.49325	5.8639	0.0289778	0.104794		-0.145016	5.31219	0.834852	0.980117
unitig30_340	22.06	35.19	74.47	23.09		0.103482	4.6889	0.893806	0.979572		0.577466	5.02101	0.400223	0.755499		1.55577	5.73173	0.0232344	0.0895368		0.445194	5.03585	0.517295	0.841204
unitig30_341	9.01	9.61	9.07	4.14		-1.0832	3.88584	0.131175	0.376757		-0.00350399	4.39774	1	1		-0.190709	4.35645	0.792102	0.896525		1.05118	3.93958	0.131006	0.48111
unitig30_342	184.09	161.75	160.53	86.04		-1.05945	7.55035	0.110536	0.344102		-0.282806	7.91774	0.667643	0.90926		-0.396443	7.91875	0.547134	0.715966		0.747828	7.41133	0.257684	0.649548
unitig30_343	110.25	152.88	146.4	82.87		-0.374067	7.38324	0.57115	0.810792		0.37546	7.82533	0.568818	0.860556		0.210206	7.78562	0.750176	0.868635		0.720703	7.65149	0.274983	0.669067
unitig30_344	278.93	237.83	158.42	288.29		0.0853355	7.72601	0.89801	0.981024		-0.326064	7.59532	0.621074	0.889623		-1.01492	7.37931	0.126712	0.282242		-0.440243	7.62666	0.503922	0.832862
unitig30_345	264.95	156.77	179.57	316.57		0.294414	6.48825	0.658229	0.863447		-0.852892	6.03321	0.20211	0.581532		-0.759831	6.1182	0.256158	0.447077		-1.17619	6.21721	0.0791722	0.377025
unitig30_346	33.55	127.02	96.82	52.09		0.672101	6.08218	0.316031	0.603578		1.82421	6.95593	0.00735714	0.112157		1.32982	6.63859	0.0485675	0.149292		1.12328	7.1044	0.0917115	0.402818
unitig30_347	1404.01	2086.06	871.97	767.54		-0.833538	9.62545	0.205734	0.480651		0.475084	10.3069	0.468615	0.810278		-0.886087	9.72491	0.178901	0.354294		1.27979	9.98932	0.0540143	0.303942
unitig30_349	1.5	3.84	13.76	11.21		2.90864	2.02872	0.00291167	0.0341445		1.24317	0.90897	0.283653	0.674324		2.97057	2.2119	0.00156555	0.0136929		-1.69702	2.18142	0.0378812	0.249664
unitig30_350	0	0	0	1.14		NA	NA	NA	NA		NA	NA	NA	NA		NA	NA	NA	NA
unitig30_351	9.02	26.97	55.04	30.83		1.80839	4.64359	0.0111761	0.0860601		1.48204	4.46888	0.0351521	0.256456		2.40807	5.24531	0.000756028	0.0082444		-0.3553	5.15428	0.602763	0.881928
unitig30_352	0.48	1.06	1.52	0.99		1.05369	0.988709	0.394643	0.682241		1.02694	1.03695	0.324544	0.710986		1.43913	1.34852	0.14853	0.312363		-0.056164	1.32015	1	1
unitig30_353	9.3	8.86	6.98	6.06		-0.578799	2.72096	0.438288	0.718557		-0.16715	2.96458	0.851626	0.983423		-0.611337	2.81402	0.434448	0.623876		0.38318	2.67789	0.655991	0.90951
unitig30_354	16.53	16.77	12.34	9.36		-0.781711	5.12089	0.253157	0.53955		-0.0751231	5.49066	0.917689	1		-0.619772	5.29889	0.362287	0.557729		0.677845	5.12302	0.316928	0.704933
unitig30_355	14.85	31.41	85.41	34.76		1.26427	5.97987	0.0612807	0.245908		0.984188	5.85601	0.145612	0.511002		2.32459	6.91666	0.00080542	0.00862208		-0.30895	6.38646	0.643775	0.90175
unitig30_356	27.49	5.33	4.03	5.54		-2.267	3.43613	0.00256732	0.0309213		-2.45494	3.45881	0.0015291	0.047179		-2.95772	3.43046	0.000163286	0.00324398		-0.216433	1.95062	0.87496	0.992639
unitig30_357	11.4	5.35	4.79	3		-1.87318	1.78959	0.0421466	0.196769		-1.17956	2.02389	0.163786	0.535646		-1.44007	1.98554	0.0874894	0.220517		0.666893	1.12674	0.597593	0.87902
unitig30_358	21	48.76	74.82	25.02		0.289741	4.57156	0.675377	0.871223		1.11831	5.15085	0.104271	0.432592		1.63288	5.57198	0.0177792	0.0745797		0.799795	5.21595	0.234843	0.627012
unitig30_359	259.48	192.88	61.02	202.73		-0.318351	8.83298	0.627659	0.844368		-0.524019	8.81176	0.425147	0.775688		-2.28703	8.36898	0.00087225	0.00913601		-0.234507	8.61515	0.720925	0.935683
unitig30_360	71.79	25.62	29.12	122.81		0.81185	5.97666	0.228213	0.510614		-1.58136	4.98778	0.0225242	0.201289		-1.49972	5.05878	0.0303642	0.108376		-2.42223	5.63004	0.000570358	0.0143045
unitig30_361	13.46	36.9	170.68	70.43		2.42251	4.80688	0.000833937	0.013708		1.35703	4.05342	0.0587607	0.333846		3.4629	5.83429	3.51e-06	0.000217646		-1.09454	5.153	0.107849	0.442086
unitig30_362	18.48	37.93	123.01	18.27		0.022908	5.8937	0.97924	1		0.942753	6.49653	0.159086	0.529631		2.53816	7.76542	0.000268189	0.00426553		0.89104	6.47803	0.181254	0.558926
unitig30_363	0.97	1.98	5.76	2.76		1.53236	2.024	0.0874894	0.299362		0.923097	1.69268	0.323905	0.710986		2.35376	2.76521	0.00580197	0.0337381		-0.638892	2.28509	0.447595	0.793745
unitig30_364	72.52	37.97	9.99	30.4		-1.21635	7.31251	0.068416	0.261299		-1.02923	7.43798	0.121629	0.467814		-3.06192	7.07363	1.77e-05	0.000685474		0.158299	6.72634	0.813351	0.973572
unitig30_365	207.04	215.39	222.3	268.72		0.413865	9.57371	0.527948	0.77802		-0.0390793	9.3994	0.952812	1		-0.0963161	9.4228	0.883397	0.952197		-0.481786	9.60717	0.462561	0.804005
unitig30_366	15.34	25.78	32.86	27.5		0.878372	4.03785	0.219626	0.499545		0.651804	3.96369	0.363456	0.739336		0.898688	4.17105	0.201441	0.382455		-0.255474	4.33092	0.719314	0.934309
unitig30_367	1168.6	507.71	315.16	296.04		-1.9432	10.4561	0.00408601	0.0428626		-1.29881	10.6816	0.0505735	0.309608		-2.08948	10.5452	0.00212234	0.0167414		0.615554	9.58282	0.348588	0.730707
unitig30_368	16.17	10.08	18.8	7.09		-1.1434	1.6903	0.195166	0.466303		-0.772405	1.86949	0.392904	0.752977		0.0188037	2.26825	1	1		0.34331	1.31587	0.814851	0.973572
unitig30_369	13.54	24.83	27.58	15.54		0.234618	1.80035	0.84052	0.954261		0.774433	2.17148	0.373174	0.742308		0.822781	2.25286	0.356891	0.551949		0.511356	2.19821	0.54051	0.850075
unitig30_370	5.43	2.76	4.6	4.27		-0.307945	2.9096	0.695557	0.883819		-1.06952	2.66812	0.165578	0.537686		-0.438045	2.96113	0.564915	0.731828		-0.790646	2.47791	0.338539	0.722626
unitig30_371	73.32	58.85	108.73	105.76		0.566146	7.67896	0.390878	0.680979		-0.413241	7.24254	0.531067	0.839185		0.369504	7.68311	0.575308	0.740521		-1.00824	7.57785	0.128087	0.476513
unitig30_372	2057.81	664.97	885.68	145.83		-3.78093	10.7345	2.18e-07	1.63e-05		-1.72586	11.0813	0.0102144	0.132654		-1.41516	11.211	0.0336273	0.11602		2.02624	9.2587	0.00285047	0.0457659
unitig30_373	6.76	8.12	14.24	5.44		-0.273228	3.47757	0.711589	0.893947		0.16845	3.76123	0.823703	0.97094		0.876256	4.23101	0.213741	0.39628		0.413009	3.61523	0.578742	0.873296
unitig30_374	11.1	14.01	29.33	12		0.149187	2.52407	0.900018	0.981704		0.238368	2.6354	0.76926	0.950521		1.19899	3.27905	0.110654	0.257627		0.0604388	2.66641	0.960626	1
unitig30_375	15.82	23.71	46.95	43.69		1.49924	3.25234	0.0476942	0.213024		0.486056	2.66155	0.561338	0.856211		1.36707	3.2821	0.0719402	0.19481		-1.04246	3.40435	0.14298	0.50608
unitig30_376	72	57.6	25.6	84.89		0.275361	6.87742	0.678761	0.873855		-0.417984	6.60502	0.530856	0.839008		-1.68984	6.23526	0.0129789	0.0593282		-0.722199	6.75327	0.275463	0.669468
unitig30_377	0	1.99	0	1.98		4.45912	-0.718097	0.285714	0.571902		4.40839	-0.728015	0.285714	0.674324		NA	NA	NA	unitig30_377		-0.402416	1	1
unitig30_378	2.81	3.09	2.46	2.62		-0.0617902	1.97983	1	1		0.0415846	2.09138	1	1		-0.38853	1.93344	0.71239	0.843298		0.0747676	2.02896	0.94052	1
unitig30_379	0.68	1.73	2.79	3.21		2.22514	0.702708	0.0729734	0.271802		1.22286	0.162105	0.585507	0.867895		1.79617	0.541844	0.251568	0.441063		-1.03543	0.86876	0.361697	0.741322
unitig30_380	84.64	80.52	91.79	112.52		0.448061	4.96968	0.513079	0.77094		-0.167965	4.7114	0.814161	0.967653		-0.0819256	4.80379	0.922505	0.977351		-0.644917	4.94536	0.340919	0.72394
unitig30_381	34.7	23.6	25.89	32.05		-0.0767968	6.20875	0.912269	0.987995		-0.652236	6.02192	0.330691	0.714512		-0.620984	6.08512	0.35264	0.547261		-0.604294	5.96118	0.365705	0.744481
unitig30_382	3.25	5.26	12.71	3.63		0.220411	2.12177	0.870304	0.969361		0.606062	2.4026	0.489124	0.823715		1.78095	3.25037	0.0224182	0.0871657		0.357055	2.43926	0.688885	0.924555
unitig30_383	24.41	15.52	15.23	13.15		-0.851743	5.31246	0.209333	0.48592		-0.74786	5.41594	0.270891	0.665537		-0.879406	5.4179	0.192527	0.371142		0.0750951	4.93153	0.91397	1
unitig30_384	91.68	95.1	125.89	62.83		-0.508296	6.18935	0.444342	0.721178		-0.0434802	6.46689	0.950937	1		0.256642	6.67427	0.699137	0.834911		0.436008	6.21091	0.512825	0.839394
unitig30_385	3.87	3.27	4.25	4.42		0.261416	2.83165	0.758903	0.91438		-0.31954	2.60495	0.721106	0.931553		-0.0283155	2.79356	1	1		-0.609992	2.72884	0.41793	0.775907
unitig30_386	72.53	71.62	89.35	233.1		1.71517	5.56803	0.0130154	0.0954427		-0.124618	4.47715	0.863404	0.989079		0.0962859	4.63917	0.888595	0.955009		-1.86879	5.58421	0.00659995	0.0819635
unitig30_387	2.44	3.36	2.28	4.01		0.772274	2.10318	0.354733	0.64293		0.347695	1.92319	0.71239	0.927973		-0.330639	1.63158	0.824298	0.913923		-0.453772	2.23634	0.603651	0.882419
unitig30_388	22.66	16.01	10.14	42.3		0.941723	5.42197	0.164878	0.428146		-0.594334	4.67142	0.38702	0.752405		-1.35217	4.45731	0.0520577	0.155952		-1.56503	5.29137	0.0228101	0.182244
unitig30_389	12.16	29.04	45.09	30.63		1.34599	3.2579	0.0719402	0.270335		1.14963	3.19266	0.123931	0.470247		1.6696	3.61553	0.0237739	0.0905286		-0.225385	3.68937	0.763994	0.952781
unitig30_390	0.46	0.74	1.35	0.83		0.87151	-0.0628363	0.726708	0.896403		0.437772	-0.204245	1	1		1.34406	0.273265	0.442579	0.630853		-0.465075	-0.0222201	1	1
unitig30_391	48.84	49.59	53.58	51.75		0.125175	5.34807	0.857002	0.962146		-0.0719259	5.31442	0.922645	1		-0.0618394	5.37036	0.932292	0.982921		-0.225943	5.36028	0.740676	0.943294
unitig30_392	0	0.19	0.6	0		NA	NA	NA	NA		NA	NA	unitig30_392	4.77919		0.285714	0.47943	NA	NA		NA
unitig30_393	2.22	2.39	2.4	2.92		0.574087	0.723733	0.700311	0.887262		0.132355	0.563296	1	1		0.063473	0.573904	1	1		-0.471502	0.738328	0.745855	0.945937
unitig30_394	213.58	92.61	21.81	16.53		-3.65463	7.16678	6.38e-07	4.15e-05		-1.30112	7.61618	0.0511588	0.312272		-3.48525	7.29646	1.61e-06	0.000117404		2.32489	6.06095	0.000862875	0.0193508
unitig30_395	24.37	12.86	6.96	4.98		-2.25244	5.10928	0.00143616	0.0203234		-1.01568	5.48376	0.133468	0.487058		-2.00803	5.2684	0.00400921	0.0260703		1.20823	4.3935	0.0794652	0.377195
unitig30_396	8.54	9.08	3.47	8.71		0.0770882	3.54784	0.923308	0.992318		0.00573628	3.57623	1	1		-1.45675	3.04728	0.0565714	0.164268		-0.100169	3.59015	0.914571	1
unitig30_397	32.79	15.09	10.94	74.99		1.23404	6.21958	0.0675443	0.259427		-1.20968	5.05334	0.0768728	0.380494		-1.78169	4.94854	0.0104446	0.0513335		-2.47272	6.00366	0.000430447	0.0116578
unitig30_398	2.22	0.98	3.33	1.3		-0.717673	0.195257	0.585507	0.816474		-1.23958	0.0817751	0.372947	0.742308		0.38004	0.726216	0.840166	0.923595		-0.551238	-0.263308	1	1
unitig30_399	92.23	165.99	184.26	64.22		-0.4838	3.93972	0.504583	0.763466		0.750996	4.65474	0.277162	0.672153		0.798862	4.73665	0.251878	0.441515		1.20619	4.46302	0.0834158	0.383909
unitig30_400	22.6	26.28	31.22	47.9		1.12045	4.76092	0.106139	0.335857		0.121525	4.22422	0.870482	0.990369		0.267187	4.35365	0.719201	0.848165		-1.02789	4.83843	0.132595	0.483859
unitig30_401	16.77	7.85	16.87	9.64		-0.758662	2.98114	0.325362	0.6135		-1.18685	2.889	0.131459	0.482511		-0.190253	3.33506	0.823077	0.913883		-0.457027	2.43237	0.561338	0.861728
unitig30_402	9.99	4.07	9.16	8.51		-0.192187	1.9186	0.85396	0.960996		-1.37804	1.52871	0.14827	0.512309		-0.321884	1.96347	0.786774	0.893095		-1.21579	1.41764	0.171886	0.546539
unitig30_403	8.34	3.73	5.58	2.78		-1.54062	2.70037	0.0496316	0.218674		-1.25492	2.83735	0.10529	0.43548		-0.777168	3.05057	0.300655	0.495581		0.257527	1.99941	0.761112	0.952457
unitig30_404	55.57	29.39	22.95	16.83		-1.68424	5.1149	0.0146949	0.102937		-1.01463	5.37162	0.135534	0.49182		-1.47387	5.28232	0.0309747	0.109835		0.640937	4.47475	0.354204	0.734867
unitig30_405	23.46	18.44	11.16	4.28		-2.40984	3.77169	0.00134499	0.0196146		-0.443139	4.39618	0.523886	0.835519		-1.26918	4.14176	0.0721704	0.19506		1.93886	3.48863	0.00942415	0.102421
unitig30_406	36	22.42	13.38	20.95		-0.742353	5.12219	0.27288	0.561321		-0.778718	5.17342	0.251131	0.64442		-1.62564	4.95951	0.0184993	0.0763738		-0.0651631	4.74024	0.941131	1
unitig30_407	6.23	4.57	1.87	4.55		-0.405731	0.298706	0.7999	0.932887		-0.530053	0.2953	0.7999	0.961108		-1.85841	-0.0257821	0.186957	0.363845		-0.152378	0.0832863	1	1
unitig30_408	26.86	21	21.5	41.04		0.656527	4.37258	0.349682	0.637739		-0.45168	3.86053	0.532612	0.83997		-0.5218	3.87993	0.465778	0.652073		-1.13722	4.2545	0.104457	0.433797
unitig30_409	66.97	157.68	237.19	297.99		2.18393	5.67494	0.00180511	0.0243029		1.13504	4.95504	0.100932	0.426174		1.61717	5.35278	0.0198789	0.0805024		-1.07783	5.99712	0.108376	0.443177
unitig30_410	335.49	416.65	446.97	359.35		0.136787	7.82	0.836213	0.952507		0.216387	7.92912	0.742783	0.94098		0.214969	7.97971	0.744376	0.86637		0.0507622	7.97424	0.93932	1
unitig30_411	22.98	34.43	16.75	27.57		0.300197	5.01382	0.667388	0.868183		0.487142	5.18698	0.473848	0.814613		-0.654608	4.67697	0.3442	0.539457		0.158121	5.29359	0.819829	0.975258
unitig30_412	12.85	18.31	9.78	11.16		-0.166501	3.77122	0.825868	0.947704		0.413888	4.14139	0.55664	0.852816		-0.591566	3.69542	0.407672	0.599842		0.551693	4.04435	0.437936	0.787548
unitig30_413	44.35	23.52	20.32	32.63		-0.404849	5.58956	0.551199	0.794634		-1.01083	5.42219	0.137041	0.494471		-1.32454	5.37379	0.0513483	0.154646		-0.634838	5.15488	0.34897	0.730782
unitig30_414	53.34	51.36	42.02	31.36		-0.728488	6.03876	0.277151	0.566109		-0.150788	6.35157	0.82288	0.970337		-0.54282	6.22887	0.413265	0.606138		0.548906	5.9943	0.411895	0.771428
unitig30_415	10.15	7.93	4.85	7.8		-0.342202	3.84496	0.636526	0.850728		-0.45168	3.86053	0.532612	0.83997		-1.26285	3.60853	0.0785687	0.206072		-0.13827	3.6618	0.878028	0.993094
unitig30_416	12.62	52.86	81.13	21.23		0.787434	5.44763	0.244297	0.528855		1.96956	6.36269	0.00425493	0.0823294		2.48479	6.83662	0.000375236	0.00521032		1.15331	6.52994	0.0850279	0.386478
unitig30_417	25.66	124.33	202.16	81.12		1.69681	5.06798	0.0148619	0.103763		2.17897	5.51509	0.00192406	0.0538608		2.77734	6.06924	0.000106135	0.00236961		0.453277	5.96929	0.494742	0.826404
unitig30_418	27.4	128.68	195.79	151.6		2.50462	6.50371	0.000359838	0.00719954		2.13441	6.26521	0.00208319	0.0553472		2.6371	6.7363	0.000182013	0.00340132		-0.399106	7.13819	0.544234	0.850975
unitig30_419	5.58	4.52	6.93	13.5		1.30801	3.43545	0.081765	0.28888		-0.399511	2.52274	0.614163	0.884369		0.113238	2.82038	0.916668	0.973952		-1.73699	3.35159	0.0183609	0.160267
unitig30_420	2.88	3.65	5.7	3.44		0.292118	1.52211	0.814851	0.941807		0.24328	1.55715	0.814851	0.96811		0.779776	1.91193	0.392904	0.58697		-0.0776567	1.63367	1	1
unitig30_422	7.07	21.44	50.94	15.49		1.16347	2.44265	0.171981	0.439136		1.49785	2.74366	0.0540956	0.320978		2.6417	3.68455	0.000702647	0.00787485		0.305437	3.06375	0.704296	0.930101
unitig30_423	2.47	2.1	6.53	3.6		0.581502	2.39411	0.489124	0.754155		-0.329657	1.98534	0.723661	0.931553		1.20056	2.90726	0.131434	0.28858		-0.940547	2.28959	0.249994	0.642629
unitig30_424	290.67	284.8	373.9	368.23		0.378923	9.79882	0.563166	0.804048		-0.125537	9.60237	0.848198	0.981616		0.164358	9.79973	0.801976	0.902383		-0.533301	9.79598	0.416238	0.774528
unitig30_425	1.94	3.54	1.53	5.06		1.14127	0.47	0.497906	0.759262		0.443951	0.172276	1	1		-0.5892	-0.182468	0.726708	0.852987		-0.728638	0.528124	0.700311	0.92845
unitig30_426	28.6	91.22	108.98	91.52		1.71566	7.60047	0.0111715	0.0860601		1.57712	7.56294	0.0191437	0.186024		1.731	7.73107	0.0104118	0.0512676		-0.167388	8.19513	0.799221	0.967513
unitig30_427	25.18	29.6	22.11	28.21		0.201505	5.86689	0.765097	0.917446		0.136923	5.89926	0.845195	0.979887		-0.386138	5.69823	0.570244	0.736384		-0.0934195	5.97799	0.891102	0.994985
unitig30_428	24.82	15.35	13.08	17.08		-0.501245	4.41709	0.474777	0.743313		-0.788701	4.36687	0.253263	0.646268		-1.12146	4.29923	0.107314	0.252482		-0.316281	4.06362	0.667588	0.917074
unitig30_429	96.26	44.44	57.22	88.94		-0.0764383	5.96876	0.911446	0.987995		-1.2105	5.58661	0.0749094	0.374281		-0.948771	5.72245	0.158048	0.326089		-1.16295	5.52487	0.0863699	0.389453
unitig30_430	65.5	134.53	176.91	97.85		0.616495	5.51524	0.360053	0.649509		0.941879	5.78784	0.164082	0.536409		1.23416	6.03787	0.0679101	0.186018		0.29655	6.00229	0.658663	0.90951
unitig30_431	4.53	9.81	22.62	8.61		0.958962	2.69447	0.221621	0.502287		1.01387	2.79901	0.18837	0.564359		2.11451	3.65057	0.00509672	0.0309303		0.0259614	3.12014	1	1
unitig30_432	200.61	382.14	656.91	744.25		1.92899	9.78736	0.00437069	0.0448232		0.833539	9.06537	0.206138	0.58769		1.51232	9.5864	0.0236987	0.0904451		-1.12429	10.0574	0.0893929	0.398414
unitig30_433	12.84	17.35	9.29	13.82		0.143368	3.65801	0.85848	0.963298		0.337672	3.82958	0.649611	0.903704		-0.663441	3.39645	0.366683	0.561744		0.165525	3.86399	0.840616	0.981123
unitig30_434	7.95	13.12	5.47	3.87		-0.994363	1.97936	0.252505	0.539125		0.624631	2.80113	0.423254	0.774602		-0.734951	2.17177	0.427663	0.618952		1.5916	2.46109	0.0474936	0.282246
unitig30_435	5.83	5.09	5.21	2.03		-1.47306	1.65808	0.0915827	0.308253		-0.29005	2.13631	0.809946	0.965902		-0.359908	2.15116	0.688138	0.826872		1.15637	1.54759	0.21793	0.604504
unitig30_436	8.85	36.2	46.54	17.75		1.04109	4.72456	0.130646	0.376757		1.93538	5.44567	0.00562938	0.0951816		2.19512	5.70559	0.00173047	0.014652		0.865457	5.69485	0.1977	0.580099
unitig30_437	31.16	30.76	22.51	65.46		1.10751	4.73476	0.110452	0.343966		-0.114662	4.08717	0.875731	0.9932		-0.666785	3.89202	0.35192	0.547188		-1.25117	4.73843	0.0683132	0.346346
unitig30_438	3.88	3.43	3.45	2.89		-0.38569	3.19159	0.598935	0.825063		-0.274585	3.30419	0.734964	0.936173		-0.369252	3.30995	0.648527	0.797892		0.082414	3.09374	0.940623	1
unitig30_439	19.08	48.6	91.66	62.51		1.74816	5.03037	0.0127837	0.0940701		1.25153	4.73578	0.0714352	0.365048		2.06382	5.39814	0.00339578	0.0234036		-0.525557	5.46071	0.43549	0.786294
unitig30_440	53.3	142.72	204.98	104.67		1.01068	5.01045	0.139573	0.392055		1.32409	5.29413	0.0540086	0.320978		1.74355	5.65586	0.0116319	0.0550972		0.284553	5.62773	0.671645	0.91779
unitig30_441	3.17	17.97	18.38	13.05		2.0683	2.67955	0.0121395	0.0910729		2.39604	3.0104	0.00357069	0.0753674		2.32625	3.00974	0.0042334	0.0269439		0.298497	3.50738	0.669732	0.917451
unitig30_442	21.01	40.02	58.27	2.54		-3.00276	4.37819	7.48e-05	0.00218778		0.833169	5.76552	0.216053	0.600629		1.27218	6.11276	0.0595867	0.169358		3.80817	5.19198	6.86e-07	5.01e-05
unitig30_443	24.64	29.33	33.63	13.5		-0.830201	4.91752	0.22526	0.507512		0.154851	5.4226	0.821567	0.970337		0.249771	5.52486	0.714429	0.844741		0.956344	5.06645	0.159819	0.527975
unitig30_444	9.07	1.25	2.13	1.66		-2.39508	2.01903	0.0081583	0.0707471		-2.92755	1.98098	0.00212562	0.0556346		-2.27425	2.12198	0.0100416	0.0500252		-0.561049	0.448788	0.840166	0.981123
unitig30_445	60.34	49.18	55.72	39.29		-0.580893	5.90864	0.387246	0.67718		-0.391013	6.05427	0.557831	0.853557		-0.313713	6.13948	0.638927	0.790892		0.16107	5.73663	0.812728	0.973572
unitig30_446	93.02	69.09	82.88	129.07		0.509622	4.33873	0.471786	0.740752		-0.52442	3.8836	0.471039	0.811692		-0.364932	4.00252	0.616398	0.774629		-1.06304	4.18736	0.130838	0.48111
unitig30_447	3.22	3.93	6.44	3.13		-0.000739028	-0.0547165	1	1		0.187858	0.0609004	1	1		0.781917	0.379866	0.63315	0.787054		0.161242	-0.0251669	1	1
unitig30_448	8.97	21.05	15.34	4.45		-0.966289	2.04339	0.271828	0.560425		1.13174	3.18058	0.123931	0.470247		0.573792	2.87739	0.471443	0.656769		2.07066	2.90119	0.00783083	0.0913003
unitig30_449	114.26	260.83	161.85	91.04		-0.290022	7.67371	0.660098	0.864621		1.09463	8.52733	0.0987741	0.420712		0.303445	8.08961	0.644831	0.795282		1.35583	8.41506	0.0419873	0.26404
unitig30_450	6.84	32.41	34.14	9.22		0.467077	2.75096	0.548796	0.793175		2.14437	3.98151	0.00391859	0.0793039		2.1166	4.01306	0.00463062	0.028697		1.64875	4.02367	0.0215402	0.176934
unitig30_451	7.55	82.78	38.85	61.84		3.06786	5.54889	2.88e-05	0.00106816		3.35496	5.87388	5.97e-06	0.0011747		2.1613	4.90398	0.00248819	0.0186318		0.258132	6.5665	0.698567	0.92845
unitig30_452	3.88	3.8	33	8.5		1.14127	0.47	0.497906	0.759262		-0.123721	-0.060366	1	1		2.84877	1.75686	0.0057595	0.0335371		-1.29818	0.370433	0.390133	0.758345
unitig30_453	85.41	71.29	118.09	57.28		-0.538692	7.1464	0.415692	0.703357		-0.356843	7.29009	0.589133	0.869354		0.268406	7.64993	0.684298	0.824422		0.153021	6.99393	0.817879	0.97406
unitig30_454	532.16	784.04	415.09	350.55		-0.564569	9.6289	0.389772	0.679909		0.462918	10.2007	0.480075	0.816775		-0.55735	9.75	0.395772	0.589075		0.998651	9.96578	0.13043	0.48111
unitig30_455	80.02	57.61	53.66	54.66		-0.512096	6.23845	0.444296	0.721178		-0.569886	6.28091	0.394041	0.752977		-0.775171	6.25198	0.247127	0.436238		-0.0866164	5.98128	0.899674	0.997848
unitig30_456	193.3	137.81	207.61	111.62		-0.754424	8.34191	0.252584	0.539155		-0.584227	8.47443	0.374544	0.742308		-0.0958292	8.74167	0.884342	0.952387		0.141363	8.05151	0.830198	0.979704
unitig30_457	17.33	19.98	48.3	9.76		-0.786992	2.56344	0.32241	0.610932		0.108626	3.0265	0.891888	0.998589		1.27732	3.7965	0.0826872	0.213392		0.867437	2.68677	0.27538	0.669457
unitig30_458	18.16	27.1	54.03	10.52		-0.748409	3.27858	0.318426	0.607192		0.480799	3.93598	0.499736	0.830165		1.37263	4.56907	0.0504495	0.152699		1.2008	3.64361	0.0965983	0.415291
unitig30_459	24.62	59.86	108.09	45.94		0.936468	4.04967	0.189594	0.459351		1.18426	4.28417	0.0950348	0.413072		1.93357	4.88896	0.00615903	0.0349988		0.218934	4.5964	0.754939	0.950084
unitig30_460	2.53	3.03	1.03	7.55		1.60721	2.33823	0.0586988	0.239411		0.165898	1.517	0.904233	1		-1.46484	0.923508	0.228158	0.413344		-1.47138	2.36341	0.0682262	0.346112
unitig30_461	2.68	2.23	2.55	2.87		0.135813	1.83901	0.92171	0.99169		-0.359799	1.66272	0.745262	0.94163		-0.270375	1.74821	0.7571	0.873553		-0.524747	1.70811	0.579401	0.873296
unitig30_462	7.18	5.74	6.64	9.08		0.376122	3.76003	0.615257	0.835663		-0.41888	3.42602	0.575233	0.863769		-0.311589	3.52343	0.693271	0.830986		-0.824004	3.63218	0.25521	0.647808
unitig30_463	11.45	9.32	3.29	8.76		-0.34822	5.40052	0.608802	0.830903		-0.394082	5.44614	0.557294	0.853245		-1.99757	4.99164	0.00456574	0.0284822		-0.0746817	5.24279	0.923487	1
unitig30_464	76.71	61.59	33.7	37.07		-1.01073	5.39974	0.135422	0.38539		-0.412638	5.69443	0.537977	0.843158		-1.38491	5.39895	0.0427685	0.136769		0.569336	5.18908	0.399704	0.762956
unitig30_465	37.84	32.1	37.28	35.96		-0.0359079	4.09526	0.964551	1		-0.332764	4.01931	0.638836	0.898596		-0.219944	4.12144	0.757802	0.87391		-0.325708	3.98284	0.650114	0.906119
unitig30_466	5.82	5.86	4.2	5.75		0.020254	3.43898	1	1		-0.0861115	3.45024	0.918577	1		-0.669436	3.23772	0.357297	0.552352		-0.135182	3.4378	0.85848	0.986014
unitig30_467	7.15	15.84	16.65	15.11		1.11644	4.0041	0.118387	0.357053		1.05022	4.02826	0.140065	0.500256		1.01933	4.05986	0.1539	0.320179		-0.0951318	4.4473	0.892367	0.994985
unitig30_468	3.03	7.66	5.56	3.44		0.221017	3.06027	0.791892	0.927992		1.23878	3.75605	0.0898795	0.403407		0.674656	3.43909	0.37455	0.56772		0.989147	3.77828	0.159436	0.527541
unitig30_469	1.05	2.5	1.97	0.57		-0.801835	-0.0465703	0.769726	0.917838		1.13742	0.844999	0.352672	0.73022		0.694994	0.641689	0.670342	0.81385		1.91807	0.585205	0.109379	0.443679
unitig30_470	15.87	28.13	23.32	14.49		-0.0934439	2.34751	0.944323	1		0.727452	2.86377	0.352333	0.73022		0.354959	2.69471	0.688885	0.826872		0.792506	2.78492	0.307454	0.698188
unitig30_471	3.58	6.4	7.39	4.25		0.282918	1.99972	0.795106	0.93008		0.738585	2.32583	0.42351	0.774602		0.842125	2.4417	0.303322	0.498042		0.427099	2.37687	0.586413	0.875043
unitig30_472	13.36	23.18	17.34	12.39		-0.071031	3.6894	0.930385	0.995568		0.697849	4.1826	0.316141	0.704032		0.177271	3.93284	0.820929	0.913743		0.740201	4.12305	0.296152	0.687997
unitig30_473	138.54	98.97	33.68	105.52		-0.355092	7.60889	0.590265	0.819994		-0.581297	7.58037	0.378289	0.747581		-2.23883	7.16747	0.00115684	0.0110564		-0.255044	7.36139	0.699249	0.92845
unitig30_474	9.26	3.28	2.16	1.51		-2.56024	2.81396	0.00164946	0.0226768		-1.58868	3.06651	0.036071	0.258245		-2.29182	2.95245	0.00357069	0.0241419		0.944442	1.75525	0.282111	0.676159
unitig30_476	13.1	9.13	8.85	9.09		-0.4867	1.92865	0.579401	0.813861		-0.613254	1.93204	0.526087	0.836829		-0.76042	1.91778	0.351957	0.547188		-0.155164	1.66942	0.925108	1
unitig30_477	106.12	115.94	36.11	44.96		-1.20105	7.11996	0.072048	0.27038		0.0316316	7.68273	0.963115	1		-1.75357	7.08974	0.00965296	0.0485662		1.20388	7.18642	0.0712446	0.354749
unitig30_478	10.63	20.11	16.79	15.11		0.543174	2.37183	0.527497	0.77802		0.82029	2.60584	0.299162	0.687074		0.458587	2.43911	0.634719	0.787735		0.248344	2.76258	0.778919	0.957459
unitig30_479	14.78	8.21	8.81	9.99		-0.527187	4.55166	0.441599	0.720447		-0.93581	4.45912	0.177563	0.552287		-0.937021	4.50816	0.176345	0.35087		-0.437467	4.13053	0.537955	0.84854
unitig30_480	154.8	87.58	35.91	107.13		-0.493305	5.65055	0.467199	0.738073		-0.921199	5.55182	0.172352	0.545213		-2.31183	5.24681	0.00111739	0.0107972		-0.456738	5.23774	0.497204	0.828542
unitig30_481	2.29	2.03	3.51	0.91		-1.29098	1.88536	0.128892	0.375012		-0.268874	2.32521	0.776274	0.951656		0.414891	2.72882	0.615458	0.773907		0.994835	1.78623	0.252505	0.645225
unitig30_482	3.6	1.88	4.24	2.25		-0.626149	0.583748	0.670342	0.868183		-1.00724	0.499152	0.497906	0.828765		0.0381728	0.946223	1	1		-0.409847	0.184305	1	1
unitig30_483	3.62	7.98	10.61	6.35		0.840425	1.70936	0.393996	0.682072		1.03432	1.89715	0.240055	0.633997		1.3415	2.15327	0.129867	0.287749		0.164977	2.13067	0.8871	0.99423
unitig30_484	2.84	3.34	3.84	9.14		1.70046	1.40157	0.101169	0.325363		0.132355	0.563296	1	1		0.230422	0.65222	1	1		-1.59978	1.37911	0.107412	0.441274
unitig30_485	1.81	1.55	3.85	3.97		1.15504	1.26702	0.253153	0.53955		-0.314777	0.572818	1	1		0.878333	1.21449	0.465039	0.651484		-1.5013	1.14712	0.14853	0.510404
unitig30_486	2.17	2.12	1.09	1.59		-0.399285	-0.188664	1	1		-0.123721	-0.060366	1	1		-1.13996	-0.329382	0.726708	0.852987		0.249841	-0.26637	1	1
unitig30_487	4.75	3.83	7.84	11.44		1.29753	1.99997	0.146339	0.402253		-0.400933	1.13463	0.763627	0.950521		0.519824	1.63636	0.656347	0.803584		-1.72913	1.88174	0.038112	0.249664
unitig30_488	1.73	2.82	4.61	3.22		0.929701	1.62994	0.369464	0.658201		0.603294	1.50208	0.545468	0.846667		1.20775	1.92731	0.167446	0.338321		-0.355742	1.83452	0.734082	0.940191
unitig30_489	22.47	47.57	63.47	23.24		0.0866292	4.81581	0.902294	0.983249		0.985557	5.4144	0.147889	0.512309		1.29869	5.681	0.057059	0.164962		0.870156	5.41402	0.195285	0.574588
unitig30_490	126.51	261.32	144.95	189.14		0.617782	7.85094	0.348972	0.636858		0.950283	8.12819	0.151151	0.517099		-0.00270365	7.62584	0.998251	1		0.303662	8.34789	0.643895	0.90175
unitig30_491	13.89	9.22	18.36	7.73		-0.802633	1.86991	0.392904	0.681735		-0.683295	1.96875	0.477216	0.815755		0.202873	2.43039	0.839045	0.923167		0.0910919	1.55946	1	1
unitig30_492	4.15	5.85	4.55	3.26		-0.306076	1.44845	0.804303	0.935275		0.397553	1.85449	0.700163	0.922449		-0.0653759	1.66071	1	1		0.675768	1.69304	0.45842	0.801472
unitig30_493	8.32	4.88	13.74	12.56		0.627872	2.10783	0.450687	0.724993		-0.857112	1.46364	0.394949	0.752977		0.521252	2.16158	0.573359	0.738593		-1.51516	1.84888	0.0678523	0.345041
unitig30_494	4.82	2.72	5.47	5.59		0.252355	3.18772	0.744483	0.906854		-0.918305	2.7212	0.246285	0.640944		-0.0160903	3.16151	1	1		-1.19992	2.8813	0.108945	0.443679
unitig30_495	58.83	100.69	74.02	49.34		-0.216066	6.1958	0.75064	0.910438		0.679103	6.74648	0.307913	0.695087		0.13255	6.48595	0.843303	0.92556		0.866362	6.64241	0.193191	0.571218
unitig30_496	27.45	61.01	101.17	40.88		0.611688	4.74349	0.376702	0.665069		1.05515	5.09422	0.122219	0.468531		1.68191	5.59509	0.0148353	0.0652136		0.414635	5.29007	0.541163	0.850622
unitig30_497	155.32	194.44	253.9	192.49		0.347167	8.92939	0.596836	0.823742		0.227907	8.93071	0.728448	0.932934		0.510046	9.14115	0.437348	0.627556		-0.1481	9.08246	0.821421	0.975608
unitig30_498	17.34	23.18	30.11	18.38		0.121753	4.74507	0.863697	0.96633		0.322599	4.92009	0.645776	0.90244		0.596949	5.13087	0.385731	0.580299		0.172036	4.95044	0.805971	0.971037
unitig30_499	16.66	6.22	16.92	7.13		-1.18462	4.10787	0.0948641	0.3127		-1.51613	4.07264	0.0342877	0.255747		-0.176572	4.61764	0.812719	0.908685		-0.360291	3.31582	0.629284	0.89489
unitig30_500	17.64	34.66	73.31	30.68		0.835849	5.56765	0.217899	0.497595		0.878029	5.66219	0.192498	0.567823		1.85573	6.41446	0.00681688	0.0375304		0.0133296	5.98733	0.987474	1
unitig30_501	13.65	15.93	30.5	9.74		-0.447691	3.01508	0.554174	0.797268		0.126425	3.35288	0.883507	0.99642		0.959047	3.89858	0.185865	0.363587		0.545586	3.13509	0.460755	0.802331
unitig30_502	2.53	2.65	4.8	4.63		0.910527	3.89677	0.203417	0.477218		-0.0285132	3.42304	1	1		0.724966	3.89888	0.31939	0.514762		-0.968088	3.91803	0.165774	0.538004
unitig30_503	0	10.64	19.59	3.53		5.16961	-0.36228	0.161491	0.422726		6.67492	0.67077	0.00286389	0.0664692		7.48861	1.35002	0.000164799	0.00324398		1.40768	0.849239	0.183672	0.56188
unitig30_504	5.78	13.15	19.52	4.64		-0.27505	1.13613	0.763627	0.916201		1.0814	1.92742	0.21203	0.594932		1.5472	2.2967	0.0734022	0.19719		1.32928	1.7826	0.146339	0.509032
unitig30_505	4.46	7.2	14.06	2.61		-0.717673	0.195257	0.585507	0.816474		0.584609	0.786867	0.700311	0.922449		1.43913	1.34852	0.14853	0.312363		1.2784	0.514894	0.305221	0.696276
unitig30_506	10.66	24.67	42.67	17.97		0.78898	3.50139	0.279364	0.56793		1.11195	3.78036	0.121194	0.466801		1.79906	4.32888	0.0125985	0.0582799		0.294128	4.03015	0.675112	0.918754
unitig30_507	226.83	124.87	69.5	74.8		-1.56271	7.77288	0.0201025	0.124635		-0.957195	8.01864	0.148217	0.512309		-1.90514	7.81072	0.00498976	0.0304117		0.576702	7.17158	0.382225	0.754285
unitig30_508	5.38	2.08	7.05	1.29		-2.01864	2.83671	0.00974101	0.0786364		-1.46183	3.02642	0.0565714	0.328743		0.189911	3.74896	0.798318	0.900058		0.528967	1.94031	0.526983	0.842725
unitig30_509	52.65	17.84	33.32	35.51		-0.530101	5.50955	0.431718	0.714584		-1.6565	5.20742	0.0165577	0.171753		-0.85845	5.4986	0.201461	0.382455		-1.15532	4.82161	0.0939703	0.408052
unitig30_510	68.89	69.94	42.53	19.32		-1.79514	4.96683	0.00986024	0.0791722		-0.0743047	5.6373	0.919461	1		-0.894268	5.34159	0.184862	0.36221		1.69228	4.96307	0.0145428	0.136825
unitig30_511	25.52	23.15	41.61	13.56		-0.874064	4.1365	0.211978	0.488701		-0.236805	4.46315	0.74254	0.94098		0.505752	4.90616	0.462353	0.648686		0.608618	4.04313	0.391615	0.75914
unitig30_512	33.49	55.32	31.88	141.28		2.1141	7.02514	0.00208744	0.0269098		0.627908	6.02911	0.350796	0.73022		-0.269662	5.60167	0.692271	0.830255		-1.51508	7.21553	0.024302	0.19022
unitig30_513	867.78	313.51	53.9	501.68		-0.752871	9.93283	0.252366	0.539125		-1.56489	9.74739	0.0193803	0.187247		-4.20756	9.45401	1.69e-08	3.05e-06		-0.840859	9.21057	0.201936	0.584186
unitig30_514	85.4	154.48	36.49	77.19		-0.108175	6.39261	0.871496	0.969922		0.758817	6.94178	0.253049	0.646183		-1.42526	6.01519	0.0352697	0.119739		0.838178	6.87776	0.206085	0.589965
unitig30_515	0	0	0	0		NA	NA	NA	NA		NA	NA	NA	NA		NA	NA	NA	NA
unitig30_516	0.27	1.4	1.74	1.2		2.11097	0.627233	0.0729734	0.271802		2.20782	0.759895	0.109379	0.442648		2.41728	0.958076	0.06403	0.177992		0.0655774	1.18138	1	1
unitig30_517	0.39	2.84	1.74	0.99		1.34544	0.171788	0.372947	0.662287		2.71785	1.12197	0.0297218	0.23461		1.92007	0.620722	0.189984	0.367962		1.3437	1.21666	0.14853	0.510404
unitig30_518	0.8	1.91	3.15	3.94		2.30858	1.56361	0.0237107	0.137123		1.13742	0.844999	0.352672	0.73022		1.75409	1.29361	0.0967864	0.235081		-1.20239	1.74961	0.165529	0.537961
unitig30_519	3.47	3.72	3.41	5.85		0.785665	2.01439	0.372408	0.661771		0.00430795	1.64836	1	1		-0.224501	1.58491	0.909315	0.96954		-0.810851	2.01453	0.325858	0.712434
unitig30_520	2.36	7.51	6.06	11.79		2.34648	3.01368	0.00357069	0.0391572		1.56426	2.49428	0.0637892	0.348782		1.1527	2.26343	0.178488	0.353723		-0.811724	3.39998	0.264057	0.65681
unitig30_521	14.95	4.15	2.61	9.12		-0.675143	4.11766	0.332007	0.621096		-1.94019	3.79907	0.00808179	0.117193		-2.70723	3.70769	0.000400533	0.0053853		-1.29416	3.31114	0.0767166	0.371828
unitig30_522	4.77	3.35	3.43	10.46		1.16544	3.01988	0.13149	0.376757		-0.603955	2.1221	0.467814	0.810264		-0.673808	2.13887	0.467814	0.65353		-1.79913	2.87494	0.0197199	0.167333
unitig30_523	14.91	16.4	27.53	13.4		-0.115746	2.44476	0.947666	1		0.0416557	2.58484	1	1		0.684119	2.99771	0.364258	0.559647		0.128764	2.50182	0.912508	1
unitig30_524	4.62	10.16	12.93	7.08		0.652713	3.05552	0.394662	0.682241		1.03931	3.36879	0.1685	0.540877		1.28429	3.58835	0.0853734	0.217399		0.357795	3.56233	0.641485	0.901204
unitig30_525	19.09	20.27	21.86	23.85		0.357745	3.20978	0.656635	0.863447		-0.00968795	3.07912	1	1		-0.00331007	3.13202	1	1		-0.396362	3.2372	0.587117	0.875043
unitig30_526	20.66	13.83	10.61	22.76		0.177258	3.67592	0.836273	0.952507		-0.674062	3.34395	0.358656	0.735763		-1.15778	3.21564	0.117192	0.267704		-0.88034	3.44265	0.217311	0.604504
unitig30_527	4.03	5.34	16.51	9.39		1.25535	3.24878	0.0923299	0.309354		0.309912	2.72794	0.696416	0.921794		1.832	3.79175	0.0144252	0.0638743		-0.974649	3.36051	0.16959	0.54392
unitig30_528	7.33	4.18	20.01	11.3		0.661298	4.09267	0.354536	0.64293		-0.903686	3.39748	0.209174	0.591903		1.24724	4.59675	0.0721339	0.195024		-1.59416	3.84655	0.0254155	0.194622
unitig30_529	124.06	301.34	423	295.8		1.29164	7.39724	0.0533365	0.228798		1.18454	7.38932	0.0757749	0.377713		1.57073	7.71927	0.0196783	0.0798807		-0.135943	7.89624	0.836793	0.980577
unitig30_530	282.54	68.8	77.33	64.35		-2.09687	6.96049	0.00223126	0.0279486		-2.13346	7.01937	0.00188743	0.0531879		-2.06542	7.08317	0.00255341	0.0189861		-0.0653923	5.59873	0.929163	1
unitig30_531	9.08	18.24	19.53	3.37		-1.37502	2.58693	0.0837705	0.291473		0.904989	3.71291	0.2153	0.599247		0.89783	3.76035	0.213378	0.396039		2.25245	3.3359	0.00293808	0.046379
unitig30_532	100.38	54.17	52.9	70.96		-0.464363	6.32014	0.484901	0.751732		-0.987966	6.18737	0.141132	0.503533		-1.12484	6.19314	0.0938108	0.230654		-0.552451	5.88352	0.407234	0.768345
unitig30_533	33.83	20.36	12.04	14.25		-1.21039	5.30412	0.0763711	0.278928		-0.826284	5.49773	0.222781	0.607742		-1.68366	5.28846	0.0147351	0.0648743		0.355354	4.83648	0.610575	0.885631
unitig30_534	1.01	0.81	1.39	0.44		-1.07241	0.591067	0.390133	0.679979		-0.367882	0.880558	0.725047	0.931553		0.382484	1.28184	0.779001	0.887239		0.679061	0.440711	0.542974	0.850975
unitig30_535	18.88	23.39	20.53	33.19		0.854643	5.8618	0.202705	0.476075		0.215092	5.55043	0.753404	0.947809		-0.0745617	5.4522	0.914705	0.972963		-0.668426	5.98736	0.316391	0.704619
unitig30_536	67.59	69.82	91.9	113.34		0.774756	4.38962	0.273801	0.562437		-0.0520869	3.99027	0.961863	1		0.242965	4.19529	0.751833	0.869838		-0.855806	4.40847	0.213071	0.600075
unitig30_537	850.3	672.13	495.08	833.69		0.00925821	11.0774	0.988846	1		-0.435327	10.9383	0.5063	0.834555		-0.979159	10.7829	0.137816	0.299302		-0.473426	10.9271	0.469917	0.808337
unitig30_538	15.82	10.57	18.78	6.52		-1.23951	4.93303	0.0718865	0.270254		-0.680227	5.19062	0.315377	0.703296		0.0499329	5.57058	0.947528	0.992897		0.530584	4.54821	0.445349	0.792034
unitig30_539	18.23	14.23	13.03	12.15		-0.548953	5.21843	0.422919	0.709084		-0.451884	5.32449	0.510464	0.835519		-0.681684	5.28107	0.316193	0.511163		0.0682703	5.01831	0.926998	1
unitig30_540	1.73	2.43	5.07	1.18		-0.496501	2.71731	0.538599	0.786232		0.394478	3.2218	0.63067	0.896224		1.35385	3.88942	0.0628368	0.176059		0.862622	3.00093	0.255394	0.647808
unitig30_541	76.88	140.83	215.39	65.93		-0.186124	6.69717	0.778702	0.922299		0.77599	7.29414	0.242047	0.636646		1.28603	7.68769	0.0541604	0.159547		0.933298	7.20351	0.159442	0.527541
unitig30_542	65.62	1090.58	2592.32	1200.43		4.23015	10.0811	1.45e-08	1.58e-06		3.95787	9.89118	7.88e-08	3.51e-05		5.1043	11.0397	5.17e-11	3.14e-08		-0.301131	10.9252	0.645393	0.902805
unitig30_543	5.03	7.26	14.52	8.83		0.844236	4.20678	0.23031	0.514591		0.421498	4.01774	0.554676	0.852421		1.32088	4.64856	0.0579614	0.166242		-0.451658	4.40459	0.51256	0.839394
unitig30_544	54.72	54.69	225.99	27.25		-0.967786	6.07996	0.150067	0.406021		-0.0954442	6.50533	0.890935	0.998589		1.84792	7.80524	0.00643363	0.0359448		0.843563	6.06476	0.207268	0.591586
unitig30_545	10.48	9.34	13.04	14.9		0.528349	1.96018	0.579401	0.813861		-0.260958	1.61795	0.824298	0.971211		0.102139	1.84071	0.92171	0.976863		-0.818774	1.8711	0.354733	0.734867
unitig30_546	8.67	7.29	7.14	24.55		1.53964	4.79319	0.0277436	0.151532		-0.344624	3.73222	0.651145	0.904291		-0.471206	3.72572	0.506213	0.686275		-1.91339	4.75075	0.00645691	0.0813396
unitig30_547	30.15	22.57	6.91	66.92		1.19237	5.07741	0.0833605	0.290885		-0.513657	4.19055	0.477489	0.815755		-2.33003	3.71127	0.00193021	0.0157916		-1.73506	4.9826	0.0126004	0.124491
unitig30_548	9.28	10.34	15.38	8.88		-0.0204776	4.24861	1	1		0.0625072	4.35639	0.940524	1		0.535011	4.66995	0.441054	0.63052		0.0541844	4.32374	0.947986	1
unitig30_549	22.2	4.1	3.2	5.84		-1.89693	3.67934	0.00990783	0.0794035		-2.50697	3.6211	0.000881111	0.0356368		-2.97017	3.60073	0.000157466	0.00316575		-0.638892	2.28509	0.447595	0.793745
unitig30_550	0	0.33	0.24	0.58		5.64353	-0.0789967	0.0565217	0.23632		4.80634	-0.539635	0.285714	0.674324		4.38156	-0.720004	0.285714	0.47943		-0.940948	0.187147	0.63315	0.897077
unitig30_551	1.47	4.17	6.74	6.02		2.06144	2.25515	0.0228861	0.134376		1.3997	1.85301	0.128197	0.479125		1.98807	2.3289	0.0202064	0.0809785		-0.691507	2.60886	0.374612	0.7459
unitig30_552	0.75	1.75	3.13	2.4		1.70046	1.40157	0.101169	0.325363		1.11917	1.09285	0.324544	0.710986		1.85159	1.633	0.074136	0.198443		-0.611516	1.67514	0.508053	0.836431
unitig30_553	0	0	0	1.39		5.42594	-0.21345	0.0942029	0.311736		NA	NA	NA	NA		NA	NA	unitig30_553	-5.69332		0.0565217	0.309942
unitig30_554	1.59	2.34	1.19	5.81		1.79998	-0.205217	0.430642	0.714331		0.420231	-0.716581	1	1		-0.546216	-0.924338	1	1		-1.41979	-0.260242	0.521739	0.841204
unitig30_555	2.55	1.4	0.72	2.91		0.22665	1.97	0.859853	0.963834		-0.949614	1.51352	0.343208	0.725453		-2.00139	1.25677	0.0638717	0.177797		-1.20613	1.64717	0.167446	0.539315
unitig30_556	25.51	15.18	22.03	15.82		-0.650209	3.19062	0.392776	0.681735		-0.842603	3.17679	0.2464	0.640944		-0.409672	3.4018	0.590607	0.753489		-0.221144	2.80271	0.820717	0.975608
unitig30_557	13.67	12.57	8.38	6.75		-0.978474	3.4794	0.172504	0.439314		-0.216825	3.85202	0.774449	0.951547		-0.903389	3.61459	0.212838	0.395645		0.733172	3.40015	0.322495	0.709908
unitig30_558	30.12	22.94	27.81	19.88		-0.561183	4.7546	0.415539	0.703357		-0.488319	4.84975	0.477733	0.815755		-0.31359	4.97672	0.647046	0.797087		0.0440788	4.5362	0.966109	1
unitig30_559	22.82	98.03	134.5	42.84		0.941486	2.20769	0.262816	0.552077		1.99921	3.02254	0.0111952	0.139183		2.35247	3.35469	0.00308113	0.0216572		1.02903	3.1867	0.159556	0.527541
unitig30_560	15.41	55.84	96.76	30.55		1.02317	3.9705	0.155153	0.413432		1.7589	4.56489	0.0137391	0.154661		2.44902	5.16864	0.000641709	0.00737705		0.706901	4.82456	0.298263	0.690046
unitig30_561	10.06	9.59	16.04	10.65		0.119942	3.1524	0.900079	0.981704		-0.164192	3.0739	0.86044	0.987531		0.473095	3.46413	0.5345	0.70711		-0.313012	3.1141	0.683945	0.92351
unitig30_562	726.3	2320.93	3127.2	2493.58		1.81719	9.46692	0.00706698	0.0639799		1.57986	9.35263	0.0183716	0.181049		1.90725	9.65597	0.00481146	0.0295372		-0.266167	10.0412	0.684358	0.92384
unitig30_563	14.45	16.49	21.31	5.42		-1.37456	4.35987	0.0508911	0.22214		0.0942193	5.00998	0.895475	0.999413		0.361142	5.20603	0.594972	0.756355		1.44026	4.48268	0.0386405	0.25216
unitig30_564	6.96	15.61	25.52	3.41		-0.987416	4.20874	0.159563	0.4212		1.06919	5.32275	0.116538	0.455062		1.67586	5.80984	0.014852	0.0652534		2.02807	5.04032	0.00393713	0.0574562
unitig30_565	34.67	30.05	64.06	11.72		-1.52576	5.22011	0.0269265	0.149119		-0.302422	5.71683	0.652527	0.904688		0.686823	6.2974	0.30277	0.497402		1.19468	5.05504	0.0804481	0.379195
unitig30_566	6.56	3.31	5.08	7.34		0.198287	2.88617	0.841624	0.954261		-1.0786	2.39244	0.188387	0.564359		-0.566832	2.6323	0.516859	0.695374		-1.30632	2.52488	0.0955872	0.412363
unitig30_567	45.27	66.14	19.78	30.69		-0.523044	6.36402	0.433573	0.716269		0.450671	6.91262	0.496	0.828765		-1.3931	6.18148	0.0394166	0.129116		0.944914	6.69025	0.156587	0.523831
unitig30_568	15.13	25.65	46.12	15.93		0.11196	5.46436	0.874848	0.97207		0.664908	5.84503	0.321318	0.708878		1.40878	6.39543	0.0370298	0.123929		0.52414	5.86373	0.434684	0.785656
unitig30_569	22.35	46.41	112.9	71.61		1.71678	5.97296	0.0120615	0.0907714		0.957657	5.50002	0.159264	0.529708		2.13697	6.42355	0.00200019	0.0161769		-0.788021	6.30228	0.236773	0.629175
unitig30_570	15.02	55.51	95.05	46.12		1.655	5.07326	0.0170765	0.113063		1.7885	5.24344	0.0105031	0.134696		2.46167	5.83741	0.000500654	0.0062464		0.104614	5.77432	0.879402	0.993094
unitig30_571	5.52	4.05	7.63	3.4		-0.659014	1.7924	0.488687	0.754155		-0.539638	1.89447	0.579401	0.866269		0.266717	2.33105	0.828551	0.916483		0.0910919	1.55946	1	1
unitig30_572	4.65	4.26	11.34	2.55		-0.801835	-0.0465703	0.769726	0.917838		-0.2153	0.182485	1	1		1.06854	0.852978	0.352672	0.547261		0.562538	-0.14224	0.769726	0.95465
unitig30_574	3061.76	1796.49	1756.4	1026.01		-1.53958	9.68755	0.0213471	0.129241		-0.865294	9.95926	0.189068	0.564543		-1.00063	9.96404	0.129732	0.287674		0.645454	9.14312	0.326094	0.712434
unitig30_575	4525.17	3139.33	2615.81	1915.73		-1.20237	10.3873	0.0697305	0.264263		-0.623642	10.6552	0.342007	0.725453		-0.989613	10.5733	0.133777	0.292602		0.549891	10.028	0.401882	0.765218
unitig30_576	125.96	202.66	180.59	176.11		0.520989	6.0735	0.436752	0.718557		0.58978	6.18148	0.377502	0.746526		0.320684	6.07696	0.63222	0.787054		0.03995	6.38915	0.955693	1
unitig30_577	10.36	10.87	17.22	10.25		0.0222927	4.28542	0.984394	1		-0.0269927	4.32618	0.984798	1		0.533496	4.68437	0.436654	0.626831		-0.0781056	4.31588	0.921464	1
unitig30_578	9.36	5.49	5.9	2.19		-2.04029	1.75417	0.0275183	0.150832		-0.860279	2.13437	0.290499	0.679199		-0.860254	2.17863	0.308509	0.503442		1.15405	1.26378	0.270771	0.665505
unitig30_579	103.32	133.24	138.71	159.93		0.667739	6.40172	0.314557	0.602161		0.270596	6.23796	0.687063	0.917366		0.225965	6.26496	0.735145	0.858613		-0.425997	6.55887	0.522925	0.841204
unitig30_580	23.08	12.26	9.32	14.05		-0.678243	4.70793	0.320788	0.609494		-1.00742	4.65193	0.142302	0.505471		-1.50478	4.54946	0.0329681	0.114585		-0.358003	4.23171	0.612644	0.885638
unitig30_581	274.46	300.35	362.91	179.08		-0.578044	5.38792	0.393738	0.682072		0.0338972	5.73306	0.965173	1		0.204006	5.87327	0.76302	0.876527		0.583167	5.45553	0.384749	0.756302
unitig30_582	25.25	36.88	25.25	23.18		-0.08768	4.82228	0.902892	0.983249		0.451449	5.17635	0.504762	0.833611		-0.198186	4.88568	0.78222	0.889909		0.51035	5.11451	0.45349	0.798518
unitig30_583	8.48	23.1	45.44	11.74		0.512147	4.55327	0.470055	0.739978		1.35136	5.16857	0.0503749	0.309273		2.22564	5.89218	0.00150904	0.0133028		0.810425	5.29728	0.23019	0.622358
unitig30_584	8.5	8.41	5.19	6.44		-0.352889	3.66501	0.63358	0.848644		-0.106881	3.84394	0.895221	0.999413		-0.891686	3.5577	0.217049	0.400575		0.217295	3.65425	0.777016	0.957459
unitig30_585	92.23	38.92	21.47	53.52		-0.736587	3.90249	0.296001	0.58333		-1.33208	3.76221	0.0663262	0.355788		-2.29169	3.5811	0.00220135	0.0171656		-0.624385	3.28755	0.389201	0.758345
unitig30_586	5.17	14.26	31.14	11		1.12488	4.25083	0.109896	0.343122		1.37058	4.49075	0.0512885	0.312612		2.39406	5.33647	0.000781154	0.0084532		0.216827	4.85863	0.750166	0.947739
unitig30_587	166.47	598.71	273.46	286.41		0.820781	8.2927	0.213823	0.491136		1.75082	9.01752	0.00935195	0.126701		0.517805	8.22509	0.431506	0.621967		0.901198	9.22646	0.17186	0.546539
unitig30_588	12.96	22.99	40.75	17.87		0.502069	4.88534	0.462353	0.733845		0.728536	5.08949	0.289128	0.678028		1.45159	5.6312	0.0333117	0.115485		0.197637	5.27025	0.770321	0.95465
unitig30_589	12.95	24.71	61.1	33.34		1.4001	5.88126	0.0398426	0.19		0.834248	5.56309	0.218481	0.603806		2.03823	6.48758	0.003118	0.0218304		-0.594736	6.20479	0.369673	0.7459
unitig30_590	22.65	34.7	57.32	33.14		0.587831	5.56963	0.383893	0.673443		0.518014	5.59516	0.44201	0.787531		1.13877	6.04342	0.0910751	0.22665		-0.0986652	5.84182	0.885048	0.99423
unitig30_591	43.8	17.58	8.85	18.83		-1.18301	5.53936	0.0808905	0.288213		-1.41531	5.53597	0.0376852	0.264509		-2.50108	5.35545	0.00043027	0.00561602		-0.261117	4.7773	0.70926	0.932444
unitig30_592	72.48	115.9	169.21	29.11		-1.27732	6.50153	0.0568492	0.237246		0.580196	7.39114	0.379674	0.748605		1.02271	7.72366	0.123599	0.27741		1.82875	6.97717	0.00709071	0.0862381
unitig30_593	10.04	12.65	7.84	7.12		-0.442749	3.24968	0.557945	0.800743		0.247822	3.65119	0.741819	0.940795		-0.531231	3.32222	0.472508	0.657497		0.662014	3.44176	0.367826	0.7459
unitig30_594	27.06	23.31	13.7	40		0.609396	4.45007	0.385507	0.675228		-0.303062	4.0328	0.676157	0.911689		-1.17888	3.74198	0.102421	0.24429		-0.941424	4.37867	0.176268	0.552801
unitig30_595	18.5	42.09	72.11	36.88		1.03227	6.74445	0.121351	0.361912		1.08849	6.84965	0.102788	0.429969		1.76274	7.39114	0.00935462	0.0474669		0.0273743	7.24237	0.968516	1
unitig30_596	1.31	6.64	11.81	7.34		2.56823	2.65066	0.0032194	0.0364391		2.30029	2.51304	0.00778326	0.115021		3.01495	3.14965	0.000299252	0.00454992		-0.297592	3.25836	0.688856	0.924555
unitig30_597	1.87	2.06	7.14	3.64		0.992842	2.03827	0.252505	0.539125		0.0414698	1.56452	1	1		1.72414	2.66429	0.0320826	0.112243		-0.981057	2.04391	0.23162	0.624108
unitig30_598	22.61	37.39	52.98	42.2		0.940304	5.70292	0.162987	0.425064		0.629256	5.57371	0.35172	0.73022		1.03106	5.88228	0.125232	0.279745		-0.339914	5.99296	0.608107	0.885317
unitig30_599	30.3	54.92	58.06	17.26		-0.775154	5.55924	0.247396	0.53358		0.762566	6.39554	0.252603	0.645949		0.739851	6.4328	0.267953	0.461679		1.50898	6.1271	0.0261674	0.198943
unitig30_600	22.05	20.02	17.98	29.62		0.47084	4.52916	0.505476	0.764121		-0.224059	4.2306	0.760696	0.950521		-0.479501	4.16594	0.491639	0.674821		-0.723821	4.48176	0.291978	0.684295
unitig30_601	12.33	4.18	3.29	5.9		-1.03072	3.82814	0.151877	0.409193		-1.6709	3.7007	0.020167	0.188906		-2.08749	3.65228	0.00476239	0.0292996		-0.669078	3.01564	0.383391	0.755289
unitig30_602	89.91	123.62	123.42	127.48		0.544879	5.25231	0.41956	0.707154		0.367367	5.21646	0.58742	0.867895		0.26094	5.20844	0.71096	0.842428		-0.206367	5.45526	0.762356	0.952587
unitig30_603	13.51	11.01	11.2	8.87		-0.574437	4.53227	0.407239	0.694896		-0.399433	4.67086	0.55598	0.852421		-0.469599	4.69075	0.499187	0.680994		0.146242	4.35922	0.8481	0.983748
unitig30_604	6.5	19.96	69.89	34.76		2.45203	6.29901	0.000481605	0.00903159		1.51884	5.6285	0.0267036	0.220461		3.22315	7.09059	7.99e-06	0.000370357		-0.962096	6.70802	0.148316	0.510404
unitig30_605	5	33.7	7.79	7.38		0.604912	3.11553	0.43449	0.717058		2.65757	4.692	0.00030457	0.0192152		0.45152	3.14316	0.577675	0.742126		2.02404	4.74171	0.00421868	0.0598022
unitig30_606	7.24	15.41	24.55	12.83		0.841516	3.30328	0.247574	0.53358		0.964881	3.45111	0.19053	0.566365		1.53908	3.90222	0.033878	0.116553		0.0944878	3.74072	0.903268	0.999205
unitig30_607	12.49	14.14	16.85	14.52		0.256035	4.3775	0.713272	0.89475		0.0885145	4.35438	0.910882	1		0.236149	4.48405	0.74254	0.865701		-0.19637	4.45967	0.788648	0.962755
unitig30_608	227.52	312.66	211.99	64.15		-1.78682	6.94392	0.00850569	0.0726933		0.362679	7.83831	0.582028	0.866889		-0.300706	7.5538	0.648648	0.797892		2.12074	7.27458	0.00196453	0.0346223
unitig30_609	7.29	2.03	2.82	2.22		-1.68292	2.98738	0.0304424	0.159459		-1.93453	2.98214	0.0133652	0.153706		-1.55967	3.11951	0.0402726	0.131009		-0.28019	1.9229	0.809946	0.972908
unitig30_610	3.69	4.33	5.6	3.47		-0.044881	3.58629	0.975128	1		0.137801	3.74493	0.865655	0.989856		0.410681	3.94659	0.565977	0.732644		0.153927	3.69812	0.841457	0.981835
unitig30_611	89.47	54.17	8.83	52.44		-0.734105	5.22328	0.276895	0.566109		-0.822303	5.25538	0.226316	0.613528		-3.52641	4.76125	4.25e-06	0.000250192		-0.117004	4.82101	0.870316	0.990962
unitig30_612	1.38	0.37	0.73	0.09		-3.69653	0.529584	0.0197869	0.124023		-1.96336	0.771826	0.083497	0.394812		-1.0587	1.04562	0.324544	0.518709		1.72934	-0.55927	0.430642	0.784786
unitig30_613	9.01	10.67	13.25	15.57		0.814075	3.7469	0.251511	0.539025		0.142445	3.42324	0.88901	0.998589		0.338152	3.58101	0.654801	0.802677		-0.70063	3.82943	0.32086	0.708137
unitig30_614	648.35	226.32	163.07	684.06		0.11477	9.59404	0.861134	0.964484		-1.61433	9.00949	0.0160954	0.168613		-2.19027	8.93852	0.00135001	0.0122106		-1.75795	9.08633	0.00903887	0.100554
unitig30_615	18.31	6.14	4.26	4.58		-1.96494	4.08996	0.00695269	0.0634117		-1.6782	4.21591	0.0176425	0.178986		-2.29598	4.13214	0.00178125	0.0149329		0.258233	3.03844	0.757515	0.951435
unitig30_616	1.71	2.25	3.05	1.74		-0.0925939	0.947209	1	1		0.155421	1.11788	1	1		0.550907	1.37481	0.597593	0.758184		0.219918	1.02799	1	1
unitig30_617	7.22	17.99	13.88	18.77		1.41293	4.78174	0.0412919	0.194173		1.21651	4.71137	0.0797911	0.3859		0.739471	4.44823	0.28596	0.479464		-0.225333	5.25803	0.74219	0.944248
unitig30_618	1174.82	844.8	628.88	1288.14		0.170503	10.7363	0.794448	0.92944		-0.571886	10.4576	0.383345	0.750971		-1.10043	10.3189	0.0962247	0.234454		-0.771231	10.5468	0.240853	0.633286
unitig30_619	25.2	33.26	43.43	19.52		-0.327648	5.80016	0.626343	0.843537		0.305819	6.18331	0.648576	0.903305		0.586857	6.39708	0.379951	0.57419		0.604668	6.02312	0.365967	0.744481
unitig30_620	19.82	54.78	109.38	38.76		1.01312	4.22435	0.14682	0.402649		1.37358	4.5414	0.0517696	0.31396		2.27025	5.28326	0.00145201	0.0129264		0.331613	4.85963	0.632354	0.897077
unitig30_621	93.21	154.23	136.56	65.24		-0.478763	6.28841	0.472395	0.741433		0.629547	6.92472	0.342702	0.725453		0.350366	6.81288	0.597423	0.758184		1.07951	6.73016	0.106073	0.438139
unitig30_622	7.53	13.2	10.55	3.03		-1.2828	4.19583	0.0668356	0.258429		0.712739	5.17299	0.291391	0.67994		0.285662	4.97356	0.681477	0.822776		1.96707	4.78154	0.00524992	0.070417
unitig30_623	9.61	6	7.56	2.94		-1.66822	3.54706	0.0237739	0.137395		-0.778365	3.88455	0.266708	0.660353		-0.547019	4.02612	0.450668	0.638127		0.861587	3.07939	0.247574	0.640819
unitig30_624	7.32	15.32	10.63	1.64		-1.92674	0.0914124	0.266667	0.555647		1.10677	1.30369	0.253153	0.646183		0.495218	0.996791	0.745855	0.86637		3.01885	0.899973	0.00977491	0.104492
unitig30_625	18.54	24.85	19.77	7.63		-1.23413	4.05524	0.0810621	0.288581		0.322915	4.78814	0.645664	0.90244		-0.111522	4.61173	0.874102	0.9465		1.52858	4.34119	0.0304585	0.219929
unitig30_626	11.44	24.36	36.32	14.65		0.397999	3.82158	0.590367	0.819994		0.989934	4.25331	0.159127	0.529631		1.46372	4.63473	0.0361983	0.121819		0.563168	4.36034	0.421175	0.779882
unitig30_627	13.14	4.74	4.17	1.25		-3.37922	4.45426	9.82e-06	0.000451372		-1.57142	4.8111	0.0236831	0.208126		-1.85114	4.79245	0.0086015	0.0447426		1.78009	3.21022	0.0194639	0.166494
unitig30_628	9.33	10.28	7.42	3.5		-1.38208	3.71906	0.0531306	0.228449		0.0417708	4.34572	0.969989	1		-0.521549	4.13267	0.455718	0.642457		1.3955	3.80956	0.0519659	0.29756
unitig30_629	60.73	147.75	275.25	138.94		1.23201	9.13156	0.0636368	0.251233		1.18688	9.16706	0.0736811	0.371623		1.98176	9.81339	0.00346886	0.0237811		-0.0739694	9.64497	0.910271	1
unitig30_630	7.45	9.01	10.63	2.88		-1.34625	2.69292	0.086932	0.298353		0.166983	3.37441	0.828783	0.973551		0.301624	3.49859	0.711589	0.842898		1.48542	2.87975	0.0493378	0.28824
unitig30_631	17.01	4.85	4.58	4.73		-1.80069	3.34007	0.0172842	0.113815		-1.92767	3.36735	0.011165	0.139183		-2.10023	3.37573	0.00512029	0.031029		-0.155514	2.23175	0.843823	0.981844
unitig30_632	15.85	25.4	38.16	8.12		-0.929444	4.55913	0.181326	0.450737		0.580858	5.34087	0.390279	0.752977		1.0642	5.70097	0.116712	0.266968		1.48168	5.01038	0.0314275	0.224499
unitig30_633	5.45	9.77	19.35	1.98		-1.50916	1.0416	0.148066	0.403224		0.706246	2.03303	0.432544	0.780075		1.60957	2.68689	0.0412252	0.133042		2.19101	1.61052	0.0168101	0.151112
unitig30_634	1.14	0.82	0.69	1.19		0.135813	1.83901	0.92171	0.99169		-0.53871	1.58665	0.567307	0.859366		-0.926712	1.47975	0.394949	0.588264		-0.70384	1.64138	0.438358	0.787548
unitig30_635	0	0.13	0	0		NA	NA	NA	NA		NA	NA	NA	NA		NA	NA	NA	NA
unitig30_636	28.28	16.53	15.67	7.72		-1.82673	3.66569	0.0135483	0.0977294		-0.860075	4.01045	0.226434	0.613528		-1.047	3.99317	0.14023	0.302804		0.938414	3.12809	0.203602	0.586654
unitig30_637	186.59	882.58	1189.9	901.92		2.31149	7.43057	0.000816423	0.0135085		2.14583	7.3619	0.00178947	0.0514565		2.47428	7.68601	0.000364905	0.00513409		-0.194519	8.13014	0.767498	0.954538
unitig30_638	61.7	29.61	20.67	17.68		-1.764	6.23221	0.00982271	0.0789458		-1.15342	6.46254	0.085593	0.395525		-1.77383	6.34575	0.00933516	0.0473965		0.581822	5.4872	0.386164	0.756826
unitig30_639	23.98	7.02	8.6	15.7		-0.551126	2.57538	0.505261	0.763946		-1.87518	2.209	0.0228861	0.203234		-1.64851	2.3063	0.0525501	0.156668		-1.35376	1.84709	0.101443	0.426443
unitig30_640	26.56	16.97	14.83	7.14		-1.84321	4.02704	0.0112936	0.0868122		-0.741659	4.41969	0.28596	0.674716		-1.04279	4.36049	0.134374	0.293671		1.0732	3.55764	0.141771	0.504107
unitig30_641	2.39	2.02	0.93	1.65		-0.5166	2.41364	0.54051	0.787798		-0.355319	2.54246	0.663922	0.907339		-1.5549	2.15435	0.070754	0.19215		0.132768	2.27308	0.949189	1
unitig30_642	85.56	95.61	38.56	17.54		-2.25242	5.3467	0.00136519	0.0198328		0.0635576	6.17691	0.927209	1		-1.34529	5.66862	0.0483995	0.148992		2.28745	5.44979	0.00111236	0.0233403
unitig30_643	36.25	15.39	9.19	8.59		-2.041	4.4369	0.00419262	0.0434952		-1.32188	4.67553	0.0573893	0.331311		-2.16186	4.52233	0.00239967	0.0182101		0.690634	3.5648	0.333266	0.719213
unitig30_644	5.73	8.63	15.52	8.74		0.622834	2.27019	0.499294	0.759262		0.454522	2.23828	0.647858	0.9029		1.22511	2.77435	0.111969	0.259367		-0.197289	2.46825	0.821578	0.975608
unitig30_645	46.35	51.01	36.59	14.7		-1.61993	6.26402	0.0173486	0.114061		0.0409607	6.9476	0.952132	1		-0.541294	6.73162	0.415658	0.607573		1.63215	6.3406	0.0162573	0.147622
unitig30_646	36.01	18.87	10.99	12.3		-1.51135	5.26587	0.0274264	0.150708		-1.02492	5.4755	0.13186	0.483489		-1.91072	5.28373	0.00609176	0.03485		0.457717	4.64376	0.49993	0.830311
unitig30_647	229.65	51.99	29.41	80.05		-1.48244	6.65741	0.0279577	0.15198		-2.24085	6.55702	0.00120123	0.0409485		-3.16343	6.4814	1.18e-05	0.000505179		-0.787264	5.46203	0.242129	0.634395
unitig30_648	3.74	4.06	3.54	3.65		-0.0412414	2.53196	1	1		-0.0125838	2.60858	1	1		-0.279667	2.52736	0.749699	0.86832		-6.4e-05	2.56055	1	1
unitig30_649	8.72	8.16	13.84	10.61		0.293828	2.97995	0.707955	0.892331		-0.19458	2.7938	0.834171	0.97505		0.449602	3.18442	0.559974	0.728049		-0.51739	2.92859	0.504734	0.833554
unitig30_650	10.05	13.94	21.64	10.2		0.0646654	3.22409	0.968423	1		0.369668	3.45399	0.629692	0.895595		0.901338	3.82889	0.202305	0.383138		0.276281	3.4494	0.700737	0.92845
unitig30_651	7.44	4.71	4.46	5.32		-0.412789	1.74678	0.686852	0.878169		-0.718138	1.6771	0.445397	0.790715		-0.886347	1.6563	0.323905	0.518526		-0.334138	1.44891	0.745262	0.945937
unitig30_652	5.41	6.32	14.29	13.37		1.32263	3.70589	0.0703481	0.26577		0.108626	3.0265	0.891888	0.998589		1.1858	3.73308	0.1063	0.250994		-1.24319	3.76025	0.0819761	0.383143
unitig30_653	1.34	0.42	0.63	1.17		-0.134615	1.61912	1	1		-1.74077	1.11359	0.0967864	0.416191		-1.23692	1.28803	0.21179	0.394542		-1.63734	1.04432	0.122481	0.46892
unitig30_654	20.21	15.43	9.21	9.64		-1.0332	4.74416	0.130628	0.376757		-0.486226	5.01505	0.480673	0.816863		-1.33542	4.76253	0.0527341	0.157036		0.51827	4.49197	0.452241	0.797988
unitig30_655	0.26	3.66	3.89	2.63		3.53694	0.90046	0.00744743	0.066742		3.8499	1.21609	0.00753089	0.11284		3.84469	1.26709	0.00583707	0.0337802		0.278157	1.73101	0.786774	0.961575
unitig30_656	91.08	62.94	43.44	50.32		-0.818203	8.44048	0.214967	0.493228		-0.628744	8.57877	0.339335	0.721914		-1.26669	8.41134	0.0569889	0.164902		0.160626	8.11988	0.807293	0.971525
unitig30_657	12.11	7.43	3.8	13.35		0.177551	3.62606	0.831828	0.950805		-0.798968	3.24519	0.286667	0.675351		-1.86431	2.96702	0.0156387	0.0675553		-1.00559	3.35023	0.16959	0.54392
unitig30_658	11.4	13.44	7.25	2.82		-1.95377	3.18963	0.0096235	0.0780871		0.147546	4.01457	0.851439	0.983423		-0.834169	3.62011	0.24717	0.436238		2.07362	3.37921	0.00538707	0.0720287
unitig30_659	24.86	27.5	19.75	24.26		0.00641637	3.40438	1	1		0.0417326	3.48698	0.973234	1		-0.528047	3.26859	0.48504	0.668755		0.00653455	3.46484	1	1
unitig30_660	220.35	341.1	371.11	153.66		-0.483098	8.0932	0.462952	0.734383		0.533949	8.67335	0.416701	0.769221		0.552709	8.73588	0.400555	0.593675		0.988219	8.47118	0.135137	0.490417
unitig30_661	3.87	10.95	20.13	6.41		0.765732	2.70174	0.362123	0.650883		1.40267	3.19345	0.0650963	0.352546		2.17954	3.83279	0.0040101	0.0260703		0.608178	3.38196	0.40226	0.765604
unitig30_662	13.8	5.3	4.72	5.63		-1.25482	4.13462	0.077689	0.28157		-1.47059	4.13362	0.0392711	0.269391		-1.73613	4.1127	0.0151637	0.0662114		-0.244522	3.34619	0.753221	0.949299
unitig30_663	1.71	1.51	0.74	1.6		-0.0530262	2.57555	1	1		-0.261994	2.5373	0.756575	0.949308		-1.41224	2.14736	0.103178	0.245473		-0.237796	2.48857	0.780694	0.95815
unitig30_664	25.43	23.32	6.01	5.72		-2.11292	5.04998	0.00279489	0.0330963		-0.220029	5.71691	0.745249	0.94163		-2.27517	5.13202	0.00134999	0.0122106		1.86438	4.92929	0.00777553	0.0912846
unitig30_665	20.03	54.25	44.31	17.29		-0.184172	3.76285	0.803283	0.935275		1.33573	4.73505	0.0558535	0.326624		0.942449	4.51834	0.180468	0.356149		1.49129	4.64804	0.0324128	0.227756
unitig30_666	2.89	1.11	7.43	4.31		0.579097	1.55724	0.638759	0.851941		-1.51559	0.762531	0.187026	0.562475		1.14438	2.02083	0.206864	0.388797		-2.12716	1.15166	0.042606	0.266941
unitig30_667	142.67	143.35	123.34	44.43		-1.64137	6.0862	0.0159994	0.10886		-0.089182	6.71062	0.896446	0.999413		-0.407785	6.61545	0.540066	0.712142		1.52347	6.06622	0.0245954	0.19093
unitig30_668	8.96	9.37	12.19	10.08		0.207105	4.2874	0.784926	0.925793		-0.0435235	4.2234	0.967496	1		0.238056	4.42142	0.745039	0.86637		-0.279486	4.30951	0.690573	0.925678
unitig30_669	19.94	10.72	5.63	4.34		-2.1615	4.75089	0.00237592	0.029369		-0.986888	5.11909	0.149772	0.514495		-2.01969	4.88968	0.00418881	0.0267806		1.14614	4.07108	0.104319	0.433797
unitig30_670	10.6	34.82	87.55	3.67		-1.48817	3.45546	0.0440131	0.202465		1.62139	5.11674	0.0202248	0.188906		2.84952	6.16881	6.93e-05	0.00183669		3.08151	4.83236	3.13e-05	0.00147886
unitig30_671	18.02	18.66	16.38	9.67		-0.857523	5.31613	0.204012	0.478215		-0.0453873	5.72809	0.947519	1		-0.335833	5.64229	0.620617	0.778662		0.783391	5.33568	0.24558	0.63878
unitig30_672	5.36	14.45	9.57	3.85		-0.44037	3.37905	0.541636	0.788185		1.32977	4.46173	0.0586981	0.333846		0.640304	4.05835	0.374084	0.56772		1.74169	4.31119	0.0136831	0.131748
unitig30_673	81.88	57.13	113.25	118.98		0.583772	4.96944	0.392654	0.681735		-0.603398	4.43925	0.385507	0.751947		0.274915	4.90998	0.696922	0.833713		-1.21613	4.80306	0.0775504	0.374584
unitig30_674	14.42	7.84	5.16	10.58		-0.414883	3.36529	0.562685	0.803632		-0.990361	3.20071	0.191295	0.566396		-1.66033	3.043	0.0262996	0.0976156		-0.6044	2.94457	0.431572	0.784786
unitig30_675	22.22	27.29	22.7	18.34		-0.240327	5.08252	0.725038	0.896403		0.200182	5.36864	0.771471	0.950597		-0.170142	5.23203	0.811343	0.907682		0.411723	5.23945	0.543422	0.850975
unitig30_676	29.08	13.2	10.22	13.7		-1.04359	4.34841	0.134374	0.382924		-1.23937	4.34834	0.0787559	0.384634		-1.71202	4.26651	0.0165074	0.0704825		-0.224562	3.70624	0.766568	0.954093
unitig30_677	1.64	3.32	3.65	2.63		0.664548	1.32748	0.494712	0.757431		0.841088	1.49462	0.394949	0.752977		0.90193	1.58226	0.343208	0.538122		0.147695	1.66561	0.925108	1
unitig30_678	6.6	9.41	9.33	5.47		-0.217125	2.76237	0.830176	0.950201		0.412711	3.15333	0.584996	0.867895		0.298382	3.13948	0.700494	0.834911		0.601318	3.03213	0.410039	0.769787
unitig30_679	19.2	15.38	15.81	9.32		-0.99967	4.44655	0.147683	0.403224		-0.415563	4.7365	0.543578	0.845776		-0.476403	4.76061	0.489789	0.673262		0.555434	4.23991	0.421417	0.779936
unitig30_680	2.21	0.48	1.25	0.7		-1.50916	1.0416	0.148066	0.403224		-2.20233	0.925404	0.0493358	0.306455		-0.981162	1.2788	0.335879	0.530252		-0.722544	0.0861801	0.7999	0.967513
unitig30_681	9.97	25.86	72.71	6.93		-0.480938	4.58159	0.491616	0.75663		1.28027	5.64812	0.0595712	0.336416		2.66867	6.79553	0.000155931	0.00314981		1.73253	5.49174	0.0116129	0.117614
unitig30_682	81.66	45.81	28.15	36.72		-1.11524	7.07654	0.0941688	0.311736		-0.929039	7.20453	0.161427	0.531016		-1.73462	7.02395	0.0104897	0.0514125		0.157386	6.55992	0.813022	0.973572
unitig30_683	7.22	3.07	7.31	0.79		-3.2423	0.218923	0.0577711	0.237282		-1.50887	0.508909	0.251568	0.64442		-0.287509	0.956131	0.866239	0.940754		1.72934	-0.55927	0.430642	0.784786
unitig30_684	137.33	176.3	88.44	104.38		-0.358805	6.08954	0.591727	0.820754		0.264695	6.46373	0.690685	0.918956		-0.834177	6.01555	0.211827	0.394542		0.594694	6.28931	0.371692	0.7459
unitig30_685	851.51	1397.02	1862.28	1907.21		1.20072	8.88241	0.0705831	0.26642		0.617662	8.56928	0.347982	0.728901		0.929691	8.81754	0.159374	0.328002		-0.6119	9.14904	0.35167	0.73297
unitig30_686	27.8	21.72	14.75	6.17		-2.13241	4.89648	0.00262637	0.0315425		-0.44867	5.46556	0.503729	0.832394		-1.1091	5.26852	0.1045	0.248133		1.65527	4.60212	0.0177332	0.156587
unitig30_687	12.27	15.49	15.77	22.65		0.921183	6.28447	0.16953	0.435789		0.237127	5.9419	0.723008	0.931553		0.160502	5.95204	0.814223	0.909649		-0.712925	6.41758	0.282721	0.676159
unitig30_688	1.67	0.64	0.8	0.76		-0.916594	0.89672	0.479207	0.74714		-1.51559	0.762531	0.187026	0.562475		-1.11131	0.913364	0.283653	0.478484		-0.628251	0.278845	0.822492	0.975608
unitig30_689	123.59	696.83	871.77	825.86		2.77414	7.44108	8.16e-05	0.00233799		2.39577	7.18556	0.000556293	0.0285024		2.61632	7.42409	0.000185279	0.00341841		-0.407241	8.11295	0.535629	0.847422
unitig30_690	13.02	18.87	28.3	7.83		-0.698736	4.22756	0.326566	0.61481		0.430521	4.83654	0.532165	0.83997		0.914066	5.18539	0.182271	0.358374		1.10063	4.55435	0.110973	0.447337
unitig30_691	2.76	3.64	8.29	5.02		0.898977	1.74487	0.348276	0.636137		0.30208	1.46804	0.804303	0.963598		1.3415	2.15327	0.129867	0.287749		-0.6264	1.83811	0.494848	0.826404
unitig30_692	17.11	18.26	21.87	40.76		1.29458	5.19123	0.059571	0.24215		0.00359342	4.47267	1	1		0.165262	4.60763	0.811393	0.907682		-1.31995	5.23398	0.0531465	0.301555
unitig30_693	44.99	33.01	57.39	64.07		0.546454	3.38912	0.449714	0.724513		-0.541474	2.90378	0.491653	0.826341		0.151807	3.28421	0.877429	0.948294		-1.1171	3.22723	0.131422	0.48111
unitig30_694	8.31	9.87	4.01	4.76		-0.760498	4.66727	0.264904	0.554671		0.157911	5.14847	0.819129	0.969874		-1.24438	4.61544	0.0753633	0.200685		0.889716	4.81673	0.192945	0.571088
unitig30_695	42.56	35.48	27.76	17.4		-1.25228	5.41424	0.0665502	0.257638		-0.358383	5.80917	0.593769	0.873755		-0.813407	5.67583	0.227496	0.4128		0.865174	5.22314	0.199196	0.58067
unitig30_696	0.89	0.78	1.25	0.63		-0.40945	0.815714	0.854437	0.960996		-0.367882	0.880558	0.725047	0.931553		0.290274	1.2328	0.884696	0.952387		0.0135423	0.667364	1	1
unitig30_697	4.72	10.14	17.29	3.51		-0.380658	4.49211	0.586476	0.817046		1.01358	5.33249	0.137586	0.495468		1.67933	5.85956	0.0145961	0.0644628		1.36555	5.18656	0.0456993	0.276079
unitig30_698	57	58.82	106.11	33.68		-0.719356	4.5578	0.293328	0.581498		-0.0490014	4.91726	0.959378	1		0.700019	5.38694	0.301024	0.495971		0.64165	4.57769	0.343702	0.725849
unitig30_699	30.89	25.08	23.51	9.64		-1.64389	5.92522	0.0161434	0.109372		-0.396822	6.40894	0.550005	0.849113		-0.590943	6.37878	0.374772	0.567779		1.21835	5.68505	0.0717429	0.355652
unitig30_700	5.93	10.65	4.65	1.67		-1.76881	3.45518	0.0163818	0.110541		0.742438	4.58201	0.281683	0.674324		-0.543863	3.95983	0.44274	0.630977		2.4833	4.11326	0.000765754	0.0178332
unitig30_701	1.65	5.31	7.89	5.29		1.5589	1.04118	0.183672	0.453414		1.43392	1.0285	0.228158	0.616257		1.88443	1.38441	0.0638717	0.177797		-0.154974	1.44685	0.913871	1
unitig30_702	95.13	186.73	222.96	153.51		0.728298	8.44223	0.269203	0.558861		0.876762	8.60355	0.184271	0.560587		1.03007	8.75605	0.119689	0.271435		0.119624	8.88343	0.855528	0.984849
unitig30_703	5.16	4.14	6.94	4.1		-0.307945	2.9096	0.695557	0.883819		-0.401077	2.92935	0.631943	0.896985		0.22997	3.29139	0.757515	0.87391		-0.121878	2.75306	0.925514	1
unitig30_704	0.92	4.61	9.1	8.15		3.27788	2.3316	0.00065691	0.0114283		2.33462	1.65776	0.019615	0.187532		3.21316	2.41113	0.000572185	0.0067894		-0.974106	2.73498	0.192231	0.569969
unitig30_705	173.03	139.37	77.28	242.89		0.52632	7.85801	0.424565	0.710129		-0.408276	7.44747	0.536781	0.842389		-1.36153	7.16088	0.0422531	0.135427		-0.963448	7.75595	0.145712	0.508867
unitig30_706	31.05	51.87	59.56	30.97		0.033072	6.12926	0.964636	1		0.643175	6.53704	0.333095	0.715792		0.739723	6.64817	0.26666	0.460024		0.581286	6.52588	0.381412	0.75349
unitig30_707	5.71	4.02	5.65	3.6		-0.613179	3.59572	0.40226	0.69044		-0.605247	3.66121	0.401264	0.755598		-0.21876	3.88104	0.755926	0.873267		-0.020791	3.31996	1	1
unitig30_708	0	1.16	0.98	0.43		NA	NA	NA	unitig30_708		-0.728015	0.285714	0.674324	unitig30_708		-0.937524	0.52381	0.699292	unitig30_708		-0.727749	0.658385	0.90951
unitig30_709	22.92	29.29	49.41	13.2		-0.760558	5.52453	0.258018	0.546112		0.256797	6.05807	0.704341	0.923984		0.908618	6.50055	0.173738	0.347148		0.988599	5.73699	0.140726	0.503136
unitig30_710	5.14	8.26	17.25	9.72		0.96915	4.1469	0.170746	0.437208		0.600367	3.98255	0.395792	0.753441		1.55771	4.67913	0.0269624	0.0994994		-0.397709	4.40853	0.565869	0.864253
unitig30_711	8.2	4.46	4.47	3.71		-1.11829	3.73622	0.12613	0.369904		-0.97859	3.84428	0.174144	0.548067		-1.07102	3.86093	0.131208	0.28858		0.111063	3.21547	0.890731	0.994985
unitig30_712	1200.72	1262.79	435.19	902.51		-0.374224	9.98785	0.567896	0.80818		-0.0234128	10.2181	0.971687	1		-1.66303	9.67657	0.0132245	0.0602884		0.321973	10.0211	0.62297	0.891454
unitig30_713	22.31	16.84	22.68	19.38		-0.162558	4.83595	0.819821	0.944616		-0.503732	4.74855	0.464173	0.807482		-0.173715	4.94705	0.80107	0.901842		-0.370022	4.64151	0.588372	0.875043
unitig30_714	1.26	0.92	2.74	2.87		1.23244	1.31544	0.21179	0.488701		-0.532191	0.489424	0.822492	0.970337		0.878333	1.21449	0.465039	0.651484		-1.79676	1.14939	0.0837197	0.383909
unitig30_715	10.44	10.54	6.57	9.58		-0.0937667	4.27278	0.90614	0.985539		-0.0945821	4.33772	0.894774	0.999413		-0.875167	4.05387	0.213024	0.39573		-0.0296216	4.27018	0.972982	1
unitig30_716	0	0	0	0		NA	NA	NA	NA		NA	NA	NA	NA		NA	NA	NA	NA
unitig30_717	1.61	2.22	9.03	2.79		0.820306	2.90916	0.292915	0.581336		0.366271	2.70611	0.651311	0.904291		2.27741	4.0875	0.00244311	0.0183916		-0.483087	3.06574	0.513635	0.839974
unitig30_718	6.09	9.33	5.99	6.15		0.049736	3.18383	1	1		0.522906	3.5099	0.484923	0.81942		-0.22376	3.16229	0.769335	0.879154		0.444488	3.49485	0.544275	0.850975
unitig30_719	8.14	5.14	7.42	2.39		-1.74395	2.97252	0.0247327	0.140534		-0.755528	3.33644	0.29842	0.686301		-0.341414	3.55911	0.629284	0.785188		0.96051	2.52651	0.217703	0.604504
unitig30_720	173.45	389.22	563.63	184.66		0.127938	6.98776	0.849215	0.958517		1.06904	7.62075	0.107763	0.439807		1.50007	7.97742	0.0253764	0.0952738		0.912281	7.63826	0.168192	0.540761
unitig30_721	6.08	1.49	4.81	5.67		-0.0617902	1.97983	1	1		-2.10103	1.35216	0.042606	0.28206		-0.531835	1.87123	0.562502	0.729645		-2.07084	1.33943	0.0400936	0.256965
unitig30_722	22.23	112.17	175.38	22.35		0.0474742	5.14813	0.948069	1		2.24017	6.70483	0.00124036	0.041632		2.78269	7.21575	8.15e-05	0.00202204		2.16394	6.68022	0.00167967	0.0310886
unitig30_723	10.87	19.17	11.85	8.23		-0.358348	3.2318	0.636814	0.850728		0.718737	3.8715	0.31939	0.70792		-0.0871258	3.47189	0.918577	0.97503		1.04857	3.71323	0.140578	0.503013
unitig30_724	3.62	4.65	5.1	5.29		0.577836	1.27923	0.573302	0.811221		0.261174	1.17118	0.884696	0.996698		0.290274	1.2328	0.884696	0.952387		-0.345937	1.36644	0.732196	0.939781
unitig30_725	10.77	12.06	11.7	16.15		0.620251	3.36191	0.399195	0.687133		0.0667327	3.11825	0.965974	1		-0.0797268	3.09348	0.929971	0.981572		-0.582516	3.41629	0.429976	0.784786
unitig30_726	3.21	9.57	21.78	9.87		1.62738	2.67261	0.0412252	0.194075		1.45022	2.6178	0.0682262	0.359143		2.54814	3.51353	0.00130183	0.0119791		-0.206357	3.16183	0.802348	0.968875
unitig30_727	12.91	15.82	14.49	6.3		-1.02897	2.85441	0.184097	0.453669		0.180843	3.44373	0.836688	0.976408		-0.0493634	3.37428	0.971028	1		1.18168	3.03545	0.11755	0.460904
unitig30_728	5.38	6.35	8.38	4.69		-0.158963	2.86821	0.841624	0.954261		0.144521	3.0843	0.896145	0.999413		0.425146	3.29033	0.588028	0.750765		0.274845	2.98425	0.716288	0.934048
unitig30_729	69.17	220.33	20.64	9.34		-2.84319	4.99986	0.000102214	0.00273487		1.5748	6.87976	0.0196636	0.187532		-1.94699	5.26029	0.00538405	0.0320504		4.3898	6.495	1.13e-08	1.28e-06
unitig30_730	27.58	18.08	42.29	20.45		-0.394692	4.64991	0.571291	0.810856		-0.708482	4.58528	0.310185	0.698349		0.417395	5.17742	0.543338	0.714456		-0.342625	4.34378	0.615927	0.888868
unitig30_731	8.75	13.88	6.82	6.97		-0.278001	4.37915	0.700753	0.887262		0.575922	4.8964	0.402729	0.756498		-0.548642	4.37571	0.43366	0.623272		0.825206	4.76376	0.230427	0.622369
unitig30_732	3.71	2.53	5.39	2.78		-0.41347	2.08574	0.676811	0.872323		-0.676651	2.03335	0.432544	0.780075		0.318231	2.55639	0.705766	0.837912		-0.291947	1.80259	0.795106	0.966047
unitig30_733	4.91	4.36	3.59	5.34		0.150587	4.12098	0.843741	0.955474		-0.276678	3.97498	0.717973	0.930515		-0.64934	3.86355	0.368455	0.563036		-0.45615	4.04024	0.523657	0.841204
unitig30_734	0.46	0	5.85	4.36		3.15361	0.62013	0.0279694	0.15198		NA	NA	NA	unitig30_734		0.887224	0.0295884	0.10638	unitig30_734		0.381433	0.00199604	0.0349597
unitig30_735	8.61	7.48	19.91	5.48		-0.630643	2.90752	0.407585	0.695204		-0.296207	3.11218	0.700494	0.922449		1.0031	3.89562	0.168062	0.339243		0.305908	2.79323	0.713789	0.933908
unitig30_736	12.08	22.74	58.65	8.58		-0.450911	2.88178	0.585652	0.816474		0.833756	3.63286	0.264057	0.658119		2.0954	4.59544	0.00366987	0.0244975		1.25631	3.45076	0.0802982	0.379002
unitig30_737	11.13	15.36	28.78	4.94		-1.13041	4.11269	0.10483	0.333587		0.372624	4.84104	0.589731	0.869933		1.17707	5.39968	0.0856559	0.217449		1.47453	4.4287	0.0346824	0.236625
unitig30_738	9.8	8.86	9.69	5.45		-0.807735	3.45884	0.271817	0.560425		-0.251266	3.75411	0.738042	0.939105		-0.21968	3.81878	0.766387	0.878652		0.527919	3.36264	0.470342	0.808577
unitig30_739	6.76	24.47	57.45	22.92		1.79271	5.12232	0.0102366	0.0813575		1.75414	5.16156	0.0119236	0.14479		2.88068	6.14011	5.82e-05	0.00163979		-0.0674748	5.76872	0.927278	1
unitig30_740	237.17	151.06	75.44	175.6		-0.395442	6.99116	0.551389	0.794634		-0.746786	6.91565	0.261092	0.656535		-1.85237	6.64207	0.00655406	0.0364143		-0.380184	6.66554	0.566681	0.864628
unitig30_741	3.08	2.32	4.28	2.4		-0.329264	3.2166	0.662457	0.865128		-0.512721	3.19846	0.490487	0.825189		0.263286	3.6274	0.734862	0.858569		-0.212247	3.00709	0.78149	0.958237
unitig30_742	63.96	71.31	25.31	43.71		-0.512361	6.88556	0.440368	0.719636		0.0608044	7.21709	0.928979	1		-1.53643	6.66131	0.0229654	0.0887242		0.544347	6.96755	0.409383	0.769557
unitig30_743	0.77	1.03	0.56	0.41		-0.820935	1.14896	0.465039	0.736174		0.328832	1.71367	0.832809	0.97505		-0.607142	1.31806	0.597593	0.758184		1.12311	1.39264	0.25882	0.649695
unitig30_744	23.09	21.93	6.04	14.09		-0.671761	4.50408	0.334173	0.622892		-0.168616	4.78699	0.81313	0.967064		-2.13202	4.19541	0.00353686	0.024096		0.474426	4.454	0.488093	0.823559
unitig30_745	0.82	1.97	0.99	0.24		-1.83858	0.766124	0.109379	0.342392		1.15999	2.10205	0.202302	0.581532		0.0962847	1.52841	1	1		2.97698	1.70682	0.00194758	0.0344668
unitig30_746	4.19	8.01	7.03	4.44		0.114385	3.004	0.927062	0.994204		0.83972	3.49058	0.2604	0.655575		0.5374	3.3561	0.480071	0.66345		0.69671	3.48989	0.337224	0.721335
unitig30_747	16.23	18.73	12.73	38.91		1.30101	6.55434	0.0528777	0.228219		0.112858	5.88665	0.869814	0.990358		-0.543777	5.6312	0.421792	0.612963		-1.21703	6.63648	0.0690776	0.34895
unitig30_748	111.74	338.12	255.33	85.31		-0.351189	4.02972	0.627557	0.844368		1.50017	5.19788	0.030466	0.23804		0.99248	4.89494	0.148429	0.312363		1.82275	5.07843	0.00862583	0.0981492
unitig30_749	28.09	20.91	20.2	18.48		-0.568884	6.01615	0.39433	0.682241		-0.523968	6.10054	0.431466	0.780075		-0.675712	6.09054	0.31345	0.508375		0.0160983	5.77658	0.985517	1
unitig30_750	21.64	24.31	39.76	24.22		0.187177	3.55275	0.822178	0.945888		0.0600797	3.55127	0.974404	1		0.662459	3.9433	0.36319	0.558611		-0.155937	3.6183	0.853684	0.984798
unitig30_751	67.19	222.86	186.21	87.82		0.424307	7.15985	0.522076	0.776031		1.63412	8.03569	0.0152069	0.162733		1.27257	7.82274	0.0565761	0.164268		1.18099	8.12476	0.0754992	0.368455
unitig30_752	3.42	3.38	2.25	2.41		-0.450911	2.88178	0.585652	0.816474		-0.0834959	3.11325	0.965974	1		-0.803359	2.84554	0.300098	0.495348		0.338859	2.88367	0.665889	0.916205
unitig30_753	4.19	6.45	3.98	7.38		0.843814	2.62153	0.277562	0.566109		0.525006	2.49585	0.515523	0.835519		-0.289857	2.11803	0.743746	0.86637		-0.347859	2.83607	0.659596	0.910502
unitig30_754	11.28	13.79	10.05	3.33		-1.69699	3.05472	0.0244588	0.139824		0.198233	3.84802	0.793314	0.958588		-0.353636	3.62453	0.643788	0.794735		1.86744	3.27632	0.0138192	0.132668
unitig30_755	496.13	111.01	121.6	37.47		-3.6879	8.98958	4.12e-07	2.76e-05		-2.25594	9.22296	0.000985626	0.0382063		-2.22725	9.27923	0.00112885	0.0108585		1.40318	7.12612	0.0364802	0.243153
unitig30_756	3.22	3.48	7.06	2.64		-0.320132	1.62468	0.824298	0.946934		0.00933175	1.83576	1	1		0.901592	2.39373	0.287651	0.481158		0.30124	1.66371	0.77773	0.957459
unitig30_757	0.59	0.58	1.38	0.29		-0.951819	-0.336962	1	1		-0.123721	-0.060366	1	1		0.948866	0.468935	0.63315	0.787054		0.807706	-0.405537	0.726708	0.936767
unitig30_758	5.71	3.23	3.89	1.86		-1.58778	1.85771	0.0611377	0.245567		-0.860279	2.13437	0.290499	0.679199		-0.729906	2.22889	0.356891	0.551949		0.700361	1.39681	0.503	0.832241
unitig30_759	1.98	2.48	2.46	0.06		-4.8145	1.42439	0.000305695	0.00636614		0.228548	2.57476	0.806915	0.964329		0.086721	2.54877	0.950626	0.994956		5.04477	1.76441	2.69e-05	0.00131276
unitig30_760	15.14	64.08	109.11	37		1.31945	4.30952	0.0635337	0.251233		1.98071	4.87329	0.00539292	0.0928802		2.64354	5.46958	0.000228078	0.00384031		0.632398	5.21109	0.347903	0.730174
unitig30_761	0	0	0.89	1.1		5.64353	-0.0789967	0.0565217	0.23632		NA	NA	NA	unitig30_761		-0.218882	0.0942029	0.230654	unitig30_761		-0.2541	0.0347826	0.236625
unitig30_762	2.26	3.77	3.88	3.77		0.778351	2.36344	0.358608	0.648009		0.651658	2.35368	0.474911	0.815067		0.581787	2.36289	0.474911	0.659435		-0.155685	2.6354	0.879539	0.993094
unitig30_763	115.79	146.87	153.83	144.77		0.36008	8.29522	0.583972	0.816474		0.247082	8.29966	0.707218	0.925503		0.210575	8.33131	0.748984	0.86832		-0.141839	8.45668	0.829255	0.979326
unitig30_764	1.7	1.77	2.51	0.75		-1.14739	2.43861	0.157034	0.416345		-0.0575487	2.94153	1	1		0.343944	3.20504	0.650615	0.799319		1.06198	2.46797	0.178922	0.556594
unitig30_765	23.57	12.03	3.84	17.21		-0.413571	2.14497	0.688138	0.878886		-1.05977	1.95178	0.206864	0.588038		-2.77822	1.59047	0.0057595	0.0335371		-0.675311	1.70999	0.45842	0.801472
unitig30_766	66.87	47.67	32.23	11.54		-2.49527	5.8956	0.000403836	0.00786735		-0.58439	6.46759	0.379486	0.748569		-1.25138	6.28502	0.0631063	0.176639		1.88228	5.46785	0.00658883	0.0819635
unitig30_767	21.46	23.2	20.34	27.01		0.369234	4.1856	0.613869	0.83485		0.0162596	4.06234	1	1		-0.275942	3.97049	0.71499	0.845079		-0.381857	4.23226	0.588179	0.875043
unitig30_768	21.18	29.14	44.38	13.97		-0.561782	4.64996	0.415329	0.703306		0.364182	5.16631	0.596181	0.875629		0.868052	5.52307	0.2005	0.381315		0.897253	4.92305	0.185418	0.564795
unitig30_769	1.65	1.51	1.7	1.05		-0.598483	0.744873	0.700311	0.887262		-0.218219	0.943946	0.866239	0.989856		-0.15196	1.01627	1	1		0.353109	0.664804	0.854437	0.984798
unitig30_770	14.43	13.71	11.07	23.71		0.752695	3.64647	0.299211	0.587583		-0.169272	3.20382	0.840181	0.977282		-0.579349	3.0682	0.447167	0.634704		-0.951041	3.61672	0.18699	0.565102
unitig30_771	4.01	5.04	10.17	6.97		0.832513	2.68026	0.290856	0.578768		0.233418	2.3974	0.783156	0.954851		1.14035	3.00177	0.131478	0.28858		-0.628252	2.7782	0.405843	0.767931
unitig30_772	30.85	33.75	55.98	20.22		-0.571601	5.33054	0.401219	0.689073		0.0335579	5.67292	0.963615	1		0.660698	6.07634	0.324467	0.518709		0.576387	5.39797	0.392353	0.759437
unitig30_773	45.36	63.43	85.09	45.55		0.0435569	3.76884	0.977937	1		0.387052	4.02017	0.587042	0.867895		0.707693	4.26254	0.306292	0.501077		0.314742	4.00963	0.656133	0.90951
unitig30_774	34.23	37.52	61.11	44.83		0.426202	4.40899	0.551404	0.794634		0.0362363	4.26372	0.968372	1		0.636587	4.65199	0.356709	0.551949		-0.418849	4.46486	0.541259	0.850622
unitig30_775	47.08	36.44	25.05	24.2		-0.921897	6.54713	0.166839	0.431252		-0.465558	6.78866	0.483154	0.818061		-1.10918	6.60155	0.0968414	0.235081		0.427532	6.30858	0.518397	0.841204
unitig30_776	1.45	3.72	10.06	0.79		-0.801835	-0.0465703	0.769726	0.917838		1.24317	0.90897	0.283653	0.674324		2.56676	1.8909	0.00792498	0.0423659		2.02395	0.654579	0.083497	0.383909
unitig30_777	68.77	157.59	190.67	288.9		2.10723	5.84847	0.00253307	0.0306396		1.09941	5.1653	0.107949	0.439807		1.2715	5.33625	0.0627978	0.176059		-1.03674	6.17146	0.121626	0.46872
unitig30_778	10.76	25.03	44.07	4.64		-1.17502	4.18277	0.0932931	0.310304		1.12166	5.3938	0.100672	0.425703		1.83443	5.96688	0.00760895	0.0409349		2.26821	5.08429	0.00132498	0.0267426
unitig30_779	55.36	77.1	103.39	89.13		0.724646	7.12381	0.275107	0.564309		0.38175	6.98684	0.563515	0.856858		0.702249	7.22839	0.2891	0.48301		-0.371744	7.32732	0.573088	0.868697
unitig30_780	27.74	43.83	49.63	18.7		-0.52996	3.21283	0.469114	0.73933		0.562857	3.83145	0.435981	0.783314		0.639403	3.92918	0.385497	0.580092		1.06436	3.61139	0.141346	0.503512
unitig30_781	28.51	221.86	476.21	167.53		2.59083	6.0136	0.000255235	0.00557627		2.86234	6.31591	6.24e-05	0.00592379		3.86142	7.27088	2.07e-07	2.47e-05		0.242607	6.96923	0.715011	0.934036
unitig30_782	238.43	857.52	793.85	391.77		0.753904	6.31302	0.259619	0.548495		1.7501	7.07887	0.0099146	0.131629		1.53605	6.96883	0.0229395	0.0886645		0.967362	7.26191	0.144744	0.508117
unitig30_783	28.85	41.53	73.05	18.96		-0.566876	3.8029	0.430296	0.714331		0.429075	4.35884	0.548762	0.848573		1.14054	4.85994	0.0968435	0.235081		0.967355	4.11843	0.165089	0.537961
unitig30_784	30.65	99.37	194.75	141.48		2.24284	5.58893	0.00143169	0.0203234		1.59961	5.15393	0.0208964	0.192229		2.4674	5.89586	0.000494276	0.00619415		-0.67217	6.06375	0.314097	0.702905
unitig30_785	2.36	3.92	8.09	4.24		0.881044	3.00096	0.23912	0.524044		0.637043	2.91753	0.43103	0.779951		1.57736	3.6013	0.0350108	0.119051		-0.272985	3.26928	0.715742	0.934048
unitig30_786	26.07	46.11	45.5	26.86		0.0806993	4.78002	0.911195	0.987965		0.725947	5.2147	0.285592	0.674324		0.603841	5.1913	0.375598	0.56893		0.616467	5.21728	0.359444	0.74096
unitig30_787	123.57	75.29	46.65	171.94		0.514199	7.64103	0.435736	0.718298		-0.810722	7.07745	0.221224	0.606129		-1.60405	6.88611	0.0175056	0.073779		-1.35378	7.41298	0.0429953	0.267994
unitig30_788	335.08	1920.18	2468.07	3319.75		3.34601	9.84064	2.94e-06	0.000156578		2.42239	9.09625	0.000441824	0.0242544		2.68175	9.36905	0.000117275	0.00254465		-0.952475	10.3678	0.148715	0.510404
unitig30_789	6.64	12.6	40.56	12.63		0.963324	4.16751	0.170101	0.43657		0.826588	4.14724	0.242359	0.636646		2.4093	5.3737	0.000712245	0.00795764		-0.165632	4.53173	0.820046	0.97538
unitig30_790	11.47	16.39	32.1	12.35		0.144097	4.09957	0.842194	0.954458		0.418905	4.31722	0.549454	0.848958		1.28502	4.92454	0.0632787	0.177031		0.246021	4.35162	0.723245	0.936658
unitig30_791	13.63	22.15	51.67	26.63		1.00201	3.56508	0.170516	0.437016		0.603597	3.3822	0.424256	0.775326		1.72139	4.19655	0.0163982	0.0701222		-0.427394	3.81582	0.563049	0.862089
unitig30_792	14.7	4.35	4.51	10.32		-0.461	4.10522	0.506858	0.765129		-1.83876	3.72106	0.0123917	0.148122		-1.90884	3.75173	0.009138	0.0466748		-1.40691	3.38963	0.0548691	0.305705
unitig30_793	11.66	8.09	5.41	15.84		0.486555	3.00247	0.545785	0.790173		-0.636732	2.51322	0.447595	0.793617		-1.3128	2.31664	0.106088	0.250711		-1.15258	2.803	0.123237	0.469723
unitig30_794	22.27	12.25	11.39	19.24		-0.172205	4.73023	0.805927	0.93639		-0.957167	4.47282	0.165423	0.537686		-1.16038	4.45411	0.095904	0.233807		-0.813872	4.35441	0.242397	0.634786
unitig30_795	15.23	10.26	12.62	12.62		-0.2323	4.20694	0.741792	0.906468		-0.667777	4.08379	0.345148	0.725941		-0.469842	4.21524	0.508124	0.686781		-0.464342	3.93645	0.507513	0.835863
unitig30_796	20.43	25.88	66.32	44.83		1.16249	4.84053	0.0909522	0.307477		0.237026	4.33691	0.747775	0.943395		1.49186	5.1948	0.0316976	0.111401		-0.954414	4.95605	0.160044	0.528514
unitig30_797	11.61	11.63	10.68	14.45		0.353123	6.41476	0.596417	0.823731		-0.0948696	6.2469	0.890192	0.998589		-0.320896	6.19247	0.631478	0.787011		-0.476845	6.42193	0.472603	0.810381
unitig30_798	0	4.03	0	0		NA	NA	NA	unitig30_798		2.78864	3.63e-08	2.05e-05	NA		NA	NA	unitig30_798	9.3186		1.19e-08	1.32e-06
unitig30_799	0.01	3.86	19.58	8.17		7.81345	1.5807	3.57e-05	0.00124932		6.67492	0.67077	0.00286389	0.0664692		8.95739	2.63432	1.12e-07	1.51e-05		-1.242	1.96434	0.130209	0.48111
unitig30_800	453.77	446.95	584.09	630.7		0.512646	8.59756	0.435522	0.718091		-0.11797	8.3275	0.858042	0.98652		0.165303	8.5218	0.801656	0.902142		-0.65946	8.60069	0.316194	0.704436
unitig30_801	1022.92	969.36	496.59	1009.03		0.0179571	8.53204	0.978985	1		-0.173721	8.50553	0.791676	0.958588		-1.24137	8.14904	0.0621476	0.174821		-0.220518	8.4972	0.737055	0.941817
unitig30_802	5.85	16.09	28.53	21.9		1.92758	2.15525	0.0334902	0.17099		1.35262	1.82117	0.147385	0.512309		2.07354	2.39349	0.0158078	0.0681282		-0.604677	2.51404	0.438288	0.787548
unitig30_803	20.3	27.87	43.56	39.29		0.98993	4.74083	0.153177	0.41138		0.361128	4.42234	0.615178	0.885221		0.902107	4.80301	0.193495	0.372671		-0.657724	4.90937	0.328777	0.716279
unitig30_804	82.84	85.32	130.17	126.34		0.646497	6.4805	0.33258	0.621841		-0.0534535	6.16104	0.939367	1		0.453048	6.48393	0.495099	0.677486		-0.728813	6.50821	0.273389	0.66682
unitig30_805	88.26	80.61	131.78	81.21		-0.0823338	5.32411	0.908039	0.985554		-0.226875	5.32128	0.742064	0.940964		0.379231	5.68545	0.576712	0.741337		-0.173375	5.2596	0.802273	0.968875
unitig30_806	167.03	370.79	381.89	602.5		1.88843	8.51644	0.00530076	0.0515149		1.0543	7.97212	0.11211	0.446152		0.994069	7.98323	0.133719	0.292602		-0.862981	8.86436	0.190684	0.567966
unitig30_807	118.29	70.55	53.95	152.06		0.399988	7.95148	0.543573	0.788185		-0.841638	7.44311	0.2034	0.58329		-1.33135	7.33642	0.0464457	0.144763		-1.27048	7.69962	0.0566023	0.309942
unitig30_808	17.58	32.37	55.17	33.79		0.979161	3.94148	0.17171	0.439061		0.783404	3.8837	0.269712	0.664379		1.44955	4.38782	0.040822	0.132138		-0.224673	4.28033	0.748257	0.947249
unitig30_809	342.33	516.06	497.09	702.53		1.0748	9.03717	0.10454	0.332912		0.495979	8.7381	0.450401	0.796517		0.339173	8.69978	0.605563	0.765561		-0.607664	9.2663	0.354917	0.735068
unitig30_810	46.29	19.82	21.32	39.66		-0.185225	5.98822	0.783466	0.925039		-1.31946	5.62584	0.0523881	0.316349		-1.31646	5.67698	0.0528677	0.157273		-1.16313	5.48812	0.0863919	0.389453
unitig30_811	18.35	16.2	20.53	15.94		-0.165037	6.97205	0.804017	0.935275		-0.275618	6.98743	0.677729	0.912176		-0.037337	7.15173	0.95796	0.999058		-0.139418	6.88152	0.834272	0.979935
unitig30_812	31.97	23.27	36.65	16.45		-0.921703	6.62681	0.166365	0.430345		-0.554496	6.8314	0.401904	0.756498		-0.00127333	7.13372	1	1		0.338397	6.33789	0.611796	0.885631
unitig30_813	14.29	9.35	11.94	14.06		0.0142649	5.11428	0.991143	1		-0.707126	4.85868	0.30176	0.688484		-0.457599	5.01072	0.504291	0.684874		-0.750279	4.85531	0.271947	0.666269
unitig30_814	17.46	7.53	8.48	38.26		1.16664	3.55794	0.114424	0.350208		-1.30234	2.40353	0.0973092	0.417166		-1.23571	2.46809	0.131019	0.28858		-2.49888	3.29385	0.00127154	0.0258486
unitig30_815	71.81	195.74	321.13	201.05		1.52272	7.55872	0.0235013	0.13666		1.35033	7.50027	0.0436841	0.286728		1.96172	8.01477	0.00393595	0.0257372		-0.201232	8.09029	0.759735	0.952457
unitig30_816	42.43	47.01	76.02	53.76		0.378514	4.55051	0.587672	0.818039		0.0515448	4.44034	0.943842	1		0.64176	4.82381	0.349471	0.544719		-0.35584	4.61452	0.608597	0.885527
unitig30_817	628.08	705.11	499.13	7031.44		3.52241	11.1991	1.03e-06	6.19e-05		0.0707604	8.65976	0.914736	1		-0.530397	8.43394	0.419998	0.611719		-3.4805	11.2646	1.31e-06	8.91e-05
unitig30_818	12.77	5.18	7.06	5.64		-1.13529	2.55529	0.155007	0.413299		-1.39246	2.52994	0.0747839	0.373991		-1.04992	2.68411	0.165578	0.336187		-0.285802	1.864	0.802807	0.969291
unitig30_819	21.43	17.83	17.41	15.65		-0.415474	4.82494	0.550317	0.794601		-0.361767	4.9137	0.599285	0.877505		-0.498227	4.90506	0.465021	0.651484		0.0249106	4.6797	0.979565	1
unitig30_820	662.46	1080.72	950.64	1263.81		0.969538	10.0895	0.141845	0.396003		0.609943	9.92866	0.352934	0.730401		0.322153	9.81311	0.622976	0.780312		-0.388436	10.3752	0.553115	0.856237
unitig30_821	6.91	11.26	19.6	15.7		1.22066	5.64043	0.0725859	0.271802		0.607514	5.30858	0.368834	0.742308		1.30417	5.81876	0.0554627	0.162635		-0.642038	5.89319	0.336765	0.720897
unitig30_822	22.45	30.63	69.3	53.21		1.28189	5.34049	0.0607113	0.244878		0.351606	4.81675	0.612671	0.883576		1.4264	5.56383	0.0363936	0.122186		-0.959209	5.49342	0.156292	0.523377
unitig30_823	165.46	105.04	109.02	320.75		0.992522	7.39646	0.135811	0.385579		-0.751434	6.55429	0.258127	0.652184		-0.800588	6.58699	0.228582	0.413854		-1.77284	7.23941	0.00887126	0.0996048
unitig30_824	99.63	77.23	142.58	123.02		0.341668	5.50257	0.613705	0.834762		-0.463292	5.17236	0.498886	0.829416		0.317951	5.60741	0.639791	0.791252		-0.833848	5.36439	0.216195	0.603187
unitig30_825	2151.88	3571.98	1140.98	3589.45		0.775825	9.56057	0.238561	0.523913		0.634975	9.5402	0.333875	0.716027		-1.11418	8.78659	0.0927657	0.229053		-0.169692	9.87661	0.795552	0.966175
unitig30_826	4.54	7.04	8.9	9.4		1.08217	2.63267	0.180992	0.450695		0.532342	2.35918	0.527497	0.836829		0.768026	2.55243	0.37428	0.56772		-0.579029	2.82476	0.447167	0.793745
unitig30_827	5.19	6.45	19.04	3.36		-0.589677	2.23623	0.499294	0.759262		0.215064	2.67605	0.816944	0.969079		1.67112	3.67055	0.0258833	0.0965671		0.776602	2.41265	0.312663	0.701473
unitig30_828	4.3	7.1	17.75	6.67		0.664548	1.32748	0.494712	0.757431		0.62038	1.36542	0.597593	0.875876		1.8333	2.21389	0.0334902	0.115783		-0.0731989	1.56143	1	1
unitig30_829	4.46	15.42	25.8	27.44		2.64107	2.53363	0.00219265	0.0277969		1.67954	1.87762	0.0706332	0.363475		2.31797	2.40837	0.00823406	0.0434709		-0.991572	2.87787	0.186235	0.565102
unitig30_830	13.32	16.54	18.07	17.58		0.437569	3.69124	0.555962	0.799296		0.215454	3.63356	0.784749	0.955534		0.240356	3.69786	0.745165	0.86637		-0.250996	3.81978	0.729319	0.938581
unitig30_831	149.08	192.88	112.17	258.96		0.834333	9.63023	0.205348	0.480201		0.275547	9.36481	0.674297	0.911498		-0.609209	8.9988	0.354059	0.549047		-0.587629	9.78583	0.370637	0.7459
unitig30_832	208.03	321.43	343.32	113.13		-0.840985	7.29739	0.20416	0.478429		0.531576	8.01527	0.419713	0.771527		0.523822	8.06209	0.426465	0.617985		1.34375	7.70261	0.0441906	0.272043
unitig30_833	54.75	85.53	144.4	53.23		-0.00293884	6.08967	1	1		0.547241	6.45783	0.410938	0.764204		1.19993	6.93108	0.0729598	0.19631		0.521363	6.43296	0.433037	0.785622
unitig30_834	14.07	44.96	87.45	66.4		2.27232	4.11585	0.0022678	0.0282325		1.57676	3.6496	0.0327547	0.249691		2.43311	4.37163	0.000979641	0.00989425		-0.724677	4.55416	0.295525	0.68691
unitig30_835	6.19	34.95	77.14	58.18		3.26408	4.68471	1.88e-05	0.000742157		2.39574	4.01465	0.00136313	0.0439843		3.43488	4.9607	6.85e-06	0.000342351		-0.897534	5.19473	0.187459	0.565493
unitig30_836	436.93	726.55	493.48	1013.73		1.25186	10.416	0.0592844	0.241101		0.637509	10.079	0.331687	0.715693		-0.0233099	9.76503	0.971917	1		-0.643188	10.6863	0.327146	0.713826
unitig30_837	12.24	29.7	53.77	30.99		1.38033	5.85789	0.0415026	0.194947		1.18495	5.78772	0.0805421	0.387979		1.93818	6.39896	0.00489796	0.0299382		-0.224259	6.3349	0.73822	0.941879
unitig30_838	2.43	3.95	10.3	1.56		-0.564104	1.89709	0.508053	0.765975		0.624203	2.55454	0.447595	0.793617		1.90497	3.48776	0.0120401	0.0562799		1.16052	2.32398	0.143002	0.50608
unitig30_839	834.57	860.63	855.27	799.94		-0.0236047	10.3228	0.971435	1		-0.0517946	10.3758	0.93708	1		-0.163705	10.3733	0.802546	0.902904		-0.0570297	10.3451	0.930683	1
unitig30_840	20.9	10.26	24.57	8.11		-1.31583	3.64258	0.0725959	0.271802		-1.13448	3.75901	0.116457	0.454957		0.0264222	4.293	0.984254	1		0.152772	3.01373	0.87526	0.992639
unitig30_841	31.9	54.6	54.78	18.49		-0.752348	5.14521	0.270238	0.560425		0.676127	5.91974	0.313373	0.701214		0.579889	5.91273	0.384503	0.579521		1.39976	5.64777	0.0395998	0.255935
unitig30_842	4.31	11.46	3.84	20.49		2.26569	4.20663	0.00205538	0.0267769		1.28854	3.53849	0.0845225	0.395034		-0.389506	2.62096	0.633648	0.787178		-1.00628	4.54618	0.141316	0.503512
unitig30_843	3.04	2.54	1.85	1.54		-0.931911	2.79438	0.241368	0.525592		-0.353752	3.08598	0.631262	0.896366		-0.907447	2.90714	0.232659	0.418451		0.549835	2.64082	0.50907	0.836718
unitig30_844	6.99	10.24	6.44	5.85		-0.219842	3.59574	0.756587	0.913348		0.444544	4.00854	0.536605	0.842389		-0.319072	3.66317	0.652863	0.801228		0.635728	3.89082	0.364382	0.743343
unitig30_845	5.14	6.09	3.75	4.86		-0.0401758	2.96347	1	1		0.129702	3.11431	0.89815	0.999413		-0.650703	2.79783	0.398232	0.591344		0.141166	3.06686	0.879524	0.993094
unitig30_846	12.49	16.93	13.9	17.5		0.531798	4.43749	0.443676	0.721012		0.350871	4.4	0.623683	0.890729		-0.0340384	4.24576	0.98382	1		-0.209792	4.62887	0.770107	0.95465
unitig30_847	3.09	3.08	7.6	7.23		1.25201	3.97534	0.0813113	0.28888		-0.119646	3.22785	0.90545	1		1.08536	3.98268	0.131143	0.28858		-1.40082	3.96982	0.0482069	0.284019
unitig30_848	66.71	53.5	80.17	96.51		0.569552	7.12409	0.388721	0.678636		-0.414677	6.68468	0.532756	0.83997		0.0650173	6.96214	0.924428	0.977545		-1.01309	7.02215	0.127411	0.475813
unitig30_849	74.25	79.2	54.78	168.92		1.2249	4.84991	0.0768063	0.279551		0.000676798	4.17899	1	1		-0.629919	3.94151	0.379704	0.57392		-1.25322	4.88912	0.069156	0.34895
unitig30_850	56.82	64.15	33.98	49.07		-0.173852	8.6064	0.791434	0.927992		0.079159	8.79775	0.904478	1		-0.94042	8.41337	0.154917	0.32151		0.224174	8.69569	0.73271	0.940091
unitig30_851	0.39	0.92	0.77	1.77		2.10887	1.92085	0.0200777	0.124635		1.02939	1.25584	0.302645	0.688914		0.699456	1.11007	0.63922	0.790892		-1.10989	2.12403	0.173951	0.550172
unitig30_852	6.25	2.46	4.12	1.05		-2.46169	1.18116	0.0182584	0.118024		-1.44572	1.43558	0.124578	0.471524		-0.787839	1.69321	0.393996	0.587876		0.992681	0.356731	0.390133	0.758345
unitig30_853	16.59	40.03	61.86	32.42		1.00527	6.73475	0.132573	0.378939		1.17591	6.91795	0.0790909	0.385555		1.70156	7.35257	0.0118654	0.0558533		0.141797	7.28263	0.830716	0.979736
unitig30_854	72.77	37.09	49.99	19.27		-1.88195	5.78127	0.00630523	0.0588419		-1.06761	6.06541	0.111779	0.446152		-0.737748	6.2324	0.267656	0.461521		0.785633	5.07342	0.247742	0.640956
unitig30_855	22.67	25.39	26.2	12.91		-0.774784	7.83244	0.240872	0.525592		0.0678922	8.27004	0.918514	1		0.00970398	8.29187	0.989226	1		0.813851	7.92038	0.217818	0.604504
unitig30_856	0	0	0	0		NA	NA	NA	NA		NA	NA	NA	NA		NA	NA	NA	NA
unitig30_857	39.72	43.73	31.47	15.32		-1.33616	4.3709	0.0584335	0.238674		0.0350972	4.97953	0.970791	1		-0.534925	4.76602	0.439422	0.628571		1.34272	4.45072	0.0524913	0.299038
unitig30_858	9.11	19.27	45.32	14.74		0.738906	3.99985	0.299879	0.588004		0.989009	4.22828	0.159563	0.529829		2.12167	5.11419	0.00274193	0.019985		0.221263	4.47943	0.756782	0.951228
unitig30_859	16.34	42.62	25.73	5.43		-1.55314	3.15885	0.0392082	0.187928		1.28205	4.59105	0.0686953	0.360714		0.452118	4.10885	0.527543	0.700597		2.80735	4.24891	0.000180132	0.00587299
unitig30_860	29.32	38.32	24.73	9.56		-1.58435	4.94302	0.0222334	0.132011		0.290412	5.75297	0.670516	0.90926		-0.443931	5.44378	0.509825	0.688716		1.84619	5.21551	0.00792934	0.0920475
unitig30_861	35.31	76.86	77.51	25.26		-0.448462	4.9821	0.517774	0.774691		1.02225	5.85734	0.130103	0.482511		0.932659	5.84968	0.165965	0.336611		1.44199	5.695	0.0339458	0.234171
unitig30_862	6.59	15.9	10.49	10.09		0.640783	2.74383	0.438288	0.718557		1.17227	3.15226	0.116408	0.454957		0.472433	2.76209	0.581299	0.74564		0.502738	3.32046	0.497893	0.828572
unitig30_863	7.47	11.23	16.78	4.95		-0.561458	3.44606	0.446606	0.722413		0.49066	4.03539	0.497115	0.828765		0.970465	4.3862	0.164607	0.334899		1.0236	3.80089	0.149342	0.511555
unitig30_864	0.59	0.66	1.04	0.58		-0.000756417	1.12972	1	1		-0.0124896	1.17942	1	1		0.603614	1.55159	0.545468	0.715153		-0.0403034	1.13353	1	1
unitig30_865	25.41	6.58	4.44	7.49		-1.70493	3.36285	0.0245814	0.140051		-2.03022	3.34519	0.00731991	0.112157		-2.68118	3.27372	0.000640652	0.00737489		-0.353961	2.23481	0.697454	0.92845
unitig30_866	20.03	7.01	10.56	5.81		-1.76397	3.69499	0.0166547	0.111706		-1.61637	3.79023	0.0259384	0.217328		-1.12409	3.98218	0.114187	0.263037		0.119095	2.73247	0.887266	0.99423
unitig30_867	55.02	18.27	21.01	16.66		-1.68924	5.46336	0.0137696	0.098769		-1.68493	5.52864	0.0141347	0.155651		-1.59074	5.60206	0.0205824	0.0820588		-0.0244563	4.45065	0.976099	1
unitig30_868	0.67	0.57	0.46	0.61		-0.189785	0.576445	1	1		-0.314777	0.572818	1	1		-0.857	0.413245	0.63315	0.787054		-0.153446	0.446094	1	1
unitig30_869	5.8	8.17	12.48	6.04		0.100628	3.96394	0.903268	0.983532		0.405371	4.1965	0.571789	0.862742		0.909264	4.55665	0.186755	0.363845		0.275969	4.21139	0.697897	0.92845
unitig30_870	39.07	17.07	20.92	56.16		0.556228	5.33318	0.412326	0.699623		-1.29099	4.57962	0.0654293	0.353001		-1.10875	4.68594	0.107344	0.252482		-1.87625	4.98862	0.00714525	0.0864618
unitig30_871	176.45	767.34	912.61	711.96		2.04843	6.86589	0.00287091	0.0337601		2.0227	6.91289	0.00316621	0.0713789		2.16998	7.08355	0.0016375	0.0141662		-0.0545941	7.58323	0.935036	1
unitig30_872	193.36	981.86	1159.22	1269.42		2.75421	8.05027	8.54e-05	0.00242301		2.2496	7.68996	0.00108883	0.0395062		2.38628	7.85513	0.000561645	0.00670183		-0.533471	8.6682	0.416817	0.774866
unitig30_873	0.39	3.11	7.87	3.28		3.04143	1.29141	0.0144137	0.101303		2.85439	1.22402	0.0182584	0.181049		4.07597	2.26903	0.000154728	0.00313297		-0.219097	1.89287	0.870304	0.990962
unitig30_874	0	0	0.47	0		NA	NA	NA	NA		NA	NA	unitig30_874	4.38156		0.285714	0.47943	NA	NA		NA
unitig30_875	2.48	5.46	9.11	1.28		-0.766288	0.822663	0.580436	0.813861		1.08568	1.79529	0.248713	0.641237		1.72924	2.29038	0.0497057	0.150986		1.82642	1.54166	0.0380057	0.249664
unitig30_876	19.12	28.81	46.31	39.57		1.08983	4.74016	0.115316	0.351857		0.499657	4.43479	0.474777	0.815067		1.07801	4.85231	0.118483	0.269494		-0.619098	4.95546	0.36157	0.741322
unitig30_877	30.62	98.54	122.25	70.36		1.23894	6.49419	0.0655225	0.255179		1.59096	6.81691	0.0188631	0.185213		1.79816	7.02641	0.00812998	0.0431092		0.323172	7.21211	0.62449	0.891512
unitig30_878	42.62	44.86	30.31	71.06		0.772614	5.6987	0.251885	0.539025		-0.0270076	5.31378	0.96902	1		-0.692627	5.06893	0.307864	0.502872		-0.828509	5.73463	0.216049	0.603058
unitig30_879	14.01	28.87	46.96	9.25		-0.570001	2.79705	0.460787	0.733063		0.950996	3.67334	0.188534	0.5644		1.54177	4.13623	0.0330827	0.114795		1.49275	3.46638	0.0413857	0.262007
unitig30_880	12.47	24.02	44.18	29.23		1.25771	5.12288	0.0679977	0.260263		0.843649	4.91292	0.219714	0.604654		1.61739	5.50408	0.0191135	0.0780361		-0.442962	5.46367	0.50688	0.835429
unitig30_881	97.06	157.08	84.2	48.88		-0.955363	4.4918	0.172318	0.439314		0.599465	5.29386	0.375341	0.74319		-0.407934	4.82029	0.553354	0.722588		1.52622	4.95917	0.0277111	0.207149
unitig30_882	3.97	3.82	3.13	1.52		-1.30017	1.98928	0.129437	0.376207		-0.15548	2.48693	0.897076	0.999413		-0.556342	2.35306	0.527497	0.700597		1.11737	1.9608	0.198245	0.58067
unitig30_883	5.58	6.57	3.24	6.42		0.24295	4.69007	0.73267	0.900527		0.139545	4.70103	0.848072	0.981616		-0.985604	4.2598	0.158704	0.326966		-0.132246	4.79798	0.849618	0.984192
unitig30_884	9.33	4.46	11.86	6.61		-0.469151	3.29111	0.542502	0.788185		-1.16537	3.09056	0.123716	0.470247		0.139292	3.69609	0.860345	0.935893		-0.725196	2.79587	0.335692	0.71991
unitig30_885	2.61	1.53	1.78	5.36		1.0765	3.45595	0.137938	0.38875		-0.883339	2.50357	0.249994	0.642754		-0.747938	2.60086	0.336064	0.530252		-1.98944	3.25267	0.00897806	0.100405
unitig30_886	13.26	1.69	2.04	4.66		-1.52013	1.9276	0.0740011	0.272884		-3.19672	1.66799	0.00141891	0.0449269		-2.95438	1.73056	0.00330473	0.0229187		-1.70854	0.608631	0.146765	0.509411
unitig30_887	2.82	2.66	4.53	1.85		-0.597055	2.18058	0.483994	0.750719		-0.186193	2.41911	0.839045	0.977037		0.496001	2.83133	0.528051	0.700597		0.38258	2.12748	0.669495	0.917451
unitig30_888	4.23	6.68	12.55	3.54		-0.231758	3.96673	0.754371	0.912267		0.559365	4.4528	0.426189	0.776056		1.36311	5.03336	0.049867	0.151313		0.762437	4.33483	0.2688	0.663224
unitig30_889	9.34	11.49	5.93	6.37		-0.511938	5.13729	0.454997	0.729427		0.202311	5.54355	0.771103	0.950597		-0.85446	5.11924	0.209342	0.391725		0.685489	5.30561	0.313142	0.702168
unitig30_890	1.82	5.02	1.14	1.11		-0.951819	-0.336962	1	1		1.30252	0.623372	0.390133	0.752977		-1.13996	-0.329382	0.726708	0.852987		2.23756	0.351264	0.0999758	0.423491
unitig30_891	0	0.18	1.12	0		NA	NA	NA	NA		NA	NA	unitig30_891	5.34653		0.0942029	0.230654	NA	NA		NA
unitig30_892	4.5	6.16	4.03	33.25		2.90758	2.75181	0.000639659	0.0111742		0.34548	1.05389	0.876186	0.9932		-0.413943	0.746998	0.700311	0.834911		-2.59334	2.77259	0.00121658	0.0250315
unitig30_893	3.43	5.21	6.81	2.7		-0.324348	2.58716	0.721106	0.896403		0.501268	3.07748	0.536462	0.842358		0.788049	3.30343	0.309795	0.504375		0.79723	2.91905	0.288451	0.67979
unitig30_894	14.68	15.27	14.99	12.07		-0.243586	5.7899	0.721068	0.896403		-0.0394698	5.95373	0.960024	1		-0.166512	5.94318	0.80848	0.906929		0.1753	5.81565	0.795094	0.966047
unitig30_895	0	0	0	0		NA	NA	NA	NA		NA	NA	NA	NA		NA	NA	NA	NA
unitig30_896	17.1	42.64	55.57	40.92		1.29432	5.63183	0.0576159	0.237282		1.21995	5.64745	0.0725859	0.369219		1.50064	5.90045	0.0275185	0.100719		-0.103235	6.14045	0.880065	0.993384
unitig30_897	2.15	5.75	4.31	4.31		0.975857	1.91477	0.293949	0.581637		1.23768	2.15376	0.162194	0.53251		0.729417	1.88129	0.438358	0.627684		0.232886	2.42111	0.816944	0.973736
unitig30_898	8.11	5.75	10.63	17.3		1.13811	3.53861	0.125463	0.369361		-0.584059	2.66154	0.454799	0.799895		0.205499	3.08834	0.791892	0.896505		-1.7516	3.40575	0.0174414	0.155632
unitig30_899	28.95	28.33	42.66	28.98		0.0386118	2.57168	1	1		-0.127606	2.55166	0.902795	1		0.358499	2.85697	0.682082	0.823192		-0.195044	2.54524	0.830176	0.979704
unitig30_900	14.57	14.33	12.13	7.21		-0.982052	4.25769	0.162663	0.424479		-0.127998	4.67381	0.868631	0.990286		-0.46798	4.56915	0.502838	0.683667		0.825434	4.22843	0.24057	0.632737
unitig30_901	17.47	43.6	40.98	29.57		0.785021	4.50621	0.265242	0.554693		1.21603	4.85994	0.0787552	0.384634		1.0238	4.78097	0.135971	0.296393		0.402178	5.10769	0.550606	0.853903
unitig30_902	133.54	163.07	155.27	93.56		-0.475704	7.78325	0.470359	0.740091		0.192192	8.16802	0.770484	0.950597		0.0187831	8.1294	0.978304	1		0.639068	7.94322	0.332115	0.718658
unitig30_903	35.11	29	24.34	14.72		-1.21809	5.85769	0.0710198	0.267792		-0.371494	6.23618	0.576257	0.86485		-0.726793	6.14163	0.276913	0.470903		0.817843	5.65811	0.223462	0.614032
unitig30_904	33.79	183.15	385.06	42.12		0.356793	5.71036	0.598665	0.825063		2.34193	7.18637	0.000728762	0.0319221		3.31095	8.083	4.19e-06	0.000250192		1.95634	7.22022	0.00408466	0.0587872
unitig30_905	225.65	967.47	1269.19	942.11		2.0987	6.30263	0.00242986	0.0297746		2.00411	6.2948	0.00372158	0.0765518		2.29207	6.5803	0.00098546	0.00989425		-0.123473	6.99351	0.852558	0.98464
unitig30_906	34.57	21.99	19.19	14.19		-1.24994	5.2652	0.0670351	0.258947		-0.747959	5.49991	0.266525	0.660353		-1.04248	5.44562	0.123772	0.277726		0.473245	4.8375	0.486146	0.821675
unitig30_907	60.72	31.32	24.15	26.02		-1.18748	5.93446	0.0781381	0.282256		-1.04991	6.04372	0.1185	0.458739		-1.52833	5.95315	0.0242324	0.0920178		0.108778	5.34658	0.877351	0.993094
unitig30_908	0	0	0	0		NA	NA	NA	NA		NA	NA	NA	NA		NA	NA	NA	NA
unitig30_909	44.32	49.63	45.39	60.99		0.495198	5.45124	0.460239	0.733016		0.0634755	5.28061	0.928639	1		-0.165815	5.21793	0.809586	0.906929		-0.460588	5.52273	0.495618	0.827364
unitig30_910	10.23	16.63	10	9.16		-0.118767	5.59701	0.866974	0.967267		0.604819	6.05664	0.366357	0.742308		-0.232496	5.66039	0.733184	0.858189		0.694789	5.98568	0.299683	0.692061
unitig30_911	67.3	243.12	260.53	50.76		-0.368248	5.04087	0.590415	0.819994		1.75559	6.40955	0.0102373	0.13274		1.7522	6.45877	0.0101995	0.0505822		2.09512	6.30094	0.00234868	0.0396608
unitig30_912	0.26	0.75	2.12	0.3		0.559569	-0.196955	1	1		1.72843	0.450799	0.333681	0.715792		3.13217	1.49352	0.00728936	0.0395921		1.1426	0.438022	0.305221	0.696276
unitig30_913	44.04	19.55	11.98	6.25		-2.78015	4.44477	0.000186356	0.00435261		-1.26102	4.82283	0.0667697	0.356991		-2.08396	4.66745	0.00353697	0.024096		1.49102	3.50445	0.0405778	0.259019
unitig30_914	12.64	5.84	5.97	6.22		-0.980961	3.64708	0.181074	0.450695		-1.21878	3.62921	0.0917383	0.406689		-1.28887	3.65493	0.0725959	0.195836		-0.266574	3.03512	0.725938	0.936767
unitig30_915	2.7	2.71	2.62	1.2		-1.10254	1.15539	0.302645	0.590465		-0.0730741	1.61067	1	1		-0.224501	1.58491	0.909315	0.96954		1.0031	1.17245	0.285115	0.676159
unitig30_916	69.78	67.42	82.08	80.21		0.240053	5.92517	0.720702	0.896403		-0.145457	5.79506	0.834088	0.97505		0.0357849	5.93563	0.959096	0.999677		-0.414363	5.90779	0.533788	0.84691
unitig30_917	1.6	2.58	3.35	3.73		1.25333	1.97057	0.165529	0.429042		0.589443	1.62683	0.567307	0.859366		0.865636	1.8424	0.371253	0.565376		-0.693458	2.14343	0.405182	0.767447
unitig30_918	2.3	1.76	1.66	2.07		-0.074222	1.73609	1	1		-0.446483	1.62523	0.656347	0.904744		-0.608378	1.6016	0.567307	0.733918		-0.401229	1.56539	0.686852	0.924555
unitig30_919	239.95	185.67	64.08	249.12		0.0919676	9.31655	0.888711	0.976814		-0.46593	9.1223	0.477795	0.815755		-2.10343	8.68867	0.00204305	0.0164296		-0.586739	9.16039	0.37169	0.7459
unitig30_920	60.08	65.12	23.26	45.83		-0.353215	6.6292	0.595094	0.823624		0.0203594	6.8723	0.976121	1		-1.56572	6.32863	0.0209162	0.0830656		0.344753	6.6872	0.603939	0.882568
unitig30_921	33.43	34.48	38.69	19.97		-0.709033	4.1045	0.318402	0.607192		-0.0496877	4.4598	0.958365	1		0.0129978	4.54205	0.986744	1		0.630689	4.12536	0.373823	0.7459
unitig30_922	316.9	1195.43	1671.2	1005.05		1.70225	7.93573	0.0115855	0.0884875		1.81909	8.09301	0.00719946	0.111269		2.19964	8.44881	0.00132922	0.012093		0.0880008	8.65379	0.893719	0.995147
unitig30_923	23.88	60.68	204.04	31.03		0.418543	6.10186	0.528586	0.778469		1.25088	6.70114	0.0627611	0.346625		2.89742	8.07132	4e-05	0.00124999		0.803517	6.81124	0.225184	0.615485
unitig30_924	4.2	11.4	16.32	6.78		0.731979	4.52509	0.294305	0.581751		1.34284	5.00126	0.0527589	0.318109		1.75857	5.36084	0.0112803	0.0540995		0.582042	5.21227	0.387045	0.757665
unitig30_925	3.88	2.22	1.57	0.34		-3.41277	1.06824	0.00753089	0.0670955		-0.922418	1.60142	0.369464	0.742308		-1.51524	1.45415	0.104627	0.248251		2.47594	0.509614	0.0536329	0.302895
unitig30_926	33.33	42.41	108.81	3.76		-3.10943	4.98986	2.76e-05	0.00103174		0.254488	6.04148	0.705346	0.924782		1.5101	6.9041	0.0253503	0.0952738		3.33582	5.27292	7.61e-06	0.000436309
unitig30_927	7.01	16.68	21.6	5.01		-0.44037	3.37905	0.541636	0.788185		1.14611	4.3339	0.101748	0.427522		1.41636	4.57601	0.0437634	0.139111		1.55801	4.17396	0.027453	0.205764
unitig30_928	94.02	84.63	49.74	35.18		-1.37915	5.09074	0.044273	0.202888		-0.245352	5.57394	0.71434	0.929191		-1.11869	5.28352	0.100001	0.240362		1.10513	4.97077	0.10511	0.43528
unitig30_929	2.88	2.96	1.51	1.89		-0.560451	1.0217	0.745855	0.906854		-0.0571263	1.28782	1	1		-1.11131	0.913364	0.283653	0.478484		0.47593	1.02566	0.779001	0.957459
unitig30_930	21.93	24.03	22.64	6.1		-1.78161	3.32578	0.0183763	0.118064		0.0353427	4.05338	0.981814	1		-0.155474	4.00879	0.830445	0.917621		1.78902	3.423	0.0165755	0.149639
unitig30_931	84.1	43.8	28.82	132.85		0.696804	4.73864	0.307194	0.595991		-1.02702	3.9808	0.149668	0.514495		-1.73284	3.82269	0.0167567	0.071439		-1.75291	4.47238	0.0123708	0.123152
unitig30_932	53.08	12.55	12.11	17.83		-1.53883	6.20353	0.0234268	0.136478		-2.17365	6.12912	0.00173809	0.0506683		-2.32966	6.15182	0.000828781	0.00878923		-0.663665	5.01575	0.327592	0.714432
unitig30_933	2.75	2.18	0.59	0.75		-1.75778	1.38793	0.0694193	0.263556		-0.462062	1.856	0.63737	0.898309		-2.42629	1.32507	0.0191124	0.0780361		1.27019	1.17023	0.177284	0.553532
unitig30_934	24.62	20.05	16.52	13.51		-0.825884	4.28968	0.238363	0.523913		-0.395538	4.52703	0.571997	0.862742		-0.776508	4.42104	0.265441	0.458189		0.401656	4.10537	0.567616	0.864635
unitig30_935	0.26	0	0.74	0		NA	NA	NA	NA		NA	NA	unitig30_935	1.30419		0.658385	0.804862	NA	NA		NA
unitig30_936	6.9	5.83	5.7	1.74		-1.90444	2.67116	0.0150262	0.104565		-0.34592	3.24277	0.636814	0.898309		-0.469272	3.23676	0.550817	0.720162		1.53117	2.50004	0.0540956	0.303942
unitig30_937	9.26	6.41	3.91	3.38		-1.39989	1.32829	0.177284	0.446379		-0.631211	1.63252	0.503	0.831515		-1.4283	1.40067	0.14853	0.312363		0.742157	1.02333	0.465039	0.805668
unitig30_938	9.33	7.02	4.44	7.36		-0.306076	1.44845	0.804303	0.935275		-0.432281	1.44825	0.717697	0.930515		-1.29773	1.17639	0.180372	0.356098		-0.154803	1.27679	0.904233	0.999205
unitig30_939	0.91	0.87	2.22	3.59		1.94004	1.56915	0.0480368	0.213539		-0.273959	0.39065	1	1		1.05003	1.10066	0.324544	0.518709		-2.24687	1.46742	0.0236355	0.186402
unitig30_940	7.88	11.26	13.29	17.29		1.16857	5.61415	0.0858449	0.296132		0.416524	5.2059	0.540827	0.844038		0.554044	5.33776	0.417421	0.609325		-0.780944	5.79857	0.244213	0.637376
unitig30_941	14.26	12.44	5.17	13.61		-0.0293138	4.96749	0.970629	1		-0.292524	4.90794	0.672751	0.910427		-1.65929	4.4812	0.0176894	0.0744121		-0.292054	4.87469	0.668511	0.917267
unitig30_942	22.61	32.01	17.05	18.95		-0.218483	5.2449	0.744859	0.906854		0.404745	5.63425	0.546004	0.846667		-0.605728	5.19306	0.373219	0.567433		0.594443	5.5202	0.377727	0.749003
unitig30_943	6.26	7.61	5.01	3.62		-0.724942	2.62557	0.374441	0.662581		0.193308	3.11037	0.831006	0.97505		-0.496268	2.82482	0.528051	0.700597		0.890021	2.79888	0.249307	0.642064
unitig30_944	10.21	37.63	28.33	26.82		1.4361	4.46878	0.0406494	0.192221		1.79206	4.80292	0.0108612	0.13725		1.28019	4.47911	0.0684029	0.186962		0.327073	5.22709	0.62597	0.892813
unitig30_945	1.17	2.43	2.95	1.08		0.164991	0.291014	1	1		1.13742	0.844999	0.352672	0.73022		1.27278	0.977393	0.283653	0.478484		0.945688	0.791313	0.394643	0.759437
unitig30_946	1.39	11.75	5.86	0.59		-1.2703	0.90357	0.228158	0.510614		2.97451	3.48791	0.000260548	0.0173439		1.872	2.65888	0.0221354	0.0865424		4.22088	3.32243	1.15e-06	7.96e-05
unitig30_947	1.21	1.79	9.3	1.37		0.161023	-0.345433	1	1		0.437772	-0.204245	1	1		2.78636	1.22787	0.023239	0.0895368		0.249841	-0.26637	1	1
unitig30_948	67.65	342.6	339.18	65		-0.0276955	4.06488	0.982	1		2.23711	5.6529	0.00143268	0.0451937		2.11956	5.60983	0.00253528	0.0188844		2.23616	5.6101	0.00138175	0.0274956
unitig30_949	158.64	724.45	871.57	287.76		0.89661	6.88639	0.178211	0.447779		2.09541	7.834	0.00218607	0.0561733		2.25919	8.01941	0.00101896	0.010054		1.16997	8.02514	0.0782712	0.375669
unitig30_950	249.63	1266.92	1381.58	2018.55		3.05209	8.68279	1.65e-05	0.000686772		2.24618	8.05704	0.00107985	0.0393605		2.26856	8.12708	0.000970084	0.00985652		-0.834771	9.22123	0.205173	0.589177
unitig30_951	1.33	0.58	1.57	0		-7.62249	1.20702	9.64e-05	0.00262887		-1.22564	1.7767	0.190995	0.566396		0.0814009	2.36593	1	1		6.63901	0.345807	0.00416566	0.0591496
unitig30_952	46.87	25.25	9.79	22.31		-1.03403	6.86009	0.120806	0.360959		-0.989213	6.94119	0.13757	0.495468		-2.46015	6.64092	0.000424277	0.00556353		0.0159937	6.32594	0.986765	1
unitig30_953	31.94	15.39	14.24	15.62		-0.994199	4.36503	0.156399	0.415704		-1.15413	4.37506	0.0999976	0.423565		-1.36319	4.36007	0.0539143	0.159111		-0.188706	3.77109	0.793482	0.964904
unitig30_954	73.57	51.4	30.21	27.07		-1.4012	4.91995	0.0418108	0.195778		-0.61891	5.24874	0.362059	0.738188		-1.48328	5.01035	0.0314714	0.110882		0.753622	4.55705	0.274242	0.66784
unitig30_955	3.29	22.64	20.23	18.75		2.53945	3.05204	0.00179078	0.024187		2.67272	3.23531	0.00107529	0.0393605		2.40857	3.07545	0.00301933	0.0213112		0.103914	3.86533	0.893912	0.995147
unitig30_956	78.65	77.02	22.55	48.8		-0.646589	4.77425	0.343257	0.631602		-0.121365	5.06993	0.863634	0.989112		-1.99639	4.48598	0.00525183	0.031511		0.496483	4.75123	0.468465	0.807367
unitig30_957	21.87	37.75	59.03	30.69		0.504994	3.29378	0.513635	0.771062		0.666929	3.45756	0.366955	0.742308		1.21338	3.86613	0.0918079	0.227663		0.133114	3.62988	0.875153	0.992639
unitig30_958	113.16	81.47	117.66	61.77		-0.840459	4.91379	0.218796	0.498899		-0.573792	5.0813	0.396301	0.753664		-0.145513	5.32202	0.837294	0.922426		0.23791	4.62706	0.738986	0.942172
unitig30_959	818.42	1469.08	475.18	3226.07		2.01651	11.3142	0.00294655	0.0342597		0.747768	10.4679	0.255409	0.647833		-0.983235	9.68771	0.136503	0.297098		-1.29758	11.5502	0.0507079	0.293151
unitig30_960	92.34	90.47	104.38	107.23		0.253642	6.99782	0.700785	0.887262		-0.125552	6.8704	0.852075	0.983576		-0.0208195	6.97285	0.977477	1		-0.40804	6.99064	0.537659	0.84854
unitig32_1	1.25	3.01	6.03	7.04		2.51363	2.43156	0.00356069	0.0391572		1.16151	1.52772	0.270771	0.665537		2.05574	2.20739	0.0202026	0.0809785		-1.38242	2.63766	0.077138	0.373052
unitig32_2	6.34	4.17	4.66	6.75		0.128244	3.40996	0.8604	0.963834		-0.699933	3.09287	0.337541	0.720236		-0.64208	3.16386	0.402827	0.595397		-0.857223	3.16196	0.248583	0.641808
unitig32_3	54.63	57.39	61.17	46.51		-0.194335	5.26338	0.778884	0.922299		-0.0249398	5.41146	0.978245	1		-0.0356597	5.45714	0.96448	1		0.140585	5.29679	0.839883	0.981123
unitig32_4	73.79	59.5	18.95	41.91		-0.778041	5.75673	0.247655	0.53362		-0.406681	5.97183	0.542991	0.845231		-2.15838	5.49447	0.00208267	0.016591		0.342569	5.56348	0.607555	0.88504
unitig32_5	3.33	13.92	13.37	10.09		1.63208	3.15778	0.0314356	0.16306		1.96237	3.47798	0.0106975	0.135791		1.80109	3.40876	0.0172842	0.0730542		0.30128	3.91959	0.682761	0.923117
unitig32_6	2.95	3.4	4.05	1.05		-1.44996	2.3484	0.0864175	0.2975		0.108626	3.0265	0.891888	0.998589		0.256681	3.15635	0.735	0.858569		1.53117	2.50004	0.0540956	0.303942
unitig32_7	0.57	1.67	3.41	4.15		2.77979	0.364828	0.0577711	0.237282		1.36957	-0.362858	0.658385	0.904744		2.27768	0.159051	0.12496	0.27943		-1.44831	0.454182	0.23879	0.630075
unitig32_8	7.13	11.78	10.62	13.44		0.950718	6.42447	0.153921	0.412371		0.628283	6.28757	0.345722	0.726109		0.376353	6.19108	0.574261	0.739531		-0.35129	6.71584	0.595391	0.877609
unitig32_9	17.71	40.03	27.92	12.68		-0.448563	5.29978	0.510225	0.768427		1.07799	6.21238	0.108164	0.44026		0.456531	5.87267	0.500185	0.681698		1.49781	6.05396	0.0270939	0.204156
unitig32_10	105.33	44.65	25.4	35.98		-1.51236	7.19715	0.0246121	0.140128		-1.33477	7.31181	0.0459085	0.295141		-2.24894	7.15487	0.00110609	0.0107124		0.148776	6.39412	0.824647	0.977287
unitig32_11	33.02	26.45	52.56	10.43		-1.60912	4.27682	0.0221076	0.131799		-0.416423	4.74622	0.546217	0.846667		0.475004	5.25151	0.488558	0.672375		1.16422	4.03856	0.10071	0.424952
unitig32_12	253.81	423.53	334.62	178.6		-0.469908	8.42683	0.474752	0.743313		0.642491	9.0666	0.328571	0.712971		0.19976	8.86451	0.761007	0.875298		1.08357	8.87652	0.101743	0.426546
unitig32_13	43.04	98.05	111.33	65.7		0.647865	7.44757	0.326792	0.615099		1.09153	7.80112	0.100707	0.425703		1.17197	7.90781	0.0783835	0.206072		0.414823	8.01825	0.528233	0.842807
unitig32_14	15.6	32.19	33.41	39.73		1.38599	6.47848	0.0402901	0.191163		0.948412	6.24396	0.157473	0.52805		0.899422	6.26349	0.178976	0.35436		-0.466446	6.85341	0.479245	0.815775
unitig32_15	13.48	14.53	8.23	19.6		0.577348	4.86833	0.403191	0.691756		0.0117038	4.62232	0.987585	1		-0.908882	4.27435	0.194842	0.374702		-0.594539	4.91521	0.383001	0.755264
unitig32_16	5.78	5.77	1.74	5.07		-0.152081	2.37455	0.890635	0.977437		-0.0991219	2.46114	0.947666	1		-1.91934	1.86067	0.0362528	0.121858		0.0242939	2.36222	1	1
unitig32_17	126.01	66.55	29.91	34.57		-1.82782	6.31351	0.00746753	0.066742		-1.01696	6.60231	0.128413	0.479471		-2.27306	6.3413	0.00107783	0.0104986		0.782103	5.64181	0.245076	0.638232
unitig32_18	10.68	10.97	19.44	7.41		-0.488247	2.86593	0.547186	0.791523		-0.0575699	3.12611	0.965974	1		0.6633	3.57811	0.367428	0.562378		0.402152	2.88253	0.603961	0.882568
unitig32_19	1.27	3.41	6.66	5.24		2.04816	1.03472	0.0910982	0.307602		1.30252	0.623372	0.390133	0.752977		2.15757	1.23683	0.0572733	0.165218		-0.777036	1.2833	0.394949	0.759437
unitig32_20	2.99	4.56	5.04	4		0.455186	1.72005	0.672306	0.868911		0.512097	1.81552	0.622031	0.890392		0.552776	1.88874	0.562502	0.729645		0.0280916	1.94718	1	1
unitig32_21	8.2	2.44	4.32	4.21		-0.92108	2.59093	0.225898	0.507686		-1.83548	2.37586	0.0251215	0.213424		-1.11787	2.62385	0.166992	0.337912		-0.943661	1.77915	0.282111	0.676159
unitig32_22	4.71	3.09	5.21	3.08		-0.572302	1.82642	0.562502	0.803508		-0.698789	1.83023	0.438358	0.784147		-0.0536604	2.16323	1	1		-0.155045	1.52492	0.917982	1
unitig32_23	47.2	23.72	11.33	28.44		-0.69286	5.05764	0.31046	0.598335		-1.08814	4.98139	0.111358	0.445747		-2.25454	4.73986	0.00154694	0.0135721		-0.42412	4.54253	0.543186	0.850975
unitig32_24	34.5	157.48	23.52	3.78		-3.16394	4.7428	2.45e-05	0.000937222		2.09239	7.06305	0.00229417	0.0578348		-0.754133	5.38702	0.264839	0.457336		5.22845	6.76172	7.24e-11	1.41e-08
unitig32_25	12.23	11.42	25.06	4.2		-1.49218	3.37992	0.0438272	0.202151		-0.182476	3.92673	0.822917	0.970337		0.848743	4.55616	0.224543	0.409694		1.28152	3.31733	0.0805202	0.379205
unitig32_26	1.11	1.15	2.39	1.4		0.388515	1.68372	0.745262	0.906854		-0.0402993	1.52447	1	1		0.925334	2.11551	0.301975	0.496503		-0.458	1.67324	0.63737	0.89931
unitig32_27	11.4	8.03	11.49	7.37		-0.58537	5.21028	0.389506	0.679586		-0.597245	5.27078	0.375375	0.74319		-0.183295	5.50284	0.788924	0.894578		-0.0406808	4.93435	0.957032	1
unitig32_28	130.35	129.64	186.65	63.03		-0.999794	4.6182	0.151965	0.409193		-0.101075	5.05308	0.889303	0.998589		0.321493	5.32512	0.638767	0.790892		0.870055	4.60398	0.204428	0.588034
unitig32_29	169.12	498.72	625.55	229.35		0.476203	7.08731	0.471287	0.740412		1.46317	7.80592	0.0289842	0.231381		1.68743	8.02513	0.0123295	0.0571986		0.958136	7.92313	0.147751	0.510404
unitig32_30	56.72	88.01	41.22	33.05		-0.74217	7.51066	0.261104	0.549613		0.537263	8.19554	0.414472	0.767399		-0.659269	7.66006	0.31837	0.513598		1.25062	7.91208	0.0603444	0.321949
unitig32_31	155.97	225.45	430.19	266.57		0.811478	6.3141	0.224944	0.507173		0.436033	6.15353	0.513048	0.835519		1.26453	6.73708	0.0595118	0.169258		-0.404301	6.5336	0.542021	0.850975
unitig32_32	20.95	42.72	26.61	20.49		0.00816229	5.05897	1	1		0.936073	5.66496	0.167412	0.539452		0.148382	5.24876	0.829081	0.916711		0.899134	5.63912	0.181576	0.559309
unitig32_33	10.63	41.77	81.16	40.29		1.97408	3.34489	0.00945517	0.0773896		1.8898	3.35229	0.0124574	0.148122		2.75437	4.10289	0.000309569	0.00464957		-0.1134	3.97116	0.88498	0.99423
unitig32_34	12.93	9.78	3.42	22.44		0.820639	3.52129	0.256829	0.544643		-0.505042	2.88413	0.518754	0.835519		-2.07957	2.43542	0.011446	0.0545856		-1.35493	3.38876	0.0643488	0.333426
unitig32_35	3.39	3.04	2.97	2.15		-0.627024	2.3688	0.489124	0.754155		-0.270799	2.58105	0.763086	0.950521		-0.425273	2.5586	0.624149	0.780312		0.327857	2.27007	0.697454	0.92845
unitig32_36	261.87	98.43	32.93	189.07		-0.432357	9.71672	0.509617	0.767785		-1.50813	9.41788	0.0240616	0.209241		-3.18957	9.18397	7.48e-06	0.000361004		-1.10462	9.09796	0.0952877	0.411489
unitig32_37	0	0.26	0.27	0.13		NA	NA	NA	unitig32_37		-0.945957	0.52381	0.835519	unitig32_37		-0.937524	0.52381	0.699292	unitig32_37		-0.918886	1	1
unitig32_38	3.53	1.23	2.98	1.99		-0.73261	1.83164	0.438358	0.718557		-1.52924	1.62359	0.0915827	0.406561		-0.409397	2.06387	0.609666	0.769487		-0.825993	1.19031	0.366588	0.744683
unitig32_39	11.31	7.17	8.6	11.51		0.0682737	5.06268	0.935805	0.998253		-0.748263	4.76358	0.275987	0.671422		-0.585784	4.87779	0.394192	0.588046		-0.845439	4.795	0.217998	0.604504
unitig32_40	27.97	22.49	17.71	30.69		0.174028	4.39429	0.813689	0.941408		-0.398265	4.18163	0.571789	0.862742		-0.860076	4.04449	0.219626	0.403362		-0.601192	4.26615	0.381283	0.753412
unitig32_41	17.1	15.09	6.26	12.78		-0.3817	3.96716	0.593564	0.822449		-0.279742	4.07721	0.685548	0.91703		-1.62694	3.64569	0.0269232	0.0994413		0.0732014	3.866	0.929167	1
unitig32_42	13.01	10.19	13.75	15.55		0.294043	3.37776	0.718229	0.89603		-0.446777	3.07673	0.570106	0.861118		-0.11833	3.27802	0.907115	0.967802		-0.769848	3.2327	0.283729	0.676159
unitig32_43	1.11	0.57	2.2	184.9		7.49839	6.83584	9.22e-16	8.21e-13		-1.09986	0.30538	0.442579	0.787531		0.878333	1.21449	0.465039	0.651484		-8.63408	6.88516	7.06e-18	8.26e-15
unitig32_44	4.61	5.95	3.2	4.18		-0.103463	2.59879	0.951983	1		0.241948	2.83953	0.795875	0.958588		-0.713318	2.4373	0.388873	0.58331		0.316814	2.76138	0.707955	0.932244
unitig32_45	8.75	10.37	6.67	5.99		-0.50466	3.88071	0.471039	0.740412		0.158446	4.2609	0.826502	0.972685		-0.578174	3.96273	0.430538	0.620978		0.634452	4.02281	0.360684	0.741322
unitig32_46	10.19	35.83	69.54	25.32		1.34291	5.2115	0.0510755	0.2226		1.71052	5.55068	0.012952	0.150832		2.56329	6.29104	0.000288297	0.00443101		0.338749	5.96001	0.611131	0.885631
unitig32_47	19.39	39.1	51.64	5.94		-1.65474	3.72146	0.0220782	0.131799		0.911515	4.92782	0.180893	0.55701		1.21214	5.18223	0.0768981	0.203558		2.53811	4.5089	0.00046569	0.0123575
unitig32_48	85.07	91.9	89.89	151.23		0.866224	6.30775	0.196345	0.468161		0.0151428	5.88455	0.989527	1		-0.121121	5.86835	0.856112	0.933221		-0.879955	6.36091	0.187083	0.565181
unitig32_49	6.59	37.75	54.29	24.66		1.93595	4.4805	0.00682524	0.0627255		2.41678	4.93746	0.000842713	0.034923		2.84029	5.34889	9.78e-05	0.00227288		0.451896	5.42383	0.504918	0.833695
unitig32_50	7.44	12.22	7.55	2.72		-1.43305	3.29744	0.053577	0.228829		0.614378	4.25959	0.373903	0.742308		-0.182459	3.87802	0.814693	0.909694		2.01937	3.82278	0.005749	0.07544
unitig32_51	3.41	5.29	5.39	2.14		-0.642732	2.57927	0.429983	0.714331		0.537973	3.22622	0.469114	0.810278		0.467929	3.23624	0.54347	0.714456		1.15253	2.96909	0.131497	0.48111
unitig32_52	126.16	134.05	45.06	159.81		0.379366	7.93425	0.564569	0.805424		-0.0085775	7.79453	0.990925	1		-1.68276	7.23867	0.0128553	0.0589217		-0.416788	7.97973	0.526308	0.842725
unitig32_53	2.73	3.92	5.33	4.04		0.638493	1.82355	0.488687	0.754155		0.453558	1.78243	0.686852	0.917366		0.796633	2.03493	0.372408	0.566905		-0.213986	2.00614	0.87929	0.993094
unitig32_54	1.67	2.52	6.09	3.53		1.16413	2.61024	0.155007	0.413299		0.536636	2.28564	0.55548	0.852421		1.70276	3.1147	0.0262996	0.0976156		-0.656754	2.79468	0.384798	0.756302
unitig32_55	1.31	1.68	2.75	0.58		-1.16993	1.47197	0.270771	0.560425		0.274785	2.13822	0.809946	0.965902		0.880302	2.54668	0.271034	0.464349		1.41814	1.71799	0.128892	0.478077
unitig32_56	32.33	51.84	83.2	32.8		0.0577178	5.95567	0.935354	0.998253		0.584857	6.31565	0.382494	0.750876		1.16417	6.74163	0.0827007	0.213392		0.498323	6.31497	0.453753	0.798518
unitig32_57	72.49	72.58	56.68	140.64		0.993907	8.15334	0.133497	0.381066		-0.0936097	7.59306	0.888145	0.998589		-0.554034	7.43918	0.401179	0.59408		-1.11637	8.17463	0.0924088	0.404832
unitig32_58	131.64	49.48	22.06	42.08		-1.60865	6.02087	0.0183328	0.118064		-1.50681	6.11217	0.0264921	0.22022		-2.77103	5.92032	0.000103038	0.00232493		0.0730551	5.11255	0.923978	1
unitig32_59	11.6	14.52	14.05	17.23		0.612512	4.70163	0.380103	0.668561		0.236664	4.55274	0.743962	0.941113		0.0791225	4.51983	0.919061	0.975079		-0.40473	4.83951	0.555593	0.857807
unitig32_60	20.02	10.41	8.09	6.83		-1.48646	2.45106	0.0577162	0.237282		-1.03214	2.64496	0.178922	0.55427		-1.46238	2.55311	0.0682262	0.186599		0.426356	1.88409	0.623263	0.891454
unitig32_61	4.52	4.95	3.49	9.52		1.11164	3.20302	0.131497	0.376757		0.0238054	2.62702	1	1		-0.558407	2.40347	0.489124	0.672674		-1.1171	3.22723	0.131422	0.48111
unitig32_62	13.24	6.42	6.94	5.04		-1.3544	3.78747	0.0585038	0.238731		-1.1263	3.91831	0.113676	0.449045		-1.13048	3.96529	0.113936	0.262708		0.19952	3.15391	0.802348	0.968875
unitig32_63	12.29	9.9	6.14	4.67		-1.23278	1.37581	0.241983	0.526361		-0.370532	1.74167	0.7571	0.949308		-1.14313	1.48846	0.232646	0.418451		0.835508	1.22105	0.454082	0.798518
unitig32_64	21.91	6.79	4.91	7.18		-1.56953	4.74874	0.0244979	0.139858		-1.78099	4.75958	0.0107889	0.136542		-2.34247	4.69511	0.00107484	0.0104936		-0.240224	3.73154	0.751746	0.948719
unitig32_65	5.06	5.75	5.25	11.41		1.21657	4.07251	0.0903278	0.306197		0.100504	3.46048	0.918577	1		-0.131961	3.39272	0.885401	0.952904		-1.14515	4.13302	0.102399	0.428236
unitig32_66	9.91	3.71	10.75	4.39		-1.13731	2.72518	0.141868	0.396003		-1.5037	2.6698	0.0540956	0.320978		-0.0622109	3.27387	0.968981	1		-0.395123	1.98119	0.698707	0.92845
unitig32_67	98.9	114.49	221.12	123.98		0.362488	7.25614	0.582485	0.815247		0.114326	7.18853	0.864008	0.989112		0.961137	7.74115	0.147174	0.311688		-0.277006	7.35529	0.674698	0.918754
unitig32_68	6.32	11.13	16.83	3		-1.02923	1.72706	0.248713	0.534944		0.717017	2.61077	0.361157	0.737707		1.2104	2.98331	0.114505	0.263625		1.71923	2.27388	0.0365185	0.243153
unitig32_69	9.93	12.49	14.14	13.41		0.470647	3.34493	0.52802	0.77802		0.242882	3.28304	0.757515	0.949308		0.311934	3.37188	0.688906	0.826872		-0.256663	3.48014	0.728099	0.937567
unitig32_70	0.84	0.65	1.16	2.08		1.27336	1.69867	0.147866	0.403224		-0.534887	0.814021	0.725047	0.931553		0.191766	1.18189	1	1		-1.8396	1.54295	0.0380057	0.249664
unitig32_71	4.03	2.67	4.96	4.78		0.283775	2.9322	0.735006	0.901432		-0.682388	2.53834	0.416821	0.769221		0.0868074	2.9415	0.961491	1		-0.995379	2.70163	0.182184	0.560802
unitig32_72	12.87	8.14	7.37	23.44		0.902502	6.25578	0.17736	0.446437		-0.758662	5.4684	0.264654	0.658442		-1.00027	5.43232	0.140563	0.303442		-1.69009	6.08476	0.0130056	0.127161
unitig32_73	71.03	63.16	83.01	95.81		0.465546	5.76602	0.492084	0.756742		-0.265966	5.45272	0.697487	0.922161		0.0226545	5.64308	0.981254	1		-0.760389	5.70781	0.256853	0.648938
unitig32_74	16.72	26.83	10.42	7.73		-1.0725	5.38454	0.112504	0.34731		0.586556	6.21636	0.377376	0.746452		-0.882257	5.5649	0.19171	0.369988		1.63035	5.85081	0.016948	0.152029
unitig32_75	30.92	41.42	29.94	29.33		-0.0214578	2.89623	1	1		0.326721	3.14467	0.67196	0.910268		-0.250031	2.89718	0.764237	0.877017		0.319518	3.10191	0.683945	0.92351
unitig32_76	36.49	44.65	65.79	97.12		1.44154	4.86015	0.0381236	0.184673		0.193574	4.13649	0.795594	0.958588		0.648974	4.4498	0.350587	0.546058		-1.27697	4.95224	0.0615529	0.3256
unitig32_77	0.4	0.89	2.3	1.53		1.96995	2.01449	0.0269514	0.149119		1.03115	1.44537	0.315121	0.702968		2.31797	2.40837	0.00823406	0.0434709		-0.968899	2.24399	0.235741	0.628128
unitig32_78	6.22	3.45	7.16	1.12		-2.38286	1.40007	0.0155141	0.107267		-0.951315	1.8038	0.2718	0.66571		0.0188037	2.26825	1	1		1.40768	0.849239	0.183672	0.56188
unitig32_79	26.67	5.65	13.04	3.05		-3.08256	4.54148	3.77e-05	0.00129134		-2.33003	4.70663	0.00109598	0.0395957		-1.22957	5.01483	0.0724463	0.195557		0.724357	2.8322	0.345784	0.727347
unitig32_80	34.18	71.89	56.74	34.01		0.0321146	6.41734	0.963792	1		0.977192	7.03816	0.142847	0.505962		0.53291	6.81072	0.421621	0.612925		0.916262	7.02346	0.167099	0.539315
unitig32_81	548.32	660.45	304.34	871.75		0.706773	8.99349	0.282905	0.571525		0.172323	8.75284	0.793166	0.958588		-1.04827	8.28362	0.113665	0.262331		-0.563293	9.11155	0.391026	0.758345
unitig32_82	40.32	33.73	25.99	37.15		-0.0859609	5.19531	0.907871	0.985539		-0.35818	5.13447	0.597434	0.875876		-0.833842	4.99212	0.224147	0.409137		-0.301062	5.07045	0.657851	0.90951
unitig32_83	230.27	397.77	868.39	275.15		0.294521	7.98985	0.654693	0.863427		0.692432	8.28943	0.293514	0.681642		1.71595	9.05255	0.0107775	0.052399		0.369074	8.38754	0.574201	0.869663
unitig32_84	25.98	32.35	22.93	47.87		0.921116	5.04492	0.176385	0.446012		0.222198	4.69448	0.755196	0.948651		-0.371983	4.45185	0.595973	0.757375		-0.727827	5.16635	0.282765	0.676159
unitig32_85	0.68	0.8	0.41	2.83		2.33094	0.774264	0.0536329	0.228829		0.437772	-0.204245	1	1		-0.577823	-0.506751	1	1		-1.92892	0.748422	0.0910982	0.401999
unitig32_86	1.26	0.44	0.64	4.91		1.96995	2.01449	0.0269514	0.149119		-1.71677	0.315495	0.191276	0.566396		-1.07605	0.512684	0.497906	0.679902		-3.72327	1.7682	0.000343491	0.00980395
unitig32_87	0.63	1.37	1.4	3.63		2.52176	0.907109	0.06403	0.251334		1.00544	0.0505251	0.769726	0.950521		0.937912	0.0592837	0.769726	0.879154		-1.5505	0.988844	0.14853	0.510404
unitig32_88	0.64	1.23	1.6	8.09		3.64409	1.77206	0.00141891	0.0202147		0.749351	-0.0709553	0.726708	0.931553		1.15523	0.170477	0.585507	0.748745		-2.93088	1.76448	0.00248498	0.0413043
unitig32_89	1.38	6.56	5.99	5.66		2.07518	5.73883	0.00292892	0.0342283		2.15278	5.86976	0.00204283	0.0548919		1.92112	5.73713	0.0055791	0.0329618		0.0487024	6.5063	0.944521	1
unitig32_90	21.3	19.37	11.5	18.61		-0.149879	4.13848	0.846747	0.956863		-0.224186	4.16819	0.76684	0.950521		-1.0873	3.87156	0.121821	0.274728		-0.103116	4.07189	0.892015	0.994985
unitig32_91	33.76	31.4	28.04	84.64		1.36303	8.10892	0.041168	0.193943		-0.201075	7.24175	0.762772	0.950521		-0.468	7.17447	0.478707	0.662429		-1.59297	8.10881	0.0176337	0.1562
unitig32_92	2.65	3.74	6.2	4.92		0.939089	3.6666	0.202677	0.476075		0.420325	3.41671	0.596596	0.875629		1.03852	3.85291	0.146714	0.311135		-0.54775	3.84931	0.441871	0.790687
unitig32_93	3.39	5.18	7.37	4.39		0.4093	3.44215	0.581255	0.814223		0.519975	3.57287	0.480626	0.816863		0.925663	3.87672	0.199355	0.380159		0.0818557	3.71634	0.921253	1
unitig32_94	10.58	11.51	13.73	6.48		-0.676909	3.04194	0.394662	0.682241		0.021593	3.41966	1	1		0.176363	3.5512	0.819591	0.91288		0.670052	3.108	0.366382	0.744683
unitig32_95	2.02	6.3	5.58	0.66		-1.52664	0.836593	0.146765	0.402649		1.57355	2.38628	0.0681747	0.359096		1.31179	2.257	0.130209	0.288356		3.07709	2.07564	0.00065691	0.0160018
unitig32_96	23.6	14.57	15.03	18.89		-0.289647	3.39573	0.722591	0.896403		-0.798968	3.24519	0.286667	0.675351		-0.8381	3.27801	0.259979	0.451701		-0.538226	3.06678	0.492683	0.826206
unitig32_97	1.15	0.76	1.27	0.26		-2.23712	0.69178	0.0536329	0.228829		-0.672701	1.14303	0.545915	0.846667		-0.0721391	1.44497	1	1		1.5439	0.353997	0.189984	0.56649
unitig32_98	1.33	0.91	1.08	4.23		1.71418	3.40961	0.0231791	0.135814		-0.603955	2.1221	0.467814	0.810264		-0.490565	2.21546	0.587167	0.749891		-2.34804	3.30365	0.0023004	0.039001
unitig32_99	7.21	6.13	6.43	5.02		-0.480035	3.03249	0.528097	0.77802		-0.33371	3.15831	0.67782	0.912176		-0.349469	3.19994	0.656635	0.803584		0.117681	2.90233	0.89815	0.997488
unitig32_100	198.17	162.41	202	372.59		0.950038	5.70931	0.159677	0.421238		-0.377608	5.04547	0.583303	0.867895		-0.171379	5.19068	0.805971	0.905557		-1.35657	5.63852	0.0457066	0.276079
unitig32_101	10.03	7.87	10.45	10.03		0.0457376	4.68268	0.964276	1		-0.440031	4.51938	0.524074	0.835519		-0.134604	4.70965	0.847063	0.928246		-0.514643	4.53041	0.456808	0.800736
unitig32_102	11.35	20.55	11.96	228.37		4.36799	7.80968	8.42e-09	9.61e-07		0.75805	4.88698	0.270449	0.665537		-0.121712	4.44709	0.873533	0.946253		-3.63894	7.91115	6.09e-07	4.57e-05
unitig32_103	47.98	21.14	8.7	22.24		-1.08066	3.92995	0.126615	0.371066		-1.27802	3.92874	0.0713992	0.365048		-2.66463	3.67125	0.000499734	0.0062441		-0.226113	3.26835	0.789754	0.962926
unitig32_104	50.65	27.17	19	22.67		-1.1211	4.80274	0.100519	0.32426		-0.994059	4.90867	0.145292	0.510092		-1.6118	4.77449	0.021356	0.0843108		0.0982908	4.26158	0.891386	0.994985
unitig32_105	32.39	20.26	18.68	15.94		-0.984067	3.88952	0.161605	0.422763		-0.772058	4.0284	0.279603	0.674324		-0.991918	3.9972	0.164742	0.335093		0.183348	3.49053	0.819207	0.974792
unitig32_106	25.6	21.19	19.48	20.03		-0.315997	4.70525	0.649247	0.858924		-0.368343	4.74708	0.596589	0.875629		-0.592391	4.70203	0.393556	0.587736		-0.0811556	4.56247	0.922505	1
unitig32_107	150.54	148.51	52.94	138.28		-0.084869	8.31044	0.897883	0.981024		-0.11574	8.36233	0.860682	0.987676		-1.7064	7.85428	0.0114046	0.0544799		-0.0597099	8.30016	0.928189	1
unitig32_108	14.52	6.58	10.89	15.23		0.106418	3.58868	0.925473	0.993174		-1.23343	3.09461	0.102354	0.42858		-0.612002	3.36718	0.399195	0.592093		-1.36908	3.17086	0.0640868	0.332272
unitig32_109	81.77	34.57	65.86	41.84		-0.928423	4.79618	0.176135	0.445874		-1.33706	4.72903	0.053401	0.319499		-0.51078	5.07144	0.448855	0.636378		-0.437467	4.13053	0.537955	0.84854
unitig32_110	4.36	2.64	4.96	1.1		-1.93671	1.97386	0.0232942	0.136111		-0.812333	2.35336	0.329842	0.713897		-0.0118809	2.75548	1	1		1.09779	1.5109	0.248713	0.641808
unitig32_111	57.24	158.59	447.77	46.47		-0.26314	6.50678	0.694034	0.883309		1.37385	7.54416	0.0402954	0.271467		2.76844	8.71521	7.67e-05	0.00194303		1.60819	7.44761	0.0169076	0.151829
unitig32_112	50.33	125.83	313.77	22.26		-1.13667	3.42671	0.11907	0.35827		1.22479	4.69739	0.0776128	0.383443		2.43981	5.6856	0.000560789	0.00670103		2.33324	4.40592	0.00136337	0.0271936
unitig32_113	147.81	263.11	32.15	38.98		-1.88499	7.51011	0.00555832	0.0537092		0.735771	8.64708	0.264156	0.658119		-2.39938	7.53137	0.000530764	0.00647585		2.59198	8.15693	0.000192899	0.00617057
unitig32_114	220.13	341.98	101.49	116.1		-0.885178	7.54876	0.181773	0.451364		0.539412	8.28687	0.412475	0.766387		-1.31576	7.52866	0.0490178	0.150147		1.39578	7.96293	0.0366795	0.243677
unitig32_115	3.12	16.02	16.39	0.76		-1.85869	-0.503023	0.658385	0.863447		2.22624	1.23196	0.0456519	0.29438		2.15757	1.23683	0.0572733	0.165218		4.08393	0.953366	0.00174368	0.0317959
unitig32_116	50.45	109.37	74.99	9.73		-2.33563	5.71148	0.00085078	0.0139136		1.02013	7.1215	0.12569	0.473732		0.373005	6.7729	0.57503	0.740297		3.3272	6.64723	4.35e-06	0.000261349
unitig32_117	6.28	16.98	6.28	2.25		-1.43918	2.87162	0.0554865	0.234218		1.33728	4.31092	0.0592139	0.335063		-0.197924	3.44559	0.808448	0.906929		2.74875	3.99009	0.000296373	0.00869328
unitig32_118	41.91	30.16	15.65	45.26		0.148429	5.51777	0.832986	0.951486		-0.570421	5.24808	0.39599	0.753648		-1.61883	4.95442	0.0192875	0.0785641		-0.747727	5.3242	0.268236	0.662155
unitig32_119	1.61	2.95	1.81	1.17		-0.40945	0.815714	0.854437	0.960996		0.771204	1.45292	0.454082	0.799195		-0.0280596	1.0738	1	1		1.15405	1.26378	0.270771	0.665505
unitig32_120	11.25	6.6	5.91	8.21		-0.414516	2.89745	0.624339	0.841919		-0.862071	2.77691	0.258293	0.65231		-1.12374	2.73019	0.141868	0.305267		-0.476442	2.53108	0.548796	0.852892
unitig32_121	314.86	326.37	74.72	205.89		-0.574524	7.50843	0.384338	0.673768		-0.0442318	7.81244	0.947576	1		-2.27289	7.15341	0.000992082	0.00993721		0.501466	7.52823	0.446855	0.793745
unitig32_122	446.52	861.81	81.76	551.22		0.341486	6.91679	0.60754	0.830517		0.852213	7.29112	0.198594	0.575562		-2.64561	6.05917	0.00018452	0.00341841		0.481895	7.3989	0.465028	0.805668
unitig32_123	16.68	54.02	63.14	28.51		0.81067	5.26534	0.23153	0.515897		1.59848	5.87944	0.019221	0.186383		1.72059	6.02364	0.0122962	0.0571255		0.758984	6.09536	0.255873	0.647897
unitig32_124	9.61	9.87	3.53	2.18		-2.08908	2.54269	0.0106432	0.0832458		-0.0575865	3.28974	0.969519	1		-1.63908	2.74036	0.0333343	0.115485		2.00462	2.58594	0.0127006	0.124899
unitig32_125	5.58	6.28	13.6	9.02		0.728851	3.00727	0.325362	0.6135		0.0754964	2.70314	0.955638	1		1.08438	3.35655	0.145885	0.309964		-0.68245	3.05626	0.374611	0.7459
unitig32_126	178.81	52.85	64.87	48.31		-1.84887	5.1581	0.00784354	0.0689394		-1.85314	5.22061	0.00781982	0.115021		-1.66061	5.31541	0.0158195	0.0681282		-0.0329961	4.02408	0.968086	1
unitig32_127	6.67	5.62	13.94	3.63		-0.838515	2.95136	0.269623	0.559564		-0.342012	3.21516	0.662457	0.907038		0.864096	3.92882	0.223273	0.407715		0.468071	2.80596	0.554174	0.857094
unitig32_128	27.93	90.27	152.63	19.45		-0.484566	7.27047	0.463191	0.734625		1.59574	8.56771	0.0174283	0.177864		2.2508	9.13655	0.00101683	0.010054		2.05149	8.43295	0.00259192	0.0425809
unitig32_129	3.94	6.69	7.12	3.76		-0.0332689	3.5429	0.974404	1		0.659764	3.99381	0.358416	0.735524		0.65516	4.04262	0.36893	0.563457		0.664357	3.94727	0.346445	0.728376
unitig32_130	12.08	44.61	92.25	33.24		1.4931	4.20891	0.0350269	0.17521		1.78278	4.49445	0.0123616	0.148024		2.7308	5.31747	0.000177763	0.00338336		0.260774	4.94125	0.706927	0.931833
unitig32_131	437.22	296.3	195.4	143.04		-1.57454	8.37702	0.0189036	0.120809		-0.657701	8.73485	0.317549	0.70569		-1.36075	8.55175	0.0412722	0.133048		0.888019	7.96015	0.179174	0.556972
unitig32_132	5.59	4.57	2.41	4.23		-0.373939	4.24278	0.601711	0.82629		-0.383722	4.30294	0.587425	0.867895		-1.41492	3.97857	0.0457491	0.143223		-0.0385702	4.0898	0.969469	1
unitig32_133	14.75	9.28	3.62	5.8		-1.32532	2.84856	0.083165	0.290885		-0.763448	3.09689	0.320336	0.708608		-2.21742	2.72771	0.00679774	0.0374494		0.533667	2.43647	0.484925	0.82001
unitig32_134	2.38	1.09	1.27	1.13		-1.02923	1.72706	0.248713	0.534944		-1.26972	1.69868	0.169557	0.542034		-1.11956	1.78783	0.21793	0.401676		-0.268969	1.13579	0.792443	0.963917
unitig32_135	6.49	16.63	30.11	13.56		1.09573	5.30834	0.106774	0.337263		1.25334	5.48494	0.0664956	0.356019		2.00768	6.10305	0.00362655	0.0243794		0.128752	5.87177	0.847058	0.983362
unitig32_136	5.14	16.81	20.89	0		-7.98343	1.53094	1.8e-05	0.000727611		1.59315	3.61151	0.0316346	0.245132		1.80788	3.82541	0.0145088	0.0641765		9.82044	3.16316	5.92e-10	8.57e-08
unitig32_137	11.84	12.4	9.01	7		-0.717468	4.20758	0.309463	0.596968		-0.0246563	4.5786	0.987225	1		-0.586964	4.37276	0.398969	0.592068		0.664147	4.24326	0.3366	0.720757
unitig32_138	16.91	27.15	28.7	8.14		-1.02082	4.39832	0.144677	0.399883		0.587282	5.21551	0.389506	0.752977		0.564383	5.25326	0.408103	0.600267		1.57952	4.86282	0.0226332	0.181659
unitig32_139	9.8	25.54	44.84	15.57		0.706291	5.57018	0.29382	0.581637		1.28592	6.02252	0.0576691	0.331566		1.9955	6.60873	0.00369075	0.0245779		0.550798	6.23698	0.407693	0.768345
unitig32_140	6.59	7.78	10.27	4.56		-0.489024	3.83525	0.507914	0.765975		0.134762	4.19629	0.868065	0.990286		0.439271	4.41603	0.534239	0.70711		0.595131	3.96263	0.397592	0.761408
unitig32_141	4.22	2.1	1.49	15.75		1.93057	1.98555	0.0312329	0.162208		-1.00724	0.499152	0.497906	0.828765		-1.78506	0.329982	0.191276	0.369596		-2.97139	1.79752	0.00212562	0.0366237
unitig32_142	57.84	37.97	13.38	61.57		0.125642	5.36337	0.858803	0.963532		-0.702241	5.05294	0.30088	0.688484		-2.30521	4.66425	0.0013084	0.0120135		-0.856774	5.11922	0.207535	0.592118
unitig32_143	6.88	5.36	2.42	1.29		-2.36077	3.45203	0.00226773	0.0282325		-0.448423	4.06714	0.540457	0.843758		-1.69321	3.69451	0.0211528	0.0837818		1.88471	3.17404	0.0118698	0.119644
unitig32_144	23.91	69.87	92.3	33.19		0.508651	5.00494	0.46082	0.733063		1.45048	5.69428	0.0337342	0.253681		1.74998	5.97018	0.0109255	0.0529042		0.913028	5.81693	0.174906	0.550567
unitig32_145	14.4	13.36	7.77	11.39		-0.300844	4.76211	0.671195	0.86866		-0.207199	4.8707	0.772768	0.950805		-1.09173	4.56833	0.116334	0.266391		0.0648479	4.69986	0.939446	1
unitig32_146	37.26	33.01	18.22	67.24		0.892092	5.81298	0.185208	0.455128		-0.268669	5.23607	0.696341	0.921794		-1.22402	4.92184	0.0757302	0.201463		-1.18967	5.77178	0.0782784	0.375669
unitig32_147	7.96	12.02	11.95	17.1		1.13565	2.59129	0.16852	0.434005		0.496163	2.26217	0.600141	0.877605		0.384666	2.24865	0.647858	0.797624		-0.668743	2.76274	0.374665	0.7459
unitig32_148	4.88	18.62	53.47	12.48		1.38206	2.05695	0.129437	0.376207		1.82487	2.44369	0.0280835	0.226401		3.24183	3.64278	7.53e-05	0.00192744		0.413759	2.7756	0.609731	0.88554
unitig32_149	6.75	7.93	7.09	13.81		1.06559	2.76374	0.164267	0.42753		0.134274	2.27932	0.883327	0.99642		-0.127288	2.19528	0.938413	0.986799		-0.960653	2.8157	0.199722	0.58067
unitig32_150	0	0.28	1.16	0		NA	NA	NA	NA		NA	NA	unitig32_150	4.77919		0.285714	0.47943	NA	NA		NA
unitig32_151	17.73	24.1	11.56	10.4		-0.73016	3.35627	0.320611	0.609494		0.345783	3.92933	0.635842	0.898309		-0.814415	3.43293	0.275996	0.469814		1.04749	3.62913	0.146409	0.509069
unitig32_152	170.17	146.96	130.38	75.37		-1.13691	6.51639	0.0899944	0.305338		-0.307686	6.89773	0.644164	0.901724		-0.583079	6.83165	0.381013	0.57559		0.800436	6.35962	0.229704	0.622108
unitig32_153	122.95	121.82	93.49	57.74		-1.05251	7.40449	0.113186	0.34839		-0.109507	7.85059	0.868698	0.990286		-0.59408	7.68836	0.367889	0.562748		0.91419	7.37666	0.167514	0.539315
unitig32_154	63.32	120.03	202.17	151.77		1.2981	5.73366	0.0552718	0.233778		0.825971	5.48319	0.222198	0.607328		1.47519	5.98087	0.0304482	0.108402		-0.501015	6.06607	0.453883	0.798518
unitig32_155	70.6	70.95	24.67	52.97		-0.376178	3.75465	0.615257	0.835663		-0.0889866	3.9528	0.922123	1		-1.71128	3.40674	0.0206257	0.0821541		0.258481	3.75341	0.717973	0.934048
unitig32_156	4.01	7.6	6.02	6.84		0.801113	1.91974	0.392904	0.681735		0.82079	1.99858	0.372408	0.742308		0.383855	1.79264	0.7571	0.873553		-0.00930265	2.25257	1	1
unitig32_157	5.65	4.91	2.28	2.03		-1.43412	3.21301	0.0507317	0.221558		-0.298209	3.68972	0.704519	0.923984		-1.50243	3.29692	0.043614	0.138751		1.10775	3.07528	0.138676	0.497906
unitig32_158	8.41	12.69	8.86	8.09		-0.0181917	4.42358	1	1		0.49747	4.77022	0.477412	0.815755		-0.123864	4.48765	0.863404	0.938757		0.486895	4.7353	0.478936	0.815775
unitig32_159	1.68	1.43	2.57	1.76		0.0859528	1.52781	1	1		-0.317737	1.39654	0.898528	0.999413		0.383855	1.79264	0.7571	0.873553		-0.432777	1.4093	0.656347	0.90951
unitig32_160	1.26	1.2	0.35	0.68		-0.816073	0.670141	0.542974	0.788185		-0.0826326	1.00447	1	1		-1.97519	0.435699	0.0999758	0.240362		0.707309	0.662246	0.580436	0.873296
unitig32_161	0.87	1.77	1.83	1.73		1.0616	1.84619	0.2718	0.560425		0.935295	1.83449	0.307713	0.695087		0.915995	1.87384	0.330406	0.525852		-0.15549	2.18441	0.893954	0.995147
unitig32_162	49.19	58.46	35.45	45.17		-0.0851291	6.04043	0.901553	0.982931		0.153882	6.2283	0.819239	0.969874		-0.671099	5.90081	0.316146	0.511163		0.210188	6.16758	0.752838	0.949251
unitig32_163	31.49	22.7	22.4	18.79		-0.705782	6.2854	0.289856	0.577653		-0.567658	6.40589	0.392203	0.752977		-0.688476	6.40902	0.300593	0.495581		0.109308	6.01044	0.868958	0.99074
unitig32_164	0.88	1.42	1.97	1.92		1.16064	1.90979	0.21203	0.488701		0.589443	1.62683	0.567307	0.859366		0.964655	1.90456	0.330406	0.525852		-0.600703	2.0913	0.474911	0.812312
unitig32_165	30.15	13.06	8.94	9.53		-1.62229	5.30316	0.0186574	0.119416		-1.30102	5.45453	0.0556904	0.32639		-1.95135	5.34103	0.00523788	0.0314718		0.292553	4.50671	0.67468	0.918754
unitig32_166	152.15	164.13	80.77	269.34		0.862049	8.43168	0.191795	0.461739		0.0134387	8.0107	0.984892	1		-1.11173	7.60256	0.094523	0.231038		-0.877459	8.48766	0.183736	0.56188
unitig32_167	80.75	68.91	75.13	49.21		-0.678631	6.22719	0.309853	0.597585		-0.326177	6.44003	0.624291	0.890729		-0.302958	6.50154	0.650648	0.799319		0.323645	6.08385	0.629912	0.895333
unitig32_168	12.17	12.52	12.46	7.47		-0.672417	4.13245	0.336873	0.625167		-0.0537078	4.47153	0.945153	1		-0.1639	4.4683	0.820918	0.913743		0.59004	4.15075	0.40299	0.765615
unitig32_169	2.36	4.33	5.48	2.55		0.168386	2.36188	0.833964	0.95196		0.801935	2.79204	0.307913	0.695087		1.03241	2.99271	0.192231	0.370824		0.605008	2.8036	0.437711	0.787548
unitig32_170	4.46	2.05	1.69	0.36		-3.78268	1.36527	0.000488131	0.00907065		-1.18668	1.85071	0.167446	0.539452		-1.60015	1.76926	0.0817032	0.211849		2.58182	0.58261	0.0396963	0.255935
unitig32_171	4.4	11.04	11.64	16.06		1.88096	3.03995	0.0169988	0.112903		1.20655	2.62755	0.142605	0.505696		1.18899	2.6686	0.131224	0.28858		-0.703719	3.38736	0.334789	0.71991
unitig32_172	2.04	2.71	4.02	3.24		0.748917	1.88842	0.438358	0.718557		0.328832	1.71367	0.832809	0.97505		0.840822	2.06233	0.335401	0.530252		-0.449329	2.0095	0.647858	0.904611
unitig32_173	7.15	2.74	2.92	3.38		-1.06024	1.84207	0.240055	0.525004		-1.53049	1.74886	0.0946183	0.41237		-1.47625	1.80368	0.0817032	0.211849		-0.499062	1.13806	0.597593	0.87902
unitig32_174	3.99	7.19	1.85	8.88		1.1783	3.89243	0.100822	0.324868		0.729674	3.66792	0.317431	0.70569		-1.33414	2.76356	0.0883561	0.221714		-0.477597	4.18081	0.490329	0.824892
unitig32_175	3.6	7.62	6.83	6.34		0.90016	1.98029	0.315146	0.602161		1.03556	2.13412	0.244669	0.639097		0.751048	2.00694	0.413309	0.606138		0.106447	2.4027	0.953267	1
unitig32_176	115.83	45.85	30.33	61.68		-0.870696	6.07372	0.192544	0.463147		-1.42839	5.96388	0.034847	0.256289		-2.1341	5.85156	0.00211323	0.0167401		-0.586542	5.37718	0.385431	0.75667
unitig32_177	109.09	86.61	230.76	62.48		-0.767924	6.60726	0.2487	0.534944		-0.429805	6.80866	0.518394	0.835519		0.881361	7.56719	0.183405	0.360104		0.309304	6.4003	0.641054	0.900898
unitig32_178	147.2	113.23	220.84	153.77		0.101696	6.69923	0.881051	0.974676		-0.473905	6.49554	0.476901	0.815755		0.386559	6.97207	0.559424	0.727826		-0.604453	6.5399	0.362363	0.741754
unitig32_179	14.03	8.69	21.12	9.01		-0.60767	4.15813	0.392996	0.681735		-0.783136	4.15305	0.270838	0.665537		0.386306	4.75726	0.582946	0.747087		-0.204261	3.79529	0.778646	0.957459
unitig32_180	77.97	59.33	20.81	69.96		-0.11785	7.5392	0.859145	0.963739		-0.489201	7.43927	0.457802	0.801692		-2.10197	7.0134	0.00219791	0.0171546		-0.400193	7.35518	0.544015	0.850975
unitig32_181	7.97	7.25	10.27	7.78		0.00688033	4.29279	1	1		-0.227104	4.24434	0.762815	0.950521		0.171719	4.49518	0.809595	0.906929		-0.262828	4.22954	0.714323	0.93403
unitig32_182	632.15	962.9	1252.35	889.84		0.53081	10.3171	0.418312	0.706074		0.510906	10.3723	0.435878	0.783314		0.787317	10.5925	0.231368	0.417277		-0.0487443	10.5963	0.940724	1
unitig32_183	2.34	0.73	0.88	0.72		-1.64412	1.89566	0.0529857	0.228336		-1.77047	1.90994	0.0459806	0.295156		-1.60216	1.99298	0.0565605	0.164268		-0.15443	0.976997	0.884696	0.99423
unitig32_184	2.89	1.41	0.71	0.58		-2.28567	1.75959	0.0142253	0.100649		-1.06746	2.11381	0.220226	0.605324		-2.12533	1.86849	0.0171989	0.0728484		1.19274	1.12222	0.21179	0.598728
unitig32_185	1.69	1.58	0.7	0.67		-1.19443	0.410051	0.333681	0.622464		-0.177823	0.80495	1	1		-1.38743	0.424452	0.333681	0.529446		0.992681	0.356731	0.390133	0.758345
unitig32_186	13.9	19.2	27.26	5.01		-1.43583	4.21831	0.0423613	0.197445		0.372209	5.03699	0.586426	0.867895		0.776413	5.33071	0.255242	0.44603		1.77959	4.55118	0.0116744	0.117949
unitig32_187	1.07	3	1.15	1.01		-0.149393	0.394904	1	1		1.365	1.24788	0.180372	0.55591		-0.125355	0.490736	1	1		1.4886	1.11995	0.122481	0.46892
unitig32_188	31.2	22.46	10.64	30.18		-0.0176245	4.73012	0.988478	1		-0.576534	4.54155	0.399537	0.754959		-1.76397	4.20999	0.0127845	0.0587244		-0.58779	4.51772	0.392859	0.759437
unitig32_189	3.04	2.9	5.7	1.45		-0.993455	1.80296	0.2718	0.560425		-0.179649	2.18776	0.87496	0.992741		0.719567	2.72962	0.362123	0.557679		0.786239	1.75709	0.372408	0.7459
unitig32_190	1.24	5.17	4.2	2.26		0.929701	1.62994	0.369464	0.658201		1.97526	2.4178	0.0201887	0.188906		1.59845	2.19623	0.0797222	0.208112		1.01695	2.56251	0.18837	0.56649
unitig32_191	14.6	15.41	7.22	8.47		-0.735674	3.07603	0.310597	0.598335		-0.0170425	3.45704	1	1		-1.20909	3.01432	0.107623	0.252718		0.690193	3.1201	0.350467	0.731931
unitig32_192	17.48	22.34	7.68	16.5		-0.044214	5.02395	0.952898	1		0.258896	5.24821	0.705938	0.924984		-1.37928	4.62093	0.0490438	0.150147		0.274308	5.20503	0.692806	0.926724
unitig32_193	17.51	44.05	61.46	37.65		1.14657	5.20851	0.0925441	0.309498		1.2391	5.34054	0.0689355	0.361303		1.61372	5.66398	0.0189751	0.0776899		0.0636709	5.75331	0.92647	1
unitig32_194	6.47	5.37	7.11	1.6		-2.03258	2.04358	0.0174854	0.114604		-0.366689	2.6285	0.680978	0.913808		-0.0754684	2.81483	0.957778	0.998991		1.63963	1.87003	0.0678523	0.345041
unitig32_195	6.73	6.79	3.68	4.88		-0.470095	2.28544	0.61235	0.833589		-0.113839	2.5071	0.949189	1		-1.05992	2.15968	0.198245	0.378722		0.327857	2.27007	0.697454	0.92845
unitig32_196	12.59	8.78	10.26	9.99		-0.30121	4.00304	0.688606	0.878886		-0.629664	3.92618	0.379704	0.748605		-0.498509	4.03003	0.479862	0.66327		-0.357296	3.74228	0.627782	0.894163
unitig32_197	3.03	1.7	2.77	3		0.0980452	1.73074	1	1		-0.882202	1.36684	0.366588	0.742308		-0.330639	1.63158	0.824298	0.913923		-1.01001	1.41556	0.25882	0.649695
unitig32_198	8.86	3.7	4.93	3.86		-1.13891	2.87732	0.140892	0.39393		-1.36838	2.86234	0.0715691	0.365145		-1.02533	3.01873	0.178732	0.354125		-0.258124	2.18597	0.789628	0.962926
unitig32_199	12.57	8.03	7.7	7.95		-0.631627	3.87904	0.379901	0.668344		-0.739449	3.89945	0.296001	0.683839		-0.908898	3.88489	0.197967	0.378475		-0.136589	3.53539	0.867337	0.990178
unitig32_200	10.78	9.42	8.81	2.49		-2.04233	2.93027	0.00851169	0.0726933		-0.275518	3.56393	0.727525	0.932176		-0.47271	3.52484	0.509416	0.688308		1.73936	2.80214	0.0247327	0.19112
unitig32_201	2.84	2.46	2.76	3.4		0.359373	1.86655	0.700163	0.887262		-0.260958	1.61795	0.824298	0.971211		-0.171513	1.70505	0.913871	0.972687		-0.649635	1.77547	0.477216	0.814284
unitig32_202	4.67	3.14	2.63	3.69		-0.297375	1.35161	0.792443	0.927992		-0.661543	1.25497	0.573302	0.862957		-1.01621	1.16687	0.302645	0.497315		-0.393076	1.08629	0.683327	0.923117
unitig32_203	36.16	24.01	14.28	28.66		-0.297872	6.12816	0.656692	0.863447		-0.688105	6.03108	0.301219	0.688484		-1.53788	5.8083	0.0244504	0.0926036		-0.419077	5.84042	0.52975	0.844432
unitig32_204	69.29	33	22.59	5.02		-3.7206	4.93054	1.41e-06	7.92e-05		-1.16957	5.42865	0.0858813	0.395822		-1.81216	5.30563	0.00877479	0.0453972		2.52329	3.95893	0.000740797	0.0174525
unitig32_205	4.96	5.49	3.81	3.49		-0.465414	3.39269	0.521287	0.776031		0.0417441	3.69481	0.976771	1		-0.587474	3.45205	0.429539	0.620713		0.478545	3.46507	0.516759	0.841124
unitig32_206	134.55	170.3	111.3	153.39		0.225265	7.02969	0.73384	0.901432		0.242985	7.10611	0.714473	0.929191		-0.4731	6.81232	0.476377	0.660762		-0.011118	7.19356	0.988293	1
unitig32_207	3.9	3.84	9.24	2.32		-0.816073	0.670141	0.542974	0.788185		-0.0826326	1.00447	1	1		1.02147	1.65698	0.298081	0.492679		0.707309	0.662246	0.580436	0.873296
unitig32_208	3.91	9.45	24.48	5.84		0.638572	2.79796	0.423254	0.709084		1.202	3.2283	0.117192	0.456792		2.46603	4.24146	0.00104444	0.0102355		0.534679	3.3937	0.460592	0.802331
unitig32_209	15.5	49.13	64.07	35.57		1.235	4.61597	0.0753633	0.275962		1.56459	4.9214	0.0247516	0.211933		1.84459	5.18587	0.00830002	0.0437103		0.300716	5.30662	0.656653	0.90951
unitig32_210	1461.87	2565.48	2551.88	5584.71		1.97121	10.5047	0.00361542	0.0394431		0.715158	9.6743	0.276835	0.671982		0.604717	9.65806	0.357203	0.552308		-1.2849	10.7351	0.0529945	0.301095
unitig32_211	510.22	435.24	421.89	670.28		0.431312	8.65703	0.5115	0.769525		-0.325275	8.33841	0.620717	0.889565		-0.472796	8.32597	0.472203	0.65718		-0.785432	8.57865	0.233345	0.625773
unitig32_212	59.39	42.29	49.06	66.02		0.191155	5.0624	0.781686	0.923969		-0.591234	4.76052	0.392528	0.752977		-0.476368	4.85859	0.484852	0.668755		-0.811289	4.86433	0.231358	0.623998
unitig32_213	16.56	22.85	27.45	24.38		0.582731	3.22581	0.448598	0.724052		0.371014	3.16958	0.617763	0.886834		0.522893	3.30856	0.48504	0.668755		-0.24063	3.40936	0.738386	0.941879
unitig32_214	46.35	32.61	30.08	21.81		-1.05319	4.52652	0.130761	0.376757		-0.601139	4.75651	0.382981	0.750876		-0.828676	4.71844	0.23162	0.417388		0.423366	4.20809	0.544247	0.850975
unitig32_215	18.39	5.49	9.94	3.49		-2.34119	3.37317	0.00238093	0.029388		-1.84347	3.52915	0.013195	0.153168		-1.09686	3.78596	0.12136	0.27398		0.469695	2.17502	0.580886	0.873296
unitig32_216	11.38	13.95	24.96	22.89		1.04142	3.55309	0.156872	0.416177		0.193308	3.11037	0.831006	0.97505		0.929069	3.60023	0.20811	0.390189		-0.877207	3.64214	0.225225	0.615485
unitig32_217	242.67	595.73	482.74	323.1		0.451265	8.26112	0.492716	0.757164		1.20012	8.80621	0.0707743	0.363503		0.793625	8.58699	0.228893	0.414322		0.720015	8.93515	0.273908	0.667279
unitig32_218	57.47	40.93	90.51	27.81		-1.00719	6.36586	0.132564	0.378939		-0.583805	6.58771	0.379807	0.748633		0.457201	7.14987	0.489988	0.673426		0.394589	6.05299	0.556179	0.857807
unitig32_219	78.37	76.28	84.05	82.18		0.10608	5.06404	0.88107	0.974676		-0.134969	5.00946	0.848005	0.981616		-0.0978104	5.07831	0.889878	0.955903		-0.269895	5.04665	0.696121	0.927859
unitig32_220	62.64	67.36	64.79	35.68		-0.774021	5.65078	0.247437	0.53358		0.00875516	6.05903	0.995351	1		-0.150075	6.03224	0.824165	0.913923		0.754006	5.70363	0.259644	0.651073
unitig32_221	46.04	46.4	28.84	21.93		-1.03107	4.14525	0.143244	0.397859		-0.0847782	4.59913	0.912013	1		-0.872869	4.31247	0.207346	0.389187		0.917709	4.14392	0.185489	0.564795
unitig32_222	161.44	1433.96	89.74	47.81		-1.71753	6.45057	0.0116167	0.0886456		3.05457	9.35377	1.58e-05	0.00226651		-1.04588	6.75552	0.117537	0.268054		4.74339	9.2086	5.96e-10	8.57e-08
unitig32_223	60.29	612.59	38.82	10.84		-2.43242	4.02472	0.00100127	0.01572		3.24777	7.2431	6.5e-06	0.00123374		-0.83314	4.54576	0.233111	0.418741		5.65235	7.09029	4.89e-12	1.3e-09
unitig32_224	73.75	88.59	32.53	16.01		-2.16461	5.79451	0.00189878	0.0252028		0.168213	6.66208	0.802371	0.963255		-1.37937	6.09105	0.0416227	0.133912		2.3042	5.98011	0.000934252	0.0205705
unitig32_225	947.3	1198.16	1633.27	745.16		-0.308545	7.91864	0.639398	0.85204		0.242778	8.25824	0.712151	0.927973		0.586931	8.50635	0.372457	0.566905		0.522491	8.10337	0.427103	0.784519
unitig32_226	566.16	791.98	722.84	295.35		-0.901057	8.58077	0.172484	0.439314		0.38812	9.23638	0.554103	0.852421		0.153547	9.15944	0.815079	0.909886		1.26035	8.88752	0.0579294	0.314384
unitig32_227	14.72	15.68	14.35	4.98		-1.46802	1.77889	0.0946183	0.312255		0.020664	2.40826	1	1		-0.228977	2.33392	0.828551	0.916483		1.462	1.87179	0.101443	0.426443
unitig32_228	38.12	47.7	47.47	27.17		-0.455214	4.71395	0.510689	0.768716		0.222823	5.10765	0.753848	0.948086		0.111696	5.09957	0.882289	0.951728		0.649297	4.89273	0.339766	0.722762
unitig32_229	1239.54	1654.85	545.84	3712.77		1.62037	11.6044	0.015554	0.107267		0.320831	10.8141	0.624053	0.890729		-1.38216	10.1643	0.037919	0.12606		-1.32838	11.744	0.0456167	0.276079
unitig32_230	65.45	42.47	76.11	51.92		-0.287732	4.34865	0.680906	0.874801		-0.712203	4.23401	0.306292	0.693278		0.0240359	4.61506	0.987407	1		-0.45333	4.05349	0.516325	0.841124
unitig32_231	35.27	57.19	98.44	74.05		1.11886	4.31888	0.113983	0.349555		0.615203	4.0635	0.394588	0.752977		1.29211	4.55959	0.0671065	0.18419		-0.5326	4.5731	0.437241	0.787443
unitig32_232	64.34	47.43	16.36	38.28		-0.715452	4.46588	0.301755	0.590063		-0.542642	4.5991	0.435718	0.783314		-2.17303	4.16591	0.00281425	0.0204021		0.144061	4.2085	0.845726	0.983027
unitig32_233	24.22	72.02	44.96	123.21		2.38211	5.20478	0.000834964	0.013708		1.47407	4.56533	0.0353619	0.257051		0.692336	4.09032	0.335083	0.530252		-0.937037	5.60204	0.164412	0.53708
unitig32_234	1.9	8.6	10.95	7.02		1.88745	1.75864	0.0447917	0.204379		2.06285	1.96079	0.0312329	0.242242		2.30639	2.20088	0.011508	0.0547891		0.145833	2.42252	0.907908	1
unitig32_235	81.4	55.97	41.88	55.42		-0.516804	5.3652	0.444986	0.721208		-0.631032	5.38428	0.351033	0.73022		-1.15542	5.2476	0.0918274	0.227663		-0.143046	5.07957	0.837294	0.980616
unitig32_236	21.84	17.02	18.01	32.07		0.591531	4.56957	0.388095	0.677964		-0.450437	4.09781	0.519173	0.835519		-0.476697	4.13624	0.511111	0.689829		-1.07094	4.44916	0.122526	0.46892
unitig32_237	54.87	24.34	12.31	25.67		-1.05806	7.0837	0.112217	0.347035		-1.26812	7.08471	0.0582469	0.332941		-2.35398	6.89012	0.000685457	0.00773168		-0.238888	6.41065	0.718461	0.934309
unitig32_238	1.69	0.47	0.62	0.09		-4.07684	1.61367	0.000127312	0.00322282		-1.9603	1.91668	0.0269514	0.220923		-1.65641	2.02964	0.0495298	0.150938		2.10176	0.264915	0.0999758	0.423491
unitig32_239	178.19	955.77	1097.88	1509.34		3.12069	8.2571	1.16e-05	0.000516978		2.32796	7.63839	0.000743781	0.0320812		2.42496	7.77113	0.000469134	0.00599418		-0.821603	8.80681	0.21258	0.599881
unitig32_240	161.66	593.79	877.67	312.51		0.988479	6.97499	0.137982	0.38875		1.77993	7.61265	0.00861908	0.121849		2.24106	8.03273	0.00111062	0.0107441		0.762615	7.87609	0.247915	0.641115
unitig32_241	64.75	329.87	278.22	59.84		-0.0677831	3.97354	0.942509	1		2.25734	5.5975	0.00131695	0.043321		1.90965	5.37139	0.00630252	0.0355522		2.2965	5.54752	0.00109432	0.023076
unitig32_242	3.78	9.33	8.04	0.69		-2.30229	1.94793	0.012692	0.0938856		1.20541	3.48095	0.107908	0.439807		0.886947	3.3214	0.227416	0.4128		3.48274	3.05049	5.24e-05	0.00220801
unitig32_243	0.39	3.65	4.43	0.81		0.559569	-0.196955	1	1		2.64441	1.06793	0.0381992	0.265572		2.85006	1.27592	0.0182584	0.0759707		2.05969	1.01402	0.0456519	0.276079
unitig32_244	11.16	34.23	35.95	45.11		2.04385	5.07171	0.00374464	0.040539		1.51148	4.73358	0.0302794	0.23724		1.47936	4.7625	0.0335727	0.115879		-0.561318	5.54896	0.403339	0.765615
unitig32_245	6.83	7.31	8.7	2.92		-1.20909	2.60256	0.131224	0.376757		-0.00707524	3.15148	1	1		0.130481	3.27284	0.907115	0.967802		1.17411	2.66535	0.122363	0.46892
unitig32_246	38.28	43.6	30.13	20.92		-0.83188	5.79616	0.215152	0.493305		0.0921772	6.26813	0.891687	0.998589		-0.544181	6.02389	0.415429	0.607573		0.895287	5.90237	0.182212	0.560802
unitig32_247	4.86	4.5	3.67	3.34		-0.495118	3.72262	0.490539	0.755328		-0.213125	3.9122	0.78198	0.954636		-0.612353	3.78589	0.405471	0.597639		0.2533	3.65349	0.737745	0.941879
unitig32_248	0	1.57	0	0.78		NA	NA	NA	unitig32_248		-0.945957	0.52381	0.835519	NA		NA	NA	unitig32_248	0.774631		1	1
unitig32_249	10.99	11.2	14.9	20.59		0.938376	4.84801	0.171567	0.438911		-0.0685325	4.33568	0.924739	1		0.2344	4.54408	0.751932	0.869838		-1.03586	4.86554	0.130437	0.48111
unitig32_250	3.15	7.07	7.21	7.32		1.20143	2.17329	0.162194	0.423718		0.995092	2.10808	0.271828	0.66571		0.925334	2.11551	0.301975	0.496503		-0.235536	2.52705	0.785998	0.961458
unitig32_251	3.33	9.66	8.64	10.52		1.70568	3.14208	0.0259559	0.145373		1.45196	3.02926	0.0589719	0.334821		1.17891	2.89254	0.131434	0.28858		-0.28285	3.62988	0.695707	0.927719
unitig32_252	3.43	7.02	5.66	8.17		1.24452	1.10416	0.26675	0.555647		0.928416	0.978635	0.394643	0.752977		0.515589	0.796343	0.700311	0.834911		-0.345937	1.36644	0.732196	0.939781
unitig32_253	6.79	4.94	10.29	2.9		-1.17708	1.03496	0.26675	0.555647		-0.537612	1.30385	0.683327	0.914781		0.383855	1.79264	0.7571	0.873553		0.613013	0.793789	0.612094	0.885631
unitig32_254	2.99	3.31	5.7	2.86		-0.0529577	2.18826	1	1		0.0642321	2.30827	0.942485	1		0.719567	2.72962	0.362123	0.557679		0.088553	2.25106	1	1
unitig32_255	0.52	0.57	2.96	0.57		0.161023	-0.345433	1	1		0.0398197	-0.351861	1	1		2.23841	0.833039	0.109379	0.255499		-0.149942	-0.402416	1	1
unitig32_256	32.89	17.79	16.07	17.01		-0.912982	4.66605	0.187779	0.456783		-0.97836	4.70709	0.153671	0.52237		-1.22885	4.67477	0.0771775	0.204099		-0.0941548	4.16604	0.913078	1
unitig32_257	4.59	2.18	0.59	1.3		-1.80105	2.00416	0.0347653	0.174636		-1.14704	2.23523	0.17611	0.550328		-3.11136	1.85915	0.001642	0.0141662		0.626858	1.35588	0.567307	0.864628
unitig32_258	11.32	8.01	7.59	8.79		-0.317622	4.41199	0.655079	0.863447		-0.59402	4.35809	0.398969	0.75473		-0.77295	4.33726	0.263488	0.455747		-0.305232	4.16474	0.661646	0.91244
unitig32_259	63.62	53.84	24.02	125.54		1.01754	4.54655	0.146643	0.402649		-0.342677	3.85247	0.636526	0.898309		-1.60941	3.45239	0.0314265	0.110816		-1.38927	4.48083	0.0445829	0.273194
unitig32_260	36.46	41.28	33.21	7.97		-2.16781	3.97152	0.00329247	0.0370761		0.0834606	4.80274	0.912299	1		-0.330935	4.65248	0.643211	0.794439		2.2232	4.10412	0.00221491	0.0377783
unitig32_261	4.33	1.27	2.6	2.1		-0.990562	1.36975	0.366588	0.655285		-1.83961	1.17671	0.078524	0.384612		-0.926712	1.47975	0.394949	0.588264		-0.878769	0.603414	0.479207	0.815775
unitig32_262	101.21	69.78	44.49	35.11		-1.48902	5.17004	0.0300894	0.158607		-0.634829	5.51626	0.347387	0.728196		-1.38137	5.31359	0.0442388	0.14038		0.82551	4.78731	0.22847	0.621052
unitig32_263	9.18	19.22	19.93	8.07		-0.149295	3.87798	0.857064	0.962146		0.974347	4.58604	0.162911	0.533816		0.924456	4.60521	0.184664	0.362074		1.09498	4.50346	0.11279	0.451281
unitig32_264	19.87	20.77	56.68	2.95		-2.70692	4.29966	0.000268203	0.00578483		-0.0380837	5.15422	0.956821	1		1.30848	6.02343	0.0534822	0.158374		2.64089	4.3311	0.000335709	0.00968336
unitig32_265	2.82	0.49	2.24	0.34		-2.91403	0.69902	0.0295884	0.157241		-2.48574	0.781141	0.0295884	0.233776		-0.493046	1.36483	0.597593	0.758184		0.407924	-0.556088	1	1
unitig32_266	7.13	11.58	9.58	4.01		-0.799655	4.51747	0.243365	0.527884		0.602349	5.26559	0.370948	0.742308		0.224211	5.10014	0.750166	0.868635		1.37336	4.97224	0.045173	0.274503
unitig32_267	23.9	73.65	270.4	31.63		0.43874	6.11846	0.514863	0.772112		1.52523	6.90417	0.0238645	0.208698		3.29876	8.43471	4.31e-06	0.000251906		1.05767	7.00277	0.112008	0.449783
unitig32_268	287.1	1298.74	1657.2	1067.35		1.9323	7.97211	0.0044475	0.0453757		2.0812	8.15836	0.00230329	0.0578348		2.33005	8.41404	0.000712848	0.00795764		0.120051	8.75751	0.855088	0.984849
unitig32_269	15.31	25.11	40.05	17.29		0.21897	3.42873	0.779995	0.922755		0.615426	3.72179	0.400332	0.755499		1.18789	4.14464	0.0979624	0.236717		0.367712	3.77505	0.616398	0.888942
unitig32_270	55.77	52.8	24.65	32.21		-0.753382	6.35891	0.257079	0.544843		-0.175448	6.66931	0.794662	0.958588		-1.37788	6.27139	0.0411544	0.13296		0.549131	6.29869	0.408128	0.768715
unitig32_271	532.16	255.36	77.44	447.02		-0.213922	10.3155	0.743842	0.906854		-1.15559	10.0202	0.0810772	0.38989		-2.97955	9.70826	2.33e-05	0.000831404		-0.97051	9.86199	0.14143	0.503528
unitig32_272	3.55	1.65	1.15	4.62		0.390028	2.59883	0.672668	0.868911		-1.21313	1.95836	0.146339	0.51186		-1.86069	1.81953	0.0421466	0.135188		-1.63305	2.22912	0.0448413	0.273265
unitig32_273	49.52	41.78	70.32	48.59		0.0085436	5.31818	1	1		-0.340985	5.21828	0.618344	0.887366		0.305782	5.59325	0.654328	0.802446		-0.378378	5.20635	0.577	0.872188
unitig32_274	0.75	2.07	1.96	1.64		1.02412	0.716712	0.438083	0.718557		1.24317	0.90897	0.283653	0.674324		1.06854	0.852978	0.352672	0.547261		0.189829	1.13126	1	1
unitig32_275	15.41	7.88	8.66	6.63		-1.18081	3.85451	0.0965983	0.316688		-1.05397	3.95705	0.135682	0.49182		-1.02194	4.01653	0.149342	0.313372		0.0981925	3.28441	0.921013	1
unitig32_276	39.36	16.43	6.87	5		-2.9267	4.26269	0.000110195	0.00289348		-1.36221	4.6296	0.0513902	0.312975		-2.69829	4.39909	0.000263376	0.00424097		1.53657	3.23638	0.0404834	0.258612
unitig32_277	0.26	0.16	1.14	0		-4.8584	-0.691633	0.285714	0.571902		-1.07306	-0.34081	0.726708	0.931553		1.57776	0.842996	0.187026	0.363845		4.01607	-1.1431	0.52381	0.841204
unitig32_278	33	128.35	150.3	26.04		-0.304966	4.05042	0.664171	0.866199		1.86349	5.47254	0.00750649	0.11284		1.98938	5.62356	0.0042174	0.0268823		2.13985	5.37512	0.00214888	0.0369494
unitig32_279	9.79	12.05	6.84	6.91		-0.465955	5.36815	0.493692	0.757431		0.20361	5.75572	0.762641	0.950521		-0.715614	5.38335	0.288588	0.482345		0.640788	5.53547	0.343558	0.725752
unitig32_280	27.11	31.28	32.45	40.58		0.623583	4.81862	0.364489	0.653329		0.11616	4.59865	0.874102	0.9923		0.0629565	4.62184	0.937094	0.986023		-0.536315	4.9065	0.431572	0.784786
unitig32_281	55.54	30.06	27.46	19.58		-1.46248	5.91968	0.0316819	0.164137		-0.982439	6.13073	0.142684	0.505765		-1.21462	6.10657	0.0717449	0.194468		0.451281	5.32472	0.506502	0.835009
unitig32_282	0	0	0	0		NA	NA	NA	NA		NA	NA	NA	NA		NA	NA	NA	NA
unitig32_283	21.79	89.19	227.8	41.32		0.959707	4.25892	0.171775	0.439061		1.93554	5.03272	0.00587873	0.0978322		3.18527	6.13791	1.21e-05	0.000509586		0.947018	5.24981	0.161569	0.531271
unitig32_284	33.2	18.8	24.1	18.11		-0.834156	5.34734	0.216958	0.49609		-0.916608	5.3829	0.176111	0.550328		-0.66509	5.52693	0.324442	0.518709		-0.111257	4.88518	0.876155	0.992639
unitig32_285	225.65	967.47	1269.19	942.11		2.0987	6.30263	0.00242986	0.0297746		2.00411	6.2948	0.00372158	0.0765518		2.29207	6.5803	0.00098546	0.00989425		-0.123473	6.99351	0.852558	0.98464
unitig32_286	37.57	159.73	265.21	41.86		0.192165	5.77231	0.782284	0.924289		1.99106	7.05294	0.00363287	0.0760205		2.61992	7.62548	0.000176373	0.00337776		1.7701	7.06309	0.0090246	0.100528
unitig32_287	39.98	34.93	32.39	24.04		-0.694097	6.22123	0.297381	0.584748		-0.290765	6.45593	0.66341	0.907339		-0.502209	6.41513	0.452322	0.639633		0.374525	6.09689	0.575184	0.87096
unitig32_288	56.84	86.16	73.18	24.84		-1.15798	5.16253	0.0887177	0.302585		0.503787	5.97289	0.450832	0.796517		0.163673	5.83398	0.809564	0.906929		1.63309	5.57372	0.0169687	0.152054
unitig32_289	96.4	133.74	134.16	75.51		-0.316098	5.37696	0.642404	0.854491		0.377269	5.79516	0.579355	0.866269		0.279601	5.79192	0.680246	0.822082		0.664584	5.64241	0.319434	0.707124
unitig32_290	7.37	15.94	24.97	13.62		0.904011	3.38432	0.211422	0.488701		0.996596	3.51318	0.172504	0.545382		1.54434	3.94745	0.0357515	0.120891		0.0636956	3.82835	0.945476	1
unitig32_291	9.68	16.72	17.22	7.47		-0.3289	3.92243	0.651976	0.860917		0.701269	4.53905	0.31434	0.702467		0.638605	4.55216	0.355536	0.550733		1.00152	4.39248	0.148929	0.510915
unitig32_292	49.68	32.96	39.92	54.41		0.168753	3.24562	0.845764	0.95627		-0.685409	2.91256	0.353571	0.731007		-0.512388	3.03176	0.494252	0.677261		-0.883247	3.00578	0.24263	0.634793
unitig32_293	7.55	5.73	3.97	11.81		0.669867	3.15457	0.374655	0.662581		-0.496865	2.61498	0.516859	0.835519		-1.14851	2.41308	0.171981	0.34445		-1.19601	3.01114	0.104496	0.433797
unitig32_294	3.35	3.22	1.81	2.69		-0.244096	1.74144	0.917982	0.989613		-0.08317	1.87448	1	1		-1.01923	1.53022	0.298081	0.492679		0.132492	1.73287	0.928218	1
unitig32_295	2.35	2.58	6.94	4.29		0.91741	2.59888	0.244179	0.528825		0.066559	2.17585	1	1		1.36294	3.01966	0.080032	0.208664		-0.880174	2.62994	0.236841	0.629175
unitig32_296	14.48	12.39	10.05	9.92		-0.508685	5.65414	0.449789	0.724513		-0.320627	5.80126	0.63077	0.896224		-0.72769	5.68323	0.279951	0.475115		0.159252	5.52381	0.817513	0.97387
unitig32_297	0	0	0	0		NA	NA	NA	NA		NA	NA	NA	NA		NA	NA	NA	NA
unitig32_298	4.66	5.85	5.84	3.05		-0.558453	2.90417	0.491653	0.75663		0.233938	3.34587	0.769296	0.950521		0.123315	3.3368	0.881549	0.951171		0.76397	3.09376	0.30393	0.695577
unitig32_299	3.3	5.51	7.3	10.04		1.62001	1.76385	0.0781883	0.282256		0.641987	1.21433	0.662736	0.907038		0.961715	1.45317	0.366588	0.561744		-1.0082	1.9034	0.220226	0.609089
unitig32_300	0	0	0	0.36		3.90658	-0.936891	0.52381	0.776031		NA	NA	NA	NA		NA	NA	unitig32_300	-4.16307		0.52381	0.841204
unitig32_301	4.67	8.78	5.68	2.21		-0.882487	0.49966	0.497906	0.759262		0.810439	1.31156	0.494712	0.827906		0.162073	1.00652	1	1		1.66862	1.01634	0.0967864	0.415422
unitig32_302	12.66	17.81	10.88	9.21		-0.420905	5.6145	0.531117	0.780701		0.39739	6.08999	0.554905	0.852421		-0.415936	5.73337	0.534968	0.70743		0.789512	5.89942	0.238261	0.630075
unitig32_303	4.58	4.75	12	3.43		-0.36638	4.00681	0.620188	0.839528		-0.0435235	4.2234	0.967496	1		1.19543	5.01643	0.0826218	0.21338		0.294128	4.03015	0.675112	0.918754
unitig32_304	2.14	2.56	2.41	1.04		-0.95563	1.68481	0.283853	0.571902		0.162301	2.22562	0.87929	0.994067		-0.0536604	2.16323	1	1		1.09063	1.84624	0.226004	0.616024
unitig32_305	7.96	2.11	5.72	5.92		-0.320132	1.62468	0.824298	0.946934		-1.83961	1.17671	0.078524	0.384612		-0.608378	1.6016	0.567307	0.733918		-1.5505	0.988844	0.14853	0.510404
unitig32_306	3.16	2.06	2.01	5.95		0.946912	3.63734	0.189901	0.459351		-0.692885	2.84187	0.385936	0.751947		-0.844997	2.82968	0.270071	0.463746		-1.66914	3.46666	0.0221907	0.180047
unitig32_307	21.36	16.21	25.97	29.85		0.519826	3.8919	0.471039	0.740412		-0.493205	3.44308	0.515107	0.835519		0.0830981	3.76667	0.933033	0.983458		-1.04208	3.74817	0.145033	0.508117
unitig32_308	13.7	7.73	13.61	8.19		-0.696003	3.73364	0.332035	0.621096		-0.914544	3.71373	0.199449	0.577128		-0.202635	4.05969	0.783139	0.890537		-0.247323	3.30249	0.746206	0.945994
unitig32_309	2.73	4.41	3	5.37		1.00428	4.14518	0.15668	0.415928		0.591132	3.95217	0.413395	0.767017		-0.0630613	3.64266	0.95131	0.995331		-0.44208	4.39917	0.521279	0.841204
unitig32_310	7.95	6.5	5.59	1.94		-2.01967	2.75805	0.00941013	0.0772453		-0.384742	3.33725	0.606931	0.881908		-0.697397	3.25375	0.340729	0.535126		1.60761	2.5546	0.0418372	0.263488
unitig32_311	119.35	150.53	96.38	50.08		-1.20984	4.70389	0.0802035	0.286489		0.23705	5.38051	0.730919	0.934553		-0.503213	5.07462	0.457162	0.643851		1.41827	4.92305	0.0399185	0.256745
unitig32_312	10.93	28.69	56.53	28.88		1.44681	5.05791	0.0373069	0.182329		1.30104	5.02189	0.05925	0.335063		2.17824	5.74232	0.00189161	0.0155508		-0.174669	5.56958	0.801493	0.96827
unitig32_313	8.59	20.6	40.24	4.64		-0.825857	2.03854	0.301975	0.590063		1.15393	3.13982	0.123716	0.470247		2.02601	3.83135	0.0063612	0.035717		1.95228	2.88826	0.011676	0.117949
unitig32_314	42.42	52.22	36.63	93.46		1.17916	5.94415	0.0815164	0.28888		0.207833	5.41235	0.763947	0.950521		-0.407718	5.1633	0.547659	0.716474		-1.00022	6.05671	0.135575	0.49114
unitig32_315	29.83	98.2	133.04	58.82		1.01555	6.26809	0.130904	0.376757		1.6212	6.76635	0.0167536	0.173148		1.95753	7.07801	0.0041719	0.0267579		0.576811	7.06192	0.383026	0.755264
unitig32_316	51.89	57.43	58.15	88.96		0.813666	5.98425	0.225897	0.507686		0.0482497	5.61145	0.94941	1		-0.0348781	5.62059	0.961911	1		-0.794294	6.04846	0.2337	0.626328
unitig32_317	7.63	5.47	8.25	0.86		-3.22847	1.77586	0.000977184	0.0155889		-0.591206	2.44077	0.467198	0.810264		-0.113399	2.70464	0.910267	0.970189		2.61592	1.42219	0.00697492	0.0852719
unitig32_318	0.2	0.59	0	0		NA	NA	NA	unitig32_318		-0.362858	0.658385	0.904744	NA		NA	NA	unitig32_318	4.97078		0.161491	0.531221
unitig32_319	0.39	1.48	3.27	0.71		0.87151	-0.0628363	0.726708	0.896403		1.72843	0.450799	0.333681	0.715792		2.78636	1.22787	0.023239	0.0895368		0.828981	0.517537	0.438083	0.787548
unitig32_320	228.68	987.22	1197.48	1399.3		2.64887	8.20412	0.000147085	0.00358388		2.01209	7.7418	0.00320536	0.0720694		2.18797	7.93569	0.00141905	0.0126728		-0.665636	8.75582	0.31158	0.700408
unitig32_321	125.62	593.24	893.32	517.05		2.07999	6.40132	0.00260585	0.0313406		2.1445	6.52133	0.00192389	0.0538608		2.63234	6.98047	0.000180764	0.00339293		0.0356425	7.16751	0.958585	1
unitig32_322	7.78	5.84	9.58	14.8		0.985088	3.30934	0.187792	0.456783		-0.495401	2.57211	0.539497	0.843323		0.132468	2.92199	0.88223	0.951728		-1.50989	3.18545	0.0414423	0.262037
unitig32_323	7.11	8.95	11.23	6.14		-0.177064	4.12556	0.811415	0.940957		0.228806	4.39753	0.757823	0.949413		0.457354	4.57734	0.511859	0.690399		0.377125	4.29444	0.592189	0.87681
unitig32_324	1.16	1.61	3.92	1.14		0.0689034	1.29147	1	1		0.379462	1.50954	0.717697	0.930515		1.57881	2.31918	0.0656162	0.181037		0.282226	1.48134	0.832809	0.979935
unitig32_325	50.55	16.83	18.91	14.74		-1.73415	5.32948	0.0118984	0.0901439		-1.68244	5.40581	0.014518	0.158115		-1.6124	5.47306	0.0191239	0.078041		0.0229631	4.30804	0.986843	1
unitig32_326	20.54	8.33	10.56	9.3		-1.0892	3.91287	0.122101	0.363124		-1.38874	3.88159	0.0514591	0.312975		-1.1535	4.00173	0.10658	0.251453		-0.328317	3.20048	0.674836	0.918754
unitig32_327	11.53	4.65	3.8	2.47		-2.2071	2.17412	0.00877551	0.0739616		-1.41748	2.40908	0.0705429	0.363475		-1.82536	2.34278	0.0280835	0.102346		0.762828	1.31159	0.479616	0.816079
unitig32_328	1.08	1.06	0.97	0.69		-0.603424	1.59104	0.567307	0.807558		-0.08317	1.87448	1	1		-0.362894	1.79026	0.686852	0.826091		0.492374	1.59117	0.622031	0.891305
unitig32_329	7.66	4.8	14.04	3.12		-1.24258	3.24728	0.093229	0.310213		-0.760195	3.47329	0.291353	0.67994		0.671202	4.23998	0.338497	0.532375		0.453973	2.83684	0.562277	0.861862
unitig32_330	4.12	9.48	9.09	8.57		1.09809	2.39955	0.206388	0.481776		1.09934	2.46982	0.171981	0.544918		0.934644	2.41487	0.263542	0.455747		-0.0277822	2.83024	1	1
unitig32_331	45.4	77.02	58.45	25.8		-0.774262	5.20819	0.25365	0.540204		0.668984	5.98644	0.317094	0.705266		0.167341	5.7502	0.809773	0.906929		1.41453	5.70781	0.0374369	0.246967
unitig32_332_partial	3.66	2.94	0	0		-7.31935	0.944877	0.000390825	0.00766687		-0.380077	1.81657	0.767877	0.950521		-7.43487	0.984815	0.000290613	0.00445546		7.18192	0.776479	0.000530405	0.0135838
unitig36_1	188.16	153.18	122.43	206.02		0.168429	8.18525	0.798284	0.932637		-0.39294	7.98193	0.550544	0.849256		-0.818914	7.86372	0.21536	0.397978		-0.590213	8.06392	0.369959	0.7459
unitig36_2	472.1	383.89	206.26	493.73		0.102255	9.91164	0.876079	0.972198		-0.394596	9.74254	0.547171	0.847447		-1.39356	9.44268	0.0365276	0.12249		-0.525692	9.7852	0.422891	0.781049
unitig36_3	1.75	2.98	6.13	1.31		-0.411546	1.30372	0.683327	0.87671		0.674684	1.91017	0.508053	0.835519		1.62654	2.59306	0.0473359	0.14689		1.05884	1.72171	0.232558	0.624846
unitig36_4	234.18	183.8	141.91	527.28		1.20898	7.737	0.0697159	0.264263		-0.445515	6.86991	0.500683	0.830545		-0.921401	6.7371	0.165544	0.336187		-1.68337	7.66975	0.0124675	0.123466
unitig36_5	437.74	590.11	391.28	743.17		0.801328	9.27526	0.223821	0.505349		0.334984	9.06376	0.609669	0.883312		-0.360693	8.76854	0.582744	0.746941		-0.495187	9.45645	0.450335	0.795643
unitig36_6	7.1	29.47	3.56	0.93		-2.88315	4.12234	0.000136136	0.00339538		1.95693	6.30582	0.00452995	0.0851027		-1.19711	4.58304	0.0869035	0.219562		4.81247	5.98923	1.65e-09	2.12e-07
unitig36_7	25.56	44.08	36.65	48.54		0.958222	4.80001	0.160979	0.422726		0.689913	4.69675	0.319956	0.708461		0.321464	4.53124	0.650399	0.799319		-0.297194	5.10902	0.666238	0.916526
unitig36_8	7.89	19.93	38.93	14.5		0.916652	4.49922	0.188239	0.457345		1.24371	4.78798	0.0732033	0.370444		2.10472	5.48873	0.00265525	0.0195548		0.298214	5.08804	0.668499	0.917267
unitig36_9	8.17	81.33	108.51	14.2		0.824187	4.25951	0.237522	0.523662		3.20976	6.19656	1.04e-05	0.00171607		3.52266	6.53133	1.72e-06	0.000122492		2.35682	6.26327	0.000726231	0.0173564
unitig36_10	11.68	17.43	18.61	4.12		-1.4571	2.09113	0.0898965	0.305338		0.480084	2.97366	0.537095	0.842569		0.481449	3.02545	0.545785	0.715173		1.91019	2.51443	0.0182551	0.160058
unitig36_11	22.5	322.41	60.18	40.98		0.902476	5.71895	0.180719	0.450466		3.74523	8.10583	3.4e-07	0.000114948		1.22105	6.053	0.0711928	0.19328		2.81394	8.15797	6.12e-05	0.00251799
unitig36_12	280.58	59.22	78.02	21.34		-3.67338	7.25551	5.6e-07	3.67e-05		-2.34126	7.47338	0.000697451	0.0314493		-2.04622	7.57768	0.00272796	0.0199346		1.30345	5.34303	0.0553544	0.3079
unitig36_13	40.79	29.79	32.54	27.74		-0.514404	4.9863	0.449636	0.724513		-0.550762	5.03639	0.421665	0.772763		-0.520419	5.09942	0.444442	0.632552		-0.0651631	4.74024	0.941131	1
unitig36_14	29.08	54.08	113.81	50.79		0.844125	5.67324	0.212591	0.489378		0.799467	5.71211	0.236144	0.62838		1.7702	6.44857	0.00940872	0.0476843		-0.0735112	6.05348	0.912359	1
unitig36_15	8.73	15.21	28.08	4.38		-0.985767	3.19257	0.191295	0.460797		0.695937	4.06526	0.32086	0.708608		1.46959	4.639	0.0361983	0.121819		1.65347	3.73533	0.0215079	0.17684
unitig36_16	25.86	28.61	36.83	26.99		0.0999898	5.60337	0.886052	0.975681		0.0502065	5.6442	0.944392	1		0.315166	5.83696	0.639463	0.791077		-0.0786175	5.67375	0.912057	1
unitig36_17	6.71	2.42	4.57	3.65		-0.842478	2.3773	0.303322	0.591328		-1.58099	2.19692	0.0558668	0.326624		-0.757037	2.51134	0.333198	0.529274		-0.767635	1.67705	0.392904	0.759437
unitig36_18	0.61	0.75	1.72	0		-4.2981	-0.918876	0.52381	0.776031		0.0398197	-0.351861	1	1		1.34406	0.273265	0.442579	0.630853		4.57099	-0.922203	0.285714	0.676159
unitig36_19	49.35	73.17	46.9	47.96		-0.00304928	6.6011	1	1		0.473411	6.92581	0.473512	0.814293		-0.270832	6.59084	0.685494	0.825044		0.447635	6.90195	0.497554	0.828572
unitig36_20	1.36	0	0.51	0		-4.2981	-0.918876	0.52381	0.776031		-4.36857	-0.922485	0.52381	0.835519		-1.47984	-0.694151	1	1		NA	NA	NA
unitig36_21	10.7	0.74	2.76	0		-8.22765	1.75626	6.32e-06	0.000306943		-3.89317	1.88676	0.00013422	0.0107046		-2.1387	2.14893	0.0155279	0.0672481		4.57099	-0.922203	0.285714	0.676159
unitig36_22	7.52	5.34	2.74	6.76		-0.108392	4.79186	0.879236	0.973543		-0.584744	4.64481	0.397635	0.754009		-1.64267	4.34731	0.0212796	0.0841661		-0.505217	4.56783	0.46114	0.802521
unitig36_23	38.76	22.25	27.11	93.29		1.30221	6.33875	0.0529665	0.228336		-0.901528	5.2268	0.181932	0.557871		-0.718416	5.34481	0.284772	0.47943		-2.2327	6.18245	0.00131171	0.0265378
unitig36_24	24.58	4.17	2.68	16.23		-0.576373	3.88476	0.426871	0.712004		-2.62168	3.39912	0.000695806	0.0314493		-3.42141	3.3462	2.87e-05	0.000979465		-2.07495	2.953	0.00754926	0.0893496
unitig36_25	15.28	17.28	53.52	19.53		0.390028	2.59883	0.672668	0.868911		0.0810108	2.49665	0.949189	1		1.60504	3.51179	0.0314265	0.110816		-0.337975	2.65608	0.688962	0.924555
unitig36_26	11.88	10.17	26.01	8.82		-0.391154	3.47229	0.613601	0.834762		-0.320146	3.56708	0.68032	0.91336		0.92982	4.31343	0.188824	0.366503		0.0422815	3.35111	0.974771	1
unitig36_27	3741.42	6774.56	5091.09	10183.5		1.48224	11.4634	0.0263248	0.147012		0.760398	11.0364	0.247412	0.641237		0.245473	10.786	0.707597	0.839616		-0.750684	11.7572	0.253286	0.64527
unitig36_28	97.86	177.56	271.78	115.9		0.281399	7.55973	0.669952	0.868183		0.762668	7.91034	0.248288	0.641237		1.27387	8.30371	0.0558193	0.163163		0.452434	7.99878	0.491617	0.825272
unitig36_29	7.26	22.81	48.66	8.31		0.235904	3.84779	0.753114	0.912		1.56018	4.76942	0.0250775	0.213424		2.54958	5.60823	0.000373322	0.00519223		1.29559	4.79309	0.0607648	0.323354
unitig36_30	13.8	17.83	21.36	13.75		0.034409	5.66098	0.969519	1		0.273404	5.85383	0.68153	0.914114		0.433207	5.99507	0.519505	0.697497		0.210174	5.84723	0.754906	0.950084
unitig36_31	2.37	5.63	6.38	3.12		0.469577	2.39826	0.580886	0.814029		1.17524	2.90649	0.122363	0.468531		1.2504	3.01076	0.106896	0.251989		0.677032	3.00413	0.357297	0.738554
unitig36_32	2.54	4.53	2.7	2.94		0.252133	3.69138	0.748426	0.908987		0.735915	4.04085	0.301674	0.688484		-0.116732	3.61607	0.901428	0.963736		0.455028	4.1042	0.516624	0.841124
unitig37_1	2.97	6.14	11.75	3.67		0.33858	3.92636	0.635842	0.850371		0.947603	4.36382	0.181626	0.55751		1.78165	5.01081	0.0113289	0.0542079		0.580259	4.45163	0.3972	0.761408
unitig37_2	38.89	87.28	158.82	52.49		0.467414	6.24096	0.482613	0.749815		1.06779	6.68582	0.110062	0.444052		1.82822	7.29197	0.00717862	0.0391662		0.571544	6.82836	0.388912	0.758345
unitig37_3	119.72	162.89	141.83	179.47		0.622236	8.30194	0.344771	0.632928		0.348359	8.20909	0.596416	0.875629		0.0460225	8.09882	0.945216	0.991495		-0.30272	8.49788	0.644755	0.902387
unitig37_4	2.26	8.31	32.4	27.59		3.66865	4.78007	2.28e-06	0.00012418		1.80334	3.28675	0.0172087	0.176342		3.66319	4.89912	2.41e-06	0.000159508		-1.89469	5.04799	0.00660388	0.0819635
unitig37_5	2.09	2.68	3.52	2.67		0.382581	0.387357	1	1		0.258208	0.380795	1	1		0.545377	0.563183	0.822492	0.913743		-0.153446	0.446094	1	1
unitig37_6	16.86	49.1	149.07	57.6		1.80982	5.86233	0.00865906	0.0735064		1.44452	5.65615	0.0343023	0.255747		2.94439	6.92521	3.57e-05	0.00116379		-0.394188	6.36885	0.552509	0.855611
unitig37_7	106.74	60.58	38.02	126.51		0.282479	8.14427	0.667744	0.868183		-0.914059	7.67616	0.167562	0.539452		-1.68907	7.50166	0.012331	0.0571986		-1.22539	7.85418	0.0655653	0.338488
unitig37_8	3.36	2.79	3.61	3.64		0.145371	2.28763	0.883327	0.975465		-0.348589	2.10982	0.743746	0.94098		-0.0983201	2.27477	0.94052	0.988143		-0.523011	2.16566	0.54051	0.850075
unitig37_9	0.83	2.36	30.37	38.06		5.40733	4.54836	2.04e-09	2.74e-07		1.28762	1.19815	0.219277	0.604029		4.84479	4.14589	7.94e-08	1.12e-05		-4.15125	4.61893	1.97e-07	1.72e-05
unitig37_10	6.49	9.86	16.58	51.36		3.02508	6.74477	2.4e-05	0.000922795		0.512322	4.90936	0.460969	0.80381		1.15667	5.3732	0.0888475	0.22288		-2.54174	6.86122	0.000268173	0.00803286
unitig37_11	85.69	49.97	32.43	75.65		-0.142972	7.11604	0.831134	0.950526		-0.874573	6.87915	0.188604	0.56441		-1.59883	6.71184	0.0181401	0.0757012		-0.760453	6.77458	0.251094	0.643884
unitig37_12	11.12	17.93	42.33	15.37		0.508041	4.99341	0.458337	0.731586		0.597061	5.11346	0.385731	0.751947		1.73255	5.94566	0.0117624	0.0555637		0.0601813	5.30982	0.933445	1
unitig37_13	21.58	11.2	10.6	15.49		-0.437776	5.13251	0.522708	0.776031		-1.03813	4.96893	0.1305	0.482511		-1.22711	4.95805	0.073647	0.197603		-0.629216	4.68237	0.359409	0.74096
unitig37_14_partial	17.91	35.53	42.5	9.09		-0.935566	4.37447	0.176431	0.446012		0.891727	5.35286	0.190849	0.566396		1.04558	5.50624	0.125514	0.2803		1.79871	5.05989	0.00956253	0.103263
unitig40_1_partial	61.6	35.2	40.99	20.58		-1.54205	6.89899	0.0221773	0.131863		-0.9032	7.15822	0.174009	0.548067		-0.785879	7.2515	0.235047	0.421416		0.610056	6.33511	0.359081	0.74096
unitig40_2	0	0	0	0		NA	NA	NA	NA		NA	NA	NA	NA		NA	NA	NA	NA
unitig40_3	39.29	56.55	173.93	39.69		0.0526007	6.77339	0.937686	0.999009		0.428983	7.04429	0.517296	0.835519		1.94733	8.14456	0.0041882	0.0267806		0.347554	7.04496	0.598101	0.879463
unitig40_4	10.19	13.71	24.4	11.69		0.235719	3.28139	0.788912	0.926641		0.330607	3.39929	0.669885	0.90926		1.05864	3.8999	0.136074	0.296393		0.0660932	3.47346	0.953864	1
unitig40_5	32.2	41.51	19.29	33.5		0.0952336	5.4626	0.895379	0.980542		0.27104	5.62296	0.687913	0.917366		-0.931195	5.13404	0.171061	0.343498		0.146984	5.6443	0.82665	0.978247
unitig40_6	10.12	13.33	4.16	4.09		-1.27166	5.06077	0.0649992	0.254493		0.297745	5.78849	0.662501	0.907038		-1.48047	5.11499	0.0308523	0.109565		1.54075	5.32527	0.0245742	0.19093
unitig40_7	4.3	2.21	1.39	1.87		-1.1704	2.74645	0.121645	0.362406		-1.04483	2.84417	0.16191	0.532186		-1.81668	2.66385	0.0219721	0.0860226		0.097146	2.2044	0.946047	1
unitig40_8	1.81	8.75	10.32	7.85		2.07367	2.41834	0.0179855	0.117155		2.08188	2.49862	0.0127954	0.15024		2.22667	2.66541	0.00959873	0.0484159		-0.0212043	3.06997	1	1
unitig40_9	32.42	54.84	19.06	111.87		1.81863	5.16106	0.00919015	0.0762539		0.659429	4.42329	0.346604	0.727455		-0.976839	3.68482	0.167044	0.337912		-1.18818	5.3724	0.0802771	0.379002
unitig40_10	496.23	272.62	53.5	712.78		0.56048	8.79058	0.39389	0.682072		-0.959754	8.14789	0.147002	0.51215		-3.40845	7.72802	2.37e-06	0.000158362		-1.54909	8.52974	0.0207454	0.172242
unitig40_11	12	10.71	20.51	7.69		-0.602295	5.39569	0.37512	0.66302		-0.257777	5.60944	0.702923	0.923492		0.577622	6.10338	0.389438	0.58395		0.31573	5.29524	0.641969	0.901586
unitig40_12	0	0	0	0		NA	NA	NA	NA		NA	NA	NA	NA		NA	NA	NA	NA
unitig40_13	280.68	330.51	183.5	231.76		-0.238031	7.41095	0.718935	0.896284		0.139911	7.66373	0.832753	0.97505		-0.810485	7.29299	0.220632	0.404547		0.349112	7.53449	0.596309	0.878504
unitig40_14	80	25.11	15.98	48.27		-0.690802	7.51716	0.295853	0.58333		-1.76827	7.2579	0.00902429	0.124659		-2.52422	7.16747	0.000290939	0.00445546		-1.10632	6.74501	0.0971998	0.416564
unitig40_15	1.2	1.17	1.46	2.26		0.969643	2.76726	0.202499	0.475856		-0.127463	2.21275	0.938413	1		0.0814009	2.36593	1	1		-1.12651	2.73743	0.131478	0.48111
unitig40_16	12.32	10.8	7.54	11.22		-0.101036	4.99612	0.885104	0.975541		-0.287443	4.97417	0.676639	0.911689		-0.912146	4.77112	0.184027	0.360938		-0.215241	4.90244	0.757426	0.951435
unitig40_17	12.41	9.49	19.25	12.82		0.0849286	3.52575	0.922178	0.99169		-0.48859	3.31857	0.500122	0.830165		0.426204	3.82918	0.569406	0.736184		-0.602463	3.35336	0.410185	0.769787
unitig40_18	8.96	10.34	16.61	15.22		0.79422	2.71933	0.338539	0.626882		0.126147	2.40283	0.946047	1		0.70605	2.78417	0.350922	0.546379		-0.697246	2.7794	0.354665	0.734867
unitig40_19	11.72	35.97	30.33	28.69		1.33055	3.75058	0.0682637	0.260926		1.52268	3.95801	0.0366686	0.259649		1.1687	3.76038	0.106733	0.251674		0.163207	4.37989	0.825625	0.977963
unitig40_20	9.18	5.07	2.99	3.11		-1.53667	2.32486	0.0681747	0.260704		-0.967974	2.5539	0.212687	0.595144		-1.82536	2.34278	0.0280835	0.102346		0.540927	1.79169	0.542911	0.850975
unitig40_21	1.72	22.44	4.84	10.8		2.66526	2.55318	0.00194868	0.0257467		3.59617	3.41574	2.87e-05	0.00342288		1.26785	1.64899	0.199929	0.380399		0.90139	3.81853	0.201694	0.584186
unitig40_22	1.14	30.1	6.52	124.72		6.92345	5.30824	1.66e-12	5.39e-10		4.7444	3.31861	8.38e-07	0.000236281		2.46371	1.46109	0.0236304	0.0903472		-2.2105	5.61775	0.00149105	0.0289899
unitig40_23	5.19	11.76	7.07	2.41		-1.05271	0.967386	0.324544	0.612641		1.07788	2.04828	0.252505	0.645894		0.247086	1.6069	0.909315	0.96954		2.10534	1.74421	0.0171989	0.153954
unitig40_24	17.16	27.42	45.3	29.25		0.80293	2.45478	0.345195	0.632971		0.569673	2.38107	0.527497	0.836829		1.18954	2.82691	0.141526	0.304829		-0.262289	2.68915	0.769341	0.95465
unitig40_25	31.19	13.25	10.22	8.59		-1.83137	4.42123	0.0104061	0.0821512		-1.33591	4.61105	0.0565792	0.328743		-1.81016	4.53599	0.0104655	0.0513829		0.466895	3.57834	0.512406	0.839356
unitig40_26	1.92	0.23	0.67	2.17		0.260568	1.90351	0.77773	0.921986		-2.80524	1.00577	0.00977491	0.130619		-1.69155	1.24737	0.078524	0.206072		-3.10126	1.25408	0.00472911	0.0658271
unitig40_27	278.45	279.34	203.22	380.47		0.487909	9.34536	0.45723	0.731037		-0.0914056	9.10269	0.889463	0.998589		-0.653097	8.90883	0.320773	0.516108		-0.608157	9.35863	0.354476	0.734867
unitig40_28	498.21	93.47	108.07	75.15		-2.69244	8.23742	0.000116171	0.00300375		-2.51109	8.32956	0.000289931	0.0185688		-2.40312	8.3974	0.000498005	0.00623168		0.152537	6.48307	0.817426	0.97387
unitig40_29	1.24	4.2	15.37	1.21		-0.000756417	1.12972	1	1		1.59798	2.14193	0.0678523	0.358521		3.38236	3.62225	5.15e-05	0.00151164		1.57138	2.06198	0.0656162	0.338545
unitig40_30	0.24	3.24	13.56	1.7		2.77979	0.364828	0.0577711	0.237282		3.49882	0.944405	0.00744743	0.112229		5.46307	2.63969	4.47e-06	0.000258066		0.685377	1.26811	0.545468	0.850975
unitig40_31	18.02	13.99	11.22	3.42		-2.3549	4.40412	0.00128071	0.018832		-0.461754	5.00899	0.493502	0.827906		-0.877385	4.89563	0.197894	0.378475		1.86492	4.09667	0.0098986	0.105456
unitig40_32	14.43	10.71	7.56	383.02		4.75795	7.77419	7.89e-10	1.26e-07		-0.542265	3.80351	0.449426	0.795863		-1.13114	3.63213	0.120456	0.272665		-5.32946	7.81533	2.08e-11	4.77e-09
unitig40_33	54.93	23.55	13.5	38.06		-0.488254	5.64764	0.471232	0.740412		-1.31349	5.42088	0.0536664	0.320633		-2.22719	5.25677	0.00160969	0.0140068		-0.85412	5.08365	0.207249	0.591586
unitig40_34	7.78	14.37	32.72	7.36		-0.0517905	4.54971	0.947986	1		0.780755	5.08565	0.251624	0.64442		1.86667	5.90776	0.00686899	0.0377439		0.803796	5.03743	0.234588	0.626739
unitig40_35	41.47	22.86	21.93	38.17		-0.0835243	4.49656	0.919061	0.990524		-0.95695	4.19545	0.16887	0.541381		-1.11546	4.19056	0.116134	0.266077		-0.902366	4.13437	0.198957	0.58067
unitig40_36	1.96	2.28	6.78	6.6		1.78841	1.68799	0.0625616	0.248851		0.190792	0.795899	1	1		1.59322	1.67704	0.107412	0.252504		-1.62881	1.68657	0.0611377	0.32432
unitig40_37	0.51	1.57	1.96	1.64		1.76419	1.44542	0.0837197	0.291473		1.57498	1.38694	0.122481	0.468531		1.79941	1.59586	0.0880012	0.220954		-0.219097	1.89287	0.870304	0.990962
unitig40_38	14.43	5.97	12.09	16.63		0.248417	3.25484	0.75332	0.912118		-1.37144	2.64153	0.0854071	0.395525		-0.446102	3.02705	0.554174	0.723325		-1.64937	2.8263	0.0344414	0.236023
unitig40_39	10.06	6.64	4.94	3.07		-1.69234	2.43338	0.0404521	0.191717		-0.696926	2.80518	0.374612	0.742308		-1.19362	2.67182	0.131297	0.28858		0.967898	2.04314	0.254857	0.647414
unitig40_40	30.13	36.09	15.79	39.95		0.444852	6.50575	0.502298	0.762055		0.165808	6.41815	0.805819	0.963882		-1.13024	5.92234	0.0929341	0.229268		-0.307892	6.62527	0.643237	0.90175
unitig40_41	6.06	4.35	7.6	6.49		0.142914	4.34769	0.836674	0.952738		-0.573739	4.07667	0.41505	0.768302		0.132736	4.45926	0.860164	0.935893		-0.745578	4.14983	0.280214	0.675887
unitig40_42_partial	3.66	3.05	4.66	10.62		1.564	4.09969	0.0300191	0.158434		-0.37607	3.00981	0.646292	0.90244		0.137285	3.31074	0.879524	0.949563		-1.9694	4.04219	0.00585531	0.0763079
unitig41_1	1.4	1.92	0.65	1.79		0.428231	1.4743	0.717697	0.89603		0.452904	1.54979	0.638759	0.898596		-1.32862	0.847596	0.283653	0.478484		-0.00415303	1.66752	1	1
unitig41_2	18.72	12.27	11.38	5.99		-1.61208	4.25578	0.0243676	0.139824		-0.705983	4.60682	0.301762	0.688484		-0.921565	4.57638	0.181326	0.357261		0.87759	3.82659	0.213024	0.600075
unitig41_3	5.43	15.86	2.72	4.93		-0.124745	1.07361	1	1		1.44656	2.03596	0.0994744	0.422379		-1.17819	0.767891	0.352672	0.547261		1.54416	1.92827	0.0797222	0.377967
unitig41_4	3.24	5.92	7.93	10.37		1.69523	3.45398	0.0243599	0.139824		0.752052	2.87899	0.331331	0.71529		1.06535	3.13295	0.157209	0.324833		-0.972401	3.6791	0.172492	0.547426
unitig41_5	613.05	650.05	415.12	606.69		0.0231448	8.22483	0.972888	1		-0.0111782	8.27445	0.987363	1		-0.760785	7.99984	0.249136	0.438703		-0.0631618	8.2673	0.924025	1
unitig41_6	6.06	13.23	23.82	7.33		0.320559	3.59813	0.663944	0.86617		1.04034	4.10646	0.143864	0.507483		1.78368	4.69268	0.0122415	0.057038		0.69105	4.17866	0.323893	0.711462
unitig41_7	0	0.3	0.62	0		NA	NA	NA	NA		NA	NA	unitig41_7	3.8308		0.52381	0.699292	NA	NA		NA
unitig41_8	4.88	15.71	22.02	5.03		0.0695121	3.80391	0.935487	0.998253		1.58273	4.8302	0.0236831	0.208126		1.96626	5.17609	0.00520408	0.0313181		1.48456	4.80866	0.0317141	0.225741
unitig41_9	2.24	1.45	3.31	1.22		-0.812794	2.47337	0.333198	0.622464		-0.726644	2.56306	0.361157	0.737707		0.363639	3.13505	0.637939	0.790806		0.057674	2.13227	1	1
unitig41_10	10.97	10.19	7.61	3.62		-1.57225	3.39632	0.0338023	0.172171		-0.190888	3.9604	0.789028	0.957736		-0.710359	3.78431	0.316206	0.511163		1.35322	3.32686	0.0653334	0.337702
unitig41_11	26.37	31.69	49.8	17.69		-0.544808	4.02509	0.43889	0.718592		0.165452	4.42571	0.816649	0.969079		0.717233	4.79612	0.297555	0.492679		0.681598	4.1729	0.33113	0.717839
unitig41_12	22.24	18.92	20.47	15.59		-0.492151	2.79353	0.528051	0.77802		-0.330647	2.92501	0.663121	0.907123		-0.336751	2.97064	0.669968	0.81385		0.132906	2.66515	0.88223	0.99423
unitig41_13	6.02	1.61	2.6	2.53		-1.20614	2.33975	0.130701	0.376757		-1.9893	2.18332	0.0228861	0.203234		-1.40272	2.37532	0.0864175	0.21866		-0.812344	1.41347	0.369464	0.7459
unitig41_14	186.89	940.99	1134.84	1071.85		2.55659	7.41701	0.000247783	0.00545574		2.23535	7.21553	0.00120041	0.0409485		2.40245	7.40595	0.000533361	0.00648285		-0.350106	8.08417	0.594354	0.877466
unitig41_15	4.61	5.14	9.51	3.76		-0.253948	3.8665	0.737745	0.904061		0.0668199	4.08829	0.946578	1		0.852109	4.59596	0.217387	0.401025		0.292039	3.94819	0.688521	0.924555
unitig41_16	2.45	4.18	8.11	2.3		-0.149393	0.394904	1	1		0.584609	0.786867	0.700311	0.922449		1.36926	1.30248	0.180372	0.356098		0.707309	0.662246	0.580436	0.873296
unitig41_17	38.47	220.91	52.47	290.15		2.95432	7.90903	2.99e-05	0.00108959		2.42718	7.52153	0.000467052	0.0254739		0.251191	6.0333	0.709713	0.841303		-0.556006	8.54172	0.397627	0.761408
unitig41_18	52.86	13.82	14.86	25.99		-0.990501	5.11859	0.147481	0.403224		-2.03298	4.90359	0.00398468	0.0798258		-2.03288	4.95264	0.0037119	0.0246442		-1.07142	4.17527	0.127527	0.475813
unitig41_19	3.98	1.96	1.17	1.71		-1.20614	2.33975	0.130701	0.376757		-1.12286	2.4198	0.157034	0.527391		-1.94496	2.23336	0.0202064	0.0809785		0.054985	1.76628	1	1
unitig41_20	24.31	30.01	30.14	25.7		0.118429	4.64848	0.878432	0.973086		0.213409	4.76523	0.765888	0.950521		0.113516	4.76304	0.886257	0.953463		0.0661635	4.79712	0.924498	1
unitig41_21	25.54	28.27	26.1	30.1		0.270594	5.8602	0.688742	0.878886		0.0492916	5.80971	0.944886	1		-0.170359	5.75255	0.799117	0.900718		-0.250149	5.92902	0.710635	0.933094
unitig41_22	29.19	27.62	9.92	28.63		0.0111204	4.96895	0.990208	1		-0.174096	4.94422	0.802176	0.963158		-1.76205	4.43712	0.0134426	0.0609876		-0.214055	4.93142	0.76204	0.952587
unitig41_23	294.69	230.9	191.35	134.97		-1.08502	5.82864	0.107775	0.339003		-0.44679	6.13294	0.504661	0.833607		-0.818357	6.03667	0.22136	0.405531		0.609461	5.59097	0.362317	0.741754
unitig41_24	1.65	3.39	5.12	1.39		-0.206687	3.15427	0.803434	0.935275		0.929237	3.85828	0.199355	0.577128		1.41636	4.24476	0.0466692	0.1453		1.1074	3.75244	0.122361	0.46892
unitig41_25	11.42	10.23	15.24	8.48		-0.384434	4.65439	0.58313	0.815777		-0.250589	4.77986	0.716579	0.930515		0.220471	5.06745	0.753282	0.870855		0.10506	4.56729	0.889805	0.994985
unitig41_26	918.88	370.14	1135.6	57.19		-3.96799	9.68126	7.34e-08	6.2e-06		-1.40797	10.1204	0.0345946	0.256289		0.106614	10.765	0.870636	0.943838		2.53123	8.4496	0.000260849	0.00786911
unitig41_27	0.39	0.36	3.36	2.25		2.5525	1.74822	0.0112943	0.0868122		-0.2153	0.182485	1	1		2.87971	2.13847	0.00212562	0.0167444		-2.80205	1.66067	0.00402553	0.0585147
unitig41_28	321.84	387.95	404.69	224.09		-0.48464	8.01945	0.46165	0.733694		0.173982	8.39824	0.791537	0.958588		0.131944	8.42745	0.841326	0.924348		0.629792	8.16857	0.338815	0.722626
unitig41_29	2.72	1.86	7.8	1.14		-1.19443	0.410051	0.333681	0.622464		-0.533728	0.660729	0.840166	0.977282		1.32199	1.68493	0.171886	0.34445		0.636047	0.178627	0.63315	0.897077
unitig41_30	0.25	1.22	1.84	0		NA	NA	NA	unitig41_30		0.0401912	0.186957	0.562475	unitig41_30		0.357817	0.084472	0.215667	unitig41_30		-0.275534	0.0347826	0.236625
unitig41_31	0	0.12	9.46	0		NA	NA	NA	NA		NA	NA	unitig41_31	7.97932		1.8e-05	0.000690327	NA	NA		NA
unitig41_32	0	0	0.99	0		NA	NA	NA	NA		NA	NA	NA	NA		NA	NA	NA	NA
unitig41_33	13.55	35.74	46.9	17.43		0.402388	5.47664	0.553302	0.796691		1.30524	6.12335	0.0538368	0.320978		1.59347	6.38533	0.0192567	0.0785072		0.874046	6.22204	0.189471	0.56649
unitig41_34	5.67	8.55	9.58	5.58		0.0195596	4.20579	1	1		0.496782	4.533	0.472007	0.812532		0.556035	4.61953	0.424572	0.615949		0.448462	4.51264	0.524364	0.841204
unitig41_35	34.18	19.81	7.38	25.11		-0.407796	5.0705	0.550936	0.794634		-0.881967	4.94791	0.200526	0.579375		-2.39438	4.61057	0.000902305	0.00934696		-0.503025	4.688	0.463603	0.80532
unitig41_36	16.67	10.6	10.09	7.22		-1.16494	4.41267	0.0926926	0.309524		-0.748123	4.62092	0.284615	0.674324		-0.926855	4.60488	0.180092	0.356071		0.388149	4.00128	0.594967	0.877466
unitig41_37	8.24	22.99	20.51	12.33		0.61765	3.46573	0.413081	0.700306		1.39171	4.04451	0.0538805	0.320978		1.12523	3.91132	0.117391	0.268054		0.745301	4.19526	0.28596	0.676363
unitig41_38	275.12	263.77	141.98	98.34		-1.44644	8.50932	0.0304301	0.159459		-0.156865	9.04941	0.811159	0.966804		-1.15282	8.71224	0.0822703	0.212837		1.26075	8.43941	0.0580393	0.314722
unitig41_39	3070.97	300.2	1088.11	3675.42		0.296846	11.5906	0.650032	0.859559		-3.45094	10.6273	1.57e-06	0.000358319		-1.69585	10.9407	0.0115381	0.0548704		-3.77664	10.8954	2.23e-07	1.87e-05
unitig41_40	136.48	64.01	17.16	57.55		-1.20985	5.74687	0.0733191	0.272233		-1.18797	5.81874	0.0798384	0.385908		-3.19515	5.4847	1.39e-05	0.000567766		-0.00691403	5.08589	1	1
unitig41_41	1904.3	1864.47	2239.97	1680.13		-0.143057	11.2755	0.826886	0.948233		-0.126636	11.3502	0.846492	0.981114		0.0352704	11.4813	0.957074	0.998991		-0.0124188	11.2585	0.984946	1
unitig41_42	85.43	83.88	45.95	38.89		-1.09844	6.47857	0.100564	0.324283		-0.124448	6.9328	0.853197	0.984028		-1.09271	6.59716	0.10232	0.244256		0.945209	6.44141	0.157153	0.524395
unitig41_43	2474.53	3260.96	4085.51	3200.44		0.408843	11.8582	0.532289	0.782016		0.302064	11.8652	0.644279	0.901724		0.524473	12.0436	0.423505	0.614717		-0.135619	12.0444	0.83567	0.980117
unitig41_44	110.28	168.57	131.58	4.75		-4.50298	7.42904	4e-09	5.05e-07		0.515827	8.71715	0.432576	0.780075		0.0556344	8.5156	0.933197	0.983509		4.99033	7.96454	1.57e-10	2.68e-08
unitig41_45	25.64	8.86	3.25	5.22		-2.23744	4.33911	0.00186095	0.0248176		-1.62321	4.5327	0.0202894	0.188906		-3.14785	4.31686	3.33e-05	0.00109986		0.585804	3.25241	0.436716	0.786818
unitig42_1	0	0	0	2.56		8.33506	2.038	2.94e-06	0.000156578		NA	NA	NA	NA		NA	NA	unitig42_1	-8.60747		7.45e-07	5.4e-05
unitig42_2	1.7	5.66	6.95	3.34		1.02466	3.04007	0.178732	0.447834		1.65449	3.55088	0.0278318	0.22559		1.85759	3.75729	0.0116709	0.0551928		0.600989	3.80922	0.400249	0.763825
unitig42_3	32.59	25.76	26.13	12.54		-1.33775	4.56522	0.0548887	0.232624		-0.433423	4.95341	0.524607	0.835671		-0.511721	4.97051	0.454506	0.641495		0.875715	4.32711	0.205843	0.589784
unitig42_4	1.21	0.79	1.62	1.4		0.232985	0.940502	0.866239	0.967127		-0.751142	0.582366	0.670342	0.90926		0.162073	1.00652	1	1		-1.01474	0.675051	0.394643	0.759437
unitig42_5	2.43	1.08	1.18	0.42		-2.36149	0.773232	0.0295884	0.157241		-1.3027	1.03912	0.26675	0.660353		-1.18316	1.11234	0.219277	0.403362		1.03734	0.077507	0.442579	0.790687
unitig42_6	5.8	6.37	6.96	15.72		1.4515	3.67303	0.0454394	0.206443		0.0114065	2.85296	1	1		0.058875	2.92691	1	1		-1.46938	3.69693	0.0397021	0.255935
unitig42_7	11.83	13.78	11.38	9.07		-0.342863	4.17138	0.627161	0.844368		0.123603	4.46327	0.862341	0.988671		-0.2588	4.32443	0.714505	0.844741		0.43774	4.28754	0.533601	0.84691
unitig42_8	28.84	5.44	1.8	13.29		-1.07123	4.34996	0.120818	0.360959		-2.51659	4.06972	0.000741782	0.0320812		-4.2014	3.94856	3.76e-07	4.09e-05		-1.47454	3.24508	0.0440131	0.271345
unitig42_9	12.02	4.52	2.82	2.35		-2.29923	4.18963	0.00160982	0.0222403		-1.50285	4.42555	0.0335425	0.253186		-2.29549	4.29742	0.00168865	0.0144275		0.768057	3.16748	0.293234	0.685345
unitig42_10	30.94	22.56	9.71	17.8		-0.761262	4.62014	0.270256	0.560425		-0.55234	4.76694	0.41857	0.770568		-1.8624	4.40424	0.00835338	0.043823		0.180172	4.35313	0.810049	0.972908
unitig42_11	258	174.78	169.32	135.17		-0.89672	5.78125	0.181444	0.450737		-0.659069	5.93523	0.326985	0.712029		-0.807483	5.92961	0.228121	0.413344		0.208857	5.43985	0.759962	0.952457
unitig42_12	27.63	49.58	82.46	58		1.11521	4.2194	0.11632	0.353519		0.746473	4.04744	0.293109	0.681418		1.38506	4.52866	0.0505512	0.152952		-0.397667	4.52769	0.568188	0.864883
unitig42_13	11.2	11.46	5.96	8.52		-0.31492	2.45294	0.742425	0.906717		-0.0284685	2.65012	1	1		-1.09302	2.24901	0.194613	0.374569		0.257923	2.48034	0.780694	0.95815
unitig42_14	2.26	11.37	3.92	1.18		-0.983879	0.751944	0.438083	0.718557		2.22835	2.61155	0.00740286	0.112157		0.603614	1.55159	0.545468	0.715153		3.18796	2.40843	0.000259582	0.00785885
unitig42_15	4.66	3.57	3.42	1.65		-1.47919	1.52645	0.12613	0.369904		-0.466196	1.92546	0.579401	0.866269		-0.686792	1.87886	0.438358	0.627684		0.986462	1.30945	0.343208	0.725752
unitig42_16	0.31	0.69	1.18	0.69		1.08949	-0.520308	0.658385	0.863447		0.971618	-0.528453	0.658385	0.904744		1.61557	-0.206807	0.430642	0.620978		-0.149942	-0.402416	1	1
unitig42_17	2.82	1.38	6.81	2.97		0.113414	1.1836	1	1		-1.10911	0.753257	0.352672	0.73022		1.06643	1.83486	0.21793	0.401676		-1.25338	0.808672	0.26675	0.659448
unitig42_18	1.73	2.05	3.24	2.12		0.310148	2.81187	0.717001	0.89603		0.152953	2.79168	0.873769	0.992081		0.69669	3.15483	0.365261	0.560376		-0.186068	2.90796	0.834179	0.979935
unitig42_19	9.81	12.49	28.07	7.26		-0.414998	3.55249	0.564733	0.805468		0.237865	3.937	0.746326	0.94204		1.31011	4.66311	0.0619043	0.174355		0.62424	3.73772	0.390507	0.758345
unitig42_20	18.96	114.34	144.92	199.73		3.40736	5.18627	6.28e-06	0.000306943		2.46483	4.4405	0.000871767	0.0356035		2.70454	4.69473	0.000273366	0.004318		-0.971645	5.69147	0.147436	0.510404
unitig42_21	9.16	7.72	5.64	2.73		-1.68959	1.66365	0.0781883	0.282256		-0.356848	2.16829	0.752733	0.947809		-0.897278	1.9929	0.282111	0.477826		1.3065	1.50889	0.169557	0.54392
unitig42_22	14.27	7.33	12.85	11.47		-0.27505	1.13613	0.763627	0.916201		-1.04209	0.898445	0.394643	0.752977		-0.346463	1.20053	0.884696	0.952387		-0.796782	0.74085	0.514813	0.839974
unitig42_23	29.99	14.83	12.29	21.65		-0.442257	4.28043	0.53109	0.780701		-1.1265	4.08626	0.107908	0.439807		-1.48324	4.02722	0.0365026	0.12249		-0.71315	3.79826	0.310483	0.700408
unitig42_24	6.71	4.53	4.68	3.41		-0.972875	2.33108	0.226132	0.507686		-0.687096	2.49299	0.403125	0.756498		-0.706678	2.53128	0.37428	0.56772		0.257527	1.99941	0.761112	0.952457
unitig42_25	0	1.28	0.98	2.56		6.81985	0.760542	0.00199604	0.0261652		5.78033	0.0298987	0.0347826	0.256289		5.34653	-0.218882	0.0942029	0.230654		-1.14324	1.09319	0.285115	0.676159
unitig42_26	10.23	7.47	1.97	8.29		-0.273413	4.04859	0.713429	0.89475		-0.559026	3.98806	0.428925	0.778641		-2.58864	3.48211	0.000698481	0.00783851		-0.314448	3.82116	0.660865	0.911809
unitig42_27	23.58	27.52	33.42	37.01		0.696201	3.76173	0.338327	0.626882		0.127293	3.50335	0.868708	0.990286		0.310513	3.65365	0.692884	0.830641		-0.597875	3.84272	0.399534	0.762803
unitig42_28	8.28	2.43	1.87	3.54		-1.17186	3.3126	0.118207	0.357053		-1.88112	3.17721	0.0129529	0.150832		-2.32713	3.13008	0.00305502	0.0214915		-0.738221	2.3955	0.374441	0.7459
unitig42_29	58.07	38.28	78.91	23.33		-1.27438	5.81888	0.0600027	0.242971		-0.699031	6.07945	0.295678	0.683839		0.242765	6.5671	0.714161	0.844569		0.546585	5.41396	0.415487	0.774085
unitig42_30	0	0.91	0.62	0		NA	NA	NA	unitig42_30		-0.728015	0.285714	0.674324	unitig42_30		-0.937524	0.52381	0.699292	unitig42_30		-0.922203	0.285714	0.676159
unitig42_31	59.56	120.49	109.59	428.26		2.88047	6.80551	5.21e-05	0.00168146		0.91777	5.34807	0.17549	0.550328		0.676732	5.24678	0.320681	0.516108		-1.99164	7.00088	0.00354198	0.0524003
unitig42_32	179.62	147.53	192.34	134.84		-0.373973	6.43636	0.573965	0.811653		-0.380203	6.49999	0.566063	0.858693		-0.0996853	6.6804	0.884033	0.952387		-0.0350582	6.28309	0.962522	1
unitig42_33	2.57	2.7	1.88	4.78		0.898977	1.74487	0.348276	0.636137		-0.0571263	1.28782	1	1		-0.755529	1.03582	0.514813	0.693502		-0.985978	1.71375	0.261464	0.653043
unitig42_34	1.54	12.73	14.68	5.94		1.89009	1.95598	0.0312329	0.162208		2.84102	2.77232	0.00108002	0.0393605		2.95396	2.92168	0.000537282	0.00651186		0.921688	3.07836	0.216315	0.603187
unitig42_35	101.72	28.49	32.54	20.87		-2.24635	5.88309	0.00131787	0.0193112		-1.93233	6.00844	0.00493774	0.0888378		-1.84511	6.07761	0.00724228	0.0394627		0.285294	4.59035	0.680856	0.922279
unitig42_36	5.54	17.75	25.74	21.63		2.00901	5.38284	0.00413451	0.0432105		1.59313	5.1315	0.0217124	0.197254		2.02336	5.51524	0.00393676	0.0257372		-0.444801	5.90489	0.503579	0.83262
unitig42_37	22.23	28.3	19.55	26.67		0.304175	5.88983	0.651239	0.860598		0.256106	5.93018	0.706771	0.92541		-0.381258	5.66737	0.572701	0.738477		-0.0769089	6.05521	0.908494	1
unitig42_38	3.43	6.63	14.97	4.78		0.512886	1.6409	0.656347	0.863447		0.849477	1.90366	0.330406	0.714387		1.9177	2.69323	0.0200703	0.0809733		0.30792	2.02563	0.761112	0.952457
unitig42_39	81.59	68.76	60.38	69.05		-0.204352	7.24246	0.757551	0.913448		-0.344316	7.24558	0.602494	0.878982		-0.633451	7.17594	0.338455	0.532375		-0.168802	7.11724	0.798886	0.967513
unitig42_40	1.93	0.89	2.37	1.23		-0.626149	0.583748	0.670342	0.868183		-1.31881	0.410452	0.333681	0.715792		0.0381728	0.946223	1	1		-0.722544	0.0861801	0.7999	0.967513
unitig42_41	13.72	8.5	7.41	3.94		-1.76614	3.10557	0.0183681	0.118064		-0.786595	3.46319	0.291353	0.67994		-1.0873	3.40291	0.138111	0.2996		0.951556	2.63444	0.210778	0.59698
unitig42_42	4.41	8.33	10.22	2.15		-0.995637	2.27879	0.23162	0.515897		0.83322	3.23498	0.255394	0.647833		1.0319	3.41629	0.160311	0.329238		1.80122	2.91843	0.0183681	0.160267
unitig42_43	9.78	15.37	12.82	4.06		-1.21333	3.79976	0.0955034	0.314195		0.559974	4.66382	0.425956	0.776056		0.198167	4.5094	0.784623	0.891489		1.74493	4.26223	0.0139677	0.133338
unitig42_44	117.06	45.3	38.45	61.03		-0.901518	6.39399	0.177609	0.446836		-1.46651	6.28531	0.0300622	0.235999		-1.80574	6.25208	0.00832281	0.0437218		-0.593833	5.6738	0.375731	0.747143
unitig42_45	4.59	24.56	40.81	327.85		6.18656	8.4761	9.43e-14	3.8e-11		2.3134	4.94512	0.00124098	0.041632		2.94314	5.53137	5.59e-05	0.00160354		-3.90222	8.6095	1.17e-07	1.11e-05
unitig42_46	5.27	8.98	10.37	28.03		2.43868	4.60351	0.000853644	0.0139335		0.660471	3.37878	0.382611	0.750876		0.769655	3.49816	0.303847	0.498158		-1.80742	4.7573	0.0101393	0.106913
[truncated: 6,631 more rows]
